# Supplementary material for: Specific binding of Hsp27 and phosphorylated Tau mitigates abnormal Tau aggregation-induced pathology
Source: eLife. 2022 Sep 1;11:e79898. doi: 10.7554/eLife.79898 (PMC9436411; doi:10.7554/eLife.79898)
Supplement: Figure 2—source data 2. — (Figure 2B). [file elife-79898-fig2-data2.xlsx]

## Sheet: S262
Tau+GFP 2D	Tau+Hsp27 2D	Tau+GFP 10D	Tau+Hsp27 10D
1	0.461566	1.16703	0.0532752
1	0.442425	0.678872	0.100078
1	0.656944	0.726477	0.113286

## Sheet: 5A6
Tau+GFP 2D	Tau+Hsp27 2D	Tau+GFP 10D	Tau+Hsp27 10D
1	0.451964	0.769046	0.3934
1	0.610322	0.587857	0.16415
1	0.460511	0.559075	0.227251

## Sheet: At8
Tau+GFP 2D	Tau+Hsp27 2D	Tau+GFP 10D	Tau+Hsp27 10D
1	0.280464	1.46291	0.163976
1	0.246812	1.72384	0.279672
1	0.313916	1.3756	0.355922
