# Supplementary material for: Specific binding of Hsp27 and phosphorylated Tau mitigates abnormal Tau aggregation-induced pathology
Source: eLife. 2022 Sep 1;11:e79898. doi: 10.7554/eLife.79898 (PMC9436411; doi:10.7554/eLife.79898)
Supplement: Figure 3—source data 1. — ThT fluorescence profiles of pTau40 (Figure 3D) and pK19 (Figure 3E) in the absence or presence of Hsp27 at the indicated concentrations. [file elife-79898-fig3-data1.xlsx]

## Sheet: B (left)
time	20 uM	10 uM	5 uM	2.5 uM	1.25uM
0	-0.05304	-0.02196	-0.00573	-0.00366	-0.03791
0.2	-0.05198	-0.02153	-0.00546	-0.00333	-0.03733
0.4	-0.05101	-0.0208	-0.00552	-0.00294	-0.03682
0.6	-0.04999	-0.01977	-0.00549	-0.00198	-0.03619
0.8	-0.04859	-0.01899	-0.0054	-0.00171	-0.03557
1	-0.04701	-0.01803	-0.00481	-0.00073	-0.03471
1.2	-0.04594	-0.01736	-0.00464	-0.00019	-0.0344
1.4	-0.04463	-0.01624	-0.00402	0.000608	-0.0336
1.6	-0.04341	-0.01536	-0.00345	0.000853	-0.03329
1.8	-0.04251	-0.01447	-0.00324	0.001321	-0.03323
2	-0.04197	-0.01386	-0.00304	0.001644	-0.03361
2.2	-0.04135	-0.0133	-0.00272	0.001841	-0.03376
2.4	-0.04088	-0.01312	-0.00255	0.001368	-0.03381
2.6	-0.04027	-0.01268	-0.00255	0.001236	-0.03399
2.8	-0.03945	-0.01175	-0.00203	0.001988	-0.03416
3	-0.03793	-0.01072	-0.00083	0.002875	-0.03379
3.2	-0.03699	-0.0096	-2.9e-05	0.003226	-0.03364
3.4	-0.03629	-0.00908	0.000698	0.003764	-0.03369
3.6	-0.03566	-0.00874	0.001386	0.003682	-0.03397
3.8	-0.035	-0.00841	0.001302	0.003471	-0.03407
4	-0.03386	-0.00796	0.001922	0.003762	-0.03394
4.2	-0.03295	-0.00739	0.002294	0.003775	-0.03367
4.4	-0.03225	-0.00687	0.002362	0.003998	-0.03378
4.6	-0.03204	-0.00691	0.002213	0.004133	-0.03407
4.8	-0.03135	-0.00671	0.00264	0.004097	-0.03407
5	-0.03109	-0.00693	0.002736	0.004387	-0.0341
5.2	-0.03039	-0.00658	0.002982	0.004618	-0.0342
5.4	-0.02937	-0.0061	0.003336	0.005094	-0.03372
5.6	-0.02907	-0.00584	0.003642	0.005429	-0.03398
5.8	-0.02827	-0.00539	0.003819	0.006189	-0.03355
6	-0.02803	-0.00497	0.003973	0.006662	-0.03337
6.2	-0.02724	-0.00434	0.004551	0.006992	-0.03278
6.4	-0.02706	-0.00406	0.004971	0.006803	-0.0329
6.6	-0.02626	-0.00319	0.005771	0.007736	-0.03245
6.8	-0.02526	-0.00246	0.006816	0.008878	-0.0319
7	-0.02443	-0.00154	0.007273	0.00929	-0.0316
7.2	-0.02385	-0.00092	0.007476	0.009453	-0.03137
7.4	-0.02302	-0.00089	0.007884	0.010041	-0.03145
7.6	-0.02249	-0.00057	0.007983	0.009867	-0.03135
7.8	-0.02169	0.000289	0.007835	0.009933	-0.03138
8	-0.02154	0.000541	0.007604	0.009496	-0.03131
8.2	-0.02137	0.001188	0.00803	0.009601	-0.03126
8.4	-0.02162	0.001246	0.007967	0.009651	-0.03162
8.6	-0.02197	0.001344	0.007785	0.009865	-0.03176
8.8	-0.02198	0.00142	0.007916	0.009882	-0.0318
9	-0.02182	0.001137	0.007595	0.010144	-0.03183
9.2	-0.02159	0.001845	0.008296	0.010756	-0.03146
9.4	-0.02188	0.002022	0.008358	0.010631	-0.0314
9.6	-0.02256	0.002578	0.008799	0.010834	-0.03115
9.8	-0.02263	0.003011	0.008618	0.010685	-0.03081
10	-0.02286	0.003429	0.008911	0.010527	-0.03071
10.2	-0.0228	0.003606	0.009465	0.010217	-0.03079
10.4	-0.02338	0.003362	0.009706	0.009595	-0.03129
10.6	-0.02309	0.003648	0.010033	0.009834	-0.03107
10.8	-0.02251	0.003769	0.010486	0.010274	-0.03077
11	-0.02207	0.003971	0.010301	0.010213	-0.03153
11.2	-0.0219	0.0039	0.010681	0.010128	-0.0318
11.4	-0.02151	0.003783	0.011184	0.010466	-0.03183
11.6	-0.02183	0.003238	0.010973	0.010091	-0.03222
11.8	-0.02108	0.003863	0.011774	0.011046	-0.03215
12	-0.02073	0.004197	0.012645	0.011795	-0.03172
12.2	-0.02044	0.004681	0.013665	0.012731	-0.03124
12.4	-0.02049	0.00475	0.014018	0.01346	-0.03131
12.6	-0.02034	0.005066	0.014043	0.013931	-0.0314
12.8	-0.02084	0.00497	0.014141	0.014089	-0.03169
13	-0.0209	0.00527	0.014136	0.01479	-0.03133
13.2	-0.02145	0.005762	0.014298	0.014202	-0.0312
13.4	-0.02201	0.005791	0.013947	0.013986	-0.03134
13.6	-0.0222	0.00625	0.01391	0.014348	-0.03089
13.8	-0.02208	0.005937	0.013461	0.013989	-0.03111
14	-0.02154	0.006161	0.014166	0.013948	-0.03072
14.2	-0.02154	0.006637	0.013947	0.01395	-0.0305
14.4	-0.02183	0.006439	0.013603	0.013276	-0.03061
14.6	-0.02132	0.006992	0.013695	0.013605	-0.02993
14.8	-0.02079	0.007437	0.01383	0.013486	-0.02928
15	-0.02096	0.007551	0.013146	0.01321	-0.02969
15.2	-0.02098	0.007716	0.013501	0.012781	-0.02941
15.4	-0.0205	0.007458	0.013804	0.013353	-0.02907
15.6	-0.02077	0.007238	0.013871	0.013623	-0.02929
15.8	-0.01986	0.008072	0.015052	0.014736	-0.02846
16	-0.02015	0.008657	0.015187	0.014968	-0.02873
16.2	-0.02054	0.00902	0.015268	0.015228	-0.02928
16.4	-0.02056	0.00924	0.015468	0.01554	-0.02976
16.6	-0.02092	0.009698	0.015696	0.016013	-0.02989
16.8	-0.02171	0.009403	0.016124	0.016424	-0.03033
17	-0.02193	0.009378	0.016086	0.016516	-0.03034
17.2	-0.02217	0.009401	0.016577	0.016615	-0.03087
17.4	-0.02224	0.00937	0.016791	0.017386	-0.03116
17.6	-0.02183	0.009715	0.017566	0.017647	-0.03113
17.8	-0.02183	0.009292	0.017517	0.017585	-0.03193
18	-0.0218	0.009963	0.018295	0.018024	-0.03148
18.2	-0.02181	0.010029	0.01802	0.018075	-0.03168
18.4	-0.02152	0.010041	0.018422	0.018069	-0.0314
18.6	-0.02068	0.01097	0.019415	0.019037	-0.03001
18.8	-0.02073	0.011899	0.019652	0.019164	-0.02965
19	-0.0212	0.011739	0.019034	0.018974	-0.0302
19.2	-0.02059	0.012102	0.019715	0.018925	-0.02972
19.4	-0.0203	0.01208	0.020227	0.019241	-0.02931
19.6	-0.02052	0.012068	0.020499	0.019236	-0.02913
19.8	-0.02062	0.012277	0.020774	0.019639	-0.02858
20	-0.02071	0.01309	0.020841	0.020372	-0.02825
20.2	-0.01989	0.013727	0.021971	0.021014	-0.02722
20.4	-0.0192	0.014074	0.022559	0.0214	-0.02643
20.6	-0.01889	0.014823	0.023213	0.021969	-0.02592
20.8	-0.01896	0.015327	0.023645	0.022324	-0.02604
21	-0.01896	0.015647	0.023546	0.022069	-0.02607
21.2	-0.0189	0.01599	0.023776	0.022119	-0.02638
21.4	-0.01862	0.016625	0.023891	0.022425	-0.02645
21.6	-0.01913	0.016352	0.023993	0.022386	-0.02681
21.8	-0.01951	0.016049	0.023464	0.022249	-0.02722
22	-0.0192	0.016287	0.023968	0.022681	-0.02697
22.2	-0.01938	0.016049	0.02375	0.022495	-0.02724
22.4	-0.01921	0.016759	0.02398	0.023069	-0.0266
22.6	-0.01999	0.016715	0.023779	0.023153	-0.02674
22.8	-0.02066	0.016349	0.023018	0.022914	-0.02757
23	-0.02119	0.015328	0.022576	0.02245	-0.02834
23.2	-0.02148	0.014575	0.022594	0.021963	-0.0285
23.4	-0.02226	0.013492	0.022115	0.021154	-0.02901
23.6	-0.02284	0.012652	0.021905	0.021341	-0.02882
23.8	-0.02257	0.012652	0.022483	0.022116	-0.02796
24	-0.02253	0.012945	0.022656	0.022461	-0.02774
24.2	-0.02219	0.013259	0.023573	0.022297	-0.0274
24.4	-0.0223	0.01315	0.023669	0.022294	-0.02779
24.6	-0.02254	0.013467	0.023875	0.022064	-0.0282
24.8	-0.02259	0.013681	0.02434	0.022482	-0.02828
25	-0.02261	0.014044	0.024297	0.022155	-0.02854
25.2	-0.02243	0.014691	0.024924	0.022517	-0.02843
25.4	-0.02223	0.014844	0.025102	0.023202	-0.02855
25.6	-0.02216	0.014893	0.025284	0.023112	-0.0284
25.8	-0.02168	0.015518	0.02549	0.02329	-0.02799
26	-0.02083	0.016092	0.026119	0.02398	-0.02764
26.2	-0.02125	0.016394	0.026291	0.024116	-0.02768
26.4	-0.02112	0.016591	0.026251	0.024869	-0.02733
26.6	-0.0215	0.016205	0.025859	0.024898	-0.02773
26.8	-0.02155	0.016023	0.025715	0.024932	-0.02801
27	-0.02213	0.015909	0.025664	0.0247	-0.02858
27.2	-0.0221	0.01565	0.025746	0.024861	-0.0285
27.4	-0.02229	0.015746	0.025537	0.024544	-0.02856
27.6	-0.02221	0.015983	0.026075	0.025353	-0.02825
27.8	-0.02281	0.015927	0.025785	0.025428	-0.02857
28	-0.0238	0.015689	0.025393	0.024987	-0.0292
28.2	-0.02408	0.015502	0.025587	0.024755	-0.02924
28.4	-0.02419	0.015364	0.025559	0.024882	-0.02955
28.6	-0.02356	0.016033	0.02585	0.025399	-0.02917
28.8	-0.02252	0.016689	0.026551	0.026311	-0.02854
29	-0.02248	0.01716	0.0267	0.026434	-0.0282
29.2	-0.02214	0.017248	0.027075	0.026857	-0.02799
29.4	-0.02196	0.017505	0.026657	0.027209	-0.02817
29.6	-0.02146	0.018287	0.027161	0.027711	-0.02743
29.8	-0.02108	0.018965	0.027599	0.0285	-0.02662
30	-0.02071	0.019082	0.027965	0.028927	-0.02624
30.2	-0.02055	0.019321	0.028089	0.028926	-0.02613
30.4	-0.02061	0.019243	0.028036	0.029081	-0.0259
30.6	-0.02047	0.019906	0.028125	0.028928	-0.02591
30.8	-0.0209	0.019756	0.028455	0.029014	-0.02616
31	-0.02108	0.019804	0.028576	0.028961	-0.02641
31.2	-0.02121	0.019875	0.028788	0.028961	-0.02686
31.4	-0.02127	0.020096	0.029251	0.028875	-0.02695
31.6	-0.02156	0.019223	0.029414	0.029173	-0.02745
31.8	-0.0225	0.018487	0.029004	0.028524	-0.02789
32	-0.02258	0.018246	0.02947	0.028508	-0.02759
32.2	-0.02264	0.018113	0.029403	0.028797	-0.02749
32.4	-0.02249	0.018096	0.029816	0.02878	-0.02748
32.6	-0.02218	0.018244	0.030129	0.028824	-0.02728
32.8	-0.02199	0.01837	0.030565	0.029026	-0.02728
33	-0.02237	0.018478	0.030567	0.029061	-0.02737
33.2	-0.02211	0.01888	0.030599	0.029403	-0.02758
33.4	-0.02209	0.018837	0.029946	0.029318	-0.02793
33.6	-0.02193	0.019441	0.03055	0.029908	-0.02715
33.8	-0.02171	0.020376	0.030858	0.030251	-0.02672
34	-0.022	0.02042	0.030835	0.029958	-0.02694
34.2	-0.02193	0.021101	0.031071	0.029852	-0.02706
34.4	-0.02221	0.021251	0.031367	0.029976	-0.02704
34.6	-0.02207	0.022234	0.031549	0.030219	-0.02664
34.8	-0.02266	0.021778	0.031463	0.030347	-0.02692
35	-0.02281	0.022236	0.031265	0.030046	-0.02689
35.2	-0.02288	0.022508	0.031855	0.030469	-0.02655
35.4	-0.02278	0.022451	0.032343	0.030758	-0.0261
35.6	-0.02274	0.022059	0.032209	0.031029	-0.0262
35.8	-0.02266	0.022444	0.032578	0.031153	-0.02556
36	-0.02263	0.02241	0.032745	0.031792	-0.02545
36.2	-0.02287	0.02237	0.033081	0.031807	-0.02567
36.4	-0.02304	0.022096	0.033079	0.031421	-0.02587
36.6	-0.02285	0.022431	0.033084	0.031866	-0.0259
36.8	-0.02285	0.022606	0.033534	0.032619	-0.02573
37	-0.023	0.022617	0.033671	0.033191	-0.02609
37.2	-0.0231	0.022958	0.033723	0.033484	-0.02592
37.4	-0.02282	0.022773	0.033673	0.033357	-0.02613
37.6	-0.02284	0.023696	0.034726	0.03387	-0.02563
37.8	-0.02273	0.024162	0.035303	0.034424	-0.02559
38	-0.02301	0.023946	0.03544	0.033972	-0.02605
38.2	-0.02311	0.024368	0.03574	0.034132	-0.02605
38.4	-0.02285	0.024775	0.036177	0.03438	-0.02579
38.6	-0.02311	0.024927	0.036007	0.0344	-0.02575
38.8	-0.02373	0.024395	0.035721	0.033986	-0.02599
39	-0.02353	0.02453	0.035899	0.03391	-0.02573
39.2	-0.02333	0.024287	0.036323	0.034046	-0.02566
39.4	-0.02363	0.023975	0.035658	0.033956	-0.02617
39.6	-0.02382	0.024272	0.035867	0.034073	-0.02595
39.8	-0.02445	0.024439	0.035807	0.033854	-0.02615
40	-0.02489	0.024446	0.03596	0.033655	-0.02648
40.2	-0.02522	0.024206	0.035992	0.033422	-0.02652
40.4	-0.02509	0.02391	0.036015	0.033457	-0.02652
40.6	-0.02512	0.024059	0.036253	0.033883	-0.02638
40.8	-0.02548	0.024449	0.036612	0.03411	-0.02627
41	-0.02524	0.024682	0.03711	0.034528	-0.02615
41.2	-0.02504	0.025306	0.037727	0.034739	-0.02555
41.4	-0.02452	0.02545	0.03813	0.035077	-0.02511
41.6	-0.02416	0.026079	0.038756	0.035618	-0.02471
41.8	-0.02407	0.026041	0.038703	0.035849	-0.0248
42	-0.02386	0.02616	0.038615	0.035758	-0.0248
42.2	-0.02353	0.026488	0.038791	0.036213	-0.02448
42.4	-0.02315	0.026246	0.038863	0.036764	-0.02426
42.6	-0.02351	0.025126	0.038217	0.036469	-0.02501
42.8	-0.02384	0.024727	0.037974	0.036547	-0.02536
43	-0.02338	0.024814	0.03787	0.037128	-0.02557
43.2	-0.02403	0.024271	0.037526	0.036658	-0.0262
43.4	-0.02462	0.024579	0.036962	0.03688	-0.02638
43.6	-0.02485	0.025035	0.036973	0.036661	-0.02657
43.8	-0.02478	0.025054	0.036967	0.036969	-0.02673
44	-0.02466	0.024584	0.037336	0.036789	-0.02714
44.2	-0.02469	0.024268	0.037299	0.036801	-0.02722
44.4	-0.02435	0.024372	0.038007	0.036723	-0.02693
44.6	-0.02431	0.024675	0.038548	0.037256	-0.02666
44.8	-0.02426	0.024979	0.039217	0.037545	-0.02666
45	-0.02386	0.024789	0.039768	0.037803	-0.02654
45.2	-0.02356	0.025538	0.040007	0.038245	-0.02602
45.4	-0.02292	0.026083	0.040355	0.038646	-0.02533
45.6	-0.02208	0.026686	0.04077	0.0385	-0.0251
45.8	-0.02215	0.026574	0.040728	0.038491	-0.02524
46	-0.02195	0.026898	0.041252	0.038586	-0.02501
46.2	-0.02203	0.026941	0.041516	0.03881	-0.02486
46.4	-0.02266	0.026558	0.041582	0.038663	-0.0253
46.6	-0.0233	0.026812	0.04179	0.038487	-0.02562
46.8	-0.02375	0.02717	0.041915	0.038838	-0.02554
47	-0.02386	0.027715	0.042049	0.038982	-0.02561
47.2	-0.02458	0.028058	0.042121	0.038692	-0.02575
47.4	-0.0246	0.028716	0.042355	0.03927	-0.02552
47.6	-0.02548	0.028546	0.042118	0.03888	-0.02573
47.8	-0.02552	0.028445	0.042243	0.039218	-0.02522
48	-0.02579	0.028826	0.042695	0.039337	-0.02506
48.2	-0.02575	0.028949	0.042993	0.039739	-0.02441
48.4	-0.02569	0.029181	0.043496	0.040391	-0.02403
48.6	-0.02567	0.028698	0.043183	0.040771	-0.02438
48.8	-0.02587	0.028243	0.042718	0.040652	-0.02491
49	-0.02615	0.027937	0.041598	0.040542	-0.02547
49.2	-0.02596	0.028227	0.041239	0.040362	-0.0254
49.4	-0.02535	0.028337	0.041443	0.040451	-0.02559
49.6	-0.02538	0.028295	0.041299	0.040159	-0.02613
49.8	-0.02599	0.028066	0.041496	0.040429	-0.02649
50	-0.02605	0.028242	0.042214	0.040683	-0.02647
50.2	-0.02622	0.028149	0.042346	0.040722	-0.02625
50.4	-0.02634	0.028541	0.04303	0.04105	-0.02609
50.6	-0.02653	0.029204	0.043752	0.041592	-0.02578
50.8	-0.02608	0.029526	0.044071	0.041925	-0.02584
51	-0.02581	0.030149	0.044271	0.042268	-0.02576
51.2	-0.02563	0.030318	0.04441	0.042757	-0.02577
51.4	-0.02534	0.030684	0.044924	0.043019	-0.02529
51.6	-0.02519	0.030701	0.04514	0.042618	-0.02499
51.8	-0.02409	0.031061	0.045954	0.043213	-0.02392
52	-0.02358	0.031659	0.046936	0.043751	-0.02313
52.2	-0.02332	0.031716	0.047408	0.043773	-0.02282
52.4	-0.02381	0.031495	0.047398	0.043639	-0.02323
52.6	-0.02428	0.030587	0.046752	0.043026	-0.02385
52.8	-0.02517	0.030242	0.04624	0.042542	-0.02452
53	-0.02556	0.030254	0.045661	0.042572	-0.02489
53.2	-0.02577	0.030068	0.045693	0.041903	-0.02485
53.4	-0.02594	0.030376	0.046021	0.042046	-0.02504
53.6	-0.02664	0.030476	0.046005	0.042137	-0.02538
53.8	-0.02682	0.030825	0.046707	0.042877	-0.0249
54	-0.02681	0.031035	0.04702	0.043196	-0.02456
54.2	-0.02726	0.031135	0.046411	0.042986	-0.02444
54.4	-0.02702	0.031703	0.046647	0.043485	-0.02402
54.6	-0.02751	0.031374	0.046193	0.043389	-0.02479
54.8	-0.02701	0.03173	0.045903	0.043698	-0.02505
55	-0.02701	0.031707	0.045697	0.04426	-0.02491
55.2	-0.02669	0.032139	0.045909	0.044311	-0.02478
55.4	-0.02641	0.032744	0.046598	0.044243	-0.02453
55.6	-0.02609	0.032749	0.047046	0.044291	-0.02419
55.8	-0.02609	0.032723	0.047138	0.044455	-0.02401
56	-0.02678	0.032488	0.047443	0.044275	-0.02399
56.2	-0.02716	0.032232	0.047453	0.044418	-0.02449
56.4	-0.02798	0.03207	0.047627	0.044352	-0.0248
56.6	-0.02815	0.032386	0.047829	0.044495	-0.0248
56.8	-0.0286	0.032253	0.04797	0.044196	-0.02508
57	-0.02851	0.032489	0.048395	0.044643	-0.02485
57.2	-0.0292	0.032224	0.048558	0.04422	-0.02513
57.4	-0.02888	0.032774	0.049208	0.045088	-0.02465
57.6	-0.02879	0.03317	0.049542	0.04533	-0.02463
57.8	-0.02832	0.0336	0.050468	0.045846	-0.02379
58	-0.02847	0.033038	0.050126	0.045599	-0.02384
58.2	-0.02897	0.032339	0.049435	0.045259	-0.02418
58.4	-0.02904	0.031466	0.049206	0.045102	-0.02442
58.6	-0.02913	0.031047	0.048718	0.044771	-0.02487
58.8	-0.02844	0.03123	0.049162	0.044867	-0.02449
59	-0.02823	0.031176	0.049206	0.044999	-0.02425
59.2	-0.02735	0.031567	0.049521	0.045174	-0.02421
59.4	-0.02686	0.031213	0.049193	0.045207	-0.02417
59.6	-0.02658	0.031553	0.048688	0.045479	-0.02387
59.8	-0.02719	0.03107	0.047875	0.045465	-0.02428
60	-0.02753	0.030637	0.047759	0.045577	-0.0241
60.2	-0.0272	0.030916	0.047665	0.045952	-0.024
60.4	-0.02723	0.03184	0.0482	0.046322	-0.02358
60.6	-0.02654	0.032504	0.048422	0.046877	-0.02339
60.8	-0.02685	0.03261	0.048246	0.046905	-0.02336
61	-0.02698	0.03291	0.048546	0.04746	-0.02319
61.2	-0.0277	0.032747	0.048797	0.047337	-0.0233
61.4	-0.02766	0.033064	0.049129	0.047757	-0.02297
61.6	-0.02807	0.03328	0.049834	0.047808	-0.02321
61.8	-0.02837	0.03327	0.05007	0.04803	-0.02327
62	-0.02921	0.032674	0.049597	0.047935	-0.02396
62.2	-0.02967	0.032582	0.049964	0.047758	-0.02428
62.4	-0.02986	0.03265	0.049996	0.047494	-0.02441
62.6	-0.02975	0.033047	0.050641	0.047112	-0.0243
62.8	-0.02951	0.033264	0.051586	0.047324	-0.02401
63	-0.02948	0.033317	0.051772	0.047445	-0.02424
63.2	-0.02908	0.033973	0.052445	0.047955	-0.02423
63.4	-0.02933	0.034187	0.052201	0.047586	-0.02404
63.6	-0.02963	0.034856	0.052626	0.048082	-0.02409
63.8	-0.02985	0.034794	0.05292	0.048617	-0.02411
64	-0.02981	0.035074	0.053139	0.048839	-0.02399
64.2	-0.02908	0.03611	0.05363	0.049576	-0.02361
64.4	-0.02851	0.036926	0.054092	0.050326	-0.02343
64.6	-0.02804	0.037305	0.054562	0.051025	-0.02324
64.8	-0.02804	0.037068	0.054236	0.050895	-0.02351
65	-0.0288	0.036158	0.053754	0.050197	-0.02418
65.2	-0.029	0.035951	0.05347	0.050409	-0.02442
65.4	-0.02946	0.035451	0.053035	0.050163	-0.02509
65.6	-0.02984	0.035039	0.053119	0.050296	-0.02514
65.8	-0.02999	0.034921	0.052922	0.050123	-0.0251
66	-0.02999	0.034999	0.053088	0.050548	-0.02478
66.2	-0.03023	0.035058	0.053375	0.050286	-0.02475
66.4	-0.03044	0.034489	0.052871	0.049733	-0.02482
66.6	-0.03048	0.034491	0.053138	0.049807	-0.0246
66.8	-0.03024	0.034716	0.053566	0.05035	-0.02421
67	-0.03016	0.03477	0.053649	0.050622	-0.02447
67.2	-0.03054	0.035477	0.054068	0.050939	-0.02396
67.4	-0.03111	0.035259	0.053929	0.050542	-0.02391
67.6	-0.03098	0.036081	0.054724	0.051044	-0.02337
67.8	-0.03143	0.036371	0.054981	0.051157	-0.02313
68	-0.03162	0.036533	0.054957	0.050771	-0.0234
68.2	-0.03101	0.037427	0.055621	0.05131	-0.02293
68.4	-0.03094	0.037619	0.056221	0.051223	-0.02292
68.6	-0.03049	0.037771	0.056401	0.051745	-0.0229
68.8	-0.03085	0.037484	0.05585	0.051173	-0.02341
69	-0.03217	0.037082	0.055532	0.050802	-0.02406
69.2	-0.03201	0.037355	0.055696	0.051126	-0.02402
69.4	-0.03267	0.037212	0.055537	0.050696	-0.02446
69.6	-0.03242	0.037255	0.055507	0.050681	-0.02407
69.8	-0.03179	0.037753	0.055612	0.050735	-0.02374
70	-0.03145	0.038153	0.056097	0.051049	-0.02364
70.2	-0.0315	0.038211	0.055912	0.05073	-0.02404
70.4	-0.03099	0.038508	0.056144	0.051437	-0.02407
70.6	-0.03068	0.039245	0.056574	0.052377	-0.02388
70.8	-0.03089	0.039487	0.056828	0.053123	-0.02417
71	-0.0315	0.039372	0.05654	0.05308	-0.02438
71.2	-0.03224	0.039415	0.056546	0.053211	-0.02438
71.4	-0.03299	0.039231	0.056124	0.053041	-0.02503
71.6	-0.03299	0.039323	0.056634	0.053515	-0.02453
71.8	-0.03331	0.038418	0.056432	0.053459	-0.02516
72	-0.03297	0.038428	0.05666	0.053559	-0.02548
72.2	-0.03316	0.038596	0.056702	0.054018	-0.02541
72.4	-0.03264	0.038569	0.056986	0.054439	-0.02521
72.6	-0.03259	0.038015	0.056363	0.054778	-0.02546
72.8	-0.03336	0.037532	0.056314	0.054367	-0.02584
73	-0.0337	0.037408	0.056197	0.053907	-0.02639
73.2	-0.03303	0.038066	0.056421	0.053981	-0.02566
73.4	-0.03301	0.038593	0.056937	0.054455	-0.02547
73.6	-0.03215	0.038707	0.05761	0.054588	-0.02464
73.8	-0.03134	0.03938	0.058459	0.055086	-0.02399
74	-0.03125	0.039716	0.059581	0.056221	-0.02319
74.2	-0.03091	0.039988	0.059912	0.056935	-0.02261
74.4	-0.03113	0.040254	0.060324	0.057693	-0.02236
74.6	-0.0314	0.040101	0.060224	0.057586	-0.02238
74.8	-0.03173	0.040061	0.060409	0.058073	-0.02228
75	-0.03187	0.039779	0.060927	0.058425	-0.02216
75.2	-0.03166	0.03981	0.061389	0.058632	-0.02206
75.4	-0.03151	0.040289	0.061692	0.059184	-0.02174
75.6	-0.03148	0.040196	0.0621	0.059507	-0.02136
75.8	-0.03121	0.040674	0.06227	0.059589	-0.02157
76	-0.03083	0.041413	0.062379	0.06004	-0.02155
76.2	-0.03055	0.0415	0.062015	0.060212	-0.02173
76.4	-0.03006	0.041515	0.06194	0.060438	-0.02189
76.6	-0.03055	0.040907	0.061128	0.059881	-0.02271
76.8	-0.03055	0.041257	0.060879	0.05967	-0.02268
77	-0.03033	0.041708	0.060985	0.059474	-0.02269
77.2	-0.03006	0.042351	0.061093	0.059936	-0.02232
77.4	-0.03043	0.042808	0.06124	0.060039	-0.02228
77.6	-0.0305	0.042556	0.061079	0.059692	-0.02218
77.8	-0.03056	0.042561	0.061127	0.059716	-0.02211
78	-0.03103	0.042046	0.061385	0.059901	-0.02201
78.2	-0.03154	0.041584	0.0611	0.059063	-0.02214
78.4	-0.03217	0.041162	0.060632	0.058395	-0.02276
78.6	-0.03222	0.041004	0.060858	0.057916	-0.02291
78.8	-0.03295	0.040848	0.061118	0.057685	-0.02309
79	-0.03361	0.040356	0.061525	0.057497	-0.02347
79.2	-0.03392	0.040593	0.061645	0.057481	-0.02315
79.4	-0.03418	0.040918	0.061592	0.057466	-0.02329
79.6	-0.03496	0.040533	0.061252	0.05729	-0.02381
79.8	-0.03524	0.040726	0.061304	0.0581	-0.02381
80	-0.0351	0.040336	0.061092	0.05852	-0.0243
80.2	-0.03524	0.039757	0.061023	0.058422	-0.02458
80.4	-0.03563	0.039805	0.060927	0.058803	-0.02473
80.6	-0.03565	0.040417	0.061053	0.059279	-0.02433
80.8	-0.03537	0.040918	0.061592	0.059617	-0.02419
81	-0.03568	0.040853	0.062237	0.059574	-0.02436
81.2	-0.03591	0.041086	0.06236	0.059482	-0.02477
81.4	-0.03593	0.041084	0.062676	0.059213	-0.02482
81.6	-0.0361	0.040931	0.062991	0.059001	-0.02498
81.8	-0.03521	0.041589	0.063657	0.059405	-0.02452
82	-0.03449	0.041963	0.064134	0.059483	-0.02411
82.2	-0.03454	0.042157	0.064021	0.059139	-0.02389
82.4	-0.03408	0.042574	0.064388	0.059498	-0.02364
82.6	-0.03438	0.042711	0.064539	0.059498	-0.02335
82.8	-0.03485	0.04225	0.064239	0.059201	-0.02364
83	-0.0351	0.041738	0.064009	0.059034	-0.0237
83.2	-0.03515	0.041863	0.063808	0.058959	-0.0236
83.4	-0.03536	0.041671	0.063447	0.058378	-0.02417
83.6	-0.03564	0.041758	0.06367	0.059024	-0.02406
83.8	-0.03573	0.041882	0.06377	0.059592	-0.02355
84	-0.03583	0.041623	0.063775	0.059653	-0.02368
84.2	-0.03595	0.041648	0.064185	0.060351	-0.02327
84.4	-0.03624	0.04243	0.064567	0.061142	-0.02314
84.6	-0.03581	0.042839	0.065311	0.062433	-0.02239
84.8	-0.03598	0.042612	0.065532	0.062641	-0.02291
85	-0.03617	0.042771	0.06585	0.063169	-0.02299
85.2	-0.03639	0.042804	0.065624	0.06285	-0.02322
85.4	-0.03634	0.042876	0.06575	0.063376	-0.02304
85.6	-0.03636	0.043387	0.06596	0.063979	-0.02267
85.8	-0.0354	0.04417	0.066094	0.064974	-0.02196
86	-0.03563	0.043848	0.065866	0.065015	-0.02175
86.2	-0.0367	0.043511	0.065484	0.064791	-0.02209
86.4	-0.03706	0.043365	0.065633	0.064618	-0.02211
86.6	-0.03776	0.042981	0.065419	0.064302	-0.02224
86.8	-0.03809	0.042287	0.065015	0.06349	-0.02293
87	-0.03859	0.042622	0.065221	0.06266	-0.02318
87.2	-0.03874	0.043157	0.065523	0.062377	-0.02319
87.4	-0.03852	0.043672	0.065993	0.062029	-0.02333
87.6	-0.03812	0.044128	0.066599	0.062345	-0.02281
87.8	-0.03811	0.044353	0.066636	0.062088	-0.02255
88	-0.03835	0.044209	0.066746	0.061887	-0.02274
88.2	-0.03755	0.044842	0.067615	0.062599	-0.0221
88.4	-0.0377	0.045014	0.067907	0.062751	-0.02201
88.6	-0.03733	0.045211	0.068041	0.063351	-0.02158
88.8	-0.03724	0.045138	0.068224	0.062969	-0.02179
89	-0.03683	0.045475	0.068525	0.063797	-0.02174
89.2	-0.03702	0.045075	0.068393	0.064005	-0.02164
89.4	-0.03698	0.045339	0.068894	0.065335	-0.02149
89.6	-0.03744	0.045007	0.068757	0.065483	-0.02203
89.8	-0.03772	0.044952	0.068882	0.065708	-0.02213
90	-0.03812	0.044416	0.068914	0.065842	-0.02245
90.2	-0.03861	0.044163	0.069528	0.066198	-0.02253
90.4	-0.03832	0.044223	0.069784	0.066382	-0.02237
90.6	-0.03865	0.044063	0.069746	0.066863	-0.02223
90.8	-0.03853	0.044412	0.069636	0.066949	-0.02242
91	-0.03825	0.044887	0.069853	0.067104	-0.02249
91.2	-0.03801	0.0451	0.069876	0.06717	-0.02256
91.4	-0.03724	0.045516	0.070203	0.067388	-0.02251
91.6	-0.03698	0.045927	0.070262	0.067771	-0.02192
91.8	-0.03669	0.046384	0.070429	0.067281	-0.02194
92	-0.03585	0.046893	0.070798	0.067175	-0.02185
92.2	-0.03535	0.047812	0.071323	0.067649	-0.02151
92.4	-0.03563	0.047994	0.070927	0.067364	-0.0219
92.6	-0.03527	0.048069	0.070585	0.067504	-0.02181
92.8	-0.03568	0.047573	0.070336	0.066982	-0.02228
93	-0.03616	0.04744	0.070119	0.067529	-0.02273
93.2	-0.03665	0.047372	0.070528	0.067554	-0.02282
93.4	-0.03713	0.047367	0.070687	0.067303	-0.0233
93.6	-0.03761	0.046716	0.070456	0.066893	-0.02412
93.8	-0.03766	0.046453	0.070614	0.06737	-0.02405
94	-0.0381	0.045604	0.070386	0.067206	-0.02445
94.2	-0.03896	0.045285	0.070476	0.067358	-0.02464
94.4	-0.03881	0.045232	0.070522	0.067634	-0.02429
94.6	-0.0394	0.044867	0.070529	0.067872	-0.02401
94.8	-0.03916	0.045036	0.071184	0.068094	-0.02376
95	-0.03914	0.045065	0.071682	0.068221	-0.02346
95.2	-0.03892	0.045229	0.072429	0.06818	-0.02288
95.4	-0.03852	0.045389	0.072706	0.068862	-0.02258
95.6	-0.03859	0.046115	0.073229	0.06919	-0.02204
95.8	-0.03825	0.046823	0.073668	0.068838	-0.02168
96	-0.03812	0.047541	0.074175	0.068877	-0.02141
96.2	-0.03814	0.048194	0.07432	0.068999	-0.0212
96.4	-0.03799	0.048417	0.074394	0.069065	-0.02075
96.6	-0.03849	0.048262	0.073943	0.068804	-0.02076
96.8	-0.03903	0.048053	0.073987	0.068269	-0.02082
97	-0.0387	0.048382	0.074141	0.068678	-0.02089
97.2	-0.03873	0.048637	0.074363	0.068492	-0.02083
97.4	-0.03851	0.04918	0.074183	0.068782	-0.02086
97.6	-0.03844	0.049062	0.073961	0.068574	-0.02124
97.8	-0.03866	0.048657	0.07334	0.06885	-0.02169
98	-0.03948	0.048317	0.07337	0.068424	-0.02217
98.2	-0.03992	0.048848	0.073837	0.069058	-0.0222
98.4	-0.03947	0.048927	0.074368	0.069048	-0.02163
98.6	-0.03999	0.0487	0.074149	0.06881	-0.02223
98.8	-0.04047	0.048314	0.074378	0.068538	-0.02247
99	-0.04105	0.047914	0.074239	0.068695	-0.02285
99.2	-0.04066	0.048026	0.074313	0.069202	-0.02286
99.4	-0.04115	0.048149	0.074124	0.069719	-0.02315
99.6	-0.04139	0.048614	0.074567	0.069997	-0.02282
99.8	-0.04112	0.048767	0.07452	0.06995	-0.02266
100	-0.04082	0.049379	0.074994	0.07075	-0.02234
100.2	-0.04046	0.049562	0.075339	0.071047	-0.02214
100.4	-0.04036	0.049463	0.07565	0.071662	-0.02191
100.6	-0.04048	0.049064	0.075837	0.071596	-0.0221
100.8	-0.04043	0.048863	0.076001	0.071717	-0.02237
101	-0.04039	0.048948	0.075926	0.07176	-0.0227
101.2	-0.04058	0.048904	0.076505	0.071903	-0.02239
101.4	-0.04028	0.049017	0.07632	0.07191	-0.02245
101.6	-0.04075	0.048596	0.076454	0.071442	-0.02259
101.8	-0.04097	0.048402	0.076341	0.071481	-0.02297
102	-0.04153	0.048441	0.076999	0.071211	-0.02283
102.2	-0.0416	0.048651	0.077188	0.071288	-0.0228
102.4	-0.04171	0.048111	0.07683	0.071023	-0.02317
102.6	-0.04287	0.047227	0.076143	0.070737	-0.02416
102.8	-0.0432	0.046954	0.076087	0.070728	-0.02427
103	-0.04293	0.047493	0.076222	0.071419	-0.02412
103.2	-0.04227	0.048119	0.076511	0.072349	-0.02361
103.4	-0.04256	0.048314	0.076637	0.072557	-0.02353
103.6	-0.04185	0.048762	0.077201	0.073048	-0.02276
103.8	-0.04156	0.049111	0.077303	0.073519	-0.02247
104	-0.04193	0.049093	0.077205	0.073875	-0.02225
104.2	-0.04192	0.048601	0.077538	0.073769	-0.02201
104.4	-0.04194	0.048428	0.077704	0.073971	-0.02208
104.6	-0.04152	0.048561	0.078	0.074289	-0.02168
104.8	-0.04185	0.04875	0.077758	0.074207	-0.02215
105	-0.04229	0.048635	0.077751	0.074045	-0.02247
105.2	-0.04208	0.048653	0.078129	0.074021	-0.02245
105.4	-0.04235	0.048817	0.078202	0.073746	-0.02243
105.6	-0.04222	0.049584	0.078844	0.074215	-0.02184
105.8	-0.04168	0.050244	0.079352	0.074793	-0.02163
106	-0.04164	0.05079	0.079821	0.075162	-0.02118
106.2	-0.04175	0.050837	0.079567	0.075374	-0.02146
106.4	-0.04266	0.050058	0.07905	0.074907	-0.02243
106.6	-0.04325	0.049865	0.079303	0.074559	-0.02232
106.8	-0.04336	0.050034	0.079454	0.074589	-0.02218
107	-0.0434	0.050198	0.080088	0.07503	-0.02198
107.2	-0.04325	0.05014	0.080478	0.074946	-0.02157
107.4	-0.04351	0.050455	0.080548	0.074697	-0.02115
107.6	-0.0434	0.050846	0.080645	0.074799	-0.0208
107.8	-0.04438	0.050519	0.079606	0.07434	-0.02149
108	-0.04496	0.050237	0.079304	0.073819	-0.02202
108.2	-0.04543	0.050525	0.079139	0.073282	-0.02244
108.4	-0.0456	0.05097	0.078734	0.073215	-0.02311
108.6	-0.04521	0.051527	0.078738	0.073493	-0.02266
108.8	-0.04573	0.051452	0.078724	0.072878	-0.02329
109	-0.04588	0.051825	0.078856	0.072949	-0.02349
109.2	-0.04569	0.052101	0.078992	0.073268	-0.02317
109.4	-0.04627	0.052239	0.078508	0.073554	-0.0233
109.6	-0.04594	0.052715	0.078404	0.073998	-0.02299
109.8	-0.04582	0.05258	0.078534	0.074161	-0.02322
110	-0.04648	0.052002	0.077883	0.073512	-0.02371
110.2	-0.04696	0.051452	0.077572	0.073433	-0.02362
110.4	-0.04765	0.050676	0.077426	0.073123	-0.02386
110.6	-0.04721	0.050694	0.077982	0.073477	-0.02294
110.8	-0.04697	0.050514	0.077932	0.073706	-0.02326
111	-0.04673	0.050323	0.078423	0.073769	-0.0233
111.2	-0.04665	0.050056	0.07857	0.073076	-0.02309
111.4	-0.04646	0.050527	0.078641	0.073616	-0.02272
111.6	-0.04644	0.050684	0.078964	0.074068	-0.02289
111.8	-0.04628	0.050861	0.07923	0.074	-0.02307
112	-0.0456	0.051674	0.080148	0.074739	-0.02305
112.2	-0.04577	0.051803	0.080218	0.074799	-0.02326
112.4	-0.04533	0.051948	0.080787	0.075563	-0.02284
112.6	-0.04456	0.052671	0.082028	0.076457	-0.02175
112.8	-0.04477	0.052669	0.082599	0.076746	-0.02194
113	-0.04467	0.053058	0.08282	0.077238	-0.02201
113.2	-0.04471	0.053207	0.082891	0.077607	-0.0218
113.4	-0.04477	0.053244	0.083015	0.077914	-0.02177
113.6	-0.04447	0.053604	0.083905	0.078326	-0.02117
113.8	-0.04448	0.053518	0.083957	0.078879	-0.02074
114	-0.04469	0.053634	0.083755	0.078895	-0.02094
114.2	-0.04486	0.053515	0.083873	0.078918	-0.02102
114.4	-0.04523	0.053281	0.08381	0.07914	-0.02148
114.6	-0.04545	0.053437	0.083427	0.078949	-0.0214
114.8	-0.04563	0.053185	0.083004	0.078588	-0.02187
115	-0.04596	0.052851	0.082751	0.078187	-0.02198
115.2	-0.04632	0.052509	0.082841	0.078319	-0.02198
115.4	-0.04617	0.052882	0.082998	0.079085	-0.02124
115.6	-0.04658	0.052748	0.082935	0.079155	-0.02165
115.8	-0.0464	0.052746	0.082682	0.079543	-0.02138
116	-0.04677	0.052595	0.082278	0.079955	-0.02162
116.2	-0.04765	0.051677	0.082065	0.079621	-0.02233
116.4	-0.04776	0.052011	0.082291	0.080342	-0.02213
116.6	-0.04716	0.052657	0.083041	0.080472	-0.02222
116.8	-0.04731	0.052815	0.082712	0.080391	-0.02262
117	-0.04694	0.05338	0.08305	0.080719	-0.02209
117.2	-0.04692	0.053868	0.083732	0.081075	-0.02165
117.4	-0.04679	0.054074	0.084408	0.081183	-0.02172
117.6	-0.04683	0.054451	0.084781	0.081083	-0.02191
117.8	-0.04714	0.054708	0.084541	0.080668	-0.0221
118	-0.04706	0.054773	0.084751	0.080055	-0.02275
118.2	-0.0473	0.054889	0.085065	0.080155	-0.02247
118.4	-0.04735	0.055376	0.084995	0.080276	-0.02218
118.6	-0.04732	0.055579	0.084823	0.079901	-0.02186
118.8	-0.04722	0.055327	0.08513	0.079854	-0.02137
119	-0.04745	0.055064	0.085062	0.079977	-0.02089
119.2	-0.04777	0.054389	0.084845	0.080043	-0.02087
119.4	-0.04744	0.054631	0.084964	0.080149	-0.02031
119.6	-0.04743	0.054153	0.08434	0.080181	-0.0206
119.8	-0.04698	0.053879	0.084545	0.080908	-0.02007
120	-0.04732	0.053637	0.084501	0.081118	-0.02055
120.2	-0.04758	0.053035	0.084597	0.080891	-0.02093
120.4	-0.04693	0.053564	0.084954	0.080776	-0.02047
120.6	-0.04678	0.053907	0.085298	0.080626	-0.02064
120.8	-0.04718	0.053967	0.085403	0.081269	-0.02022
121	-0.04716	0.053998	0.085792	0.081363	-0.02025
121.2	-0.04779	0.053921	0.086019	0.081012	-0.02065
121.4	-0.04817	0.053657	0.086409	0.080475	-0.02113
121.6	-0.04887	0.053599	0.086203	0.080074	-0.0215
121.8	-0.04904	0.053971	0.086111	0.079853	-0.02141
122	-0.04931	0.053998	0.086162	0.079761	-0.02144
122.2	-0.04996	0.053999	0.086011	0.079679	-0.02156
122.4	-0.05059	0.053812	0.085942	0.079469	-0.02182
122.6	-0.05103	0.054059	0.086019	0.079603	-0.02183
122.8	-0.05149	0.054114	0.085795	0.079716	-0.02163
123	-0.05169	0.054577	0.085671	0.080016	-0.02174
123.2	-0.05151	0.054831	0.085749	0.080786	-0.02182
123.4	-0.05125	0.055353	0.08645	0.081431	-0.02161
123.6	-0.05113	0.055601	0.086481	0.081734	-0.02173
123.8	-0.05086	0.056265	0.087018	0.082309	-0.02144
124	-0.05142	0.055871	0.086502	0.081796	-0.02206
124.2	-0.05088	0.055568	0.086533	0.08167	-0.02189
124.4	-0.05023	0.055953	0.086738	0.082034	-0.02166
124.6	-0.05019	0.056136	0.087103	0.082718	-0.02174
124.8	-0.04984	0.055909	0.087341	0.08348	-0.02145
125	-0.04952	0.055682	0.087364	0.08342	-0.0215
125.2	-0.04998	0.055085	0.087611	0.083133	-0.02158
125.4	-0.05035	0.054423	0.08748	0.082731	-0.02197
125.6	-0.05005	0.054544	0.087445	0.082719	-0.02226
125.8	-0.04999	0.054588	0.087276	0.08239	-0.02222
126	-0.04995	0.054836	0.087566	0.0828	-0.02162
126.2	-0.04995	0.055043	0.087769	0.083318	-0.02129
126.4	-0.05012	0.055446	0.087933	0.083751	-0.02124
126.6	-0.05013	0.05573	0.087713	0.083859	-0.02121
126.8	-0.05057	0.055471	0.087695	0.083779	-0.02129
127	-0.05064	0.056065	0.087868	0.084036	-0.02127
127.2	-0.05045	0.056401	0.088268	0.084887	-0.02068
127.4	-0.05029	0.056453	0.088644	0.084948	-0.02065
127.6	-0.05079	0.0569	0.088373	0.084922	-0.02096
127.8	-0.0512	0.056537	0.088393	0.084907	-0.02109
128	-0.05164	0.056224	0.087763	0.084361	-0.02167
128.2	-0.05119	0.056233	0.087811	0.085041	-0.02155
128.4	-0.0512	0.055883	0.087733	0.085145	-0.02188
128.6	-0.05132	0.055827	0.088092	0.085199	-0.02202
128.8	-0.05162	0.055678	0.088129	0.085602	-0.02198
129	-0.05213	0.055352	0.088334	0.085726	-0.0222
129.2	-0.05253	0.055171	0.088639	0.085591	-0.02233
129.4	-0.05258	0.055476	0.088448	0.085498	-0.02279
129.6	-0.05205	0.056136	0.088916	0.08591	-0.02253
129.8	-0.05197	0.056537	0.088835	0.086047	-0.02196
130	-0.05178	0.056865	0.089373	0.086675	-0.02129
130.2	-0.05203	0.056598	0.089534	0.086785	-0.02136
130.4	-0.05209	0.05684	0.089605	0.086684	-0.02121
130.6	-0.05169	0.056638	0.090031	0.086364	-0.02138
130.8	-0.05178	0.056962	0.090338	0.086615	-0.0215
131	-0.05164	0.057475	0.090535	0.087152	-0.02162
131.2	-0.0521	0.057332	0.090666	0.087476	-0.02185
131.4	-0.05206	0.057301	0.090918	0.087683	-0.02224
131.6	-0.05277	0.057253	0.090541	0.087584	-0.02285
131.8	-0.05273	0.056917	0.090787	0.08734	-0.02269
132	-0.05276	0.056974	0.09067	0.087228	-0.02259
132.2	-0.05285	0.05691	0.091007	0.087788	-0.0223
132.4	-0.05281	0.056697	0.09125	0.08761	-0.02225
132.6	-0.05281	0.057099	0.091627	0.08803	-0.02207
132.8	-0.0524	0.057817	0.091783	0.088535	-0.02173
133	-0.0523	0.058409	0.092614	0.089062	-0.02113
133.2	-0.05241	0.058527	0.092504	0.088689	-0.02109
133.4	-0.05184	0.058983	0.092282	0.088674	-0.02094
133.6	-0.05128	0.059207	0.092712	0.08893	-0.01991
133.8	-0.05132	0.058475	0.09204	0.088312	-0.01994
134	-0.05172	0.057793	0.092526	0.088142	-0.01985
134.2	-0.05209	0.057484	0.092232	0.087844	-0.01979
134.4	-0.05202	0.057728	0.092529	0.087897	-0.01957
134.6	-0.05166	0.057831	0.092535	0.088011	-0.01996
134.8	-0.05224	0.057312	0.091981	0.088196	-0.02021
135	-0.0533	0.056421	0.091162	0.088	-0.02124
135.2	-0.05353	0.056262	0.09118	0.088187	-0.02132
135.4	-0.05391	0.055461	0.090597	0.087886	-0.02186
135.6	-0.05455	0.055459	0.090194	0.087562	-0.02184
135.8	-0.05493	0.055636	0.090592	0.08736	-0.02161
136	-0.05527	0.055898	0.090653	0.08789	-0.0219
136.2	-0.05566	0.056432	0.091075	0.088143	-0.02209
136.4	-0.05518	0.057129	0.091625	0.08852	-0.02182
136.6	-0.05551	0.057729	0.091858	0.088402	-0.02205
136.8	-0.05546	0.05903	0.092433	0.088936	-0.02151
137	-0.05611	0.058988	0.092827	0.0887	-0.02149
137.2	-0.05658	0.058786	0.092317	0.088753	-0.0217
137.4	-0.05593	0.05933	0.092876	0.089065	-0.02101
137.6	-0.0561	0.059487	0.093242	0.089077	-0.02087
137.8	-0.05702	0.058973	0.092555	0.088269	-0.02173
138	-0.05723	0.059222	0.09341	0.088536	-0.02157
138.2	-0.05711	0.059253	0.093577	0.089014	-0.02144
138.4	-0.05644	0.059479	0.093962	0.089567	-0.0215
138.6	-0.05613	0.059544	0.093922	0.089926	-0.02157
138.8	-0.05683	0.058569	0.093321	0.089483	-0.02213
139	-0.05683	0.058427	0.093005	0.089552	-0.0222
139.2	-0.05677	0.058537	0.093095	0.089708	-0.02201
139.4	-0.0573	0.057868	0.092449	0.089052	-0.02277
139.6	-0.0571	0.05873	0.092874	0.089505	-0.02217
139.8	-0.05714	0.058377	0.09328	0.089996	-0.02243
140	-0.05709	0.057964	0.093	0.090611	-0.02272
140.2	-0.0572	0.057831	0.093456	0.090461	-0.02222
140.4	-0.05668	0.05794	0.09366	0.090888	-0.02189
140.6	-0.05728	0.057867	0.093753	0.09056	-0.02205
140.8	-0.05706	0.057643	0.09414	0.091483	-0.02176
141	-0.05685	0.057492	0.094338	0.091445	-0.02216
141.2	-0.05711	0.057804	0.094933	0.09191	-0.0218
141.4	-0.05709	0.057899	0.095415	0.091632	-0.02182
141.6	-0.05755	0.057855	0.09583	0.091856	-0.02205
141.8	-0.05801	0.057624	0.096053	0.092208	-0.02223
142	-0.05805	0.057422	0.096913	0.0927	-0.02214
142.2	-0.05844	0.057203	0.097145	0.092766	-0.02222
142.4	-0.05826	0.057746	0.097253	0.092505	-0.02208
142.6	-0.05873	0.05784	0.097443	0.092275	-0.02225
142.8	-0.05946	0.05804	0.09672	0.091724	-0.02267
143	-0.05928	0.058085	0.096782	0.091546	-0.02264
143.2	-0.05954	0.058415	0.096639	0.09155	-0.0228
143.4	-0.05919	0.058684	0.096255	0.091224	-0.023
143.6	-0.05949	0.05873	0.095729	0.091186	-0.02276
143.8	-0.05959	0.058803	0.09524	0.091288	-0.02271
144	-0.05945	0.058922	0.09492	0.091404	-0.02254
144.2	-0.05878	0.059745	0.095564	0.09199	-0.02191
144.4	-0.05871	0.060068	0.095638	0.092679	-0.02198
144.6	-0.05875	0.06038	0.095847	0.09302	-0.02163
144.8	-0.05887	0.060581	0.096254	0.093584	-0.02153
145	-0.05887	0.061375	0.096616	0.093939	-0.02166
145.2	-0.05899	0.06156	0.096967	0.094396	-0.0214
145.4	-0.05912	0.061388	0.097058	0.094902	-0.02157
145.6	-0.05946	0.060982	0.097409	0.095487	-0.02148
145.8	-0.05933	0.06124	0.098109	0.096088	-0.02094
146	-0.05914	0.061016	0.098684	0.096277	-0.02049
146.2	-0.05937	0.060893	0.098847	0.096067	-0.02041
146.4	-0.05907	0.061264	0.099264	0.096035	-0.02064
146.6	-0.05936	0.060735	0.099238	0.096038	-0.02118
146.8	-0.05998	0.060082	0.0986	0.095547	-0.02159
147	-0.05965	0.05981	0.098741	0.095463	-0.02156
147.2	-0.05954	0.059985	0.098579	0.095335	-0.02148
147.4	-0.05908	0.060312	0.098694	0.095452	-0.02107
147.6	-0.05942	0.060072	0.0982	0.095377	-0.02137
147.8	-0.05922	0.060374	0.098645	0.095531	-0.02108
148	-0.05912	0.060246	0.099293	0.096252	-0.021
148.2	-0.05906	0.060687	0.100006	0.096895	-0.02041
148.4	-0.05966	0.060957	0.100079	0.09722	-0.02025
148.6	-0.05994	0.060988	0.100011	0.097439	-0.02036
148.8	-0.06015	0.061297	0.099947	0.097666	-0.02054
149	-0.05958	0.061776	0.10008	0.098001	-0.02048
149.2	-0.05942	0.062287	0.100295	0.098098	-0.02052
149.4	-0.06005	0.061816	0.100037	0.097578	-0.02103
149.6	-0.06007	0.06185	0.100621	0.097325	-0.02056
149.8	-0.05965	0.06258	0.101314	0.097458	-0.02013
150	-0.05962	0.061975	0.101031	0.097203	-0.02048
150.2	-0.06033	0.061413	0.100498	0.096255	-0.02143
150.4	-0.06029	0.061552	0.100519	0.096225	-0.02159
150.6	-0.06032	0.061131	0.100437	0.096264	-0.02144
150.8	-0.06112	0.06076	0.100054	0.095901	-0.02151
151	-0.06089	0.060903	0.100155	0.096305	-0.02101
151.2	-0.0609	0.060919	0.100241	0.096353	-0.0208
151.4	-0.0605	0.061148	0.100581	0.096952	-0.02038
151.6	-0.06096	0.06036	0.099843	0.096598	-0.02127
151.8	-0.061	0.060523	0.100427	0.097272	-0.02089
152	-0.06077	0.060659	0.10072	0.098409	-0.02042
152.2	-0.06067	0.061043	0.100763	0.098839	-0.02004
152.4	-0.06096	0.06093	0.10029	0.099455	-0.02021
152.6	-0.06081	0.060329	0.100118	0.099549	-0.0208
152.8	-0.06048	0.060315	0.100187	0.099517	-0.02085
153	-0.06014	0.060876	0.100481	0.0996	-0.02061
153.2	-0.06005	0.061004	0.100807	0.099152	-0.02109
153.4	-0.06018	0.061074	0.100614	0.099008	-0.02129
153.6	-0.06014	0.061195	0.101027	0.098722	-0.02138
153.8	-0.06029	0.061453	0.101168	0.098531	-0.02184
154	-0.06052	0.061202	0.101262	0.098371	-0.02212
154.2	-0.06119	0.061262	0.101129	0.097788	-0.0223
154.4	-0.06164	0.061705	0.101469	0.097709	-0.02225
154.6	-0.06166	0.062348	0.10196	0.097736	-0.02196
154.8	-0.06209	0.062938	0.102363	0.097854	-0.02154
155	-0.06182	0.06351	0.103101	0.098167	-0.02087
155.2	-0.06225	0.064265	0.103649	0.098469	-0.02073
155.4	-0.06241	0.064534	0.104036	0.098606	-0.02054
155.6	-0.06255	0.064705	0.103726	0.098689	-0.02049
155.8	-0.06229	0.065317	0.104149	0.099528	-0.01975
156	-0.06277	0.065145	0.103675	0.099824	-0.01977
156.2	-0.06325	0.064731	0.103051	0.099709	-0.02005
156.4	-0.06334	0.064107	0.102697	0.100031	-0.02015
156.6	-0.06316	0.06354	0.102502	0.100186	-0.02033
156.8	-0.06338	0.063018	0.102149	0.099927	-0.02072
157	-0.06305	0.062786	0.102132	0.100073	-0.02043
157.2	-0.06334	0.061815	0.101832	0.099207	-0.02133
157.4	-0.0636	0.061269	0.101259	0.099351	-0.02156
157.6	-0.0635	0.060619	0.101237	0.09909	-0.02232
157.8	-0.06359	0.060652	0.101324	0.099136	-0.02235
158	-0.06403	0.060047	0.100907	0.098938	-0.02285
158.2	-0.06431	0.059648	0.100373	0.098514	-0.02338
158.4	-0.06433	0.059762	0.100436	0.098372	-0.02342
158.6	-0.06408	0.060199	0.100826	0.098556	-0.02353
158.8	-0.06445	0.060458	0.101476	0.098902	-0.02325
159	-0.06501	0.060188	0.101427	0.09886	-0.02339
159.2	-0.06588	0.059998	0.101185	0.09894	-0.02386
159.4	-0.06571	0.060311	0.101254	0.098842	-0.02376
159.6	-0.06538	0.061212	0.101404	0.09935	-0.02336
159.8	-0.06592	0.061245	0.101387	0.099807	-0.02354
160	-0.06651	0.061296	0.10095	0.099822	-0.02392
160.2	-0.06645	0.061763	0.101317	0.100227	-0.02357
160.4	-0.06617	0.062446	0.101766	0.101009	-0.02276
160.6	-0.06631	0.062391	0.10197	0.100995	-0.02263
160.8	-0.0659	0.062635	0.102575	0.100582	-0.02266
161	-0.06547	0.062756	0.102847	0.100926	-0.0222
161.2	-0.06523	0.063222	0.103092	0.100981	-0.02213
161.4	-0.06448	0.063508	0.10337	0.101316	-0.02183
161.6	-0.06464	0.063718	0.103305	0.10123	-0.02236
161.8	-0.06494	0.063331	0.103141	0.101242	-0.02201
162	-0.06492	0.063034	0.103544	0.101482	-0.02178
162.2	-0.06518	0.062761	0.103932	0.101534	-0.02159
162.4	-0.06533	0.062296	0.103961	0.101516	-0.0214
162.6	-0.06562	0.062002	0.104192	0.10148	-0.02159
162.8	-0.0658	0.062043	0.104445	0.101797	-0.02142
163	-0.06647	0.060832	0.103537	0.101305	-0.02238
163.2	-0.06681	0.06071	0.103195	0.101281	-0.02264
163.4	-0.06656	0.061532	0.103548	0.101695	-0.02241
163.6	-0.06689	0.061583	0.103405	0.101752	-0.02259
163.8	-0.0676	0.061338	0.102975	0.101992	-0.0228
164	-0.06753	0.062066	0.102934	0.101896	-0.02272
164.2	-0.06701	0.063164	0.103466	0.102753	-0.02175
164.4	-0.06707	0.063329	0.103347	0.102579	-0.02181
164.6	-0.06673	0.063314	0.103377	0.102451	-0.02156
164.8	-0.06644	0.063701	0.103591	0.102706	-0.02123
165	-0.06632	0.064065	0.1037	0.103273	-0.02125
165.2	-0.06665	0.064115	0.104033	0.103182	-0.02115
165.4	-0.06644	0.064091	0.104138	0.103494	-0.02093
165.6	-0.06703	0.064175	0.104126	0.103753	-0.02081
165.8	-0.06606	0.064498	0.105337	0.104547	-0.01961
166	-0.0656	0.064729	0.106358	0.105124	-0.01884
166.2	-0.06563	0.064362	0.106398	0.105397	-0.01886
166.4	-0.0649	0.06411	0.106443	0.105392	-0.01888
166.6	-0.06486	0.064282	0.10653	0.105437	-0.01904
166.8	-0.06537	0.06422	0.106613	0.105716	-0.01931
167	-0.06598	0.063462	0.10635	0.105663	-0.01991
167.2	-0.06613	0.06357	0.106759	0.105787	-0.01998
167.4	-0.06616	0.063687	0.107356	0.106032	-0.02018
167.6	-0.06684	0.063579	0.107519	0.105996	-0.02052
167.8	-0.06712	0.063921	0.107728	0.106412	-0.02046
168	-0.06665	0.064336	0.108444	0.106523	-0.02027
168.2	-0.06604	0.064412	0.108701	0.106915	-0.01974
168.4	-0.0664	0.064311	0.108943	0.106567	-0.02028
168.6	-0.06622	0.064615	0.109335	0.107128	-0.01971
168.8	-0.0664	0.064503	0.109316	0.106729	-0.0201
169	-0.06613	0.064804	0.109674	0.106854	-0.02044
169.2	-0.06647	0.064412	0.109502	0.106813	-0.02025
169.4	-0.06618	0.064328	0.109374	0.107128	-0.01981
169.6	-0.06661	0.064134	0.108861	0.106306	-0.02012
169.8	-0.06625	0.06434	0.108921	0.10623	-0.02005
170	-0.06664	0.064213	0.108068	0.106049	-0.02024
170.2	-0.06642	0.064222	0.107725	0.106187	-0.02025
170.4	-0.06667	0.064151	0.107413	0.105991	-0.02036
170.6	-0.0675	0.064136	0.107	0.106017	-0.02058
170.8	-0.06837	0.064098	0.106649	0.106067	-0.02109
171	-0.06874	0.064164	0.106648	0.106397	-0.02114
171.2	-0.06916	0.064321	0.106583	0.106454	-0.02153
171.4	-0.06991	0.064305	0.106166	0.106282	-0.02184
171.6	-0.06942	0.065069	0.106779	0.106925	-0.02139
171.8	-0.06902	0.065582	0.107047	0.107377	-0.02099
172	-0.06906	0.065469	0.107044	0.107908	-0.02086
172.2	-0.06918	0.066053	0.107176	0.108629	-0.02067
172.4	-0.06979	0.066341	0.107539	0.108644	-0.02139
172.6	-0.06944	0.066621	0.107852	0.109226	-0.02119
172.8	-0.06936	0.066706	0.108271	0.108794	-0.02117
173	-0.06931	0.066562	0.108642	0.108652	-0.0213
173.2	-0.06959	0.065824	0.108455	0.107977	-0.02146
173.4	-0.06955	0.065264	0.108693	0.107244	-0.02179
173.6	-0.0695	0.06532	0.108706	0.106613	-0.02225
173.8	-0.06887	0.06557	0.109441	0.106981	-0.02199
174	-0.06863	0.065989	0.110031	0.107013	-0.02155
174.2	-0.06906	0.065909	0.110357	0.107069	-0.02116
174.4	-0.06962	0.065531	0.110198	0.106098	-0.02183
174.6	-0.07007	0.065276	0.109832	0.105657	-0.02232
174.8	-0.07069	0.065067	0.109325	0.105135	-0.02267
175	-0.07035	0.065306	0.109547	0.105654	-0.02208
175.2	-0.07092	0.064734	0.109092	0.105493	-0.02264
175.4	-0.07109	0.064554	0.10881	0.105454	-0.02267
175.6	-0.07059	0.065048	0.109325	0.106188	-0.02212
175.8	-0.07099	0.064925	0.109041	0.10668	-0.02227
176	-0.07168	0.064649	0.108643	0.107244	-0.02264
176.2	-0.07124	0.065564	0.109147	0.108057	-0.02212
176.4	-0.07116	0.065113	0.108816	0.107826	-0.02242
176.6	-0.07109	0.065076	0.10887	0.108111	-0.02195
176.8	-0.0713	0.06532	0.108993	0.108328	-0.02171
177	-0.07097	0.065251	0.10887	0.108464	-0.02213
177.2	-0.07066	0.065424	0.109294	0.108967	-0.02208
177.4	-0.07024	0.065476	0.10967	0.109052	-0.02204
177.6	-0.07023	0.065765	0.109967	0.109807	-0.02185
177.8	-0.07022	0.066207	0.110852	0.110405	-0.02126
178	-0.07073	0.06658	0.110698	0.110048	-0.02128
178.2	-0.07069	0.067076	0.110933	0.110646	-0.0209
178.4	-0.07032	0.06728	0.111318	0.110464	-0.02101
178.6	-0.07074	0.067212	0.111229	0.110456	-0.02088
178.8	-0.07065	0.067104	0.11134	0.110038	-0.0207
179	-0.07041	0.067434	0.111992	0.110801	-0.02027
179.2	-0.07135	0.066709	0.111928	0.110093	-0.0207
179.4	-0.07153	0.066687	0.112034	0.109684	-0.02048
179.6	-0.07111	0.066988	0.112459	0.109918	-0.02008
179.8	-0.07125	0.067228	0.112464	0.110246	-0.0201
180	-0.07145	0.067194	0.112619	0.109949	-0.01996
180.2	-0.07122	0.067041	0.112645	0.109813	-0.01971
180.4	-0.07194	0.066333	0.111745	0.109216	-0.02028
180.6	-0.07258	0.066368	0.111883	0.108995	-0.02031
180.8	-0.07245	0.066901	0.112182	0.109425	-0.02033
181	-0.07305	0.066531	0.111828	0.109111	-0.02104
181.2	-0.07386	0.066049	0.111572	0.108934	-0.02145
181.4	-0.07406	0.065494	0.111361	0.108793	-0.02192
181.6	-0.07467	0.065188	0.111089	0.109489	-0.02257
181.8	-0.07485	0.065198	0.111186	0.109545	-0.0225
182	-0.07486	0.06536	0.110817	0.110114	-0.0225
182.2	-0.0745	0.065902	0.111349	0.111123	-0.02222
182.4	-0.0747	0.066153	0.111425	0.110828	-0.02237
182.6	-0.07489	0.066117	0.111432	0.111095	-0.02279
182.8	-0.07449	0.066187	0.111589	0.111829	-0.02287
183	-0.07511	0.066015	0.111666	0.11214	-0.0227
183.2	-0.07518	0.065821	0.111431	0.111992	-0.02285
183.4	-0.07501	0.066485	0.111334	0.112297	-0.02245
183.6	-0.0744	0.067273	0.111618	0.113165	-0.02186
183.8	-0.07451	0.06766	0.11166	0.113679	-0.02157
184	-0.07458	0.067369	0.111799	0.113608	-0.02164
184.2	-0.07449	0.067565	0.111682	0.1138	-0.02127
184.4	-0.07412	0.068265	0.112212	0.1142	-0.02052
184.6	-0.0744	0.068328	0.112563	0.114056	-0.02043
184.8	-0.07454	0.068325	0.112482	0.11413	-0.02061
185	-0.07517	0.06776	0.112251	0.113544	-0.02108
185.2	-0.07507	0.067201	0.112319	0.113386	-0.02142
185.4	-0.07431	0.067541	0.112805	0.113692	-0.02129
185.6	-0.07387	0.06802	0.113096	0.113726	-0.02105
185.8	-0.07372	0.068053	0.113337	0.113566	-0.02039
186	-0.07371	0.06794	0.113751	0.113717	-0.02031
186.2	-0.07346	0.067669	0.114087	0.113538	-0.02041
186.4	-0.07374	0.067246	0.113839	0.112836	-0.02068
186.6	-0.07352	0.067105	0.114128	0.113275	-0.02071
186.8	-0.07345	0.067025	0.114009	0.11316	-0.02066
187	-0.07396	0.067082	0.113894	0.112411	-0.02077
187.2	-0.07365	0.067461	0.114226	0.112646	-0.02054
187.4	-0.07371	0.067758	0.114568	0.112641	-0.02002
187.6	-0.07403	0.067716	0.115191	0.11294	-0.01996
187.8	-0.0744	0.067684	0.115478	0.113114	-0.01988
188	-0.07556	0.067266	0.115626	0.112811	-0.02012
188.2	-0.07558	0.067528	0.115849	0.113272	-0.0195
188.4	-0.07596	0.067799	0.115945	0.113578	-0.01983
188.6	-0.07711	0.067298	0.115045	0.113325	-0.02072
188.8	-0.07705	0.067487	0.114998	0.113617	-0.02087
189	-0.07753	0.067472	0.114845	0.113303	-0.02147
189.2	-0.07759	0.067793	0.11482	0.11383	-0.02185
189.4	-0.07699	0.0688	0.115474	0.114756	-0.02107
189.6	-0.07709	0.068402	0.11547	0.114958	-0.02109
189.8	-0.07714	0.068147	0.115027	0.115296	-0.02123
190	-0.0771	0.067929	0.11563	0.115687	-0.02142
190.2	-0.0765	0.068022	0.115823	0.11625	-0.02129
190.4	-0.07639	0.068324	0.115669	0.116508	-0.02125
190.6	-0.07591	0.068902	0.115759	0.116878	-0.02092
190.8	-0.07561	0.068747	0.115669	0.116601	-0.02129
191	-0.07547	0.06907	0.116236	0.116866	-0.02142
191.2	-0.07533	0.06889	0.116419	0.117405	-0.02092
191.4	-0.07548	0.068561	0.116654	0.117333	-0.02105
191.6	-0.07625	0.067939	0.116411	0.116869	-0.02168
191.8	-0.07661	0.067506	0.116028	0.116519	-0.02128
192	-0.07777	0.066804	0.115603	0.115884	-0.02189
192.2	-0.07718	0.066993	0.115499	0.116477	-0.02186
192.4	-0.07781	0.066883	0.115041	0.116406	-0.0224
192.6	-0.07832	0.066408	0.114746	0.116351	-0.02241
192.8	-0.07839	0.066457	0.114678	0.116497	-0.02229
193	-0.07876	0.066485	0.1151	0.117054	-0.02244
193.2	-0.07902	0.066382	0.115366	0.117138	-0.02288
193.4	-0.07896	0.066333	0.115629	0.117723	-0.02228
193.6	-0.07878	0.066167	0.115433	0.117556	-0.02249
193.8	-0.07822	0.067043	0.115866	0.1179	-0.0222
194	-0.07791	0.067643	0.116892	0.1183	-0.02175
194.2	-0.07728	0.068154	0.117109	0.118814	-0.02108
194.4	-0.07703	0.069265	0.117564	0.119254	-0.0208
194.6	-0.07704	0.069475	0.117375	0.11874	-0.0209
194.8	-0.07629	0.06953	0.118155	0.119216	-0.02063
195	-0.07582	0.070332	0.118555	0.119602	-0.02015
195.2	-0.07626	0.069666	0.118278	0.119105	-0.02017
195.4	-0.07646	0.06956	0.118529	0.118873	-0.01982
195.6	-0.07626	0.069696	0.118823	0.118912	-0.01925
195.8	-0.07642	0.06985	0.118791	0.11857	-0.01895
196	-0.07685	0.069854	0.118571	0.118309	-0.01934
196.2	-0.07655	0.070189	0.118597	0.119095	-0.01909
196.4	-0.07754	0.069743	0.118037	0.119143	-0.01929
196.6	-0.07791	0.069388	0.117551	0.119123	-0.01972
196.8	-0.07814	0.069437	0.117112	0.118975	-0.02017
197	-0.07859	0.069327	0.116922	0.118866	-0.02054
197.2	-0.07929	0.068814	0.116406	0.117945	-0.02141
197.4	-0.07924	0.06857	0.115955	0.117984	-0.02165
197.6	-0.07869	0.068938	0.116262	0.118455	-0.02127
197.8	-0.07914	0.069039	0.116031	0.118203	-0.02175
198	-0.07945	0.068968	0.116324	0.118606	-0.02191
198.2	-0.0794	0.069495	0.116535	0.11896	-0.02209
198.4	-0.08013	0.070077	0.11685	0.118908	-0.02274
198.6	-0.08074	0.069542	0.11648	0.118229	-0.02311
198.8	-0.08008	0.069426	0.117055	0.118487	-0.02286
199	-0.08032	0.069951	0.117179	0.117947	-0.02314
199.2	-0.08059	0.069538	0.117794	0.118227	-0.02294
199.4	-0.08019	0.069773	0.11849	0.119278	-0.02199
199.6	-0.08014	0.069469	0.118783	0.119306	-0.02166
199.8	-0.08006	0.069277	0.118508	0.119138	-0.02189
200	-0.08014	0.069763	0.118631	0.119583	-0.02154
200.2	-0.08024	0.069429	0.118879	0.119947	-0.02128
200.4	-0.08087	0.068938	0.118596	0.119752	-0.02149
200.6	-0.08112	0.068764	0.118522	0.119654	-0.02175
200.8	-0.08099	0.06915	0.118602	0.119665	-0.02135
201	-0.08102	0.069154	0.118933	0.119838	-0.02139
201.2	-0.08046	0.068956	0.11944	0.119793	-0.02141
201.4	-0.07999	0.069353	0.119938	0.120242	-0.02092
201.6	-0.07946	0.070503	0.120902	0.121249	-0.01997
201.8	-0.07989	0.070529	0.120891	0.120632	-0.02062
202	-0.07985	0.071212	0.1217	0.121054	-0.02052
202.2	-0.07925	0.072058	0.121792	0.12126	-0.02026
202.4	-0.07949	0.072432	0.121858	0.121216	-0.02001
202.6	-0.079	0.072728	0.121773	0.121454	-0.01953
202.8	-0.07856	0.072732	0.121873	0.121551	-0.01923
203	-0.07855	0.072911	0.121853	0.121476	-0.01884
203.2	-0.07859	0.072047	0.121736	0.121567	-0.0185
203.4	-0.07906	0.071883	0.121735	0.121418	-0.01843
203.6	-0.07978	0.07149	0.120995	0.121077	-0.0188
203.8	-0.08004	0.071653	0.121091	0.121246	-0.01902
204	-0.08094	0.071823	0.120961	0.120934	-0.01889
204.2	-0.08202	0.070995	0.120602	0.120501	-0.01942
204.4	-0.08286	0.070665	0.120078	0.121082	-0.01986
204.6	-0.08341	0.070503	0.119967	0.121255	-0.02006
204.8	-0.08351	0.07041	0.120159	0.121178	-0.02
205	-0.08371	0.070053	0.120231	0.120981	-0.02059
205.2	-0.08341	0.070514	0.120751	0.120897	-0.02023
205.4	-0.084	0.070926	0.120785	0.121075	-0.02042
205.6	-0.08414	0.070988	0.120853	0.121433	-0.02064
205.8	-0.0843	0.070703	0.120546	0.121283	-0.02113
206	-0.08396	0.071279	0.121084	0.122027	-0.02053
206.2	-0.08354	0.071699	0.121165	0.123036	-0.0198
206.4	-0.08351	0.071853	0.121905	0.123469	-0.01928
206.6	-0.08354	0.071401	0.121443	0.123323	-0.01923
206.8	-0.08345	0.071056	0.121365	0.122947	-0.01917
207	-0.08306	0.071464	0.121809	0.123268	-0.01859
207.2	-0.083	0.071594	0.121658	0.123448	-0.0187
207.4	-0.08286	0.072435	0.122239	0.12425	-0.01849
207.6	-0.08284	0.072742	0.122352	0.124868	-0.01858
207.8	-0.08223	0.073587	0.123147	0.125492	-0.01807
208	-0.08228	0.073415	0.122599	0.125483	-0.01827
208.2	-0.08247	0.073169	0.122652	0.125712	-0.01862
208.4	-0.08217	0.072874	0.122634	0.12617	-0.0187
208.6	-0.08221	0.07248	0.122959	0.125681	-0.01888
208.8	-0.08263	0.07176	0.122635	0.125042	-0.01952
209	-0.08272	0.071713	0.122633	0.124739	-0.01979
209.2	-0.08292	0.071934	0.122575	0.124529	-0.01973
209.4	-0.08341	0.071503	0.122385	0.12479	-0.01994
209.6	-0.08317	0.07128	0.12273	0.125428	-0.01987
209.8	-0.0829	0.071576	0.123247	0.125726	-0.01978
210	-0.08326	0.071741	0.123815	0.126025	-0.01963
210.2	-0.08352	0.071234	0.123636	0.12624	-0.01958
210.4	-0.08365	0.071176	0.123824	0.126146	-0.01957
210.6	-0.08412	0.070908	0.123041	0.12577	-0.0199
210.8	-0.084	0.071041	0.122976	0.125737	-0.0199
211	-0.08336	0.071992	0.123867	0.126524	-0.0189
211.2	-0.08302	0.072601	0.124064	0.127175	-0.01838
211.4	-0.08286	0.073115	0.124778	0.127801	-0.01834
211.6	-0.08297	0.073423	0.125362	0.127955	-0.01842
211.8	-0.08313	0.073451	0.125181	0.127597	-0.01855
212	-0.08382	0.07281	0.1246	0.127123	-0.01904
212.2	-0.08398	0.072756	0.124659	0.126758	-0.01928
212.4	-0.08417	0.072533	0.124567	0.126509	-0.01938
212.6	-0.08498	0.072601	0.124785	0.126353	-0.01942
212.8	-0.08579	0.072334	0.124531	0.125905	-0.01972
213	-0.08584	0.072526	0.125097	0.126114	-0.01942
213.2	-0.0861	0.072344	0.124908	0.125988	-0.01981
213.4	-0.08631	0.072365	0.125111	0.126316	-0.02005
213.6	-0.08568	0.07273	0.125225	0.126178	-0.01999
213.8	-0.08569	0.073037	0.125562	0.126353	-0.0198
214	-0.08613	0.072625	0.125168	0.125978	-0.02011
214.2	-0.0862	0.072782	0.125299	0.12617	-0.01988
214.4	-0.08634	0.073344	0.125693	0.126187	-0.02001
214.6	-0.08657	0.072909	0.12518	0.125826	-0.02034
214.8	-0.08601	0.073303	0.125318	0.126109	-0.01988
215	-0.08527	0.074221	0.126516	0.127169	-0.01916
215.2	-0.08514	0.074373	0.126807	0.127534	-0.01931
215.4	-0.08516	0.074152	0.126875	0.127647	-0.0197
215.6	-0.08557	0.073876	0.126764	0.127678	-0.01974
215.8	-0.08589	0.073593	0.126411	0.127908	-0.01987
216	-0.0859	0.073241	0.126221	0.128282	-0.01982
216.2	-0.08603	0.072929	0.125998	0.128412	-0.01981
216.4	-0.08649	0.072852	0.126047	0.128549	-0.02008
216.6	-0.08687	0.073117	0.12655	0.129175	-0.01988
216.8	-0.08716	0.0726	0.126456	0.129108	-0.0203
217	-0.0875	0.072041	0.126127	0.129162	-0.02075
217.2	-0.08789	0.071992	0.125627	0.129138	-0.02102
217.4	-0.08774	0.072613	0.125932	0.129082	-0.0208
217.6	-0.08721	0.073235	0.126461	0.129285	-0.0203
217.8	-0.08787	0.073328	0.126859	0.129243	-0.02019
218	-0.08843	0.073296	0.126556	0.128408	-0.02084
218.2	-0.08864	0.07399	0.127155	0.128569	-0.02091
218.4	-0.0889	0.073829	0.127138	0.128205	-0.02089
218.6	-0.08878	0.073834	0.126811	0.127874	-0.02099
218.8	-0.08854	0.074108	0.127148	0.128216	-0.02058
219	-0.08902	0.073745	0.127012	0.127803	-0.0212
219.2	-0.08958	0.073025	0.126611	0.127212	-0.02137
219.4	-0.09018	0.072982	0.126363	0.127454	-0.02129
219.6	-0.09052	0.073035	0.126209	0.12764	-0.02143
219.8	-0.09063	0.072959	0.126397	0.128152	-0.02122
220	-0.09081	0.072778	0.126003	0.127921	-0.02145
220.2	-0.09085	0.072595	0.125889	0.128032	-0.02163
220.4	-0.09061	0.072924	0.126162	0.128365	-0.02178
220.6	-0.09058	0.073086	0.126612	0.128995	-0.02128
220.8	-0.09023	0.073062	0.12643	0.129022	-0.02122
221	-0.0907	0.073065	0.126053	0.12922	-0.02113
221.2	-0.09059	0.073859	0.126852	0.130066	-0.02012
221.4	-0.08954	0.074243	0.127714	0.13023	-0.01946
221.6	-0.08899	0.075032	0.128586	0.130802	-0.01858
221.8	-0.08915	0.075036	0.128714	0.130465	-0.01858
222	-0.0889	0.075636	0.129233	0.130942	-0.01838
222.2	-0.08864	0.075813	0.129859	0.1318	-0.01779
222.4	-0.08824	0.075909	0.130149	0.132154	-0.01724
222.6	-0.08816	0.075946	0.130333	0.132059	-0.01744
222.8	-0.08845	0.075505	0.129847	0.13244	-0.01769
223	-0.08927	0.075021	0.129357	0.132	-0.0185
223.2	-0.08959	0.075224	0.129578	0.132335	-0.01858
223.4	-0.09029	0.075228	0.129505	0.132393	-0.01943
223.6	-0.09026	0.075022	0.129452	0.132525	-0.0198
223.8	-0.09061	0.074607	0.129115	0.131979	-0.02027
224	-0.091	0.074239	0.128465	0.131053	-0.02088
224.2	-0.09164	0.073061	0.127963	0.130355	-0.02171
224.4	-0.09225	0.072838	0.127597	0.129716	-0.02186
224.6	-0.09288	0.072909	0.1273	0.129501	-0.02156
224.8	-0.09285	0.072659	0.127149	0.129247	-0.02137
225	-0.09347	0.07247	0.127319	0.129324	-0.02136
225.2	-0.09265	0.072787	0.128216	0.129798	-0.02063
225.4	-0.09236	0.072697	0.128164	0.129492	-0.02088
225.6	-0.09265	0.073188	0.128603	0.129891	-0.02051
225.8	-0.09287	0.073451	0.128615	0.130171	-0.02016
226	-0.09286	0.074177	0.129159	0.130791	-0.01961
226.2	-0.09282	0.074153	0.129289	0.131032	-0.01948
226.4	-0.09244	0.074838	0.129891	0.131216	-0.0189
226.6	-0.09272	0.074995	0.130064	0.131768	-0.01891
226.8	-0.09264	0.075297	0.129991	0.132119	-0.01903
227	-0.09294	0.075416	0.13016	0.131885	-0.01966
227.2	-0.0931	0.075505	0.130061	0.13197	-0.01981
227.4	-0.09326	0.075188	0.129937	0.131618	-0.02012
227.6	-0.09291	0.075454	0.12988	0.131528	-0.01983
227.8	-0.09322	0.07504	0.129275	0.130493	-0.02002
228	-0.09318	0.07491	0.129244	0.130341	-0.01967
228.2	-0.09337	0.074282	0.128675	0.130132	-0.02007
228.4	-0.09356	0.07453	0.128476	0.130181	-0.01978
228.6	-0.09347	0.074466	0.12833	0.130523	-0.01953
228.8	-0.09298	0.073788	0.128266	0.130931	-0.01969
229	-0.09311	0.073818	0.12848	0.131131	-0.02007
229.2	-0.09238	0.074076	0.128447	0.131686	-0.02011
229.4	-0.09313	0.074255	0.128203	0.131962	-0.02029
229.6	-0.09294	0.074735	0.128913	0.132899	-0.01968
229.8	-0.09268	0.075238	0.12932	0.133038	-0.01913
230	-0.09269	0.075142	0.129416	0.133219	-0.01936
230.2	-0.09229	0.075719	0.130178	0.133496	-0.01909
230.4	-0.09218	0.076165	0.130684	0.133793	-0.01895
230.6	-0.09254	0.076472	0.130869	0.134101	-0.01922
230.8	-0.09266	0.076714	0.130708	0.133572	-0.01966
231	-0.09346	0.076343	0.130449	0.133249	-0.02044
231.2	-0.09428	0.075927	0.130051	0.132539	-0.02077
231.4	-0.09486	0.075419	0.129908	0.13213	-0.02123
231.6	-0.09514	0.075329	0.130024	0.132198	-0.02145
231.8	-0.09544	0.074606	0.129697	0.131856	-0.02186
232	-0.09515	0.074555	0.13017	0.132113	-0.02162
232.2	-0.0957	0.073991	0.12931	0.131772	-0.02194
232.4	-0.09631	0.073437	0.129049	0.1316	-0.02195
232.6	-0.09592	0.073227	0.129251	0.132036	-0.02185
232.8	-0.09603	0.072866	0.129281	0.13239	-0.02219
233	-0.09604	0.073179	0.130137	0.132718	-0.02194
233.2	-0.09519	0.073538	0.13045	0.133738	-0.02152
233.4	-0.09552	0.073944	0.131063	0.134253	-0.02135
233.6	-0.0949	0.074484	0.131914	0.135072	-0.02061
233.8	-0.09472	0.074635	0.132125	0.13518	-0.02036
234	-0.09456	0.074928	0.132488	0.135714	-0.02051
234.2	-0.09423	0.075982	0.133184	0.135869	-0.02014
234.4	-0.09379	0.076328	0.133641	0.136196	-0.01994
234.6	-0.09386	0.076967	0.133583	0.136119	-0.01961
234.8	-0.09451	0.076974	0.133397	0.135753	-0.01963
235	-0.0955	0.076251	0.132626	0.135291	-0.02028
235.2	-0.09608	0.075625	0.132353	0.134847	-0.0206
235.4	-0.09644	0.07561	0.132282	0.135228	-0.02058
235.6	-0.09687	0.075622	0.132087	0.135626	-0.0207
235.8	-0.09684	0.075572	0.132044	0.13571	-0.02025
236	-0.09644	0.075968	0.132597	0.136112	-0.0197
236.2	-0.09658	0.075828	0.132105	0.136154	-0.01982
236.4	-0.09665	0.075615	0.132348	0.136503	-0.01987
236.6	-0.09702	0.075575	0.132612	0.136551	-0.0204
236.8	-0.0969	0.075529	0.133228	0.136946	-0.02028
237	-0.09696	0.07573	0.1335	0.137462	-0.02011
237.2	-0.09673	0.076009	0.133691	0.137915	-0.02038
237.4	-0.09695	0.076299	0.133944	0.137826	-0.02032
237.6	-0.0968	0.076745	0.134114	0.137878	-0.02003
237.8	-0.09628	0.076983	0.134371	0.137534	-0.01999
238	-0.09637	0.077341	0.134618	0.137443	-0.02009
238.2	-0.09646	0.077722	0.134429	0.137043	-0.01985
238.4	-0.09632	0.077389	0.1346	0.137125	-0.01964
238.6	-0.09721	0.076855	0.133684	0.136528	-0.01984
238.8	-0.09815	0.075904	0.133065	0.135835	-0.02049
239	-0.09803	0.075324	0.132479	0.13583	-0.02071
239.2	-0.09853	0.07479	0.132431	0.135328	-0.02107
239.4	-0.09844	0.074983	0.132316	0.135853	-0.02077
239.6	-0.09833	0.074454	0.132054	0.136227	-0.02096
239.8	-0.09765	0.074731	0.132572	0.136536	-0.02051
240	-0.09752	0.075165	0.132516	0.136912	-0.02081
240.2	-0.09793	0.074774	0.13247	0.136866	-0.02133
240.4	-0.09811	0.074518	0.132763	0.137164	-0.02153
240.6	-0.09825	0.075068	0.133449	0.137189	-0.02143
240.8	-0.09733	0.075603	0.13414	0.137951	-0.02083
241	-0.09707	0.076198	0.133963	0.138166	-0.02054
241.2	-0.09639	0.077461	0.134625	0.138528	-0.01964
241.4	-0.09614	0.077816	0.134736	0.138206	-0.01953
241.6	-0.09592	0.078837	0.13504	0.138439	-0.01897
241.8	-0.09582	0.079226	0.135159	0.138163	-0.01844
242	-0.0964	0.079405	0.134541	0.138206	-0.01819
242.2	-0.09657	0.079281	0.134361	0.138491	-0.01788
242.4	-0.09662	0.078698	0.134589	0.138811	-0.01784
242.6	-0.09677	0.078279	0.134411	0.138825	-0.01812
242.8	-0.09702	0.078084	0.134592	0.138782	-0.01877
243	-0.09669	0.078188	0.134963	0.139443	-0.01845
243.2	-0.09746	0.077603	0.134986	0.139335	-0.01897
243.4	-0.09743	0.077187	0.134966	0.139886	-0.01919
243.6	-0.09764	0.07623	0.134982	0.14008	-0.01981
243.8	-0.09834	0.075707	0.134875	0.139889	-0.02052
244	-0.0983	0.075356	0.134775	0.140165	-0.02094
244.2	-0.09878	0.074537	0.13487	0.139745	-0.02151
244.4	-0.0989	0.074106	0.134815	0.139827	-0.02181
244.6	-0.09852	0.074868	0.135431	0.139759	-0.02137
244.8	-0.09814	0.074916	0.135422	0.139981	-0.02097
245	-0.09791	0.075531	0.135632	0.140028	-0.02055
245.2	-0.0984	0.075729	0.135797	0.140096	-0.02023
245.4	-0.09862	0.075601	0.135686	0.139611	-0.0208
245.6	-0.09955	0.076053	0.135237	0.139653	-0.0204
245.8	-0.09962	0.076198	0.135173	0.13912	-0.02026
246	-0.09971	0.076376	0.134758	0.139199	-0.02011
246.2	-0.09969	0.076659	0.135319	0.139686	-0.01988
246.4	-0.09944	0.076949	0.135525	0.1398	-0.01998
246.6	-0.09916	0.0775	0.135417	0.139958	-0.0204
246.8	-0.09957	0.07801	0.135549	0.140112	-0.0207
247	-0.09984	0.078125	0.135675	0.140297	-0.0204
247.2	-0.10066	0.07771	0.135763	0.140134	-0.02091
247.4	-0.10036	0.077244	0.135817	0.140472	-0.02087
247.6	-0.10046	0.076671	0.136329	0.140574	-0.02081
247.8	-0.10061	0.07642	0.135905	0.140695	-0.02102
248	-0.10003	0.076559	0.136261	0.141283	-0.02082
248.2	-0.10077	0.076562	0.135925	0.14114	-0.02143
248.4	-0.10088	0.076933	0.136146	0.141761	-0.02125
248.6	-0.10071	0.077125	0.136787	0.142183	-0.02093
248.8	-0.1007	0.077326	0.137524	0.142852	-0.02024
249	-0.10083	0.077721	0.137696	0.142902	-0.02
249.2	-0.10109	0.077936	0.137876	0.143195	-0.01978
249.4	-0.1018	0.078066	0.137729	0.143073	-0.02006
249.6	-0.1025	0.078322	0.137908	0.142932	-0.01969
249.8	-0.10211	0.078832	0.138316	0.142839	-0.01929
250	-0.10219	0.079064	0.138027	0.143231	-0.01905
250.2	-0.10176	0.079173	0.13816	0.143109	-0.01908
250.4	-0.10111	0.079589	0.138084	0.143161	-0.01918
250.6	-0.10128	0.079868	0.137791	0.14317	-0.01943
250.8	-0.10156	0.080074	0.137905	0.143462	-0.01948
251	-0.10172	0.079798	0.137812	0.143371	-0.01951
251.2	-0.10106	0.079993	0.138551	0.143861	-0.01919
251.4	-0.1008	0.079957	0.138589	0.144128	-0.01918
251.6	-0.10148	0.079987	0.138542	0.144168	-0.0194
251.8	-0.10152	0.079666	0.138094	0.144012	-0.02008
252	-0.10137	0.079383	0.138346	0.143951	-0.02027
252.2	-0.10128	0.079301	0.137991	0.143775	-0.02033
252.4	-0.10137	0.078977	0.137903	0.143617	-0.02034
252.6	-0.10171	0.078536	0.137656	0.142986	-0.02055
252.8	-0.10165	0.078861	0.137672	0.142969	-0.02004
253	-0.10238	0.078488	0.13678	0.141983	-0.02012
253.2	-0.10225	0.078546	0.137138	0.141968	-0.01979
253.4	-0.10289	0.078212	0.13723	0.141359	-0.01978
253.6	-0.10277	0.078481	0.137834	0.141322	-0.0196
253.8	-0.10257	0.078449	0.13813	0.141532	-0.0195
254	-0.10261	0.078301	0.138347	0.141489	-0.01955
254.2	-0.10248	0.078481	0.138646	0.141387	-0.01989
254.4	-0.10293	0.079041	0.138926	0.141972	-0.02028
254.6	-0.1033	0.079047	0.139008	0.142484	-0.02064
254.8	-0.10357	0.078946	0.139202	0.142756	-0.02098
255	-0.10382	0.078638	0.139419	0.143052	-0.02126
255.2	-0.10357	0.07908	0.140296	0.143881	-0.02108
255.4	-0.10436	0.079253	0.140244	0.144031	-0.02175
255.6	-0.10467	0.079337	0.140275	0.144058	-0.02149
255.8	-0.10406	0.07913	0.14065	0.144045	-0.02122
256	-0.10357	0.079384	0.140654	0.144414	-0.02039
256.2	-0.10313	0.079871	0.140173	0.144656	-0.01982
256.4	-0.10322	0.079888	0.139682	0.144523	-0.01955
256.6	-0.10349	0.080032	0.139317	0.144549	-0.01912
256.8	-0.10316	0.080162	0.139303	0.145138	-0.01823
257	-0.10283	0.079755	0.138915	0.144487	-0.01826
257.2	-0.10221	0.080033	0.139386	0.144609	-0.0181
257.4	-0.1028	0.079573	0.139031	0.14443	-0.01841
257.6	-0.10315	0.079314	0.138537	0.144635	-0.01848
257.8	-0.10333	0.079172	0.138599	0.144848	-0.01854
258	-0.10392	0.079098	0.13821	0.14468	-0.0187
258.2	-0.10438	0.079094	0.13791	0.144773	-0.01895
258.4	-0.10508	0.078728	0.138016	0.145038	-0.01951
258.6	-0.10518	0.078633	0.138048	0.14538	-0.01945
258.8	-0.10587	0.078688	0.138259	0.145519	-0.0198
259	-0.10657	0.078621	0.138222	0.145439	-0.02032
259.2	-0.10641	0.079232	0.138775	0.146119	-0.01988
259.4	-0.10681	0.079488	0.138956	0.146294	-0.01983
259.6	-0.10642	0.080112	0.138969	0.146633	-0.01907
259.8	-0.10598	0.080596	0.139115	0.14691	-0.01885
260	-0.1057	0.081448	0.139559	0.147333	-0.01863
260.2	-0.10502	0.081797	0.139708	0.14746	-0.0186
260.4	-0.1045	0.081661	0.139989	0.147565	-0.01847
260.6	-0.10455	0.081679	0.140616	0.147528	-0.01858
260.8	-0.10394	0.081711	0.141	0.147326	-0.0188
261	-0.10406	0.080841	0.140663	0.14603	-0.01981
261.2	-0.10458	0.080228	0.14033	0.14529	-0.02031
261.4	-0.10539	0.079505	0.139754	0.144917	-0.02077
261.6	-0.1054	0.079239	0.139625	0.144643	-0.021
261.8	-0.10528	0.079476	0.140185	0.145156	-0.02064
262	-0.10566	0.079003	0.140237	0.144963	-0.02068
262.2	-0.10605	0.078725	0.140561	0.144706	-0.0206
262.4	-0.10664	0.078406	0.140923	0.144805	-0.02069
262.6	-0.10683	0.07885	0.141543	0.145124	-0.02051
262.8	-0.10784	0.078746	0.141709	0.14498	-0.02084
263	-0.1083	0.078488	0.141616	0.145255	-0.02082
263.2	-0.10785	0.078987	0.14218	0.146349	-0.02027
263.4	-0.10821	0.079034	0.142355	0.146902	-0.02019
263.6	-0.10755	0.080116	0.142543	0.148046	-0.0196
263.8	-0.10769	0.080391	0.142655	0.14838	-0.02026
264	-0.10729	0.081089	0.143311	0.148888	-0.02049
264.2	-0.10699	0.080963	0.142976	0.148667	-0.0207
264.4	-0.10674	0.08139	0.143291	0.148755	-0.02049
264.6	-0.10676	0.081771	0.143462	0.148624	-0.02055
264.8	-0.10675	0.08192	0.14327	0.148509	-0.02063
265	-0.10685	0.081582	0.142326	0.148543	-0.02092
265.2	-0.10696	0.081529	0.141787	0.148933	-0.02067
265.4	-0.10678	0.081919	0.141603	0.149338	-0.02041
265.6	-0.10657	0.081696	0.141224	0.149549	-0.01995
265.8	-0.1067	0.08121	0.141072	0.149626	-0.01965
266	-0.10652	0.080512	0.14105	0.149176	-0.01973
266.2	-0.10636	0.08039	0.141321	0.149011	-0.01948
266.4	-0.10658	0.080078	0.141684	0.148847	-0.01949
266.6	-0.10724	0.080033	0.14157	0.148218	-0.02005
266.8	-0.10805	0.079214	0.140864	0.146925	-0.02072
267	-0.10759	0.079215	0.141112	0.147127	-0.0207
267.2	-0.10737	0.079182	0.141356	0.147056	-0.0206
267.4	-0.10716	0.079169	0.141366	0.147094	-0.0208
267.6	-0.10703	0.07992	0.141386	0.14707	-0.02083
267.8	-0.10688	0.080233	0.142139	0.146892	-0.02099
268	-0.10624	0.080714	0.14271	0.147076	-0.02041
268.2	-0.10637	0.080792	0.142807	0.147321	-0.01997
268.4	-0.10605	0.081447	0.14347	0.147825	-0.01928
268.6	-0.10633	0.08168	0.143264	0.148415	-0.01914
268.8	-0.10657	0.08223	0.143067	0.149335	-0.01907
269	-0.10673	0.081829	0.142472	0.150214	-0.01879
269.2	-0.10726	0.081612	0.142076	0.150453	-0.01886
269.4	-0.10724	0.081527	0.142112	0.150681	-0.01873
269.6	-0.10736	0.080903	0.141993	0.151111	-0.01842
269.8	-0.10749	0.080469	0.141991	0.151349	-0.01835
270	-0.10798	0.080038	0.141834	0.151229	-0.01844
270.2	-0.10854	0.079845	0.142012	0.150943	-0.01866
270.4	-0.10967	0.079502	0.141786	0.150463	-0.01921
270.6	-0.11069	0.079307	0.141459	0.150185	-0.02004
270.8	-0.11062	0.079305	0.141741	0.150035	-0.02025
271	-0.11043	0.07953	0.142191	0.150048	-0.02056
271.2	-0.11057	0.079166	0.141941	0.149757	-0.02087
271.4	-0.11058	0.079643	0.142214	0.149915	-0.02106
271.6	-0.11023	0.080008	0.142973	0.149845	-0.02095
271.8	-0.11028	0.079787	0.143612	0.150192	-0.02088
272	-0.11018	0.080228	0.143945	0.1503	-0.02063
272.2	-0.11018	0.08032	0.144338	0.150507	-0.02072
272.4	-0.10988	0.081088	0.145177	0.151006	-0.02042
272.6	-0.10958	0.081481	0.145507	0.151439	-0.02047
272.8	-0.10979	0.081725	0.145361	0.151607	-0.02047
273	-0.10987	0.081204	0.145318	0.151601	-0.02024
273.2	-0.10998	0.081438	0.145088	0.151416	-0.02062
273.4	-0.10959	0.081497	0.145693	0.151896	-0.01985
273.6	-0.10913	0.081316	0.145299	0.151956	-0.01955
273.8	-0.10905	0.080938	0.145043	0.15215	-0.01902
274	-0.10893	0.081042	0.144868	0.151955	-0.01876
274.2	-0.10917	0.080684	0.144708	0.152132	-0.01879
274.4	-0.10929	0.080983	0.144902	0.153075	-0.01871
274.6	-0.10957	0.080986	0.144794	0.153584	-0.0188
274.8	-0.11	0.080744	0.144551	0.153229	-0.01887
275	-0.11055	0.080604	0.143821	0.152787	-0.01948
275.2	-0.11063	0.081307	0.143875	0.153415	-0.01916
275.4	-0.11062	0.081747	0.144202	0.153744	-0.01935
275.6	-0.11094	0.081552	0.14411	0.153409	-0.01969
275.8	-0.11191	0.081519	0.144258	0.153671	-0.01982
276	-0.11161	0.08253	0.14518	0.154005	-0.01938
276.2	-0.11134	0.082642	0.145557	0.154193	-0.01955
276.4	-0.11144	0.083065	0.146143	0.154363	-0.01935
276.6	-0.11156	0.083	0.146468	0.154356	-0.01955
276.8	-0.11236	0.082639	0.146086	0.153849	-0.02012
277	-0.11241	0.082371	0.146082	0.153489	-0.0204
277.2	-0.11262	0.082523	0.146065	0.153134	-0.02094
277.4	-0.11187	0.082161	0.146395	0.153556	-0.02061
277.6	-0.1112	0.082026	0.146022	0.153506	-0.02035
277.8	-0.11142	0.081638	0.145849	0.153704	-0.02007
278	-0.11143	0.081836	0.145707	0.15365	-0.01993
278.2	-0.11141	0.081442	0.145622	0.153977	-0.02007
278.4	-0.11094	0.082017	0.145912	0.154529	-0.01963
278.6	-0.11124	0.081653	0.145502	0.154566	-0.01956
278.8	-0.11143	0.081552	0.145519	0.15442	-0.01933
279	-0.11145	0.081996	0.145607	0.154817	-0.01932
279.2	-0.11131	0.082221	0.146053	0.155167	-0.01901
279.4	-0.11134	0.081793	0.145873	0.155276	-0.01911
279.6	-0.11177	0.08171	0.146078	0.155619	-0.01895
279.8	-0.11196	0.081889	0.146597	0.156072	-0.01878
280	-0.11204	0.082225	0.147034	0.156082	-0.01855
280.2	-0.11212	0.082137	0.147492	0.156028	-0.01853
280.4	-0.11242	0.082148	0.148255	0.156269	-0.01849
280.6	-0.11263	0.081804	0.148597	0.156357	-0.01911
280.8	-0.11326	0.081277	0.14821	0.156241	-0.01951
281	-0.11384	0.081227	0.148373	0.156438	-0.01972
281.2	-0.11431	0.081268	0.148324	0.156668	-0.02025
281.4	-0.11436	0.080597	0.14784	0.156362	-0.02046
281.6	-0.11487	0.08058	0.147333	0.156153	-0.02081
281.8	-0.11537	0.080908	0.14722	0.155952	-0.02084
282	-0.11473	0.081602	0.147614	0.156397	-0.02049
282.2	-0.11438	0.082282	0.147639	0.156458	-0.02038
282.4	-0.11452	0.082446	0.147052	0.156305	-0.02046
282.6	-0.11486	0.082065	0.146416	0.155867	-0.02039
282.8	-0.11537	0.082293	0.146267	0.155441	-0.02018
283	-0.11574	0.082386	0.145954	0.155622	-0.02043
283.2	-0.11546	0.082823	0.145995	0.15587	-0.02021
283.4	-0.11581	0.083101	0.145886	0.155646	-0.0201
283.6	-0.11599	0.083237	0.145989	0.155574	-0.01999
283.8	-0.11612	0.08315	0.146222	0.155109	-0.01982
284	-0.11601	0.083336	0.146656	0.155169	-0.01924
284.2	-0.11577	0.083421	0.147027	0.155156	-0.01872
284.4	-0.11553	0.083628	0.147357	0.155369	-0.01847
284.6	-0.11573	0.083238	0.147147	0.155308	-0.01872
284.8	-0.1166	0.083051	0.14703	0.155306	-0.01883
285	-0.11698	0.082815	0.1475	0.15499	-0.01903
285.2	-0.11689	0.082299	0.147228	0.154654	-0.01963
285.4	-0.11684	0.081793	0.147238	0.154278	-0.01974
285.6	-0.11731	0.081876	0.14758	0.154623	-0.02004
285.8	-0.11726	0.082152	0.14846	0.154965	-0.01974
286	-0.11695	0.082212	0.148771	0.155939	-0.01938
286.2	-0.11713	0.081808	0.148933	0.15596	-0.01937
286.4	-0.11702	0.081632	0.148768	0.156211	-0.01919
286.6	-0.11702	0.081264	0.149088	0.1564	-0.01903
286.8	-0.117	0.0819	0.149228	0.156952	-0.01933
287	-0.11676	0.081631	0.149323	0.157867	-0.01947
287.2	-0.11597	0.08219	0.149934	0.158303	-0.01908
287.4	-0.1162	0.081859	0.149607	0.158195	-0.01921
287.6	-0.1158	0.081603	0.149699	0.158209	-0.01891
287.8	-0.11579	0.081161	0.149325	0.15794	-0.01913
288	-0.11598	0.081388	0.148996	0.157766	-0.01921
288.2	-0.11571	0.081697	0.149081	0.157531	-0.01936
288.4	-0.11604	0.081824	0.148818	0.157437	-0.01972
288.6	-0.11667	0.082021	0.148385	0.156902	-0.01997
288.8	-0.117	0.08254	0.148418	0.156299	-0.02037
289	-0.11711	0.082703	0.14869	0.156412	-0.02053
289.2	-0.11718	0.082936	0.148349	0.156616	-0.02054
289.4	-0.11756	0.083282	0.14866	0.156765	-0.02004
289.6	-0.1181	0.083494	0.148968	0.157248	-0.01999
289.8	-0.11782	0.08382	0.149687	0.157706	-0.01926
290	-0.11796	0.084091	0.149675	0.157845	-0.019
290.2	-0.11778	0.08408	0.149874	0.157778	-0.01902
290.4	-0.11764	0.084515	0.149887	0.157833	-0.01902
290.6	-0.11771	0.084387	0.150061	0.158118	-0.01904
290.8	-0.11806	0.084853	0.150201	0.159084	-0.01895
291	-0.11838	0.084862	0.150525	0.159939	-0.01867
291.2	-0.11853	0.084836	0.150652	0.160039	-0.01876
291.4	-0.11938	0.084049	0.150272	0.159945	-0.01924
291.6	-0.11964	0.084057	0.150524	0.159835	-0.01914
291.8	-0.12015	0.083487	0.149838	0.159485	-0.01983
292	-0.12033	0.083687	0.150344	0.159963	-0.02008
292.2	-0.12023	0.083891	0.150208	0.160047	-0.02012
292.4	-0.12057	0.083662	0.149653	0.160068	-0.02011
292.6	-0.12069	0.08408	0.149408	0.160313	-0.02004
292.8	-0.12043	0.084498	0.149528	0.160474	-0.02019
293	-0.12015	0.084708	0.149477	0.16094	-0.02
293.2	-0.1198	0.08488	0.149505	0.160718	-0.01939
293.4	-0.11921	0.085109	0.149941	0.160699	-0.0188
293.6	-0.11918	0.084542	0.150046	0.160626	-0.01895
293.8	-0.11928	0.084406	0.150649	0.16041	-0.01864
294	-0.11956	0.084414	0.15051	0.16	-0.01835
294.2	-0.11922	0.084405	0.150802	0.159962	-0.01782
294.4	-0.11954	0.084282	0.150868	0.159928	-0.01777
294.6	-0.1201	0.084216	0.150643	0.159896	-0.01785
294.8	-0.12063	0.084197	0.150736	0.16033	-0.01798
295	-0.12064	0.084214	0.151217	0.160411	-0.01802
295.2	-0.1204	0.083829	0.151288	0.159853	-0.01812
295.4	-0.12048	0.083825	0.151597	0.160004	-0.01807
295.6	-0.12083	0.083965	0.151527	0.16019	-0.01768
295.8	-0.12128	0.08336	0.151315	0.160078	-0.01779
296	-0.12147	0.083765	0.151729	0.160596	-0.0177
296.2	-0.12183	0.083585	0.151262	0.160521	-0.01811
296.4	-0.12178	0.083732	0.151236	0.161122	-0.01807
296.6	-0.12229	0.08383	0.150843	0.161132	-0.01856
296.8	-0.12216	0.083934	0.151163	0.160639	-0.01909
297	-0.12252	0.083847	0.150973	0.160345	-0.01947
297.2	-0.12245	0.083684	0.15147	0.160079	-0.01937
297.4	-0.12261	0.083417	0.15145	0.159954	-0.01958
297.6	-0.12323	0.083033	0.151619	0.159575	-0.01983
297.8	-0.12349	0.08347	0.152013	0.159676	-0.01941
298	-0.12311	0.083499	0.151896	0.159563	-0.01904
298.2	-0.12285	0.083716	0.15176	0.159592	-0.01932
298.4	-0.12299	0.083682	0.151041	0.159646	-0.02008
298.6	-0.12222	0.084103	0.151237	0.159716	-0.01996
298.8	-0.12104	0.084727	0.151942	0.160626	-0.01954
299	-0.11947	0.085648	0.152679	0.161475	-0.01891
299.2	-0.11926	0.085864	0.152605	0.161709	-0.01898
299.4	-0.1194	0.085652	0.152701	0.162385	-0.01875
299.6	-0.11982	0.085149	0.152717	0.162558	-0.01866
299.8	-0.12001	0.084759	0.152823	0.163121	-0.01856
300	-0.1203	0.084459	0.153054	0.163179	-0.01865
300.2	-0.12077	0.083883	0.152648	0.163386	-0.01899
300.4	-0.12079	0.084007	0.152816	0.163776	-0.01852
300.6	-0.12148	0.083786	0.153158	0.164044	-0.01831
300.8	-0.12166	0.084025	0.153561	0.164253	-0.01818
301	-0.12257	0.08376	0.153276	0.163924	-0.0186
301.2	-0.12259	0.084011	0.153871	0.163971	-0.01823
301.4	-0.12318	0.083887	0.153306	0.163585	-0.01861
301.6	-0.12372	0.084185	0.153259	0.163309	-0.0186
301.8	-0.1242	0.084325	0.152905	0.163487	-0.01898
302	-0.1238	0.084175	0.152674	0.163224	-0.01926
302.2	-0.12426	0.084218	0.152183	0.162698	-0.01999
302.4	-0.12391	0.084395	0.15211	0.163197	-0.01995
302.6	-0.12235	0.085297	0.153171	0.164113	-0.01913
302.8	-0.12185	0.085474	0.153266	0.164555	-0.01928
303	-0.12183	0.085552	0.153364	0.164855	-0.01927
303.2	-0.12243	0.085339	0.15332	0.164952	-0.01968
303.4	-0.12225	0.084995	0.153609	0.165009	-0.01971
303.6	-0.1224	0.084536	0.153943	0.165114	-0.01987
303.8	-0.12192	0.084457	0.154444	0.165198	-0.01952
304	-0.12193	0.084154	0.154739	0.165306	-0.01926
304.2	-0.12177	0.084058	0.154966	0.166086	-0.01871
304.4	-0.12121	0.08462	0.156144	0.166962	-0.01785
304.6	-0.12131	0.084875	0.156552	0.167437	-0.01755
304.8	-0.12148	0.085057	0.15641	0.167527	-0.0175
305	-0.1221	0.084917	0.156347	0.167261	-0.01768
305.2	-0.12188	0.085497	0.156789	0.167637	-0.01708
305.4	-0.12155	0.086016	0.15652	0.167719	-0.01723
305.6	-0.12204	0.086122	0.156174	0.167373	-0.01765
305.8	-0.12215	0.085879	0.155558	0.167004	-0.01811
306	-0.12237	0.085379	0.154833	0.166307	-0.01869
306.2	-0.12271	0.085276	0.154399	0.165949	-0.0191
306.4	-0.12235	0.085659	0.154334	0.166384	-0.01872
306.6	-0.12212	0.085841	0.154498	0.166605	-0.01895
306.8	-0.12335	0.085367	0.153597	0.165623	-0.01973
307	-0.12346	0.085522	0.153933	0.165731	-0.01962
307.2	-0.12342	0.085725	0.153953	0.16579	-0.01994
307.4	-0.12353	0.085767	0.154497	0.16624	-0.02001
307.6	-0.12389	0.085745	0.154826	0.166173	-0.02029
307.8	-0.1242	0.085072	0.154972	0.166019	-0.02023
308	-0.12467	0.085127	0.155299	0.167185	-0.01994
308.2	-0.12524	0.084641	0.155751	0.167491	-0.01987
308.4	-0.12537	0.085049	0.156435	0.167962	-0.01973
308.6	-0.12581	0.085178	0.156419	0.168185	-0.01984
308.8	-0.12546	0.086105	0.157147	0.169068	-0.01915
309	-0.12541	0.086607	0.157503	0.169204	-0.01879
309.2	-0.12531	0.087014	0.157896	0.169513	-0.01854
309.4	-0.12486	0.087126	0.157902	0.169713	-0.01851
309.6	-0.12547	0.086917	0.157684	0.169546	-0.01861
309.8	-0.1259	0.08685	0.157391	0.169447	-0.01867
310	-0.12591	0.087021	0.157135	0.169376	-0.01891
310.2	-0.12552	0.087586	0.157094	0.169105	-0.01869
310.4	-0.12597	0.087778	0.157196	0.168852	-0.01865
310.6	-0.12642	0.087121	0.156718	0.168275	-0.01913
310.8	-0.12702	0.086547	0.156013	0.166959	-0.01932
311	-0.1266	0.086587	0.156308	0.166686	-0.01925
311.2	-0.1266	0.086606	0.156398	0.16672	-0.0194
311.4	-0.12689	0.086224	0.156569	0.166748	-0.01929
311.6	-0.12727	0.085617	0.156453	0.165809	-0.0196
311.8	-0.12736	0.084853	0.156338	0.165679	-0.01918
312	-0.12748	0.084968	0.156547	0.16588	-0.01934
312.2	-0.12796	0.084432	0.156325	0.165455	-0.01967
312.4	-0.12769	0.085204	0.156727	0.165966	-0.01953
312.6	-0.12719	0.085381	0.156644	0.166102	-0.01958
312.8	-0.12654	0.085901	0.15722	0.167016	-0.01886
313	-0.12653	0.086061	0.157044	0.167096	-0.0187
313.2	-0.12667	0.086071	0.157321	0.16775	-0.01852
313.4	-0.12636	0.086521	0.157968	0.168544	-0.01823
313.6	-0.12659	0.086931	0.15822	0.168912	-0.0182
313.8	-0.12673	0.08712	0.158359	0.169442	-0.01834
314	-0.12657	0.0868	0.15818	0.169664	-0.01846
314.2	-0.12723	0.086674	0.157866	0.169635	-0.0186
314.4	-0.12833	0.086429	0.15733	0.169456	-0.0188
314.6	-0.12815	0.086412	0.15691	0.169344	-0.01848
314.8	-0.12814	0.086643	0.157021	0.169682	-0.0183
315	-0.12795	0.086543	0.157233	0.169937	-0.01824
315.2	-0.12752	0.086446	0.157538	0.170578	-0.01764
315.4	-0.12815	0.085694	0.157228	0.170158	-0.01825
315.6	-0.12846	0.085476	0.156857	0.169673	-0.01867
315.8	-0.12877	0.085238	0.156291	0.170174	-0.01897
316	-0.1291	0.084969	0.156146	0.170029	-0.01953
316.2	-0.12954	0.085128	0.15635	0.169927	-0.01961
316.4	-0.12914	0.085693	0.156698	0.170261	-0.01965
316.6	-0.12845	0.086072	0.157004	0.170517	-0.01918
316.8	-0.12883	0.086558	0.157439	0.1706	-0.01894
317	-0.12848	0.087493	0.157781	0.170969	-0.01877
317.2	-0.12894	0.087407	0.158542	0.170691	-0.01882
317.4	-0.12861	0.088191	0.159203	0.170801	-0.01859
317.6	-0.12871	0.087766	0.159074	0.170363	-0.01856
317.8	-0.12926	0.087781	0.159168	0.17018	-0.01865
318	-0.12911	0.087604	0.159199	0.170176	-0.0187
318.2	-0.12948	0.088131	0.159205	0.170109	-0.01826
318.4	-0.12922	0.088398	0.159247	0.170204	-0.01797
318.6	-0.12852	0.088775	0.159612	0.170356	-0.01759
318.8	-0.12829	0.088802	0.160097	0.171071	-0.01772
319	-0.12854	0.088347	0.160108	0.170892	-0.01803
319.2	-0.12816	0.088764	0.160189	0.171183	-0.01816
319.4	-0.1291	0.087938	0.159725	0.170759	-0.01936
319.6	-0.1293	0.087876	0.159322	0.171313	-0.01959
319.8	-0.12915	0.088007	0.159052	0.171704	-0.02002
320	-0.12951	0.087647	0.15912	0.171364	-0.0203
320.2	-0.12981	0.08753	0.15915	0.171159	-0.0205
320.4	-0.12994	0.087525	0.159099	0.171122	-0.02049
320.6	-0.1304	0.087543	0.158984	0.170748	-0.01991
320.8	-0.13111	0.087776	0.158786	0.170806	-0.02015
321	-0.13121	0.087929	0.158765	0.171092	-0.02002
321.2	-0.13167	0.087363	0.158472	0.170529	-0.02028
321.4	-0.13106	0.087601	0.159078	0.171188	-0.0198
321.6	-0.13176	0.087179	0.159175	0.171315	-0.01943
321.8	-0.13188	0.087016	0.15939	0.171165	-0.0197
322	-0.13155	0.087185	0.160059	0.171714	-0.01923
322.2	-0.13145	0.086676	0.159803	0.171581	-0.0187
322.4	-0.13094	0.086795	0.160263	0.171958	-0.01854
322.6	-0.13058	0.086989	0.160636	0.17232	-0.01796
322.8	-0.13077	0.086616	0.160784	0.17284	-0.01841
323	-0.13157	0.086654	0.16048	0.172594	-0.0185
323.2	-0.13121	0.087218	0.160589	0.172884	-0.01827
323.4	-0.13168	0.086831	0.159987	0.172435	-0.01869
323.6	-0.13133	0.087515	0.160057	0.172893	-0.01855
323.8	-0.13071	0.088164	0.16002	0.172698	-0.01869
324	-0.1311	0.087696	0.159663	0.172521	-0.01876
324.2	-0.13114	0.087859	0.159632	0.172225	-0.01858
324.4	-0.1314	0.088258	0.159844	0.172343	-0.01789
324.6	-0.13173	0.088562	0.159671	0.172461	-0.01755
324.8	-0.13166	0.089333	0.159734	0.173231	-0.01785
325	-0.13183	0.089118	0.159713	0.173072	-0.01815
325.2	-0.13215	0.089149	0.159676	0.173008	-0.01842
325.4	-0.13251	0.089066	0.160314	0.173416	-0.0183
325.6	-0.13343	0.088533	0.159926	0.17322	-0.01826
325.8	-0.13286	0.088608	0.160131	0.173327	-0.01828
326	-0.13303	0.088301	0.160287	0.173888	-0.01794
326.2	-0.13269	0.087548	0.160178	0.174039	-0.01782
326.4	-0.13247	0.087952	0.160893	0.174464	-0.01737
326.6	-0.13329	0.087123	0.160697	0.174383	-0.01751
326.8	-0.13365	0.086983	0.160435	0.174203	-0.01803
327	-0.13384	0.087491	0.16025	0.174054	-0.01791
327.2	-0.13359	0.087672	0.160504	0.173975	-0.01777
327.4	-0.13333	0.087496	0.16037	0.173479	-0.01804
327.6	-0.13312	0.087422	0.160157	0.17327	-0.01803
327.8	-0.13318	0.08699	0.16011	0.173392	-0.018
328	-0.13361	0.0868	0.159841	0.173237	-0.01803
328.2	-0.1337	0.086681	0.16018	0.173298	-0.01814
328.4	-0.13416	0.086664	0.160219	0.173242	-0.01824
328.6	-0.13428	0.086932	0.16039	0.173146	-0.01855
328.8	-0.13456	0.087214	0.159976	0.172954	-0.01938
329	-0.13528	0.08697	0.159968	0.172775	-0.01981
329.2	-0.13573	0.087659	0.160206	0.173431	-0.01933
329.4	-0.13586	0.087787	0.160761	0.173952	-0.01916
329.6	-0.13607	0.087975	0.161054	0.174337	-0.01924
329.8	-0.13553	0.08838	0.161387	0.17516	-0.01945
330	-0.13564	0.088121	0.161921	0.175551	-0.01944
330.2	-0.13524	0.088297	0.162422	0.175926	-0.01911
330.4	-0.13527	0.088482	0.162424	0.176237	-0.01888
330.6	-0.13551	0.08775	0.162146	0.176094	-0.01921
330.8	-0.1347	0.088185	0.161869	0.176239	-0.01927
331	-0.13483	0.088194	0.16158	0.176484	-0.01917
331.2	-0.1348	0.088308	0.161688	0.17678	-0.01846
331.4	-0.13402	0.087671	0.161914	0.176476	-0.01803
331.6	-0.134	0.08735	0.161478	0.176547	-0.01783
331.8	-0.13344	0.087412	0.162217	0.177187	-0.01716
332	-0.13363	0.087504	0.161777	0.176621	-0.01749
332.2	-0.13336	0.0876	0.161941	0.176629	-0.01733
332.4	-0.13331	0.08794	0.161637	0.176642	-0.01734
332.6	-0.13272	0.08846	0.162252	0.177299	-0.01692
332.8	-0.13288	0.089122	0.162216	0.17762	-0.01691
333	-0.13275	0.08971	0.162772	0.178498	-0.01654
333.2	-0.13301	0.090345	0.16287	0.178927	-0.01647
333.4	-0.13322	0.090481	0.163222	0.178956	-0.01725
333.6	-0.13375	0.090408	0.163362	0.178674	-0.01775
333.8	-0.13375	0.090088	0.163363	0.178337	-0.01795
334	-0.13431	0.090094	0.163436	0.178106	-0.01787
334.2	-0.13474	0.089634	0.162836	0.177505	-0.0186
334.4	-0.1352	0.089183	0.162062	0.176997	-0.01927
334.6	-0.13537	0.088698	0.16202	0.176693	-0.01957
334.8	-0.13579	0.08875	0.161815	0.176453	-0.01985
335	-0.13666	0.088805	0.161925	0.176671	-0.01965
335.2	-0.13688	0.088942	0.162097	0.177017	-0.01934
335.4	-0.13637	0.088932	0.16236	0.177211	-0.01915
335.6	-0.13692	0.088984	0.16196	0.17761	-0.01941
335.8	-0.13704	0.088936	0.162417	0.177764	-0.01904
336	-0.13794	0.089039	0.161929	0.177614	-0.01955
336.2	-0.13808	0.089046	0.162134	0.177955	-0.01955
336.4	-0.13829	0.088698	0.162287	0.178241	-0.01961
336.6	-0.13797	0.089219	0.162808	0.179224	-0.01907
336.8	-0.13765	0.089684	0.163054	0.179664	-0.01894
337	-0.13741	0.089464	0.162805	0.17989	-0.01888
337.2	-0.13758	0.089643	0.162773	0.17964	-0.01888
337.4	-0.13732	0.089755	0.163168	0.179689	-0.01845
337.6	-0.13822	0.088974	0.162564	0.178453	-0.01834
337.8	-0.13827	0.088657	0.162163	0.178269	-0.01848
338	-0.1385	0.088768	0.161731	0.177648	-0.01876
338.2	-0.13867	0.088156	0.161349	0.176766	-0.01916
338.4	-0.13892	0.087821	0.161103	0.17665	-0.01927
338.6	-0.13933	0.087319	0.161386	0.176611	-0.01911
338.8	-0.13941	0.087624	0.16173	0.176646	-0.01903
339	-0.13962	0.087853	0.161573	0.17694	-0.01908
339.2	-0.13966	0.087826	0.161704	0.177441	-0.01898
339.4	-0.13929	0.088281	0.162312	0.178225	-0.01891
339.6	-0.13948	0.08823	0.162636	0.178185	-0.01914
339.8	-0.13922	0.088757	0.163477	0.178873	-0.01893
340	-0.13921	0.088756	0.163338	0.178926	-0.01929
340.2	-0.13955	0.088535	0.163302	0.179182	-0.01934
340.4	-0.13907	0.089103	0.163616	0.179955	-0.01887
340.6	-0.13866	0.0895	0.163661	0.180691	-0.01894
340.8	-0.13835	0.089774	0.163471	0.181013	-0.0191
341	-0.13828	0.089543	0.163219	0.181325	-0.01886
341.2	-0.13869	0.08991	0.163316	0.182138	-0.01856
341.4	-0.13914	0.089438	0.163248	0.181959	-0.01877
341.6	-0.14015	0.088775	0.162692	0.182052	-0.01925
341.8	-0.14075	0.088261	0.162218	0.181921	-0.01972
342	-0.14181	0.087959	0.161882	0.181445	-0.02009
342.2	-0.14238	0.087469	0.162072	0.181456	-0.01992
342.4	-0.14281	0.087254	0.162085	0.181435	-0.02
342.6	-0.14286	0.087377	0.162572	0.181437	-0.01978
342.8	-0.14281	0.087397	0.162545	0.181053	-0.01976
343	-0.14283	0.087187	0.162589	0.181115	-0.01957
343.2	-0.14314	0.087163	0.163277	0.18107	-0.01925
343.4	-0.14261	0.087955	0.163954	0.18133	-0.01883
343.6	-0.14203	0.088364	0.164355	0.18116	-0.01821
343.8	-0.14199	0.088575	0.164713	0.181059	-0.01825
344	-0.14222	0.08812	0.164459	0.180138	-0.0185
344.2	-0.14265	0.088266	0.164007	0.179901	-0.01871
344.4	-0.14225	0.088622	0.164222	0.179731	-0.01878
344.6	-0.14252	0.088314	0.163879	0.179392	-0.01914
344.8	-0.14238	0.088253	0.16343	0.179271	-0.01935
345	-0.14253	0.088289	0.163842	0.179455	-0.01904
345.2	-0.14304	0.088113	0.163869	0.179687	-0.01893
345.4	-0.14347	0.087505	0.163633	0.179023	-0.01963
345.6	-0.14438	0.086819	0.163103	0.179216	-0.02016
345.8	-0.14523	0.086271	0.162552	0.178547	-0.02067
346	-0.14518	0.08634	0.162791	0.178767	-0.02064
346.2	-0.14443	0.086944	0.163288	0.178997	-0.02034
346.4	-0.14442	0.086934	0.163208	0.179131	-0.02066
346.6	-0.14409	0.087432	0.163479	0.179902	-0.02035
346.8	-0.14368	0.087193	0.163493	0.180179	-0.02021
347	-0.14388	0.087261	0.163962	0.180502	-0.01987
347.2	-0.14436	0.087657	0.164018	0.180297	-0.01993
347.4	-0.14442	0.087895	0.163952	0.180464	-0.01994
347.6	-0.14443	0.088033	0.164213	0.180589	-0.01984
347.8	-0.14431	0.088413	0.164772	0.181003	-0.01994
348	-0.14452	0.088395	0.164819	0.181298	-0.01995
348.2	-0.1445	0.088558	0.164208	0.181868	-0.01988
348.4	-0.14443	0.088994	0.164731	0.182046	-0.01978
348.6	-0.14408	0.089476	0.164956	0.182681	-0.01933
348.8	-0.14385	0.089752	0.164866	0.182813	-0.01955
349	-0.14387	0.090403	0.165814	0.183602	-0.019
349.2	-0.14444	0.089853	0.165467	0.183906	-0.01927
349.4	-0.14438	0.089776	0.165134	0.184084	-0.01953
349.6	-0.14472	0.089455	0.164998	0.184098	-0.01962
349.8	-0.14452	0.089591	0.164686	0.183883	-0.01975
350	-0.14351	0.090056	0.165547	0.18433	-0.01926
350.2	-0.14327	0.09025	0.166088	0.184815	-0.01921
350.4	-0.14342	0.089459	0.165682	0.184841	-0.01945
350.6	-0.14345	0.089366	0.165677	0.18491	-0.01938
350.8	-0.14358	0.089178	0.165659	0.184413	-0.01968
351	-0.14462	0.08891	0.165329	0.183778	-0.01974
351.2	-0.14506	0.088905	0.1652	0.183764	-0.02
351.4	-0.14481	0.088976	0.165494	0.183716	-0.01998
351.6	-0.1446	0.089472	0.165996	0.183864	-0.0195
351.8	-0.14433	0.090021	0.166544	0.184635	-0.01876
352	-0.14498	0.089282	0.16603	0.18411	-0.01904
352.2	-0.14472	0.089297	0.165829	0.184098	-0.01877
352.4	-0.1445	0.090112	0.166507	0.183768	-0.01849
352.6	-0.14428	0.090496	0.166455	0.183758	-0.01849
352.8	-0.14473	0.090755	0.166231	0.183526	-0.01893
353	-0.14491	0.090843	0.166746	0.183686	-0.01906
353.2	-0.14521	0.090316	0.166176	0.183163	-0.01944
353.4	-0.14551	0.090244	0.165792	0.182401	-0.0195
353.6	-0.14571	0.090549	0.166252	0.182276	-0.01942
353.8	-0.14597	0.090336	0.165906	0.182032	-0.0195
354	-0.14567	0.090293	0.166342	0.182483	-0.01941
354.2	-0.14616	0.089444	0.166086	0.182581	-0.01973
354.4	-0.14657	0.089061	0.165942	0.182788	-0.02002
354.6	-0.14695	0.089127	0.166233	0.182919	-0.02007
354.8	-0.14738	0.088716	0.166062	0.18326	-0.02027
355	-0.14724	0.088675	0.166421	0.184102	-0.01962
355.2	-0.14735	0.088255	0.166436	0.184875	-0.01949
355.4	-0.14721	0.088309	0.166554	0.185324	-0.01918
355.6	-0.14764	0.08822	0.166402	0.185728	-0.01899
355.8	-0.14808	0.087635	0.165802	0.186222	-0.01877
356	-0.14816	0.087286	0.165467	0.186494	-0.0188
356.2	-0.14748	0.088129	0.165589	0.187031	-0.01815
356.4	-0.1474	0.088519	0.165392	0.186922	-0.0183
356.6	-0.1483	0.088155	0.165032	0.186279	-0.01913
356.8	-0.14856	0.088399	0.165339	0.186251	-0.01915
357	-0.1486	0.088411	0.165212	0.186079	-0.01948
357.2	-0.14865	0.088569	0.165155	0.185606	-0.01954
357.4	-0.14898	0.089189	0.165327	0.185227	-0.0193
357.6	-0.14882	0.089645	0.165864	0.185521	-0.01911
357.8	-0.14856	0.089714	0.165993	0.185309	-0.01899
358	-0.14779	0.090299	0.166745	0.185627	-0.01888
358.2	-0.14749	0.09067	0.167562	0.185892	-0.01849
358.4	-0.14729	0.091252	0.168097	0.186082	-0.01829
358.6	-0.14678	0.091662	0.168433	0.186146	-0.01805
358.8	-0.1464	0.091926	0.168756	0.186632	-0.01775
359	-0.14576	0.092609	0.169341	0.187239	-0.01702
359.2	-0.14581	0.0926	0.169289	0.187512	-0.01704
359.4	-0.14565	0.093158	0.169612	0.187891	-0.01684
359.6	-0.14558	0.093516	0.169564	0.188116	-0.01676
359.8	-0.14553	0.093602	0.169331	0.18845	-0.01645
360.01	-0.14553	0.093602	0.169331	0.18845	-0.01645
360.21	-0.14498	0.093581	0.168794	0.188326	-0.01681
360.41	-0.14406	0.09411	0.168675	0.188354	-0.01682
360.61	-0.14341	0.094041	0.168295	0.188086	-0.017
360.81	-0.14305	0.093859	0.167929	0.188014	-0.01729
361.01	-0.14228	0.093977	0.167473	0.187984	-0.01773
361.21	-0.14184	0.094076	0.166897	0.187563	-0.01849
361.41	-0.14123	0.093955	0.166296	0.18712	-0.0193
361.61	-0.14017	0.09406	0.166329	0.187243	-0.01978
361.81	-0.13944	0.094059	0.166114	0.186918	-0.02051
362.01	-0.13856	0.094405	0.166475	0.186806	-0.02071
362.21	-0.13818	0.094618	0.166538	0.186302	-0.02127
362.41	-0.13815	0.094671	0.166408	0.186262	-0.02111
362.61	-0.13774	0.094557	0.16582	0.186054	-0.02135
362.81	-0.13852	0.093573	0.165063	0.185235	-0.02232
363.01	-0.13841	0.093323	0.164629	0.1852	-0.02232
363.21	-0.13821	0.093923	0.164374	0.184808	-0.02251
363.41	-0.13793	0.093796	0.164362	0.184777	-0.02242
363.61	-0.13771	0.093278	0.163941	0.184436	-0.02271
363.81	-0.13745	0.093818	0.163961	0.184459	-0.02292
364.01	-0.13751	0.093823	0.164393	0.18448	-0.0229
364.21	-0.13715	0.093833	0.164866	0.184738	-0.02281
364.41	-0.13729	0.093942	0.165087	0.184861	-0.02289
364.61	-0.13769	0.093345	0.164797	0.184907	-0.02312
364.81	-0.13839	0.093288	0.164857	0.184835	-0.02347
365.01	-0.13795	0.093728	0.164906	0.185157	-0.02356
365.21	-0.13801	0.093992	0.165173	0.185338	-0.02368
365.41	-0.13763	0.094013	0.165369	0.185457	-0.02382
365.61	-0.13708	0.094233	0.165997	0.185636	-0.02383
365.81	-0.13707	0.094834	0.166373	0.185555	-0.02362
366.01	-0.13643	0.095394	0.16684	0.185931	-0.02276
366.21	-0.13651	0.095681	0.166569	0.185757	-0.02287
366.41	-0.1371	0.095485	0.16566	0.186033	-0.02303
366.61	-0.13737	0.095242	0.164995	0.185475	-0.02373
366.81	-0.13714	0.095087	0.164469	0.18552	-0.02377
367.01	-0.13674	0.095847	0.164633	0.185724	-0.02325
367.21	-0.13683	0.095958	0.164025	0.185248	-0.02331
367.41	-0.13636	0.095358	0.163742	0.185262	-0.0235
367.61	-0.13621	0.095145	0.163284	0.184424	-0.02395
367.81	-0.13615	0.095259	0.163043	0.184032	-0.02393
368.01	-0.13598	0.094623	0.162904	0.183747	-0.02411
368.21	-0.13621	0.094327	0.16232	0.183246	-0.02459
368.41	-0.13568	0.093923	0.161959	0.183094	-0.02477
368.61	-0.13582	0.093794	0.161559	0.182927	-0.02491
368.81	-0.13577	0.09336	0.161728	0.182522	-0.0252
369.01	-0.13497	0.093063	0.161698	0.182607	-0.02533
369.21	-0.13457	0.092497	0.161381	0.182325	-0.0259
369.41	-0.1341	0.092114	0.161301	0.18207	-0.02666
369.61	-0.13393	0.091921	0.161323	0.18179	-0.02722
369.81	-0.13354	0.092268	0.161523	0.182592	-0.02676
370.01	-0.13336	0.092246	0.161468	0.182346	-0.02705
370.21	-0.13359	0.092835	0.161617	0.182166	-0.02776
370.41	-0.13431	0.092497	0.160893	0.181656	-0.02894
370.61	-0.13394	0.093038	0.161191	0.181541	-0.02928
370.81	-0.13408	0.093554	0.161229	0.181273	-0.02928
371.01	-0.13448	0.094322	0.161799	0.181297	-0.0295
371.21	-0.13453	0.094015	0.161581	0.181633	-0.02947
371.41	-0.13431	0.094499	0.162133	0.181553	-0.0296
371.61	-0.13411	0.094736	0.162214	0.181179	-0.02957
371.81	-0.13417	0.094607	0.161916	0.18095	-0.02947
372.01	-0.13407	0.094418	0.161966	0.180822	-0.02947
372.21	-0.13399	0.094934	0.162178	0.18129	-0.02894
372.41	-0.13318	0.095237	0.162169	0.181698	-0.02847
372.61	-0.13338	0.095172	0.161836	0.181399	-0.02855
372.81	-0.13252	0.095087	0.16205	0.181522	-0.02845
373.01	-0.13177	0.094934	0.161887	0.181764	-0.02855
373.21	-0.13131	0.094548	0.161308	0.181816	-0.02861
373.41	-0.13114	0.094942	0.16131	0.182152	-0.02866
373.61	-0.13141	0.094078	0.160942	0.181587	-0.02923
373.81	-0.13111	0.094067	0.161222	0.181741	-0.02854
374.01	-0.13095	0.094458	0.16137	0.181428	-0.02871
374.21	-0.13037	0.094453	0.161541	0.181755	-0.02852
374.41	-0.1303	0.094051	0.1615	0.181786	-0.02885
374.61	-0.13001	0.093922	0.161532	0.181455	-0.02888
374.81	-0.13021	0.093772	0.161318	0.180902	-0.02928
375.01	-0.1298	0.094378	0.161709	0.181049	-0.02925
375.21	-0.12905	0.094864	0.162182	0.181451	-0.02909
375.41	-0.12911	0.094942	0.162014	0.180642	-0.02965
375.61	-0.12863	0.09498	0.161457	0.180665	-0.02978
375.81	-0.12893	0.095318	0.161218	0.180739	-0.0299
376.01	-0.12896	0.095607	0.161066	0.18077	-0.02993
376.21	-0.12824	0.096238	0.161195	0.181357	-0.02984
376.41	-0.12758	0.097184	0.161241	0.181555	-0.02983
376.61	-0.12745	0.097495	0.161337	0.181822	-0.02987
376.81	-0.12708	0.098098	0.16183	0.182458	-0.02981
377.01	-0.12673	0.097952	0.161619	0.182245	-0.03025
377.21	-0.12728	0.097849	0.161054	0.181703	-0.03059
377.41	-0.12763	0.09786	0.160785	0.181296	-0.03089
377.61	-0.12789	0.097147	0.16061	0.180587	-0.03123
377.81	-0.12758	0.097535	0.16104	0.181054	-0.03064
378.01	-0.12737	0.098074	0.16072	0.181714	-0.03046
378.21	-0.12706	0.097581	0.160571	0.181893	-0.03052
378.41	-0.12748	0.097422	0.160814	0.181708	-0.03112
378.61	-0.12776	0.097158	0.16049	0.181416	-0.03164
378.81	-0.12803	0.097245	0.160418	0.181623	-0.03184
379.01	-0.12772	0.097913	0.160479	0.181997	-0.03164
379.21	-0.12745	0.098488	0.160757	0.18265	-0.03169
379.41	-0.12773	0.098215	0.160452	0.182342	-0.03209
379.61	-0.1276	0.098834	0.160415	0.182944	-0.03173
379.81	-0.12825	0.098374	0.160414	0.18295	-0.03236
380.01	-0.12827	0.098316	0.160329	0.182846	-0.03282
380.21	-0.12794	0.098518	0.160884	0.182868	-0.03306
380.41	-0.12773	0.099007	0.161135	0.183161	-0.03317
380.61	-0.1277	0.098595	0.161574	0.182997	-0.0333
380.81	-0.12734	0.098977	0.161925	0.182903	-0.03343
381.01	-0.12702	0.099	0.161664	0.182063	-0.0337
381.21	-0.12663	0.099235	0.161763	0.181732	-0.03353
381.41	-0.12641	0.099434	0.16185	0.181357	-0.03364
381.61	-0.12594	0.099807	0.162255	0.180959	-0.03382
381.81	-0.12591	0.099909	0.161997	0.180854	-0.03412
382.01	-0.1255	0.100034	0.16154	0.180442	-0.03404
382.21	-0.1252	0.100002	0.161303	0.180289	-0.03393
382.41	-0.12513	0.100254	0.161542	0.180573	-0.03365
382.61	-0.1252	0.100189	0.161169	0.18094	-0.0334
382.81	-0.12516	0.099861	0.160991	0.180751	-0.03343
383.01	-0.12467	0.100043	0.160356	0.180831	-0.03354
383.21	-0.12474	0.100037	0.160428	0.181141	-0.03338
383.41	-0.12478	0.099882	0.160043	0.181029	-0.03361
383.61	-0.12459	0.099567	0.159438	0.180814	-0.03402
383.81	-0.12421	0.098999	0.159064	0.180703	-0.03453
384.01	-0.12415	0.099177	0.158904	0.18082	-0.03465
384.21	-0.12396	0.099561	0.158996	0.180692	-0.0347
384.41	-0.12376	0.099529	0.159198	0.180654	-0.03453
384.61	-0.12366	0.099779	0.159635	0.180745	-0.03447
384.81	-0.1232	0.100531	0.159942	0.181205	-0.03416
385.01	-0.12247	0.101325	0.160409	0.181013	-0.0338
385.21	-0.12187	0.101872	0.160812	0.181234	-0.03396
385.41	-0.12201	0.102229	0.161279	0.181	-0.03415
385.61	-0.12202	0.102281	0.161306	0.180343	-0.03427
385.81	-0.12237	0.102153	0.160749	0.180273	-0.03453
386.01	-0.12195	0.102339	0.161038	0.180543	-0.03398
386.21	-0.12178	0.102836	0.16131	0.181087	-0.03357
386.41	-0.12161	0.102781	0.16129	0.181332	-0.03396
386.61	-0.12199	0.102477	0.161036	0.181304	-0.03437
386.81	-0.12168	0.102281	0.161036	0.18136	-0.03476
387.01	-0.12134	0.102376	0.160737	0.181624	-0.0349
387.21	-0.12123	0.102382	0.160874	0.18179	-0.03508
387.41	-0.12075	0.10205	0.1604	0.181832	-0.0355
387.61	-0.12027	0.101794	0.160046	0.181813	-0.03618
387.81	-0.12025	0.101632	0.159585	0.181663	-0.03643
388.01	-0.12092	0.101172	0.159226	0.181021	-0.03735
388.21	-0.12108	0.101188	0.158987	0.180594	-0.03773
388.41	-0.12096	0.101091	0.159349	0.180915	-0.03766
388.61	-0.12063	0.101584	0.159403	0.181186	-0.03767
388.81	-0.12031	0.101299	0.15946	0.180744	-0.03767
389.01	-0.12002	0.101901	0.159504	0.181053	-0.03781
389.21	-0.12026	0.101614	0.159375	0.180875	-0.0379
389.41	-0.12008	0.101435	0.159384	0.180688	-0.03757
389.61	-0.12041	0.100519	0.158806	0.180559	-0.03763
389.81	-0.12045	0.100225	0.158943	0.181096	-0.03747
390.01	-0.12007	0.100258	0.158955	0.181313	-0.03725
390.21	-0.11943	0.100302	0.159292	0.181056	-0.03733
390.41	-0.11913	0.100691	0.159523	0.181493	-0.03701
390.61	-0.11947	0.100836	0.160077	0.181781	-0.03666
390.81	-0.11923	0.100626	0.159988	0.181763	-0.03717
391.01	-0.11886	0.100618	0.159993	0.181389	-0.03774
391.21	-0.11834	0.100974	0.160456	0.181949	-0.03766
391.41	-0.11813	0.101035	0.160345	0.181838	-0.03801
391.61	-0.11793	0.101223	0.160303	0.181219	-0.0386
391.81	-0.11763	0.101133	0.160124	0.180785	-0.03909
392.01	-0.11799	0.100948	0.159464	0.180013	-0.03995
392.21	-0.11743	0.101928	0.159579	0.180149	-0.03966
392.41	-0.11711	0.102929	0.160019	0.180495	-0.03941
392.61	-0.11667	0.103408	0.159941	0.180375	-0.03891
392.81	-0.11679	0.103009	0.159817	0.179894	-0.03926
393.01	-0.11677	0.103785	0.159844	0.180322	-0.03909
393.21	-0.11669	0.103849	0.159604	0.180025	-0.03849
393.41	-0.11661	0.103721	0.159302	0.180236	-0.03879
393.61	-0.11746	0.1032	0.158786	0.179869	-0.03929
393.81	-0.1173	0.103272	0.159273	0.179731	-0.03946
394.01	-0.11716	0.103156	0.15919	0.179205	-0.03964
394.21	-0.11688	0.103343	0.159495	0.178863	-0.0394
394.41	-0.11724	0.103483	0.1598	0.179223	-0.03938
394.61	-0.11745	0.103189	0.159546	0.178865	-0.03981
394.81	-0.11689	0.102986	0.159294	0.178537	-0.04063
395.01	-0.11643	0.102892	0.159363	0.178283	-0.04093
395.21	-0.11612	0.103509	0.160051	0.179189	-0.04023
395.41	-0.11586	0.103754	0.160222	0.178334	-0.04043
395.61	-0.11509	0.103772	0.160616	0.178536	-0.0403
395.81	-0.11469	0.104144	0.160811	0.179089	-0.04042
396.01	-0.11476	0.104583	0.160458	0.17884	-0.04047
396.21	-0.11352	0.105824	0.161904	0.179967	-0.03883
396.41	-0.1133	0.106253	0.162699	0.180363	-0.03827
396.61	-0.11264	0.105904	0.162659	0.180447	-0.03785
396.81	-0.1122	0.106659	0.163418	0.180924	-0.0379
397.01	-0.11206	0.106984	0.163731	0.181114	-0.03756
397.21	-0.11191	0.107189	0.16419	0.181309	-0.03749
397.41	-0.11186	0.107446	0.164242	0.181831	-0.03789
397.61	-0.11206	0.107015	0.163787	0.181545	-0.03794
397.81	-0.11171	0.107052	0.16386	0.181338	-0.03795
398.01	-0.11213	0.106886	0.163125	0.181107	-0.03825
398.21	-0.11231	0.106936	0.162675	0.180958	-0.03858
398.41	-0.11283	0.106453	0.162197	0.180873	-0.03923
398.61	-0.11296	0.105841	0.161231	0.180204	-0.0395
398.81	-0.11334	0.104988	0.160546	0.179877	-0.04025
399.01	-0.11386	0.10449	0.160189	0.179668	-0.04099
399.21	-0.11382	0.104927	0.160749	0.180091	-0.04065
399.41	-0.11382	0.104862	0.160661	0.17969	-0.04107
399.61	-0.11405	0.104149	0.16027	0.179716	-0.0412
[truncated: 1,601 more rows]

## Sheet: B (right)
time	20 uM	10 uM	5 uM	2.5 uM	1.25uM
0.03	-5.389e-05	0.00172905	-0.00269108	0.00106733	0.00253425
0.23	0.00013495	0.00221778	-0.00156417	0.00204215	0.00395813
0.43	0.0003816	0.00290757	-0.0004839	0.00291812	0.0051225
0.63	0.00071404	0.00345746	0.00038529	0.00341888	0.00613363
0.83	0.00064324	0.00373765	0.00133586	0.00414953	0.00715062
1.03	0.0005897	0.00379092	0.00228218	0.00457229	0.0079484
1.23	0.00085598	0.00417631	0.00309229	0.00488062	0.00878814
1.43	0.00068695	0.0045508	0.00335195	0.00502541	0.00878456
1.63	0.00113377	0.00483955	0.00350216	0.00567668	0.00912801
1.83	0.00126499	0.0054777	0.00379622	0.0059418	0.00896856
2.03	0.00180506	0.00572998	0.00377879	0.00599957	0.00856366
2.23	0.00233623	0.00587737	0.00378429	0.00592552	0.00797936
2.43	0.00344986	0.0064473	0.00432104	0.00680097	0.00785238
2.63	0.00426892	0.00729791	0.00501567	0.00695359	0.00745485
2.83	0.00505538	0.00778187	0.00565361	0.00732469	0.00745466
3.03	0.00597901	0.00853312	0.00642445	0.00787806	0.00773533
3.23	0.00657101	0.00901765	0.00712314	0.00813618	0.00815183
3.43	0.00799987	0.0101055	0.00819247	0.00887072	0.00908476
3.63	0.00894309	0.0105735	0.0089193	0.00946959	0.0096678
3.83	0.0108416	0.0113022	0.00993355	0.01036	0.0106182
4.03	0.0121084	0.0119669	0.0107595	0.0111114	0.0111974
4.23	0.0125505	0.0122567	0.0118151	0.0117971	0.0118214
4.43	0.0137472	0.013594	0.0130523	0.0127309	0.0124712
4.63	0.0146031	0.0139804	0.0137908	0.013153	0.0130792
4.83	0.0154386	0.0145891	0.0147836	0.0136904	0.0136236
5.03	0.0161162	0.0149485	0.0156798	0.0137096	0.0138047
5.23	0.0172394	0.0162536	0.0163511	0.0144026	0.0146321
5.43	0.0179847	0.0170966	0.0165711	0.014835	0.0147424
5.63	0.0196589	0.018017	0.0171812	0.0155983	0.0156209
5.83	0.0206406	0.01902	0.0182159	0.0161485	0.0159884
6.03	0.0218236	0.0194981	0.0183951	0.0159099	0.0162332
6.23	0.0228141	0.0204564	0.0191099	0.0162817	0.0168316
6.43	0.0233909	0.0211441	0.0190932	0.0165797	0.0168147
6.63	0.0237427	0.0217173	0.0189184	0.016221	0.0167155
6.83	0.0243501	0.022766	0.0190009	0.0167188	0.0170376
7.03	0.0251992	0.0237519	0.019313	0.0177549	0.0174374
7.23	0.0262774	0.024738	0.0199781	0.0187316	0.0179245
7.43	0.0274917	0.0255423	0.0204201	0.019058	0.0186425
7.63	0.0281605	0.0253302	0.0203461	0.0192085	0.018335
7.83	0.0295294	0.0261883	0.0211479	0.0199435	0.0183567
8.03	0.0298738	0.0265476	0.021481	0.0202159	0.0181163
8.23	0.031305	0.0271268	0.0222214	0.0208815	0.0187293
8.43	0.0325112	0.0282094	0.0229585	0.0215985	0.0191572
8.63	0.0335919	0.0287605	0.0233123	0.0215412	0.0192891
8.83	0.0353079	0.0297202	0.0241035	0.0218831	0.0195334
9.03	0.0364529	0.0306147	0.024916	0.0225459	0.0201223
9.23	0.0383368	0.0317508	0.0257449	0.0229679	0.0209771
9.43	0.0397791	0.0324044	0.02652	0.02333	0.0215933
9.63	0.0417563	0.0330808	0.0271028	0.0238315	0.0223895
9.83	0.0429629	0.0336494	0.0278846	0.0245257	0.023
10.03	0.0441057	0.0341999	0.028008	0.0239115	0.0231017
10.23	0.044906	0.0350455	0.0285465	0.024436	0.0237828
10.43	0.0452731	0.0355622	0.0283705	0.0244965	0.0238485
10.63	0.0459422	0.0362214	0.0287683	0.0245639	0.024335
10.83	0.0468714	0.0371728	0.0297948	0.0258248	0.0249303
11.03	0.0481173	0.0383495	0.0308511	0.0268865	0.0256082
11.23	0.0484698	0.0386973	0.0313054	0.0269809	0.0252422
11.43	0.0493698	0.0393021	0.0318127	0.027323	0.02591
11.63	0.0501932	0.0399545	0.0322666	0.0279784	0.0258797
11.83	0.0504159	0.0403263	0.0327467	0.0279844	0.0261204
12.03	0.0508086	0.0405025	0.0330012	0.0280448	0.0261215
12.23	0.0518747	0.041191	0.0335142	0.0285842	0.0261177
12.43	0.0522659	0.0420974	0.0342744	0.0289549	0.0257794
12.63	0.0530667	0.0426412	0.0347401	0.0295915	0.0258773
12.83	0.0540247	0.0426766	0.0354242	0.0299233	0.0259948
13.03	0.0548051	0.0433324	0.0363014	0.0303386	0.0261796
13.23	0.0559079	0.0434822	0.0366585	0.0304604	0.0262663
13.43	0.0567561	0.0442794	0.0373324	0.0311753	0.0264012
13.63	0.0584144	0.0449621	0.0380261	0.0315189	0.0265574
13.83	0.0592943	0.0456774	0.0390101	0.032163	0.0267658
14.03	0.0602051	0.0462881	0.039216	0.0319768	0.0266715
14.23	0.0609858	0.0471763	0.0398887	0.0324424	0.02733
14.43	0.0616991	0.0479065	0.0402365	0.0328266	0.02778
14.63	0.0627872	0.0487366	0.0411629	0.0334178	0.0286086
14.83	0.063844	0.0498294	0.0418815	0.0344336	0.0295706
15.03	0.0651488	0.0509135	0.0422843	0.0346714	0.0297621
15.23	0.0656154	0.0513074	0.0421385	0.0348436	0.0300536
15.43	0.067353	0.0528301	0.0427117	0.0359804	0.0314254
15.63	0.0679646	0.0535242	0.0425007	0.0358431	0.0311581
15.83	0.0683633	0.0536184	0.0425394	0.0357957	0.0311431
16.03	0.0690413	0.0541801	0.0425	0.0356365	0.0309258
16.23	0.0699122	0.0547371	0.043173	0.0359553	0.0309984
16.43	0.0704905	0.0550084	0.0438597	0.0363412	0.0311119
16.63	0.0708472	0.0550148	0.0441694	0.0363867	0.0309486
16.83	0.0716486	0.0558402	0.0451486	0.0366324	0.0311024
17.03	0.0723154	0.0566437	0.0455022	0.0368769	0.0308973
17.23	0.0728153	0.0573565	0.0456676	0.036833	0.0308677
17.43	0.0737384	0.0586056	0.0466922	0.0373531	0.0306997
17.63	0.0749096	0.0587089	0.0475411	0.0375797	0.0305233
17.83	0.0752586	0.0588821	0.0477169	0.0376782	0.0305841
18.03	0.0759458	0.0594695	0.0480366	0.0376844	0.0309217
18.23	0.0767389	0.060065	0.0490707	0.0381414	0.0317314
18.43	0.0771931	0.060616	0.049521	0.0386469	0.0327856
18.63	0.0782446	0.0611463	0.0506919	0.039283	0.0341296
18.83	0.0795704	0.0619316	0.0515691	0.0403967	0.0349052
19.03	0.0805695	0.0621898	0.0515053	0.0408659	0.0350596
19.23	0.0814599	0.0624451	0.0514032	0.0412112	0.0355859
19.43	0.0831505	0.0632562	0.0519427	0.0418562	0.0365268
19.63	0.0837437	0.0633947	0.052141	0.041816	0.0370635
19.83	0.0848361	0.063977	0.0528323	0.0424888	0.037979
20.03	0.086167	0.06518	0.0535562	0.0427631	0.0386164
20.23	0.0872333	0.0664814	0.054678	0.0437602	0.0391469
20.43	0.0882356	0.067053	0.0551743	0.0441534	0.0391401
20.63	0.088841	0.0678926	0.0556798	0.0445689	0.0392349
20.83	0.0897491	0.0691076	0.056299	0.0449633	0.0395197
21.03	0.0903497	0.0699526	0.0559617	0.0445571	0.0390017
21.23	0.0913764	0.0713066	0.0569188	0.044956	0.039379
21.43	0.092117	0.0718034	0.0571053	0.0448019	0.0388228
21.63	0.0933863	0.0719818	0.0576602	0.0446187	0.0388825
21.83	0.0942042	0.0728418	0.0581314	0.0447985	0.0393396
22.03	0.0949847	0.0730489	0.0585282	0.0448311	0.0392799
22.23	0.0959423	0.0737903	0.0593651	0.0452568	0.0397587
22.43	0.0966023	0.0738227	0.0594351	0.0450537	0.0401679
22.63	0.0975537	0.0742889	0.0604151	0.0454908	0.040367
22.83	0.0984018	0.0744791	0.0605325	0.0459383	0.0400253
23.03	0.0986534	0.074481	0.0606856	0.0458928	0.0401722
23.23	0.0995387	0.0747769	0.0616234	0.0460531	0.0408228
23.43	0.100925	0.0757776	0.0628843	0.0472469	0.0421714
23.63	0.101861	0.0765748	0.0635152	0.0484671	0.0429855
23.83	0.103364	0.0778692	0.064507	0.0496321	0.0434592
24.03	0.104514	0.0789147	0.0654324	0.050434	0.0440909
24.23	0.104638	0.0795052	0.0657839	0.0511463	0.0440299
24.43	0.105491	0.0796973	0.0662588	0.0516705	0.0442702
24.63	0.105848	0.0803267	0.0664313	0.0517742	0.0442488
24.83	0.106923	0.081062	0.066415	0.0518896	0.0443839
25.03	0.107595	0.0817542	0.0663926	0.0524402	0.0447363
25.23	0.107829	0.0820004	0.0664583	0.0522354	0.044636
25.43	0.108277	0.0816291	0.0658143	0.0515938	0.0440397
25.63	0.109593	0.0821169	0.0663751	0.0517496	0.0444164
25.83	0.110523	0.082565	0.0665658	0.0517364	0.0443019
26.03	0.110735	0.0826879	0.0666272	0.0516393	0.0441686
26.23	0.111369	0.0840151	0.0674904	0.0520428	0.0446687
26.43	0.111748	0.0838741	0.0673236	0.051569	0.0447193
26.63	0.112273	0.0848669	0.068576	0.0524006	0.0449253
26.83	0.112859	0.0855419	0.0691465	0.0527143	0.0451901
27.03	0.113516	0.0866909	0.0696785	0.0531588	0.0458853
27.23	0.114443	0.0871489	0.0700836	0.0536114	0.04667
27.43	0.115501	0.0880208	0.0706787	0.0544665	0.0470236
27.63	0.116937	0.0895747	0.0714091	0.0550889	0.047536
27.83	0.11783	0.0906989	0.0721485	0.0554711	0.0476726
28.03	0.11832	0.091013	0.0722115	0.0555209	0.0475843
28.23	0.118687	0.0915582	0.0727351	0.0556966	0.0476507
28.43	0.119232	0.0915384	0.0728684	0.055797	0.0474234
28.63	0.120176	0.0918188	0.0731064	0.0558774	0.0473116
28.83	0.120967	0.0913255	0.0732316	0.0565076	0.047635
29.03	0.121557	0.0915483	0.0738485	0.057199	0.0477793
29.23	0.122318	0.0913572	0.0734904	0.0570046	0.0471546
29.43	0.123462	0.091314	0.0739133	0.0574202	0.0473815
29.63	0.124745	0.0923226	0.075245	0.0580892	0.0483385
29.83	0.125826	0.0931786	0.0761689	0.0591946	0.0492263
30.03	0.125909	0.0933417	0.0765944	0.0598753	0.049491
30.23	0.126751	0.0938536	0.0775232	0.0603808	0.0501376
30.43	0.127978	0.0946979	0.0784291	0.0610277	0.0508889
30.63	0.129059	0.096327	0.0794995	0.0624115	0.0516665
30.83	0.130034	0.0971658	0.0794464	0.0625293	0.0522097
31.03	0.13144	0.0985875	0.0797332	0.0631434	0.0528858
31.23	0.132353	0.0995027	0.080363	0.063322	0.0532152
31.43	0.133533	0.100946	0.0810816	0.0636125	0.0534779
31.63	0.134758	0.102526	0.0816404	0.0635355	0.0539138
31.83	0.135222	0.103021	0.0817453	0.0631606	0.0534241
32.03	0.135755	0.103239	0.0815488	0.0625077	0.052908
32.23	0.135878	0.10367	0.0821901	0.0623116	0.0527975
32.43	0.136035	0.103384	0.0818974	0.0621487	0.0518814
32.63	0.137416	0.103698	0.0820814	0.0624633	0.0521869
32.83	0.137658	0.103476	0.0816507	0.0622407	0.0518084
33.03	0.138015	0.104016	0.0817927	0.0623921	0.0516051
33.23	0.138327	0.104015	0.0811247	0.0621608	0.0510261
33.43	0.138676	0.104345	0.0816484	0.0622625	0.0514703
33.63	0.139478	0.105032	0.0825228	0.0624415	0.0520716
33.83	0.139742	0.105365	0.0825543	0.0627653	0.0522678
34.03	0.139815	0.105541	0.0824891	0.0623053	0.0520403
34.23	0.140693	0.106341	0.0835894	0.0625427	0.052953
34.43	0.141871	0.107496	0.0843837	0.0629089	0.0537135
34.63	0.143077	0.10822	0.0848579	0.0635086	0.0544737
34.83	0.144429	0.109327	0.0859647	0.0642854	0.0552871
35.03	0.145864	0.110702	0.0871805	0.0655516	0.0560826
35.23	0.146718	0.11124	0.0876037	0.0657508	0.0560696
35.43	0.14833	0.112121	0.0886153	0.0666832	0.0566878
35.63	0.149588	0.112675	0.0892537	0.0670837	0.056826
35.83	0.150519	0.112849	0.0900912	0.0676163	0.0567573
36.03	0.151181	0.112828	0.0903181	0.0681782	0.0566369
36.23	0.152268	0.113038	0.0911606	0.0689287	0.0569759
36.43	0.153302	0.113269	0.091612	0.0696568	0.0575552
36.63	0.15419	0.113645	0.092039	0.0704099	0.0579144
36.83	0.154266	0.113412	0.0919857	0.0704118	0.0572858
37.03	0.154518	0.11381	0.0920024	0.0709436	0.057627
37.23	0.155636	0.114302	0.0923798	0.0712411	0.0577667
37.43	0.156462	0.114773	0.0928511	0.0715566	0.0582491
37.63	0.156701	0.115444	0.0930329	0.0714125	0.0578929
37.83	0.156877	0.116336	0.0933291	0.0721758	0.0582483
38.03	0.157012	0.116847	0.0934851	0.071904	0.0581554
38.23	0.158265	0.117359	0.0938166	0.0721918	0.0589174
38.43	0.15903	0.118139	0.0941435	0.072598	0.0596023
38.63	0.160082	0.119222	0.0948367	0.0732568	0.0603235
38.83	0.1609	0.1202	0.0955811	0.0740763	0.06063
39.03	0.161416	0.120686	0.0954703	0.0744837	0.0608113
39.23	0.16216	0.121358	0.0959633	0.0749142	0.0610479
39.43	0.163322	0.122368	0.0971518	0.0757826	0.0619912
39.63	0.164461	0.123007	0.0980711	0.0762986	0.0626354
39.83	0.164752	0.123305	0.0985086	0.0766368	0.0624833
40.03	0.165803	0.124399	0.0992371	0.0768381	0.0629542
40.23	0.167237	0.125182	0.100469	0.0772115	0.0638685
40.43	0.167525	0.125937	0.101175	0.0772366	0.0644513
40.63	0.16822	0.125885	0.10134	0.0774651	0.0645121
40.83	0.169133	0.126206	0.101436	0.077029	0.0645432
41.03	0.169996	0.126836	0.101805	0.0772352	0.0649934
41.23	0.170994	0.127091	0.102681	0.0774508	0.0647379
41.43	0.171847	0.127726	0.103123	0.077653	0.0648585
41.63	0.172609	0.128246	0.103646	0.0777521	0.0649473
41.83	0.173295	0.128343	0.10388	0.0779337	0.0651908
42.03	0.174487	0.128547	0.104126	0.0777683	0.0656579
42.23	0.176007	0.129655	0.104588	0.0778868	0.0664915
42.43	0.176195	0.129919	0.104561	0.077973	0.066364
42.63	0.176837	0.130301	0.104721	0.0777122	0.0660963
42.83	0.177126	0.13043	0.104848	0.0778314	0.0657865
43.03	0.177116	0.130717	0.104917	0.078282	0.0660777
43.23	0.17793	0.13165	0.105954	0.0793489	0.0665261
43.43	0.178812	0.132333	0.106491	0.0799669	0.0668254
43.63	0.179079	0.132926	0.106662	0.0808235	0.0672058
43.83	0.179546	0.13353	0.106967	0.0812123	0.0674451
44.03	0.180245	0.134692	0.107987	0.0815719	0.0677805
44.23	0.180794	0.134995	0.108532	0.0821743	0.0679112
44.43	0.181	0.135683	0.108982	0.0825469	0.0679836
44.63	0.181843	0.135728	0.109317	0.0829282	0.0680461
44.83	0.182699	0.137141	0.110265	0.0833584	0.0685802
45.03	0.183613	0.13762	0.111033	0.0840898	0.0688327
45.23	0.184328	0.138125	0.111822	0.084593	0.0691713
45.43	0.185629	0.139079	0.112717	0.0849235	0.0697881
45.63	0.186058	0.139305	0.113102	0.084681	0.0703242
45.83	0.186537	0.139463	0.113259	0.08457	0.0702508
46.03	0.187512	0.140264	0.11384	0.0850891	0.0706535
46.23	0.187921	0.140867	0.113825	0.0848534	0.0702205
46.43	0.187915	0.141102	0.113535	0.084741	0.0696723
46.63	0.188424	0.141508	0.113826	0.0846453	0.0698963
46.83	0.188829	0.142168	0.114416	0.0850999	0.070133
47.03	0.189177	0.143013	0.115123	0.0859259	0.0705037
47.23	0.190645	0.144226	0.116179	0.0868114	0.0711344
47.43	0.191124	0.144644	0.116094	0.0872251	0.0715148
47.63	0.191903	0.145502	0.116585	0.0877617	0.0720699
47.83	0.192873	0.146283	0.117431	0.0882818	0.0721796
48.03	0.193345	0.146692	0.117587	0.0886209	0.0718908
48.23	0.193828	0.147082	0.117692	0.0886132	0.0717675
48.43	0.194938	0.147924	0.11861	0.0892152	0.072542
48.63	0.19585	0.148463	0.119018	0.0894827	0.0728584
48.83	0.196781	0.149571	0.119725	0.0902627	0.0735366
49.03	0.197739	0.149792	0.120536	0.0905663	0.0738766
49.23	0.198625	0.150571	0.121097	0.0909875	0.0748044
49.43	0.199413	0.150711	0.121689	0.091205	0.0753501
49.63	0.199678	0.150593	0.121174	0.0906235	0.0754512
49.83	0.200631	0.151085	0.121641	0.0913939	0.0757955
50.03	0.201555	0.151343	0.122123	0.0917685	0.0761326
50.23	0.201967	0.151607	0.122319	0.091628	0.0760178
50.43	0.202212	0.151921	0.12267	0.0917997	0.076472
50.63	0.202502	0.152083	0.122953	0.0916864	0.0769299
50.83	0.203446	0.152934	0.123494	0.0921489	0.0772036
51.03	0.203984	0.15337	0.12404	0.0926094	0.0774435
51.23	0.204933	0.153702	0.124002	0.0928481	0.0774757
51.43	0.205082	0.153913	0.1239	0.0930476	0.0775217
51.63	0.205754	0.154333	0.124483	0.093182	0.0778362
51.83	0.205963	0.154623	0.124623	0.0934101	0.0774075
52.03	0.207098	0.155139	0.125418	0.0938918	0.0778385
52.23	0.20758	0.155364	0.125644	0.0936514	0.0775764
52.43	0.208447	0.156062	0.12649	0.0945014	0.0779608
52.63	0.209496	0.156897	0.127085	0.0949428	0.077841
52.83	0.210336	0.158035	0.128049	0.0959959	0.0785485
53.03	0.211417	0.158441	0.128737	0.0963294	0.079157
53.23	0.212357	0.159152	0.128914	0.0970986	0.0798259
53.43	0.213039	0.159225	0.129237	0.0974402	0.0799579
53.63	0.213636	0.159579	0.129164	0.0975924	0.0795446
53.83	0.214718	0.160757	0.130036	0.0984574	0.0803862
54.03	0.215593	0.161231	0.130173	0.0985483	0.0803378
54.23	0.215431	0.161416	0.130126	0.0986145	0.0801215
54.43	0.216039	0.161625	0.130501	0.0987491	0.080728
54.63	0.217117	0.162198	0.130535	0.0989104	0.0808588
54.83	0.218265	0.163033	0.131211	0.0997322	0.0812539
55.03	0.218765	0.163147	0.131213	0.0999586	0.0817834
55.23	0.219737	0.163797	0.131957	0.100115	0.082185
55.43	0.220489	0.164182	0.132538	0.100382	0.0827603
55.63	0.221655	0.164877	0.133325	0.100646	0.083155
55.83	0.221875	0.165559	0.133858	0.100943	0.0826949
56.03	0.222913	0.166697	0.134657	0.10156	0.0829991
56.23	0.223024	0.167217	0.13447	0.101681	0.082885
56.43	0.223125	0.168169	0.134985	0.102452	0.0831502
56.63	0.224036	0.169077	0.135906	0.102956	0.0834856
56.83	0.224628	0.169796	0.136664	0.10396	0.0838105
57.03	0.225089	0.169751	0.136737	0.103983	0.0835056
57.23	0.225482	0.170077	0.137464	0.104646	0.0835703
57.43	0.22602	0.170326	0.137629	0.104801	0.0833749
57.63	0.225597	0.170047	0.137258	0.10464	0.082809
57.83	0.226284	0.170763	0.137408	0.104529	0.083238
58.03	0.226532	0.170693	0.137524	0.104425	0.0835092
58.23	0.226511	0.170466	0.137896	0.104233	0.0836741
58.43	0.227527	0.171295	0.138768	0.104249	0.0842965
58.63	0.228719	0.172209	0.139517	0.104678	0.0851799
58.83	0.229576	0.172884	0.140454	0.105323	0.0860458
59.03	0.230659	0.172883	0.140323	0.104989	0.0867042
59.23	0.231857	0.173551	0.141088	0.105237	0.0868627
59.43	0.232726	0.174387	0.141237	0.105217	0.0870428
59.63	0.233428	0.175717	0.141705	0.105627	0.0876
59.83	0.233778	0.17725	0.141964	0.106161	0.0881038
60.03	0.234392	0.177864	0.141709	0.106397	0.0879469
60.23	0.234901	0.178452	0.142067	0.106952	0.0883868
60.43	0.235877	0.178832	0.14246	0.107554	0.0887912
60.63	0.236768	0.179166	0.143317	0.108028	0.0888118
60.83	0.237631	0.179519	0.143514	0.108859	0.0884524
61.03	0.23786	0.179375	0.143546	0.108654	0.0880398
61.23	0.238684	0.179366	0.144289	0.108847	0.0881641
61.43	0.239096	0.179383	0.144182	0.108836	0.0881168
61.63	0.239569	0.179479	0.144602	0.109215	0.0882389
61.83	0.240891	0.180466	0.145958	0.109735	0.0889448
62.03	0.241068	0.180751	0.146689	0.110049	0.0897421
62.23	0.241775	0.181403	0.147405	0.110452	0.089782
62.43	0.242281	0.181899	0.147952	0.110753	0.0901127
62.63	0.243099	0.182376	0.148712	0.111573	0.0906119
62.83	0.243835	0.182698	0.149142	0.112429	0.0906031
63.03	0.244579	0.183184	0.149381	0.112348	0.0907813
63.23	0.24509	0.184022	0.149779	0.113157	0.0909935
63.43	0.245743	0.185119	0.150357	0.113851	0.0914734
63.63	0.246423	0.186227	0.150613	0.115103	0.0922046
63.83	0.247181	0.186968	0.151045	0.115571	0.0922018
64.03	0.247273	0.187207	0.151217	0.115926	0.0921014
64.23	0.248326	0.187842	0.152088	0.11632	0.0926549
64.43	0.249148	0.187875	0.152078	0.116694	0.0931193
64.63	0.249936	0.188189	0.152528	0.116784	0.0929316
64.83	0.250708	0.188927	0.152787	0.11697	0.0930766
65.03	0.251239	0.189352	0.153426	0.116946	0.0936645
65.23	0.2522	0.189913	0.154339	0.117109	0.0942897
65.43	0.252699	0.190274	0.154527	0.117275	0.0947101
65.63	0.253693	0.190952	0.155159	0.117826	0.0951277
65.83	0.254407	0.191255	0.155411	0.1181	0.0956105
66.03	0.255467	0.191232	0.155446	0.118351	0.0960571
66.23	0.256322	0.191637	0.155489	0.118775	0.0958891
66.43	0.256688	0.191887	0.155799	0.119602	0.0962274
66.63	0.257319	0.19261	0.156469	0.120166	0.0961517
66.83	0.257899	0.193123	0.156667	0.120697	0.0961419
67.03	0.258598	0.193465	0.157	0.120923	0.0962967
67.23	0.25903	0.193812	0.156974	0.120851	0.0961374
67.43	0.259812	0.194594	0.157297	0.121035	0.0964421
67.63	0.2598	0.195055	0.157576	0.120718	0.0965303
67.83	0.260555	0.196159	0.158506	0.120761	0.0969969
68.03	0.260747	0.196784	0.158988	0.120786	0.0976365
68.23	0.261353	0.196937	0.159552	0.120637	0.0977212
68.43	0.26172	0.197618	0.159805	0.120969	0.0984896
68.63	0.262366	0.198736	0.160676	0.121275	0.0992666
68.83	0.262632	0.199769	0.161508	0.122011	0.100316
69.03	0.26298	0.200193	0.162335	0.122346	0.10087
69.23	0.263858	0.20046	0.162802	0.122533	0.101299
69.43	0.264097	0.200427	0.162699	0.122423	0.101156
69.63	0.26459	0.200516	0.162939	0.122808	0.101085
69.83	0.265555	0.200945	0.163446	0.123737	0.101541
70.03	0.26641	0.201684	0.164176	0.124344	0.101947
70.23	0.266583	0.202053	0.16456	0.124824	0.101858
70.43	0.266981	0.20237	0.165072	0.125122	0.10166
70.63	0.267877	0.202858	0.165061	0.124757	0.101195
70.83	0.268325	0.203446	0.165018	0.124769	0.101122
71.03	0.269134	0.203548	0.165146	0.124337	0.100848
71.23	0.269358	0.203816	0.164473	0.123863	0.100439
71.43	0.269868	0.204442	0.164723	0.123578	0.100511
71.63	0.270309	0.204921	0.165235	0.123472	0.100648
71.83	0.271386	0.205871	0.165607	0.123839	0.101235
72.03	0.271443	0.205925	0.165326	0.123655	0.101144
72.23	0.271923	0.206437	0.165598	0.123723	0.101366
72.43	0.272728	0.207163	0.165684	0.124381	0.102157
72.63	0.273621	0.207326	0.165731	0.124694	0.102428
72.83	0.274524	0.207485	0.166355	0.125207	0.102657
73.03	0.275648	0.207733	0.167163	0.125382	0.102775
73.23	0.276798	0.207955	0.167448	0.126015	0.103027
73.43	0.276529	0.20817	0.167374	0.126196	0.102818
73.63	0.277008	0.208332	0.167913	0.127035	0.103167
73.83	0.277502	0.209088	0.168543	0.127756	0.103626
74.03	0.278207	0.210091	0.169608	0.128158	0.104172
74.23	0.278824	0.210697	0.170353	0.128972	0.104223
74.43	0.279677	0.2119	0.17116	0.129562	0.104491
74.63	0.280394	0.212978	0.171578	0.130078	0.104963
74.83	0.280191	0.213093	0.172051	0.130379	0.104703
75.03	0.281066	0.214152	0.172891	0.131077	0.105072
75.23	0.281573	0.215303	0.173591	0.131701	0.105694
75.43	0.282122	0.216387	0.174456	0.131616	0.106264
75.63	0.282414	0.217285	0.17496	0.131763	0.10681
75.83	0.28242	0.217406	0.175093	0.131727	0.106868
76.03	0.28279	0.217733	0.175498	0.131844	0.107066
76.23	0.283626	0.218266	0.176391	0.13213	0.107282
76.43	0.284395	0.218296	0.176426	0.132676	0.107402
76.63	0.2845	0.217763	0.176527	0.132409	0.107072
76.83	0.284951	0.217853	0.17702	0.132279	0.107069
77.03	0.285453	0.218395	0.177626	0.13239	0.107497
77.23	0.285648	0.218446	0.177257	0.132617	0.107693
77.43	0.285758	0.218574	0.177461	0.132607	0.107885
77.63	0.286454	0.218547	0.177528	0.132814	0.107794
77.83	0.287291	0.219526	0.178384	0.132953	0.108092
78.03	0.288312	0.220114	0.179093	0.133654	0.108427
78.23	0.289098	0.220715	0.179547	0.134433	0.108859
78.43	0.290087	0.221461	0.180117	0.134798	0.109116
78.63	0.290753	0.221929	0.18036	0.135788	0.109512
78.83	0.291421	0.222345	0.180715	0.136448	0.109567
79.03	0.292721	0.224092	0.181486	0.137391	0.11059
79.23	0.293517	0.2248	0.181756	0.137688	0.11137
79.43	0.293891	0.225478	0.182022	0.138032	0.1118
79.63	0.294345	0.225844	0.182642	0.138461	0.112155
79.83	0.29514	0.226135	0.18329	0.139084	0.112216
80.03	0.295757	0.226862	0.183957	0.139787	0.112583
80.23	0.296629	0.227123	0.184595	0.140061	0.112725
80.43	0.296841	0.22678	0.1844	0.139996	0.112663
80.63	0.296862	0.226754	0.184561	0.139733	0.112769
80.83	0.297369	0.227494	0.184826	0.140087	0.113168
81.03	0.29754	0.228116	0.185302	0.140214	0.113399
81.23	0.298261	0.228078	0.185236	0.14027	0.113339
81.43	0.298996	0.228454	0.186109	0.140589	0.113787
81.63	0.299905	0.228978	0.186607	0.1411	0.114211
81.83	0.300995	0.229568	0.187541	0.14145	0.114615
82.03	0.301362	0.229564	0.187401	0.141537	0.11481
82.23	0.302266	0.230511	0.188006	0.141611	0.115229
82.43	0.302736	0.231046	0.188102	0.14148	0.115114
82.63	0.303297	0.231465	0.188431	0.142244	0.115273
82.83	0.303887	0.232321	0.188773	0.142618	0.11542
83.03	0.304603	0.23318	0.189408	0.143024	0.115977
83.23	0.305294	0.233653	0.189551	0.142884	0.116124
83.43	0.305587	0.23405	0.190134	0.143172	0.115981
83.63	0.305892	0.233685	0.190077	0.142843	0.115503
83.83	0.306285	0.233899	0.190097	0.142393	0.114709
84.03	0.306662	0.234355	0.191024	0.142599	0.115001
84.23	0.307292	0.234519	0.191295	0.142159	0.11528
84.43	0.308166	0.235195	0.191847	0.142407	0.115501
84.63	0.308857	0.235781	0.192064	0.14281	0.115808
84.83	0.309585	0.23653	0.192975	0.143517	0.116303
85.03	0.309547	0.236527	0.193143	0.14346	0.115953
85.23	0.310946	0.237333	0.194224	0.144342	0.116923
85.43	0.311607	0.237846	0.195207	0.145236	0.117942
85.63	0.312415	0.238523	0.195665	0.145858	0.118599
85.83	0.312822	0.239146	0.195985	0.145871	0.118975
86.03	0.313486	0.239628	0.196416	0.146298	0.11953
86.23	0.314268	0.240262	0.197065	0.147107	0.120162
86.43	0.315302	0.240842	0.197967	0.14825	0.120887
86.63	0.316208	0.241703	0.198726	0.149674	0.121545
86.83	0.317244	0.242674	0.199116	0.15044	0.122288
87.03	0.317788	0.243089	0.199626	0.150662	0.122427
87.23	0.31891	0.243747	0.199779	0.151352	0.122452
87.43	0.319452	0.244211	0.199993	0.152089	0.122397
87.63	0.319183	0.243951	0.19934	0.151499	0.122002
87.83	0.319551	0.244527	0.199841	0.151671	0.121912
88.03	0.319852	0.245189	0.200584	0.15213	0.122743
88.23	0.319572	0.244821	0.19984	0.15163	0.122449
88.43	0.320352	0.245286	0.199994	0.151644	0.122532
88.63	0.320148	0.244941	0.199078	0.151058	0.121738
88.83	0.31998	0.244915	0.199137	0.150864	0.121681
89.03	0.319863	0.244707	0.198904	0.15042	0.120926
89.23	0.319883	0.244529	0.199027	0.149793	0.120948
89.43	0.319527	0.243876	0.198488	0.149566	0.120882
89.63	0.319442	0.243926	0.198432	0.148979	0.120425
89.83	0.319472	0.244223	0.19869	0.148789	0.120483
90.03	0.320478	0.244774	0.199129	0.149363	0.120496
90.23	0.321059	0.245715	0.199936	0.150081	0.121315
90.43	0.322695	0.247069	0.201198	0.151104	0.121651
90.63	0.323231	0.248218	0.201486	0.151084	0.121725
90.83	0.324758	0.249751	0.202595	0.151624	0.122079
91.03	0.325856	0.250854	0.203628	0.152812	0.122505
91.23	0.327445	0.251967	0.204375	0.154003	0.123164
91.43	0.327876	0.252298	0.20464	0.154114	0.123307
91.63	0.328486	0.253081	0.205119	0.154469	0.123851
91.83	0.329631	0.25387	0.206422	0.155718	0.124698
92.03	0.330175	0.254165	0.207019	0.156293	0.125808
92.23	0.331265	0.254473	0.207393	0.156921	0.126137
92.43	0.332468	0.255366	0.207863	0.157824	0.126884
92.63	0.333158	0.255692	0.208031	0.158445	0.127173
92.83	0.333397	0.255665	0.208478	0.158824	0.12783
93.03	0.333922	0.256108	0.209188	0.159576	0.128498
93.23	0.333897	0.255665	0.20937	0.159669	0.128855
93.43	0.33436	0.256049	0.20971	0.160478	0.129329
93.63	0.334348	0.256395	0.210161	0.160439	0.129113
93.83	0.334481	0.256927	0.210738	0.160541	0.129428
94.03	0.335167	0.257434	0.210916	0.160951	0.129779
94.23	0.335526	0.257573	0.211217	0.16144	0.130018
94.43	0.336051	0.257789	0.211499	0.161429	0.129309
94.63	0.335963	0.257938	0.211579	0.160612	0.128953
94.83	0.336968	0.258646	0.21254	0.16131	0.129176
95.03	0.337248	0.258845	0.212616	0.161349	0.129044
95.23	0.337602	0.259213	0.212798	0.16131	0.128838
95.43	0.338118	0.259811	0.213142	0.161502	0.12921
95.63	0.339129	0.260968	0.21363	0.162047	0.129804
95.83	0.339577	0.261148	0.21412	0.162315	0.129876
96.03	0.339733	0.261421	0.214347	0.162173	0.130091
96.23	0.340338	0.262176	0.214271	0.162454	0.129891
96.43	0.341065	0.263257	0.214519	0.163143	0.13052
96.63	0.341309	0.263842	0.214876	0.16324	0.130895
96.83	0.34147	0.264317	0.214947	0.163507	0.130843
97.03	0.342379	0.265085	0.215791	0.16408	0.131658
97.23	0.342603	0.26483	0.215887	0.163578	0.131445
97.43	0.342947	0.264832	0.21613	0.163724	0.131441
97.63	0.343501	0.26501	0.216536	0.163409	0.131677
97.83	0.344042	0.265039	0.216672	0.163221	0.132131
98.03	0.344783	0.265111	0.216668	0.163822	0.132455
98.23	0.345391	0.265331	0.217317	0.164154	0.13269
98.43	0.346109	0.266144	0.21856	0.164347	0.13311
98.63	0.346465	0.26663	0.219441	0.164173	0.133392
98.83	0.347199	0.267697	0.220178	0.16508	0.133892
99.03	0.34801	0.268581	0.22085	0.165764	0.134303
99.23	0.348464	0.269154	0.221588	0.166417	0.134502
99.43	0.348584	0.269327	0.221717	0.166662	0.134408
99.63	0.348794	0.26954	0.222048	0.16702	0.13415
99.83	0.349026	0.269669	0.222712	0.167452	0.134098
100.03	0.349339	0.269928	0.222998	0.167471	0.134183
100.23	0.350426	0.270922	0.22335	0.168323	0.134422
100.43	0.351188	0.271598	0.223922	0.168797	0.134707
100.63	0.350997	0.271994	0.224208	0.168655	0.134544
100.83	0.352004	0.272759	0.224992	0.169421	0.134778
101.03	0.352392	0.273058	0.225278	0.169066	0.135233
101.23	0.352702	0.273141	0.22531	0.16881	0.135071
101.43	0.352982	0.273026	0.22521	0.168758	0.13507
101.63	0.353415	0.273696	0.225355	0.168764	0.13554
101.83	0.353723	0.2739	0.225363	0.168727	0.136
102.03	0.354408	0.27456	0.226	0.169349	0.136519
102.23	0.355126	0.275632	0.22683	0.169727	0.137462
102.43	0.355637	0.276585	0.227131	0.170018	0.138029
102.63	0.356116	0.277248	0.227272	0.170224	0.138433
102.83	0.356546	0.27807	0.227461	0.170915	0.139045
103.03	0.35754	0.278408	0.227715	0.171514	0.139281
103.23	0.357571	0.278271	0.227927	0.171916	0.139392
103.43	0.357594	0.277699	0.227741	0.172445	0.139005
103.63	0.358281	0.277717	0.22795	0.172539	0.139457
103.83	0.359015	0.277907	0.227936	0.173103	0.139267
104.03	0.359557	0.277601	0.227981	0.173421	0.139105
104.23	0.36041	0.278648	0.228598	0.17403	0.139031
104.43	0.360594	0.27893	0.229115	0.173943	0.138868
104.63	0.360695	0.27976	0.229951	0.174329	0.138824
104.83	0.361391	0.28041	0.230894	0.174911	0.139095
105.03	0.361355	0.280688	0.231067	0.174641	0.138848
105.23	0.362081	0.281028	0.231758	0.175242	0.138896
105.43	0.362113	0.280968	0.231965	0.175205	0.138854
105.63	0.3625	0.281298	0.233203	0.175688	0.139087
105.83	0.363173	0.282025	0.233707	0.17607	0.139683
106.03	0.364001	0.283106	0.23445	0.176869	0.140533
106.23	0.364811	0.284038	0.235068	0.177298	0.14116
106.43	0.366203	0.285134	0.235487	0.177927	0.14195
106.63	0.36722	0.286118	0.236369	0.178423	0.142847
106.83	0.367728	0.286632	0.236476	0.178388	0.14329
107.03	0.368951	0.286715	0.236566	0.178637	0.143574
107.23	0.368991	0.286485	0.236573	0.178034	0.143376
107.43	0.369383	0.286579	0.236534	0.17784	0.143167
107.63	0.369909	0.28688	0.236578	0.177521	0.143622
107.83	0.370663	0.287283	0.236917	0.17835	0.14356
108.03	0.37097	0.287226	0.237024	0.17814	0.14361
108.23	0.372115	0.288313	0.237488	0.178269	0.144014
108.43	0.37269	0.288607	0.237941	0.178472	0.144305
108.63	0.373233	0.288914	0.238401	0.178523	0.144575
108.83	0.374385	0.289428	0.239068	0.178951	0.144881
109.03	0.375085	0.289677	0.239607	0.179507	0.145073
109.23	0.375716	0.290427	0.24024	0.180208	0.145558
109.43	0.376024	0.290618	0.241107	0.180811	0.145857
109.63	0.376237	0.291524	0.242078	0.181549	0.146162
109.83	0.376255	0.292786	0.241838	0.181881	0.146908
110.03	0.376709	0.29296	0.242308	0.182312	0.14732
110.23	0.377396	0.293298	0.242844	0.182757	0.147336
110.43	0.377657	0.293864	0.242788	0.183079	0.147474
110.63	0.377231	0.293881	0.242666	0.182809	0.147356
110.83	0.377244	0.293787	0.242326	0.182031	0.147389
111.03	0.37725	0.293881	0.242286	0.181799	0.147346
111.23	0.376734	0.294092	0.241969	0.181037	0.147026
111.43	0.376549	0.294109	0.242091	0.181639	0.147287
111.63	0.377073	0.294434	0.242484	0.181916	0.147749
111.83	0.377536	0.294387	0.242741	0.182139	0.147935
112.03	0.378217	0.294754	0.242844	0.182031	0.147896
112.23	0.379316	0.295242	0.24347	0.182722	0.148572
112.43	0.379985	0.295397	0.24392	0.183082	0.148728
112.63	0.380283	0.294941	0.244184	0.183369	0.148867
112.83	0.381234	0.296015	0.24465	0.18434	0.149217
113.03	0.381741	0.296426	0.244956	0.185126	0.149742
113.23	0.382369	0.297471	0.245145	0.186143	0.15046
113.43	0.383106	0.298218	0.246195	0.187367	0.151096
113.63	0.383543	0.299047	0.246571	0.188001	0.151604
113.83	0.384288	0.299386	0.246888	0.188638	0.152324
114.03	0.385516	0.29954	0.247869	0.189564	0.152608
114.23	0.386342	0.299992	0.248377	0.189857	0.153009
114.43	0.387275	0.300584	0.248412	0.190235	0.15311
114.63	0.388408	0.301135	0.249071	0.190718	0.153453
114.83	0.38915	0.3021	0.24969	0.190737	0.154025
115.03	0.389379	0.303045	0.2505	0.19106	0.154114
115.23	0.389705	0.303505	0.251162	0.191042	0.154194
115.43	0.390209	0.304259	0.252072	0.1919	0.154406
115.63	0.39106	0.304809	0.252933	0.192304	0.154742
115.83	0.391409	0.30504	0.253208	0.192225	0.154392
116.03	0.391595	0.305536	0.253359	0.191949	0.154057
116.23	0.391564	0.305454	0.253628	0.191998	0.154134
116.43	0.391771	0.305576	0.253657	0.191972	0.153972
116.63	0.391964	0.305855	0.253521	0.19255	0.154016
116.83	0.392276	0.306865	0.253643	0.192471	0.154496
117.03	0.392188	0.306409	0.253475	0.192561	0.154638
117.23	0.39235	0.306714	0.253488	0.192723	0.155246
117.43	0.392991	0.307159	0.254237	0.193151	0.155715
117.63	0.393572	0.306888	0.254197	0.193229	0.155973
117.83	0.394096	0.30704	0.254323	0.193527	0.156063
118.03	0.395019	0.307651	0.25482	0.194074	0.156654
118.23	0.395782	0.307546	0.254803	0.194471	0.157001
118.43	0.396918	0.308006	0.254962	0.19512	0.157023
118.63	0.397382	0.308847	0.255669	0.195512	0.158117
118.83	0.39767	0.309981	0.256342	0.195865	0.158814
119.03	0.398054	0.310671	0.257196	0.196207	0.159307
119.23	0.398864	0.311413	0.257732	0.196829	0.159487
119.43	0.399152	0.312129	0.257638	0.197116	0.159474
119.63	0.39969	0.312103	0.257316	0.197016	0.15911
119.83	0.400005	0.312762	0.257517	0.196913	0.158431
120.03	0.40019	0.313288	0.258028	0.197171	0.158615
120.23	0.400593	0.3144	0.258447	0.197536	0.159018
120.43	0.400935	0.314925	0.258481	0.197682	0.158998
120.63	0.400716	0.315212	0.258713	0.197911	0.159029
120.83	0.400465	0.315648	0.259322	0.197803	0.159295
121.03	0.400277	0.315685	0.259376	0.19758	0.159305
121.23	0.400333	0.316002	0.259451	0.196965	0.159116
121.43	0.400992	0.315947	0.259989	0.197335	0.158849
121.63	0.401063	0.315449	0.260124	0.197534	0.158636
121.83	0.401349	0.315616	0.260399	0.198257	0.158566
122.03	0.401794	0.315574	0.261071	0.199041	0.15891
122.23	0.401589	0.315114	0.26111	0.199225	0.158849
122.43	0.402099	0.315263	0.261823	0.199781	0.159522
122.63	0.402618	0.315647	0.262645	0.200133	0.160567
122.83	0.403365	0.316248	0.263435	0.200746	0.160891
123.03	0.404644	0.317013	0.264186	0.20096	0.161137
123.23	0.405415	0.317767	0.264794	0.201503	0.161181
123.43	0.405923	0.318313	0.26501	0.20172	0.161283
123.63	0.406667	0.31868	0.265578	0.202282	0.161343
123.83	0.40718	0.319717	0.266199	0.202823	0.161787
124.03	0.407666	0.32067	0.266743	0.203077	0.162496
124.23	0.407522	0.321186	0.266406	0.20284	0.162854
124.43	0.407938	0.321289	0.266675	0.202946	0.162722
124.63	0.40803	0.32172	0.267057	0.203162	0.162527
124.83	0.408665	0.322555	0.267363	0.203458	0.162895
125.03	0.408778	0.322759	0.267341	0.202637	0.162803
125.23	0.409689	0.323315	0.267959	0.202883	0.163108
125.43	0.410348	0.32347	0.268338	0.20363	0.163468
125.63	0.410729	0.324173	0.268761	0.203995	0.164032
125.83	0.410986	0.324575	0.269085	0.204511	0.16415
126.03	0.411534	0.324901	0.269804	0.205121	0.164562
126.23	0.412138	0.325376	0.270073	0.205062	0.165064
126.43	0.413133	0.325727	0.270593	0.205335	0.165708
126.63	0.413999	0.326033	0.270758	0.205511	0.165824
126.83	0.41437	0.326439	0.270991	0.20579	0.165871
127.03	0.415272	0.327249	0.271302	0.206397	0.166542
127.23	0.415443	0.327584	0.271814	0.206837	0.166793
127.43	0.415245	0.327385	0.271443	0.206797	0.166726
127.63	0.415533	0.327464	0.271801	0.206874	0.167279
127.83	0.415849	0.327887	0.27183	0.207334	0.167869
128.03	0.41608	0.327897	0.271858	0.207055	0.167797
128.23	0.416221	0.327515	0.271226	0.20724	0.16776
128.43	0.416162	0.327198	0.270999	0.206692	0.166995
128.63	0.416054	0.326774	0.270827	0.206262	0.166483
128.83	0.416207	0.327109	0.270928	0.206252	0.16684
129.03	0.416071	0.327265	0.271017	0.205752	0.167049
129.23	0.416664	0.328192	0.271981	0.206351	0.167822
129.43	0.417269	0.328675	0.272182	0.206783	0.167895
129.63	0.418258	0.32948	0.272945	0.207066	0.168462
129.83	0.41898	0.330087	0.27368	0.207706	0.168732
130.03	0.419896	0.330894	0.274238	0.207967	0.168897
130.23	0.421081	0.331771	0.274924	0.208058	0.1694
130.43	0.421961	0.332218	0.275343	0.208417	0.169168
130.63	0.422353	0.33253	0.27574	0.209197	0.169256
130.83	0.423051	0.333494	0.276791	0.210242	0.170273
131.03	0.423788	0.333868	0.27724	0.210965	0.170591
131.23	0.424507	0.334327	0.278133	0.211513	0.170841
131.43	0.424579	0.334709	0.27848	0.212174	0.171316
131.63	0.4256	0.335419	0.279643	0.212898	0.172162
131.83	0.426187	0.336235	0.279924	0.213872	0.172556
132.03	0.42648	0.336044	0.280026	0.213531	0.17233
132.23	0.426505	0.335749	0.279512	0.213317	0.172141
132.43	0.42628	0.335609	0.279614	0.213023	0.171752
132.63	0.426599	0.335941	0.279896	0.213278	0.171762
132.83	0.42672	0.336184	0.280156	0.213297	0.171879
133.03	0.426891	0.336244	0.280426	0.213628	0.172453
133.23	0.42797	0.336764	0.28094	0.21414	0.172932
133.43	0.428496	0.336904	0.280842	0.214493	0.172897
133.63	0.428555	0.336986	0.281192	0.21432	0.173287
133.83	0.428594	0.337326	0.281537	0.214503	0.173325
134.03	0.429308	0.3379	0.281866	0.214761	0.173384
134.23	0.430145	0.338284	0.282389	0.214981	0.173793
134.43	0.430652	0.338448	0.282236	0.215433	0.173498
134.63	0.431269	0.339222	0.282722	0.216529	0.174174
134.83	0.432074	0.34021	0.283577	0.217452	0.174904
135.03	0.432233	0.340225	0.283632	0.217624	0.174695
135.23	0.43288	0.341034	0.284274	0.218164	0.175426
135.43	0.43327	0.341749	0.284885	0.219166	0.176088
135.63	0.433862	0.342032	0.285268	0.219032	0.176263
135.83	0.434327	0.342866	0.285435	0.219229	0.17672
136.03	0.434242	0.342344	0.285195	0.218319	0.176279
136.23	0.434692	0.342724	0.284865	0.218296	0.176289
136.43	0.435109	0.34327	0.285529	0.219005	0.176358
136.63	0.435422	0.343642	0.285763	0.219052	0.17633
136.83	0.43576	0.343874	0.285961	0.218683	0.176825
137.03	0.436273	0.344251	0.286166	0.219094	0.177598
137.23	0.436506	0.344186	0.286377	0.21897	0.177355
137.43	0.436118	0.344374	0.286381	0.21906	0.177382
137.63	0.435593	0.344183	0.286655	0.218833	0.177047
137.83	0.436226	0.345101	0.287356	0.219572	0.177103
138.03	0.437311	0.345643	0.288057	0.22017	0.177349
138.23	0.437964	0.346001	0.288308	0.220431	0.17761
138.43	0.438664	0.346516	0.288743	0.220928	0.177791
138.63	0.439427	0.347677	0.289519	0.221161	0.178391
138.83	0.439287	0.347902	0.290097	0.220959	0.178521
139.03	0.439631	0.347938	0.290552	0.22092	0.178872
139.23	0.440234	0.348197	0.291197	0.221179	0.178961
139.43	0.44068	0.348897	0.291937	0.221666	0.179442
139.63	0.440761	0.349042	0.292416	0.221121	0.179509
139.83	0.44081	0.349983	0.292812	0.22143	0.180053
140.03	0.440672	0.350005	0.292667	0.221	0.180074
140.23	0.441008	0.350438	0.293219	0.22152	0.180697
140.43	0.44083	0.350403	0.293522	0.221813	0.180273
140.63	0.441112	0.350526	0.293863	0.221876	0.180598
140.83	0.441625	0.351081	0.293863	0.221799	0.181169
141.03	0.441828	0.350714	0.293496	0.222186	0.181059
141.23	0.441879	0.350646	0.293577	0.222734	0.180849
141.43	0.442383	0.351453	0.293367	0.223759	0.180846
141.63	0.442907	0.352116	0.293859	0.224464	0.180915
141.83	0.444736	0.353408	0.294807	0.225416	0.181498
142.03	0.445718	0.353899	0.295149	0.226171	0.181589
142.23	0.446621	0.354308	0.295434	0.226838	0.181772
142.43	0.447617	0.355191	0.296207	0.227401	0.182082
142.63	0.448482	0.355922	0.296634	0.228056	0.182566
142.83	0.448779	0.355976	0.297062	0.229059	0.182728
143.03	0.449764	0.356645	0.297885	0.229632	0.183328
143.23	0.450182	0.357191	0.298225	0.230382	0.183821
143.43	0.450318	0.357802	0.29871	0.230941	0.184553
143.63	0.450465	0.358216	0.299457	0.230736	0.184852
143.83	0.45075	0.358894	0.299753	0.231213	0.185334
144.03	0.451087	0.359433	0.300385	0.231359	0.185883
144.23	0.450907	0.359337	0.300647	0.231232	0.186169
144.43	0.450729	0.359451	0.300857	0.231274	0.185832
144.63	0.451371	0.359568	0.301302	0.230916	0.186318
144.83	0.452103	0.360129	0.301664	0.231415	0.186779
145.03	0.452318	0.360417	0.301756	0.231481	0.186695
145.23	0.453149	0.361185	0.302393	0.232099	0.186866
145.43	0.453583	0.361726	0.302485	0.232637	0.186915
145.63	0.454434	0.362499	0.303203	0.232757	0.187288
145.83	0.455054	0.362983	0.303946	0.232961	0.187161
146.03	0.455169	0.362806	0.304135	0.233148	0.186896
146.23	0.45607	0.362583	0.304513	0.23323	0.186872
146.43	0.45651	0.363028	0.304975	0.233072	0.187141
146.63	0.456435	0.36294	0.304668	0.233098	0.186985
146.83	0.456386	0.363188	0.304532	0.23285	0.186989
147.03	0.456544	0.363702	0.304614	0.232591	0.187388
147.23	0.45651	0.363979	0.304386	0.232149	0.188053
147.43	0.456842	0.364305	0.30491	0.231854	0.18825
147.63	0.456978	0.364553	0.305032	0.231353	0.188344
147.83	0.457385	0.365287	0.305305	0.231734	0.188835
148.03	0.457697	0.366166	0.305865	0.231563	0.189272
148.23	0.457501	0.366175	0.305832	0.23145	0.189476
148.43	0.45825	0.366577	0.306102	0.232041	0.189809
148.63	0.458876	0.366709	0.306582	0.232021	0.189826
148.83	0.46003	0.36798	0.307516	0.233267	0.19057
149.03	0.460583	0.368132	0.307782	0.233491	0.190763
149.23	0.461273	0.368176	0.307689	0.23409	0.190984
149.43	0.461749	0.368657	0.308362	0.235104	0.191429
149.63	0.462931	0.369614	0.309392	0.23574	0.19232
149.83	0.46337	0.369406	0.309651	0.235697	0.19242
150.03	0.463562	0.369012	0.309642	0.235917	0.191794
150.23	0.46448	0.369725	0.310199	0.236763	0.192202
150.43	0.464421	0.370747	0.310565	0.237172	0.192585
150.63	0.464154	0.370986	0.310394	0.237539	0.192728
150.83	0.464625	0.37166	0.310545	0.237874	0.193085
151.03	0.464865	0.372076	0.310848	0.238337	0.193217
151.23	0.465127	0.37245	0.311507	0.238285	0.193616
151.43	0.465215	0.372541	0.311924	0.238954	0.19349
151.63	0.464427	0.372733	0.311224	0.238798	0.193102
151.83	0.464897	0.37342	0.31149	0.239189	0.192912
152.03	0.465513	0.373691	0.311914	0.239919	0.192875
152.23	0.465494	0.373412	0.311973	0.240192	0.192801
152.43	0.465843	0.373123	0.311767	0.240094	0.192676
152.63	0.465867	0.373107	0.312373	0.239966	0.192553
152.83	0.466548	0.373022	0.312817	0.24018	0.193017
153.03	0.466522	0.372452	0.312979	0.24002	0.193143
153.23	0.466758	0.373454	0.313219	0.240386	0.193751
153.43	0.467346	0.373831	0.314258	0.240651	0.194325
153.63	0.46862	0.374734	0.315086	0.241085	0.195598
153.83	0.468993	0.374648	0.315224	0.241333	0.195674
154.03	0.469784	0.37551	0.316239	0.242691	0.196317
154.23	0.470697	0.376843	0.317361	0.243528	0.197912
154.43	0.471006	0.377689	0.317841	0.243529	0.19838
154.63	0.47135	0.377933	0.317938	0.243745	0.198808
154.83	0.47203	0.378893	0.318436	0.244407	0.198995
155.03	0.472331	0.379815	0.318996	0.244901	0.199438
155.23	0.472568	0.380393	0.319258	0.244932	0.199871
155.43	0.47273	0.380847	0.318931	0.244964	0.199885
155.63	0.472745	0.38147	0.318843	0.245041	0.199863
155.83	0.473537	0.381663	0.319276	0.245784	0.199705
156.03	0.473447	0.381172	0.319293	0.245484	0.199163
156.23	0.473391	0.38113	0.319693	0.245206	0.199114
156.43	0.473693	0.38082	0.319871	0.244724	0.1991
156.63	0.474006	0.380971	0.320402	0.244581	0.199483
156.83	0.474113	0.380947	0.320408	0.24431	0.199189
157.03	0.474174	0.381216	0.320338	0.244273	0.199007
157.23	0.474221	0.381573	0.319897	0.243975	0.198419
157.43	0.474839	0.381729	0.320423	0.24412	0.198546
157.63	0.475912	0.382494	0.321063	0.244698	0.199219
157.83	0.475982	0.381961	0.320946	0.244962	0.198893
158.03	0.476905	0.382456	0.32166	0.245711	0.199211
158.23	0.477278	0.382864	0.321936	0.245997	0.199033
158.43	0.477848	0.383239	0.322096	0.246233	0.198873
158.63	0.478601	0.383991	0.322681	0.246924	0.19957
158.83	0.479498	0.384833	0.323545	0.247598	0.200129
159.03	0.480463	0.385539	0.324214	0.247834	0.200615
159.23	0.481256	0.385764	0.324821	0.248217	0.201127
159.43	0.481717	0.38643	0.325701	0.249019	0.201605
159.63	0.481589	0.386659	0.326255	0.249695	0.201515
159.83	0.481464	0.386449	0.326656	0.250163	0.201301
160.03	0.481805	0.386217	0.326999	0.250121	0.201484
160.23	0.48219	0.386568	0.327495	0.250199	0.202145
160.43	0.482771	0.386407	0.32758	0.2498	0.202357
160.63	0.482988	0.386733	0.32789	0.250595	0.202606
160.83	0.482957	0.387454	0.328026	0.250899	0.202783
161.03	0.483023	0.387929	0.32801	0.251349	0.203192
161.23	0.483016	0.388402	0.328059	0.251455	0.203305
161.43	0.483906	0.389181	0.328526	0.252171	0.204595
161.63	0.484299	0.388849	0.328419	0.251905	0.204659
161.83	0.484263	0.388741	0.328396	0.252625	0.20463
162.03	0.485083	0.389604	0.329435	0.25325	0.205039
162.23	0.485802	0.390446	0.329922	0.25372	0.205373
162.43	0.486238	0.390987	0.330429	0.254029	0.206052
162.63	0.487236	0.391901	0.331372	0.254565	0.206953
162.83	0.488116	0.392646	0.331863	0.25506	0.207173
163.03	0.488483	0.393303	0.332115	0.255029	0.207147
163.23	0.488818	0.393624	0.332409	0.255718	0.207053
163.43	0.48858	0.394017	0.332513	0.255794	0.206845
163.63	0.488308	0.393903	0.332206	0.255966	0.206489
163.83	0.488207	0.39348	0.332179	0.255687	0.206371
164.03	0.488333	0.393143	0.331636	0.255044	0.206023
164.23	0.488341	0.39341	0.33166	0.254834	0.20611
164.43	0.488791	0.393495	0.331771	0.255057	0.2061
164.63	0.488908	0.39393	0.332102	0.255723	0.206102
164.83	0.489551	0.395127	0.332548	0.255878	0.206648
165.03	0.489913	0.395368	0.332753	0.256027	0.207051
165.23	0.490724	0.395471	0.333099	0.255819	0.207246
165.43	0.491316	0.39569	0.333009	0.255682	0.207258
165.63	0.491187	0.395524	0.333286	0.25545	0.207034
165.83	0.491977	0.396053	0.33388	0.256241	0.207326
166.03	0.49292	0.396673	0.335084	0.256716	0.208068
166.23	0.493627	0.397656	0.335636	0.257378	0.208679
166.43	0.494539	0.398297	0.336724	0.25831	0.20964
166.63	0.495332	0.398961	0.337134	0.258562	0.210065
166.83	0.495765	0.399525	0.337111	0.258638	0.210115
167.03	0.496344	0.399889	0.337828	0.258844	0.210759
167.23	0.496932	0.400194	0.338257	0.259312	0.211004
167.43	0.496726	0.400759	0.338375	0.259494	0.211464
167.63	0.49692	0.400958	0.338591	0.259836	0.21207
167.83	0.4968	0.401133	0.33904	0.259963	0.212625
168.03	0.497035	0.401559	0.339115	0.259989	0.212731
168.23	0.497525	0.401923	0.339861	0.261112	0.213637
168.43	0.49783	0.40205	0.339839	0.261058	0.21352
168.63	0.498264	0.402196	0.340508	0.261515	0.213594
168.83	0.498704	0.402872	0.340805	0.261502	0.21399
169.03	0.498967	0.402847	0.341239	0.261577	0.214055
169.23	0.499166	0.402614	0.340904	0.261599	0.213651
169.43	0.499439	0.40275	0.340722	0.262164	0.213804
169.63	0.49924	0.402518	0.340515	0.26205	0.213166
169.83	0.499793	0.402974	0.340763	0.262378	0.213136
170.03	0.500097	0.403521	0.341381	0.263113	0.213403
170.23	0.500395	0.404243	0.341932	0.26373	0.213356
170.43	0.500685	0.404068	0.341772	0.26368	0.213436
170.63	0.500372	0.403839	0.341488	0.263183	0.213018
170.83	0.50042	0.404105	0.341733	0.262923	0.213037
171.03	0.501147	0.404506	0.342321	0.263282	0.213492
171.23	0.500738	0.405017	0.341935	0.263258	0.212883
171.43	0.500588	0.40549	0.341762	0.263639	0.212838
171.63	0.501328	0.406256	0.342685	0.264421	0.213441
171.83	0.501211	0.406437	0.343467	0.264641	0.21366
172.03	0.50221	0.406905	0.343911	0.26473	0.213722
172.23	0.502814	0.406923	0.344582	0.265251	0.21415
172.43	0.503602	0.40772	0.345227	0.265096	0.214746
172.63	0.504456	0.408229	0.345811	0.265849	0.215789
172.83	0.505064	0.408889	0.346278	0.265939	0.216101
173.03	0.50606	0.409347	0.346888	0.266627	0.216336
173.23	0.506323	0.409656	0.346758	0.266835	0.216381
173.43	0.506893	0.41023	0.34752	0.26727	0.216825
173.63	0.507367	0.410763	0.347723	0.267141	0.216569
173.83	0.508229	0.411879	0.348069	0.267888	0.217197
174.03	0.509122	0.412232	0.347966	0.268621	0.217478
174.23	0.509783	0.412716	0.348477	0.26909	0.217987
174.43	0.509704	0.412594	0.347891	0.269005	0.217939
174.63	0.510081	0.413104	0.348279	0.269318	0.218147
174.83	0.510023	0.413234	0.348158	0.26957	0.218522
175.03	0.510076	0.413244	0.347975	0.269822	0.218477
175.23	0.509539	0.413657	0.347791	0.270227	0.218194
175.43	0.509932	0.413774	0.348151	0.270867	0.218463
175.63	0.509601	0.41394	0.349057	0.271237	0.218817
175.83	0.509062	0.413506	0.34937	0.270674	0.21866
176.03	0.509261	0.413905	0.349895	0.270987	0.218993
176.23	0.509142	0.413542	0.349915	0.270709	0.219074
176.43	0.510158	0.414321	0.350628	0.27125	0.220174
176.63	0.510363	0.414587	0.351083	0.271716	0.220339
176.83	0.510315	0.414875	0.352078	0.271823	0.220364
177.03	0.510483	0.41535	0.352504	0.272029	0.22025
177.23	0.510929	0.415902	0.353229	0.27199	0.220888
177.43	0.512085	0.416789	0.353972	0.272687	0.22209
177.63	0.512985	0.417552	0.353965	0.272842	0.222536
177.83	0.513648	0.418388	0.354074	0.273273	0.222846
178.03	0.514081	0.418623	0.354094	0.273565	0.222937
178.23	0.51474	0.419418	0.354445	0.27386	0.222844
178.43	0.514623	0.419965	0.354122	0.27382	0.222625
178.63	0.515091	0.420142	0.354014	0.273824	0.222939
178.83	0.515399	0.420171	0.354225	0.27412	0.223536
179.03	0.515607	0.42015	0.35412	0.273973	0.223281
179.23	0.515753	0.420466	0.354299	0.274184	0.223339
179.43	0.515759	0.4204	0.354556	0.273858	0.223292
179.63	0.515719	0.420913	0.355041	0.273736	0.223319
179.83	0.516271	0.421478	0.355645	0.274031	0.223427
180.03	0.516613	0.421366	0.355614	0.274157	0.223449
180.23	0.517647	0.421867	0.355949	0.274501	0.22375
180.43	0.518335	0.422655	0.356503	0.274973	0.224208
180.63	0.518254	0.422951	0.357133	0.275018	0.224145
180.83	0.518576	0.423046	0.35765	0.275259	0.224436
181.03	0.518626	0.422838	0.357716	0.275265	0.224553
181.23	0.519264	0.422913	0.358229	0.27564	0.225761
181.43	0.519479	0.423028	0.358287	0.276155	0.226269
181.63	0.519773	0.42293	0.358226	0.27618	0.22592
181.83	0.520458	0.423451	0.358849	0.276825	0.226152
182.03	0.52075	0.423843	0.358992	0.277567	0.226097
182.23	0.521359	0.424464	0.359549	0.278176	0.226193
182.43	0.521587	0.424711	0.359482	0.278797	0.227036
182.63	0.522055	0.424711	0.359863	0.27946	0.227253
182.83	0.522818	0.425366	0.360713	0.28037	0.227786
183.03	0.522919	0.425625	0.360978	0.280702	0.22789
183.23	0.52324	0.42608	0.361566	0.280946	0.228133
183.43	0.523679	0.426525	0.361978	0.281077	0.227945
183.63	0.524222	0.427447	0.362854	0.28163	0.228372
183.83	0.524512	0.427652	0.363023	0.282212	0.228331
184.03	0.524453	0.427383	0.363022	0.281979	0.227682
184.23	0.525184	0.428144	0.363544	0.28217	0.22802
184.43	0.524938	0.428121	0.363524	0.281569	0.227572
184.63	0.524597	0.427964	0.363787	0.280902	0.227337
184.83	0.524609	0.427977	0.364104	0.280936	0.227428
185.03	0.524728	0.427809	0.364106	0.281119	0.227911
185.23	0.525478	0.428116	0.364213	0.28116	0.228181
185.43	0.52589	0.428497	0.364436	0.28123	0.228562
185.63	0.526404	0.428462	0.36477	0.281466	0.228565
185.83	0.527579	0.4291	0.365535	0.281678	0.229208
186.03	0.528123	0.429671	0.365859	0.282035	0.229502
186.23	0.528373	0.430178	0.36634	0.282447	0.229654
186.43	0.528773	0.430466	0.366458	0.282788	0.230002
186.63	0.529378	0.431187	0.367095	0.283269	0.230282
186.83	0.530115	0.432275	0.36769	0.284076	0.23094
187.03	0.530621	0.432862	0.367957	0.284693	0.231452
187.23	0.53107	0.43321	0.368203	0.284778	0.231544
187.43	0.531583	0.433754	0.368413	0.284918	0.231775
187.63	0.531476	0.43412	0.368519	0.285255	0.231948
187.83	0.531584	0.434398	0.368475	0.285435	0.231832
188.03	0.531868	0.435051	0.368906	0.285686	0.232326
188.23	0.532346	0.435441	0.369276	0.285918	0.232787
188.43	0.532945	0.436333	0.369807	0.286483	0.232972
188.63	0.532999	0.436937	0.370136	0.287091	0.233204
188.83	0.534101	0.437804	0.370573	0.287841	0.233686
189.03	0.534775	0.438012	0.370568	0.288237	0.233665
189.23	0.535505	0.438599	0.370979	0.288464	0.234048
189.43	0.535574	0.438433	0.371214	0.288422	0.234508
189.63	0.53588	0.438333	0.37165	0.28899	0.234811
189.83	0.536158	0.438444	0.371777	0.288781	0.235271
190.03	0.536219	0.438813	0.372384	0.289062	0.235394
190.23	0.535554	0.438423	0.372311	0.288944	0.235092
190.43	0.535337	0.438054	0.372563	0.289239	0.235241
190.63	0.534864	0.438336	0.372857	0.289269	0.235961
190.83	0.534882	0.438482	0.373372	0.289835	0.236379
191.03	0.535072	0.438056	0.37355	0.290096	0.236894
191.23	0.534893	0.438269	0.374125	0.290139	0.237422
191.43	0.535093	0.438616	0.374481	0.289799	0.23765
191.63	0.534469	0.438966	0.374675	0.290012	0.237856
191.83	0.534755	0.439362	0.375558	0.290092	0.238192
192.03	0.53504	0.439318	0.375549	0.29017	0.238173
192.23	0.535979	0.43972	0.37632	0.290758	0.238066
192.43	0.536586	0.440493	0.376557	0.291236	0.237877
192.63	0.536809	0.44074	0.376515	0.291254	0.23755
192.83	0.537675	0.441367	0.37634	0.291017	0.237191
193.03	0.538102	0.441794	0.376413	0.291357	0.236871
193.23	0.539034	0.442539	0.376851	0.292085	0.237513
193.43	0.53935	0.442473	0.377022	0.292074	0.2371
193.63	0.539599	0.44294	0.377027	0.292359	0.237111
193.83	0.539356	0.442787	0.376509	0.291658	0.236595
194.03	0.540794	0.443487	0.377128	0.292302	0.236803
194.23	0.540806	0.443336	0.376897	0.292261	0.236785
194.43	0.541273	0.443847	0.377492	0.293012	0.237471
194.63	0.542143	0.444209	0.37801	0.292989	0.238225
194.83	0.542637	0.444666	0.378031	0.293293	0.238878
195.03	0.542935	0.445091	0.378331	0.293426	0.239319
195.23	0.543347	0.446138	0.379056	0.293675	0.24015
195.43	0.543252	0.445998	0.379285	0.293308	0.240139
195.63	0.542942	0.446471	0.379965	0.293594	0.24074
195.83	0.543188	0.446001	0.380441	0.293601	0.241001
196.03	0.543567	0.446044	0.380846	0.293622	0.241425
196.23	0.544074	0.446595	0.381668	0.294421	0.241916
196.43	0.543748	0.446561	0.381739	0.29403	0.241962
196.63	0.543988	0.446763	0.38198	0.294037	0.242105
196.83	0.544534	0.447633	0.382788	0.294442	0.242583
197.03	0.545027	0.447841	0.383347	0.29538	0.242574
197.23	0.545426	0.448275	0.384128	0.295982	0.242695
197.43	0.545514	0.447784	0.384198	0.295289	0.241807
197.63	0.545969	0.44795	0.384346	0.29551	0.242117
197.83	0.546769	0.448395	0.384628	0.295939	0.242655
198.03	0.548032	0.448615	0.385221	0.296736	0.24308
198.23	0.548219	0.448669	0.385154	0.29633	0.242771
198.43	0.54882	0.449179	0.385467	0.296402	0.242928
198.63	0.549403	0.449191	0.385672	0.29622	0.242701
198.83	0.548531	0.449398	0.38484	0.295927	0.242618
199.03	0.549383	0.449783	0.385271	0.296544	0.242938
199.23	0.549558	0.450018	0.385422	0.296665	0.243099
199.43	0.549848	0.450457	0.385913	0.297104	0.24353
199.63	0.550895	0.45159	0.386785	0.29792	0.244505
199.83	0.551786	0.45164	0.38728	0.298539	0.245304
200.03	0.552151	0.452296	0.387817	0.298809	0.245857
200.23	0.55217	0.452558	0.387626	0.29928	0.246016
200.43	0.552252	0.453083	0.387841	0.299419	0.246339
200.63	0.552902	0.453969	0.388496	0.300412	0.246947
200.83	0.55352	0.454913	0.38935	0.301815	0.247875
201.03	0.553475	0.455124	0.389276	0.302445	0.247915
201.23	0.553607	0.455908	0.38988	0.302835	0.248312
201.43	0.55384	0.455583	0.390027	0.302822	0.248507
201.63	0.554426	0.456179	0.390203	0.303969	0.249128
201.83	0.554336	0.456469	0.390284	0.304073	0.249277
202.03	0.554272	0.456441	0.390458	0.303869	0.248928
202.23	0.554551	0.457117	0.390671	0.30365	0.248854
202.43	0.554778	0.457577	0.391031	0.304159	0.249104
202.63	0.554948	0.457236	0.391173	0.304087	0.248786
202.83	0.554965	0.457051	0.391029	0.304078	0.248611
203.03	0.555526	0.457449	0.391907	0.304129	0.24893
203.23	0.555164	0.457134	0.39162	0.303646	0.248429
203.43	0.555776	0.45779	0.392398	0.304023	0.248742
203.63	0.556079	0.457962	0.392867	0.303871	0.248763
203.83	0.55625	0.458159	0.393253	0.303756	0.248759
204.03	0.556475	0.458365	0.393557	0.303699	0.249038
204.23	0.557025	0.458521	0.393787	0.304259	0.249245
204.43	0.557513	0.459607	0.394474	0.304564	0.250005
204.63	0.557814	0.460453	0.39496	0.305364	0.250644
204.83	0.557676	0.460751	0.395167	0.305565	0.250903
205.03	0.55773	0.461155	0.395057	0.305567	0.251027
205.23	0.557728	0.461204	0.394814	0.305963	0.251197
205.43	0.558018	0.460569	0.394373	0.305875	0.250979
205.63	0.55811	0.460817	0.394038	0.305851	0.250533
205.83	0.55868	0.461289	0.39454	0.305784	0.250862
206.03	0.559181	0.461938	0.394837	0.306222	0.251054
206.23	0.559675	0.462029	0.395346	0.3068	0.251498
206.43	0.560001	0.46232	0.39577	0.307287	0.251841
206.63	0.560252	0.461938	0.396188	0.307523	0.25199
206.83	0.560339	0.462356	0.396536	0.307996	0.2521
207.03	0.560369	0.46267	0.396687	0.308189	0.252324
207.23	0.560476	0.462509	0.396144	0.308226	0.251862
207.43	0.560905	0.463146	0.396859	0.308913	0.251841
207.63	0.561263	0.463509	0.397144	0.308946	0.251959
207.83	0.562186	0.464193	0.397709	0.309398	0.252224
208.03	0.562795	0.464505	0.398268	0.309905	0.252747
208.23	0.563158	0.46506	0.39845	0.310348	0.253037
208.43	0.563147	0.465723	0.398744	0.310273	0.253304
208.63	0.563343	0.466354	0.399216	0.311184	0.253095
208.83	0.563316	0.466322	0.399054	0.310979	0.253147
209.03	0.562964	0.465881	0.398475	0.310844	0.252547
209.23	0.562781	0.465339	0.398151	0.310651	0.252225
209.43	0.563362	0.465111	0.398216	0.31018	0.251783
209.63	0.563385	0.465286	0.398713	0.310144	0.251598
209.83	0.564263	0.465665	0.399319	0.310657	0.252297
210.03	0.564392	0.466124	0.399879	0.311097	0.252563
210.23	0.564825	0.466417	0.400183	0.310966	0.253147
210.43	0.56565	0.467121	0.400859	0.311287	0.253698
210.63	0.566225	0.467293	0.401101	0.311655	0.253959
210.83	0.566598	0.467705	0.40121	0.311876	0.253714
211.03	0.566469	0.467867	0.401335	0.311786	0.253424
211.23	0.566443	0.46784	0.401039	0.311594	0.253029
211.43	0.566974	0.467973	0.401387	0.311885	0.253107
211.63	0.567623	0.468488	0.402003	0.311685	0.253373
211.83	0.568702	0.469378	0.402923	0.311905	0.254213
212.03	0.569041	0.469731	0.403435	0.312218	0.254714
212.23	0.569684	0.470054	0.403762	0.312634	0.255312
212.43	0.570329	0.470379	0.404485	0.313213	0.255934
212.63	0.570858	0.470835	0.404932	0.314086	0.256495
212.83	0.570898	0.470858	0.404786	0.313832	0.256873
213.03	0.570941	0.470804	0.404807	0.314267	0.256793
213.23	0.571788	0.471262	0.405404	0.315207	0.257839
213.43	0.572142	0.471386	0.405704	0.315497	0.258219
213.63	0.572162	0.471689	0.406016	0.31622	0.258931
213.83	0.572649	0.472195	0.406248	0.316735	0.259493
214.03	0.572702	0.472886	0.406756	0.3168	0.259516
214.23	0.573479	0.474183	0.407314	0.317351	0.259918
214.43	0.574188	0.474915	0.408154	0.318077	0.260394
214.63	0.573661	0.475042	0.407955	0.318154	0.260084
214.83	0.573358	0.475002	0.408285	0.318632	0.259741
215.03	0.573033	0.475156	0.408634	0.31856	0.259576
215.23	0.5734	0.474818	0.408375	0.31839	0.259538
215.43	0.574368	0.475547	0.408821	0.318449	0.259815
215.63	0.574846	0.476009	0.40913	0.318549	0.259853
215.83	0.575445	0.476045	0.409341	0.318607	0.260307
216.03	0.576093	0.476007	0.409447	0.318904	0.260503
216.23	0.576627	0.475781	0.409622	0.318893	0.260648
216.43	0.577058	0.475792	0.409938	0.318989	0.261377
216.63	0.576887	0.47585	0.409591	0.319038	0.261499
216.83	0.576753	0.475996	0.409473	0.318644	0.261344
217.03	0.576924	0.476353	0.409653	0.319078	0.26164
217.23	0.577063	0.476377	0.410142	0.319422	0.262054
217.43	0.576663	0.476433	0.410356	0.319062	0.262009
217.63	0.57667	0.476493	0.410378	0.318748	0.261996
217.83	0.577325	0.477545	0.410996	0.319392	0.261908
218.03	0.578497	0.479186	0.412162	0.320188	0.26265
218.23	0.57967	0.480616	0.413464	0.32139	0.263572
218.43	0.58012	0.480796	0.413898	0.321768	0.264086
218.63	0.580049	0.480824	0.414247	0.322088	0.263947
218.83	0.58071	0.481382	0.4152	0.322922	0.264202
219.03	0.580689	0.481427	0.415327	0.323096	0.264619
219.23	0.581324	0.482039	0.415702	0.323429	0.265175
219.43	0.582248	0.483046	0.416526	0.324713	0.265658
219.63	0.582726	0.482996	0.416562	0.325041	0.265547
219.83	0.583401	0.483216	0.416863	0.325283	0.265822
220.03	0.583615	0.484003	0.417523	0.326104	0.266127
220.23	0.583085	0.483507	0.417468	0.325904	0.265945
220.43	0.583017	0.483828	0.417378	0.326429	0.266518
220.63	0.582633	0.484016	0.417151	0.326763	0.266538
220.83	0.582368	0.484126	0.417526	0.327119	0.266499
221.03	0.582664	0.484388	0.417617	0.327183	0.266593
221.23	0.582718	0.484511	0.417679	0.327175	0.266417
221.43	0.58314	0.484864	0.417611	0.326972	0.266619
221.63	0.583701	0.485179	0.417376	0.327056	0.266455
221.83	0.584489	0.486104	0.418134	0.32808	0.266998
222.03	0.585195	0.486615	0.418468	0.328208	0.267829
222.23	0.585305	0.486252	0.418619	0.328127	0.268116
222.43	0.585441	0.486473	0.418515	0.327732	0.268242
222.63	0.585448	0.486181	0.418336	0.327401	0.268181
222.83	0.585695	0.486607	0.418749	0.327475	0.268738
223.03	0.586064	0.486603	0.418703	0.327442	0.26924
223.23	0.586653	0.486939	0.419208	0.327467	0.269405
223.43	0.587308	0.486916	0.419326	0.327474	0.269066
223.63	0.587569	0.486846	0.41905	0.326762	0.268481
223.83	0.587965	0.487246	0.419847	0.327086	0.268747
224.03	0.587665	0.487473	0.420562	0.327196	0.268831
224.23	0.587887	0.487053	0.420733	0.326835	0.268858
224.43	0.587727	0.48748	0.420537	0.3271	0.269104
224.63	0.58747	0.487448	0.420971	0.327317	0.269385
224.83	0.587725	0.487776	0.421202	0.327547	0.269441
225.03	0.588095	0.487978	0.421073	0.327356	0.269044
225.23	0.58806	0.48846	0.421266	0.327415	0.268957
225.43	0.588298	0.488772	0.421385	0.328055	0.269364
225.63	0.588248	0.489242	0.421633	0.328218	0.269325
225.83	0.588595	0.489614	0.42226	0.329178	0.270029
226.03	0.589165	0.490014	0.422052	0.329703	0.270467
226.23	0.589684	0.490407	0.422422	0.330202	0.270709
226.43	0.590152	0.490696	0.42225	0.330447	0.270398
226.63	0.590853	0.490983	0.421724	0.330875	0.270334
226.83	0.591108	0.491933	0.422318	0.331434	0.27061
227.03	0.59177	0.492503	0.42224	0.331914	0.270747
227.23	0.592332	0.492945	0.422563	0.332344	0.270812
227.43	0.592955	0.493871	0.423118	0.332568	0.270978
227.63	0.593302	0.494103	0.423487	0.332978	0.270791
227.83	0.59353	0.494212	0.424381	0.333165	0.270998
228.03	0.593265	0.494243	0.424956	0.333114	0.271119
228.23	0.593692	0.494369	0.42501	0.333041	0.271234
228.43	0.59365	0.494596	0.424758	0.333029	0.271399
228.63	0.59413	0.494609	0.425347	0.333353	0.271844
228.83	0.594295	0.494473	0.425104	0.332757	0.27146
229.03	0.594443	0.494815	0.425727	0.332928	0.27156
229.23	0.594743	0.495051	0.426185	0.332731	0.271879
229.43	0.595894	0.495665	0.427062	0.333418	0.272833
229.63	0.596281	0.495581	0.427604	0.333117	0.272951
229.83	0.597307	0.495695	0.428182	0.333813	0.273576
230.03	0.598014	0.495775	0.428615	0.334128	0.274018
230.23	0.598103	0.495797	0.42875	0.334102	0.274267
230.43	0.598343	0.495713	0.428637	0.334101	0.274214
230.63	0.598438	0.496887	0.428935	0.334311	0.274898
230.83	0.598629	0.497301	0.429752	0.334769	0.275614
231.03	0.598532	0.497933	0.429908	0.335066	0.27587
231.23	0.598512	0.498546	0.430418	0.335057	0.276082
231.43	0.598024	0.498927	0.430655	0.335339	0.276271
231.63	0.597923	0.498568	0.43068	0.335775	0.275698
231.83	0.597771	0.49893	0.431204	0.336196	0.275977
232.03	0.598032	0.499585	0.43188	0.336894	0.276441
232.23	0.598477	0.50026	0.431747	0.337301	0.276306
232.43	0.599042	0.501049	0.432374	0.338255	0.276816
232.63	0.599561	0.501785	0.432759	0.338978	0.277559
232.83	0.59969	0.502315	0.432999	0.338766	0.277473
233.03	0.6005	0.503377	0.433943	0.340012	0.27799
233.23	0.601473	0.503616	0.434196	0.340145	0.278038
233.43	0.60233	0.503841	0.434649	0.340209	0.278468
233.63	0.602897	0.503447	0.434972	0.340256	0.278255
233.83	0.603724	0.503927	0.435354	0.340763	0.27912
234.03	0.603667	0.50398	0.435742	0.340682	0.279257
234.23	0.603703	0.503933	0.435595	0.340306	0.27923
234.43	0.604364	0.503979	0.435931	0.340285	0.279302
234.63	0.604354	0.504791	0.436134	0.340086	0.279541
234.83	0.604442	0.504157	0.435885	0.339854	0.279388
235.03	0.603571	0.504282	0.435758	0.339134	0.279116
235.23	0.603913	0.504452	0.435695	0.33928	0.279248
235.43	0.603207	0.504021	0.435124	0.339273	0.278999
235.63	0.603211	0.503576	0.435022	0.33887	0.278159
235.83	0.603763	0.504187	0.435831	0.339812	0.278455
236.03	0.603784	0.504381	0.436463	0.340283	0.278815
236.23	0.603883	0.504738	0.436443	0.340912	0.278714
236.43	0.604384	0.505189	0.43698	0.341515	0.2794
236.63	0.604534	0.505863	0.437044	0.342274	0.279966
236.83	0.604678	0.50571	0.437261	0.342863	0.280036
237.03	0.605281	0.506299	0.437883	0.34395	0.280568
237.23	0.606347	0.506358	0.43817	0.344234	0.281066
237.43	0.606884	0.506725	0.438922	0.345188	0.281726
237.63	0.607502	0.507087	0.439421	0.345757	0.282199
237.83	0.607885	0.50792	0.440018	0.34638	0.282884
238.03	0.608221	0.508499	0.440791	0.346738	0.283062
238.23	0.608778	0.508466	0.440633	0.346949	0.283397
238.43	0.609879	0.509425	0.441031	0.347549	0.284607
238.63	0.610047	0.510334	0.441297	0.347664	0.285074
238.83	0.610177	0.510152	0.44137	0.347793	0.285265
239.03	0.610792	0.51041	0.441829	0.347469	0.285664
239.23	0.611046	0.510461	0.441734	0.347059	0.2855
239.43	0.61054	0.509945	0.441287	0.346089	0.28477
239.63	0.610672	0.510379	0.441852	0.346121	0.284684
239.83	0.61107	0.511124	0.442489	0.346801	0.285237
240.03	0.610654	0.51098	0.442419	0.346325	0.284961
240.23	0.610795	0.511016	0.442233	0.346211	0.284548
240.43	0.610297	0.510862	0.442138	0.345702	0.284331
240.63	0.610062	0.51054	0.441942	0.346031	0.283991
240.83	0.610222	0.510228	0.441777	0.346158	0.283719
241.03	0.610207	0.510514	0.442328	0.346719	0.28369
241.23	0.610802	0.51064	0.442446	0.347394	0.283801
241.43	0.610651	0.510875	0.442976	0.348359	0.283845
241.63	0.610636	0.510797	0.443249	0.348278	0.283726
241.83	0.610975	0.510746	0.443684	0.348565	0.283675
242.03	0.610955	0.51081	0.443808	0.348749	0.283776
242.23	0.611482	0.511157	0.444125	0.348987	0.284689
242.43	0.61299	0.512646	0.445107	0.349853	0.286095
242.63	0.612959	0.513161	0.445327	0.350057	0.286142
242.83	0.613529	0.513743	0.445913	0.350527	0.286519
243.03	0.614114	0.513735	0.446162	0.350345	0.286616
243.23	0.614073	0.514527	0.446584	0.350586	0.286945
243.43	0.614106	0.515085	0.446845	0.351011	0.287216
243.63	0.614416	0.516457	0.447306	0.351614	0.287889
243.83	0.615335	0.517034	0.44751	0.351783	0.287979
244.03	0.615968	0.517728	0.447923	0.352009	0.288205
244.23	0.617213	0.518149	0.448344	0.352548	0.28859
244.43	0.618073	0.518481	0.448695	0.352927	0.288891
244.63	0.619179	0.518962	0.449243	0.354347	0.289318
244.83	0.619623	0.518896	0.449529	0.355044	0.289337
245.03	0.619852	0.518756	0.450088	0.355776	0.289743
245.23	0.620451	0.518761	0.449999	0.356053	0.289966
245.43	0.620776	0.518798	0.45072	0.356137	0.290262
245.63	0.620931	0.518618	0.450885	0.355691	0.290256
245.83	0.620792	0.518295	0.45072	0.355323	0.290117
246.03	0.620805	0.518675	0.450992	0.355217	0.29049
246.23	0.62145	0.519459	0.451595	0.355186	0.291558
246.43	0.621848	0.5203	0.451774	0.355289	0.291993
246.63	0.621094	0.52049	0.451399	0.354872	0.291764
246.83	0.621005	0.520599	0.451625	0.354749	0.291659
247.03	0.620368	0.520381	0.451278	0.354199	0.291569
247.23	0.620225	0.521143	0.451504	0.354779	0.291983
247.43	0.620016	0.521538	0.451071	0.354846	0.291798
247.63	0.619497	0.521955	0.450991	0.354758	0.291546
247.83	0.619459	0.522153	0.451409	0.355165	0.291468
248.03	0.619691	0.522558	0.45177	0.35534	0.291491
248.23	0.620568	0.522574	0.452308	0.356232	0.29151
248.43	0.620665	0.522549	0.45282	0.356634	0.291907
248.63	0.621148	0.522454	0.453092	0.3574	0.292098
248.83	0.621033	0.521713	0.453319	0.357346	0.292027
249.03	0.621967	0.522575	0.454037	0.357987	0.292813
249.23	0.622287	0.522668	0.454397	0.358466	0.293245
249.43	0.623188	0.522922	0.455364	0.358978	0.293785
249.63	0.623309	0.522672	0.455118	0.35881	0.293698
249.83	0.623095	0.522398	0.455279	0.358527	0.294018
250.03	0.623298	0.522468	0.455618	0.358179	0.294362
250.23	0.623946	0.522916	0.456428	0.358418	0.295051
250.43	0.624129	0.523317	0.456751	0.358276	0.295243
250.63	0.624386	0.523657	0.456973	0.357939	0.295355
250.83	0.625191	0.524279	0.457203	0.35822	0.295732
251.03	0.625615	0.524512	0.45711	0.35828	0.296299
251.23	0.625609	0.525162	0.457069	0.358491	0.29653
251.43	0.625052	0.525226	0.456816	0.358427	0.296467
251.63	0.624156	0.525057	0.456739	0.358089	0.296221
251.83	0.624514	0.525245	0.456804	0.358166	0.29621
252.03	0.624979	0.52513	0.456621	0.357755	0.296218
252.23	0.625345	0.524959	0.45657	0.358364	0.29657
252.43	0.625958	0.525253	0.456647	0.358466	0.297255
252.63	0.626736	0.525937	0.456933	0.358993	0.297442
252.83	0.626762	0.526331	0.457071	0.358923	0.297623
253.03	0.627409	0.527153	0.457113	0.359485	0.298255
253.23	0.626709	0.526176	0.456275	0.359308	0.297657
253.43	0.627209	0.52631	0.456078	0.359145	0.297287
253.63	0.626775	0.526151	0.45575	0.358997	0.297074
253.83	0.627209	0.526012	0.456047	0.359304	0.296858
254.03	0.627599	0.526314	0.456464	0.359788	0.296421
254.23	0.628937	0.527075	0.458	0.360969	0.296926
254.43	0.629529	0.527359	0.458432	0.361681	0.296918
254.63	0.630327	0.527872	0.458899	0.362086	0.297226
254.83	0.631473	0.528574	0.459437	0.362755	0.297655
255.03	0.631824	0.528979	0.460073	0.363122	0.298199
255.23	0.631698	0.529193	0.460219	0.362832	0.298019
255.43	0.632454	0.529225	0.461092	0.363583	0.298842
255.63	0.63351	0.52983	0.461791	0.36449	0.299382
255.83	0.634166	0.5302	0.462582	0.364901	0.299704
256.03	0.634072	0.530342	0.463075	0.36524	0.300179
256.23	0.633991	0.530819	0.463431	0.36536	0.300678
256.43	0.634044	0.531411	0.463753	0.365231	0.300989
256.63	0.63349	0.531729	0.464021	0.364937	0.300914
256.83	0.633239	0.531833	0.463805	0.364658	0.301179
257.03	0.633267	0.532182	0.463826	0.365224	0.301356
257.23	0.632715	0.531726	0.463063	0.36507	0.300771
257.43	0.633183	0.53183	0.463404	0.365181	0.300596
257.63	0.63356	0.531854	0.463543	0.36547	0.300793
257.83	0.634381	0.532167	0.463942	0.366194	0.300801
258.03	0.635195	0.532901	0.464779	0.367422	0.300804
258.23	0.635878	0.533155	0.46518	0.368005	0.301357
258.43	0.636125	0.533482	0.464965	0.368734	0.301638
258.63	0.636898	0.534199	0.465206	0.368912	0.302296
258.83	0.637726	0.534686	0.465292	0.369213	0.30251
259.03	0.638309	0.535154	0.465458	0.369422	0.302537
259.23	0.638723	0.53525	0.465469	0.369062	0.302653
259.43	0.639573	0.535971	0.466179	0.369991	0.30365
259.63	0.639719	0.536338	0.466161	0.370149	0.303322
259.83	0.640034	0.536843	0.466892	0.370114	0.303651
260.03	0.639827	0.537217	0.467088	0.369945	0.304009
260.23	0.639814	0.537359	0.467476	0.369497	0.304259
260.43	0.639644	0.537494	0.467842	0.369379	0.304388
260.63	0.639589	0.537568	0.468171	0.369328	0.304602
260.83	0.639297	0.537443	0.468153	0.369081	0.304741
261.03	0.639321	0.537835	0.46884	0.369433	0.304979
261.23	0.639082	0.537422	0.468567	0.36943	0.305215
261.43	0.639607	0.537503	0.4695	0.369783	0.30554
261.63	0.639821	0.537989	0.469674	0.370025	0.305972
261.83	0.639885	0.538177	0.470098	0.370634	0.306052
262.03	0.640498	0.538263	0.470438	0.371494	0.305985
262.23	0.640296	0.538339	0.470125	0.371636	0.306352
262.43	0.640992	0.538821	0.470202	0.372543	0.306642
262.63	0.641947	0.539349	0.47058	0.373005	0.306848
262.83	0.642108	0.539848	0.470488	0.373261	0.306715
263.03	0.642785	0.540176	0.470733	0.373201	0.306553
263.23	0.643225	0.54071	0.471185	0.373864	0.307322
263.43	0.64397	0.541212	0.471364	0.374653	0.307608
263.63	0.644535	0.541902	0.47137	0.374669	0.307646
263.83	0.645729	0.542872	0.472122	0.375664	0.30841
264.03	0.645201	0.543196	0.472121	0.375505	0.30823
264.23	0.645186	0.543156	0.472521	0.37532	0.30829
264.43	0.645052	0.543229	0.472524	0.375293	0.308275
264.63	0.644632	0.543083	0.472458	0.374699	0.308221
264.83	0.644313	0.54324	0.472887	0.374729	0.308444
265.03	0.644401	0.543602	0.473445	0.375179	0.309032
265.23	0.644266	0.543729	0.473823	0.375456	0.309083
265.43	0.644802	0.544243	0.474763	0.37577	0.309603
265.63	0.644783	0.544486	0.474938	0.376277	0.309742
265.83	0.645326	0.544937	0.475702	0.3769	0.309806
266.03	0.646111	0.545487	0.476324	0.377626	0.310393
266.23	0.646431	0.546069	0.476582	0.37761	0.310865
266.43	0.64723	0.546482	0.477002	0.377848	0.310821
266.63	0.647495	0.546388	0.477312	0.377697	0.310883
266.83	0.647117	0.546229	0.476905	0.377365	0.310573
267.03	0.647762	0.545968	0.477067	0.377527	0.310356
267.23	0.647758	0.546539	0.477364	0.378161	0.310965
267.43	0.648126	0.546636	0.477009	0.377829	0.310969
267.63	0.648847	0.547407	0.477556	0.377987	0.311676
267.83	0.64946	0.547623	0.478208	0.378419	0.31198
268.03	0.64962	0.547954	0.478579	0.37786	0.312061
268.23	0.649806	0.547304	0.47836	0.377502	0.312032
268.43	0.649702	0.547424	0.478213	0.377534	0.312032
268.63	0.649971	0.547593	0.478459	0.377559	0.312667
268.83	0.650059	0.547735	0.478978	0.37798	0.31325
269.03	0.649991	0.548436	0.479185	0.377787	0.313563
269.23	0.65028	0.549119	0.47973	0.378778	0.313719
269.43	0.650823	0.549794	0.480058	0.379743	0.314723
269.63	0.651447	0.550592	0.480915	0.380735	0.315548
269.83	0.651884	0.550979	0.481181	0.380744	0.315803
270.03	0.651626	0.551175	0.480909	0.380633	0.315848
270.23	0.651916	0.551268	0.480599	0.380751	0.315526
270.43	0.651996	0.551454	0.480798	0.38129	0.315388
270.63	0.651411	0.550946	0.480479	0.38123	0.315672
270.83	0.650897	0.550723	0.480112	0.380932	0.315197
271.03	0.651342	0.551078	0.480835	0.381378	0.315213
271.23	0.651732	0.551647	0.481266	0.381358	0.315475
271.43	0.652348	0.551277	0.48156	0.381158	0.315215
271.63	0.652778	0.551795	0.482674	0.381408	0.315355
271.83	0.652878	0.551549	0.482715	0.380714	0.314922
272.03	0.653306	0.55142	0.482457	0.3801	0.314476
272.23	0.652566	0.550748	0.481823	0.379766	0.313672
272.43	0.653307	0.551169	0.481845	0.380613	0.313454
272.63	0.653752	0.55164	0.482106	0.380573	0.31362
272.83	0.653813	0.552175	0.482294	0.380615	0.31353
273.03	0.654505	0.553197	0.482556	0.380804	0.313671
273.23	0.655232	0.55352	0.482899	0.381822	0.313998
273.43	0.655531	0.55366	0.483226	0.382168	0.314427
273.63	0.655953	0.554084	0.483577	0.38236	0.315055
273.83	0.656536	0.554306	0.48373	0.382345	0.315117
274.03	0.657057	0.554904	0.483687	0.382899	0.315609
274.23	0.657407	0.555413	0.483644	0.383537	0.316132
274.43	0.657524	0.555854	0.484316	0.383839	0.316889
274.63	0.657745	0.555994	0.484667	0.383861	0.317244
274.83	0.65832	0.556215	0.485247	0.383948	0.317238
275.03	0.65899	0.556503	0.485945	0.384708	0.317507
275.23	0.659075	0.55663	0.486027	0.384871	0.317968
275.43	0.658489	0.556284	0.485738	0.384757	0.317733
275.63	0.658241	0.556597	0.485998	0.384754	0.318065
275.83	0.658363	0.556713	0.486372	0.385015	0.318443
276.03	0.658539	0.556748	0.486504	0.385428	0.318438
276.23	0.658641	0.556814	0.486555	0.38584	0.318483
276.43	0.660181	0.557687	0.487123	0.387049	0.31901
276.63	0.660325	0.557699	0.487698	0.387182	0.318991
276.83	0.660598	0.558275	0.488205	0.387754	0.319458
277.03	0.661383	0.559063	0.488913	0.388292	0.320011
277.23	0.661639	0.558919	0.489055	0.388731	0.320164
277.43	0.661712	0.558959	0.489531	0.388721	0.320271
277.63	0.661935	0.558731	0.489528	0.388698	0.32071
277.83	0.662408	0.558876	0.489925	0.388551	0.320656
278.03	0.662312	0.559219	0.489585	0.388491	0.320725
278.23	0.661923	0.559514	0.489643	0.388314	0.320227
278.43	0.662336	0.559909	0.490087	0.387979	0.320451
278.63	0.662567	0.559996	0.490002	0.387773	0.320302
278.83	0.662198	0.559625	0.48968	0.387604	0.320151
279.03	0.662096	0.559364	0.489352	0.387377	0.319986
279.23	0.662116	0.559687	0.489261	0.387279	0.320307
279.43	0.662394	0.559822	0.489123	0.387539	0.319881
279.63	0.66306	0.56031	0.489942	0.388147	0.320309
279.83	0.663632	0.560831	0.490896	0.388942	0.320754
280.03	0.663911	0.560379	0.491027	0.388873	0.320777
280.23	0.664699	0.56093	0.491313	0.389312	0.321288
280.43	0.665238	0.561634	0.492174	0.389809	0.321575
280.63	0.665407	0.561812	0.492613	0.390068	0.321288
280.83	0.666133	0.563149	0.493531	0.391133	0.322654
281.03	0.666977	0.563911	0.493729	0.391888	0.323339
281.23	0.667733	0.564039	0.494286	0.391986	0.323552
281.43	0.667979	0.564361	0.494846	0.392396	0.323799
281.63	0.667704	0.564026	0.494691	0.392336	0.323972
281.83	0.667727	0.565	0.495435	0.392778	0.324347
282.03	0.667529	0.565348	0.495347	0.392845	0.324618
282.23	0.66736	0.56532	0.495024	0.392619	0.324583
282.43	0.666874	0.565053	0.494605	0.391863	0.324287
282.63	0.666104	0.564478	0.494179	0.391542	0.324173
282.83	0.665877	0.563662	0.49391	0.391572	0.323567
283.03	0.666039	0.563491	0.493932	0.39166	0.323721
283.23	0.666725	0.563652	0.494443	0.392309	0.324206
283.43	0.667509	0.563945	0.494732	0.39272	0.324191
283.63	0.668023	0.564255	0.495551	0.39322	0.325121
283.83	0.668053	0.564523	0.496246	0.393375	0.325708
284.03	0.66816	0.565071	0.496654	0.393411	0.326017
284.23	0.668985	0.56656	0.497258	0.39452	0.326889
284.43	0.668919	0.56749	0.49783	0.395163	0.327021
284.63	0.669247	0.568224	0.498074	0.395726	0.327235
284.83	0.669833	0.568969	0.498452	0.396698	0.328076
285.03	0.669653	0.569116	0.497821	0.396548	0.327646
285.23	0.669674	0.569279	0.498071	0.396907	0.327321
285.43	0.669213	0.569582	0.498046	0.397874	0.327377
285.63	0.669259	0.570152	0.498406	0.398005	0.327792
285.83	0.669992	0.571065	0.499111	0.398803	0.328153
286.03	0.669975	0.570919	0.498586	0.398241	0.328114
286.23	0.670172	0.570776	0.498362	0.398063	0.328027
286.43	0.670057	0.570397	0.498442	0.397887	0.328041
286.63	0.669799	0.569814	0.498418	0.397764	0.328035
286.83	0.670466	0.56958	0.498609	0.398113	0.327606
287.03	0.671204	0.569823	0.499236	0.398497	0.328447
287.23	0.672542	0.56948	0.500268	0.398561	0.329131
287.43	0.673582	0.569893	0.500778	0.39867	0.329884
287.63	0.673769	0.569888	0.501159	0.398796	0.3304
287.83	0.674594	0.570077	0.501706	0.398504	0.330401
288.03	0.675368	0.571119	0.502278	0.398837	0.330514
288.23	0.675753	0.571235	0.502629	0.399505	0.330639
288.43	0.675908	0.571546	0.50296	0.399378	0.33063
288.63	0.676134	0.571828	0.502998	0.398882	0.330288
288.83	0.676292	0.571962	0.502936	0.399195	0.330411
289.03	0.676095	0.571787	0.502624	0.399027	0.330205
289.23	0.676731	0.572593	0.503222	0.399743	0.33059
289.43	0.676882	0.572864	0.503496	0.399599	0.330371
289.63	0.677289	0.573521	0.503703	0.399484	0.330763
289.83	0.677491	0.574078	0.504229	0.399913	0.330866
290.03	0.677174	0.574301	0.50398	0.399523	0.330788
290.23	0.677034	0.574871	0.504244	0.400058	0.331148
290.43	0.677653	0.575608	0.505083	0.40108	0.33192
290.63	0.677826	0.575736	0.505163	0.401612	0.332153
290.83	0.678613	0.576338	0.5057	0.403007	0.332972
291.03	0.679388	0.576731	0.506215	0.404064	0.334308
291.23	0.679584	0.576606	0.506393	0.404066	0.334751
291.43	0.680591	0.577617	0.506847	0.405145	0.335405
291.63	0.68055	0.577478	0.506722	0.404884	0.335307
291.83	0.681888	0.578032	0.507245	0.405156	0.335411
292.03	0.682044	0.579051	0.507781	0.406312	0.335915
292.23	0.682192	0.579153	0.508119	0.406834	0.336022
292.43	0.682764	0.58008	0.508883	0.407137	0.336686
292.63	0.68265	0.580027	0.508928	0.40717	0.336571
292.83	0.682708	0.57993	0.509344	0.407274	0.336429
293.03	0.682767	0.579965	0.509401	0.406868	0.335931
293.23	0.682666	0.57995	0.509466	0.406766	0.335458
293.43	0.681922	0.57932	0.509132	0.405861	0.33453
293.63	0.681869	0.579704	0.509465	0.406092	0.334995
293.83	0.681582	0.579819	0.509816	0.405955	0.335023
294.03	0.681692	0.580121	0.50981	0.4054	0.335045
294.23	0.682238	0.580546	0.510359	0.405942	0.335939
294.43	0.683168	0.580784	0.51067	0.406611	0.336651
294.63	0.683389	0.58064	0.510537	0.406586	0.336709
294.83	0.683903	0.580935	0.510815	0.407087	0.337451
295.03	0.68416	0.581204	0.510714	0.406998	0.337671
295.23	0.684555	0.581444	0.51116	0.407062	0.337604
295.43	0.685477	0.581963	0.511513	0.407643	0.33803
295.63	0.685766	0.582393	0.511441	0.407428	0.33793
295.83	0.686511	0.5834	0.511767	0.407811	0.33783
296.03	0.686327	0.583435	0.511537	0.408401	0.338012
296.23	0.686526	0.583523	0.511554	0.408397	0.338166
296.43	0.686785	0.583863	0.512222	0.408866	0.338814
296.63	0.686457	0.583761	0.511758	0.408652	0.33845
296.83	0.686278	0.583695	0.511649	0.408416	0.338033
297.03	0.685706	0.583535	0.511321	0.408342	0.337887
297.23	0.685337	0.583439	0.511283	0.408497	0.337851
297.43	0.685433	0.583393	0.511236	0.408589	0.337898
297.63	0.685598	0.583932	0.511386	0.408878	0.338227
297.83	0.685795	0.583685	0.511526	0.409037	0.338334
298.03	0.686372	0.584051	0.51189	0.409694	0.339015
298.23	0.686407	0.583758	0.512099	0.410355	0.339597
298.43	0.686325	0.583298	0.51216	0.410243	0.339542
298.63	0.686291	0.583349	0.512637	0.410339	0.33988
298.83	0.686232	0.583408	0.513063	0.410328	0.340608
299.03	0.686533	0.583964	0.513803	0.410675	0.34053
299.23	0.686807	0.583991	0.514391	0.41065	0.340371
299.43	0.687083	0.58401	0.514387	0.410219	0.340156
299.63	0.687746	0.584673	0.515092	0.410433	0.340195
299.83	0.688045	0.585003	0.51549	0.410365	0.340784
300.03	0.687763	0.584866	0.515362	0.41036	0.340958
300.23	0.687983	0.58581	0.51591	0.410613	0.341643
300.43	0.688096	0.58621	0.516226	0.410755	0.341482
300.63	0.687667	0.586454	0.515909	0.410626	0.341189
300.83	0.688007	0.58639	0.516409	0.411155	0.340965
301.03	0.688068	0.58698	0.516492	0.411309	0.340703
301.23	0.68846	0.587525	0.516189	0.411697	0.340492
301.43	0.689184	0.587732	0.515833	0.411785	0.339857
301.63	0.689715	0.588519	0.516375	0.412515	0.340252
301.83	0.689751	0.588689	0.516557	0.413154	0.340519
302.03	0.68981	0.589096	0.517098	0.413659	0.341036
302.23	0.689385	0.588755	0.517324	0.413615	0.341038
302.43	0.689656	0.588776	0.517938	0.413584	0.340999
302.63	0.689951	0.589239	0.51868	0.414333	0.341847
302.83	0.690553	0.589338	0.519295	0.414881	0.342126
303.03	0.691277	0.589673	0.519802	0.414986	0.342164
303.23	0.691552	0.589816	0.519927	0.415237	0.342344
303.43	0.692586	0.590323	0.520724	0.415787	0.343097
303.63	0.693702	0.591237	0.521815	0.416696	0.3442
303.83	0.693928	0.59164	0.522028	0.417259	0.345042
304.03	0.693948	0.59185	0.522331	0.417879	0.345412
304.23	0.694813	0.592496	0.5228	0.419009	0.346305
304.43	0.694901	0.592393	0.522974	0.419157	0.346185
304.63	0.695105	0.592799	0.523312	0.419809	0.346864
304.83	0.695359	0.592573	0.523525	0.419825	0.346676
305.03	0.695692	0.593183	0.523505	0.42027	0.346935
305.23	0.696064	0.593566	0.523397	0.420598	0.347035
305.43	0.69628	0.593836	0.523264	0.420143	0.346709
305.63	0.69626	0.594483	0.523776	0.420289	0.347114
305.83	0.695644	0.594461	0.523451	0.41992	0.346884
306.03	0.695643	0.59382	0.523633	0.419442	0.346677
306.23	0.695329	0.593139	0.523011	0.419203	0.346302
306.43	0.695532	0.593334	0.522949	0.419235	0.346007
306.63	0.696374	0.59373	0.523353	0.41965	0.346548
306.83	0.69693	0.594222	0.523425	0.419417	0.346654
307.03	0.696882	0.594573	0.523324	0.418773	0.346614
307.23	0.697353	0.595408	0.523701	0.419247	0.346891
307.43	0.698148	0.595598	0.524037	0.419492	0.347025
307.63	0.698454	0.595815	0.52396	0.419824	0.347269
307.83	0.698296	0.5958	0.523699	0.420029	0.347306
308.03	0.697911	0.595752	0.524074	0.42021	0.347397
308.23	0.698327	0.596233	0.524015	0.420684	0.347673
308.43	0.698306	0.596565	0.524408	0.420776	0.347861
308.63	0.698843	0.59702	0.525176	0.421586	0.348537
308.83	0.699136	0.597378	0.525902	0.422181	0.348547
309.03	0.700065	0.597573	0.525904	0.423042	0.348933
309.23	0.700485	0.597505	0.526028	0.423217	0.349127
309.43	0.700464	0.59772	0.525832	0.423075	0.34925
309.63	0.700608	0.59796	0.526546	0.423799	0.349351
309.83	0.700486	0.59753	0.526758	0.423505	0.349395
310.03	0.700861	0.597398	0.526903	0.423232	0.349421
310.23	0.701527	0.597622	0.526981	0.4235	0.349741
310.43	0.702062	0.598188	0.527507	0.423884	0.350314
310.63	0.703009	0.59827	0.528249	0.424408	0.351003
310.83	0.703452	0.598455	0.528563	0.424454	0.351034
311.03	0.703479	0.598148	0.528258	0.423997	0.350827
311.23	0.703774	0.598251	0.528038	0.423848	0.350494
311.43	0.703976	0.598452	0.528012	0.424179	0.350736
311.63	0.704034	0.59873	0.528	0.424259	0.350938
311.83	0.704318	0.59934	0.52848	0.424552	0.351243
312.03	0.703659	0.599041	0.528262	0.423953	0.350838
312.23	0.704157	0.599637	0.528148	0.424119	0.351374
312.43	0.704717	0.600238	0.528644	0.424351	0.35177
312.63	0.704846	0.600545	0.528744	0.424681	0.352089
312.83	0.704962	0.600525	0.528637	0.424532	0.35203
313.03	0.705046	0.600393	0.528737	0.424696	0.352561
313.23	0.704996	0.600873	0.529308	0.425156	0.352946
313.43	0.704815	0.60124	0.529114	0.425091	0.353109
313.63	0.704969	0.601649	0.529838	0.425046	0.352859
313.83	0.705686	0.601825	0.530421	0.424935	0.353208
314.03	0.706175	0.602533	0.530726	0.425553	0.353784
314.23	0.706122	0.602318	0.530935	0.425789	0.353741
314.43	0.706357	0.60266	0.531666	0.426402	0.354
314.63	0.706971	0.602758	0.532212	0.426908	0.354339
314.83	0.7075	0.603097	0.532928	0.426993	0.354368
315.03	0.70722	0.603462	0.53281	0.426823	0.354109
315.23	0.707466	0.603896	0.533578	0.427334	0.354139
315.43	0.7079	0.604507	0.534108	0.42739	0.354579
315.63	0.708523	0.604913	0.534282	0.427448	0.354232
315.83	0.708986	0.605199	0.53463	0.427578	0.354345
316.03	0.708439	0.605088	0.534494	0.427018	0.353789
316.23	0.708648	0.605786	0.534761	0.427949	0.354704
316.43	0.70944	0.606826	0.535443	0.428912	0.355216
316.63	0.708901	0.606695	0.535141	0.428978	0.355485
316.83	0.708835	0.606813	0.535399	0.429414	0.355997
317.03	0.708951	0.607309	0.535329	0.43006	0.356621
317.23	0.70896	0.607366	0.534469	0.430688	0.356753
317.43	0.709371	0.608052	0.534411	0.431676	0.357317
317.63	0.709788	0.608841	0.534882	0.432087	0.357756
317.83	0.710494	0.609381	0.535253	0.433101	0.358552
318.03	0.710705	0.610168	0.535742	0.433658	0.358717
318.23	0.710476	0.610047	0.53557	0.433178	0.358616
318.43	0.71131	0.610891	0.536443	0.434133	0.359306
318.63	0.711513	0.611209	0.536764	0.434149	0.359566
318.83	0.71246	0.611837	0.537504	0.434527	0.359875
319.03	0.712773	0.612203	0.537577	0.434692	0.359957
319.23	0.713069	0.611566	0.538242	0.434492	0.359867
319.43	0.714011	0.611773	0.53842	0.433901	0.359835
319.63	0.714726	0.611858	0.538777	0.433847	0.360025
319.83	0.715165	0.611786	0.539579	0.434347	0.360913
320.03	0.715251	0.611976	0.540049	0.434373	0.361551
320.23	0.715633	0.61208	0.540484	0.434757	0.362308
320.43	0.716201	0.612005	0.541077	0.434694	0.362646
320.63	0.716203	0.611516	0.540857	0.434269	0.36293
320.83	0.716312	0.611537	0.540976	0.434437	0.363196
321.03	0.71655	0.61167	0.540524	0.43414	0.363272
321.23	0.715907	0.611481	0.539931	0.434122	0.363044
321.43	0.715812	0.611806	0.540251	0.433995	0.36287
321.63	0.715293	0.611276	0.53965	0.433182	0.362436
321.83	0.714688	0.610679	0.539393	0.433087	0.361689
322.03	0.71436	0.610571	0.539329	0.432645	0.360569
322.23	0.713747	0.610105	0.538613	0.432215	0.359944
322.43	0.713645	0.61012	0.53885	0.433136	0.359846
322.63	0.713639	0.610167	0.538711	0.433174	0.35952
322.83	0.71421	0.61058	0.538901	0.433859	0.359839
323.03	0.713844	0.610475	0.53887	0.434091	0.359616
323.23	0.713684	0.610437	0.539209	0.434362	0.359242
323.43	0.714772	0.611527	0.539653	0.435288	0.360126
323.63	0.715108	0.611737	0.539794	0.435712	0.360753
323.83	0.715997	0.612688	0.540821	0.436829	0.362013
324.03	0.716611	0.613552	0.5413	0.437215	0.362661
324.23	0.717587	0.613926	0.542175	0.43766	0.362661
324.43	0.71837	0.614488	0.543009	0.438159	0.363267
324.63	0.718686	0.615044	0.543328	0.438488	0.363612
324.83	0.718493	0.615042	0.543476	0.438686	0.363805
325.03	0.718488	0.614984	0.542864	0.438432	0.363689
325.23	0.718596	0.614999	0.543111	0.438179	0.363587
325.43	0.718542	0.615038	0.54364	0.438224	0.363681
325.63	0.718425	0.614945	0.543613	0.438452	0.36406
325.83	0.718583	0.615154	0.544405	0.43852	0.363969
326.03	0.719298	0.615329	0.544778	0.43861	0.364028
326.23	0.719497	0.615634	0.544766	0.439012	0.36427
326.43	0.719387	0.615754	0.545199	0.439002	0.364369
326.63	0.720012	0.616288	0.54566	0.438846	0.364389
326.83	0.72042	0.616604	0.545859	0.438995	0.364415
327.03	0.720987	0.616885	0.545916	0.439595	0.364754
327.23	0.72161	0.617235	0.546037	0.440081	0.364788
327.43	0.722062	0.617612	0.546592	0.440593	0.365598
327.63	0.722376	0.617931	0.546792	0.440539	0.365945
327.83	0.722924	0.618686	0.547245	0.44114	0.366127
328.03	0.72396	0.619332	0.547955	0.441864	0.366126
328.23	0.724787	0.619962	0.548839	0.442913	0.366266
328.43	0.725143	0.620081	0.549057	0.443383	0.36686
328.63	0.724587	0.619822	0.548497	0.443392	0.366735
328.83	0.724355	0.619609	0.548335	0.443117	0.366619
329.03	0.724517	0.619877	0.54802	0.443235	0.366937
329.23	0.724645	0.620326	0.548328	0.443337	0.367146
329.43	0.724294	0.620837	0.548662	0.443411	0.367701
329.63	0.724234	0.621099	0.548584	0.443245	0.367685
329.83	0.723479	0.621127	0.548887	0.442942	0.367189
330.03	0.723246	0.621317	0.548502	0.442818	0.366993
330.23	0.722765	0.621943	0.548688	0.442968	0.366719
330.43	0.722392	0.622159	0.548936	0.442717	0.366623
330.63	0.722751	0.622611	0.549154	0.443251	0.367067
330.83	0.722778	0.622531	0.549009	0.443414	0.367067
331.03	0.723464	0.622856	0.549128	0.443996	0.367694
331.23	0.723065	0.622646	0.549398	0.443849	0.36785
331.43	0.723305	0.623036	0.55039	0.444422	0.368407
331.63	0.724539	0.62377	0.551379	0.445339	0.368925
331.83	0.724935	0.623834	0.551722	0.446068	0.368927
332.03	0.726277	0.624158	0.552715	0.447017	0.369766
332.23	0.727452	0.624369	0.552994	0.447416	0.370232
332.43	0.7281	0.623742	0.553121	0.447221	0.370589
332.63	0.727969	0.623303	0.55299	0.446735	0.37066
332.83	0.728126	0.622563	0.553145	0.446234	0.370725
333.03	0.729202	0.622834	0.553384	0.44691	0.371278
333.23	0.729887	0.623075	0.553628	0.447215	0.371718
333.43	0.730254	0.623316	0.554324	0.447525	0.372039
333.63	0.730139	0.623289	0.554147	0.448148	0.371374
333.83	0.729903	0.623779	0.554767	0.448766	0.371634
334.03	0.730265	0.624556	0.554698	0.449203	0.37169
334.23	0.730409	0.624921	0.554862	0.449625	0.371608
334.43	0.730059	0.625516	0.554456	0.449564	0.371909
334.63	0.729977	0.62559	0.554208	0.449651	0.37212
334.83	0.729931	0.625957	0.554332	0.449445	0.372301
335.03	0.730119	0.626543	0.554724	0.449478	0.372794
335.23	0.729292	0.626479	0.554658	0.449357	0.372643
335.43	0.729525	0.627001	0.554862	0.449581	0.372619
335.63	0.729418	0.627429	0.55452	0.449393	0.372647
335.83	0.728849	0.627211	0.553823	0.448922	0.372254
336.03	0.729471	0.627205	0.553759	0.448381	0.372321
336.23	0.730163	0.627385	0.554097	0.447516	0.372266
336.43	0.729105	0.626483	0.553826	0.446874	0.37183
336.63	0.728441	0.626043	0.553785	0.446375	0.371633
336.83	0.728802	0.626278	0.554251	0.446717	0.371948
337.03	0.729473	0.626478	0.554829	0.447203	0.37206
337.23	0.730159	0.626819	0.5557	0.447781	0.372507
337.43	0.730553	0.627193	0.55673	0.448534	0.372387
337.63	0.730821	0.627407	0.556966	0.448941	0.372347
337.83	0.731278	0.627861	0.557449	0.449167	0.372664
338.03	0.731825	0.628086	0.557695	0.449503	0.372528
338.23	0.733084	0.628865	0.558406	0.450314	0.373026
338.43	0.733555	0.629795	0.5591	0.451172	0.373909
338.63	0.734387	0.630043	0.559722	0.451875	0.374759
338.83	0.735421	0.631026	0.560396	0.452682	0.375535
339.03	0.736071	0.631494	0.560495	0.452944	0.37618
339.23	0.736457	0.631848	0.56046	0.453594	0.376348
339.43	0.73747	0.632481	0.560738	0.454028	0.377046
339.63	0.737766	0.633131	0.561092	0.454522	0.377699
339.83	0.73743	0.63257	0.560519	0.454528	0.377311
340.03	0.737989	0.632929	0.560183	0.454535	0.377569
340.23	0.738257	0.633271	0.560559	0.454826	0.377881
340.43	0.7377	0.63267	0.560016	0.455018	0.377555
340.63	0.73817	0.632947	0.560539	0.455187	0.378153
340.83	0.738267	0.633061	0.560624	0.455372	0.378309
341.03	0.738141	0.632434	0.560682	0.45498	0.378114
341.23	0.73833	0.632373	0.560888	0.455054	0.378222
341.43	0.73815	0.632383	0.560707	0.454982	0.378254
341.63	0.738317	0.632275	0.560483	0.454861	0.378391
341.83	0.738693	0.632287	0.560857	0.454936	0.378339
342.03	0.73894	0.632106	0.561147	0.454858	0.378509
342.23	0.739767	0.633206	0.561874	0.455494	0.379009
342.43	0.739745	0.633596	0.562036	0.455537	0.379137
342.63	0.740365	0.633706	0.562449	0.455598	0.379308
342.83	0.740718	0.633823	0.562449	0.455429	0.37938
343.03	0.740897	0.634111	0.562625	0.455396	0.379401
343.23	0.74136	0.634434	0.563259	0.456105	0.379278
343.43	0.741583	0.634564	0.563289	0.456462	0.379392
343.63	0.741571	0.634761	0.563605	0.45667	0.379631
343.83	0.741349	0.634464	0.563012	0.456473	0.37912
344.03	0.741899	0.635175	0.563182	0.456841	0.379237
344.23	0.741741	0.635226	0.563306	0.45668	0.379291
344.43	0.741442	0.635351	0.563037	0.456675	0.37943
344.63	0.741745	0.6359	0.563329	0.456779	0.379954
344.83	0.741563	0.63618	0.563217	0.457327	0.380157
345.03	0.741591	0.636088	0.563326	0.457149	0.38044
345.23	0.741935	0.636363	0.563589	0.457528	0.380607
345.43	0.742058	0.636634	0.563531	0.457519	0.381027
345.63	0.742368	0.636645	0.563698	0.457806	0.381246
345.83	0.742407	0.636335	0.563416	0.457547	0.380938
346.03	0.742784	0.636574	0.563459	0.458046	0.381418
346.23	0.743404	0.637413	0.564325	0.458883	0.381856
346.43	0.743693	0.637668	0.564647	0.459304	0.381956
346.63	0.744777	0.638222	0.565935	0.460091	0.38278
346.83	0.744992	0.638174	0.566065	0.460109	0.382939
347.03	0.745748	0.638945	0.566779	0.46107	0.383152
347.23	0.746697	0.6394	0.567552	0.461927	0.38348
347.43	0.746883	0.639616	0.567782	0.46225	0.383705
347.63	0.747354	0.639588	0.568797	0.462172	0.384228
347.83	0.747338	0.639961	0.569291	0.462256	0.384429
348.03	0.747156	0.639873	0.569587	0.462438	0.384445
348.23	0.747212	0.640342	0.569694	0.462562	0.384976
348.43	0.74747	0.641438	0.570905	0.463488	0.38572
348.63	0.747637	0.641878	0.571427	0.463727	0.386044
348.83	0.747525	0.642196	0.57169	0.464073	0.386312
349.03	0.746915	0.642116	0.571777	0.463889	0.386067
349.23	0.746931	0.642491	0.571597	0.463814	0.385926
349.43	0.746338	0.64211	0.571122	0.46336	0.385375
349.63	0.746443	0.642431	0.570942	0.463478	0.385188
349.83	0.746104	0.642372	0.570531	0.463472	0.384775
350.03	0.746027	0.642628	0.570592	0.46349	0.384729
350.23	0.746052	0.643156	0.570783	0.463518	0.384528
350.43	0.746261	0.643459	0.571116	0.463617	0.384395
350.63	0.746762	0.643719	0.571292	0.463476	0.384466
350.83	0.746885	0.644074	0.571048	0.463342	0.384106
351.03	0.747361	0.644128	0.570873	0.463781	0.383862
351.23	0.747739	0.64413	0.571088	0.464157	0.383842
351.43	0.748076	0.644413	0.571274	0.464245	0.383961
351.63	0.748294	0.644497	0.571826	0.464183	0.384355
351.83	0.748444	0.64512	0.572471	0.464638	0.385214
352.03	0.749083	0.645503	0.573402	0.465213	0.385953
352.23	0.749343	0.646757	0.57407	0.465846	0.387012
352.43	0.749407	0.647787	0.574877	0.466004	0.38797
352.63	0.749837	0.647834	0.575375	0.466151	0.388868
352.83	0.74995	0.647616	0.575416	0.466149	0.389269
353.03	0.749882	0.64754	0.575559	0.46637	0.389355
353.23	0.750695	0.647441	0.575848	0.466486	0.390099
353.43	0.751259	0.647436	0.576314	0.466442	0.390333
353.63	0.751884	0.648543	0.576566	0.467065	0.391154
353.83	0.751938	0.648366	0.576412	0.467152	0.39108
354.03	0.752516	0.64878	0.576717	0.466994	0.391342
354.23	0.752769	0.648701	0.576952	0.467144	0.391492
354.43	0.752744	0.64882	0.576891	0.467385	0.39155
354.63	0.75308	0.649243	0.577026	0.468009	0.391647
354.83	0.753437	0.649802	0.577245	0.468406	0.39174
355.03	0.753417	0.649431	0.576858	0.468469	0.391439
355.23	0.753828	0.649767	0.577062	0.468637	0.391666
355.43	0.754134	0.650341	0.57712	0.468684	0.391711
355.63	0.753266	0.650275	0.577173	0.468352	0.391683
355.83	0.753041	0.650726	0.577151	0.467836	0.391695
356.03	0.753302	0.651195	0.577679	0.468038	0.392222
356.23	0.752486	0.651173	0.577015	0.467583	0.391808
356.43	0.752162	0.65068	0.576484	0.467085	0.391473
356.63	0.752496	0.650307	0.576664	0.467501	0.391296
356.83	0.752146	0.649912	0.576202	0.467091	0.39092
357.03	0.752716	0.650151	0.576387	0.467245	0.390858
357.23	0.753566	0.650369	0.576722	0.467181	0.391299
357.43	0.754028	0.651084	0.57697	0.467199	0.391205
357.63	0.75437	0.651807	0.577415	0.468046	0.391716
357.83	0.754622	0.651763	0.577801	0.468305	0.391876
358.03	0.755016	0.652208	0.578426	0.468653	0.392247
358.23	0.75516	0.65244	0.578883	0.469223	0.392494
358.43	0.755655	0.653459	0.579443	0.470287	0.393025
358.63	0.756335	0.654023	0.580311	0.471042	0.393466
358.83	0.756817	0.654421	0.580542	0.471105	0.393759
359.03	0.757162	0.654607	0.580768	0.47129	0.39396
359.23	0.757678	0.654918	0.581156	0.471572	0.394287
359.43	0.757623	0.655202	0.581321	0.471744	0.394345
359.63	0.757117	0.655101	0.581118	0.471351	0.394219
359.83	0.757224	0.655289	0.58092	0.471307	0.394179
360.03	0.757224	0.655289	0.58092	0.471307	0.394179
360.23	0.758545	0.655971	0.581185	0.471963	0.393902
360.43	0.759813	0.656642	0.581021	0.472119	0.393669
360.63	0.760917	0.657145	0.580942	0.472594	0.393327
360.83	0.761977	0.657782	0.580771	0.472908	0.392886
361.03	0.763129	0.658187	0.580806	0.473024	0.392229
361.23	0.763759	0.658288	0.580511	0.47287	0.391551
361.43	0.764125	0.658232	0.58039	0.473035	0.391166
361.63	0.765102	0.65888	0.580719	0.473058	0.391797
361.83	0.765861	0.65909	0.580777	0.473312	0.391746
362.03	0.766804	0.659358	0.581032	0.473442	0.392166
362.23	0.766674	0.659036	0.580993	0.472809	0.392229
362.43	0.767125	0.659086	0.58103	0.472892	0.392408
362.63	0.76739	0.658768	0.58106	0.472482	0.392581
362.83	0.76751	0.658291	0.580801	0.472058	0.392405
363.03	0.767503	0.657796	0.580403	0.471776	0.391977
363.23	0.767126	0.657692	0.580306	0.471029	0.391928
363.43	0.767071	0.65787	0.580806	0.47166	0.392133
363.63	0.767375	0.657643	0.580903	0.471393	0.392008
363.83	0.76694	0.656524	0.580625	0.470846	0.391822
364.03	0.766999	0.656833	0.580442	0.471025	0.391883
364.23	0.766442	0.656422	0.580004	0.470466	0.391242
364.43	0.765939	0.656463	0.579688	0.469909	0.391173
364.63	0.765684	0.656185	0.579889	0.469743	0.390748
364.83	0.764805	0.656043	0.579129	0.468894	0.389932
365.03	0.764121	0.655574	0.579212	0.468474	0.389609
365.23	0.763118	0.655048	0.578828	0.467895	0.389301
365.43	0.76276	0.654889	0.578391	0.467988	0.389597
365.63	0.763079	0.655022	0.578301	0.46824	0.390148
365.83	0.763048	0.654981	0.577892	0.468561	0.389672
366.03	0.763233	0.654917	0.577753	0.468366	0.389777
366.23	0.762966	0.654825	0.57751	0.468137	0.389165
366.43	0.763611	0.654831	0.577496	0.468263	0.388911
366.63	0.763813	0.654266	0.577258	0.468203	0.388877
366.83	0.764097	0.654451	0.577508	0.468654	0.389394
367.03	0.763649	0.653898	0.577328	0.468208	0.388424
367.23	0.763305	0.65339	0.577797	0.46809	0.388371
367.43	0.763876	0.653283	0.577963	0.468925	0.388401
367.63	0.763552	0.652354	0.577241	0.468312	0.387863
367.83	0.763289	0.651958	0.576992	0.468537	0.387696
368.03	0.763075	0.652392	0.577	0.468648	0.387493
368.23	0.762115	0.65152	0.576483	0.467892	0.387111
368.43	0.761646	0.651739	0.576624	0.467346	0.387088
368.63	0.761271	0.651573	0.576615	0.466869	0.386644
368.83	0.760298	0.651095	0.575842	0.466423	0.386008
369.03	0.760266	0.650902	0.576404	0.466415	0.385802
369.23	0.760597	0.650502	0.576034	0.46663	0.38552
369.43	0.760905	0.650443	0.575694	0.466947	0.385768
369.63	0.760861	0.6509	0.575877	0.46699	0.38564
369.83	0.761013	0.651635	0.575842	0.467212	0.38568
370.03	0.761177	0.651895	0.575556	0.467112	0.385829
370.23	0.761654	0.653151	0.57582	0.467549	0.386086
370.43	0.761735	0.653264	0.575511	0.467389	0.386169
370.63	0.761594	0.652934	0.57507	0.467571	0.386377
370.83	0.76176	0.653408	0.575143	0.467603	0.386569
371.03	0.761264	0.652965	0.574347	0.466871	0.386073
371.23	0.761061	0.652448	0.573811	0.466653	0.386336
371.43	0.761183	0.65259	0.573738	0.467144	0.386472
371.63	0.760681	0.652058	0.573188	0.466533	0.386489
371.83	0.760284	0.652082	0.573198	0.466625	0.386774
372.03	0.759588	0.651682	0.572891	0.466122	0.386599
372.23	0.758776	0.650955	0.572431	0.465313	0.386515
372.43	0.758693	0.651149	0.572525	0.464826	0.386117
372.63	0.759012	0.650556	0.572563	0.464361	0.385741
372.83	0.758947	0.649569	0.572312	0.464092	0.385338
373.03	0.759391	0.649219	0.572666	0.464023	0.38524
373.23	0.760203	0.649033	0.572433	0.464371	0.385369
373.43	0.759956	0.648948	0.572581	0.464194	0.385598
373.63	0.75986	0.64937	0.572543	0.464666	0.385729
373.83	0.759949	0.64912	0.572078	0.464682	0.385817
374.03	0.760065	0.649382	0.571697	0.4648	0.385675
374.23	0.760325	0.649966	0.571859	0.465273	0.385738
374.43	0.760235	0.649687	0.571815	0.465383	0.385998
374.63	0.759835	0.649126	0.571551	0.465312	0.385782
374.83	0.759816	0.649315	0.5718	0.465275	0.38584
375.03	0.759167	0.64904	0.571562	0.465241	0.385925
375.23	0.758947	0.649059	0.571898	0.465615	0.38594
375.43	0.758479	0.648981	0.57244	0.466167	0.385608
375.63	0.757993	0.648864	0.572268	0.46615	0.385543
375.83	0.757244	0.649015	0.572373	0.466122	0.385664
376.03	0.756165	0.648311	0.572186	0.465497	0.385262
376.23	0.755949	0.648361	0.572392	0.465259	0.385193
376.43	0.755948	0.648217	0.572277	0.464584	0.384677
376.63	0.755615	0.647749	0.572012	0.463957	0.384331
376.83	0.755115	0.647241	0.571742	0.463703	0.384043
377.03	0.755898	0.647247	0.571826	0.463592	0.38435
377.23	0.756389	0.647112	0.571688	0.46377	0.384684
377.43	0.755726	0.646507	0.571484	0.463712	0.385047
377.63	0.755703	0.646213	0.570944	0.463436	0.38487
377.83	0.755475	0.645596	0.570185	0.462548	0.384556
378.03	0.755155	0.64574	0.570047	0.462837	0.384453
378.23	0.75482	0.645138	0.57034	0.462572	0.3844
378.43	0.754234	0.644362	0.570444	0.461926	0.384273
378.63	0.753466	0.643901	0.570119	0.461425	0.383562
378.83	0.753164	0.643729	0.570113	0.461237	0.38355
379.03	0.753202	0.644117	0.570311	0.461598	0.383787
379.23	0.753514	0.644619	0.570716	0.461913	0.383504
379.43	0.753163	0.644425	0.570501	0.461833	0.383192
379.63	0.753278	0.645291	0.570613	0.461999	0.38379
379.83	0.752716	0.645543	0.570468	0.462228	0.383703
380.03	0.75312	0.646023	0.570663	0.462922	0.384034
380.23	0.75316	0.646906	0.570519	0.462777	0.384033
380.43	0.753379	0.647039	0.570289	0.462655	0.383873
380.63	0.753505	0.647621	0.570553	0.46314	0.384489
380.83	0.753959	0.647789	0.570299	0.463016	0.384516
381.03	0.754408	0.648344	0.570145	0.463086	0.384944
381.23	0.75377	0.648315	0.569863	0.463262	0.384841
381.43	0.753584	0.64817	0.569763	0.463124	0.384697
381.63	0.754009	0.648021	0.56979	0.463151	0.38461
381.83	0.753874	0.647661	0.569534	0.463247	0.384602
382.03	0.753682	0.64748	0.57	0.463017	0.384193
382.23	0.753564	0.646809	0.570074	0.462581	0.383852
382.43	0.753462	0.646587	0.569956	0.462248	0.383965
382.63	0.753781	0.647061	0.570559	0.462436	0.384103
382.83	0.753425	0.646514	0.570393	0.462011	0.383693
383.03	0.753543	0.646245	0.570726	0.462107	0.383496
383.23	0.753739	0.646049	0.570549	0.462122	0.383116
383.43	0.753368	0.645533	0.570035	0.461749	0.383206
383.63	0.753592	0.645277	0.569683	0.461761	0.382952
383.83	0.753477	0.644727	0.568885	0.461714	0.382918
384.03	0.75384	0.644229	0.56862	0.461062	0.38327
384.23	0.752316	0.643248	0.567691	0.459906	0.382218
384.43	0.752604	0.64291	0.567455	0.459863	0.382176
384.63	0.752494	0.643197	0.567132	0.459875	0.382237
384.83	0.751765	0.642625	0.565936	0.458958	0.380878
385.03	0.75129	0.642504	0.565561	0.458862	0.380703
385.23	0.750701	0.642173	0.56521	0.458806	0.380313
385.43	0.751032	0.642195	0.565181	0.458905	0.380474
385.63	0.751302	0.642355	0.565527	0.459286	0.380915
385.83	0.750822	0.642419	0.565691	0.459164	0.38082
386.03	0.750931	0.642695	0.566174	0.459148	0.380924
386.23	0.751325	0.643217	0.566483	0.459726	0.381308
386.43	0.751336	0.643718	0.566896	0.459838	0.381857
386.63	0.751686	0.643984	0.567493	0.460669	0.382021
386.83	0.75087	0.6435	0.567258	0.460795	0.381746
387.03	0.750781	0.642955	0.567482	0.46134	0.381917
387.23	0.750897	0.642953	0.567169	0.461754	0.382165
387.43	0.750903	0.643124	0.567244	0.462221	0.382364
387.63	0.751271	0.64301	0.567404	0.462257	0.382797
387.83	0.751033	0.642975	0.566865	0.461994	0.382802
388.03	0.75104	0.642789	0.566582	0.461803	0.382724
388.23	0.750695	0.642282	0.566339	0.461242	0.382303
388.43	0.751588	0.642685	0.566514	0.461345	0.382572
388.63	0.751273	0.642253	0.56599	0.461109	0.382335
388.83	0.750439	0.641106	0.565538	0.460324	0.381612
389.03	0.750584	0.641192	0.56592	0.460714	0.382214
389.23	0.750376	0.641118	0.565653	0.46028	0.382009
389.43	0.750015	0.641181	0.565634	0.459957	0.382133
389.63	0.749899	0.64103	0.56561	0.45949	0.382063
389.83	0.749555	0.640647	0.565862	0.459386	0.381714
390.03	0.749874	0.64047	0.565861	0.45953	0.381554
390.23	0.750372	0.640786	0.565624	0.45949	0.381512
390.43	0.750083	0.640785	0.5654	0.459555	0.381363
390.63	0.750156	0.640747	0.56533	0.460134	0.381143
390.83	0.749614	0.640313	0.565259	0.459598	0.380641
391.03	0.749604	0.640041	0.565118	0.459888	0.380808
391.23	0.749557	0.640384	0.564772	0.459829	0.380568
391.43	0.749799	0.640703	0.565024	0.459749	0.380278
391.63	0.749909	0.640449	0.564652	0.458994	0.379903
391.83	0.74992	0.640329	0.564054	0.458713	0.379924
392.03	0.750502	0.640306	0.564318	0.458387	0.380256
392.23	0.750893	0.639956	0.564962	0.457969	0.380466
392.43	0.750765	0.639915	0.564964	0.457855	0.380567
392.63	0.75017	0.639203	0.565289	0.458094	0.380504
392.83	0.750209	0.639092	0.565704	0.458142	0.380491
393.03	0.750619	0.639354	0.565574	0.458379	0.380815
393.23	0.750563	0.639711	0.565379	0.458334	0.380892
393.43	0.750402	0.640138	0.565502	0.45841	0.380637
393.63	0.750581	0.640038	0.56512	0.458521	0.380728
393.83	0.750448	0.639961	0.565506	0.458978	0.381172
394.03	0.750044	0.639984	0.565147	0.459021	0.380896
394.23	0.749862	0.640018	0.564616	0.458614	0.380944
394.43	0.749275	0.639869	0.564631	0.45859	0.380998
394.63	0.749138	0.64033	0.564709	0.458628	0.381217
394.83	0.748847	0.639751	0.564531	0.458068	0.38102
395.03	0.74875	0.639679	0.563983	0.458371	0.381011
395.23	0.748621	0.639526	0.563344	0.458042	0.380674
395.43	0.748127	0.638838	0.563004	0.457621	0.380218
395.63	0.747893	0.639118	0.563015	0.457899	0.380469
395.83	0.74807	0.639192	0.563322	0.458277	0.381003
396.03	0.747856	0.639243	0.56364	0.458075	0.38046
396.23	0.747872	0.639437	0.564037	0.458695	0.380453
396.43	0.747088	0.639257	0.56347	0.458594	0.379939
396.63	0.747053	0.639127	0.563695	0.458982	0.379022
396.83	0.747218	0.638948	0.563116	0.458339	0.378413
397.03	0.747314	0.63898	0.563035	0.458601	0.378403
397.23	0.747444	0.639166	0.563101	0.458836	0.378484
397.43	0.74749	0.638991	0.563293	0.458588	0.378252
397.63	0.746723	0.638663	0.562673	0.458383	0.378598
397.83	0.746626	0.638298	0.5624	0.457726	0.378773
398.03	0.746491	0.638071	0.562028	0.457197	0.378412
398.23	0.747105	0.638217	0.562248	0.456533	0.379035
398.43	0.747524	0.63825	0.56242	0.456618	0.379636
398.63	0.748041	0.638241	0.562261	0.456722	0.380006
398.83	0.748526	0.637792	0.561986	0.456661	0.380487
399.03	0.748963	0.637683	0.561668	0.456735	0.380775
399.23	0.749026	0.637789	0.561455	0.456437	0.380924
399.43	0.748435	0.637627	0.561467	0.456184	0.380477
399.63	0.748255	0.638143	0.5616	0.456603	0.380364
[truncated: 1,601 more rows]

## Sheet: B (right, kinetics)
Include	Index	Color	Sensor Location	Sensor Type	Sensor Info	Replicate Group	Baseline Loc.	Assoc. (Sample) Loc.	Sample ID	Dissoc. Loc.	Loading Well Location	Loading Sample ID	Cycle	Conc. (uM)	Response	KD (M)	KD Error	kon(1/Ms)	kon Error	kdis(1/s)	kdis Error	RMax	RMax Error	kobs(1/s)	Req	Req/Rmax(%)	Full X^2	Full R^2
x	0	-16776961	A3	SA (Streptavidin)		N/A	A5	A6	FL27	A5	A4	pTau-bio	1	20	0.7494	1.58e-06	2.36e-08	228	1.97	0.000359	4.39e-06	0.9893	0.0046	0.00491	0.9169	92.7	0.6883	0.9946
x	1	-16776961	B3	SA (Streptavidin)		N/A	B5	B6	FL27	B5	B4	pTau-bio	1	10	0.6462	1.58e-06	2.36e-08	228	1.97	0.000359	4.39e-06	1.2436	0.0083	0.00264	1.0741	86.4	0.6883	0.9946
x	2	-16776961	C3	SA (Streptavidin)		N/A	C5	C6	FL27	C5	C4	pTau-bio	1	5	0.5739	1.58e-06	2.36e-08	228	1.97	0.000359	4.39e-06	1.8355	0.0146	0.0015	1.3952	76	0.6883	0.9946
x	3	-16776961	D3	SA (Streptavidin)		N/A	D5	D6	FL27	D5	D4	pTau-bio	1	2.5	0.4655	1.58e-06	2.36e-08	228	1.97	0.000359	4.39e-06	2.7152	0.0237	0.000929	1.6645	61.3	0.6883	0.9946
x	4	-16776961	E3	SA (Streptavidin)		N/A	E5	E6	FL27	E5	E4	pTau-bio	1	1.25	0.3875	1.58e-06	2.36e-08	228	1.97	0.000359	4.39e-06	4.3022	0.0393	0.000644	1.9015	44.2	0.6883	0.9946

## Sheet: C (left)
time	20 uM	10 uM	5 uM	2.5 uM	1.25uM
0	0.01178	0.002054	0.008493	-0.00176	0.004299
0.2	0.012575	0.001909	0.007905	-0.00215	0.00388
0.4	0.013789	0.001816	0.007148	-0.00271	0.003363
0.6	0.015009	0.002064	0.006495	-0.00325	0.002922
0.8	0.016474	0.002334	0.005514	-0.004	0.002254
1	0.017986	0.00227	0.004364	-0.00496	0.001311
1.2	0.020093	0.002941	0.003628	-0.00499	0.000944
1.4	0.021603	0.003038	0.00264	-0.0055	0.000234
1.6	0.02352	0.003712	0.002375	-0.00564	-9.3e-05
1.8	0.025338	0.004677	0.002379	-0.00565	9.21e-05
2	0.026963	0.005039	0.00209	-0.00582	-3.3e-05
2.2	0.029073	0.006131	0.00258	-0.00541	0.000218
2.4	0.030407	0.007068	0.003098	-0.00485	0.000123
2.6	0.032333	0.00814	0.003833	-0.0039	0.000266
2.8	0.033332	0.009456	0.004826	-0.00333	0.000689
3	0.034206	0.010636	0.005278	-0.00297	0.000625
3.2	0.035046	0.011023	0.005557	-0.00234	0.000505
3.4	0.036879	0.012652	0.006556	-0.00138	0.000931
3.6	0.037723	0.013375	0.007466	-0.00104	0.001269
3.8	0.038522	0.014036	0.007972	-0.00052	0.001811
4	0.039991	0.014745	0.009149	0.000358	0.002434
4.2	0.041395	0.015732	0.009935	0.000813	0.003094
4.4	0.042743	0.016697	0.010491	0.001138	0.003251
4.6	0.043563	0.017718	0.010641	0.001005	0.003616
4.8	0.044452	0.017898	0.010405	0.000574	0.003693
5	0.045418	0.017733	0.010421	0.0003	0.003648
5.2	0.046542	0.018357	0.010748	0.000312	0.003979
5.4	0.046621	0.018102	0.010607	-0.00015	0.004223
5.6	0.047302	0.018558	0.010594	-0.00045	0.004501
5.8	0.047665	0.018474	0.010612	-0.00086	0.00441
6	0.047537	0.017464	0.010108	-0.00174	0.00363
6.2	0.04768	0.017331	0.009819	-0.00217	0.002832
6.4	0.047613	0.01695	0.009473	-0.00262	0.002176
6.6	0.047897	0.017101	0.009446	-0.00273	0.001813
6.8	0.047315	0.016807	0.009317	-0.00345	0.000835
7	0.047276	0.016883	0.009124	-0.0034	0.0003
7.2	0.046996	0.016471	0.008574	-0.00394	-0.00063
7.4	0.047133	0.017353	0.008692	-0.00403	-0.00092
7.6	0.046482	0.017071	0.008692	-0.00444	-0.00128
7.8	0.046744	0.017289	0.008648	-0.00452	-0.00162
8	0.046898	0.017672	0.00891	-0.00453	-0.002
8.2	0.047144	0.017916	0.008786	-0.00447	-0.00225
8.4	0.04716	0.018035	0.008624	-0.00448	-0.00256
8.6	0.047038	0.017655	0.008183	-0.00525	-0.0026
8.8	0.047624	0.017397	0.008282	-0.00532	-0.00288
9	0.048177	0.017357	0.008489	-0.0054	-0.00332
9.2	0.049112	0.018333	0.008936	-0.00543	-0.00304
9.4	0.049279	0.018413	0.008508	-0.0058	-0.00273
9.6	0.049504	0.018426	0.008034	-0.00619	-0.0031
9.8	0.049567	0.018448	0.008132	-0.00636	-0.00315
10	0.049592	0.018316	0.007936	-0.00655	-0.00309
10.2	0.049888	0.018706	0.007605	-0.00678	-0.00313
10.4	0.04968	0.018276	0.00754	-0.00698	-0.00302
10.6	0.050029	0.01851	0.007918	-0.00696	-0.00289
10.8	0.049905	0.018484	0.007895	-0.00714	-0.00287
11	0.050008	0.018313	0.008036	-0.00712	-0.00266
11.2	0.049927	0.018032	0.007761	-0.00742	-0.00298
11.4	0.049958	0.018623	0.008109	-0.00675	-0.00249
11.6	0.04964	0.018268	0.008125	-0.00667	-0.00221
11.8	0.049933	0.018096	0.008055	-0.0064	-0.00216
12	0.04978	0.017522	0.007633	-0.00613	-0.00242
12.2	0.049676	0.01715	0.007765	-0.00625	-0.00259
12.4	0.049773	0.016921	0.007556	-0.00642	-0.00287
12.6	0.049883	0.016411	0.007655	-0.00669	-0.00326
12.8	0.050751	0.016932	0.008013	-0.00597	-0.00323
13	0.051274	0.017813	0.008331	-0.00595	-0.0031
13.2	0.0517	0.018255	0.008539	-0.00603	-0.00279
13.4	0.051315	0.017944	0.007766	-0.00686	-0.00326
13.6	0.051437	0.018463	0.008011	-0.00665	-0.00333
13.8	0.051303	0.019248	0.007688	-0.00716	-0.00371
14	0.051345	0.019678	0.007556	-0.00734	-0.00416
14.2	0.051201	0.019604	0.007214	-0.00791	-0.00479
14.4	0.050682	0.018737	0.006575	-0.00839	-0.0055
14.6	0.051093	0.019224	0.00678	-0.00797	-0.0053
14.8	0.050995	0.018986	0.00693	-0.0084	-0.00492
15	0.051098	0.018794	0.006843	-0.00871	-0.00509
15.2	0.050956	0.018882	0.006822	-0.00852	-0.00517
15.4	0.050338	0.019229	0.006965	-0.00856	-0.00499
15.6	0.050252	0.018572	0.006602	-0.00889	-0.00469
15.8	0.049784	0.017746	0.006256	-0.0094	-0.00525
16	0.049493	0.017705	0.006212	-0.00986	-0.00562
16.2	0.049479	0.01771	0.006627	-0.00993	-0.00519
16.4	0.050087	0.017627	0.006728	-0.00944	-0.00481
16.6	0.050483	0.017651	0.007086	-0.00906	-0.00455
16.8	0.050733	0.017845	0.007054	-0.00857	-0.00412
17	0.050812	0.018224	0.007387	-0.00816	-0.00389
17.2	0.050662	0.018166	0.007497	-0.00815	-0.00401
17.4	0.050967	0.018807	0.007258	-0.00792	-0.00423
17.6	0.051097	0.01962	0.007282	-0.00744	-0.00436
17.8	0.051378	0.020141	0.006985	-0.00734	-0.00454
18	0.05176	0.020223	0.007144	-0.00695	-0.00473
18.2	0.051566	0.019957	0.00668	-0.00709	-0.00518
18.4	0.051843	0.020231	0.006257	-0.0072	-0.00526
18.6	0.052237	0.02033	0.00653	-0.00706	-0.00501
18.8	0.052214	0.020456	0.006864	-0.00744	-0.00499
19	0.051876	0.020741	0.006359	-0.00774	-0.006
19.2	0.051852	0.020764	0.00642	-0.00782	-0.00608
19.4	0.051711	0.020722	0.006513	-0.00819	-0.00641
19.6	0.051954	0.019846	0.006471	-0.00878	-0.00679
19.8	0.051383	0.019241	0.006358	-0.00941	-0.00747
20	0.051998	0.01964	0.006663	-0.00946	-0.00715
20.2	0.052328	0.019405	0.007081	-0.00934	-0.00677
20.4	0.052856	0.019177	0.007326	-0.00933	-0.00656
20.6	0.053205	0.019358	0.006894	-0.00991	-0.00682
20.8	0.052794	0.019074	0.00665	-0.00998	-0.00656
21	0.053119	0.019645	0.007291	-0.00978	-0.00608
21.2	0.053194	0.019787	0.007513	-0.00995	-0.00592
21.4	0.053492	0.01959	0.007264	-0.00988	-0.00603
21.6	0.053274	0.019143	0.007335	-0.01022	-0.00596
21.8	0.053811	0.019057	0.008128	-0.00975	-0.00565
22	0.053555	0.018875	0.00809	-0.00978	-0.00571
22.2	0.053241	0.018676	0.008261	-0.00977	-0.00593
22.4	0.053828	0.019061	0.008518	-0.00948	-0.00576
22.6	0.053674	0.01877	0.008598	-0.00926	-0.00623
22.8	0.053205	0.019449	0.008525	-0.00883	-0.00636
23	0.053055	0.019678	0.008174	-0.00873	-0.00692
23.2	0.052862	0.019645	0.008365	-0.0087	-0.00708
23.4	0.052453	0.019634	0.007992	-0.0089	-0.00769
23.6	0.052491	0.019581	0.007948	-0.0088	-0.00767
23.8	0.0521	0.019946	0.007912	-0.00864	-0.00738
24	0.052123	0.020156	0.007723	-0.00907	-0.00733
24.2	0.051609	0.01971	0.007054	-0.00946	-0.00748
24.4	0.05131	0.019838	0.006433	-0.00976	-0.00744
24.6	0.051422	0.020089	0.006063	-0.01003	-0.00715
24.8	0.05132	0.019688	0.00613	-0.01001	-0.00677
25	0.0517	0.020271	0.006779	-0.00999	-0.00612
25.2	0.051309	0.01971	0.00653	-0.01059	-0.00612
25.4	0.051604	0.019668	0.006557	-0.01099	-0.00615
25.6	0.051983	0.01959	0.007075	-0.01081	-0.00584
25.8	0.052457	0.019927	0.007533	-0.01055	-0.00568
26	0.052819	0.020075	0.007259	-0.0106	-0.00599
26.2	0.052796	0.019879	0.007498	-0.01069	-0.00629
26.4	0.052842	0.019753	0.007057	-0.01075	-0.00677
26.6	0.053054	0.02005	0.007342	-0.01018	-0.00713
26.8	0.052823	0.019907	0.007452	-0.00999	-0.00695
27	0.052308	0.019591	0.007613	-0.01008	-0.00774
27.2	0.051821	0.019459	0.007563	-0.00992	-0.00823
27.4	0.051587	0.019356	0.007298	-0.00984	-0.00848
27.6	0.051656	0.019305	0.007751	-0.00938	-0.00844
27.8	0.051048	0.018706	0.007414	-0.0096	-0.00886
28	0.050753	0.017715	0.007009	-0.01017	-0.0096
28.2	0.049783	0.016658	0.006176	-0.01036	-0.00993
28.4	0.049636	0.016793	0.0064	-0.01	-0.00979
28.6	0.049914	0.016685	0.007027	-0.00995	-0.00969
28.8	0.049794	0.016346	0.006965	-0.01028	-0.0101
29	0.049388	0.016486	0.007071	-0.01039	-0.01002
29.2	0.049008	0.016114	0.006849	-0.01061	-0.0101
29.4	0.049704	0.016369	0.007101	-0.01026	-0.01033
29.6	0.049793	0.016441	0.006882	-0.01023	-0.01015
29.8	0.04954	0.016687	0.006735	-0.01004	-0.01007
30	0.049934	0.017087	0.006501	-0.00945	-0.00986
30.2	0.049881	0.016802	0.006424	-0.0098	-0.00971
30.4	0.050434	0.017072	0.006527	-0.00965	-0.00951
30.6	0.05053	0.016841	0.006395	-0.00991	-0.00945
30.8	0.050687	0.016606	0.006235	-0.01035	-0.0093
31	0.050417	0.016686	0.005991	-0.01085	-0.00975
31.2	0.050999	0.016763	0.005868	-0.01085	-0.01
31.4	0.051112	0.016284	0.005899	-0.0114	-0.01021
31.6	0.051699	0.016465	0.006008	-0.01167	-0.01016
31.8	0.051683	0.016145	0.005729	-0.01246	-0.01034
32	0.051605	0.015986	0.005762	-0.01264	-0.01035
32.2	0.051458	0.015738	0.005315	-0.01279	-0.01041
32.4	0.052323	0.016359	0.006187	-0.01255	-0.0105
32.6	0.05262	0.016743	0.00644	-0.01239	-0.01071
32.8	0.052639	0.016802	0.006307	-0.01221	-0.01083
33	0.052579	0.017021	0.006602	-0.01163	-0.01064
33.2	0.052216	0.017247	0.006909	-0.01109	-0.01071
33.4	0.051337	0.017156	0.006813	-0.01079	-0.01093
33.6	0.050471	0.017089	0.006705	-0.01058	-0.0104
33.8	0.049816	0.017144	0.00661	-0.00978	-0.01023
34	0.050413	0.017756	0.0072	-0.00874	-0.00935
34.2	0.050042	0.01756	0.006958	-0.00882	-0.00944
34.4	0.049319	0.017622	0.006839	-0.00879	-0.00925
34.6	0.049025	0.017814	0.006834	-0.00871	-0.00909
34.8	0.048868	0.017937	0.007396	-0.00853	-0.00851
35	0.048555	0.018332	0.007738	-0.00826	-0.00808
35.2	0.048111	0.018078	0.007671	-0.00833	-0.00844
35.4	0.047657	0.017807	0.007559	-0.00902	-0.00858
35.6	0.048233	0.018565	0.00759	-0.00901	-0.00853
35.8	0.048223	0.018811	0.007495	-0.00905	-0.00844
36	0.048492	0.018693	0.007498	-0.00833	-0.00845
36.2	0.049134	0.018337	0.007417	-0.00838	-0.00891
36.4	0.049778	0.018629	0.00739	-0.00896	-0.00902
36.6	0.049928	0.018634	0.006795	-0.00881	-0.00921
36.8	0.05	0.018252	0.006659	-0.00923	-0.00954
37	0.050167	0.018098	0.006239	-0.00955	-0.00983
37.2	0.049816	0.017617	0.005692	-0.01007	-0.01036
37.4	0.050086	0.017632	0.005324	-0.01008	-0.01003
37.6	0.050586	0.017774	0.004884	-0.0104	-0.01002
37.8	0.050916	0.018137	0.004846	-0.01018	-0.0099
38	0.05146	0.018381	0.005339	-0.01023	-0.00917
38.2	0.051079	0.018253	0.004638	-0.01032	-0.00893
38.4	0.050302	0.018039	0.004763	-0.01053	-0.00899
38.6	0.04997	0.018349	0.005045	-0.01047	-0.00854
38.8	0.049	0.017758	0.004816	-0.01116	-0.00856
39	0.048394	0.017777	0.004486	-0.01139	-0.00901
39.2	0.047416	0.016875	0.003696	-0.01226	-0.01007
39.4	0.047381	0.016995	0.003689	-0.01261	-0.01007
39.6	0.047306	0.017061	0.00366	-0.01224	-0.00974
39.8	0.046774	0.017025	0.003904	-0.01188	-0.00961
40	0.046295	0.016136	0.004023	-0.01177	-0.00978
40.2	0.045691	0.015627	0.004023	-0.01213	-0.01024
40.4	0.045438	0.015701	0.004009	-0.01227	-0.01009
40.6	0.045256	0.015871	0.004402	-0.01158	-0.01029
40.8	0.045585	0.01582	0.004682	-0.01186	-0.0103
41	0.045945	0.015975	0.004887	-0.01158	-0.01029
41.2	0.046095	0.016058	0.005328	-0.01154	-0.01024
41.4	0.047002	0.016679	0.005616	-0.01063	-0.00995
41.6	0.047231	0.016632	0.005681	-0.01075	-0.01008
41.8	0.047704	0.016375	0.006195	-0.01041	-0.01
42	0.047938	0.016412	0.006471	-0.01058	-0.00982
42.2	0.048049	0.016895	0.006814	-0.0098	-0.00975
42.4	0.048074	0.016844	0.00709	-0.00987	-0.01024
42.6	0.048015	0.016837	0.007154	-0.01045	-0.01069
42.8	0.04783	0.016326	0.00675	-0.01093	-0.0113
43	0.047958	0.015818	0.006465	-0.01124	-0.01154
43.2	0.048321	0.015564	0.006287	-0.01122	-0.0114
43.4	0.047971	0.015178	0.006116	-0.01152	-0.01111
43.6	0.047537	0.01485	0.006082	-0.01155	-0.0111
43.8	0.047695	0.014758	0.006333	-0.01104	-0.01096
44	0.047445	0.014781	0.006199	-0.01099	-0.01095
44.2	0.046868	0.014666	0.005925	-0.0107	-0.01108
44.4	0.046921	0.014521	0.005865	-0.0106	-0.01081
44.6	0.047149	0.014744	0.006001	-0.01024	-0.01065
44.8	0.046493	0.01427	0.005779	-0.0108	-0.01064
45	0.046089	0.014372	0.005521	-0.01049	-0.01054
45.2	0.046503	0.015299	0.00587	-0.00986	-0.01003
45.4	0.046958	0.0161	0.006004	-0.00885	-0.00967
45.6	0.046493	0.016554	0.006175	-0.00898	-0.00905
45.8	0.046389	0.017209	0.006047	-0.00904	-0.00905
46	0.046587	0.017874	0.006116	-0.00879	-0.00856
46.2	0.046157	0.018303	0.006086	-0.00866	-0.00869
46.4	0.046097	0.018509	0.005931	-0.00878	-0.00895
46.6	0.045798	0.018813	0.006086	-0.00906	-0.0092
46.8	0.045633	0.018703	0.005551	-0.00955	-0.00945
47	0.045997	0.018495	0.005466	-0.00983	-0.00914
47.2	0.045946	0.018364	0.005141	-0.01031	-0.0095
47.4	0.045558	0.017768	0.004846	-0.01103	-0.00968
47.6	0.046013	0.017729	0.004758	-0.01106	-0.00994
47.8	0.046016	0.017316	0.004492	-0.0111	-0.00997
48	0.045594	0.017248	0.004001	-0.01169	-0.0102
48.2	0.045307	0.01618	0.003545	-0.01206	-0.0106
48.4	0.045303	0.01539	0.003424	-0.01286	-0.01075
48.6	0.045128	0.015341	0.003364	-0.01336	-0.01102
48.8	0.044208	0.014986	0.003298	-0.0139	-0.01156
49	0.044708	0.015219	0.003457	-0.01408	-0.01176
49.2	0.045396	0.015797	0.004526	-0.01332	-0.01136
49.4	0.045289	0.015575	0.004793	-0.01359	-0.01141
49.6	0.04478	0.014859	0.00455	-0.0142	-0.01141
49.8	0.044841	0.01461	0.004283	-0.01467	-0.01218
50	0.044949	0.014654	0.004511	-0.01429	-0.01222
50.2	0.044247	0.014716	0.004402	-0.01449	-0.01293
50.4	0.044438	0.015022	0.004584	-0.01412	-0.01226
50.6	0.044461	0.015274	0.004899	-0.01406	-0.01197
50.8	0.044121	0.014441	0.004293	-0.01433	-0.01195
51	0.044268	0.014412	0.00414	-0.01376	-0.01134
51.2	0.044022	0.014954	0.004135	-0.01332	-0.01142
51.4	0.043579	0.015006	0.0039	-0.01277	-0.01111
51.6	0.043528	0.015602	0.003852	-0.01191	-0.0107
51.8	0.042309	0.015399	0.00354	-0.01217	-0.01049
52	0.0427	0.015941	0.003633	-0.01133	-0.0101
52.2	0.042954	0.015576	0.003535	-0.01127	-0.01047
52.4	0.042675	0.015329	0.003659	-0.01169	-0.0109
52.6	0.042211	0.015061	0.00362	-0.0117	-0.01142
52.8	0.041801	0.014764	0.003735	-0.0119	-0.01191
53	0.042266	0.014502	0.004297	-0.01194	-0.012
53.2	0.042825	0.014541	0.005098	-0.01144	-0.01167
53.4	0.042999	0.014084	0.005434	-0.01217	-0.01217
53.6	0.04257	0.013487	0.005144	-0.01276	-0.01268
53.8	0.042389	0.013236	0.004937	-0.01331	-0.01345
54	0.042347	0.013155	0.005065	-0.01285	-0.01342
54.2	0.042177	0.012615	0.004827	-0.01284	-0.01331
54.4	0.042334	0.012398	0.004893	-0.013	-0.01271
54.6	0.042093	0.012374	0.004893	-0.01305	-0.01297
54.8	0.041874	0.012073	0.004376	-0.01293	-0.01289
55	0.041845	0.012682	0.004384	-0.01265	-0.01269
55.2	0.041066	0.012867	0.003839	-0.01268	-0.01309
55.4	0.04073	0.012785	0.003688	-0.01288	-0.01288
55.6	0.040757	0.012866	0.003481	-0.01264	-0.01262
55.8	0.040261	0.01266	0.002978	-0.01304	-0.01295
56	0.041279	0.013221	0.003376	-0.01223	-0.01289
56.2	0.041007	0.012338	0.002992	-0.01295	-0.01334
56.4	0.040722	0.012006	0.002824	-0.0136	-0.01373
56.6	0.040337	0.011876	0.002855	-0.01369	-0.01338
56.8	0.040208	0.011468	0.002071	-0.01433	-0.01365
57	0.041258	0.011824	0.00321	-0.01394	-0.01298
57.2	0.041754	0.011962	0.003109	-0.01438	-0.01308
57.4	0.04193	0.011958	0.003047	-0.01484	-0.0133
57.6	0.041593	0.01173	0.002719	-0.01512	-0.01341
57.8	0.041706	0.011692	0.002334	-0.01479	-0.01327
58	0.042053	0.011857	0.002631	-0.01408	-0.01303
58.2	0.042699	0.012378	0.00291	-0.01361	-0.01253
58.4	0.04256	0.012419	0.002524	-0.01369	-0.01293
58.6	0.042523	0.012276	0.002524	-0.01338	-0.01313
58.8	0.042232	0.012035	0.00239	-0.01392	-0.01321
59	0.042014	0.012337	0.002748	-0.01383	-0.01299
59.2	0.041514	0.011954	0.002639	-0.0136	-0.01317
59.4	0.041341	0.01197	0.003035	-0.01358	-0.01298
59.6	0.041351	0.011786	0.002633	-0.01326	-0.01299
59.8	0.041113	0.011657	0.002774	-0.01362	-0.01315
60	0.040946	0.011702	0.002749	-0.01383	-0.0131
60.2	0.040523	0.010814	0.002225	-0.01385	-0.013
60.4	0.040077	0.010309	0.001373	-0.01446	-0.01315
60.6	0.039676	0.010137	0.001064	-0.01472	-0.01292
60.8	0.039615	0.009545	0.000447	-0.01509	-0.01313
61	0.039984	0.010036	0.001415	-0.01506	-0.01288
61.2	0.039652	0.010012	0.000604	-0.01543	-0.0132
61.4	0.039318	0.010014	0.000515	-0.01568	-0.01349
61.6	0.038985	0.010244	0.000465	-0.01533	-0.01339
61.8	0.038801	0.010337	0.000248	-0.015	-0.01319
62	0.038523	0.010358	0.000375	-0.015	-0.01346
62.2	0.0389	0.011053	0.000712	-0.0143	-0.0132
62.4	0.038226	0.011131	0.000565	-0.01477	-0.01351
62.6	0.038321	0.011256	0.001389	-0.01466	-0.0132
62.8	0.038178	0.012183	0.002141	-0.01464	-0.0128
63	0.038077	0.012847	0.002541	-0.0141	-0.01263
63.2	0.037857	0.012473	0.00242	-0.01385	-0.01277
63.4	0.03795	0.012681	0.0025	-0.01436	-0.01287
63.6	0.037806	0.012449	0.002517	-0.01465	-0.01316
63.8	0.037522	0.012229	0.002783	-0.0152	-0.01334
64	0.037717	0.012337	0.002257	-0.01528	-0.01338
64.2	0.037822	0.011666	0.001752	-0.01536	-0.01354
64.4	0.037588	0.011131	0.001159	-0.01629	-0.01402
64.6	0.037572	0.010919	0.000924	-0.01674	-0.01431
64.8	0.037436	0.010268	0.000971	-0.01692	-0.01424
65	0.037777	0.009754	0.001059	-0.01691	-0.01455
65.2	0.037779	0.009396	0.000474	-0.0172	-0.01489
65.4	0.03797	0.009453	0.000203	-0.017	-0.01512
65.6	0.03869	0.009793	0.000196	-0.01615	-0.01474
65.8	0.038701	0.009771	0.000449	-0.01589	-0.0144
66	0.039024	0.009848	0.000485	-0.01553	-0.01433
66.2	0.03934	0.010128	0.000861	-0.0149	-0.01407
66.4	0.039134	0.010283	0.000943	-0.0153	-0.01407
66.6	0.039696	0.010619	0.001473	-0.01473	-0.01346
66.8	0.04029	0.011263	0.001819	-0.01427	-0.01307
67	0.039638	0.011014	0.001894	-0.01453	-0.01345
67.2	0.039546	0.010969	0.002075	-0.01457	-0.0133
67.4	0.039463	0.011033	0.001999	-0.01506	-0.01332
67.6	0.039115	0.011418	0.00232	-0.01524	-0.01311
67.8	0.038892	0.011531	0.002024	-0.01518	-0.0134
68	0.038437	0.011426	0.001527	-0.01544	-0.01346
68.2	0.037499	0.01072	0.001146	-0.01597	-0.01385
68.4	0.037284	0.010842	0.000542	-0.01634	-0.01415
68.6	0.037057	0.010343	5.2e-05	-0.01682	-0.01438
68.8	0.036136	0.009701	-0.00032	-0.01753	-0.01472
69	0.036106	0.009627	-0.00018	-0.01752	-0.01512
69.2	0.036168	0.009651	-0.00056	-0.01785	-0.01535
69.4	0.036379	0.010273	-0.0005	-0.01745	-0.01505
69.6	0.036712	0.010045	-0.00032	-0.01747	-0.01493
69.8	0.036545	0.010091	-4e-08	-0.01751	-0.01475
70	0.036635	0.009691	6.62e-05	-0.01753	-0.01462
70.2	0.036521	0.00963	0.000192	-0.01774	-0.01446
70.4	0.036823	0.0099	0.000477	-0.01766	-0.01424
70.6	0.037142	0.010325	0.000989	-0.01725	-0.01381
70.8	0.037251	0.01056	0.00141	-0.01683	-0.01353
71	0.036979	0.010615	0.001736	-0.01702	-0.01336
71.2	0.037785	0.010814	0.001736	-0.01675	-0.01305
71.4	0.037987	0.011157	0.001486	-0.01642	-0.01293
71.6	0.038353	0.011657	0.002211	-0.01605	-0.01239
71.8	0.037857	0.011467	0.001938	-0.01598	-0.01227
72	0.037746	0.011031	0.001841	-0.01616	-0.01206
72.2	0.037754	0.010765	0.001422	-0.01648	-0.01245
72.4	0.037625	0.010613	0.000415	-0.01688	-0.01265
72.6	0.037167	0.009887	0.000416	-0.01732	-0.01253
72.8	0.03674	0.009654	4.58e-05	-0.01809	-0.01286
73	0.037404	0.010116	0.000697	-0.01769	-0.01246
73.2	0.037052	0.009671	0.000351	-0.01802	-0.01244
73.4	0.036776	0.010015	0.000582	-0.01809	-0.01246
73.6	0.036457	0.009644	0.000763	-0.01824	-0.01274
73.8	0.036347	0.009591	0.000761	-0.01818	-0.01286
74	0.035775	0.009631	0.00084	-0.01804	-0.01303
74.2	0.035471	0.009903	0.000905	-0.01785	-0.01307
74.4	0.034465	0.009549	0.000722	-0.01791	-0.01431
74.6	0.034535	0.009853	0.000897	-0.01755	-0.01442
74.8	0.034809	0.009876	0.001184	-0.0167	-0.01444
75	0.035277	0.009986	0.001218	-0.01657	-0.01464
75.2	0.035339	0.009721	0.001119	-0.01619	-0.01483
75.4	0.035446	0.009699	0.000735	-0.01606	-0.0149
75.6	0.035566	0.009469	0.000756	-0.01606	-0.01488
75.8	0.035309	0.008825	0.000171	-0.01624	-0.01534
76	0.035473	0.008131	-0.00029	-0.01635	-0.01591
76.2	0.0354	0.007514	-0.00078	-0.01646	-0.01597
76.4	0.034904	0.006508	-0.0016	-0.01692	-0.01612
76.6	0.035496	0.006879	-0.00091	-0.01647	-0.01541
76.8	0.036033	0.007222	-0.001	-0.01655	-0.01537
77	0.035917	0.007575	-0.00066	-0.01606	-0.01493
77.2	0.035757	0.007852	1.5e-05	-0.01564	-0.0146
77.4	0.03582	0.008274	0.000482	-0.01559	-0.01455
77.6	0.035527	0.008454	0.000609	-0.01562	-0.01446
77.8	0.03542	0.008456	0.00058	-0.01588	-0.01457
78	0.035	0.009115	0.000824	-0.01587	-0.01452
78.2	0.034622	0.008916	0.000704	-0.01616	-0.01478
78.4	0.034425	0.009248	0.000558	-0.01629	-0.01506
78.6	0.034791	0.009864	0.000639	-0.01606	-0.01461
78.8	0.034806	0.009622	0.000806	-0.0162	-0.01441
79	0.034545	0.009725	0.000209	-0.01676	-0.01444
79.2	0.034194	0.009477	-0.00034	-0.01731	-0.01457
79.4	0.033776	0.009636	-0.00133	-0.01837	-0.01567
79.6	0.033585	0.009408	-0.00117	-0.01818	-0.016
79.8	0.033065	0.008764	-0.00148	-0.01837	-0.01649
80	0.032669	0.008143	-0.00141	-0.01875	-0.01645
80.2	0.032203	0.007864	-0.0015	-0.01891	-0.01617
80.4	0.03174	0.007765	-0.00156	-0.01919	-0.01582
80.6	0.032014	0.008397	-0.00089	-0.01837	-0.01491
80.8	0.031583	0.008169	-0.0009	-0.0187	-0.01507
81	0.030594	0.00739	-0.00109	-0.01867	-0.01542
81.2	0.03037	0.007563	-0.00054	-0.01849	-0.01502
81.4	0.029959	0.007365	-0.00078	-0.01872	-0.0148
81.6	0.029348	0.007161	-0.00086	-0.01874	-0.01481
81.8	0.029083	0.006824	-0.00093	-0.01902	-0.01507
82	0.029421	0.007038	-0.0008	-0.01854	-0.01452
82.2	0.029587	0.007078	-0.0009	-0.01836	-0.01437
82.4	0.030352	0.008009	-0.00066	-0.01814	-0.01398
82.6	0.030353	0.007447	-0.00086	-0.01892	-0.01456
82.8	0.030631	0.007515	-0.00053	-0.01921	-0.01449
83	0.030555	0.007197	-0.00118	-0.01968	-0.01526
83.2	0.030777	0.007293	-0.00135	-0.01994	-0.01558
83.4	0.030906	0.007301	-0.0016	-0.02014	-0.01656
83.6	0.031716	0.007286	-0.0007	-0.01951	-0.01642
83.8	0.032039	0.006998	-0.00091	-0.01988	-0.01648
84	0.032232	0.006488	-0.00078	-0.02039	-0.01634
84.2	0.032517	0.006394	-0.00118	-0.02051	-0.01645
84.4	0.032726	0.005711	-0.00121	-0.02043	-0.01644
84.6	0.03269	0.005282	-0.00108	-0.02028	-0.01662
84.8	0.032345	0.004567	-0.00141	-0.02054	-0.01677
85	0.032079	0.004223	-0.00196	-0.02062	-0.01673
85.2	0.032263	0.004859	-0.00135	-0.02037	-0.01597
85.4	0.031773	0.005173	-0.00129	-0.02008	-0.0155
85.6	0.03073	0.004455	-0.00174	-0.02067	-0.01566
85.8	0.03109	0.004721	-0.00165	-0.0203	-0.0155
86	0.031152	0.005348	-0.00151	-0.01991	-0.01484
86.2	0.031312	0.005937	-0.0012	-0.01997	-0.01486
86.4	0.031471	0.006447	-0.00132	-0.0203	-0.01505
86.6	0.030938	0.006242	-0.00105	-0.02039	-0.01521
86.8	0.030613	0.006415	-0.00081	-0.0204	-0.01512
87	0.030478	0.006439	-0.00103	-0.02028	-0.01544
87.2	0.030699	0.0074	-0.00078	-0.01976	-0.01501
87.4	0.03111	0.007327	-0.00046	-0.01961	-0.01568
87.6	0.031472	0.007914	-7.1e-05	-0.01921	-0.01535
87.8	0.031778	0.007944	-0.00014	-0.01938	-0.01527
88	0.031518	0.007624	-0.00064	-0.01934	-0.01555
88.2	0.031468	0.007422	-0.00106	-0.01962	-0.01624
88.4	0.031405	0.006945	-0.00087	-0.01971	-0.0161
88.6	0.031108	0.007161	-0.00085	-0.01972	-0.01601
88.8	0.031195	0.007086	-0.00101	-0.0198	-0.01586
89	0.031039	0.006999	-0.00129	-0.02044	-0.0161
89.2	0.030429	0.006636	-0.00153	-0.02061	-0.01622
89.4	0.030023	0.006366	-0.00177	-0.02076	-0.01609
89.6	0.030064	0.005657	-0.00235	-0.02139	-0.0164
89.8	0.030422	0.006044	-0.00235	-0.02076	-0.01657
90	0.029396	0.005921	-0.00294	-0.02116	-0.01669
90.2	0.028639	0.005557	-0.0033	-0.02149	-0.01727
90.4	0.028394	0.005833	-0.00335	-0.02105	-0.01707
90.6	0.028219	0.005975	-0.00266	-0.02053	-0.01699
90.8	0.028169	0.005574	-0.00295	-0.02074	-0.01705
91	0.028591	0.006036	-0.00269	-0.02023	-0.01686
91.2	0.028693	0.005877	-0.00223	-0.01979	-0.01661
91.4	0.028411	0.004813	-0.00234	-0.01957	-0.01723
91.6	0.028534	0.005444	-0.00202	-0.01902	-0.01661
91.8	0.02892	0.005407	-0.00171	-0.01881	-0.01637
92	0.028891	0.00552	-0.00175	-0.01836	-0.01585
92.2	0.028877	0.005169	-0.0015	-0.01815	-0.0161
92.4	0.028827	0.005369	-0.00084	-0.0175	-0.01539
92.6	0.028666	0.005123	-0.00079	-0.01769	-0.01573
92.8	0.029089	0.005172	-0.00056	-0.0176	-0.01541
93	0.029179	0.005555	-0.00039	-0.01777	-0.01497
93.2	0.029244	0.005664	-0.0006	-0.01749	-0.01507
93.4	0.029399	0.005765	-0.00049	-0.01758	-0.01479
93.6	0.029757	0.005981	-0.00066	-0.01774	-0.01436
93.8	0.029553	0.006046	-0.00087	-0.01795	-0.01445
94	0.029219	0.006128	-0.00093	-0.0183	-0.01441
94.2	0.029399	0.006451	-0.00066	-0.01844	-0.01442
94.4	0.029961	0.007152	0.000118	-0.01805	-0.01362
94.6	0.030173	0.007333	0.00062	-0.01835	-0.01316
94.8	0.029852	0.006605	0.000305	-0.01899	-0.01361
95	0.029463	0.006295	-3.4e-05	-0.01958	-0.01393
95.2	0.028685	0.00581	4.06e-06	-0.01969	-0.01446
95.4	0.028129	0.005185	-0.00057	-0.01995	-0.015
95.6	0.028287	0.005666	-0.00065	-0.02007	-0.01507
95.8	0.028089	0.00537	-0.00114	-0.02007	-0.01525
96	0.028134	0.005296	-0.00122	-0.01997	-0.01534
96.2	0.027506	0.004064	-0.00161	-0.02044	-0.01654
96.4	0.027138	0.004191	-0.00189	-0.02063	-0.01668
96.6	0.027479	0.003528	-0.00259	-0.02096	-0.01722
96.8	0.027484	0.003901	-0.00255	-0.02075	-0.01677
97	0.027513	0.003703	-0.00276	-0.02058	-0.0166
97.2	0.027287	0.002853	-0.00375	-0.02082	-0.01744
97.4	0.02732	0.002684	-0.00384	-0.02076	-0.01726
97.6	0.027639	0.003269	-0.00375	-0.02055	-0.01673
97.8	0.028067	0.003312	-0.00361	-0.02034	-0.01688
98	0.028705	0.003741	-0.00306	-0.01958	-0.01615
98.2	0.028694	0.004382	-0.00274	-0.01902	-0.01551
98.4	0.028572	0.004697	-0.00217	-0.01827	-0.01502
98.6	0.028466	0.005144	-0.00206	-0.01812	-0.01471
98.8	0.027759	0.005007	-0.00247	-0.01844	-0.01505
99	0.02688	0.004931	-0.00316	-0.01872	-0.01519
99.2	0.0268	0.004883	-0.00325	-0.01865	-0.01551
99.4	0.026847	0.004663	-0.00351	-0.01907	-0.01562
99.6	0.027265	0.005224	-0.00323	-0.01902	-0.01545
99.8	0.027581	0.005362	-0.00299	-0.01915	-0.01535
100	0.027814	0.005347	-0.00248	-0.01921	-0.01543
100.2	0.027159	0.004843	-0.0028	-0.01956	-0.01575
100.4	0.027484	0.005405	-0.00274	-0.01901	-0.01522
100.6	0.027786	0.005098	-0.00257	-0.01884	-0.01493
100.8	0.027938	0.005145	-0.00203	-0.0185	-0.0147
101	0.027794	0.004682	-0.00212	-0.01821	-0.01454
101.2	0.027338	0.004312	-0.00267	-0.01851	-0.0153
101.4	0.027072	0.00433	-0.00234	-0.01807	-0.01505
101.6	0.026692	0.004289	-0.0023	-0.01825	-0.01515
101.8	0.026887	0.003817	-0.00191	-0.01845	-0.01532
102	0.026179	0.003502	-0.00227	-0.01892	-0.01562
102.2	0.025335	0.003228	-0.00312	-0.01942	-0.01612
102.4	0.024263	0.002112	-0.00402	-0.02033	-0.01706
102.6	0.024124	0.001979	-0.00443	-0.02091	-0.01749
102.8	0.023876	0.001418	-0.00464	-0.02154	-0.01794
103	0.023972	0.001007	-0.00477	-0.02178	-0.01877
103.2	0.02473	0.001228	-0.00408	-0.02156	-0.01866
103.4	0.024615	0.001563	-0.00381	-0.02162	-0.01858
103.6	0.024848	0.00238	-0.00326	-0.02159	-0.01845
103.8	0.024798	0.002462	-0.00299	-0.02193	-0.01848
104	0.024163	0.002513	-0.00267	-0.02181	-0.01815
104.2	0.024087	0.002744	-0.00244	-0.02171	-0.0177
104.4	0.02466	0.003551	-0.00177	-0.02084	-0.01699
104.6	0.025062	0.004186	-0.00098	-0.0201	-0.01653
104.8	0.02496	0.004757	-0.00054	-0.01926	-0.01629
105	0.024502	0.004636	-0.00073	-0.01929	-0.01582
105.2	0.023957	0.004437	-0.00082	-0.01924	-0.01625
105.4	0.023779	0.004161	-0.00092	-0.01918	-0.01613
105.6	0.023837	0.004077	-0.00073	-0.01959	-0.01585
105.8	0.023934	0.00418	-0.00088	-0.01967	-0.01547
106	0.023171	0.003353	-0.00211	-0.02033	-0.01641
106.2	0.023057	0.002866	-0.0029	-0.02035	-0.01658
106.4	0.022971	0.002356	-0.00279	-0.02026	-0.01686
106.6	0.024074	0.002928	-0.00232	-0.0199	-0.01674
106.8	0.024121	0.002975	-0.00236	-0.02007	-0.01662
107	0.024675	0.003413	-0.00214	-0.0197	-0.01625
107.2	0.024972	0.003771	-0.00197	-0.01926	-0.0159
107.4	0.02485	0.003569	-0.00232	-0.01948	-0.01594
107.6	0.024756	0.003299	-0.00216	-0.01975	-0.01574
107.8	0.024047	0.002691	-0.00232	-0.0203	-0.01589
108	0.023928	0.002778	-0.0018	-0.02057	-0.01541
108.2	0.024052	0.003214	-0.00155	-0.02027	-0.01509
108.4	0.024186	0.00367	-0.00145	-0.02017	-0.01496
108.6	0.023557	0.003563	-0.00149	-0.02081	-0.01548
108.8	0.02297	0.003008	-0.00192	-0.02072	-0.01566
109	0.022262	0.002906	-0.00206	-0.0213	-0.01558
109.2	0.021697	0.002868	-0.00218	-0.02147	-0.01602
109.4	0.022277	0.003162	-0.00254	-0.02147	-0.01539
109.6	0.021892	0.003321	-0.00269	-0.02137	-0.01532
109.8	0.021553	0.00334	-0.00347	-0.02145	-0.01559
110	0.021145	0.002816	-0.00409	-0.02163	-0.01609
110.2	0.020921	0.002877	-0.00445	-0.02147	-0.01594
110.4	0.021111	0.002682	-0.00456	-0.02158	-0.01609
110.6	0.021422	0.002822	-0.00481	-0.02203	-0.01599
110.8	0.021379	0.003042	-0.0051	-0.02212	-0.01604
111	0.022401	0.003354	-0.00481	-0.02169	-0.01578
111.2	0.022696	0.003762	-0.00483	-0.02104	-0.0159
111.4	0.022655	0.003311	-0.00498	-0.02105	-0.01612
111.6	0.022553	0.002998	-0.00499	-0.02109	-0.0158
111.8	0.02283	0.002815	-0.00484	-0.02105	-0.01575
112	0.023496	0.002868	-0.00431	-0.02058	-0.01522
112.2	0.023409	0.002708	-0.00438	-0.02021	-0.01535
112.4	0.023545	0.002283	-0.0045	-0.02072	-0.01551
112.6	0.022989	0.001854	-0.00452	-0.02069	-0.01578
112.8	0.023121	0.001956	-0.00425	-0.02004	-0.01565
113	0.022672	0.0019	-0.00446	-0.01998	-0.01615
113.2	0.022801	0.002322	-0.00451	-0.01944	-0.0162
113.4	0.022675	0.002077	-0.00478	-0.01927	-0.01642
113.6	0.021703	0.001348	-0.00531	-0.02001	-0.01739
113.8	0.02149	0.001113	-0.00525	-0.02084	-0.01764
114	0.021277	0.000628	-0.00486	-0.02085	-0.01796
114.2	0.020426	-0.00022	-0.00562	-0.02157	-0.01907
114.4	0.020125	-0.00053	-0.00521	-0.02169	-0.0191
114.6	0.019616	-0.00059	-0.00469	-0.0221	-0.01929
114.8	0.019412	-0.00048	-0.00455	-0.02234	-0.01938
115	0.019609	-0.00045	-0.0044	-0.02263	-0.01951
115.2	0.019302	-0.00041	-0.00449	-0.02238	-0.01944
115.4	0.019264	-0.00135	-0.00467	-0.02286	-0.01936
115.6	0.019195	-0.00146	-0.00456	-0.02279	-0.01862
115.8	0.019614	-0.00112	-0.00413	-0.02239	-0.01806
116	0.019737	-0.00075	-0.00372	-0.02209	-0.01796
116.2	0.019707	-0.00119	-0.00414	-0.02251	-0.01785
116.4	0.020084	-0.00085	-0.00379	-0.02233	-0.01712
116.6	0.020339	-0.00025	-0.00342	-0.02137	-0.0167
116.8	0.020529	0.000237	-0.00342	-0.0207	-0.01632
117	0.02043	0.000556	-0.00366	-0.0203	-0.01641
117.2	0.020343	0.000962	-0.00323	-0.0202	-0.01581
117.4	0.020718	0.000971	-0.00333	-0.02062	-0.0158
117.6	0.020377	0.001117	-0.00388	-0.02125	-0.01618
117.8	0.020597	0.001641	-0.0035	-0.021	-0.016
118	0.02067	0.001723	-0.00355	-0.02065	-0.01601
118.2	0.019988	0.001397	-0.00433	-0.02141	-0.01657
118.4	0.019728	0.001623	-0.00401	-0.02105	-0.01606
118.6	0.019549	0.000934	-0.00423	-0.02183	-0.01672
118.8	0.019514	0.000662	-0.00461	-0.02247	-0.01678
119	0.01997	0.000439	-0.0046	-0.02248	-0.01716
119.2	0.019543	-0.00064	-0.0051	-0.02303	-0.01759
119.4	0.019476	-0.00129	-0.00556	-0.02349	-0.01791
119.6	0.019469	-0.00064	-0.00516	-0.02317	-0.01762
119.8	0.019573	-0.00076	-0.00531	-0.02338	-0.01783
120	0.019569	-0.00114	-0.00522	-0.02337	-0.01823
120.2	0.018925	-0.00197	-0.00565	-0.02393	-0.0186
120.4	0.019043	-0.00178	-0.00524	-0.02347	-0.01846
120.6	0.018709	-0.00219	-0.0053	-0.02341	-0.01862
120.8	0.017875	-0.00275	-0.00564	-0.02415	-0.01874
121	0.01751	-0.00302	-0.00556	-0.02407	-0.01863
121.2	0.017942	-0.00256	-0.00491	-0.02358	-0.01818
121.4	0.018234	-0.00187	-0.00508	-0.02334	-0.01828
121.6	0.017576	-0.00172	-0.00548	-0.02297	-0.01868
121.8	0.017572	-0.00175	-0.00518	-0.02313	-0.01867
122	0.017354	-0.00211	-0.00523	-0.02328	-0.01854
122.2	0.017157	-0.00175	-0.00538	-0.02322	-0.01824
122.4	0.016934	-0.00169	-0.00554	-0.02262	-0.01811
122.6	0.016582	-0.00223	-0.00567	-0.02279	-0.01873
122.8	0.016101	-0.00183	-0.00608	-0.0228	-0.01872
123	0.017075	-0.00157	-0.00597	-0.0221	-0.01839
123.2	0.016838	-0.00149	-0.00631	-0.02251	-0.01828
123.4	0.016857	-0.00085	-0.00638	-0.02254	-0.01815
123.6	0.016997	-2.9e-05	-0.00581	-0.02214	-0.01789
123.8	0.016742	-0.00067	-0.00605	-0.02272	-0.01837
124	0.016842	-0.00054	-0.00592	-0.0225	-0.01861
124.2	0.01628	-0.00102	-0.00635	-0.02311	-0.01915
124.4	0.016646	-0.0014	-0.00659	-0.02318	-0.01875
124.6	0.016203	-0.00166	-0.00638	-0.02306	-0.01842
124.8	0.015695	-0.0018	-0.00644	-0.02339	-0.01825
125	0.01548	-0.002	-0.00651	-0.02316	-0.01838
125.2	0.015891	-0.00138	-0.00638	-0.0233	-0.01858
125.4	0.015013	-0.00242	-0.00752	-0.02385	-0.01928
125.6	0.014547	-0.00309	-0.00789	-0.02422	-0.01933
125.8	0.01453	-0.00367	-0.00767	-0.02458	-0.01914
126	0.014602	-0.00382	-0.00772	-0.02447	-0.01877
126.2	0.015002	-0.00317	-0.008	-0.02425	-0.01863
126.4	0.01444	-0.00394	-0.0083	-0.02433	-0.01932
126.6	0.014523	-0.00378	-0.00806	-0.02454	-0.01934
126.8	0.015022	-0.00325	-0.00755	-0.02417	-0.01866
127	0.016299	-0.00265	-0.0061	-0.02315	-0.0176
127.2	0.016967	-0.0019	-0.00517	-0.02271	-0.01745
127.4	0.017104	-0.00179	-0.00475	-0.02267	-0.01765
127.6	0.017158	-0.00161	-0.00417	-0.02206	-0.01772
127.8	0.017267	-0.0016	-0.00402	-0.02198	-0.01761
128	0.017632	-0.00102	-0.00369	-0.02152	-0.01726
128.2	0.018056	-0.00097	-0.00361	-0.02147	-0.01674
128.4	0.018746	-0.0005	-0.00317	-0.02069	-0.01647
128.6	0.018926	-0.00025	-0.00292	-0.0201	-0.01632
128.8	0.018704	-0.00029	-0.00337	-0.02075	-0.0165
129	0.018644	-6.4e-05	-0.00379	-0.02055	-0.01688
129.2	0.018477	-0.00014	-0.00421	-0.02089	-0.01715
129.4	0.017717	-0.00106	-0.00515	-0.02179	-0.01743
129.6	0.017682	-0.00098	-0.00507	-0.02215	-0.01684
129.8	0.017172	-0.00144	-0.00549	-0.02285	-0.01716
130	0.016728	-0.00154	-0.00623	-0.02367	-0.01753
130.2	0.016454	-0.00129	-0.00656	-0.02385	-0.01738
130.4	0.015813	-0.00169	-0.00662	-0.02437	-0.0177
130.6	0.015845	-0.00149	-0.00619	-0.02451	-0.01726
130.8	0.015945	-0.0014	-0.00557	-0.02387	-0.01682
131	0.016036	-0.0011	-0.00494	-0.02345	-0.01629
131.2	0.015733	-0.00163	-0.00552	-0.02353	-0.0165
131.4	0.015194	-0.0017	-0.00554	-0.02373	-0.01668
131.6	0.01498	-0.00181	-0.00539	-0.02364	-0.01661
131.8	0.01515	-0.0016	-0.00533	-0.02307	-0.01623
132	0.015324	-0.0014	-0.00484	-0.0228	-0.01607
132.2	0.015732	-0.00191	-0.00518	-0.02263	-0.01648
132.4	0.016239	-0.00166	-0.00483	-0.02206	-0.01681
132.6	0.01652	-0.00138	-0.0047	-0.02209	-0.01673
132.8	0.016876	-0.00086	-0.00448	-0.02181	-0.01652
133	0.016735	-0.0008	-0.00451	-0.02127	-0.0165
133.2	0.016619	-0.001	-0.00464	-0.02135	-0.0165
133.4	0.016682	-0.00089	-0.00457	-0.02099	-0.0162
133.6	0.016536	-0.0013	-0.00429	-0.02084	-0.01604
133.8	0.016366	-0.00182	-0.00454	-0.02097	-0.01633
134	0.016395	-0.0016	-0.00467	-0.02102	-0.01618
134.2	0.016314	-0.00143	-0.00438	-0.02081	-0.01617
134.4	0.016177	-0.00182	-0.00498	-0.02111	-0.01662
134.6	0.015849	-0.00215	-0.00477	-0.02106	-0.01624
134.8	0.01607	-0.00201	-0.00427	-0.02115	-0.01582
135	0.0156	-0.00212	-0.00427	-0.02111	-0.01558
135.2	0.015628	-0.00211	-0.00436	-0.02135	-0.0157
135.4	0.014945	-0.00189	-0.00443	-0.02139	-0.01594
135.6	0.014861	-0.00212	-0.00476	-0.02136	-0.01601
135.8	0.014176	-0.00201	-0.00505	-0.02152	-0.01589
136	0.014294	-0.00229	-0.00512	-0.02216	-0.01607
136.2	0.013995	-0.00249	-0.00569	-0.02259	-0.01675
136.4	0.014487	-0.00168	-0.00548	-0.02287	-0.017
136.6	0.014524	-0.00152	-0.00539	-0.02276	-0.01687
136.8	0.014391	-0.00169	-0.00554	-0.02254	-0.01693
137	0.014099	-0.00193	-0.00586	-0.02248	-0.01697
137.2	0.014464	-0.0019	-0.0058	-0.02203	-0.01728
137.4	0.014808	-0.00194	-0.00538	-0.02155	-0.01718
137.6	0.015158	-0.00254	-0.00536	-0.02208	-0.01755
137.8	0.015062	-0.00271	-0.00563	-0.02196	-0.01781
138	0.014858	-0.00299	-0.00599	-0.02216	-0.01843
138.2	0.014829	-0.00321	-0.00613	-0.02184	-0.01881
138.4	0.014888	-0.00346	-0.00636	-0.02154	-0.01856
138.6	0.014661	-0.00358	-0.00577	-0.0212	-0.01787
138.8	0.014392	-0.00357	-0.0057	-0.02154	-0.01821
139	0.014019	-0.0039	-0.00609	-0.02178	-0.01841
139.2	0.013709	-0.00369	-0.00602	-0.02192	-0.01828
139.4	0.012582	-0.00419	-0.00704	-0.02217	-0.01875
139.6	0.012545	-0.00406	-0.00721	-0.02209	-0.01892
139.8	0.011587	-0.00418	-0.00747	-0.02269	-0.01874
140	0.01147	-0.00423	-0.00753	-0.02298	-0.01901
140.2	0.011007	-0.00428	-0.00779	-0.02344	-0.01982
140.4	0.011303	-0.00442	-0.00803	-0.02427	-0.02038
140.6	0.010813	-0.00483	-0.00816	-0.02395	-0.02018
140.8	0.009994	-0.00515	-0.00868	-0.02472	-0.02087
141	0.010356	-0.00472	-0.00842	-0.02439	-0.02073
141.2	0.010315	-0.0049	-0.00816	-0.02433	-0.02084
141.4	0.010523	-0.00443	-0.0077	-0.02402	-0.0202
141.6	0.010458	-0.00475	-0.00766	-0.0241	-0.02031
141.8	0.010396	-0.00469	-0.00738	-0.02355	-0.01988
142	0.010874	-0.00501	-0.00747	-0.02377	-0.01955
142.2	0.011099	-0.00509	-0.00711	-0.02344	-0.01916
142.4	0.011072	-0.00514	-0.00652	-0.02297	-0.01882
142.6	0.01059	-0.00549	-0.00678	-0.02338	-0.01874
142.8	0.01087	-0.0052	-0.00669	-0.02391	-0.01842
143	0.011373	-0.00485	-0.00639	-0.02387	-0.01761
143.2	0.011519	-0.00402	-0.00605	-0.0238	-0.01739
143.4	0.011339	-0.00429	-0.00678	-0.02379	-0.01752
143.6	0.011479	-0.00414	-0.00624	-0.02353	-0.01726
143.8	0.011815	-0.00412	-0.006	-0.02343	-0.01669
144	0.012478	-0.00393	-0.00542	-0.02326	-0.01658
144.2	0.012988	-0.00411	-0.00577	-0.0232	-0.01673
144.4	0.012708	-0.00457	-0.00651	-0.02355	-0.01751
144.6	0.01205	-0.00491	-0.00693	-0.02315	-0.01753
144.8	0.011445	-0.00509	-0.00716	-0.02352	-0.01813
145	0.011819	-0.00517	-0.00698	-0.02284	-0.01826
145.2	0.010688	-0.00616	-0.00787	-0.02346	-0.01919
145.4	0.010493	-0.00631	-0.00828	-0.02326	-0.01939
145.6	0.010141	-0.00712	-0.00842	-0.02333	-0.01989
145.8	0.00953	-0.0077	-0.00897	-0.02358	-0.02011
146	0.008626	-0.00865	-0.00998	-0.02423	-0.02072
146.2	0.007842	-0.00914	-0.01038	-0.0243	-0.02121
146.4	0.007063	-0.00934	-0.01075	-0.02444	-0.02147
146.6	0.007528	-0.00906	-0.01072	-0.02478	-0.02091
146.8	0.008247	-0.00853	-0.00986	-0.02476	-0.02033
147	0.008317	-0.00835	-0.00951	-0.02469	-0.02043
147.2	0.008811	-0.00819	-0.00921	-0.02451	-0.01997
147.4	0.008971	-0.00818	-0.0089	-0.0241	-0.01923
147.6	0.009448	-0.00745	-0.00802	-0.0235	-0.01869
147.8	0.01003	-0.00682	-0.00786	-0.02305	-0.01819
148	0.010711	-0.0061	-0.00754	-0.02283	-0.01769
148.2	0.011054	-0.00591	-0.00788	-0.02282	-0.01733
148.4	0.010972	-0.00574	-0.00819	-0.0229	-0.01748
148.6	0.011352	-0.00522	-0.00766	-0.02304	-0.01713
148.8	0.01207	-0.00437	-0.00664	-0.02264	-0.017
149	0.01213	-0.00473	-0.00668	-0.02305	-0.01731
149.2	0.011325	-0.00505	-0.007	-0.02325	-0.01811
149.4	0.01134	-0.00541	-0.00684	-0.02348	-0.01822
149.6	0.010436	-0.00608	-0.00682	-0.02387	-0.01868
149.8	0.009645	-0.00636	-0.00725	-0.02485	-0.0188
150	0.009162	-0.00638	-0.00744	-0.025	-0.01882
150.2	0.009043	-0.00626	-0.00718	-0.02502	-0.01845
150.4	0.00915	-0.00656	-0.00651	-0.02486	-0.01862
150.6	0.009604	-0.00713	-0.00618	-0.02527	-0.01903
150.8	0.009079	-0.00795	-0.00619	-0.02532	-0.01957
151	0.008856	-0.00821	-0.00661	-0.02525	-0.01971
151.2	0.008858	-0.00826	-0.00678	-0.02515	-0.01958
151.4	0.008677	-0.00831	-0.00745	-0.02549	-0.02006
151.6	0.008703	-0.00818	-0.00791	-0.02523	-0.02028
151.8	0.008485	-0.00835	-0.0082	-0.02536	-0.0204
152	0.008709	-0.0083	-0.00841	-0.02538	-0.01995
152.2	0.00862	-0.00887	-0.00923	-0.02535	-0.01989
152.4	0.008748	-0.0082	-0.00903	-0.02499	-0.01974
152.6	0.008397	-0.00825	-0.00887	-0.02502	-0.01992
152.8	0.00817	-0.00794	-0.00886	-0.02471	-0.01981
153	0.007583	-0.00835	-0.00924	-0.02491	-0.02004
153.2	0.007399	-0.0079	-0.00896	-0.0246	-0.01985
153.4	0.006924	-0.00827	-0.0093	-0.02542	-0.02
153.6	0.006517	-0.00789	-0.0094	-0.02555	-0.01994
153.8	0.006812	-0.00723	-0.00923	-0.02554	-0.01924
154	0.006966	-0.0065	-0.00888	-0.02459	-0.01848
154.2	0.007078	-0.00621	-0.0087	-0.02438	-0.01836
154.4	0.006913	-0.00642	-0.00825	-0.02426	-0.01853
154.6	0.006595	-0.00655	-0.00883	-0.02465	-0.0191
154.8	0.006886	-0.00647	-0.0085	-0.02459	-0.01874
155	0.006999	-0.00655	-0.00835	-0.0253	-0.0189
155.2	0.006711	-0.00668	-0.00843	-0.02579	-0.01934
155.4	0.006477	-0.00719	-0.00884	-0.02638	-0.01959
155.6	0.006264	-0.00717	-0.00863	-0.02621	-0.01949
155.8	0.005713	-0.00807	-0.00849	-0.02642	-0.01973
156	0.006389	-0.00812	-0.00837	-0.02608	-0.01902
156.2	0.006206	-0.00853	-0.00855	-0.02595	-0.01911
156.4	0.005941	-0.00888	-0.00851	-0.0259	-0.01945
156.6	0.005369	-0.00995	-0.00949	-0.02642	-0.02019
156.8	0.005308	-0.01029	-0.01002	-0.02639	-0.02029
157	0.005308	-0.01025	-0.01001	-0.02614	-0.02038
157.2	0.005799	-0.01005	-0.00993	-0.02589	-0.02017
157.4	0.005857	-0.0107	-0.01056	-0.02612	-0.02061
157.6	0.006317	-0.01069	-0.0107	-0.02585	-0.02079
157.8	0.006754	-0.01032	-0.01079	-0.02497	-0.02044
158	0.007086	-0.01007	-0.01035	-0.02444	-0.01972
158.2	0.006929	-0.01049	-0.01072	-0.02436	-0.01982
158.4	0.006426	-0.01075	-0.01078	-0.02457	-0.01975
158.6	0.006257	-0.01094	-0.01114	-0.02546	-0.01986
158.8	0.006266	-0.01104	-0.01093	-0.02599	-0.0199
159	0.005679	-0.01103	-0.01115	-0.02673	-0.0205
159.2	0.005719	-0.0104	-0.01112	-0.02689	-0.02042
159.4	0.006166	-0.00987	-0.01067	-0.02677	-0.01982
159.6	0.006408	-0.0093	-0.00995	-0.02655	-0.01953
159.8	0.006559	-0.00908	-0.0096	-0.02606	-0.01931
160	0.006887	-0.00857	-0.00967	-0.02558	-0.01894
160.2	0.007141	-0.00854	-0.00976	-0.02575	-0.01924
160.4	0.006617	-0.00892	-0.01067	-0.02597	-0.01974
160.6	0.006175	-0.00856	-0.01108	-0.02617	-0.01995
160.8	0.006273	-0.00818	-0.01093	-0.02573	-0.01961
161	0.006218	-0.00759	-0.01085	-0.0256	-0.01977
161.2	0.007013	-0.0077	-0.01065	-0.02579	-0.01991
161.4	0.006987	-0.0082	-0.0108	-0.02594	-0.02016
161.6	0.007063	-0.00837	-0.01063	-0.02556	-0.02013
161.8	0.006649	-0.00839	-0.01062	-0.02519	-0.02007
162	0.007069	-0.00851	-0.01008	-0.02497	-0.01923
162.2	0.006615	-0.009	-0.01065	-0.02511	-0.01962
162.4	0.006462	-0.0092	-0.01055	-0.02526	-0.01976
162.6	0.005929	-0.00924	-0.01042	-0.02571	-0.01986
162.8	0.005803	-0.00913	-0.01007	-0.02527	-0.01975
163	0.006093	-0.00864	-0.00977	-0.02511	-0.01949
163.2	0.006455	-0.00854	-0.0094	-0.02497	-0.01916
163.4	0.006415	-0.0085	-0.00903	-0.02475	-0.01909
163.6	0.005759	-0.00876	-0.00913	-0.02487	-0.01962
163.8	0.00527	-0.00919	-0.0095	-0.0249	-0.01983
164	0.004637	-0.00947	-0.00988	-0.02518	-0.02004
164.2	0.00439	-0.00963	-0.00981	-0.02555	-0.01994
164.4	0.002848	-0.01006	-0.01091	-0.02633	-0.02044
164.6	0.003024	-0.0099	-0.0107	-0.02646	-0.02066
164.8	0.003604	-0.00981	-0.01075	-0.02686	-0.02065
165	0.003018	-0.0102	-0.01122	-0.0278	-0.02136
165.2	0.003082	-0.0105	-0.01128	-0.02816	-0.02143
165.4	0.002745	-0.01074	-0.01187	-0.02807	-0.02145
165.6	0.002999	-0.01024	-0.01144	-0.02747	-0.02088
165.8	0.00274	-0.01041	-0.01187	-0.02719	-0.02103
166	0.003304	-0.01027	-0.01199	-0.02697	-0.02098
166.2	0.002981	-0.01068	-0.01217	-0.02683	-0.02132
166.4	0.003165	-0.01091	-0.01204	-0.02661	-0.02115
166.6	0.002723	-0.01138	-0.01185	-0.02678	-0.02085
166.8	0.003193	-0.01161	-0.01153	-0.02631	-0.02059
167	0.00383	-0.01154	-0.01113	-0.02596	-0.02086
167.2	0.003626	-0.01209	-0.01114	-0.02573	-0.02143
167.4	0.003429	-0.01179	-0.01098	-0.02564	-0.02181
167.6	0.003556	-0.01211	-0.01111	-0.02548	-0.0218
167.8	0.003352	-0.01216	-0.01109	-0.0258	-0.02127
168	0.00356	-0.01185	-0.01087	-0.02557	-0.02096
168.2	0.003422	-0.01154	-0.01041	-0.02582	-0.02055
168.4	0.003348	-0.01118	-0.01042	-0.02656	-0.02075
168.6	0.004269	-0.01076	-0.00979	-0.02631	-0.02035
168.8	0.003921	-0.01094	-0.01044	-0.02718	-0.02034
169	0.003701	-0.01109	-0.01078	-0.02757	-0.02055
169.2	0.003854	-0.01058	-0.01079	-0.02748	-0.02009
169.4	0.003732	-0.01082	-0.01102	-0.02797	-0.02009
169.6	0.003753	-0.01065	-0.01089	-0.028	-0.01999
169.8	0.00305	-0.01155	-0.0116	-0.02843	-0.02056
170	0.003185	-0.01134	-0.01112	-0.02858	-0.02074
170.2	0.00316	-0.01182	-0.011	-0.02835	-0.0204
170.4	0.003102	-0.01231	-0.01082	-0.02876	-0.02053
170.6	0.00279	-0.01276	-0.01071	-0.02882	-0.02063
170.8	0.002601	-0.01263	-0.01084	-0.02861	-0.02133
171	0.002824	-0.01232	-0.0108	-0.02821	-0.02122
171.2	0.003309	-0.01176	-0.01058	-0.02735	-0.02098
171.4	0.003981	-0.01093	-0.01021	-0.02684	-0.02047
171.6	0.004472	-0.01056	-0.0099	-0.02637	-0.01934
171.8	0.004481	-0.01021	-0.00948	-0.02634	-0.01854
172	0.004898	-0.00983	-0.00881	-0.02558	-0.01803
172.2	0.004661	-0.00949	-0.00825	-0.02559	-0.01779
172.4	0.00486	-0.00953	-0.00827	-0.02555	-0.018
172.6	0.004937	-0.00984	-0.00829	-0.02565	-0.01765
172.8	0.004696	-0.01	-0.00837	-0.02561	-0.01791
173	0.004941	-0.01	-0.00818	-0.02572	-0.01785
173.2	0.005001	-0.01002	-0.00812	-0.02564	-0.0173
173.4	0.005217	-0.01041	-0.00813	-0.02574	-0.0172
173.6	0.005026	-0.01038	-0.00791	-0.02553	-0.01744
173.8	0.004613	-0.01068	-0.00755	-0.0252	-0.01752
174	0.004961	-0.0106	-0.00736	-0.02525	-0.01788
174.2	0.004774	-0.01088	-0.00791	-0.02525	-0.01772
174.4	0.004654	-0.01081	-0.00825	-0.02529	-0.01824
174.6	0.004194	-0.01063	-0.00883	-0.0252	-0.01827
174.8	0.004139	-0.01015	-0.0093	-0.02498	-0.01854
175	0.004704	-0.00946	-0.00889	-0.02496	-0.01809
175.2	0.004913	-0.00917	-0.00882	-0.0247	-0.01849
175.4	0.004636	-0.00957	-0.0092	-0.02479	-0.01866
175.6	0.004267	-0.00963	-0.01005	-0.02485	-0.01871
175.8	0.004589	-0.00947	-0.00994	-0.02462	-0.01864
176	0.004382	-0.00917	-0.00981	-0.02459	-0.01892
176.2	0.003931	-0.00939	-0.0101	-0.02491	-0.01925
176.4	0.003443	-0.0094	-0.01051	-0.02557	-0.0192
176.6	0.00277	-0.00985	-0.01088	-0.02624	-0.01922
176.8	0.002579	-0.00954	-0.01105	-0.02623	-0.01915
177	0.002587	-0.00962	-0.01118	-0.02658	-0.01887
177.2	0.002385	-0.00985	-0.01146	-0.02679	-0.01887
177.4	0.001956	-0.01012	-0.01166	-0.02723	-0.01927
177.6	0.001423	-0.01014	-0.01138	-0.02721	-0.01974
177.8	0.001358	-0.01042	-0.01116	-0.02709	-0.01979
178	0.001483	-0.01041	-0.01137	-0.02728	-0.02012
178.2	0.000944	-0.0107	-0.01185	-0.02734	-0.02041
178.4	0.000484	-0.01122	-0.01209	-0.02728	-0.02103
178.6	-0.00022	-0.01115	-0.01176	-0.02736	-0.02102
178.8	-0.00028	-0.01092	-0.01166	-0.02734	-0.02128
179	-7.3e-06	-0.01102	-0.01127	-0.02742	-0.02152
179.2	-3.4e-05	-0.01149	-0.01169	-0.027	-0.022
179.4	-1.7e-05	-0.0121	-0.01213	-0.02697	-0.02221
179.6	0.000795	-0.01194	-0.01197	-0.02669	-0.02179
179.8	0.001413	-0.01189	-0.01138	-0.02669	-0.02114
180	0.001075	-0.01224	-0.01152	-0.0271	-0.02139
180.2	0.001272	-0.01195	-0.01132	-0.02689	-0.02059
180.4	0.001717	-0.01165	-0.01126	-0.02674	-0.01968
180.6	0.001469	-0.01194	-0.01165	-0.02694	-0.0198
180.8	0.001461	-0.01162	-0.01127	-0.02733	-0.01961
181	0.001438	-0.01163	-0.01083	-0.02706	-0.01935
181.2	0.000619	-0.01183	-0.01113	-0.02739	-0.01963
181.4	0.0001	-0.01179	-0.01101	-0.02699	-0.01944
181.6	0.000163	-0.01176	-0.01069	-0.02681	-0.01937
181.8	9.14e-05	-0.01202	-0.01081	-0.02683	-0.01926
182	-0.00021	-0.01224	-0.01087	-0.02703	-0.01965
182.2	-0.00077	-0.01272	-0.01125	-0.02748	-0.02034
182.4	-0.0012	-0.01257	-0.01108	-0.02743	-0.02031
182.6	-0.00153	-0.0121	-0.01082	-0.02756	-0.02042
182.8	-0.0011	-0.01187	-0.011	-0.02745	-0.0205
183	-0.00087	-0.01203	-0.01097	-0.02716	-0.02055
183.2	-0.00056	-0.01201	-0.01108	-0.02657	-0.02039
183.4	-0.00043	-0.01239	-0.01142	-0.02667	-0.02037
183.6	0.000188	-0.01254	-0.01116	-0.02666	-0.01999
183.8	0.000203	-0.01275	-0.01141	-0.0268	-0.01967
184	0.000243	-0.01218	-0.01103	-0.0267	-0.01995
184.2	0.000495	-0.01228	-0.01083	-0.02649	-0.01987
184.4	0.000644	-0.01269	-0.01136	-0.02663	-0.02009
184.6	0.000604	-0.01289	-0.01167	-0.02725	-0.02045
184.8	0.000998	-0.01285	-0.01099	-0.02727	-0.02049
185	0.000777	-0.01361	-0.01141	-0.02745	-0.02056
185.2	6.91e-05	-0.01468	-0.01195	-0.02819	-0.02109
185.4	-0.00014	-0.01466	-0.01226	-0.02858	-0.02098
185.6	0.000227	-0.01477	-0.0124	-0.02875	-0.02103
185.8	0.000725	-0.01448	-0.01185	-0.02835	-0.02055
186	0.000656	-0.01478	-0.01171	-0.02894	-0.0209
186.2	0.000126	-0.01448	-0.01162	-0.02916	-0.02116
186.4	-0.00056	-0.01472	-0.01202	-0.02919	-0.0216
186.6	-0.00123	-0.01444	-0.01195	-0.02877	-0.02172
186.8	-0.00105	-0.01422	-0.01208	-0.02824	-0.02166
187	-0.00121	-0.01425	-0.01224	-0.02765	-0.02136
187.2	-0.00103	-0.01359	-0.01177	-0.02685	-0.02069
187.4	-0.00139	-0.01354	-0.01155	-0.02665	-0.02052
187.6	-0.00136	-0.01328	-0.01125	-0.02643	-0.0202
187.8	-0.00181	-0.01328	-0.01107	-0.02593	-0.02014
188	-0.00178	-0.01317	-0.01091	-0.02604	-0.02061
188.2	-0.00169	-0.0133	-0.01095	-0.02597	-0.02082
188.4	-0.00122	-0.01296	-0.01105	-0.02604	-0.02071
188.6	-0.0009	-0.01302	-0.01145	-0.02569	-0.02051
188.8	-0.00055	-0.01324	-0.01109	-0.0257	-0.02043
189	-0.00067	-0.01346	-0.01166	-0.02584	-0.01999
189.2	-0.0007	-0.01325	-0.01163	-0.02563	-0.01993
189.4	-0.00066	-0.01262	-0.01176	-0.02559	-0.01993
189.6	-0.00063	-0.01302	-0.01196	-0.0255	-0.02001
189.8	-0.00044	-0.0127	-0.01156	-0.02568	-0.01964
190	-0.00112	-0.01309	-0.01238	-0.02624	-0.02006
190.2	-0.00167	-0.01304	-0.01284	-0.02641	-0.02057
190.4	-0.00164	-0.01346	-0.01345	-0.02646	-0.02106
190.6	-0.00191	-0.01328	-0.0132	-0.02631	-0.0207
190.8	-0.00195	-0.01372	-0.01376	-0.02669	-0.02092
191	-0.00212	-0.0138	-0.0137	-0.02704	-0.02076
191.2	-0.00224	-0.0139	-0.0134	-0.02733	-0.02057
191.4	-0.00237	-0.01481	-0.01379	-0.02772	-0.02042
191.6	-0.00241	-0.01538	-0.01411	-0.02798	-0.02049
191.8	-0.00297	-0.01607	-0.01453	-0.02872	-0.02108
192	-0.00257	-0.01581	-0.01431	-0.02933	-0.02106
192.2	-0.00266	-0.01585	-0.01432	-0.02956	-0.02126
192.4	-0.00245	-0.01629	-0.01444	-0.02972	-0.0209
192.6	-0.00232	-0.01614	-0.01436	-0.02946	-0.02049
192.8	-0.00198	-0.01592	-0.01387	-0.0294	-0.02044
193	-0.00186	-0.01546	-0.01388	-0.02902	-0.02038
193.2	-0.00216	-0.01582	-0.01401	-0.02918	-0.02087
193.4	-0.00231	-0.01581	-0.01393	-0.02936	-0.02094
193.6	-0.00216	-0.01569	-0.01343	-0.02909	-0.02017
193.8	-0.00204	-0.01471	-0.01273	-0.02884	-0.01968
194	-0.00218	-0.01433	-0.0126	-0.02844	-0.01935
194.2	-0.00211	-0.01392	-0.01245	-0.02841	-0.01922
194.4	-0.00233	-0.01394	-0.01217	-0.02828	-0.01926
194.6	-0.00292	-0.01381	-0.01204	-0.02768	-0.01907
194.8	-0.00362	-0.01367	-0.0125	-0.0278	-0.01905
195	-0.00387	-0.0135	-0.01233	-0.02767	-0.01886
195.2	-0.00364	-0.0133	-0.0121	-0.0271	-0.01824
195.4	-0.00357	-0.01355	-0.01252	-0.02693	-0.01812
195.6	-0.00382	-0.01364	-0.01275	-0.02692	-0.01842
195.8	-0.00431	-0.0137	-0.01248	-0.02717	-0.01875
196	-0.00404	-0.01368	-0.01222	-0.02732	-0.01854
196.2	-0.00401	-0.01436	-0.01223	-0.02739	-0.01861
196.4	-0.00329	-0.01475	-0.01185	-0.02744	-0.01836
196.6	-0.00296	-0.01413	-0.01125	-0.02703	-0.01838
196.8	-0.00247	-0.01393	-0.01121	-0.02688	-0.01881
197	-0.00282	-0.01441	-0.01128	-0.02691	-0.019
197.2	-0.00303	-0.01548	-0.01191	-0.02757	-0.01945
197.4	-0.00271	-0.01565	-0.01201	-0.02762	-0.01975
197.6	-0.00238	-0.01555	-0.01193	-0.02782	-0.01991
197.8	-0.00227	-0.01513	-0.01196	-0.02789	-0.02005
198	-0.0023	-0.0151	-0.01189	-0.02785	-0.02034
198.2	-0.0024	-0.01534	-0.01196	-0.02773	-0.02088
198.4	-0.00257	-0.01559	-0.01211	-0.02763	-0.02143
198.6	-0.00292	-0.01552	-0.01212	-0.0271	-0.02149
198.8	-0.00318	-0.01514	-0.01263	-0.02718	-0.0215
199	-0.0032	-0.015	-0.01271	-0.0273	-0.02164
199.2	-0.00311	-0.01466	-0.01274	-0.02662	-0.02156
199.4	-0.00342	-0.015	-0.01317	-0.02666	-0.02175
199.6	-0.00375	-0.01521	-0.01306	-0.02695	-0.02194
199.8	-0.00379	-0.01509	-0.01235	-0.02698	-0.02185
200	-0.0032	-0.01463	-0.01234	-0.02675	-0.02126
200.2	-0.00307	-0.0143	-0.01194	-0.02647	-0.02092
200.4	-0.00302	-0.01389	-0.01184	-0.02653	-0.02057
200.6	-0.00377	-0.01355	-0.01211	-0.0265	-0.02054
200.8	-0.00403	-0.01373	-0.01265	-0.02691	-0.02046
201	-0.00446	-0.01449	-0.01325	-0.02768	-0.02045
201.2	-0.00424	-0.01482	-0.01357	-0.02852	-0.02049
201.4	-0.00387	-0.01448	-0.01376	-0.02822	-0.02045
201.6	-0.00398	-0.01473	-0.01392	-0.0283	-0.02047
201.8	-0.00379	-0.01439	-0.01345	-0.02754	-0.01984
202	-0.00391	-0.0147	-0.0133	-0.02758	-0.02035
202.2	-0.00401	-0.01491	-0.01327	-0.02752	-0.02027
202.4	-0.00437	-0.01508	-0.01339	-0.02819	-0.02056
202.6	-0.00451	-0.01483	-0.01339	-0.02834	-0.02062
202.8	-0.00409	-0.01455	-0.01325	-0.0281	-0.02024
203	-0.00433	-0.01478	-0.01279	-0.02807	-0.02019
203.2	-0.0045	-0.01491	-0.01271	-0.02737	-0.02051
203.4	-0.0044	-0.01502	-0.01223	-0.02733	-0.02031
203.6	-0.00401	-0.01478	-0.01175	-0.02682	-0.02066
203.8	-0.00439	-0.01477	-0.01154	-0.02677	-0.02091
204	-0.00453	-0.01461	-0.01133	-0.02665	-0.02091
204.2	-0.00484	-0.0146	-0.01091	-0.02677	-0.02125
204.4	-0.00525	-0.01488	-0.0113	-0.02737	-0.02129
204.6	-0.00558	-0.01553	-0.01179	-0.02798	-0.02203
204.8	-0.0053	-0.01553	-0.01209	-0.02849	-0.02235
205	-0.0049	-0.01556	-0.01214	-0.02871	-0.02229
205.2	-0.0051	-0.01582	-0.01227	-0.02914	-0.02231
205.4	-0.00471	-0.0156	-0.01251	-0.02854	-0.02213
205.6	-0.0052	-0.0162	-0.01265	-0.02885	-0.0225
205.8	-0.00506	-0.01587	-0.01225	-0.02848	-0.02201
206	-0.00503	-0.01638	-0.01223	-0.02898	-0.02231
206.2	-0.00516	-0.01602	-0.01232	-0.02943	-0.02195
206.4	-0.00553	-0.01605	-0.01253	-0.03029	-0.02187
206.6	-0.00523	-0.01578	-0.01292	-0.02995	-0.02135
206.8	-0.00521	-0.01602	-0.01263	-0.02976	-0.0213
207	-0.00548	-0.01624	-0.01307	-0.03005	-0.02129
207.2	-0.00513	-0.0161	-0.01349	-0.03017	-0.02125
207.4	-0.00531	-0.01602	-0.01324	-0.03	-0.02082
207.6	-0.00587	-0.01629	-0.01361	-0.02999	-0.0212
207.8	-0.00699	-0.01685	-0.01416	-0.03061	-0.02176
208	-0.00647	-0.0165	-0.01375	-0.03006	-0.02118
208.2	-0.00635	-0.01664	-0.01387	-0.02957	-0.02172
208.4	-0.00638	-0.0168	-0.01438	-0.02991	-0.02195
208.6	-0.00674	-0.01741	-0.01456	-0.02982	-0.02288
208.8	-0.00679	-0.01758	-0.01487	-0.02957	-0.02321
209	-0.00674	-0.01767	-0.01457	-0.029	-0.02281
209.2	-0.00703	-0.01804	-0.01437	-0.02916	-0.02279
209.4	-0.00735	-0.01784	-0.01402	-0.02857	-0.02272
209.6	-0.00772	-0.01833	-0.01385	-0.02842	-0.02314
209.8	-0.00783	-0.01829	-0.01387	-0.02816	-0.02296
210	-0.00822	-0.01809	-0.01383	-0.02814	-0.02278
210.2	-0.0082	-0.01834	-0.01417	-0.02829	-0.02271
210.4	-0.00824	-0.01824	-0.01457	-0.02869	-0.02246
210.6	-0.00809	-0.01802	-0.01438	-0.02861	-0.022
210.8	-0.00841	-0.01827	-0.01472	-0.02926	-0.02215
211	-0.00878	-0.01867	-0.01542	-0.02992	-0.022
211.2	-0.00903	-0.01861	-0.01608	-0.03003	-0.02218
211.4	-0.00958	-0.01871	-0.01636	-0.03003	-0.02217
211.6	-0.0097	-0.01848	-0.01662	-0.03006	-0.02224
211.8	-0.00907	-0.0185	-0.0164	-0.02957	-0.02209
212	-0.00816	-0.01802	-0.01582	-0.02883	-0.02151
212.2	-0.00796	-0.01829	-0.01589	-0.0285	-0.02184
212.4	-0.00733	-0.01761	-0.01541	-0.02765	-0.02116
212.6	-0.00722	-0.01766	-0.01487	-0.02688	-0.02079
212.8	-0.0068	-0.01785	-0.01441	-0.02612	-0.02068
213	-0.0063	-0.01767	-0.01372	-0.02566	-0.02015
213.2	-0.00632	-0.01725	-0.0133	-0.02547	-0.02025
213.4	-0.00631	-0.01697	-0.01322	-0.02565	-0.02034
213.6	-0.00646	-0.0172	-0.01311	-0.02582	-0.0209
213.8	-0.00621	-0.01683	-0.01295	-0.02568	-0.02064
214	-0.00616	-0.01647	-0.01281	-0.02577	-0.02046
214.2	-0.00576	-0.01689	-0.01255	-0.02606	-0.02049
214.4	-0.00587	-0.01642	-0.01231	-0.02661	-0.01978
214.6	-0.00687	-0.01709	-0.01254	-0.02717	-0.0201
214.8	-0.00767	-0.0181	-0.01349	-0.02778	-0.0207
215	-0.00845	-0.01877	-0.01401	-0.02808	-0.02142
215.2	-0.00912	-0.01867	-0.01447	-0.02833	-0.02189
215.4	-0.00928	-0.01912	-0.01475	-0.02867	-0.02218
215.6	-0.00984	-0.01948	-0.0151	-0.02909	-0.02221
215.8	-0.01011	-0.02009	-0.01585	-0.02931	-0.02246
216	-0.01071	-0.02036	-0.0165	-0.02948	-0.02282
216.2	-0.01106	-0.02067	-0.01685	-0.02918	-0.02249
216.4	-0.01142	-0.02055	-0.0169	-0.02906	-0.02239
216.6	-0.01151	-0.02088	-0.01675	-0.02931	-0.02232
216.8	-0.01112	-0.0207	-0.0165	-0.02921	-0.02236
217	-0.01065	-0.01996	-0.01666	-0.02933	-0.02214
217.2	-0.01028	-0.01944	-0.01604	-0.02894	-0.02201
217.4	-0.0098	-0.01927	-0.0159	-0.02964	-0.02172
217.6	-0.00942	-0.01878	-0.01547	-0.02917	-0.02157
217.8	-0.00855	-0.01843	-0.01505	-0.0285	-0.02112
218	-0.00842	-0.01794	-0.01485	-0.0288	-0.02098
218.2	-0.00783	-0.01779	-0.01442	-0.02866	-0.0203
218.4	-0.00788	-0.01809	-0.01455	-0.02902	-0.02025
218.6	-0.00767	-0.01854	-0.01472	-0.02888	-0.02075
218.8	-0.00792	-0.01849	-0.01463	-0.02904	-0.02096
219	-0.00816	-0.0186	-0.01483	-0.02946	-0.02165
219.2	-0.00858	-0.01906	-0.01506	-0.02951	-0.02219
219.4	-0.00821	-0.01928	-0.015	-0.02932	-0.02191
219.6	-0.00819	-0.01911	-0.01498	-0.0291	-0.02189
219.8	-0.00836	-0.01933	-0.01534	-0.02938	-0.02264
220	-0.00878	-0.01961	-0.01534	-0.02946	-0.02289
220.2	-0.00942	-0.01986	-0.01545	-0.03009	-0.02277
220.4	-0.00953	-0.01983	-0.0155	-0.03061	-0.02272
220.6	-0.00902	-0.01943	-0.01495	-0.0302	-0.022
220.8	-0.00861	-0.01847	-0.01438	-0.02987	-0.02145
221	-0.00813	-0.01807	-0.01383	-0.02924	-0.02081
221.2	-0.00814	-0.0182	-0.01366	-0.02906	-0.02061
221.4	-0.00842	-0.01846	-0.01409	-0.02933	-0.02087
221.6	-0.00868	-0.01823	-0.0141	-0.02908	-0.02077
221.8	-0.00877	-0.01847	-0.01397	-0.02904	-0.02066
222	-0.00877	-0.01817	-0.01384	-0.0294	-0.02054
222.2	-0.00865	-0.01859	-0.01373	-0.02936	-0.02035
222.4	-0.00897	-0.01922	-0.01422	-0.02973	-0.0206
222.6	-0.00907	-0.01947	-0.01418	-0.02978	-0.02089
222.8	-0.01005	-0.01984	-0.0143	-0.03024	-0.02122
223	-0.00995	-0.01995	-0.01442	-0.03034	-0.02151
223.2	-0.01004	-0.02018	-0.01476	-0.03004	-0.02168
223.4	-0.00949	-0.01961	-0.01487	-0.03024	-0.02137
223.6	-0.00998	-0.01962	-0.01523	-0.03035	-0.02233
223.8	-0.01036	-0.01984	-0.01538	-0.03103	-0.02285
224	-0.01128	-0.02036	-0.0159	-0.03158	-0.02316
224.2	-0.01205	-0.02078	-0.01614	-0.0323	-0.02338
224.4	-0.01203	-0.02047	-0.016	-0.03202	-0.02314
224.6	-0.0124	-0.02045	-0.01609	-0.03192	-0.02295
224.8	-0.01237	-0.02031	-0.01578	-0.0315	-0.02278
225	-0.01217	-0.01994	-0.01547	-0.03085	-0.02236
225.2	-0.01263	-0.02038	-0.01575	-0.03125	-0.0227
225.4	-0.01286	-0.02021	-0.01521	-0.03108	-0.02282
225.6	-0.0122	-0.01899	-0.01432	-0.03046	-0.02165
225.8	-0.01114	-0.01866	-0.0135	-0.02967	-0.02102
226	-0.01056	-0.01796	-0.01285	-0.02951	-0.02078
226.2	-0.01023	-0.01839	-0.01279	-0.02963	-0.02087
226.4	-0.01012	-0.01865	-0.01318	-0.02969	-0.02087
226.6	-0.01001	-0.01881	-0.01279	-0.02967	-0.02087
226.8	-0.01004	-0.01905	-0.01299	-0.02979	-0.0208
227	-0.00942	-0.01817	-0.01315	-0.02968	-0.02042
227.2	-0.00997	-0.01869	-0.01403	-0.0306	-0.02123
227.4	-0.01026	-0.01887	-0.01425	-0.03091	-0.0216
227.6	-0.01133	-0.01956	-0.01476	-0.03117	-0.02216
227.8	-0.01146	-0.02025	-0.01494	-0.03156	-0.02246
228	-0.01229	-0.02069	-0.01556	-0.03181	-0.02281
228.2	-0.01266	-0.02166	-0.01575	-0.0323	-0.02297
228.4	-0.01272	-0.02163	-0.01598	-0.03203	-0.02235
228.6	-0.01293	-0.02251	-0.01619	-0.03183	-0.02193
228.8	-0.0128	-0.02281	-0.01618	-0.03128	-0.02197
229	-0.01291	-0.0227	-0.01625	-0.03141	-0.02209
229.2	-0.01338	-0.02301	-0.01634	-0.03158	-0.02228
229.4	-0.013	-0.02233	-0.01574	-0.0307	-0.02162
229.6	-0.01224	-0.02161	-0.01522	-0.02976	-0.0208
229.8	-0.01162	-0.02171	-0.01464	-0.02957	-0.02041
230	-0.0117	-0.02125	-0.01428	-0.02945	-0.0204
230.2	-0.0115	-0.0216	-0.01473	-0.02946	-0.02071
230.4	-0.01146	-0.02136	-0.01465	-0.02924	-0.02035
230.6	-0.01172	-0.02113	-0.01471	-0.02924	-0.02047
230.8	-0.01216	-0.02112	-0.0151	-0.02939	-0.02053
231	-0.01164	-0.0203	-0.01519	-0.02957	-0.02011
231.2	-0.01265	-0.02094	-0.01562	-0.03	-0.02123
231.4	-0.01295	-0.0209	-0.01541	-0.02934	-0.02138
231.6	-0.01322	-0.02087	-0.01554	-0.02942	-0.02183
231.8	-0.01315	-0.02059	-0.0157	-0.0297	-0.0225
232	-0.01315	-0.02049	-0.01581	-0.02967	-0.02234
232.2	-0.01312	-0.02132	-0.01593	-0.03006	-0.02238
232.4	-0.01305	-0.0211	-0.01607	-0.02975	-0.02222
232.6	-0.01315	-0.02191	-0.01618	-0.02976	-0.0225
232.8	-0.0131	-0.02183	-0.01642	-0.0299	-0.02295
233	-0.01327	-0.02179	-0.01622	-0.03025	-0.02333
233.2	-0.01354	-0.02209	-0.01591	-0.0298	-0.0233
233.4	-0.01306	-0.02233	-0.01513	-0.02942	-0.02292
233.6	-0.01302	-0.02267	-0.01514	-0.02996	-0.02311
233.8	-0.01276	-0.02293	-0.01496	-0.03033	-0.02333
234	-0.01325	-0.02272	-0.01501	-0.03043	-0.0238
234.2	-0.01336	-0.02299	-0.01604	-0.0313	-0.02426
234.4	-0.01384	-0.02296	-0.01632	-0.03184	-0.02447
234.6	-0.0141	-0.0228	-0.01664	-0.03174	-0.02436
234.8	-0.01424	-0.02273	-0.01677	-0.03151	-0.02379
235	-0.01378	-0.02246	-0.01689	-0.03178	-0.02342
235.2	-0.01444	-0.02275	-0.01718	-0.0314	-0.02409
235.4	-0.01478	-0.02266	-0.01722	-0.03118	-0.02407
235.6	-0.01472	-0.02228	-0.01703	-0.0311	-0.02359
235.8	-0.01479	-0.02225	-0.01716	-0.03116	-0.02353
236	-0.01459	-0.02234	-0.01669	-0.03075	-0.02254
236.2	-0.01491	-0.02203	-0.01649	-0.03073	-0.02223
236.4	-0.01468	-0.02187	-0.01633	-0.03063	-0.02201
236.6	-0.01471	-0.02183	-0.016	-0.03075	-0.0219
236.8	-0.01421	-0.02134	-0.01558	-0.03024	-0.02147
237	-0.01448	-0.02148	-0.01524	-0.03034	-0.02177
237.2	-0.01424	-0.02202	-0.01504	-0.03012	-0.02194
237.4	-0.01459	-0.02273	-0.01536	-0.03063	-0.02264
237.6	-0.01469	-0.0229	-0.01537	-0.03062	-0.02327
237.8	-0.01473	-0.02295	-0.01516	-0.03053	-0.02395
238	-0.01452	-0.02255	-0.01481	-0.03009	-0.02386
238.2	-0.01411	-0.0226	-0.01557	-0.03046	-0.02423
238.4	-0.01397	-0.02274	-0.01551	-0.03011	-0.0238
238.6	-0.01386	-0.02281	-0.01517	-0.0296	-0.02311
238.8	-0.01352	-0.02307	-0.01483	-0.02937	-0.02281
239	-0.01311	-0.02282	-0.01499	-0.02953	-0.02258
239.2	-0.01331	-0.02285	-0.01526	-0.02919	-0.0228
239.4	-0.01377	-0.0233	-0.01526	-0.02949	-0.02254
239.6	-0.0136	-0.02384	-0.01502	-0.03	-0.02238
239.8	-0.01332	-0.02365	-0.01495	-0.02977	-0.02207
240	-0.01355	-0.02358	-0.01484	-0.02978	-0.02168
240.2	-0.01374	-0.02293	-0.01447	-0.02969	-0.02107
240.4	-0.01344	-0.02293	-0.0142	-0.02983	-0.02104
240.6	-0.01423	-0.02295	-0.01446	-0.03026	-0.02117
240.8	-0.014	-0.02257	-0.01409	-0.03007	-0.02059
241	-0.01466	-0.02271	-0.0143	-0.03081	-0.02107
241.2	-0.01515	-0.02286	-0.0147	-0.03083	-0.02137
241.4	-0.01563	-0.02327	-0.01497	-0.03074	-0.02174
241.6	-0.01568	-0.02317	-0.01517	-0.03048	-0.02193
241.8	-0.01501	-0.02297	-0.01475	-0.03052	-0.02169
242	-0.01479	-0.02246	-0.01464	-0.02952	-0.02126
242.2	-0.01505	-0.02278	-0.01499	-0.02966	-0.02158
242.4	-0.01528	-0.02255	-0.01503	-0.02971	-0.02112
242.6	-0.01515	-0.02225	-0.01483	-0.02987	-0.0212
242.8	-0.01489	-0.02232	-0.01511	-0.02976	-0.02128
243	-0.01462	-0.02161	-0.01545	-0.02983	-0.02141
243.2	-0.01476	-0.02194	-0.01585	-0.02988	-0.02197
243.4	-0.01483	-0.02229	-0.01577	-0.03004	-0.02203
243.6	-0.0145	-0.02215	-0.01585	-0.02999	-0.02231
243.8	-0.0141	-0.02178	-0.01583	-0.02956	-0.02211
244	-0.01475	-0.02197	-0.01596	-0.0298	-0.02229
244.2	-0.01446	-0.02181	-0.01576	-0.02975	-0.02176
244.4	-0.01444	-0.02208	-0.01583	-0.03014	-0.02199
244.6	-0.01447	-0.02183	-0.0158	-0.03044	-0.02186
244.8	-0.01399	-0.02149	-0.01538	-0.03011	-0.02149
245	-0.01441	-0.02172	-0.01578	-0.03044	-0.02145
245.2	-0.01476	-0.02184	-0.01593	-0.03044	-0.02159
245.4	-0.01453	-0.02203	-0.01603	-0.03037	-0.02169
245.6	-0.01506	-0.02204	-0.0161	-0.03038	-0.02175
245.8	-0.01414	-0.0215	-0.01499	-0.02978	-0.02105
246	-0.01463	-0.02112	-0.01496	-0.02879	-0.02093
246.2	-0.01496	-0.02154	-0.01504	-0.02901	-0.02087
246.4	-0.01529	-0.02139	-0.01529	-0.02896	-0.02102
246.6	-0.01543	-0.02154	-0.01543	-0.02904	-0.02107
246.8	-0.0156	-0.0217	-0.01569	-0.02905	-0.02126
247	-0.01608	-0.02138	-0.01588	-0.02901	-0.02174
247.2	-0.01644	-0.02161	-0.01585	-0.02902	-0.02179
247.4	-0.01693	-0.02192	-0.01571	-0.0296	-0.02206
247.6	-0.01702	-0.02258	-0.01615	-0.02992	-0.0225
247.8	-0.01687	-0.02323	-0.01597	-0.02988	-0.02202
248	-0.01715	-0.02361	-0.01642	-0.03034	-0.02218
248.2	-0.017	-0.02444	-0.01677	-0.03101	-0.02252
248.4	-0.01711	-0.02523	-0.01726	-0.03166	-0.02301
248.6	-0.01745	-0.02535	-0.01756	-0.03221	-0.02356
248.8	-0.01769	-0.02546	-0.01784	-0.03231	-0.02368
249	-0.01819	-0.02561	-0.01795	-0.03307	-0.02431
249.2	-0.01799	-0.02531	-0.01762	-0.03311	-0.02457
249.4	-0.01785	-0.02512	-0.01762	-0.03321	-0.02443
249.6	-0.01798	-0.02549	-0.01737	-0.03353	-0.02434
249.8	-0.01758	-0.0253	-0.01712	-0.03329	-0.02415
250	-0.01753	-0.0251	-0.01676	-0.03261	-0.02401
250.2	-0.01705	-0.02542	-0.01632	-0.03253	-0.02382
250.4	-0.01737	-0.02522	-0.0165	-0.03266	-0.02403
250.6	-0.0171	-0.02494	-0.01658	-0.03254	-0.0236
250.8	-0.0171	-0.02452	-0.01679	-0.03232	-0.02347
251	-0.0172	-0.02432	-0.01655	-0.03194	-0.023
251.2	-0.01627	-0.02424	-0.01554	-0.03169	-0.0221
251.4	-0.01595	-0.02434	-0.01546	-0.0317	-0.02187
251.6	-0.01546	-0.02441	-0.01526	-0.03125	-0.02159
251.8	-0.01508	-0.02426	-0.01525	-0.03103	-0.02121
252	-0.01486	-0.02455	-0.01567	-0.0314	-0.02148
252.2	-0.01519	-0.02481	-0.01616	-0.03147	-0.02152
252.4	-0.0154	-0.02499	-0.01653	-0.03166	-0.02159
252.6	-0.01586	-0.02477	-0.01672	-0.03174	-0.02181
252.8	-0.01597	-0.0244	-0.01668	-0.03109	-0.02177
253	-0.01692	-0.02447	-0.01682	-0.03154	-0.02232
253.2	-0.01692	-0.0246	-0.01686	-0.03167	-0.02232
253.4	-0.0171	-0.02514	-0.01664	-0.03182	-0.02218
253.6	-0.017	-0.02536	-0.01667	-0.032	-0.02238
253.8	-0.01722	-0.02507	-0.01652	-0.03176	-0.0226
254	-0.01761	-0.02557	-0.0163	-0.03198	-0.0229
254.2	-0.01809	-0.02576	-0.01668	-0.03245	-0.02321
254.4	-0.01872	-0.0256	-0.01756	-0.03262	-0.02336
254.6	-0.01867	-0.02528	-0.01771	-0.03217	-0.02307
254.8	-0.01871	-0.02472	-0.01756	-0.03195	-0.02291
255	-0.01782	-0.02482	-0.01689	-0.03186	-0.0227
255.2	-0.01706	-0.02439	-0.01645	-0.03162	-0.02246
255.4	-0.01699	-0.02453	-0.01672	-0.03192	-0.02279
255.6	-0.01706	-0.02471	-0.01666	-0.03211	-0.02312
255.8	-0.01668	-0.02447	-0.01627	-0.03169	-0.02275
256	-0.01664	-0.02462	-0.01639	-0.03196	-0.02259
256.2	-0.01713	-0.02463	-0.01658	-0.03195	-0.02277
256.4	-0.01724	-0.02474	-0.0166	-0.03219	-0.02341
256.6	-0.01755	-0.02489	-0.01658	-0.03183	-0.02352
256.8	-0.01787	-0.02495	-0.01646	-0.03206	-0.02353
257	-0.01791	-0.02526	-0.01623	-0.03256	-0.02344
257.2	-0.0175	-0.02528	-0.01583	-0.03242	-0.02296
257.4	-0.01741	-0.02516	-0.01522	-0.03232	-0.02232
257.6	-0.01773	-0.0252	-0.01579	-0.03242	-0.02236
257.8	-0.01868	-0.02579	-0.01591	-0.03246	-0.02249
258	-0.01935	-0.02621	-0.01605	-0.03277	-0.02225
258.2	-0.01971	-0.02584	-0.01631	-0.03236	-0.0223
258.4	-0.01942	-0.02558	-0.01615	-0.03194	-0.02174
258.6	-0.01938	-0.02531	-0.01583	-0.03155	-0.0212
258.8	-0.01914	-0.02521	-0.01579	-0.03144	-0.02115
259	-0.01832	-0.0252	-0.01583	-0.03129	-0.02082
259.2	-0.0188	-0.02494	-0.01618	-0.0313	-0.02111
259.4	-0.01904	-0.02557	-0.01645	-0.03133	-0.02129
259.6	-0.01894	-0.02519	-0.01627	-0.03138	-0.02143
259.8	-0.01892	-0.0251	-0.01644	-0.03112	-0.02141
260	-0.01895	-0.02484	-0.01694	-0.03109	-0.02178
260.2	-0.01944	-0.025	-0.01701	-0.031	-0.02233
260.4	-0.01921	-0.02484	-0.01691	-0.03104	-0.02232
260.6	-0.01933	-0.02505	-0.01705	-0.03103	-0.02201
260.8	-0.01923	-0.02543	-0.01707	-0.03152	-0.02196
261	-0.01884	-0.02541	-0.01681	-0.03151	-0.0216
261.2	-0.01893	-0.02535	-0.01639	-0.03141	-0.02112
261.4	-0.01905	-0.02505	-0.01597	-0.03115	-0.02066
261.6	-0.01902	-0.02536	-0.01622	-0.03107	-0.02069
261.8	-0.01918	-0.02568	-0.0161	-0.03131	-0.02062
262	-0.01919	-0.02548	-0.01593	-0.03147	-0.02036
262.2	-0.01933	-0.02524	-0.01539	-0.03129	-0.02059
262.4	-0.01928	-0.02545	-0.01537	-0.03175	-0.02048
262.6	-0.01932	-0.02563	-0.01565	-0.03171	-0.02032
262.8	-0.01931	-0.02611	-0.01589	-0.03185	-0.02052
263	-0.01923	-0.02621	-0.01573	-0.03163	-0.02058
263.2	-0.01938	-0.02629	-0.01598	-0.03184	-0.02137
263.4	-0.01949	-0.02639	-0.01604	-0.03169	-0.02154
263.6	-0.01959	-0.02613	-0.01661	-0.03212	-0.02244
263.8	-0.01989	-0.02616	-0.01728	-0.03198	-0.02287
264	-0.01973	-0.02605	-0.01757	-0.03224	-0.02333
264.2	-0.02009	-0.02624	-0.01785	-0.03224	-0.02308
264.4	-0.02021	-0.02646	-0.01826	-0.03219	-0.02313
264.6	-0.02037	-0.02695	-0.01905	-0.03237	-0.02328
264.8	-0.02055	-0.02723	-0.01929	-0.03242	-0.02363
265	-0.02016	-0.02643	-0.01897	-0.03201	-0.02279
265.2	-0.02012	-0.02608	-0.01879	-0.03136	-0.02258
265.4	-0.02038	-0.0259	-0.01872	-0.03118	-0.02243
265.6	-0.02059	-0.02622	-0.01903	-0.03126	-0.02298
265.8	-0.02113	-0.0268	-0.01891	-0.03172	-0.02312
266	-0.02153	-0.02689	-0.01841	-0.03185	-0.023
266.2	-0.02183	-0.02727	-0.01784	-0.03177	-0.02292
266.4	-0.02164	-0.02742	-0.01769	-0.03203	-0.02262
266.6	-0.02161	-0.02755	-0.01729	-0.03179	-0.02224
266.8	-0.02236	-0.02788	-0.0168	-0.03209	-0.02252
267	-0.02244	-0.02758	-0.0165	-0.0322	-0.02263
267.2	-0.02302	-0.0277	-0.01676	-0.03297	-0.02353
267.4	-0.02396	-0.02799	-0.01677	-0.0333	-0.02439
267.6	-0.0241	-0.02815	-0.01675	-0.03404	-0.02502
267.8	-0.02367	-0.02747	-0.01619	-0.03389	-0.0246
268	-0.02327	-0.02752	-0.01617	-0.03421	-0.02437
268.2	-0.02315	-0.02739	-0.01617	-0.0338	-0.02394
268.4	-0.02326	-0.02809	-0.01685	-0.03455	-0.02473
268.6	-0.02248	-0.02779	-0.0171	-0.03428	-0.02453
268.8	-0.02195	-0.02746	-0.01723	-0.03385	-0.02412
269	-0.02165	-0.02754	-0.01725	-0.03361	-0.02379
269.2	-0.02141	-0.0276	-0.01775	-0.03336	-0.02411
269.4	-0.02161	-0.02828	-0.01821	-0.03344	-0.0242
269.6	-0.02167	-0.02844	-0.01845	-0.03302	-0.02417
269.8	-0.02161	-0.02864	-0.01833	-0.03368	-0.02416
270	-0.02146	-0.02849	-0.01809	-0.0339	-0.02396
270.2	-0.02119	-0.02825	-0.01798	-0.03414	-0.02353
270.4	-0.02092	-0.02762	-0.01787	-0.03455	-0.02321
270.6	-0.02147	-0.02789	-0.01814	-0.03514	-0.02338
270.8	-0.02232	-0.02757	-0.01815	-0.03602	-0.02361
271	-0.02236	-0.0274	-0.01819	-0.03654	-0.02369
271.2	-0.02309	-0.02782	-0.01819	-0.03739	-0.02448
271.4	-0.02322	-0.02801	-0.01788	-0.03766	-0.02506
271.6	-0.02266	-0.02727	-0.01741	-0.03713	-0.02462
271.8	-0.02228	-0.027	-0.01732	-0.03664	-0.0243
272	-0.02193	-0.02703	-0.01761	-0.03629	-0.02417
272.2	-0.02178	-0.0272	-0.01784	-0.03572	-0.02436
272.4	-0.0218	-0.02748	-0.01829	-0.03595	-0.02458
272.6	-0.02126	-0.02709	-0.0183	-0.03499	-0.02407
272.8	-0.02137	-0.02754	-0.01896	-0.03469	-0.0238
273	-0.02169	-0.02786	-0.01906	-0.03443	-0.02391
273.2	-0.02166	-0.02772	-0.01973	-0.03406	-0.02416
273.4	-0.02221	-0.02819	-0.01989	-0.03384	-0.02481
273.6	-0.0225	-0.02806	-0.01963	-0.03357	-0.0252
273.8	-0.02204	-0.02753	-0.01893	-0.03323	-0.02505
274	-0.02201	-0.02734	-0.0184	-0.03275	-0.02454
274.2	-0.02185	-0.02684	-0.01789	-0.03298	-0.02394
274.4	-0.02166	-0.02655	-0.01731	-0.03312	-0.0236
274.6	-0.02192	-0.02653	-0.01727	-0.03347	-0.0237
274.8	-0.02212	-0.02637	-0.01716	-0.03379	-0.02345
275	-0.0222	-0.02699	-0.01718	-0.03426	-0.02342
275.2	-0.02205	-0.02755	-0.01696	-0.03431	-0.02365
275.4	-0.02196	-0.02764	-0.01681	-0.03418	-0.02377
275.6	-0.02139	-0.02754	-0.01708	-0.03391	-0.02332
275.8	-0.02175	-0.0278	-0.01714	-0.03378	-0.02312
276	-0.02184	-0.0278	-0.01717	-0.03332	-0.02315
276.2	-0.02219	-0.02774	-0.01726	-0.0333	-0.02304
276.4	-0.02258	-0.02779	-0.01755	-0.03349	-0.02261
276.6	-0.02267	-0.02791	-0.0177	-0.0335	-0.02269
276.8	-0.02285	-0.0284	-0.01812	-0.03374	-0.02278
277	-0.02271	-0.02849	-0.01786	-0.03404	-0.02273
277.2	-0.0229	-0.02888	-0.01807	-0.03416	-0.02309
277.4	-0.02315	-0.02881	-0.01806	-0.03406	-0.02333
277.6	-0.02308	-0.02883	-0.01831	-0.03391	-0.02317
277.8	-0.02231	-0.02834	-0.01788	-0.03332	-0.02262
278	-0.0226	-0.02834	-0.01791	-0.03387	-0.02274
278.2	-0.02274	-0.02823	-0.01814	-0.0341	-0.02288
278.4	-0.02276	-0.02846	-0.01824	-0.03396	-0.02313
278.6	-0.02274	-0.02825	-0.01847	-0.03364	-0.02321
278.8	-0.02262	-0.02833	-0.01855	-0.034	-0.023
279	-0.02249	-0.02842	-0.01861	-0.03412	-0.02298
279.2	-0.02253	-0.02912	-0.01884	-0.03423	-0.02378
279.4	-0.02262	-0.02897	-0.01841	-0.03439	-0.02371
279.6	-0.02281	-0.02865	-0.01825	-0.03416	-0.02357
279.8	-0.02367	-0.02867	-0.01812	-0.03412	-0.02407
280	-0.02415	-0.02901	-0.01828	-0.03408	-0.0247
280.2	-0.02418	-0.02857	-0.01811	-0.03408	-0.02426
280.4	-0.02425	-0.02852	-0.01791	-0.03397	-0.02416
280.6	-0.02358	-0.02886	-0.01758	-0.03463	-0.0242
280.8	-0.02338	-0.02883	-0.01742	-0.03471	-0.02403
281	-0.02311	-0.02887	-0.01724	-0.03461	-0.02374
281.2	-0.02379	-0.02957	-0.01792	-0.03534	-0.02433
281.4	-0.02329	-0.02919	-0.0182	-0.03545	-0.02451
281.6	-0.02284	-0.02919	-0.01791	-0.03542	-0.02421
281.8	-0.02296	-0.02904	-0.01789	-0.03542	-0.02449
282	-0.02347	-0.02951	-0.01808	-0.03583	-0.0248
282.2	-0.0238	-0.02972	-0.01866	-0.03572	-0.02463
282.4	-0.02393	-0.02923	-0.01868	-0.03551	-0.02443
282.6	-0.02424	-0.02931	-0.01908	-0.03579	-0.02452
282.8	-0.02465	-0.0296	-0.01916	-0.0363	-0.02464
283	-0.02508	-0.03011	-0.01979	-0.0364	-0.02485
283.2	-0.02564	-0.03106	-0.02004	-0.03638	-0.02547
283.4	-0.02539	-0.03063	-0.01955	-0.03608	-0.02528
283.6	-0.02614	-0.03103	-0.02017	-0.03627	-0.02618
283.8	-0.02607	-0.03142	-0.02055	-0.03639	-0.02656
284	-0.02598	-0.03126	-0.02074	-0.036	-0.02627
284.2	-0.02584	-0.03109	-0.02071	-0.03576	-0.02582
284.4	-0.02528	-0.03105	-0.02046	-0.03514	-0.02516
284.6	-0.0246	-0.03091	-0.02052	-0.03512	-0.02452
284.8	-0.02435	-0.0305	-0.02063	-0.03463	-0.02484
285	-0.02399	-0.03046	-0.02056	-0.03396	-0.02454
285.2	-0.02401	-0.03066	-0.02068	-0.03409	-0.0246
285.4	-0.02286	-0.0298	-0.01994	-0.03343	-0.02365
285.6	-0.02296	-0.02994	-0.01949	-0.03314	-0.02318
285.8	-0.02344	-0.03028	-0.01925	-0.03298	-0.02324
286	-0.02335	-0.03037	-0.01891	-0.03338	-0.02275
286.2	-0.02315	-0.0298	-0.01824	-0.03301	-0.02194
286.4	-0.02348	-0.02976	-0.01816	-0.03283	-0.02202
286.6	-0.02348	-0.03005	-0.01771	-0.03317	-0.02207
286.8	-0.02397	-0.02984	-0.01712	-0.03321	-0.02186
287	-0.02445	-0.03018	-0.01765	-0.03342	-0.022
287.2	-0.02422	-0.02977	-0.01736	-0.03327	-0.02219
287.4	-0.02412	-0.02991	-0.01732	-0.03392	-0.0226
287.6	-0.02496	-0.03005	-0.01775	-0.03443	-0.02321
287.8	-0.02498	-0.02937	-0.01773	-0.03444	-0.02273
288	-0.02555	-0.02885	-0.01812	-0.03421	-0.0229
288.2	-0.02549	-0.02854	-0.01799	-0.03382	-0.02299
288.4	-0.02486	-0.0279	-0.01773	-0.03345	-0.0223
288.6	-0.02505	-0.02733	-0.01782	-0.03358	-0.02247
288.8	-0.02483	-0.02717	-0.01776	-0.03335	-0.0227
289	-0.02487	-0.02725	-0.01772	-0.03309	-0.02234
289.2	-0.02503	-0.02757	-0.01791	-0.0334	-0.02245
289.4	-0.025	-0.02771	-0.01795	-0.03341	-0.02218
289.6	-0.02515	-0.02809	-0.01785	-0.03349	-0.02216
289.8	-0.02523	-0.02807	-0.01767	-0.03361	-0.0222
290	-0.02514	-0.02852	-0.01773	-0.03415	-0.02206
290.2	-0.02498	-0.02897	-0.01758	-0.03421	-0.02196
290.4	-0.02544	-0.02941	-0.01816	-0.03439	-0.02227
290.6	-0.02538	-0.02907	-0.01786	-0.03457	-0.02226
290.8	-0.02612	-0.02981	-0.01832	-0.03511	-0.02249
291	-0.02577	-0.02985	-0.01836	-0.03508	-0.02238
291.2	-0.02521	-0.02983	-0.01791	-0.03535	-0.02215
291.4	-0.02526	-0.03031	-0.01819	-0.03577	-0.02224
291.6	-0.02592	-0.03035	-0.01827	-0.03603	-0.02231
291.8	-0.02584	-0.03044	-0.01815	-0.03619	-0.02239
292	-0.02541	-0.03011	-0.01798	-0.0357	-0.02241
292.2	-0.02524	-0.03047	-0.01791	-0.03592	-0.02265
292.4	-0.02544	-0.0308	-0.01791	-0.03609	-0.02254
292.6	-0.02533	-0.03107	-0.01803	-0.03588	-0.02264
292.8	-0.02465	-0.03069	-0.01766	-0.03539	-0.02223
293	-0.02463	-0.03072	-0.01755	-0.03526	-0.02225
293.2	-0.0251	-0.03062	-0.01802	-0.03529	-0.02247
293.4	-0.02528	-0.03012	-0.01829	-0.03477	-0.02255
293.6	-0.02576	-0.03014	-0.01842	-0.03497	-0.02307
293.8	-0.02637	-0.03019	-0.01901	-0.03484	-0.02378
294	-0.02643	-0.03051	-0.01896	-0.03429	-0.02374
294.2	-0.02649	-0.03033	-0.01904	-0.03418	-0.02403
294.4	-0.02674	-0.02971	-0.01928	-0.03397	-0.02406
294.6	-0.02645	-0.02907	-0.0188	-0.03391	-0.02389
294.8	-0.02603	-0.02895	-0.01871	-0.03362	-0.02326
295	-0.0253	-0.02835	-0.01812	-0.03374	-0.0231
295.2	-0.02508	-0.02833	-0.01801	-0.03377	-0.02275
295.4	-0.02497	-0.02861	-0.01856	-0.03433	-0.0229
295.6	-0.02501	-0.02911	-0.01855	-0.03485	-0.02278
295.8	-0.02445	-0.02947	-0.01886	-0.03504	-0.02323
296	-0.02444	-0.02946	-0.01895	-0.03492	-0.02281
296.2	-0.02522	-0.03047	-0.0197	-0.0356	-0.02374
296.4	-0.02539	-0.03066	-0.0199	-0.03635	-0.02392
296.6	-0.02482	-0.03065	-0.01967	-0.03619	-0.02356
296.8	-0.02485	-0.03034	-0.01931	-0.03606	-0.02352
297	-0.02554	-0.03066	-0.01954	-0.03647	-0.02355
297.2	-0.02628	-0.03076	-0.01982	-0.03652	-0.02381
297.4	-0.0267	-0.031	-0.01963	-0.03626	-0.02395
297.6	-0.02741	-0.03164	-0.01964	-0.03671	-0.02431
297.8	-0.02787	-0.03145	-0.01972	-0.03626	-0.02401
298	-0.02783	-0.03198	-0.01946	-0.03593	-0.02362
298.2	-0.0282	-0.03206	-0.01956	-0.03624	-0.02373
298.4	-0.02854	-0.03187	-0.01975	-0.03616	-0.02362
298.6	-0.02859	-0.0318	-0.01931	-0.03622	-0.0234
298.8	-0.02867	-0.03231	-0.01946	-0.03612	-0.02306
299	-0.0291	-0.03269	-0.01973	-0.03679	-0.02363
299.2	-0.02915	-0.03303	-0.01996	-0.03654	-0.0234
299.4	-0.02902	-0.03321	-0.02039	-0.03683	-0.02351
299.6	-0.0289	-0.03319	-0.02022	-0.03663	-0.02347
299.8	-0.02851	-0.03308	-0.02002	-0.03613	-0.02348
300	-0.02851	-0.03338	-0.01988	-0.0363	-0.02325
300.2	-0.02854	-0.03344	-0.02012	-0.0363	-0.02375
300.4	-0.02794	-0.03293	-0.01969	-0.03632	-0.02343
300.6	-0.02737	-0.03258	-0.01921	-0.03546	-0.02277
300.8	-0.02732	-0.03211	-0.01877	-0.03489	-0.02254
301	-0.02736	-0.03227	-0.01851	-0.035	-0.02237
301.2	-0.02697	-0.03195	-0.01837	-0.03446	-0.02255
301.4	-0.02677	-0.03155	-0.0181	-0.03441	-0.02244
301.6	-0.02678	-0.03147	-0.01802	-0.03406	-0.02185
301.8	-0.02706	-0.03087	-0.01785	-0.03383	-0.02141
302	-0.02727	-0.03103	-0.0182	-0.03408	-0.02209
302.2	-0.02804	-0.03081	-0.01864	-0.0345	-0.02247
302.4	-0.02879	-0.03113	-0.0189	-0.03515	-0.02279
302.6	-0.029	-0.03114	-0.01916	-0.03563	-0.02293
302.8	-0.02948	-0.03165	-0.01955	-0.03632	-0.02339
303	-0.02993	-0.03174	-0.01986	-0.03708	-0.02384
303.2	-0.0301	-0.03194	-0.02007	-0.03731	-0.024
303.4	-0.02993	-0.03177	-0.02031	-0.03751	-0.02385
303.6	-0.02954	-0.03182	-0.02031	-0.03758	-0.02401
303.8	-0.02898	-0.03183	-0.01994	-0.03776	-0.02379
304	-0.0284	-0.03235	-0.01974	-0.03795	-0.0236
304.2	-0.02791	-0.0321	-0.01968	-0.0375	-0.02323
304.4	-0.0275	-0.03213	-0.01957	-0.03759	-0.02317
304.6	-0.0272	-0.03254	-0.01932	-0.03722	-0.02269
304.8	-0.02678	-0.03261	-0.01899	-0.03696	-0.02242
305	-0.0266	-0.03289	-0.01898	-0.03682	-0.02235
305.2	-0.02567	-0.03224	-0.01863	-0.03585	-0.02168
305.4	-0.02557	-0.03173	-0.01806	-0.03544	-0.02109
305.6	-0.02556	-0.03126	-0.01799	-0.03486	-0.02034
305.8	-0.02599	-0.03055	-0.01794	-0.03472	-0.02074
306	-0.02628	-0.03059	-0.01822	-0.03464	-0.02125
306.2	-0.02696	-0.03029	-0.01905	-0.03493	-0.02179
306.4	-0.02718	-0.0304	-0.0192	-0.03481	-0.02219
306.6	-0.02737	-0.03024	-0.01974	-0.03459	-0.02259
306.8	-0.02795	-0.0301	-0.01976	-0.03497	-0.02276
307	-0.02871	-0.03024	-0.01992	-0.03483	-0.02301
307.2	-0.02904	-0.03019	-0.02038	-0.03462	-0.02319
307.4	-0.02905	-0.03005	-0.02007	-0.03443	-0.02305
307.6	-0.0289	-0.03049	-0.01988	-0.03463	-0.02377
307.8	-0.02904	-0.03139	-0.01968	-0.03523	-0.02412
308	-0.02952	-0.0321	-0.01985	-0.03565	-0.02431
308.2	-0.02945	-0.03229	-0.02043	-0.03637	-0.02448
308.4	-0.02969	-0.03303	-0.02036	-0.03666	-0.02482
308.6	-0.02965	-0.03381	-0.02057	-0.03672	-0.02431
308.8	-0.02907	-0.03349	-0.02023	-0.03631	-0.02386
309	-0.02904	-0.03371	-0.01998	-0.03602	-0.02394
309.2	-0.02848	-0.03386	-0.01971	-0.03601	-0.02345
309.4	-0.0287	-0.03382	-0.01999	-0.03686	-0.02357
309.6	-0.02884	-0.03393	-0.02046	-0.03706	-0.02394
309.8	-0.02872	-0.03428	-0.02024	-0.03735	-0.02456
310	-0.02882	-0.03454	-0.02058	-0.03762	-0.02472
310.2	-0.02942	-0.03473	-0.02134	-0.03793	-0.02548
310.4	-0.02891	-0.03473	-0.02092	-0.03753	-0.0251
310.6	-0.0292	-0.03471	-0.02076	-0.03754	-0.02504
310.8	-0.02885	-0.03435	-0.02044	-0.03739	-0.02458
311	-0.02933	-0.03473	-0.02037	-0.03749	-0.02472
311.2	-0.02893	-0.03458	-0.01992	-0.03728	-0.02448
311.4	-0.02913	-0.03505	-0.01964	-0.03727	-0.02473
311.6	-0.02937	-0.03575	-0.01993	-0.03761	-0.02531
311.8	-0.02989	-0.0357	-0.02065	-0.03777	-0.02539
312	-0.03032	-0.03558	-0.02113	-0.03809	-0.02512
312.2	-0.03059	-0.03579	-0.02216	-0.03827	-0.02568
312.4	-0.03061	-0.03551	-0.02221	-0.03781	-0.0255
312.6	-0.03042	-0.0352	-0.02221	-0.0375	-0.02485
312.8	-0.03047	-0.03458	-0.0219	-0.03699	-0.02472
313	-0.03121	-0.03514	-0.02232	-0.03717	-0.02523
313.2	-0.03092	-0.03498	-0.02237	-0.03722	-0.0247
313.4	-0.03078	-0.03476	-0.02274	-0.03756	-0.02467
313.6	-0.03087	-0.0348	-0.02283	-0.03754	-0.02514
313.8	-0.03066	-0.03477	-0.02234	-0.03781	-0.02488
314	-0.03111	-0.03489	-0.02252	-0.03786	-0.0246
314.2	-0.03087	-0.03447	-0.02195	-0.03767	-0.02481
314.4	-0.03031	-0.03424	-0.02137	-0.03767	-0.02445
314.6	-0.03013	-0.03424	-0.02081	-0.03759	-0.02442
314.8	-0.02989	-0.03418	-0.02094	-0.0379	-0.02437
315	-0.03046	-0.03408	-0.02032	-0.03831	-0.02449
315.2	-0.03018	-0.03433	-0.02015	-0.03826	-0.02456
315.4	-0.03075	-0.03487	-0.02038	-0.03859	-0.02499
315.6	-0.03156	-0.03541	-0.0208	-0.0394	-0.02558
315.8	-0.03196	-0.0355	-0.02139	-0.03964	-0.02557
316	-0.03244	-0.03624	-0.02154	-0.0403	-0.02615
316.2	-0.03276	-0.03642	-0.02166	-0.04019	-0.02684
316.4	-0.03248	-0.03578	-0.02124	-0.03967	-0.02611
316.6	-0.03289	-0.0357	-0.02107	-0.03925	-0.02587
316.8	-0.03321	-0.03556	-0.02155	-0.03898	-0.02603
317	-0.03328	-0.03559	-0.02143	-0.03858	-0.02606
317.2	-0.03292	-0.0355	-0.02183	-0.03828	-0.02585
317.4	-0.03285	-0.03532	-0.02232	-0.03871	-0.02602
317.6	-0.03311	-0.03535	-0.02269	-0.03895	-0.02662
317.8	-0.03307	-0.03567	-0.02262	-0.03888	-0.02646
318	-0.03258	-0.03506	-0.02246	-0.03795	-0.026
318.2	-0.0318	-0.0346	-0.02205	-0.0368	-0.02601
318.4	-0.03141	-0.0346	-0.02205	-0.03628	-0.02574
318.6	-0.03093	-0.03417	-0.02192	-0.03571	-0.02557
318.8	-0.03067	-0.03411	-0.0216	-0.03537	-0.02516
319	-0.03055	-0.03401	-0.02092	-0.03519	-0.02488
319.2	-0.03021	-0.03444	-0.02108	-0.03502	-0.02477
319.4	-0.03014	-0.0346	-0.02042	-0.03498	-0.0244
319.6	-0.03011	-0.03497	-0.02021	-0.03503	-0.02415
319.8	-0.02977	-0.03502	-0.0198	-0.03497	-0.02375
320	-0.02981	-0.03525	-0.01927	-0.03511	-0.02365
320.2	-0.02966	-0.03464	-0.01865	-0.03452	-0.02279
320.4	-0.02944	-0.03421	-0.01848	-0.03435	-0.02233
320.6	-0.02993	-0.03409	-0.0183	-0.03464	-0.02244
320.8	-0.03088	-0.0345	-0.01878	-0.03543	-0.02325
321	-0.03112	-0.03447	-0.01895	-0.03566	-0.02365
321.2	-0.03146	-0.03471	-0.0197	-0.03628	-0.02381
321.4	-0.03155	-0.03444	-0.01977	-0.03724	-0.024
321.6	-0.03177	-0.0347	-0.01996	-0.03731	-0.02426
321.8	-0.03166	-0.03458	-0.01955	-0.03717	-0.02381
322	-0.03103	-0.03424	-0.01917	-0.03653	-0.02344
322.2	-0.03064	-0.03409	-0.01887	-0.0363	-0.02342
322.4	-0.03	-0.03343	-0.01837	-0.03568	-0.02285
322.6	-0.03015	-0.03372	-0.01859	-0.03563	-0.02303
322.8	-0.02984	-0.03358	-0.01782	-0.03507	-0.02264
323	-0.03028	-0.03386	-0.01819	-0.03566	-0.02299
323.2	-0.02955	-0.03357	-0.01819	-0.03522	-0.02237
323.4	-0.02942	-0.03361	-0.01798	-0.03565	-0.02249
323.6	-0.03002	-0.03436	-0.01872	-0.03635	-0.02325
323.8	-0.03035	-0.03473	-0.01935	-0.03711	-0.02377
324	-0.03041	-0.03463	-0.01932	-0.03712	-0.02361
324.2	-0.03041	-0.03471	-0.01913	-0.03671	-0.02376
324.4	-0.0315	-0.03538	-0.02023	-0.03757	-0.02482
324.6	-0.03323	-0.0363	-0.0211	-0.0383	-0.02566
324.8	-0.03364	-0.0371	-0.02197	-0.03875	-0.02641
325	-0.0334	-0.03723	-0.02203	-0.03839	-0.02629
325.2	-0.03317	-0.03719	-0.02203	-0.03846	-0.02572
325.4	-0.03338	-0.03772	-0.02281	-0.03895	-0.02616
325.6	-0.03312	-0.038	-0.02288	-0.03862	-0.02564
325.8	-0.0329	-0.03852	-0.02303	-0.03827	-0.02581
326	-0.03262	-0.0387	-0.02294	-0.03765	-0.02569
326.2	-0.03238	-0.03825	-0.02305	-0.03766	-0.02547
326.4	-0.0323	-0.03848	-0.0238	-0.0375	-0.02559
326.6	-0.03295	-0.03926	-0.02437	-0.03806	-0.02606
326.8	-0.03312	-0.03916	-0.02449	-0.03827	-0.02619
327	-0.03309	-0.03918	-0.02455	-0.03866	-0.02596
327.2	-0.03239	-0.0386	-0.02443	-0.03863	-0.02568
327.4	-0.03295	-0.03875	-0.02455	-0.03979	-0.02655
327.6	-0.03316	-0.03903	-0.02453	-0.04019	-0.02671
327.8	-0.03265	-0.03845	-0.02385	-0.04026	-0.02623
328	-0.03233	-0.03803	-0.02301	-0.04036	-0.02593
328.2	-0.03269	-0.03817	-0.02252	-0.04051	-0.02605
328.4	-0.03339	-0.03775	-0.0228	-0.04066	-0.02601
328.6	-0.03301	-0.03777	-0.0221	-0.03997	-0.02531
328.8	-0.03214	-0.03713	-0.02138	-0.03941	-0.02481
329	-0.03208	-0.03651	-0.02116	-0.03909	-0.02423
329.2	-0.03168	-0.03608	-0.02133	-0.03891	-0.02363
329.4	-0.03208	-0.03643	-0.02189	-0.03888	-0.02392
329.6	-0.03186	-0.03604	-0.02142	-0.03876	-0.02335
329.8	-0.03236	-0.03629	-0.02161	-0.03851	-0.02406
330	-0.03235	-0.03575	-0.02162	-0.03884	-0.02379
330.2	-0.03248	-0.036	-0.02226	-0.03956	-0.02388
330.4	-0.03288	-0.03633	-0.02305	-0.03949	-0.02409
330.6	-0.03284	-0.03635	-0.02288	-0.03928	-0.02387
330.8	-0.03261	-0.03608	-0.02286	-0.03902	-0.02396
331	-0.03231	-0.0363	-0.02254	-0.03896	-0.02346
331.2	-0.03143	-0.0361	-0.02218	-0.03859	-0.02353
331.4	-0.0312	-0.03658	-0.02212	-0.0386	-0.02373
331.6	-0.03083	-0.03703	-0.02194	-0.0386	-0.02413
331.8	-0.0307	-0.03725	-0.0218	-0.03845	-0.02468
332	-0.03081	-0.03762	-0.02197	-0.03863	-0.02502
332.2	-0.0313	-0.03798	-0.02177	-0.03842	-0.02538
332.4	-0.03102	-0.03764	-0.02131	-0.03759	-0.02529
332.6	-0.0305	-0.03752	-0.02069	-0.03691	-0.02499
332.8	-0.03071	-0.03731	-0.02053	-0.03688	-0.02525
333	-0.03113	-0.03758	-0.02104	-0.03707	-0.02549
333.2	-0.03165	-0.03778	-0.02122	-0.03722	-0.02603
333.4	-0.03209	-0.03803	-0.0216	-0.03746	-0.02675
333.6	-0.03274	-0.03761	-0.0221	-0.03802	-0.02698
333.8	-0.03306	-0.03757	-0.02243	-0.03853	-0.02736
334	-0.03325	-0.03747	-0.02299	-0.03938	-0.02761
334.2	-0.03343	-0.03725	-0.02316	-0.03975	-0.02758
334.4	-0.03375	-0.0373	-0.02353	-0.03975	-0.02758
334.6	-0.03369	-0.03686	-0.02337	-0.03995	-0.02739
334.8	-0.034	-0.03689	-0.02373	-0.04057	-0.02757
335	-0.0341	-0.03724	-0.02382	-0.04091	-0.02723
335.2	-0.03353	-0.0371	-0.02323	-0.04041	-0.02672
335.4	-0.03346	-0.03668	-0.02322	-0.04052	-0.02665
335.6	-0.03387	-0.03687	-0.02305	-0.04076	-0.02685
335.8	-0.03422	-0.0367	-0.02282	-0.04062	-0.02678
336	-0.03429	-0.03697	-0.02267	-0.04054	-0.02618
336.2	-0.03361	-0.03667	-0.02184	-0.04009	-0.02581
336.4	-0.03283	-0.03649	-0.02134	-0.03948	-0.02499
336.6	-0.03295	-0.03652	-0.02136	-0.03921	-0.0247
336.8	-0.03336	-0.03728	-0.02213	-0.03952	-0.02488
337	-0.03338	-0.03753	-0.02237	-0.03922	-0.02471
337.2	-0.03306	-0.03781	-0.02266	-0.03927	-0.02507
337.4	-0.03286	-0.03811	-0.02333	-0.03927	-0.02526
337.6	-0.03258	-0.03771	-0.02324	-0.03896	-0.02465
337.8	-0.03246	-0.03797	-0.0228	-0.03912	-0.02461
338	-0.03261	-0.03838	-0.02343	-0.03942	-0.02502
338.2	-0.03322	-0.03869	-0.02335	-0.03946	-0.02507
338.4	-0.03385	-0.03885	-0.02318	-0.03914	-0.02486
338.6	-0.03397	-0.03863	-0.02247	-0.03888	-0.02461
338.8	-0.03421	-0.03881	-0.02228	-0.03915	-0.02486
339	-0.03442	-0.03878	-0.02159	-0.03884	-0.02438
339.2	-0.03469	-0.03865	-0.02123	-0.0384	-0.02412
339.4	-0.03468	-0.03814	-0.02099	-0.0385	-0.02418
339.6	-0.03534	-0.0384	-0.021	-0.03835	-0.02455
339.8	-0.03567	-0.03824	-0.0216	-0.03859	-0.0251
340	-0.03521	-0.03812	-0.02132	-0.03795	-0.02463
340.2	-0.03466	-0.03764	-0.02121	-0.03795	-0.02448
340.4	-0.03506	-0.03802	-0.02138	-0.03819	-0.02472
340.6	-0.03536	-0.03774	-0.02154	-0.03816	-0.02522
340.8	-0.0348	-0.03748	-0.0218	-0.03808	-0.02523
341	-0.0345	-0.03686	-0.02187	-0.03772	-0.02519
341.2	-0.03386	-0.03699	-0.02185	-0.03811	-0.02551
341.4	-0.03389	-0.03699	-0.02209	-0.03813	-0.02518
341.6	-0.03401	-0.03692	-0.0218	-0.03823	-0.02497
341.8	-0.03463	-0.03785	-0.02223	-0.03896	-0.02569
342	-0.035	-0.03836	-0.02284	-0.03967	-0.0257
342.2	-0.03573	-0.03878	-0.02271	-0.04031	-0.02573
342.4	-0.03552	-0.03846	-0.02221	-0.04036	-0.02555
342.6	-0.03513	-0.0386	-0.02198	-0.04046	-0.02556
342.8	-0.03512	-0.03822	-0.02209	-0.04092	-0.02531
343	-0.03516	-0.03881	-0.02249	-0.04086	-0.02504
343.2	-0.03508	-0.03892	-0.02306	-0.04067	-0.0255
343.4	-0.03501	-0.03884	-0.02317	-0.04016	-0.02544
343.6	-0.03507	-0.03933	-0.02356	-0.03958	-0.02627
343.8	-0.03469	-0.03919	-0.0236	-0.03902	-0.02619
344	-0.03401	-0.03904	-0.02313	-0.03835	-0.02576
344.2	-0.03393	-0.03919	-0.02331	-0.03836	-0.02612
344.4	-0.03383	-0.03906	-0.02297	-0.03824	-0.02645
344.6	-0.0343	-0.03863	-0.02316	-0.03811	-0.02678
344.8	-0.03398	-0.03838	-0.02323	-0.03776	-0.02616
345	-0.03394	-0.03785	-0.02278	-0.03742	-0.02614
345.2	-0.03405	-0.03809	-0.02244	-0.03753	-0.02622
345.4	-0.03484	-0.03832	-0.02232	-0.03761	-0.02629
345.6	-0.03567	-0.0387	-0.02174	-0.03819	-0.0263
345.8	-0.03582	-0.0388	-0.0212	-0.03844	-0.02634
346	-0.03593	-0.0387	-0.02101	-0.03861	-0.02596
346.2	-0.03594	-0.03871	-0.02081	-0.03856	-0.02616
346.4	-0.03579	-0.03844	-0.02077	-0.03795	-0.02572
346.6	-0.03528	-0.03843	-0.02064	-0.03751	-0.02491
346.8	-0.03537	-0.03868	-0.02117	-0.038	-0.02478
347	-0.03547	-0.03953	-0.02176	-0.03796	-0.02519
347.2	-0.0354	-0.0396	-0.02219	-0.03793	-0.02565
347.4	-0.03523	-0.03982	-0.02261	-0.03791	-0.0257
347.6	-0.03485	-0.04	-0.02289	-0.03818	-0.02602
347.8	-0.03481	-0.03993	-0.02318	-0.0381	-0.02569
348	-0.03523	-0.04049	-0.02399	-0.03853	-0.02622
348.2	-0.03576	-0.04069	-0.02462	-0.03888	-0.02658
348.4	-0.03593	-0.04059	-0.02486	-0.03945	-0.02673
348.6	-0.03613	-0.04048	-0.0256	-0.03981	-0.02691
348.8	-0.03579	-0.04	-0.02573	-0.03979	-0.02666
349	-0.03571	-0.03981	-0.02571	-0.04006	-0.02729
349.2	-0.03603	-0.03954	-0.02546	-0.04008	-0.02695
349.4	-0.03623	-0.03926	-0.0248	-0.04039	-0.02682
349.6	-0.03597	-0.03865	-0.02442	-0.04054	-0.02678
349.8	-0.03553	-0.03816	-0.02384	-0.04015	-0.02672
350	-0.03569	-0.03842	-0.02369	-0.03948	-0.02697
350.2	-0.03514	-0.03818	-0.02334	-0.03908	-0.02641
350.4	-0.03494	-0.03828	-0.02292	-0.03856	-0.02597
350.6	-0.03471	-0.03864	-0.02262	-0.03886	-0.0259
350.8	-0.03485	-0.03884	-0.02258	-0.03919	-0.0258
351	-0.03437	-0.03867	-0.02191	-0.03888	-0.0253
351.2	-0.0343	-0.03873	-0.02211	-0.03909	-0.0253
351.4	-0.03406	-0.03859	-0.02198	-0.03857	-0.0249
351.6	-0.03447	-0.03888	-0.02184	-0.03858	-0.02455
351.8	-0.03516	-0.03983	-0.02231	-0.03853	-0.02493
352	-0.03574	-0.04026	-0.02286	-0.03859	-0.02529
352.2	-0.03582	-0.04034	-0.02302	-0.03857	-0.02494
352.4	-0.03539	-0.04008	-0.02256	-0.03826	-0.02489
352.6	-0.0354	-0.03943	-0.0225	-0.03811	-0.02501
352.8	-0.03564	-0.03948	-0.02252	-0.03822	-0.02503
353	-0.03598	-0.03946	-0.02257	-0.03858	-0.02502
353.2	-0.03594	-0.03859	-0.02175	-0.03807	-0.02411
353.4	-0.03635	-0.03868	-0.02224	-0.03882	-0.02481
353.6	-0.03634	-0.03834	-0.0227	-0.0392	-0.02535
353.8	-0.03621	-0.03805	-0.02251	-0.03916	-0.02557
354	-0.03626	-0.03811	-0.02275	-0.03919	-0.02608
354.2	-0.03599	-0.03804	-0.0227	-0.03957	-0.02585
354.4	-0.03622	-0.0385	-0.02298	-0.03954	-0.02614
354.6	-0.03626	-0.03872	-0.02333	-0.03961	-0.02615
354.8	-0.03594	-0.03884	-0.02328	-0.03964	-0.02581
355	-0.03547	-0.03918	-0.02311	-0.0397	-0.02545
355.2	-0.03562	-0.03944	-0.02358	-0.03951	-0.02581
355.4	-0.03543	-0.03983	-0.02359	-0.03923	-0.02563
355.6	-0.03572	-0.04059	-0.02385	-0.03966	-0.02555
355.8	-0.03576	-0.04123	-0.02421	-0.03953	-0.0258
356	-0.03496	-0.0405	-0.02343	-0.03867	-0.02488
356.2	-0.03487	-0.04058	-0.02327	-0.03827	-0.02473
356.4	-0.0346	-0.04036	-0.02265	-0.03776	-0.02466
356.6	-0.03498	-0.04072	-0.02253	-0.03827	-0.0245
356.8	-0.03525	-0.04139	-0.02279	-0.03849	-0.02432
357	-0.03561	-0.04124	-0.02285	-0.03872	-0.02428
357.2	-0.03539	-0.04084	-0.02262	-0.03837	-0.02387
357.4	-0.03543	-0.04068	-0.02317	-0.03896	-0.02466
357.6	-0.03556	-0.04038	-0.02335	-0.03941	-0.02519
357.8	-0.03553	-0.04025	-0.0234	-0.03957	-0.02556
358	-0.03595	-0.04055	-0.0237	-0.03994	-0.02595
358.2	-0.0365	-0.0408	-0.02389	-0.04029	-0.02633
358.4	-0.03685	-0.04108	-0.0243	-0.04031	-0.02669
358.6	-0.03716	-0.04117	-0.02434	-0.04035	-0.02699
358.8	-0.03741	-0.04134	-0.02437	-0.04062	-0.02709
359	-0.03791	-0.04156	-0.02437	-0.0405	-0.02722
359.2	-0.03852	-0.04156	-0.02468	-0.04037	-0.02771
359.4	-0.03897	-0.04189	-0.02485	-0.04043	-0.02768
359.6	-0.03935	-0.04202	-0.02492	-0.04034	-0.02762
359.8	-0.03963	-0.04198	-0.02486	-0.04006	-0.02768
360.01	-0.03963	-0.04198	-0.02486	-0.04006	-0.02768
360.21	-0.04052	-0.04251	-0.02516	-0.04026	-0.02793
360.41	-0.04175	-0.04288	-0.02559	-0.0404	-0.02797
360.61	-0.04324	-0.04361	-0.02588	-0.04077	-0.02832
360.81	-0.04473	-0.04389	-0.02582	-0.04037	-0.02846
361.01	-0.04628	-0.04476	-0.02632	-0.04061	-0.02913
361.21	-0.04796	-0.04542	-0.02655	-0.04083	-0.02957
361.41	-0.04984	-0.04622	-0.02725	-0.04105	-0.02981
361.61	-0.05148	-0.0465	-0.0275	-0.04104	-0.03004
361.81	-0.05289	-0.04707	-0.0284	-0.04152	-0.03045
362.01	-0.05366	-0.04724	-0.0286	-0.04158	-0.03065
362.21	-0.05434	-0.0478	-0.02927	-0.04203	-0.03092
362.41	-0.05507	-0.04835	-0.02945	-0.04233	-0.03109
362.61	-0.05606	-0.04847	-0.02968	-0.04236	-0.03123
362.81	-0.0573	-0.04908	-0.02993	-0.04319	-0.03195
363.01	-0.05754	-0.04937	-0.03001	-0.0432	-0.03212
363.21	-0.058	-0.04928	-0.03025	-0.04307	-0.03213
363.41	-0.05899	-0.05021	-0.03082	-0.04353	-0.03281
363.61	-0.05892	-0.05061	-0.03066	-0.04349	-0.03258
363.81	-0.05869	-0.05109	-0.03044	-0.04348	-0.03229
364.01	-0.05875	-0.05104	-0.03051	-0.04297	-0.03225
364.21	-0.05897	-0.05153	-0.03101	-0.04326	-0.03229
364.41	-0.05951	-0.05153	-0.03135	-0.04317	-0.03226
364.61	-0.05955	-0.05181	-0.03094	-0.04298	-0.03221
364.81	-0.05957	-0.05157	-0.03067	-0.04229	-0.03166
365.01	-0.05964	-0.05204	-0.03076	-0.04236	-0.03162
365.21	-0.05965	-0.05181	-0.03029	-0.04185	-0.03092
365.41	-0.05996	-0.05194	-0.03058	-0.04143	-0.03031
365.61	-0.06016	-0.0519	-0.03061	-0.04127	-0.03033
365.81	-0.06023	-0.05208	-0.03147	-0.04176	-0.03073
366.01	-0.06023	-0.05198	-0.03119	-0.04178	-0.03039
366.21	-0.06104	-0.05238	-0.03156	-0.04204	-0.03057
366.41	-0.06186	-0.05267	-0.03185	-0.04224	-0.03061
366.61	-0.06279	-0.05297	-0.03203	-0.04257	-0.03123
366.81	-0.06328	-0.05333	-0.03217	-0.04298	-0.03157
367.01	-0.0639	-0.05401	-0.03237	-0.04328	-0.03142
367.21	-0.06472	-0.05447	-0.03288	-0.04332	-0.03171
367.41	-0.06519	-0.05517	-0.03284	-0.04367	-0.0315
367.61	-0.06501	-0.05519	-0.03222	-0.0435	-0.03114
367.81	-0.06537	-0.05516	-0.03221	-0.0434	-0.03084
368.01	-0.06553	-0.05523	-0.03223	-0.04256	-0.03078
368.21	-0.06543	-0.05547	-0.03257	-0.04273	-0.0305
368.41	-0.06527	-0.05515	-0.03231	-0.04221	-0.02994
368.61	-0.06516	-0.05541	-0.03203	-0.04239	-0.02984
368.81	-0.06502	-0.05577	-0.03208	-0.04231	-0.0294
369.01	-0.06504	-0.05608	-0.03217	-0.04216	-0.02927
369.21	-0.06475	-0.0561	-0.03215	-0.04223	-0.02909
369.41	-0.06527	-0.05661	-0.03274	-0.04249	-0.02924
369.61	-0.06565	-0.0567	-0.03299	-0.04309	-0.02964
369.81	-0.06584	-0.05622	-0.03335	-0.04369	-0.02972
370.01	-0.06612	-0.05594	-0.03296	-0.04373	-0.0294
370.21	-0.0672	-0.05655	-0.03358	-0.04441	-0.03001
370.41	-0.06821	-0.0575	-0.03417	-0.04511	-0.0306
370.61	-0.06854	-0.05754	-0.034	-0.04552	-0.03097
370.81	-0.06879	-0.05723	-0.03394	-0.04569	-0.03111
371.01	-0.06945	-0.05761	-0.03364	-0.04603	-0.03107
371.21	-0.06999	-0.0577	-0.03368	-0.04574	-0.03149
371.41	-0.07099	-0.05826	-0.0338	-0.04607	-0.03156
371.61	-0.07151	-0.05864	-0.03364	-0.04607	-0.03179
371.81	-0.07179	-0.05888	-0.03373	-0.04622	-0.03175
372.01	-0.07203	-0.0587	-0.03346	-0.04539	-0.03153
372.21	-0.07185	-0.05809	-0.0332	-0.04521	-0.03127
372.41	-0.07186	-0.05832	-0.03313	-0.0448	-0.0313
372.61	-0.07207	-0.05862	-0.03286	-0.04492	-0.03196
372.81	-0.07172	-0.05894	-0.03316	-0.04487	-0.03199
373.01	-0.07168	-0.05877	-0.03315	-0.04476	-0.03213
373.21	-0.07154	-0.05847	-0.0332	-0.04457	-0.03221
373.41	-0.0719	-0.05869	-0.03372	-0.04443	-0.0319
373.61	-0.0717	-0.0579	-0.03343	-0.044	-0.03143
373.81	-0.07152	-0.05776	-0.03377	-0.04374	-0.03118
374.01	-0.07177	-0.05808	-0.03427	-0.04339	-0.031
374.21	-0.07251	-0.05889	-0.03469	-0.04332	-0.03109
374.41	-0.07262	-0.05917	-0.03478	-0.04336	-0.03135
374.61	-0.07249	-0.05899	-0.03499	-0.0437	-0.03123
374.81	-0.07281	-0.05952	-0.0355	-0.04395	-0.03175
375.01	-0.07342	-0.0603	-0.03582	-0.04392	-0.03186
375.21	-0.07413	-0.06087	-0.036	-0.04397	-0.03226
375.41	-0.07489	-0.06131	-0.03614	-0.04384	-0.03203
375.61	-0.07541	-0.06161	-0.03593	-0.04429	-0.03187
375.81	-0.07553	-0.06162	-0.03579	-0.04484	-0.03161
376.01	-0.07545	-0.06136	-0.03531	-0.04451	-0.03103
376.21	-0.07528	-0.06126	-0.0354	-0.0447	-0.03065
376.41	-0.07489	-0.0616	-0.0349	-0.04447	-0.03044
376.61	-0.07445	-0.06167	-0.03445	-0.04432	-0.03064
376.81	-0.07429	-0.06196	-0.03477	-0.04466	-0.03097
377.01	-0.07437	-0.06169	-0.03492	-0.04461	-0.03048
377.21	-0.07451	-0.06171	-0.03509	-0.04483	-0.03017
377.41	-0.07506	-0.06254	-0.03542	-0.04527	-0.02988
377.61	-0.07504	-0.06248	-0.03507	-0.04509	-0.0297
377.81	-0.07514	-0.06302	-0.03517	-0.04492	-0.02956
378.01	-0.07519	-0.06327	-0.03529	-0.04464	-0.02946
378.21	-0.07543	-0.06345	-0.03509	-0.04447	-0.02957
378.41	-0.07561	-0.06395	-0.03568	-0.04518	-0.03045
378.61	-0.07596	-0.06451	-0.03643	-0.04554	-0.03094
378.81	-0.07606	-0.0647	-0.03668	-0.04526	-0.0315
379.01	-0.07677	-0.06488	-0.03707	-0.0453	-0.03208
379.21	-0.07754	-0.06479	-0.03695	-0.04552	-0.03253
379.41	-0.0782	-0.06497	-0.03749	-0.0458	-0.03318
379.61	-0.07897	-0.06534	-0.0377	-0.04653	-0.03345
379.81	-0.07896	-0.06565	-0.03811	-0.04707	-0.03355
380.01	-0.07909	-0.06504	-0.03807	-0.04664	-0.03324
380.21	-0.07934	-0.06465	-0.03819	-0.04693	-0.03322
380.41	-0.07897	-0.06437	-0.03747	-0.04661	-0.03302
380.61	-0.07874	-0.06431	-0.03763	-0.04697	-0.03312
380.81	-0.07858	-0.06339	-0.03705	-0.04641	-0.03251
381.01	-0.07891	-0.06334	-0.03748	-0.04683	-0.03214
381.21	-0.07873	-0.06348	-0.03694	-0.04686	-0.03182
381.41	-0.07877	-0.06379	-0.03704	-0.0471	-0.03176
381.61	-0.07811	-0.06338	-0.0363	-0.04637	-0.03102
381.81	-0.07783	-0.06333	-0.036	-0.04587	-0.03057
382.01	-0.07716	-0.06279	-0.0354	-0.0452	-0.02995
382.21	-0.07756	-0.06331	-0.03572	-0.04531	-0.03024
382.41	-0.0772	-0.06348	-0.03546	-0.04516	-0.03029
382.61	-0.07716	-0.06352	-0.03557	-0.04502	-0.0302
382.81	-0.07757	-0.06363	-0.0358	-0.0451	-0.03026
383.01	-0.07812	-0.06379	-0.03609	-0.04537	-0.03058
383.21	-0.07835	-0.06402	-0.03621	-0.04537	-0.03072
383.41	-0.07863	-0.06398	-0.03643	-0.04533	-0.03093
383.61	-0.07925	-0.06463	-0.03701	-0.04568	-0.03076
383.81	-0.07921	-0.06427	-0.03681	-0.04589	-0.03014
384.01	-0.07908	-0.06324	-0.03606	-0.0458	-0.02968
384.21	-0.07906	-0.06314	-0.03569	-0.04629	-0.02918
384.41	-0.07912	-0.0631	-0.03551	-0.04658	-0.02904
384.61	-0.07854	-0.06235	-0.03562	-0.04664	-0.02858
384.81	-0.07872	-0.06228	-0.03579	-0.0462	-0.02838
385.01	-0.0787	-0.06308	-0.03624	-0.04661	-0.02868
385.21	-0.07799	-0.06312	-0.03586	-0.04614	-0.02815
385.41	-0.07764	-0.06321	-0.03588	-0.04604	-0.02802
385.61	-0.07737	-0.06317	-0.0356	-0.04532	-0.02755
385.81	-0.07703	-0.06312	-0.03548	-0.04483	-0.02733
386.01	-0.07675	-0.06331	-0.03517	-0.04409	-0.02705
386.21	-0.07708	-0.0641	-0.03564	-0.04418	-0.02752
386.41	-0.07732	-0.06429	-0.03574	-0.04392	-0.02745
386.61	-0.07842	-0.06508	-0.03678	-0.04426	-0.02804
386.81	-0.07888	-0.06565	-0.03747	-0.0444	-0.02847
387.01	-0.07932	-0.06595	-0.03767	-0.04483	-0.02868
387.21	-0.07972	-0.06655	-0.03842	-0.04461	-0.02885
387.41	-0.07999	-0.0669	-0.03869	-0.04491	-0.02883
387.61	-0.08022	-0.0674	-0.03884	-0.0452	-0.02888
387.81	-0.08016	-0.06668	-0.0382	-0.04528	-0.02837
388.01	-0.07995	-0.06662	-0.0381	-0.04546	-0.02821
388.21	-0.08052	-0.06695	-0.03835	-0.0461	-0.02836
388.41	-0.08058	-0.06659	-0.03821	-0.0463	-0.0286
388.61	-0.08033	-0.06638	-0.03838	-0.04626	-0.02874
388.81	-0.08088	-0.06723	-0.03839	-0.04649	-0.02898
389.01	-0.08108	-0.06767	-0.03835	-0.04688	-0.02936
389.21	-0.08117	-0.06769	-0.03814	-0.04664	-0.02927
389.41	-0.08069	-0.06688	-0.03768	-0.04621	-0.02898
389.61	-0.08043	-0.06659	-0.03747	-0.04617	-0.02894
389.81	-0.08042	-0.06658	-0.03792	-0.04611	-0.02934
390.01	-0.08118	-0.06724	-0.03872	-0.04648	-0.03035
390.21	-0.08192	-0.06764	-0.03979	-0.04717	-0.03111
390.41	-0.08288	-0.06815	-0.04049	-0.04765	-0.03196
390.61	-0.08347	-0.0687	-0.04096	-0.04824	-0.03263
390.81	-0.08355	-0.06824	-0.04098	-0.04834	-0.03294
391.01	-0.08413	-0.06854	-0.04106	-0.04885	-0.03309
391.21	-0.08366	-0.06843	-0.04108	-0.04818	-0.03298
391.41	-0.08311	-0.06808	-0.04047	-0.04788	-0.03267
391.61	-0.08283	-0.06759	-0.03994	-0.04793	-0.0324
391.81	-0.08209	-0.06699	-0.03918	-0.04768	-0.03177
392.01	-0.08213	-0.06717	-0.03868	-0.04761	-0.03146
392.21	-0.08245	-0.06685	-0.03828	-0.04757	-0.03132
392.41	-0.08197	-0.06646	-0.0375	-0.04706	-0.03113
392.61	-0.08205	-0.0667	-0.0373	-0.04687	-0.0309
392.81	-0.08181	-0.06629	-0.03673	-0.04621	-0.03017
393.01	-0.08163	-0.06604	-0.03687	-0.04596	-0.03017
393.21	-0.08106	-0.06557	-0.03654	-0.0454	-0.02971
393.41	-0.08084	-0.06524	-0.03644	-0.04537	-0.02926
393.61	-0.08109	-0.06563	-0.03705	-0.04598	-0.02951
393.81	-0.0818	-0.06611	-0.03804	-0.04645	-0.03022
394.01	-0.08223	-0.06666	-0.03884	-0.04701	-0.03074
394.21	-0.08277	-0.06692	-0.03921	-0.0474	-0.03114
394.41	-0.08394	-0.06725	-0.03923	-0.04789	-0.03169
394.61	-0.08406	-0.06693	-0.03937	-0.04833	-0.03157
394.81	-0.08458	-0.06668	-0.03921	-0.04808	-0.03126
395.01	-0.08507	-0.06717	-0.03943	-0.04816	-0.03136
395.21	-0.08456	-0.06659	-0.03903	-0.04739	-0.03096
395.41	-0.08453	-0.06667	-0.0391	-0.0475	-0.03059
395.61	-0.08448	-0.06643	-0.03872	-0.04759	-0.03018
395.81	-0.08417	-0.06621	-0.03828	-0.04715	-0.02963
396.01	-0.08477	-0.06652	-0.03882	-0.04748	-0.02977
396.21	-0.08477	-0.06647	-0.03932	-0.04712	-0.02977
396.41	-0.08488	-0.06662	-0.03938	-0.04711	-0.02985
396.61	-0.08475	-0.06675	-0.03919	-0.04667	-0.02944
396.81	-0.08477	-0.06661	-0.03924	-0.04636	-0.02961
397.01	-0.085	-0.0675	-0.03963	-0.04704	-0.03004
397.21	-0.08518	-0.06776	-0.03954	-0.04768	-0.03001
397.41	-0.08541	-0.06805	-0.03949	-0.04777	-0.03
397.61	-0.08502	-0.06812	-0.0395	-0.04836	-0.03025
397.81	-0.08473	-0.06803	-0.03923	-0.04867	-0.03022
398.01	-0.08479	-0.06833	-0.03942	-0.04896	-0.03061
398.21	-0.08539	-0.0686	-0.03903	-0.04931	-0.031
398.41	-0.08543	-0.06864	-0.03894	-0.0493	-0.03075
398.61	-0.08433	-0.0677	-0.03824	-0.04882	-0.02987
398.81	-0.08476	-0.06762	-0.03812	-0.0484	-0.02954
399.01	-0.08461	-0.06763	-0.03825	-0.04795	-0.02977
399.21	-0.08439	-0.06732	-0.03761	-0.04734	-0.02921
399.41	-0.08411	-0.06736	-0.03719	-0.04701	-0.02872
399.61	-0.08421	-0.06728	-0.03682	-0.04669	-0.02878
[truncated: 1,601 more rows]

## Sheet: C (right)
time	20 uM	10 uM	5 uM	2.5 uM	1.25uM
0.03	0.00177815	0.00307069	0.00576716	0.00140542	0.00303937
0.23	0.00118368	0.00301857	0.00598262	0.00159321	0.00266664
0.43	0.00093863	0.00284584	0.00606966	0.00176832	0.00237474
0.63	0.00085999	0.00304055	0.00661171	0.00207861	0.00225719
0.83	0.00050005	0.00300494	0.00683323	0.0021369	0.00198283
1.03	0.00029061	0.00284194	0.00637796	0.00191838	0.00198212
1.23	0.0003591	0.00318877	0.00638467	0.00221614	0.0017544
1.43	0.00040096	0.00346161	0.0065716	0.00252881	0.00160432
1.63	0.00080976	0.00373644	0.00713223	0.00310472	0.00170796
1.83	0.00113238	0.00408807	0.0074673	0.00357968	0.00167809
2.03	0.00171927	0.00494344	0.00768871	0.00421442	0.00202205
2.23	0.00279502	0.00600757	0.00800085	0.00494296	0.00221809
2.43	0.00386676	0.00694277	0.0084014	0.00529497	0.00224765
2.63	0.00562493	0.00752602	0.00884363	0.00582521	0.00283416
2.83	0.00668624	0.00819896	0.00907587	0.0055255	0.00299734
3.03	0.00774885	0.00847412	0.00938519	0.00577341	0.00324464
3.23	0.00896329	0.00892409	0.0100191	0.00620455	0.00387346
3.43	0.010371	0.0104692	0.0110441	0.00699789	0.00501319
3.63	0.0117964	0.0112841	0.0122491	0.00797965	0.00599912
3.83	0.0126598	0.0123872	0.0129817	0.00884956	0.00675019
4.03	0.0139016	0.0140174	0.0140293	0.00966881	0.00746608
4.23	0.014635	0.0150952	0.0146858	0.0103792	0.00762423
4.43	0.0160079	0.0159722	0.015591	0.0109162	0.00833008
4.63	0.0170855	0.0164818	0.0162042	0.011292	0.00842653
4.83	0.0184797	0.0174659	0.017142	0.0121606	0.00945149
5.03	0.0197763	0.0182824	0.0177964	0.0128617	0.010162
5.23	0.0207812	0.0188045	0.0186676	0.0135419	0.0101809
5.43	0.0215513	0.0190187	0.0194896	0.0140909	0.0103616
5.63	0.0226023	0.0195376	0.0206129	0.0151203	0.0107726
5.83	0.0233116	0.0202555	0.0209177	0.0152921	0.01106
6.03	0.024629	0.0212323	0.0216016	0.0158724	0.0115975
6.23	0.0261309	0.0220085	0.0226178	0.0164596	0.0120808
6.43	0.0268838	0.0223119	0.023059	0.016649	0.0124305
6.63	0.02751	0.0227765	0.0232746	0.0163868	0.0127592
6.83	0.0287199	0.0237594	0.0237888	0.0163866	0.0131036
7.03	0.0295388	0.0240631	0.0240214	0.0167816	0.0131874
7.23	0.0307454	0.0255974	0.0248183	0.0174726	0.0140263
7.43	0.0312328	0.0270229	0.025225	0.0180408	0.0144723
7.63	0.0317953	0.0278883	0.0256857	0.0189149	0.0149414
7.83	0.0328312	0.0289127	0.0260692	0.0195553	0.0153368
8.03	0.0338662	0.0298659	0.0267701	0.0201702	0.0156989
8.23	0.034818	0.0303635	0.027061	0.020897	0.0159859
8.43	0.0358958	0.030753	0.0272436	0.0211941	0.0160978
8.63	0.0369823	0.0309984	0.0275157	0.0215563	0.0158033
8.83	0.0379341	0.0322781	0.0282902	0.0226569	0.0166086
9.03	0.0380536	0.0324428	0.0280902	0.0228034	0.0161792
9.23	0.0384046	0.0323888	0.0277853	0.0227696	0.0158234
9.43	0.0389801	0.0326944	0.028303	0.0232086	0.0160518
9.63	0.0401634	0.0334834	0.0290379	0.0241894	0.0168603
9.83	0.0409448	0.0339896	0.0291291	0.0240861	0.0171415
10.03	0.0419098	0.0341691	0.0299132	0.024722	0.0172256
10.23	0.0425693	0.034655	0.0305407	0.0253533	0.0174554
10.43	0.0432944	0.0351737	0.0311624	0.0257496	0.0180616
10.63	0.0442615	0.0362054	0.0318118	0.02641	0.0186255
10.83	0.0457874	0.0371381	0.0325619	0.0271386	0.0188789
11.03	0.0460454	0.0377714	0.0330641	0.0274678	0.0191037
11.23	0.0467392	0.0391305	0.0338389	0.0280918	0.0194647
11.43	0.0466551	0.0391962	0.033909	0.0280517	0.0188039
11.63	0.0469267	0.0392836	0.0341718	0.0278042	0.0186042
11.83	0.0482388	0.0396224	0.0345792	0.0284021	0.0189036
12.03	0.0489671	0.0402962	0.0349919	0.028416	0.0190791
12.23	0.0499801	0.0407717	0.035742	0.0288205	0.0190517
12.43	0.0505928	0.0412386	0.0357403	0.0287489	0.0189112
12.63	0.0514193	0.0419547	0.0362987	0.0291081	0.0188411
12.83	0.0523601	0.0430238	0.0364034	0.0298203	0.0193244
13.03	0.0535767	0.0437068	0.0371307	0.0304014	0.0197682
13.23	0.0549488	0.0443784	0.0379503	0.0305348	0.0204361
13.43	0.0563215	0.0455885	0.0389239	0.0315592	0.0213722
13.63	0.0579756	0.047249	0.0399309	0.0328812	0.0224296
13.83	0.0589603	0.0480978	0.040419	0.0330447	0.0223414
14.03	0.0599034	0.0486905	0.041086	0.0339404	0.0226686
14.23	0.0601372	0.0495036	0.0412402	0.0343246	0.0231504
14.43	0.0607352	0.0498301	0.0414742	0.0342213	0.0236989
14.63	0.0613175	0.0501916	0.0416756	0.0348232	0.0238506
14.83	0.061699	0.0506597	0.0416535	0.0351414	0.023943
15.03	0.061847	0.0512762	0.0418053	0.0355529	0.0243434
15.23	0.0624077	0.0519648	0.0421933	0.0358729	0.0244547
15.43	0.0620314	0.0512484	0.0417675	0.0351143	0.0238089
15.63	0.0624205	0.0515089	0.0415807	0.0349232	0.0239741
15.83	0.0641732	0.0529064	0.0423445	0.0360414	0.025265
16.03	0.0650616	0.0539545	0.0431578	0.0364191	0.0258453
16.23	0.0659581	0.0549043	0.0438936	0.0372483	0.0266131
16.43	0.0665914	0.0555925	0.0435638	0.0377106	0.0270522
16.63	0.0678797	0.0566445	0.0441855	0.038273	0.0274253
16.83	0.0692854	0.0580021	0.0451521	0.0393438	0.0285449
17.03	0.0704199	0.0593855	0.0464217	0.0399053	0.0293818
17.23	0.0711859	0.0605456	0.0470932	0.0397998	0.0299528
17.43	0.0723138	0.0621927	0.0482538	0.0407661	0.0307898
17.63	0.0735214	0.0627594	0.0489461	0.0410775	0.0308674
17.83	0.0743101	0.0632331	0.0491008	0.0407966	0.0306634
18.03	0.0747695	0.0638945	0.0494047	0.0410971	0.0307941
18.23	0.0748031	0.0643877	0.0495999	0.0411033	0.0310032
18.43	0.0754372	0.0647135	0.0502111	0.0413008	0.0311888
18.63	0.0759521	0.064999	0.0508118	0.0417768	0.0314851
18.83	0.0762845	0.0652485	0.0510271	0.0419357	0.0314653
19.03	0.0771252	0.0654542	0.0513126	0.0418168	0.0315676
19.23	0.077686	0.0652581	0.0515371	0.0418586	0.031486
19.43	0.0778966	0.0646264	0.0509883	0.041296	0.030662
19.63	0.0799248	0.0656939	0.0514442	0.0423758	0.0311265
19.83	0.0817192	0.0667038	0.0526201	0.043805	0.0317654
20.03	0.0823798	0.0669739	0.053065	0.0447605	0.0320301
20.23	0.0829758	0.067352	0.05286	0.0454982	0.0320802
20.43	0.0838395	0.0671116	0.0532426	0.0457633	0.0317595
20.63	0.0851552	0.0680485	0.0543113	0.0467318	0.0324485
20.83	0.0862579	0.0689038	0.0554952	0.0479625	0.0333217
21.03	0.0871153	0.0699029	0.0560227	0.0483804	0.0337302
21.23	0.0879671	0.0704563	0.0564157	0.0487482	0.0340235
21.43	0.0890316	0.0713389	0.0572269	0.0494263	0.0344289
21.63	0.0899415	0.0716233	0.0575696	0.0494854	0.0339411
21.83	0.0907146	0.0730696	0.0581867	0.0498596	0.0345184
22.03	0.0915378	0.0741814	0.0589813	0.0503163	0.0350357
22.23	0.092037	0.0747681	0.0593199	0.0506303	0.0353981
22.43	0.0923003	0.0753709	0.0598647	0.050467	0.035409
22.63	0.09257	0.0755993	0.0598652	0.0500007	0.0351153
22.83	0.0936273	0.0761016	0.0600606	0.0500098	0.0353753
23.03	0.0942071	0.0766287	0.0597171	0.0497118	0.035358
23.23	0.0946722	0.0765716	0.0594511	0.0494137	0.0349118
23.43	0.0950179	0.0772463	0.0591246	0.0490947	0.0345129
23.63	0.0958061	0.0780261	0.0592978	0.0497785	0.0348149
23.83	0.0958534	0.0783367	0.0593406	0.0498975	0.0350478
24.03	0.0959519	0.0783126	0.0590104	0.049716	0.0349924
24.23	0.0965859	0.0785734	0.0589093	0.0496987	0.0351915
24.43	0.0975067	0.07961	0.0598976	0.0502394	0.0362791
24.63	0.0988266	0.0808724	0.0611713	0.0515591	0.0373358
24.83	0.100054	0.0818154	0.0619815	0.0528214	0.0381918
25.03	0.101276	0.0828503	0.0627407	0.0540246	0.0388864
25.23	0.102014	0.0834814	0.0635789	0.0544443	0.0392171
25.43	0.103272	0.0848647	0.0648936	0.0551571	0.0400623
25.63	0.104051	0.0859359	0.0657721	0.0555954	0.0404373
25.83	0.105333	0.0872706	0.06705	0.0568842	0.041401
26.03	0.105914	0.087886	0.0677621	0.0572476	0.0417649
26.23	0.106345	0.0887353	0.0688316	0.0578335	0.0422827
26.43	0.107045	0.0894927	0.0699753	0.0584373	0.0428098
26.63	0.107729	0.0897559	0.0701972	0.0587294	0.0428784
26.83	0.108446	0.0901221	0.0704513	0.0591352	0.0433271
27.03	0.108259	0.0902978	0.0701248	0.0588545	0.0429164
27.23	0.108611	0.0900313	0.0701932	0.058506	0.042773
27.43	0.108781	0.0905995	0.0702687	0.0584768	0.0428896
27.63	0.108988	0.0906451	0.0700858	0.058346	0.0430461
27.83	0.109708	0.0912213	0.0699447	0.0584143	0.0434403
28.03	0.110645	0.0915717	0.0700442	0.0585167	0.0436024
28.23	0.111659	0.0923361	0.0705222	0.0591808	0.0440092
28.43	0.113017	0.0936782	0.0712712	0.0600462	0.0446384
28.63	0.114581	0.09403	0.0719434	0.061211	0.0446733
28.83	0.115452	0.0945411	0.0719534	0.0620694	0.0451991
29.03	0.116455	0.0950568	0.0721106	0.0621054	0.0451225
29.23	0.117513	0.0959998	0.0724434	0.0620149	0.0452874
29.43	0.118578	0.0970167	0.0730573	0.0629483	0.0456466
29.63	0.119165	0.0976011	0.0733329	0.0636334	0.0452572
29.83	0.120041	0.0981354	0.0738851	0.0647001	0.0451226
30.03	0.120394	0.0986139	0.0742045	0.0648904	0.0451874
30.23	0.121396	0.0996147	0.0752693	0.0659451	0.0457083
30.43	0.121822	0.0997201	0.0756388	0.0665654	0.0455916
30.63	0.121882	0.0996916	0.0757976	0.0662222	0.0449224
30.83	0.12244	0.100203	0.0762117	0.0665935	0.0453998
31.03	0.123101	0.100616	0.0768493	0.0668524	0.0453943
31.23	0.123707	0.100991	0.0773338	0.067076	0.0454199
31.43	0.124546	0.102131	0.0782065	0.0676484	0.0460385
31.63	0.124317	0.102244	0.0781315	0.0677622	0.0461362
31.83	0.124817	0.103086	0.0785962	0.0679382	0.0467397
32.03	0.125202	0.103194	0.0785983	0.0681313	0.0469598
32.23	0.125605	0.103692	0.0788249	0.0688255	0.0474125
32.43	0.126446	0.104601	0.0790031	0.0692713	0.0481337
32.63	0.127274	0.104954	0.0793989	0.0700742	0.048483
32.83	0.128464	0.105836	0.080161	0.0706316	0.0497208
33.03	0.129889	0.106657	0.080406	0.0709827	0.0502884
33.23	0.131171	0.107586	0.0812253	0.0720105	0.051082
33.43	0.13143	0.107751	0.0815372	0.0727083	0.0510084
33.63	0.132345	0.108601	0.0814571	0.0729479	0.0507261
33.83	0.132961	0.109124	0.0817535	0.0734665	0.0511366
34.03	0.134253	0.110162	0.0825558	0.0737512	0.0517194
34.23	0.134676	0.110628	0.0830803	0.0740801	0.0515349
34.43	0.13505	0.110463	0.0833332	0.0740006	0.0515096
34.63	0.135979	0.110928	0.0838301	0.0738256	0.0514419
34.83	0.13688	0.111439	0.0842761	0.0742459	0.0519648
35.03	0.137609	0.111695	0.0848181	0.0742207	0.0517828
35.23	0.13756	0.11198	0.0847423	0.0737727	0.0519679
35.43	0.137624	0.112191	0.0850854	0.073726	0.0523776
35.63	0.137102	0.111532	0.0845045	0.0728898	0.0515929
35.83	0.137692	0.111808	0.0846207	0.0724407	0.0519876
36.03	0.138202	0.112275	0.0852036	0.0729933	0.0522632
36.23	0.138605	0.112893	0.0855924	0.0733883	0.052594
36.43	0.139378	0.113273	0.0859304	0.0734542	0.0526907
36.63	0.140722	0.11432	0.0868766	0.0746512	0.0534463
36.83	0.141488	0.115013	0.0874242	0.0753007	0.0543256
37.03	0.141927	0.115851	0.0878729	0.0760048	0.0545846
37.23	0.142883	0.116714	0.0883247	0.0764156	0.0548233
37.43	0.143173	0.117257	0.0880108	0.0763395	0.0545585
37.63	0.144033	0.118192	0.0881084	0.0766898	0.054765
37.83	0.14475	0.118804	0.0883848	0.0774376	0.0552831
38.03	0.145561	0.119929	0.0888392	0.077985	0.0555749
38.23	0.145519	0.120066	0.0890693	0.0786891	0.0556229
38.43	0.146248	0.121088	0.089539	0.0794388	0.0561859
38.63	0.146981	0.12191	0.0903833	0.0798926	0.056858
38.83	0.147376	0.122629	0.090896	0.0804722	0.0573534
39.03	0.147967	0.123191	0.0913471	0.080759	0.0573339
39.23	0.147964	0.12335	0.0916354	0.080828	0.0575128
39.43	0.149254	0.123594	0.0928247	0.081808	0.0578892
39.63	0.150249	0.12431	0.0938787	0.0825117	0.0582412
39.83	0.151173	0.124709	0.0947283	0.0832903	0.0587633
40.03	0.151758	0.125396	0.0958047	0.0841764	0.0591298
40.23	0.151637	0.125088	0.095602	0.083793	0.0586611
40.43	0.152549	0.125849	0.0962642	0.0843966	0.0592203
40.63	0.153491	0.126613	0.0969903	0.0853413	0.0600158
40.83	0.153687	0.126664	0.0974455	0.0854118	0.06001
41.03	0.15463	0.127328	0.0974628	0.0853964	0.0600352
41.23	0.155539	0.12741	0.0970696	0.0849925	0.0601165
41.43	0.15607	0.127762	0.0970784	0.0849653	0.0603959
41.63	0.156441	0.12773	0.0971607	0.0848189	0.0604397
41.83	0.157734	0.128526	0.0976654	0.0854326	0.0613642
42.03	0.15774	0.12906	0.0979939	0.0854617	0.0616315
42.23	0.158122	0.129906	0.0982192	0.0857112	0.061872
42.43	0.158873	0.130847	0.098611	0.0861053	0.0621353
42.63	0.160009	0.131327	0.0990969	0.0866723	0.0625203
42.83	0.160202	0.13162	0.098943	0.0868958	0.0619185
43.03	0.160714	0.131438	0.0990923	0.0869184	0.0615913
43.23	0.161112	0.131663	0.0991489	0.0868667	0.0617501
43.43	0.162537	0.132421	0.100117	0.0880324	0.0624826
43.63	0.162887	0.133014	0.100338	0.0883307	0.0624213
43.83	0.163611	0.133073	0.100603	0.0889815	0.0627369
44.03	0.163542	0.133615	0.101117	0.0887813	0.0630729
44.23	0.163994	0.134487	0.102017	0.0894437	0.063547
44.43	0.164544	0.135373	0.102547	0.0903211	0.0642021
44.63	0.164696	0.135852	0.102867	0.0906266	0.0645884
44.83	0.164925	0.136173	0.103098	0.0907586	0.0643913
45.03	0.165356	0.13688	0.102853	0.0908335	0.0649062
45.23	0.165715	0.136896	0.103052	0.0909753	0.0652761
45.43	0.166549	0.137739	0.103885	0.0914833	0.0659939
45.63	0.167112	0.138414	0.104471	0.0915283	0.0665562
45.83	0.167631	0.139395	0.105238	0.0920194	0.0671546
46.03	0.167362	0.139987	0.105105	0.0916386	0.0665899
46.23	0.16831	0.14086	0.105691	0.0917722	0.0664265
46.43	0.168901	0.141527	0.10604	0.0920418	0.066347
46.63	0.169652	0.14206	0.106535	0.0921301	0.0661796
46.83	0.169328	0.141895	0.10637	0.0920507	0.0656002
47.03	0.16997	0.141825	0.106404	0.0916228	0.0654313
47.23	0.170337	0.142468	0.106461	0.0916224	0.0652176
47.43	0.171573	0.143372	0.107283	0.0926676	0.0661104
47.63	0.171902	0.143349	0.107126	0.0923463	0.0658224
47.83	0.173045	0.144041	0.108152	0.0932311	0.0667274
48.03	0.173507	0.144492	0.108771	0.0934161	0.0670081
48.23	0.174367	0.145415	0.109561	0.0942563	0.0674721
48.43	0.174595	0.145551	0.109199	0.0943931	0.0670766
48.63	0.175543	0.145718	0.109455	0.0946261	0.0671157
48.83	0.175852	0.145331	0.109331	0.0946	0.0667942
49.03	0.176391	0.145808	0.109492	0.0948886	0.0675794
49.23	0.177539	0.146243	0.110071	0.0952135	0.0681614
49.43	0.177704	0.146838	0.110656	0.0955199	0.0688412
49.63	0.178353	0.147937	0.111034	0.0958844	0.0695708
49.83	0.178386	0.14796	0.111114	0.0959179	0.0692223
50.03	0.179556	0.148581	0.111536	0.0962254	0.0695078
50.23	0.180122	0.149368	0.112036	0.0965088	0.0697831
50.43	0.17986	0.150204	0.112018	0.0966985	0.0700684
50.63	0.180047	0.150816	0.112492	0.0971301	0.0705131
50.83	0.18029	0.15147	0.112838	0.0978803	0.0705739
51.03	0.180999	0.152108	0.11312	0.0979914	0.0706615
51.23	0.18147	0.15322	0.113602	0.0991913	0.0709005
51.43	0.181966	0.153704	0.113783	0.0997883	0.0711096
51.63	0.182738	0.153565	0.113988	0.0999021	0.0711113
51.83	0.183562	0.154716	0.114843	0.101394	0.0718448
52.03	0.184492	0.155057	0.115117	0.101888	0.071656
52.23	0.184851	0.155373	0.115354	0.102247	0.071341
52.43	0.185762	0.15539	0.11577	0.102846	0.0710954
52.63	0.186662	0.155637	0.116363	0.103477	0.0714756
52.83	0.187106	0.155863	0.116383	0.104166	0.071832
53.03	0.188004	0.156989	0.117219	0.104889	0.0725377
53.23	0.189339	0.158042	0.11825	0.10567	0.0732554
53.43	0.189609	0.158223	0.118568	0.106408	0.0736453
53.63	0.190885	0.158267	0.118592	0.106575	0.0738289
53.83	0.191223	0.15833	0.119086	0.107007	0.0737525
54.03	0.191823	0.159091	0.119627	0.107192	0.0739943
54.23	0.19148	0.159285	0.119244	0.106876	0.0738689
54.43	0.191473	0.159612	0.119369	0.106275	0.0738331
54.63	0.19197	0.160058	0.119874	0.106147	0.0741626
54.83	0.192802	0.160117	0.120259	0.106515	0.0741098
55.03	0.19313	0.160434	0.120249	0.106516	0.0741972
55.23	0.193591	0.160705	0.120349	0.106901	0.0743592
55.43	0.193828	0.161011	0.120211	0.106648	0.0742293
55.63	0.194506	0.161437	0.12044	0.106768	0.0747215
55.83	0.194737	0.162166	0.120708	0.107314	0.0748103
56.03	0.195895	0.162787	0.12155	0.107695	0.0751324
56.23	0.196012	0.162999	0.121427	0.1076	0.0754102
56.43	0.196534	0.163898	0.122377	0.108393	0.0760737
56.63	0.196749	0.164439	0.122619	0.109102	0.0765096
56.83	0.197224	0.165117	0.123181	0.109709	0.0766918
57.03	0.197755	0.165896	0.123778	0.109854	0.0767955
57.23	0.198465	0.1664	0.124469	0.110646	0.0771415
57.43	0.198923	0.166907	0.124898	0.111595	0.0775916
57.63	0.199527	0.167382	0.125631	0.112043	0.0778208
57.83	0.199626	0.168461	0.126649	0.112827	0.0784251
58.03	0.19998	0.168725	0.126723	0.112605	0.0781367
58.23	0.200439	0.168576	0.126871	0.112634	0.0783299
58.43	0.201225	0.169545	0.127748	0.112973	0.0788342
58.63	0.201795	0.169586	0.127759	0.113533	0.079413
58.83	0.202407	0.170128	0.127769	0.114275	0.0799969
59.03	0.202791	0.170788	0.127843	0.114295	0.0799391
59.23	0.203641	0.171277	0.128061	0.114774	0.0802218
59.43	0.203949	0.17181	0.128164	0.114698	0.0803093
59.63	0.205462	0.172503	0.128865	0.115283	0.0811982
59.83	0.20673	0.173225	0.12909	0.115858	0.0815846
60.03	0.207494	0.174185	0.129463	0.116426	0.0821047
60.23	0.207734	0.174693	0.129568	0.116461	0.0824524
60.43	0.2082	0.175654	0.130327	0.117262	0.0826331
60.63	0.208528	0.175591	0.130108	0.117044	0.0824588
60.83	0.209698	0.176853	0.131006	0.117656	0.0828206
61.03	0.210307	0.176867	0.131229	0.117813	0.0831205
61.23	0.210798	0.177572	0.132032	0.118695	0.0836523
61.43	0.211104	0.178173	0.132439	0.118996	0.0839578
61.63	0.211706	0.178477	0.132572	0.119242	0.0839825
61.83	0.211636	0.178307	0.132533	0.119229	0.0841107
62.03	0.211925	0.178219	0.132402	0.11905	0.0836332
62.23	0.212258	0.178375	0.13262	0.119431	0.0842026
62.43	0.21246	0.178998	0.132467	0.119391	0.0843162
62.63	0.212538	0.178659	0.132361	0.119092	0.0843822
62.83	0.212722	0.179092	0.132878	0.119136	0.0843566
63.03	0.213216	0.179187	0.133654	0.119154	0.0842765
63.23	0.213957	0.179882	0.134679	0.119786	0.085321
63.43	0.214531	0.180301	0.135404	0.119986	0.0856488
63.63	0.216287	0.181114	0.136559	0.121122	0.0866078
63.83	0.217049	0.181752	0.137101	0.122034	0.0866881
64.03	0.217688	0.182619	0.138135	0.122916	0.0872652
64.23	0.218382	0.183078	0.138661	0.123486	0.0874875
64.43	0.219287	0.183539	0.139416	0.124438	0.0875407
64.63	0.220038	0.183856	0.13998	0.124737	0.0879337
64.83	0.221095	0.184424	0.14089	0.125652	0.0886929
65.03	0.221108	0.184245	0.14067	0.125539	0.0888612
65.23	0.221704	0.184996	0.140883	0.126255	0.088721
65.43	0.222078	0.185443	0.140887	0.12671	0.089036
65.63	0.22258	0.185572	0.140662	0.12727	0.0893904
65.83	0.222434	0.185507	0.140492	0.127155	0.0893392
66.03	0.222816	0.185866	0.140378	0.12694	0.0892304
66.23	0.223638	0.186551	0.140504	0.127306	0.0898961
66.43	0.223454	0.186894	0.140248	0.126706	0.0895353
66.63	0.223409	0.187516	0.140893	0.126713	0.0897486
66.83	0.223961	0.188278	0.141488	0.126725	0.0901049
67.03	0.224235	0.188805	0.141865	0.126434	0.0904205
67.23	0.224706	0.189535	0.142281	0.126345	0.0908163
67.43	0.225058	0.189667	0.142627	0.126792	0.0909133
67.63	0.225407	0.189991	0.142983	0.127157	0.091061
67.83	0.226023	0.190514	0.143198	0.127585	0.0908004
68.03	0.226481	0.190612	0.143377	0.127955	0.0909551
68.23	0.226883	0.190806	0.143259	0.128133	0.0907703
68.43	0.226757	0.190792	0.143238	0.128096	0.0907627
68.63	0.227105	0.191278	0.14321	0.127974	0.0908613
68.83	0.22752	0.191846	0.143505	0.128424	0.0909184
69.03	0.227592	0.192152	0.143636	0.12905	0.0908313
69.23	0.228059	0.192378	0.144237	0.130129	0.0908278
69.43	0.228237	0.192422	0.1444	0.130844	0.0911401
69.63	0.229194	0.192947	0.144812	0.131997	0.0916185
69.83	0.229932	0.193529	0.14506	0.132671	0.0917107
70.03	0.230631	0.194139	0.145416	0.133432	0.0920841
70.23	0.231318	0.194525	0.145694	0.134132	0.0925258
70.43	0.231569	0.195295	0.146293	0.134478	0.0929328
70.63	0.232438	0.196115	0.146825	0.134577	0.0932802
70.83	0.233731	0.196748	0.147538	0.134867	0.0941043
71.03	0.233868	0.196813	0.147576	0.13454	0.0940762
71.23	0.235123	0.197394	0.148415	0.135188	0.0945667
71.43	0.235625	0.197833	0.149095	0.135664	0.0949445
71.63	0.236388	0.198071	0.149564	0.135457	0.095453
71.83	0.237061	0.198424	0.149856	0.135465	0.0954119
72.03	0.236902	0.198402	0.149894	0.135183	0.095534
72.23	0.236374	0.198699	0.149983	0.134501	0.0954314
72.43	0.236224	0.198146	0.149692	0.133714	0.095191
72.63	0.2371	0.19887	0.150471	0.134015	0.0955526
72.83	0.236942	0.198991	0.150271	0.134278	0.0954276
73.03	0.236935	0.198907	0.150328	0.13485	0.0952968
73.23	0.236637	0.199239	0.150138	0.134929	0.0950757
73.43	0.236504	0.199452	0.150051	0.135091	0.0953873
73.63	0.237757	0.201104	0.151115	0.136504	0.0962896
73.83	0.237525	0.201289	0.150916	0.136569	0.0961038
74.03	0.237651	0.202565	0.15175	0.137311	0.0960503
74.23	0.238449	0.203397	0.15262	0.13811	0.0965856
74.43	0.239675	0.20448	0.153959	0.139193	0.097451
74.63	0.240662	0.204971	0.154724	0.139661	0.0977479
74.83	0.241885	0.205708	0.155771	0.140798	0.0984739
75.03	0.242352	0.206082	0.156469	0.141255	0.0986402
75.23	0.243714	0.207187	0.15754	0.142085	0.0993083
75.43	0.24408	0.207791	0.158006	0.142219	0.099888
75.63	0.24478	0.20814	0.158329	0.142366	0.100634
75.83	0.245044	0.208425	0.157984	0.14223	0.100212
76.03	0.245346	0.208914	0.15806	0.142269	0.10066
76.23	0.246647	0.209816	0.1587	0.142784	0.101513
76.43	0.247781	0.210175	0.15848	0.14272	0.101954
76.63	0.248508	0.211052	0.158405	0.143395	0.102424
76.83	0.248362	0.211094	0.157481	0.143505	0.102213
77.03	0.24868	0.211515	0.157479	0.143341	0.102081
77.23	0.248209	0.211637	0.156931	0.142659	0.10194
77.43	0.248625	0.211992	0.157181	0.142619	0.102376
77.63	0.249445	0.212487	0.158122	0.143216	0.102496
77.83	0.248832	0.212004	0.157748	0.142796	0.101747
78.03	0.248799	0.212883	0.158697	0.143473	0.101799
78.23	0.249538	0.212797	0.159333	0.143937	0.102056
78.43	0.249987	0.21289	0.159987	0.144273	0.101929
78.63	0.249933	0.212877	0.160336	0.144379	0.10172
78.83	0.249637	0.212829	0.160348	0.144018	0.101395
79.03	0.249268	0.21289	0.160833	0.143763	0.101475
79.23	0.24978	0.213602	0.16157	0.143655	0.101687
79.43	0.249436	0.213674	0.161903	0.143813	0.101917
79.63	0.250167	0.213869	0.162269	0.144068	0.102386
79.83	0.251189	0.214498	0.162619	0.144505	0.102737
80.03	0.251751	0.21523	0.163038	0.145207	0.103326
80.23	0.252748	0.216012	0.163379	0.145911	0.103591
80.43	0.252827	0.216202	0.163383	0.145739	0.103561
80.63	0.253511	0.216067	0.163533	0.146341	0.103547
80.83	0.254396	0.216759	0.163798	0.146761	0.103867
81.03	0.25545	0.21766	0.164751	0.147197	0.104493
81.23	0.256333	0.218364	0.165173	0.148044	0.105081
81.43	0.25737	0.21895	0.165547	0.149007	0.105506
81.63	0.257817	0.219495	0.165752	0.149973	0.105911
81.83	0.258055	0.219843	0.165371	0.15041	0.105828
82.03	0.25804	0.220715	0.165365	0.150984	0.106272
82.23	0.258575	0.221262	0.165811	0.151158	0.106457
82.43	0.258465	0.221213	0.165632	0.150967	0.106483
82.63	0.257909	0.221243	0.165848	0.151183	0.106717
82.83	0.257886	0.22146	0.166067	0.151369	0.106952
83.03	0.258032	0.222152	0.167317	0.1523	0.107929
83.23	0.257961	0.222176	0.167831	0.152708	0.108359
83.43	0.257652	0.222194	0.167839	0.152975	0.108598
83.63	0.258612	0.222586	0.167964	0.153207	0.109181
83.83	0.25891	0.222837	0.167771	0.153043	0.10919
84.03	0.258515	0.222891	0.16742	0.15292	0.108855
84.23	0.258523	0.223483	0.168037	0.152916	0.108764
84.43	0.258803	0.223394	0.168454	0.152752	0.108754
84.63	0.259555	0.223658	0.16936	0.153234	0.109028
84.83	0.260447	0.22431	0.170021	0.153246	0.109326
85.03	0.260999	0.224657	0.170441	0.153387	0.109325
85.23	0.261798	0.225377	0.170584	0.153895	0.109268
85.43	0.262388	0.225991	0.1706	0.153944	0.109151
85.63	0.262644	0.226303	0.170763	0.153566	0.109249
85.83	0.263881	0.226712	0.171815	0.153949	0.109723
86.03	0.26459	0.227363	0.172527	0.15414	0.110151
86.23	0.264966	0.227457	0.173043	0.154306	0.110376
86.43	0.265944	0.228147	0.173635	0.155254	0.111121
86.63	0.266313	0.228838	0.174135	0.15642	0.111804
86.83	0.267189	0.229447	0.174802	0.157745	0.112768
87.03	0.267121	0.229366	0.175182	0.158354	0.11307
87.23	0.267959	0.229688	0.175236	0.158987	0.113563
87.43	0.268744	0.23117	0.17604	0.159737	0.114122
87.63	0.268865	0.23166	0.175862	0.160055	0.114239
87.83	0.269007	0.232083	0.175757	0.160428	0.114003
88.03	0.268967	0.232698	0.175884	0.161126	0.114016
88.23	0.269217	0.233425	0.17639	0.16125	0.113931
88.43	0.269855	0.233114	0.176187	0.161289	0.113646
88.63	0.270693	0.234104	0.177354	0.162191	0.11444
88.83	0.271075	0.234491	0.177261	0.162306	0.114264
89.03	0.271136	0.234887	0.177515	0.162609	0.114154
89.23	0.270913	0.235458	0.178074	0.162703	0.114071
89.43	0.270877	0.235084	0.178286	0.161964	0.113718
89.63	0.271346	0.235377	0.178984	0.162295	0.113792
89.83	0.272818	0.236009	0.179977	0.16338	0.114674
90.03	0.272927	0.235959	0.18	0.163393	0.114768
90.23	0.272915	0.23613	0.18	0.163645	0.114976
90.43	0.273916	0.2366	0.180635	0.164326	0.115461
90.63	0.273439	0.23601	0.1805	0.164145	0.11513
90.83	0.273684	0.235821	0.180826	0.164582	0.115227
91.03	0.2742	0.235965	0.181067	0.164767	0.115735
91.23	0.275354	0.236588	0.181794	0.165572	0.116597
91.43	0.275321	0.236958	0.182297	0.165836	0.116621
91.63	0.275423	0.23698	0.181807	0.165765	0.116776
91.83	0.275911	0.23722	0.181644	0.165624	0.116807
92.03	0.276251	0.237301	0.181837	0.165388	0.117312
92.23	0.277118	0.238133	0.182496	0.165894	0.118153
92.43	0.278154	0.238877	0.183155	0.166616	0.11908
92.63	0.27863	0.239908	0.183514	0.167166	0.119898
92.83	0.278108	0.240095	0.183173	0.167281	0.119611
93.03	0.278025	0.2402	0.183677	0.167118	0.119449
93.23	0.277782	0.240173	0.18332	0.166697	0.118952
93.43	0.278622	0.240091	0.183138	0.166559	0.118958
93.63	0.279676	0.241188	0.183528	0.167822	0.119507
93.83	0.280024	0.241607	0.183521	0.168145	0.120104
94.03	0.279581	0.241444	0.183232	0.167862	0.119455
94.23	0.279848	0.241693	0.183559	0.16798	0.119248
94.43	0.280398	0.24222	0.183968	0.168606	0.119105
94.63	0.280765	0.242615	0.184357	0.169056	0.11879
94.83	0.281612	0.243247	0.185136	0.169852	0.119561
95.03	0.282855	0.244511	0.186103	0.170598	0.12071
95.23	0.283406	0.245013	0.18671	0.171184	0.121025
95.43	0.283712	0.246134	0.18748	0.171382	0.121378
95.63	0.284124	0.246721	0.187841	0.171463	0.121955
95.83	0.284354	0.246745	0.188005	0.170838	0.121787
96.03	0.284921	0.247244	0.188904	0.171031	0.12217
96.23	0.285566	0.248327	0.189435	0.171581	0.122463
96.43	0.286	0.248814	0.189552	0.171665	0.122296
96.63	0.286479	0.249053	0.189617	0.171472	0.122458
96.83	0.28656	0.24953	0.190177	0.171489	0.122363
97.03	0.287278	0.249743	0.190398	0.171351	0.1226
97.23	0.287706	0.249623	0.189896	0.171638	0.122684
97.43	0.288268	0.249808	0.190299	0.172222	0.123324
97.63	0.288463	0.250245	0.190798	0.173068	0.123753
97.83	0.288002	0.249949	0.190802	0.173163	0.123572
98.03	0.288109	0.249384	0.190966	0.172828	0.123349
98.23	0.288306	0.249673	0.191328	0.173348	0.123838
98.43	0.288623	0.249761	0.191512	0.174399	0.123989
98.63	0.288779	0.250017	0.191726	0.174861	0.124259
98.83	0.288819	0.250186	0.192223	0.175046	0.12503
99.03	0.28914	0.250939	0.192559	0.175655	0.125525
99.23	0.289183	0.251512	0.192596	0.176033	0.125924
99.43	0.289127	0.252024	0.192755	0.176253	0.126127
99.63	0.289779	0.252229	0.192891	0.176398	0.126395
99.83	0.290074	0.252469	0.192858	0.176309	0.126275
100.03	0.290275	0.252919	0.193201	0.176443	0.125995
100.23	0.290889	0.253515	0.193008	0.176488	0.125934
100.43	0.291973	0.254059	0.193358	0.176658	0.125886
100.63	0.292642	0.254447	0.193678	0.176272	0.12613
100.83	0.293052	0.254896	0.19368	0.176206	0.12614
101.03	0.293631	0.255474	0.193619	0.176703	0.126766
101.23	0.294591	0.255973	0.193976	0.177289	0.12703
101.43	0.294923	0.256111	0.194387	0.177471	0.127134
101.63	0.29479	0.256432	0.194462	0.177669	0.127054
101.83	0.295084	0.256716	0.19487	0.177755	0.127475
102.03	0.295102	0.256849	0.194604	0.177681	0.127458
102.23	0.295043	0.257029	0.194443	0.178019	0.127443
102.43	0.295272	0.257239	0.194485	0.178489	0.127143
102.63	0.295925	0.258327	0.195434	0.179294	0.127923
102.83	0.295917	0.258888	0.196189	0.179561	0.128115
103.03	0.295819	0.25958	0.196523	0.180412	0.128934
103.23	0.296323	0.26046	0.197592	0.181309	0.12972
103.43	0.296555	0.260764	0.198398	0.181734	0.130053
103.63	0.297685	0.261413	0.199307	0.182307	0.130551
103.83	0.298055	0.261891	0.199997	0.182591	0.130792
104.03	0.298926	0.262517	0.201003	0.182678	0.13074
104.23	0.299749	0.263093	0.201407	0.18277	0.130839
104.43	0.299988	0.263228	0.201757	0.18304	0.130593
104.63	0.300062	0.26335	0.201578	0.182907	0.130691
104.83	0.300912	0.263985	0.201859	0.183334	0.130608
105.03	0.300846	0.264282	0.201917	0.183396	0.130512
105.23	0.301152	0.264418	0.202048	0.183706	0.130098
105.43	0.300738	0.26388	0.201495	0.183724	0.129808
105.63	0.300767	0.263967	0.201538	0.184137	0.130256
105.83	0.301489	0.264297	0.201471	0.184395	0.13057
106.03	0.301229	0.263707	0.200459	0.184517	0.129939
106.23	0.301464	0.263428	0.200834	0.184662	0.130055
106.43	0.302048	0.26364	0.201025	0.185155	0.130441
106.63	0.302236	0.263637	0.201637	0.185212	0.131032
106.83	0.301687	0.263525	0.201354	0.185035	0.131115
107.03	0.301944	0.263428	0.201399	0.185055	0.131758
107.23	0.302515	0.263552	0.201728	0.185154	0.13194
107.43	0.303101	0.26386	0.201919	0.185054	0.132185
107.63	0.30412	0.264684	0.202388	0.185592	0.132914
107.83	0.304491	0.265459	0.20309	0.185781	0.133583
108.03	0.305176	0.266235	0.203563	0.186269	0.134089
108.23	0.306072	0.267049	0.203993	0.186864	0.134679
108.43	0.306508	0.26782	0.204365	0.187758	0.13484
108.63	0.307473	0.268953	0.205259	0.188357	0.135316
108.83	0.307813	0.269801	0.206047	0.189026	0.135656
109.03	0.30764	0.270298	0.206191	0.18921	0.135976
109.23	0.30838	0.270926	0.206537	0.189954	0.136364
109.43	0.309065	0.271078	0.206838	0.190639	0.136829
109.63	0.30982	0.271943	0.207605	0.191544	0.137392
109.83	0.310669	0.272518	0.207916	0.192105	0.137808
110.03	0.311081	0.272645	0.208409	0.192273	0.138019
110.23	0.311357	0.272985	0.209079	0.192415	0.138228
110.43	0.31159	0.273125	0.209148	0.192199	0.138494
110.63	0.311317	0.272958	0.20899	0.191773	0.137848
110.83	0.311887	0.273664	0.208873	0.19217	0.137679
111.03	0.312432	0.273895	0.208958	0.192015	0.137569
111.23	0.312612	0.274115	0.209184	0.192618	0.137628
111.43	0.313278	0.274804	0.209781	0.193106	0.137847
111.63	0.313665	0.275196	0.209589	0.193582	0.137994
111.83	0.313621	0.275361	0.20981	0.193558	0.138052
112.03	0.314081	0.275594	0.209698	0.194072	0.138064
112.23	0.314729	0.276186	0.210264	0.194712	0.138573
112.43	0.314442	0.276137	0.210489	0.195305	0.138586
112.63	0.314454	0.276143	0.210824	0.195705	0.138437
112.83	0.314125	0.276403	0.210746	0.195597	0.138684
113.03	0.31489	0.276826	0.210666	0.195659	0.138705
113.23	0.315649	0.277286	0.210928	0.195947	0.139221
113.43	0.316493	0.277992	0.211891	0.196921	0.139845
113.63	0.31708	0.278724	0.212663	0.197366	0.140541
113.83	0.317405	0.279069	0.212862	0.197431	0.140739
114.03	0.317608	0.279319	0.213661	0.197096	0.140849
114.23	0.317661	0.279349	0.213572	0.197053	0.14091
114.43	0.317501	0.278969	0.213701	0.196684	0.140418
114.63	0.317917	0.279248	0.213681	0.197014	0.140343
114.83	0.318485	0.279837	0.214026	0.197044	0.140371
115.03	0.318235	0.279937	0.214358	0.197136	0.140557
115.23	0.318756	0.280194	0.214869	0.197582	0.140949
115.43	0.318577	0.280084	0.215177	0.197449	0.140736
115.63	0.318766	0.28012	0.215325	0.197934	0.140937
115.83	0.318936	0.280755	0.216095	0.198526	0.14185
116.03	0.319426	0.281263	0.216573	0.199634	0.142649
116.23	0.319883	0.281475	0.2169	0.200422	0.143515
116.43	0.32027	0.281962	0.217356	0.201103	0.143736
116.63	0.321291	0.282642	0.217949	0.202028	0.144275
116.83	0.321899	0.283741	0.218492	0.20266	0.145556
117.03	0.322983	0.284613	0.219063	0.203432	0.146562
117.23	0.323396	0.284918	0.219706	0.204181	0.147288
117.43	0.3242	0.286206	0.221123	0.205171	0.147854
117.63	0.324282	0.286537	0.2215	0.205393	0.147668
117.83	0.324144	0.286805	0.221257	0.205279	0.147229
118.03	0.324975	0.287009	0.222099	0.205397	0.147766
118.23	0.32485	0.28694	0.221823	0.205085	0.147434
118.43	0.324858	0.287043	0.22154	0.204658	0.14665
118.63	0.325269	0.287724	0.22144	0.204681	0.146587
118.83	0.325643	0.288084	0.221612	0.204225	0.146309
119.03	0.325445	0.288013	0.221366	0.203762	0.145785
119.23	0.325708	0.28791	0.221408	0.203573	0.145586
119.43	0.325827	0.288029	0.221842	0.203326	0.145484
119.63	0.32595	0.288513	0.221926	0.203415	0.145904
119.83	0.326315	0.288878	0.22177	0.203724	0.14644
120.03	0.326554	0.288938	0.222032	0.204077	0.146704
120.23	0.326328	0.289101	0.221806	0.203887	0.146912
120.43	0.326383	0.28974	0.222433	0.204147	0.147029
120.63	0.326301	0.289312	0.222368	0.20446	0.147292
120.83	0.326275	0.289606	0.222708	0.204768	0.147809
121.03	0.326284	0.289536	0.223095	0.20482	0.14795
121.23	0.326166	0.289668	0.223409	0.205274	0.147899
121.43	0.326784	0.290824	0.224331	0.206413	0.148512
121.63	0.326469	0.290454	0.224175	0.206396	0.148201
121.83	0.32667	0.290599	0.224328	0.206273	0.14861
122.03	0.327392	0.291013	0.225177	0.206936	0.149327
122.23	0.327409	0.291198	0.225163	0.207249	0.149331
122.43	0.328066	0.291898	0.225307	0.207564	0.149397
122.63	0.328697	0.292069	0.225697	0.208235	0.150046
122.83	0.329451	0.292254	0.226032	0.208698	0.150426
123.03	0.329509	0.292523	0.226028	0.209044	0.150465
123.23	0.330384	0.292503	0.226763	0.209896	0.151074
123.43	0.331029	0.292469	0.227444	0.20997	0.151577
123.63	0.330715	0.291937	0.227409	0.210183	0.151352
123.83	0.331833	0.292186	0.227947	0.211245	0.151657
124.03	0.332146	0.292541	0.228933	0.211659	0.152182
124.23	0.332156	0.292907	0.229056	0.211839	0.152189
124.43	0.332262	0.292838	0.229063	0.211904	0.151736
124.63	0.332431	0.292774	0.228769	0.21202	0.151604
124.83	0.333181	0.293388	0.228869	0.212355	0.151871
125.03	0.333575	0.293875	0.228777	0.21268	0.151641
125.23	0.333898	0.295181	0.228874	0.213361	0.152202
125.43	0.334139	0.295943	0.229116	0.213779	0.152326
125.63	0.333762	0.296076	0.228882	0.213526	0.152072
125.83	0.334226	0.297046	0.229438	0.213861	0.152534
126.03	0.334507	0.298182	0.230076	0.214205	0.153074
126.23	0.335233	0.299116	0.230503	0.214543	0.153358
126.43	0.335702	0.299781	0.230749	0.214488	0.153791
126.63	0.336313	0.300328	0.23096	0.214858	0.154745
126.83	0.336451	0.301007	0.231276	0.2149	0.154928
127.03	0.337005	0.301611	0.231718	0.214965	0.155395
127.23	0.337666	0.301001	0.232372	0.215058	0.155716
127.43	0.338156	0.301317	0.232951	0.215037	0.156103
127.63	0.338785	0.301572	0.233361	0.215344	0.156225
127.83	0.339021	0.302288	0.233863	0.21583	0.156496
128.03	0.338923	0.301687	0.233845	0.215424	0.156599
128.23	0.339132	0.301522	0.233696	0.215481	0.156403
128.43	0.339322	0.301812	0.234183	0.215623	0.156466
128.63	0.33951	0.302049	0.234067	0.216266	0.156421
128.83	0.340168	0.302338	0.233997	0.216733	0.156627
129.03	0.340689	0.302894	0.234245	0.217596	0.156522
129.23	0.340636	0.303251	0.234393	0.21817	0.156663
129.43	0.341199	0.30337	0.23491	0.218999	0.15669
129.63	0.341661	0.303652	0.235444	0.219511	0.156934
129.83	0.342134	0.304276	0.2361	0.219758	0.157251
130.03	0.342206	0.304548	0.236055	0.219741	0.157066
130.23	0.342788	0.304873	0.236719	0.220093	0.157081
130.43	0.342635	0.304739	0.236325	0.219807	0.157106
130.63	0.342602	0.304653	0.236777	0.219914	0.157265
130.83	0.342715	0.304519	0.236856	0.219989	0.157147
131.03	0.343516	0.304485	0.237197	0.220164	0.157442
131.23	0.343482	0.3044	0.237682	0.220626	0.157705
131.43	0.343976	0.305137	0.238066	0.220882	0.15773
131.63	0.344115	0.305504	0.238199	0.220955	0.15778
131.83	0.344	0.305735	0.238009	0.221018	0.157669
132.03	0.344427	0.305475	0.238261	0.22094	0.157905
132.23	0.345543	0.306736	0.239225	0.221642	0.158651
132.43	0.345444	0.307521	0.239863	0.22171	0.15881
132.63	0.346208	0.307473	0.239444	0.221901	0.159106
132.83	0.346607	0.307901	0.239544	0.222099	0.159386
133.03	0.347064	0.308648	0.239917	0.222612	0.159819
133.23	0.34744	0.309565	0.240025	0.222703	0.160322
133.43	0.348023	0.310699	0.240712	0.223355	0.161227
133.63	0.348021	0.311344	0.240988	0.223445	0.161615
133.83	0.347724	0.311214	0.240781	0.223684	0.161696
134.03	0.347411	0.31105	0.240447	0.223483	0.161437
134.23	0.347122	0.311075	0.240646	0.222988	0.161928
134.43	0.347472	0.310749	0.24029	0.223005	0.16199
134.63	0.347277	0.310157	0.240228	0.222976	0.161817
134.83	0.347745	0.310504	0.24008	0.223229	0.161916
135.03	0.347993	0.310929	0.240273	0.223703	0.162301
135.23	0.347733	0.310811	0.24013	0.22409	0.161808
135.43	0.348212	0.311596	0.240206	0.224541	0.161784
135.63	0.348669	0.312206	0.240265	0.224998	0.161942
135.83	0.349256	0.312348	0.240411	0.22553	0.162288
136.03	0.349842	0.312639	0.241215	0.225933	0.162438
136.23	0.350838	0.313448	0.242421	0.226254	0.163052
136.43	0.350789	0.313515	0.242683	0.226392	0.162939
136.63	0.352289	0.31433	0.243393	0.227599	0.163734
136.83	0.352121	0.315129	0.244045	0.228245	0.163918
137.03	0.352623	0.315981	0.244637	0.228772	0.164236
137.23	0.352804	0.316745	0.244973	0.229028	0.16441
137.43	0.352905	0.31678	0.245693	0.22976	0.164825
137.63	0.352698	0.316133	0.24593	0.229917	0.164526
137.83	0.35281	0.316143	0.245695	0.230211	0.164907
138.03	0.352586	0.316444	0.245766	0.229916	0.164973
138.23	0.35229	0.316508	0.245922	0.229405	0.164838
138.43	0.352793	0.316453	0.246403	0.229857	0.164576
138.63	0.352545	0.316721	0.246354	0.22971	0.164382
138.83	0.35325	0.317383	0.246728	0.229895	0.165207
139.03	0.353052	0.31738	0.246568	0.230001	0.16555
139.23	0.353001	0.317232	0.246485	0.229868	0.165238
139.43	0.353182	0.317939	0.246703	0.22994	0.165749
139.63	0.353677	0.317983	0.246756	0.229912	0.165984
139.83	0.354194	0.318288	0.247001	0.230289	0.166612
140.03	0.355094	0.318776	0.247605	0.230542	0.16694
140.23	0.355852	0.319608	0.248332	0.230829	0.167311
140.43	0.356823	0.319981	0.248181	0.231022	0.167537
140.63	0.357795	0.32068	0.248407	0.231231	0.167958
140.83	0.357534	0.320696	0.248235	0.231044	0.16803
141.03	0.357971	0.32094	0.248506	0.230876	0.16802
141.23	0.3587	0.321389	0.248694	0.231185	0.168176
141.43	0.358785	0.320858	0.248759	0.231392	0.167762
141.63	0.359003	0.321088	0.248566	0.231433	0.167325
141.83	0.359313	0.321744	0.248405	0.231981	0.167723
142.03	0.359191	0.321771	0.249101	0.231945	0.167481
142.23	0.359397	0.322308	0.249616	0.23215	0.167307
142.43	0.359865	0.32291	0.250366	0.232734	0.167829
142.63	0.360171	0.323515	0.250789	0.233544	0.168255
142.83	0.360772	0.324032	0.251627	0.234199	0.169235
143.03	0.360386	0.323853	0.251924	0.234611	0.169417
143.23	0.360562	0.324105	0.252371	0.235379	0.169796
143.43	0.360713	0.32456	0.252753	0.236198	0.170538
143.63	0.360854	0.324875	0.252869	0.236996	0.170727
143.83	0.361153	0.325358	0.25285	0.237728	0.171124
144.03	0.361373	0.32558	0.252878	0.237978	0.171038
144.23	0.36175	0.325925	0.253479	0.238374	0.171336
144.43	0.362545	0.326478	0.253681	0.238775	0.171898
144.63	0.36238	0.326692	0.25395	0.238783	0.171832
144.83	0.362808	0.326763	0.25424	0.239086	0.172311
145.03	0.363873	0.327234	0.254837	0.239611	0.1726
145.23	0.364242	0.327675	0.254772	0.240324	0.172519
145.43	0.364359	0.32752	0.254821	0.240382	0.172497
145.63	0.36468	0.328088	0.255019	0.241013	0.172923
145.83	0.364289	0.3279	0.255007	0.240719	0.173083
146.03	0.364373	0.328223	0.25536	0.240352	0.173281
146.23	0.364835	0.328421	0.255405	0.240163	0.173332
146.43	0.365062	0.328663	0.255747	0.240231	0.173624
146.63	0.365236	0.32837	0.255931	0.240619	0.173553
146.83	0.366097	0.328529	0.256819	0.241159	0.174421
147.03	0.366312	0.328137	0.256958	0.241276	0.174509
147.23	0.367157	0.328798	0.257427	0.24184	0.174916
147.43	0.367138	0.329064	0.257707	0.241877	0.174947
147.63	0.36659	0.328842	0.257096	0.241278	0.174331
147.83	0.367034	0.32908	0.257448	0.241293	0.174966
148.03	0.36671	0.329339	0.257133	0.240968	0.17443
148.23	0.366986	0.329553	0.257535	0.241538	0.174526
148.43	0.366923	0.329825	0.257237	0.241398	0.174133
148.63	0.366865	0.329753	0.257111	0.241081	0.17398
148.83	0.367588	0.330366	0.256987	0.241759	0.174707
149.03	0.368167	0.33131	0.257243	0.242502	0.175257
149.23	0.368174	0.332262	0.257903	0.243285	0.176004
149.43	0.368882	0.332674	0.258392	0.243672	0.176908
149.63	0.369245	0.332937	0.258832	0.244159	0.177327
149.83	0.369419	0.33315	0.258667	0.243462	0.177503
150.03	0.370259	0.333652	0.25928	0.244257	0.177955
150.23	0.370994	0.33371	0.259796	0.244483	0.177983
150.43	0.371004	0.33399	0.260235	0.244523	0.177731
150.63	0.370961	0.33369	0.260461	0.244972	0.177595
150.83	0.371353	0.333347	0.260687	0.24515	0.177612
151.03	0.371316	0.333415	0.261049	0.245066	0.177183
151.23	0.371443	0.333585	0.260984	0.245201	0.17713
151.43	0.370821	0.333662	0.260957	0.244994	0.176863
151.63	0.370418	0.33346	0.260661	0.244413	0.176429
151.83	0.370874	0.333829	0.261218	0.244519	0.176456
152.03	0.370313	0.33411	0.26112	0.244449	0.175856
152.23	0.37043	0.334029	0.261371	0.244746	0.175851
152.43	0.370335	0.334096	0.261321	0.244415	0.175894
152.63	0.370447	0.334442	0.261465	0.244799	0.176178
152.83	0.370898	0.335584	0.26197	0.245439	0.17689
153.03	0.37165	0.336825	0.263241	0.24613	0.177476
153.23	0.372355	0.337861	0.264282	0.247145	0.178224
153.43	0.373454	0.338171	0.264813	0.247574	0.17853
153.63	0.374268	0.338605	0.265512	0.247942	0.178832
153.83	0.374816	0.339216	0.266187	0.248313	0.179236
154.03	0.375627	0.339459	0.266891	0.248997	0.179443
154.23	0.376072	0.339324	0.26723	0.248907	0.179396
154.43	0.37578	0.339575	0.26728	0.248703	0.179464
154.63	0.375871	0.339371	0.267241	0.248941	0.179438
154.83	0.376435	0.339273	0.267198	0.249076	0.179558
155.03	0.376495	0.339653	0.267547	0.249434	0.179925
155.23	0.376919	0.340021	0.267453	0.249889	0.180525
155.43	0.376824	0.34007	0.267613	0.249674	0.180638
155.63	0.377253	0.339795	0.267222	0.249689	0.180627
155.83	0.377507	0.33987	0.267277	0.249741	0.180928
156.03	0.377598	0.340197	0.267696	0.250039	0.181672
156.23	0.377908	0.340468	0.267204	0.250208	0.181983
156.43	0.377752	0.340919	0.266918	0.250421	0.182102
156.63	0.378151	0.3417	0.267199	0.251336	0.182301
156.83	0.378762	0.342878	0.267554	0.251632	0.182503
157.03	0.379442	0.343522	0.268106	0.252344	0.182834
157.23	0.379697	0.343995	0.268231	0.253062	0.183392
157.43	0.380453	0.344479	0.268767	0.253503	0.183674
157.63	0.380707	0.345334	0.269308	0.254014	0.184163
157.83	0.381117	0.345883	0.270162	0.254787	0.184552
158.03	0.381729	0.345849	0.270397	0.254654	0.184666
158.23	0.381697	0.345965	0.270832	0.254548	0.184943
158.43	0.3814	0.345931	0.27137	0.254973	0.185201
158.63	0.381872	0.34602	0.271526	0.255116	0.18534
158.83	0.381721	0.345797	0.271701	0.255111	0.185508
159.03	0.381097	0.345104	0.271586	0.25453	0.185258
159.23	0.381347	0.344921	0.271538	0.254323	0.185353
159.43	0.381194	0.344687	0.271275	0.254022	0.184976
159.63	0.381663	0.344932	0.271201	0.254241	0.185041
159.83	0.38169	0.345242	0.271422	0.254311	0.185218
160.03	0.382078	0.346183	0.272081	0.25501	0.185913
160.23	0.382365	0.346822	0.272199	0.255685	0.186265
160.43	0.382626	0.347359	0.272416	0.256556	0.186318
160.63	0.383557	0.347965	0.272593	0.257321	0.186543
160.83	0.383862	0.348768	0.272814	0.25778	0.18663
161.03	0.384091	0.349347	0.273232	0.258875	0.18697
161.23	0.384239	0.350239	0.273747	0.259911	0.187198
161.43	0.384717	0.350733	0.274093	0.260222	0.187185
161.63	0.385003	0.35114	0.27475	0.261164	0.187556
161.83	0.385336	0.350851	0.274914	0.261058	0.187553
162.03	0.385785	0.350683	0.274751	0.260651	0.187332
162.23	0.386011	0.350596	0.275162	0.260915	0.187922
162.43	0.386181	0.350515	0.275508	0.261343	0.188277
162.63	0.386272	0.350745	0.275343	0.260777	0.188489
162.83	0.38603	0.350439	0.275355	0.260262	0.188428
163.03	0.386174	0.350459	0.275577	0.260108	0.188659
163.23	0.386621	0.351409	0.276121	0.260501	0.189407
163.43	0.386729	0.35214	0.276443	0.260804	0.189339
163.63	0.387035	0.35269	0.277001	0.261277	0.190032
163.83	0.386799	0.353194	0.277475	0.261507	0.190232
164.03	0.387161	0.3541	0.27839	0.262258	0.191102
164.23	0.387347	0.354256	0.278067	0.262465	0.191095
164.43	0.387028	0.354282	0.277976	0.262602	0.190808
164.63	0.386793	0.354143	0.277627	0.262161	0.190751
164.83	0.386556	0.354195	0.278073	0.262454	0.19051
165.03	0.38665	0.354074	0.278225	0.262671	0.190387
165.23	0.387229	0.354315	0.278615	0.262844	0.190537
165.43	0.387509	0.353692	0.278486	0.262402	0.189992
165.63	0.388561	0.353689	0.279152	0.262943	0.190403
165.83	0.388908	0.353354	0.278764	0.262633	0.190111
166.03	0.389882	0.353479	0.279173	0.262674	0.190368
166.23	0.390408	0.353242	0.279749	0.262605	0.191006
166.43	0.39054	0.353872	0.279859	0.262724	0.190883
166.63	0.391193	0.354719	0.280387	0.263025	0.191421
166.83	0.391679	0.355441	0.28087	0.26357	0.191764
167.03	0.392117	0.356	0.281711	0.26444	0.192254
167.23	0.392391	0.35693	0.282149	0.264935	0.192411
167.43	0.392887	0.357674	0.282719	0.2654	0.192763
167.63	0.393075	0.358711	0.283775	0.266623	0.193918
167.83	0.392634	0.358802	0.284238	0.266762	0.194089
168.03	0.392912	0.359232	0.284388	0.267311	0.194629
168.23	0.392191	0.358941	0.283939	0.266747	0.194383
168.43	0.391564	0.358434	0.284154	0.266553	0.194224
168.63	0.391473	0.358154	0.28396	0.266247	0.194417
168.83	0.39091	0.358207	0.284109	0.266316	0.193833
169.03	0.390455	0.358375	0.283795	0.265829	0.193593
169.23	0.391296	0.358954	0.28413	0.266219	0.194017
169.43	0.391636	0.358708	0.284025	0.266119	0.193547
169.63	0.392464	0.359227	0.284141	0.266832	0.194025
169.83	0.392442	0.359342	0.283636	0.26707	0.194069
170.03	0.393236	0.359553	0.284117	0.267141	0.194444
170.23	0.393463	0.359777	0.283882	0.26756	0.194321
170.43	0.394322	0.360789	0.284095	0.268354	0.194414
170.63	0.394986	0.361069	0.284299	0.268548	0.194436
170.83	0.394853	0.360974	0.284038	0.268434	0.193786
171.03	0.395827	0.361688	0.284439	0.269097	0.194081
171.23	0.396807	0.362569	0.285043	0.269314	0.194337
171.43	0.397046	0.362947	0.28542	0.269538	0.19488
171.63	0.397036	0.363176	0.286118	0.269766	0.19505
171.83	0.396936	0.362626	0.285985	0.269147	0.194862
172.03	0.397587	0.363114	0.28645	0.269158	0.195091
172.23	0.397571	0.362968	0.287079	0.269277	0.195542
172.43	0.397948	0.362851	0.287382	0.269752	0.195564
172.63	0.397667	0.363175	0.287582	0.269636	0.195634
172.83	0.397448	0.363224	0.288011	0.269639	0.195688
173.03	0.398001	0.363402	0.288204	0.269607	0.196512
173.23	0.398644	0.363706	0.288843	0.270175	0.197115
173.43	0.398447	0.363446	0.2888	0.270154	0.196916
173.63	0.398579	0.363573	0.289137	0.271029	0.197462
173.83	0.397969	0.363176	0.288954	0.271063	0.197531
174.03	0.398416	0.363617	0.289418	0.271337	0.198021
174.23	0.398404	0.363862	0.289199	0.271678	0.198143
174.43	0.398381	0.364118	0.289284	0.271739	0.198205
174.63	0.398125	0.36446	0.289105	0.271392	0.198312
174.83	0.397857	0.364918	0.288854	0.271156	0.198229
175.03	0.398447	0.366165	0.289533	0.271298	0.199166
175.23	0.39848	0.366985	0.29002	0.270612	0.199435
175.43	0.398168	0.367259	0.290021	0.270697	0.199283
175.63	0.398514	0.367788	0.290638	0.271447	0.199547
175.83	0.398877	0.368252	0.290827	0.27186	0.199867
176.03	0.399946	0.369271	0.291748	0.272732	0.200256
176.23	0.400539	0.369476	0.292463	0.273481	0.200677
176.43	0.400862	0.369392	0.29253	0.273906	0.200378
176.63	0.401214	0.369717	0.292838	0.274612	0.200902
176.83	0.401914	0.369733	0.293392	0.275195	0.201503
177.03	0.402448	0.369625	0.293679	0.275337	0.201241
177.23	0.402693	0.369665	0.294291	0.275803	0.200801
177.43	0.40266	0.369741	0.294359	0.276183	0.200587
177.63	0.402652	0.369302	0.29438	0.27652	0.2006
177.83	0.40228	0.368551	0.293584	0.276373	0.200027
178.03	0.40301	0.368975	0.294093	0.276974	0.20078
178.23	0.403213	0.36909	0.293836	0.277055	0.201216
178.43	0.402843	0.368986	0.293414	0.27677	0.201041
178.63	0.403227	0.369684	0.293542	0.276503	0.201474
178.83	0.403047	0.369498	0.292941	0.275464	0.201097
179.03	0.403721	0.369878	0.293239	0.275935	0.201883
179.23	0.404437	0.369893	0.293223	0.276242	0.201902
179.43	0.404908	0.369744	0.292727	0.27699	0.201582
179.63	0.405186	0.369416	0.292677	0.277086	0.201704
179.83	0.406065	0.369587	0.293066	0.277265	0.202188
180.03	0.407096	0.370152	0.293914	0.277854	0.202658
180.23	0.4075	0.370178	0.294579	0.278598	0.203384
180.43	0.407842	0.370453	0.294799	0.279017	0.203831
180.63	0.408488	0.371366	0.295337	0.279938	0.204511
180.83	0.408699	0.371798	0.296078	0.280248	0.204677
181.03	0.409724	0.372558	0.297112	0.281384	0.204915
181.23	0.409526	0.373481	0.297508	0.282145	0.205406
181.43	0.409396	0.374048	0.298087	0.282476	0.205752
181.63	0.409526	0.373708	0.298344	0.282888	0.206021
181.83	0.409483	0.374322	0.298674	0.283523	0.20622
182.03	0.409676	0.375502	0.299452	0.283906	0.206856
182.23	0.409511	0.375696	0.299423	0.283704	0.207026
182.43	0.409031	0.375912	0.299081	0.283284	0.206752
182.63	0.409255	0.376747	0.299258	0.283416	0.206934
182.83	0.409069	0.37669	0.298808	0.283574	0.20663
183.03	0.408771	0.37654	0.29844	0.283695	0.206492
183.23	0.408691	0.376223	0.29825	0.283705	0.20594
183.43	0.408504	0.376458	0.297708	0.283433	0.205643
183.63	0.408577	0.376437	0.297993	0.283147	0.205839
183.83	0.408787	0.376733	0.298369	0.28346	0.206102
184.03	0.408986	0.377008	0.298373	0.283281	0.206205
184.23	0.409248	0.376872	0.29851	0.283078	0.206647
184.43	0.409747	0.377481	0.298862	0.283094	0.206809
184.63	0.41025	0.377991	0.299487	0.283687	0.207155
184.83	0.410805	0.378454	0.300012	0.284027	0.207528
185.03	0.411937	0.379166	0.300908	0.284529	0.208131
185.23	0.412219	0.379557	0.301035	0.284213	0.208496
185.43	0.412618	0.379616	0.301505	0.284294	0.208846
185.63	0.413221	0.379426	0.301362	0.284481	0.208924
185.83	0.413384	0.379575	0.301752	0.284712	0.209143
186.03	0.413678	0.379403	0.301992	0.284812	0.209499
186.23	0.414155	0.378914	0.301954	0.284914	0.209775
186.43	0.414101	0.379621	0.302216	0.285345	0.210161
186.63	0.414397	0.379688	0.302688	0.28613	0.21036
186.83	0.414571	0.379962	0.302471	0.286685	0.21027
187.03	0.414263	0.379567	0.3023	0.286628	0.21005
187.23	0.414451	0.380183	0.302982	0.288073	0.21039
187.43	0.414843	0.380986	0.302558	0.288006	0.210391
187.63	0.414964	0.381019	0.302491	0.288127	0.210455
187.83	0.414936	0.381318	0.302441	0.288376	0.210757
188.03	0.414854	0.381612	0.302208	0.288243	0.211131
188.23	0.415213	0.382296	0.302872	0.288765	0.211738
188.43	0.415804	0.383094	0.303844	0.289331	0.212034
188.63	0.416258	0.38355	0.304147	0.289356	0.212309
188.83	0.416316	0.383806	0.304331	0.289422	0.212472
189.03	0.416581	0.384134	0.304674	0.289316	0.21258
189.23	0.416493	0.384433	0.304653	0.289422	0.212559
189.43	0.416265	0.384542	0.304918	0.289706	0.212589
189.63	0.416487	0.384481	0.304951	0.289864	0.212618
189.83	0.416607	0.384353	0.305362	0.290126	0.212562
190.03	0.416822	0.38415	0.305509	0.290596	0.21246
190.23	0.416887	0.384027	0.30555	0.290419	0.212197
190.43	0.41669	0.384419	0.305981	0.291143	0.212381
190.63	0.417157	0.384449	0.306067	0.291652	0.212611
190.83	0.416953	0.384479	0.306011	0.291875	0.212059
191.03	0.416905	0.384352	0.306378	0.292273	0.212143
191.23	0.417337	0.384986	0.306667	0.292629	0.212699
191.43	0.417717	0.384777	0.306058	0.29222	0.212505
191.63	0.417516	0.384415	0.306262	0.2922	0.212657
191.83	0.417814	0.385204	0.30665	0.292422	0.213622
192.03	0.41798	0.385685	0.307174	0.292607	0.214232
192.23	0.418657	0.386029	0.308023	0.292981	0.214688
192.43	0.418924	0.386269	0.308659	0.292912	0.215391
192.63	0.419041	0.386344	0.308595	0.293257	0.215899
192.83	0.41896	0.386404	0.308961	0.293477	0.216288
193.03	0.418758	0.386634	0.309064	0.293252	0.216092
193.23	0.418929	0.387056	0.309187	0.293438	0.216565
193.43	0.419146	0.387395	0.30959	0.293317	0.216885
193.63	0.419592	0.387403	0.309553	0.293495	0.216876
193.83	0.419772	0.387316	0.309692	0.293607	0.216295
194.03	0.419867	0.38716	0.309797	0.293931	0.215985
194.23	0.419834	0.387417	0.310109	0.293755	0.215965
194.43	0.419919	0.387305	0.310412	0.294474	0.215749
194.63	0.42041	0.387772	0.310932	0.294919	0.215937
194.83	0.420258	0.388011	0.310932	0.295009	0.215833
195.03	0.420871	0.388482	0.31168	0.295556	0.216473
195.23	0.421106	0.388734	0.311981	0.295903	0.216584
195.43	0.421193	0.388681	0.311892	0.296004	0.216225
195.63	0.421534	0.389051	0.312283	0.296335	0.216822
195.83	0.422413	0.389859	0.312293	0.296894	0.217645
196.03	0.42282	0.390103	0.312559	0.297236	0.218126
196.23	0.42298	0.389933	0.312082	0.297419	0.218068
196.43	0.423364	0.39045	0.312203	0.297944	0.218903
196.63	0.423908	0.390461	0.312279	0.298289	0.218947
196.83	0.424532	0.390717	0.31241	0.298465	0.219307
197.03	0.424734	0.39123	0.312394	0.297963	0.219569
197.23	0.424975	0.391367	0.312236	0.297582	0.219728
197.43	0.425122	0.391723	0.312404	0.297306	0.219642
197.63	0.424909	0.391614	0.311908	0.296819	0.219214
197.83	0.424797	0.391491	0.312044	0.296887	0.219073
198.03	0.42527	0.391807	0.312197	0.297169	0.219116
198.23	0.425038	0.391881	0.312409	0.297324	0.219155
198.43	0.425226	0.39216	0.312735	0.297696	0.219144
198.63	0.425116	0.392603	0.312972	0.298021	0.219372
198.83	0.425219	0.392895	0.31337	0.298587	0.219543
199.03	0.425556	0.393405	0.31435	0.299169	0.21941
199.23	0.425593	0.393513	0.314483	0.299523	0.219483
199.43	0.426127	0.393457	0.314334	0.299648	0.219665
199.63	0.426992	0.394271	0.314834	0.300598	0.220524
199.83	0.427361	0.394578	0.315267	0.301414	0.220926
200.03	0.427925	0.394986	0.315817	0.302382	0.22131
200.23	0.428667	0.395541	0.315893	0.30343	0.221689
200.43	0.429456	0.396302	0.31671	0.304325	0.222421
200.63	0.430467	0.396837	0.317354	0.305096	0.223043
200.83	0.430742	0.396985	0.317223	0.305104	0.223287
201.03	0.43081	0.397809	0.31774	0.305065	0.223715
201.23	0.430549	0.397927	0.317383	0.304803	0.223547
201.43	0.430979	0.3987	0.317707	0.305009	0.224246
201.63	0.430611	0.398228	0.31744	0.305015	0.223971
201.83	0.430774	0.398315	0.318132	0.305962	0.224715
202.03	0.430483	0.398625	0.31822	0.306266	0.22482
202.23	0.430045	0.398583	0.31866	0.305972	0.224626
202.43	0.430054	0.398637	0.31878	0.305479	0.224566
202.63	0.430079	0.39873	0.318971	0.305799	0.224356
202.83	0.430646	0.399101	0.319535	0.305453	0.22433
203.03	0.430425	0.398789	0.31965	0.304654	0.223749
203.23	0.430137	0.398645	0.319506	0.304242	0.223698
203.43	0.430769	0.398972	0.319816	0.304425	0.223598
203.63	0.430802	0.399528	0.320253	0.304789	0.223766
203.83	0.430591	0.399395	0.320386	0.305066	0.223974
204.03	0.430954	0.399621	0.320368	0.305388	0.224028
204.23	0.43136	0.400176	0.320333	0.305627	0.224182
204.43	0.432299	0.40069	0.321098	0.305997	0.224831
204.63	0.432472	0.400743	0.320944	0.30565	0.224719
204.83	0.432114	0.400632	0.320398	0.305571	0.224451
205.03	0.432509	0.401193	0.320584	0.30633	0.225036
205.23	0.43228	0.401302	0.319938	0.306294	0.225118
205.43	0.432652	0.401476	0.320273	0.306958	0.225655
205.63	0.432414	0.401239	0.320146	0.30745	0.225726
205.83	0.432981	0.401787	0.320892	0.308366	0.226917
206.03	0.433569	0.402196	0.321188	0.308859	0.227444
206.23	0.433953	0.401853	0.321469	0.30847	0.227718
206.43	0.434097	0.401794	0.32143	0.308479	0.227917
206.63	0.43476	0.402406	0.321854	0.309251	0.228302
206.83	0.434922	0.402237	0.321952	0.308549	0.228368
207.03	0.435198	0.402691	0.322361	0.309215	0.228429
207.23	0.435809	0.40354	0.322838	0.310164	0.22908
207.43	0.436624	0.404043	0.323887	0.311039	0.229756
207.63	0.436381	0.404001	0.323937	0.311144	0.230115
207.83	0.436531	0.404129	0.324441	0.310847	0.230243
208.03	0.43723	0.404518	0.325183	0.310922	0.230381
208.23	0.437746	0.404874	0.325895	0.311253	0.23073
208.43	0.438204	0.405048	0.326536	0.310982	0.230898
208.63	0.4377	0.405012	0.326173	0.310197	0.230155
208.83	0.437479	0.405118	0.325988	0.310385	0.229967
209.03	0.437487	0.404798	0.325847	0.309696	0.229314
209.23	0.43737	0.405145	0.326106	0.309769	0.229481
209.43	0.437893	0.405381	0.32622	0.310143	0.22949
209.63	0.438232	0.405696	0.32639	0.31064	0.229733
209.83	0.439274	0.406034	0.326933	0.311466	0.230302
210.03	0.438926	0.406029	0.326474	0.31128	0.229857
210.23	0.439103	0.406393	0.326772	0.311714	0.230191
210.43	0.438887	0.406816	0.326485	0.312032	0.230288
210.63	0.439027	0.407385	0.32661	0.312796	0.230697
210.83	0.439275	0.407455	0.326502	0.313059	0.231065
211.03	0.439454	0.408276	0.326814	0.313914	0.23167
211.23	0.439384	0.408273	0.326499	0.314292	0.231858
211.43	0.439238	0.408415	0.326809	0.314142	0.2319
211.63	0.438803	0.407825	0.326253	0.313737	0.231378
211.83	0.439037	0.408087	0.326804	0.313676	0.231409
212.03	0.439005	0.408131	0.326682	0.313893	0.231128
212.23	0.438953	0.408264	0.326828	0.313882	0.230812
212.43	0.43899	0.408364	0.326798	0.31364	0.230644
212.63	0.439207	0.408665	0.32681	0.313564	0.230342
212.83	0.43935	0.408904	0.326952	0.313946	0.230283
213.03	0.440206	0.408867	0.327499	0.314231	0.230345
213.23	0.441043	0.409728	0.328162	0.31549	0.23135
213.43	0.442063	0.410399	0.328454	0.315942	0.231824
213.63	0.442769	0.410821	0.329349	0.316739	0.232704
213.83	0.443643	0.411494	0.329903	0.317117	0.233275
214.03	0.443679	0.412012	0.329942	0.317302	0.233174
214.23	0.444593	0.412972	0.331013	0.31838	0.234301
214.43	0.444851	0.413398	0.331171	0.318259	0.234774
214.63	0.445116	0.413687	0.331385	0.318653	0.235226
214.83	0.44612	0.414183	0.331697	0.318908	0.236072
215.03	0.4463	0.4147	0.332079	0.319008	0.23649
215.23	0.446261	0.414544	0.332268	0.319051	0.236296
215.43	0.445874	0.413705	0.33222	0.317924	0.235794
215.63	0.445808	0.413525	0.332087	0.31799	0.235928
215.83	0.445298	0.413441	0.331994	0.317706	0.235879
216.03	0.445388	0.413215	0.331945	0.317467	0.235692
216.23	0.445453	0.413375	0.332016	0.317299	0.235835
216.43	0.445693	0.413625	0.332176	0.317559	0.235809
216.63	0.445761	0.413866	0.332098	0.317631	0.23586
216.83	0.445932	0.413959	0.332666	0.318088	0.236372
217.03	0.446401	0.414185	0.333172	0.318388	0.236521
217.23	0.446058	0.414335	0.333246	0.318754	0.237118
217.43	0.446526	0.414668	0.333679	0.319398	0.237586
217.63	0.446331	0.414615	0.334064	0.31976	0.237852
217.83	0.446215	0.414479	0.333818	0.319614	0.237245
218.03	0.445941	0.414635	0.333555	0.319788	0.237215
218.23	0.44578	0.414907	0.333469	0.320245	0.237256
218.43	0.446281	0.415303	0.33343	0.320633	0.23732
218.63	0.446635	0.414972	0.333403	0.321007	0.237532
218.83	0.447084	0.414855	0.333345	0.321088	0.237661
219.03	0.447216	0.415486	0.333723	0.321793	0.238161
219.23	0.44721	0.414976	0.333812	0.321616	0.238042
219.43	0.447648	0.41529	0.333836	0.321658	0.238176
219.63	0.448334	0.415943	0.334079	0.322813	0.23866
219.83	0.44874	0.416211	0.334372	0.323118	0.238817
220.03	0.449601	0.416873	0.334937	0.323227	0.239224
220.23	0.449669	0.417615	0.334941	0.323441	0.238944
220.43	0.450966	0.418235	0.335587	0.324429	0.239474
220.63	0.451126	0.418361	0.335475	0.324479	0.239823
220.83	0.451857	0.419087	0.336601	0.325468	0.240371
221.03	0.452014	0.419755	0.337198	0.325892	0.240245
221.23	0.451753	0.419969	0.337599	0.326525	0.240459
221.43	0.452262	0.420424	0.338029	0.327111	0.240769
221.63	0.451803	0.420393	0.33823	0.326536	0.240489
221.83	0.451591	0.420462	0.338177	0.32659	0.240475
222.03	0.45173	0.420733	0.338397	0.326859	0.240921
222.23	0.451085	0.420251	0.338435	0.326383	0.240608
222.43	0.451212	0.420506	0.338797	0.326224	0.240672
222.63	0.45146	0.420392	0.33918	0.325993	0.241001
222.83	0.451085	0.420205	0.339163	0.325591	0.240878
223.03	0.450932	0.420485	0.339314	0.325614	0.240863
223.23	0.450899	0.420329	0.339606	0.325448	0.24065
223.43	0.450881	0.420917	0.340031	0.325668	0.240598
223.63	0.450608	0.421082	0.340123	0.325779	0.240429
223.83	0.450811	0.422111	0.340601	0.326411	0.240933
224.03	0.450925	0.422289	0.340733	0.326608	0.241401
224.23	0.450842	0.422743	0.340377	0.327076	0.241338
224.43	0.451798	0.423175	0.34083	0.32797	0.241805
224.63	0.451471	0.423332	0.340559	0.327743	0.241321
224.83	0.451901	0.423836	0.341129	0.328348	0.241663
225.03	0.451761	0.424016	0.340869	0.32811	0.241031
225.23	0.451932	0.424149	0.340573	0.328361	0.241282
225.43	0.452221	0.423849	0.340326	0.328484	0.241658
225.63	0.452961	0.424376	0.340451	0.328567	0.241978
225.83	0.453355	0.424277	0.340511	0.32882	0.242594
226.03	0.453308	0.423484	0.340409	0.328724	0.24259
226.23	0.453233	0.423036	0.340256	0.328248	0.242474
226.43	0.453728	0.423181	0.340711	0.328546	0.242691
226.63	0.454126	0.422572	0.340782	0.328421	0.242644
226.83	0.453849	0.422094	0.340376	0.327783	0.242288
227.03	0.453688	0.422048	0.340313	0.327849	0.242418
227.23	0.454076	0.42274	0.341216	0.328153	0.243117
227.43	0.454288	0.423219	0.341946	0.328505	0.24361
227.63	0.454812	0.423679	0.342503	0.329307	0.243991
227.83	0.455206	0.424579	0.342783	0.330027	0.24453
228.03	0.455285	0.424506	0.343018	0.329971	0.244321
228.23	0.455447	0.425302	0.343416	0.330379	0.244272
228.43	0.45615	0.425565	0.3439	0.33058	0.244453
228.63	0.456412	0.426195	0.344162	0.33074	0.24492
228.83	0.456746	0.426683	0.344429	0.331064	0.245163
229.03	0.457018	0.427361	0.344725	0.33179	0.245137
229.23	0.457204	0.428005	0.345214	0.332446	0.245795
229.43	0.457685	0.428648	0.345683	0.332944	0.246129
229.63	0.458342	0.429344	0.346406	0.333521	0.246415
229.83	0.457966	0.429252	0.346584	0.333509	0.246718
230.03	0.457596	0.429264	0.34644	0.333722	0.246864
230.23	0.458571	0.430059	0.346622	0.334338	0.247237
230.43	0.458346	0.429748	0.346338	0.334042	0.247157
230.63	0.458398	0.429917	0.346098	0.334049	0.247001
230.83	0.45831	0.430073	0.345864	0.334196	0.247158
231.03	0.458488	0.430187	0.346371	0.33486	0.247327
231.23	0.45891	0.430413	0.346584	0.33526	0.247863
231.43	0.459136	0.430585	0.346495	0.335869	0.248272
231.63	0.459278	0.429961	0.346035	0.335401	0.247613
231.83	0.459424	0.430275	0.345912	0.335483	0.2476
232.03	0.459691	0.430055	0.346336	0.335965	0.247703
232.23	0.460066	0.429987	0.346504	0.336352	0.248072
232.43	0.460023	0.429917	0.346625	0.336415	0.248147
232.63	0.460322	0.430357	0.34685	0.336849	0.248013
232.83	0.460314	0.430277	0.347078	0.336981	0.247698
233.03	0.460654	0.43065	0.34748	0.337175	0.248013
233.23	0.460204	0.430376	0.347646	0.337057	0.247835
233.43	0.460702	0.430558	0.348129	0.336916	0.248083
233.63	0.461356	0.430644	0.349041	0.337297	0.248273
233.83	0.461704	0.431284	0.349687	0.336983	0.248949
234.03	0.462333	0.431929	0.350241	0.337207	0.249142
234.23	0.462662	0.432379	0.350632	0.337437	0.249348
234.43	0.462548	0.432422	0.350907	0.337467	0.249483
234.63	0.463147	0.433477	0.351658	0.337845	0.250118
234.83	0.463669	0.433685	0.351867	0.338261	0.250499
235.03	0.464467	0.434109	0.352479	0.338687	0.251003
235.23	0.465015	0.434917	0.352901	0.339011	0.252202
235.43	0.465204	0.435119	0.352578	0.338932	0.252016
235.63	0.464982	0.434708	0.352537	0.338859	0.251584
235.83	0.46525	0.435214	0.352823	0.339941	0.252205
236.03	0.464936	0.435277	0.352824	0.340231	0.252358
236.23	0.464524	0.435241	0.352641	0.340246	0.251936
236.43	0.464246	0.4357	0.353102	0.34062	0.251797
236.63	0.464149	0.43544	0.352585	0.340608	0.251387
236.83	0.46391	0.435084	0.352516	0.340982	0.251648
237.03	0.46349	0.435081	0.35257	0.341156	0.251514
237.23	0.463177	0.434725	0.352988	0.34136	0.251413
237.43	0.463892	0.435	0.353508	0.341045	0.25163
237.63	0.46422	0.435383	0.354204	0.341101	0.251689
237.83	0.464203	0.435882	0.354754	0.340803	0.252005
238.03	0.463893	0.435848	0.354312	0.340517	0.251957
238.23	0.463975	0.435764	0.354063	0.340704	0.252216
238.43	0.46516	0.436408	0.354182	0.340842	0.252576
238.63	0.465692	0.437059	0.354171	0.340199	0.252802
238.83	0.466409	0.437345	0.354388	0.340254	0.253254
239.03	0.467098	0.438248	0.354998	0.34056	0.253932
239.23	0.467505	0.438612	0.355043	0.340647	0.254391
239.43	0.468008	0.43872	0.354792	0.341105	0.254471
239.63	0.467902	0.438891	0.354989	0.34184	0.254722
239.83	0.468444	0.43951	0.355214	0.342583	0.255779
240.03	0.46855	0.439914	0.355817	0.343258	0.256377
240.23	0.468908	0.440209	0.356439	0.344023	0.256523
240.43	0.469062	0.4403	0.356785	0.345133	0.256945
240.63	0.46911	0.440246	0.356542	0.34587	0.257478
240.83	0.46906	0.440386	0.356821	0.346726	0.257816
241.03	0.469037	0.440753	0.357181	0.347187	0.257663
241.23	0.468978	0.440614	0.357086	0.3467	0.257747
241.43	0.469086	0.440598	0.356683	0.346302	0.257491
241.63	0.469224	0.441426	0.356882	0.346827	0.25783
241.83	0.469074	0.441664	0.356741	0.346883	0.25789
242.03	0.469087	0.44183	0.356358	0.346958	0.257966
242.23	0.469714	0.442558	0.356563	0.347567	0.258131
242.43	0.469949	0.442955	0.356719	0.34729	0.258037
242.63	0.469714	0.442915	0.356471	0.346604	0.257647
242.83	0.46989	0.442797	0.356383	0.346855	0.257732
243.03	0.469849	0.442841	0.356608	0.346647	0.257829
243.23	0.469374	0.441871	0.356141	0.34569	0.257262
243.43	0.469582	0.441907	0.356396	0.345747	0.257428
243.63	0.469266	0.44168	0.356667	0.345755	0.257242
243.83	0.46935	0.441383	0.356903	0.346124	0.257167
244.03	0.469126	0.440814	0.357279	0.346436	0.256781
244.23	0.469516	0.440796	0.357601	0.346957	0.256843
244.43	0.469751	0.441037	0.35824	0.347897	0.257244
244.63	0.469698	0.441108	0.358273	0.348134	0.257219
244.83	0.469679	0.441691	0.358811	0.348591	0.257397
245.03	0.470023	0.441802	0.358756	0.348837	0.257389
245.23	0.469895	0.441959	0.358571	0.348627	0.257439
245.43	0.470531	0.442468	0.358898	0.349384	0.258198
245.63	0.470842	0.443264	0.35898	0.350129	0.258754
245.83	0.471057	0.44356	0.358951	0.350382	0.258817
246.03	0.471188	0.443673	0.358747	0.350349	0.259014
246.23	0.47132	0.443679	0.358652	0.350447	0.259252
246.43	0.471516	0.443801	0.35868	0.350542	0.259399
246.63	0.471807	0.44372	0.358435	0.350179	0.259397
246.83	0.471733	0.443913	0.358176	0.350165	0.259746
247.03	0.47197	0.443964	0.358677	0.349639	0.260083
247.23	0.472209	0.443931	0.358957	0.349866	0.26042
247.43	0.47299	0.44432	0.359513	0.350597	0.260986
247.63	0.473109	0.444379	0.35982	0.350997	0.260812
247.83	0.474032	0.445085	0.360813	0.351623	0.261347
248.03	0.474378	0.445736	0.361717	0.351965	0.262149
248.23	0.475494	0.446711	0.362932	0.352915	0.26318
248.43	0.475946	0.44712	0.363559	0.353185	0.263412
248.63	0.476544	0.447595	0.364039	0.353647	0.264118
248.83	0.477514	0.448661	0.364905	0.354477	0.264928
249.03	0.478198	0.448657	0.365509	0.355211	0.265268
249.23	0.478309	0.448892	0.365812	0.355274	0.26525
249.43	0.479108	0.449054	0.366122	0.355746	0.265764
249.63	0.479296	0.449212	0.366089	0.35569	0.265488
249.83	0.479353	0.449156	0.366096	0.355679	0.265259
250.03	0.478869	0.448865	0.365919	0.355106	0.264927
250.23	0.479218	0.449164	0.366214	0.355595	0.265297
250.43	0.478975	0.449245	0.365788	0.355455	0.26502
250.63	0.479049	0.448767	0.365631	0.354675	0.264694
250.83	0.478259	0.448324	0.364963	0.354476	0.264489
251.03	0.478152	0.447919	0.365069	0.354442	0.264115
251.23	0.477546	0.447786	0.364944	0.354896	0.264038
251.43	0.477419	0.447533	0.364843	0.354853	0.263895
251.63	0.477052	0.4474	0.364324	0.35437	0.26394
251.83	0.477738	0.448202	0.364945	0.354526	0.264372
252.03	0.47786	0.448334	0.365218	0.354715	0.264495
252.23	0.478179	0.448585	0.365579	0.354893	0.264846
252.43	0.479188	0.44897	0.366074	0.355046	0.265547
252.63	0.480119	0.44934	0.366884	0.355628	0.266377
252.83	0.480382	0.449586	0.367086	0.355858	0.266119
253.03	0.48058	0.449852	0.367747	0.356001	0.266393
253.23	0.481052	0.450411	0.368136	0.356118	0.26635
253.43	0.481235	0.45052	0.36833	0.35587	0.266467
253.63	0.48151	0.450736	0.368646	0.356352	0.266623
253.83	0.481673	0.450861	0.36869	0.356631	0.266762
254.03	0.482098	0.451348	0.369231	0.357161	0.266939
254.23	0.482632	0.451903	0.369546	0.357691	0.267241
254.43	0.482313	0.451938	0.369543	0.357578	0.267118
254.63	0.482252	0.452395	0.369981	0.357721	0.267313
254.83	0.481453	0.452563	0.369479	0.357841	0.267091
255.03	0.481158	0.452919	0.369512	0.357872	0.267011
255.23	0.480833	0.453222	0.369519	0.358128	0.267715
255.43	0.481268	0.453544	0.369677	0.358081	0.268204
255.63	0.480621	0.453591	0.3689	0.357276	0.267641
255.83	0.480923	0.453892	0.369073	0.35726	0.267382
256.03	0.480937	0.453654	0.369242	0.357351	0.267433
256.23	0.481177	0.453754	0.369355	0.357376	0.267654
256.43	0.481921	0.453624	0.36938	0.357286	0.267696
256.63	0.481137	0.453018	0.368819	0.356885	0.267469
256.83	0.480938	0.452958	0.368162	0.356368	0.266997
257.03	0.480804	0.452858	0.367902	0.356351	0.267053
257.23	0.481204	0.452684	0.36805	0.356866	0.267139
257.43	0.480959	0.451927	0.367772	0.356898	0.267017
257.63	0.481701	0.451594	0.367717	0.357848	0.267226
257.83	0.482481	0.452451	0.368214	0.358906	0.267945
258.03	0.483047	0.452915	0.368892	0.359641	0.268607
258.23	0.483203	0.453565	0.368955	0.359939	0.268855
258.43	0.48306	0.454193	0.369341	0.360204	0.269386
258.63	0.483063	0.455311	0.369694	0.360458	0.27003
258.83	0.483503	0.455604	0.369743	0.360315	0.270405
259.03	0.484003	0.456028	0.37071	0.36081	0.271186
259.23	0.484192	0.456491	0.37094	0.360994	0.271455
259.43	0.484619	0.456641	0.371343	0.361268	0.271476
259.63	0.484735	0.456845	0.371559	0.361586	0.271471
259.83	0.485269	0.456759	0.371888	0.362055	0.271505
260.03	0.485365	0.456349	0.372126	0.36201	0.27127
260.23	0.485525	0.456632	0.372662	0.361736	0.271438
260.43	0.485302	0.456998	0.37297	0.361612	0.271471
260.63	0.484914	0.456875	0.372888	0.36124	0.271609
260.83	0.485398	0.457375	0.373055	0.361753	0.271799
261.03	0.485187	0.456987	0.372971	0.361742	0.271281
261.23	0.485444	0.457139	0.373607	0.361808	0.27159
261.43	0.484692	0.456689	0.373256	0.361529	0.27114
261.63	0.484403	0.456596	0.373253	0.361283	0.270538
261.83	0.484256	0.457432	0.373599	0.361668	0.270943
262.03	0.484364	0.457699	0.373663	0.361527	0.271266
262.23	0.48434	0.457881	0.373636	0.361804	0.270938
262.43	0.48476	0.458342	0.373872	0.36213	0.271135
262.63	0.485283	0.458411	0.373817	0.362641	0.271574
262.83	0.485323	0.457803	0.373706	0.362851	0.271665
263.03	0.485157	0.457868	0.374178	0.363688	0.271761
263.23	0.485465	0.458378	0.374267	0.364481	0.27219
263.43	0.486134	0.458328	0.374483	0.365185	0.272527
263.63	0.486566	0.458778	0.374884	0.36561	0.27262
263.83	0.486471	0.458402	0.374449	0.365567	0.272336
264.03	0.48686	0.458548	0.374783	0.365882	0.272435
264.23	0.487077	0.459212	0.375421	0.366169	0.272757
264.43	0.48779	0.46008	0.376155	0.36676	0.273709
264.63	0.488062	0.460315	0.37587	0.366565	0.274067
264.83	0.488323	0.460711	0.375902	0.366869	0.274176
265.03	0.488361	0.460733	0.375882	0.366193	0.273879
265.23	0.488202	0.460928	0.376258	0.366373	0.274652
265.43	0.487995	0.460354	0.375706	0.365808	0.273966
265.63	0.488507	0.46081	0.376	0.365649	0.273851
265.83	0.488778	0.461229	0.376026	0.366043	0.274378
266.03	0.489595	0.461234	0.376035	0.366221	0.274646
266.23	0.489944	0.46108	0.376259	0.366655	0.274579
266.43	0.490345	0.46167	0.376153	0.366809	0.274579
266.63	0.489982	0.461419	0.376161	0.366817	0.27457
266.83	0.489297	0.461069	0.375936	0.366526	0.274118
267.03	0.48975	0.461504	0.376139	0.366618	0.273901
267.23	0.490225	0.461914	0.376724	0.36718	0.274121
267.43	0.49026	0.462251	0.376742	0.367082	0.273886
267.63	0.490034	0.462426	0.376858	0.367243	0.273538
267.83	0.490162	0.462523	0.376811	0.367618	0.273985
268.03	0.490298	0.462295	0.377305	0.367434	0.273848
268.23	0.490247	0.46267	0.37789	0.367653	0.273745
268.43	0.490883	0.463433	0.378405	0.368267	0.274546
268.63	0.490355	0.463337	0.377764	0.368013	0.273895
268.83	0.489976	0.463121	0.377985	0.368225	0.273942
269.03	0.490101	0.464005	0.378782	0.368558	0.274963
269.23	0.490116	0.464055	0.37915	0.368391	0.275595
269.43	0.490397	0.463981	0.379367	0.368043	0.275402
269.63	0.4907	0.464857	0.379776	0.368609	0.2763
269.83	0.491292	0.465369	0.380218	0.369311	0.276903
270.03	0.492354	0.465853	0.380621	0.37016	0.277735
270.23	0.492826	0.466617	0.381536	0.370908	0.278198
270.43	0.49302	0.467467	0.381662	0.371247	0.278635
270.63	0.493199	0.467476	0.381847	0.371373	0.279151
270.83	0.49368	0.467194	0.381739	0.371423	0.278896
271.03	0.494319	0.467534	0.38216	0.371565	0.279264
271.23	0.494797	0.468013	0.382661	0.372034	0.279959
271.43	0.495055	0.467891	0.382408	0.37179	0.279866
271.63	0.494991	0.467835	0.382507	0.372137	0.279999
271.83	0.495089	0.467442	0.382427	0.371935	0.280126
272.03	0.495452	0.467109	0.382677	0.371976	0.279799
272.23	0.495897	0.467676	0.382804	0.372849	0.279722
272.43	0.49538	0.467521	0.382321	0.372504	0.279768
272.63	0.494823	0.466824	0.381965	0.371905	0.279257
272.83	0.495543	0.467502	0.38275	0.372487	0.280081
273.03	0.495616	0.467934	0.38312	0.372396	0.280235
273.23	0.495767	0.467574	0.383075	0.372012	0.280036
273.43	0.496112	0.467863	0.383463	0.372547	0.279989
273.63	0.49688	0.468615	0.3839	0.373552	0.280527
273.83	0.497418	0.469387	0.384428	0.374076	0.280862
274.03	0.497464	0.469738	0.384623	0.374496	0.281055
274.23	0.497355	0.469952	0.384956	0.375143	0.28086
274.43	0.497551	0.470163	0.384646	0.375377	0.281394
274.63	0.497588	0.469731	0.384386	0.375659	0.281053
274.83	0.497725	0.469812	0.384153	0.375554	0.280867
275.03	0.497423	0.470122	0.384047	0.375557	0.281183
275.23	0.497596	0.470396	0.384225	0.375845	0.281382
275.43	0.497549	0.470582	0.384078	0.376318	0.280776
275.63	0.497358	0.471218	0.384415	0.376837	0.281053
275.83	0.497427	0.470994	0.384132	0.376664	0.28081
276.03	0.497824	0.471102	0.384172	0.376992	0.281159
276.23	0.49819	0.471442	0.384128	0.377034	0.281265
276.43	0.498144	0.471428	0.384326	0.376837	0.281439
276.63	0.499378	0.471597	0.384997	0.377242	0.281848
276.83	0.499784	0.4723	0.385384	0.377705	0.28217
277.03	0.499308	0.471792	0.385695	0.37718	0.281933
277.23	0.499995	0.472148	0.386425	0.377456	0.28208
277.43	0.500663	0.473177	0.387231	0.377878	0.283021
277.63	0.501518	0.474043	0.388185	0.378369	0.283926
277.83	0.501591	0.474822	0.388466	0.378208	0.284544
278.03	0.501845	0.474738	0.388421	0.378101	0.284413
278.23	0.502002	0.475029	0.388517	0.378281	0.284696
278.43	0.502383	0.474998	0.388478	0.37788	0.28514
278.63	0.502326	0.475292	0.38855	0.378185	0.285497
278.83	0.502711	0.475814	0.388684	0.378372	0.286159
279.03	0.502731	0.476229	0.388984	0.378844	0.286681
279.23	0.503292	0.476276	0.38931	0.379287	0.286822
279.43	0.503285	0.476511	0.389431	0.37997	0.286574
279.63	0.503533	0.476667	0.389317	0.38022	0.286755
279.83	0.50357	0.476602	0.389451	0.380807	0.286947
280.03	0.503749	0.476345	0.389052	0.380796	0.286877
280.23	0.503645	0.476239	0.389237	0.381103	0.286741
280.43	0.502568	0.475485	0.388971	0.380828	0.286191
280.63	0.502805	0.475269	0.389172	0.38094	0.28594
280.83	0.50212	0.474869	0.38896	0.380823	0.285311
281.03	0.502198	0.474609	0.389316	0.38094	0.285431
281.23	0.502296	0.475269	0.389607	0.381554	0.28551
281.43	0.502968	0.476268	0.39041	0.382202	0.286504
281.63	0.503474	0.476822	0.391111	0.382324	0.286635
281.83	0.502736	0.476607	0.390847	0.381906	0.286429
282.03	0.503187	0.4769	0.39086	0.381516	0.286441
282.23	0.503602	0.477554	0.391261	0.381581	0.286972
282.43	0.504057	0.47749	0.39122	0.381501	0.287538
282.63	0.504576	0.478332	0.391249	0.382129	0.288482
282.83	0.505729	0.478465	0.391065	0.382218	0.288829
283.03	0.506148	0.478746	0.391322	0.382224	0.289183
283.23	0.506721	0.478829	0.391602	0.382614	0.289476
283.43	0.506951	0.479352	0.392249	0.383117	0.289485
283.63	0.507355	0.479875	0.392006	0.383094	0.289818
283.83	0.507658	0.479932	0.392465	0.383187	0.290051
284.03	0.507879	0.479863	0.392469	0.383234	0.290009
284.23	0.507327	0.479928	0.392637	0.383378	0.289907
284.43	0.507441	0.479937	0.392564	0.383106	0.289517
284.63	0.507801	0.480085	0.392848	0.383384	0.289511
284.83	0.507585	0.479959	0.393149	0.383697	0.289353
285.03	0.507818	0.480708	0.393808	0.384654	0.290125
285.23	0.507203	0.480718	0.393982	0.384844	0.289643
285.43	0.507242	0.480782	0.394118	0.385344	0.289916
285.63	0.506325	0.480925	0.394028	0.385192	0.289668
285.83	0.505577	0.480897	0.393788	0.385301	0.2897
286.03	0.505728	0.481085	0.393761	0.385331	0.289922
286.23	0.50547	0.480868	0.393624	0.385263	0.289819
286.43	0.505473	0.480653	0.393456	0.385514	0.289693
286.63	0.505692	0.480614	0.393232	0.385915	0.28968
286.83	0.506123	0.480691	0.393284	0.38609	0.289785
287.03	0.505641	0.480765	0.393695	0.386207	0.290045
287.23	0.505571	0.481129	0.393984	0.386415	0.290278
287.43	0.506013	0.481404	0.394316	0.386269	0.290074
287.63	0.506823	0.481596	0.394616	0.386188	0.290424
287.83	0.507967	0.481861	0.395158	0.387041	0.290736
288.03	0.508043	0.482176	0.395283	0.38731	0.291206
288.23	0.50834	0.4824	0.395087	0.387136	0.291394
288.43	0.5091	0.482345	0.395431	0.387408	0.291972
288.63	0.509653	0.482457	0.395668	0.387848	0.292552
288.83	0.510098	0.482985	0.395936	0.388265	0.292745
289.03	0.510331	0.483321	0.396098	0.388596	0.293075
289.23	0.510348	0.48352	0.395881	0.388382	0.292792
289.43	0.510865	0.484148	0.396275	0.389048	0.293378
289.63	0.510951	0.484797	0.396548	0.389059	0.293851
289.83	0.511662	0.484849	0.397296	0.389321	0.294426
290.03	0.511649	0.484482	0.397122	0.389445	0.294304
290.23	0.512228	0.484974	0.397426	0.390227	0.29452
290.43	0.512108	0.485199	0.397911	0.391155	0.294901
290.63	0.511775	0.485658	0.39854	0.391319	0.295026
290.83	0.511577	0.486301	0.398925	0.391874	0.295182
291.03	0.510807	0.486718	0.399306	0.391807	0.295115
291.23	0.511166	0.487417	0.399556	0.392019	0.29518
291.43	0.511459	0.487489	0.399822	0.39191	0.294478
291.63	0.511466	0.487713	0.400225	0.392204	0.294471
291.83	0.510838	0.487514	0.39978	0.392288	0.294332
292.03	0.510744	0.487733	0.399855	0.391737	0.294335
292.23	0.511158	0.48783	0.400067	0.392139	0.2948
292.43	0.511765	0.487746	0.40002	0.392412	0.294939
292.63	0.511958	0.487613	0.399595	0.392274	0.294667
292.83	0.511666	0.487547	0.399023	0.391789	0.29401
293.03	0.512229	0.487221	0.398883	0.391688	0.293922
293.23	0.512788	0.487201	0.398993	0.391695	0.294449
293.43	0.512898	0.486646	0.399171	0.391736	0.294646
293.63	0.513219	0.486455	0.399252	0.391565	0.294803
293.83	0.513778	0.486717	0.399849	0.392015	0.295301
294.03	0.513448	0.486727	0.399416	0.392422	0.295572
294.23	0.513817	0.48691	0.400251	0.393344	0.296307
294.43	0.513604	0.486474	0.400378	0.393166	0.296283
294.63	0.513677	0.486743	0.400763	0.393004	0.29602
294.83	0.513822	0.486886	0.400311	0.393174	0.296178
295.03	0.513744	0.487106	0.400609	0.393162	0.296275
295.23	0.514299	0.486819	0.400323	0.393082	0.296161
295.43	0.514314	0.487055	0.400636	0.393161	0.295758
295.63	0.51416	0.487417	0.400448	0.393221	0.29608
295.83	0.513798	0.48763	0.400484	0.393059	0.295941
296.03	0.514405	0.488395	0.400747	0.393437	0.296201
296.23	0.514634	0.488974	0.400612	0.394059	0.296677
296.43	0.514978	0.488999	0.400248	0.393785	0.296559
296.63	0.514732	0.489191	0.400283	0.393931	0.296717
296.83	0.515136	0.489674	0.400645	0.394308	0.296957
297.03	0.515834	0.490086	0.401414	0.394908	0.297727
297.23	0.51578	0.490161	0.402072	0.394707	0.297853
297.43	0.51614	0.490757	0.402786	0.395368	0.29805
297.63	0.516653	0.491333	0.403111	0.395901	0.298568
297.83	0.516452	0.491771	0.403416	0.396455	0.29929
298.03	0.516537	0.49194	0.403902	0.396962	0.299879
298.23	0.517124	0.491658	0.404385	0.397076	0.300101
298.43	0.517637	0.491398	0.404226	0.396818	0.299892
298.63	0.518164	0.491613	0.404385	0.397013	0.300129
298.83	0.518339	0.491785	0.404317	0.397196	0.300489
299.03	0.518188	0.491577	0.404247	0.39704	0.300249
299.23	0.518322	0.491436	0.403695	0.397158	0.300212
299.43	0.518327	0.492031	0.403962	0.397722	0.30062
299.63	0.518259	0.492033	0.403674	0.398074	0.300496
299.83	0.518234	0.492282	0.40362	0.39815	0.300297
300.03	0.518721	0.492381	0.40291	0.398337	0.300111
300.23	0.519381	0.493063	0.403034	0.3987	0.300383
300.43	0.520032	0.493308	0.403469	0.398681	0.300589
300.63	0.520497	0.493374	0.403636	0.399078	0.300872
300.83	0.52128	0.494294	0.404381	0.39963	0.301537
301.03	0.521585	0.494645	0.404942	0.399671	0.301708
301.23	0.521315	0.494455	0.405134	0.399463	0.301306
301.43	0.521556	0.494819	0.405404	0.400303	0.301459
301.63	0.521702	0.495186	0.405466	0.40079	0.302034
301.83	0.521365	0.495291	0.405733	0.400576	0.302016
302.03	0.521676	0.495422	0.406211	0.400417	0.302095
302.23	0.521403	0.49488	0.406205	0.40011	0.301937
302.43	0.521527	0.495094	0.406657	0.400358	0.302809
302.63	0.521749	0.495963	0.407459	0.400923	0.303812
302.83	0.521502	0.496336	0.407978	0.401154	0.304359
303.03	0.521325	0.496472	0.4084	0.401364	0.304841
303.23	0.52188	0.496905	0.408796	0.402437	0.305832
303.43	0.521918	0.497283	0.409156	0.403054	0.306435
303.63	0.522421	0.497896	0.409597	0.403615	0.306895
303.83	0.52202	0.49788	0.409292	0.403384	0.306971
304.03	0.522178	0.49775	0.409234	0.40353	0.306539
304.23	0.522035	0.498429	0.409723	0.404095	0.306961
304.43	0.522499	0.498818	0.410301	0.404497	0.307201
304.63	0.522559	0.499003	0.410205	0.404837	0.307376
304.83	0.522585	0.499663	0.410584	0.405064	0.307494
305.03	0.522589	0.499618	0.410503	0.405126	0.306936
305.23	0.522413	0.499572	0.410469	0.405326	0.306261
305.43	0.522459	0.499532	0.409982	0.405234	0.305655
305.63	0.522925	0.499616	0.409979	0.405241	0.305488
305.83	0.522541	0.498991	0.409277	0.404161	0.304209
306.03	0.522712	0.498839	0.409117	0.403867	0.304401
306.23	0.522386	0.498481	0.409141	0.403369	0.304302
306.43	0.523205	0.498864	0.410003	0.403504	0.305057
306.63	0.523843	0.498773	0.410549	0.40384	0.305117
306.83	0.523931	0.498242	0.410188	0.403897	0.304771
307.03	0.524375	0.498493	0.410448	0.404504	0.305494
307.23	0.524984	0.498453	0.410576	0.404959	0.305954
307.43	0.52487	0.498507	0.41058	0.404791	0.305996
307.63	0.525369	0.49881	0.410762	0.405142	0.306316
307.83	0.525188	0.497954	0.41035	0.405054	0.306121
308.03	0.525314	0.498001	0.41044	0.405091	0.306101
308.23	0.525661	0.498634	0.410858	0.405989	0.306889
308.43	0.526197	0.498784	0.41094	0.406061	0.307032
308.63	0.526185	0.498918	0.41093	0.406263	0.307259
308.83	0.526509	0.499299	0.411068	0.406524	0.307454
309.03	0.526945	0.499646	0.411463	0.40726	0.307799
309.23	0.526682	0.500259	0.412092	0.407509	0.308041
309.43	0.526985	0.500459	0.411981	0.407367	0.308393
309.63	0.527593	0.501025	0.412461	0.407817	0.308706
309.83	0.527794	0.501442	0.412723	0.40798	0.309165
310.03	0.527913	0.501705	0.413291	0.408396	0.309696
310.23	0.527743	0.50168	0.413781	0.408239	0.309484
310.43	0.527728	0.501757	0.414008	0.408858	0.309311
310.63	0.527639	0.501424	0.414078	0.409136	0.309071
310.83	0.527385	0.501706	0.414226	0.409887	0.309138
311.03	0.527488	0.502032	0.414654	0.410199	0.30999
311.23	0.527621	0.502257	0.414938	0.41042	0.310184
311.43	0.527846	0.502194	0.414888	0.410411	0.309918
311.63	0.527977	0.502061	0.414551	0.410412	0.309796
311.83	0.527913	0.501824	0.414429	0.410284	0.309982
312.03	0.527731	0.502058	0.414568	0.410163	0.310192
312.23	0.527842	0.502223	0.414952	0.410486	0.310416
312.43	0.527877	0.502352	0.415273	0.410031	0.310492
312.63	0.528699	0.502886	0.415766	0.410285	0.310991
312.83	0.529547	0.503296	0.41631	0.410467	0.311353
313.03	0.530259	0.503608	0.416523	0.410391	0.311614
313.23	0.530777	0.504459	0.417064	0.410503	0.312018
313.43	0.531687	0.504594	0.416959	0.410637	0.312312
313.63	0.532121	0.505047	0.417345	0.411115	0.312487
313.83	0.532025	0.50526	0.417317	0.411324	0.312286
314.03	0.531261	0.505254	0.416692	0.410889	0.31167
314.23	0.531336	0.505349	0.416558	0.410877	0.312122
314.43	0.530462	0.505133	0.416089	0.410505	0.311589
314.63	0.530251	0.50505	0.416084	0.410229	0.311876
314.83	0.530041	0.505491	0.416496	0.410893	0.312464
315.03	0.529691	0.505508	0.416185	0.410395	0.312371
315.23	0.530068	0.505667	0.416537	0.411157	0.312678
315.43	0.530143	0.505381	0.416572	0.411194	0.312657
315.63	0.529662	0.505145	0.416231	0.411357	0.312722
315.83	0.530027	0.505408	0.416803	0.412204	0.313563
316.03	0.529788	0.505617	0.417325	0.412214	0.313811
316.23	0.53055	0.50606	0.418381	0.413074	0.314297
316.43	0.531449	0.506183	0.418811	0.412772	0.314404
316.63	0.532146	0.506416	0.418947	0.412936	0.314238
316.83	0.532257	0.506399	0.4194	0.413201	0.31436
317.03	0.532229	0.506054	0.418676	0.412978	0.313641
317.23	0.532054	0.506164	0.418968	0.413125	0.313417
317.43	0.531338	0.505572	0.418509	0.412374	0.312839
317.63	0.53131	0.505478	0.418757	0.41231	0.312204
317.83	0.530993	0.504791	0.418211	0.412041	0.31168
318.03	0.530443	0.50471	0.417671	0.41132	0.311755
318.23	0.530549	0.504607	0.417627	0.411319	0.312034
318.43	0.530037	0.504704	0.417515	0.411191	0.312042
318.63	0.530536	0.504908	0.417987	0.411633	0.312655
318.83	0.530841	0.505603	0.418411	0.412194	0.313177
319.03	0.531289	0.505693	0.41828	0.412503	0.313285
319.23	0.53195	0.505951	0.418613	0.413717	0.314253
319.43	0.532195	0.506156	0.418562	0.414279	0.314712
319.63	0.532386	0.506725	0.418785	0.415227	0.315271
319.83	0.533022	0.508006	0.419105	0.415824	0.315798
320.03	0.533353	0.508899	0.419633	0.416547	0.316185
320.23	0.533629	0.509288	0.419684	0.416969	0.316029
320.43	0.5336	0.509522	0.419196	0.416671	0.315853
320.63	0.533783	0.510267	0.41939	0.416919	0.315647
320.83	0.533655	0.510721	0.419713	0.417376	0.315757
321.03	0.533623	0.510492	0.419153	0.417272	0.31484
321.23	0.533799	0.511079	0.419535	0.416908	0.314579
321.43	0.533825	0.510581	0.419212	0.416016	0.313948
321.63	0.534701	0.510759	0.419632	0.416589	0.313948
321.83	0.534377	0.510365	0.419567	0.416508	0.313976
322.03	0.534053	0.510401	0.419529	0.416369	0.313848
322.23	0.534202	0.509945	0.419731	0.416653	0.31409
322.43	0.534118	0.509692	0.419727	0.416749	0.314343
322.63	0.534373	0.509438	0.420094	0.41694	0.314811
322.83	0.534392	0.509342	0.419814	0.417126	0.315038
323.03	0.534864	0.509332	0.420419	0.417118	0.315368
323.23	0.535197	0.509461	0.420808	0.417516	0.316265
323.43	0.535727	0.509852	0.421461	0.417995	0.316843
323.63	0.536271	0.510216	0.421973	0.418335	0.317201
323.83	0.536385	0.51027	0.421873	0.417979	0.316963
324.03	0.536898	0.510357	0.422463	0.418515	0.317342
324.23	0.53699	0.510495	0.422925	0.418448	0.317281
324.43	0.537663	0.511035	0.423361	0.41889	0.317716
324.63	0.538004	0.511339	0.423881	0.418867	0.317561
324.83	0.538467	0.512267	0.424534	0.419702	0.317929
325.03	0.538418	0.512304	0.424445	0.419789	0.317745
325.23	0.538475	0.512965	0.424701	0.419887	0.317637
325.43	0.538863	0.513038	0.424744	0.420151	0.317833
325.63	0.539041	0.513511	0.425384	0.421096	0.318342
325.83	0.538787	0.51372	0.425655	0.421558	0.318201
326.03	0.538981	0.514013	0.42581	0.422024	0.318518
326.23	0.538997	0.513873	0.425522	0.421903	0.318581
326.43	0.53912	0.514236	0.425687	0.42215	0.318636
326.63	0.539186	0.514535	0.426206	0.422544	0.319375
326.83	0.539615	0.515173	0.426281	0.422744	0.319759
327.03	0.540368	0.51597	0.427097	0.423035	0.320335
327.23	0.540314	0.516083	0.426859	0.423462	0.320598
327.43	0.540689	0.516725	0.427288	0.42364	0.320741
327.63	0.541304	0.516722	0.427422	0.423375	0.320981
327.83	0.54146	0.517203	0.427556	0.422896	0.321167
328.03	0.541587	0.517348	0.427894	0.423276	0.321392
328.23	0.541464	0.517472	0.427782	0.422675	0.321415
328.43	0.541257	0.517662	0.427499	0.422302	0.321363
328.63	0.541384	0.51795	0.427471	0.421907	0.321662
328.83	0.541764	0.518748	0.427499	0.422129	0.321812
329.03	0.541253	0.518338	0.427087	0.421786	0.321629
329.23	0.541655	0.518596	0.42699	0.421741	0.321794
329.43	0.541537	0.518583	0.42684	0.421766	0.321705
329.63	0.541378	0.518433	0.426774	0.422003	0.321282
329.83	0.541709	0.518697	0.42678	0.422236	0.321172
330.03	0.542134	0.518591	0.426946	0.422612	0.321408
330.23	0.54206	0.517808	0.42658	0.422698	0.320815
330.43	0.541923	0.517748	0.426948	0.423267	0.320913
330.63	0.541865	0.517609	0.426955	0.423637	0.321078
330.83	0.541841	0.517264	0.426508	0.423805	0.32062
331.03	0.541805	0.517336	0.426621	0.424524	0.320517
331.23	0.541346	0.517063	0.426556	0.42496	0.320443
331.43	0.541955	0.517628	0.427147	0.424952	0.320702
331.63	0.542368	0.517108	0.42737	0.425058	0.321206
331.83	0.542512	0.517111	0.42737	0.425506	0.321733
332.03	0.541974	0.516578	0.427195	0.425775	0.321801
332.23	0.542511	0.517015	0.427418	0.425348	0.32259
332.43	0.543152	0.517154	0.428197	0.425626	0.323266
332.63	0.543974	0.517219	0.428588	0.425827	0.324056
332.83	0.544563	0.517184	0.428417	0.426211	0.324036
333.03	0.544578	0.517495	0.428838	0.426073	0.32447
333.23	0.54468	0.517754	0.428977	0.426078	0.324642
333.43	0.544197	0.518318	0.429176	0.42639	0.324294
333.63	0.545004	0.519037	0.429562	0.42659	0.324528
333.83	0.545348	0.519374	0.429672	0.42663	0.324504
334.03	0.545352	0.519776	0.430011	0.426762	0.324521
334.23	0.545114	0.520013	0.430168	0.426794	0.324571
334.43	0.544859	0.520394	0.430298	0.42674	0.324762
334.63	0.545324	0.521182	0.430766	0.427133	0.32512
334.83	0.545377	0.521045	0.43043	0.426964	0.324499
335.03	0.545504	0.521346	0.43052	0.42712	0.324513
335.23	0.54553	0.521527	0.43088	0.426878	0.32433
335.43	0.546168	0.521904	0.431305	0.426839	0.324557
335.63	0.546468	0.521668	0.431639	0.427402	0.324997
335.83	0.546847	0.521824	0.432063	0.428136	0.325512
336.03	0.54671	0.522003	0.432145	0.428338	0.325452
336.23	0.547809	0.521928	0.43278	0.428673	0.325975
336.43	0.54805	0.521367	0.433065	0.429044	0.326187
336.63	0.547882	0.521065	0.433067	0.429898	0.326333
336.83	0.548132	0.521201	0.433303	0.430318	0.326418
337.03	0.548046	0.521608	0.43384	0.430672	0.326809
337.23	0.547839	0.521581	0.433694	0.431024	0.326771
337.43	0.548203	0.522448	0.434221	0.431657	0.326952
337.63	0.548394	0.522892	0.434356	0.431777	0.326957
337.83	0.548798	0.523484	0.434756	0.432294	0.327513
338.03	0.548398	0.523636	0.434939	0.432517	0.327958
338.23	0.548564	0.523577	0.435011	0.432638	0.328375
338.43	0.548643	0.523696	0.434865	0.432473	0.328517
338.63	0.549075	0.523938	0.434762	0.432412	0.328726
338.83	0.549277	0.523695	0.434433	0.431893	0.328324
339.03	0.549014	0.523818	0.434265	0.431475	0.328268
339.23	0.54922	0.524491	0.434387	0.431158	0.328228
339.43	0.549979	0.524983	0.434672	0.431559	0.328327
339.63	0.5503	0.525405	0.434574	0.432044	0.328277
339.83	0.550729	0.525599	0.434502	0.43259	0.328463
340.03	0.550837	0.526275	0.434722	0.433063	0.328913
340.23	0.551164	0.526234	0.435036	0.433295	0.329286
340.43	0.550924	0.526439	0.435554	0.433564	0.329557
340.63	0.55123	0.527328	0.436254	0.434126	0.33007
340.83	0.552297	0.528372	0.437384	0.434564	0.331068
341.03	0.551886	0.52889	0.437773	0.434759	0.331552
341.23	0.551933	0.529337	0.438246	0.434771	0.331721
341.43	0.552436	0.530068	0.438704	0.434991	0.33188
341.63	0.552712	0.530612	0.439202	0.435201	0.3324
341.83	0.553316	0.531113	0.440238	0.435704	0.333448
342.03	0.552793	0.529917	0.439543	0.434787	0.332878
342.23	0.552402	0.529571	0.43944	0.434388	0.332651
342.43	0.552584	0.52956	0.439378	0.434489	0.332855
342.63	0.552911	0.529655	0.439092	0.434622	0.332627
342.83	0.552814	0.529482	0.438841	0.434689	0.332453
343.03	0.553193	0.529418	0.438566	0.434933	0.332252
343.23	0.553496	0.529287	0.438526	0.435088	0.332175
343.43	0.553868	0.529125	0.438702	0.435659	0.3321
343.63	0.553685	0.528904	0.438221	0.436293	0.331851
343.83	0.553506	0.528575	0.438409	0.436366	0.331726
344.03	0.553131	0.52815	0.438674	0.436459	0.331608
344.23	0.553225	0.527866	0.438833	0.436668	0.331338
344.43	0.553442	0.527857	0.439296	0.436791	0.331438
344.63	0.553448	0.528587	0.439715	0.437158	0.332014
344.83	0.553027	0.528294	0.439997	0.437254	0.332096
345.03	0.55229	0.527996	0.439876	0.436952	0.331936
345.23	0.552285	0.5282	0.439555	0.436711	0.331909
345.43	0.552885	0.52886	0.439466	0.436884	0.331845
345.63	0.553074	0.528884	0.43972	0.436534	0.332067
345.83	0.553649	0.529177	0.440243	0.436532	0.332551
346.03	0.553744	0.529094	0.439975	0.436171	0.332513
346.23	0.55347	0.529431	0.43996	0.436203	0.33273
346.43	0.554974	0.53049	0.440581	0.436362	0.333419
346.63	0.555513	0.531062	0.440639	0.436459	0.333836
346.83	0.555342	0.531163	0.440628	0.436706	0.334008
347.03	0.556307	0.531939	0.440906	0.437323	0.334732
347.23	0.55648	0.532142	0.441332	0.437623	0.335329
347.43	0.556736	0.532886	0.441622	0.437902	0.335504
347.63	0.556522	0.533504	0.441605	0.438268	0.335506
347.83	0.556979	0.533802	0.442287	0.438578	0.335942
348.03	0.556849	0.533586	0.442227	0.438417	0.335697
348.23	0.556945	0.534095	0.442181	0.439129	0.335911
348.43	0.556949	0.53435	0.442459	0.439584	0.336059
348.63	0.556723	0.534656	0.442442	0.439927	0.336083
348.83	0.556822	0.534648	0.442197	0.439941	0.335753
349.03	0.556959	0.534642	0.442109	0.44013	0.335693
349.23	0.556455	0.534715	0.441798	0.440178	0.335188
349.43	0.557209	0.53475	0.442079	0.440358	0.335183
349.63	0.557556	0.534651	0.442558	0.44066	0.3358
349.83	0.558028	0.535002	0.442943	0.44103	0.33605
350.03	0.558073	0.534906	0.44282	0.441238	0.336458
350.23	0.558142	0.534498	0.442776	0.440979	0.336454
350.43	0.559109	0.534807	0.443176	0.440905	0.336735
350.63	0.558578	0.534614	0.443124	0.441131	0.336561
350.83	0.558517	0.534762	0.443193	0.441425	0.336285
351.03	0.558837	0.534772	0.443074	0.441308	0.336416
351.23	0.558869	0.534401	0.442964	0.441128	0.336301
351.43	0.558914	0.534582	0.442924	0.441281	0.336202
351.63	0.558887	0.534456	0.44319	0.441352	0.336137
351.83	0.559084	0.534312	0.443487	0.441104	0.336332
352.03	0.558896	0.534234	0.443289	0.44052	0.336145
352.23	0.55869	0.534232	0.443209	0.440474	0.336211
352.43	0.558819	0.534169	0.443566	0.440536	0.336082
352.63	0.558966	0.534147	0.443412	0.440222	0.335816
352.83	0.558995	0.534046	0.443482	0.440226	0.3355
[truncated: 1,835 more rows]

## Sheet: C (right, kinetics)
Include	Index	Color	Sensor Location	Sensor Type	Sensor Info	Replicate Group	Baseline Loc.	Assoc. (Sample) Loc.	Sample ID	Dissoc. Loc.	Loading Well Location	Loading Sample ID	Cycle	Conc. (uM)	Response	KD (M)	KD Error	kon(1/Ms)	kon Error	kdis(1/s)	kdis Error	RMax	RMax Error	kobs(1/s)	Req	Req/Rmax(%)	Full X^2	Full R^2
[truncated: 5 more rows]

[truncated: 2 more sheets: D, E]
