# Supplementary material for: Specific binding of Hsp27 and phosphorylated Tau mitigates abnormal Tau aggregation-induced pathology
Source: eLife. 2022 Sep 1;11:e79898. doi: 10.7554/eLife.79898 (PMC9436411; doi:10.7554/eLife.79898)
Supplement: Figure 4—figure supplement 1—source data 1. — (Figure 4—figure supplement 1). [file elife-79898-fig4-figsupp1-data1.xlsx]

## Sheet: C (left)
	Residue number	CSD (ppm)
	245	0.00197231
	246	0.00101435
pro	247
	248
pro	249
	250	0.00200721
pro	251
	252	0.00304304
	253	0.00142843
	254	0.00217313
	255	0.00105622
	256	0.00182781
	257	0.00131244
	258	0.0150838
	259	0.0112759
	260
	261	0.002064
	262	0.00409205
	263	0.00142843
	264	0.002
	265	0.00202869
	266
	267	0.00034
	268	0.00285685
	269	0.0101812
pro	270
	271	0.00142843
	272	0.00405739
	273	0.00405739
	274	0.00034
	306
	307	0.00952
	308	0.00131244
	309	0.002064
	310	0.00200721
	311	0.00200721
pro	312
	313	0.00285685
	314	0.001
	315	0.00952
	316	0.00200721
	317	0.00112254
	318	0.002
	319	0.00142843
	320	0.00105622
	321	0.0112759
	322
	323
	324	0.00105622
	325	0.00316866
	326	0.00405739
	327	0.00105622
	328	0.00182781
	329	0.002
his	330	0.00251811
	331
pro	332
	333	0.00142843
	334	0.00405739
	335	0.00405739
	336	0.00200721
	337
	338	0.00952
	339	0.001
	340	0.00105622
	341	0.00051
	342	0.00200721
	343	0.002
	344	0.00142843
	345	0.00211244
	346	0.00034
	347
	348	0.00285685
	349	0.00202869
	350	0.002
	351	0.00217313
	352	0.00131244
	353	0.0112759
	354
	355	0.002064
	356	0.00105622
	357	0.0112759
	358	0.00202869
	359	0.00105622
	360	0.002064
	361	0.00211244
	362	0.00305812
	363	0.002064
pro	364
	365	0.00142843
	366	0.00405739
	367	0.00405739
	368	0.00105622
	369
	370	0.0112759
	371	0.002064
	372	0.002
		CSD

## Sheet: C (right)
	Residue number	I/I0
	245	0.884276
	246	0.919576
pro	247
	248
pro	249
	250	0.820575
pro	251
	252	0.851492
	253	0.873591
	254	0.914765
	255	0.886068
	256	0.915134
	257	0.839362
	258	1.08831
	259	0.835699
	260
	261	0.871656
	262	0.915933
	263	0.845216
	264	0.917085
	265	0.877192
	266
	267	0.833431
	268	0.876226
	269	1.17169
pro	270
	271	0.918386
	272	0.989524
	273	0.989524
	274	0.833431
	306
	307	0.827992
	308	0.767487
	309	0.724247
	310	0.812475
	311	0.764001
pro	312
	313	0.876226
	314	0.8008
	315	0.827992
	316	0.845172
	317	0.955303
	318	0.827657
	319	0.867912
	320	0.886068
	321	0.835699
	322
	323
	324	0.843212
	325	1.0107
	326	0.989524
	327	0.886068
	328	0.915134
	329	0.813721
his	330	0.957362
	331
pro	332
	333	0.918386
	334	0.989524
	335	0.989524
	336	0.849665
	337
	338	0.827992
	339	0.901628
	340	0.858837
	341	0.866245
	342	0.882673
	343	0.813721
	344	0.873591
	345	0.840694
	346	0.833431
	347
	348	0.876226
	349	0.936422
	350	0.911111
	351	0.826242
	352	-0.0155638
	353	0.835699
	354
	355	0.871656
	356	0.843212
	357	0.835699
	358	0.804655
	359	0.886068
	360	0.904075
	361	0.89673
	362	1.02963
	363	0.849045
pro	364
	365	0.918386
	366	0.989524
	367	0.989524
	368	0.886068
	369
	370	0.835699
	371	0.924106
	372	0.895777
		IN
