# Supplementary material for: Specific binding of Hsp27 and phosphorylated Tau mitigates abnormal Tau aggregation-induced pathology
Source: eLife. 2022 Sep 1;11:e79898. doi: 10.7554/eLife.79898 (PMC9436411; doi:10.7554/eLife.79898)
Supplement: Figure 4—source data 1. — (Figure 4C). [file elife-79898-fig4-data1.xlsx]

## Sheet: C
	Residue numer	CSD (ppm)
	245	0.0411744
	246	0.00715
pro	247
	248	0.00428282
pro	249
	250	0.00102377
pro	251
	252	0
	253	0
	254	0.00413865
	255	0.00497349
	256	0.00265056
	257	0.00250197
	258	0.0190925
	259	0.00324183
	260	0
	261	0.0103119
	262	0.0604069
	263	0.00395495
	264	0.0108385
	265	0.0124212
	266	0.0151109
	267	0.023945
	268	0.0501727
	269	0
pro	270
	271	0.00596
	272	0.00732034
	273	0.00732034
	274	0.00661969
	306	0
	307	0
	308	0.00106019
	309	0.00144485
	310	0.00293
	311	0.00279
pro	312
	313	0
	314	0
	315	0
	316	0.00101817
	317	0.00311537
	318	0.00484022
	319	0.00353157
	320	0.00660107
	321	0
	322	0
	323	0
	324	0.0480087
	325	0.00474299
	326	0.00042
	327	0.00927075
	328	0.0114851
	329	0.00800866
his (unassigned)	330	0.0200965
	331
pro	332
	333	0.00596
	334	0.00732034
	335	0.00732034
	336	0.00374418
	337	0.00256839
	338	0
	339	0.00518032
	340	0.00481091
	341	0.00745414
	342	0.00249237
	343	0.00719903
	344	0
	345	0.00239016
	346	0.00722438
	347	0
	348	0
	349	0.00270189
	350	0
	351	0.00908297
	352	0.0704825
	353	0
	354	0
	355	0.0102831
	356	0.094717
	357	0
	358	0
	359	0.0054431
	360	0.0171781
	361	0.00153
	362	0.00554769
	363	0.0465012
pro	364
	365	0.00596
	366	0.00732034
	367	0.00732034
	368	0.00794964
	369	0.000461667
	370	0
	371	0
	372	0.00270542

## Sheet: D
	Residue numer	I/I0
	245	0.135192
	246	0.568353
pro	247
	248	0.800902
pro	249
	250	0.645809
pro	251
	252	0.60805
	253	0.647623
	254	0.608339
	255	0.628063
	256	0.65398
	257	0.534348
	258	0.293785
	259	0.799501
	260	0.586202
	261	0.73505
	262	0.878813
	263	0.563333
	264	0.662068
	265	0.484372
	266	0.678361
	267	0.836307
	268	0.59716
	269	0.710522
pro	270
	271	0.266355
	272	0.487724
	273	0.487724
	274	0.666471
	306	0.717172
	307	0.588487
	308	0.626978
	309	0.702254
	310	0.604217
	311	0.650036
pro	312
	313	0.695821
	314	0.537334
	315	0.588487
	316	0.570957
	317	0.485965
	318	0.636619
	319	0.764128
	320	0.398517
	321	0.589838
	322	0.60805
	323	0.339234
	324	0.643492
	325	0.772657
	326	0.456106
	327	0.538492
	328	0.692924
	329	0.643913
his (unassigned)	330
	331	1.12349
pro	332
	333	0.266355
	334	0.487724
	335	0.487724
	336	0.493767
	337	0.703905
	338	0.588487
	339	0.788757
	340	0.594365
	341	0.367269
	342	0.47081
	343	0.643913
	344	0.647623
	345	0.678714
	346	0.67105
	347	0.56352
	348	0.695821
	349	0.767484
	350	0.72871
	351	0.761478
	352	1.04044
	353	0.595898
	354	0.586202
	355	0.730124
	356	1.20888
	357	0.400651
	358	0.697637
	359	0.63544
	360	0.750992
	361	0.716624
	362	0.828649
	363	0.86314
pro	364
	365	0.266355
	366	0.487724
	367	0.487724
	368	0.224446
	369	0.476841
	370	0.76017
	371	0.595898
	372	0.969002
