# Supplementary material for: Specific binding of Hsp27 and phosphorylated Tau mitigates abnormal Tau aggregation-induced pathology
Source: eLife. 2022 Sep 1;11:e79898. doi: 10.7554/eLife.79898 (PMC9436411; doi:10.7554/eLife.79898)
Supplement: Figure 5—figure supplement 1—source data 1. [file elife-79898-fig5-figsupp1-data1.xlsx]

## Sheet: left
time	20 uM	10 uM	5 uM	2.5 uM	1.25 uM
0	-0.00153423	0.00281038	0.00273921	-0.00088609	-0.00036621
0.2	-0.00293405	0.0020739	0.00285021	-0.00065272	-8.1e-05
0.4	-0.00444817	0.00170229	0.00286994	-0.00021816	0.00027225
0.6	-0.00584645	0.00078333	0.00281406	-0.00029795	0.00030022
0.8	-0.00719038	0.00044913	0.00291838	0.00011475	0.00042168
1	-0.00855607	0.0001676	0.00274935	0.00050845	0.00058436
1.2	-0.00991574	-0.00037411	0.00244043	0.00091434	0.00044577
1.4	-0.0108453	-0.00028255	0.00260786	0.00150717	0.00087481
1.6	-0.0118334	-5.616e-05	0.00292286	0.00180721	0.00122185
1.8	-0.0124385	-7.027e-05	0.00271484	0.00191129	0.00136066
2	-0.0128379	-7.242e-05	0.00269286	0.0018365	0.00148618
2.2	-0.0129372	-0.0001271	0.00216751	0.001438	0.00124858
2.4	-0.0134186	-0.00066477	0.00124714	0.00043697	-0.00016499
2.6	-0.013488	-0.00051499	0.00082832	-8.189e-05	-0.00011008
2.8	-0.0138465	-0.00076932	0.00055182	-0.00082744	-0.00104409
3	-0.0135707	-0.0010182	0.00032035	-0.00110558	-0.00121311
3.2	-0.0136624	-0.00146567	-0.00013647	-0.00192798	-0.00161307
3.4	-0.0137771	-0.00144785	-0.00016482	-0.00221881	-0.00181688
3.6	-0.0140765	-0.00228422	-0.00081381	-0.00267858	-0.00234492
3.8	-0.0139365	-0.0021751	-0.00024908	-0.00237607	-0.0026575
4	-0.014165	-0.00257015	-0.00028637	-0.00276092	-0.00297991
4.2	-0.0137449	-0.00280394	-0.00021313	-0.0027328	-0.00340003
4.4	-0.0134776	-0.00272718	0.00020906	-0.00258656	-0.00335048
4.6	-0.0126284	-0.00255831	0.00109367	-0.00228368	-0.00350085
4.8	-0.0123649	-0.00191792	0.00173399	-0.00168265	-0.00354196
5	-0.0118735	-0.00161696	0.00179298	-0.00110673	-0.00350324
5.2	-0.0116003	-0.00129967	0.00215023	-0.00066143	-0.00339252
5.4	-0.0118608	-0.00054569	0.00237528	-0.00040864	-0.00295269
5.6	-0.0122636	-0.0004931	0.00255053	-0.00064717	-0.00275797
5.8	-0.0121886	-0.00031686	0.00235107	-0.00074655	-0.00267891
6	-0.0124899	-0.00019367	0.00219	-0.00085021	-0.00306388
6.2	-0.0131317	-0.00016135	0.00137699	-0.00154231	-0.00358802
6.4	-0.0135435	4.874e-05	0.0009333	-0.0022365	-0.00397464
6.6	-0.014173	0.00047219	0.00067053	-0.00237281	-0.00379732
6.8	-0.0138234	0.00066168	0.00083846	-0.00212085	-0.00356641
7	-0.0134946	0.00079147	0.00075484	-0.00204078	-0.00320187
7.2	-0.0141665	0.0005765	0.00023721	-0.00258505	-0.00349582
7.4	-0.0142503	0.00046756	-0.00027598	-0.00254186	-0.00354178
7.6	-0.0148572	2.344e-05	-0.00057041	-0.0023431	-0.0036625
7.8	-0.0146228	0.00015757	-0.00042577	-0.00193076	-0.00331585
8	-0.0150478	-0.00016475	-0.00062384	-0.0022386	-0.00372287
8.2	-0.0143597	-0.00053278	-0.00041928	-0.00220733	-0.00379865
8.4	-0.0140118	-0.00069566	0.00018769	-0.00195323	-0.00307639
8.6	-0.0132897	-0.00056621	0.00060319	-0.00142688	-0.00285556
8.8	-0.0128793	-0.00065917	0.00094713	-0.0009178	-0.00245167
9	-0.0125966	-0.00087435	0.00115171	-0.00038189	-0.00216735
9.2	-0.0126524	-0.00130683	0.00165329	-0.00064777	-0.00223569
9.4	-0.0128619	-0.00161192	0.00194808	-0.0007966	-0.00222829
9.6	-0.0129209	-0.00227312	0.00215429	-0.00092533	-0.00245716
9.8	-0.0131215	-0.00225624	0.00215981	-0.00106927	-0.00283288
10	-0.0132308	-0.00243962	0.00190331	-0.001382	-0.0033
10.2	-0.0131934	-0.00203902	0.00170994	-0.0015849	-0.00313903
10.4	-0.0130008	-0.00115825	0.00162397	-0.00121257	-0.00307367
10.6	-0.0137324	-0.00100544	0.00130949	-0.00149132	-0.00343669
10.8	-0.0132616	-0.00019302	0.00116579	-0.0018208	-0.00330242
11	-0.0136652	5.549e-05	0.00092402	-0.00230893	-0.00393443
11.2	-0.0141394	0.00036103	0.00057907	-0.00283001	-0.00432276
11.4	-0.0138857	0.00086617	0.00076843	-0.00270253	-0.00426992
11.6	-0.0140427	0.00132121	0.00074197	-0.00272627	-0.0040509
11.8	-0.0135827	0.00162245	0.00061949	-0.00271713	-0.00365873
12	-0.0137935	0.00179628	0.00035489	-0.00261864	-0.00376996
12.2	-0.0131075	0.00201079	0.00043103	-0.00229753	-0.00328898
12.4	-0.0130167	0.00197772	0.00076039	-0.00121464	-0.00281364
12.6	-0.0122803	0.00216989	0.00097968	-0.00069834	-0.00253132
12.8	-0.012077	0.00232547	0.00145417	0.00015323	-0.00249867
13	-0.012038	0.00203505	0.00145936	0.00010798	-0.00276285
13.2	-0.0116152	0.00163012	0.00142587	3.603e-05	-0.00315391
13.4	-0.0117351	0.00163607	0.00144979	-2.506e-05	-0.00307581
13.6	-0.0122123	0.00081717	0.00124222	-2.181e-05	-0.00316106
13.8	-0.0122098	0.00080335	0.00138923	-2.45e-06	-0.00335248
14	-0.0114957	0.00097199	0.00149154	0.00022028	-0.00310183
14.2	-0.0114419	0.00112372	0.00171913	0.00033832	-0.00303078
14.4	-0.0114274	0.0017007	0.00197812	0.00045512	-0.00287461
14.6	-0.0120209	0.00168332	0.00228891	-0.00028987	-0.00285886
14.8	-0.0119158	0.00196197	0.00274475	-0.00038147	-0.00254667
15	-0.0120855	0.00194353	0.00328531	-9.157e-05	-0.00238199
15.2	-0.0120929	0.00207101	0.003346	-0.00038009	-0.00223909
15.4	-0.0118335	0.0020827	0.0038972	-0.00047038	-0.00217578
15.6	-0.01115	0.00240201	0.00446532	-0.00018109	-0.00184485
15.8	-0.0114005	0.00268845	0.00449721	0.00026696	-0.00193605
16	-0.0113712	0.00264851	0.00462177	0.00060653	-0.0020742
16.2	-0.0119082	0.00251728	0.00461857	0.00062968	-0.00233827
16.4	-0.0120306	0.00228357	0.00420253	0.00101528	-0.00240822
16.6	-0.0115863	0.00238518	0.00351325	0.00048771	-0.00297297
16.8	-0.0122362	0.00233819	0.00293938	0.00099642	-0.00346957
17	-0.0122109	0.00269602	0.00253708	0.0006502	-0.0034547
17.2	-0.0122302	0.00284627	0.00227795	0.0006254	-0.0036744
17.4	-0.0124035	0.0029107	0.00227285	0.00060226	-0.00329162
17.6	-0.012639	0.00253747	0.00225916	0.00072493	-0.0032962
17.8	-0.0121205	0.00302148	0.00267235	0.00097382	-0.00330019
18	-0.0120451	0.0028516	0.002564	0.00088654	-0.0030238
18.2	-0.0124428	0.00265547	0.00258546	0.00061595	-0.00286421
18.4	-0.012801	0.00282718	0.00260936	0.00036095	-0.00254794
18.6	-0.0136678	0.00207403	0.00223441	-0.00035551	-0.00288371
18.8	-0.0140157	0.00191248	0.00216763	-0.00078168	-0.00291565
19	-0.014385	0.00146073	0.00170247	-0.00154128	-0.00342993
19.2	-0.0145872	0.00108748	0.00176976	-0.00187988	-0.00375862
19.4	-0.0142774	0.00147203	0.00231399	-0.00205549	-0.00402141
19.6	-0.0138146	0.00170268	0.00275747	-0.00173738	-0.00419558
19.8	-0.0140706	0.00182642	0.00271515	-0.00198485	-0.00422109
20	-0.0134019	0.00187203	0.00322904	-0.0014876	-0.00414273
20.2	-0.0134061	0.00202897	0.00341271	-0.00124824	-0.00425376
20.4	-0.0131478	0.00197772	0.00329665	-0.00082086	-0.00416033
20.6	-0.012581	0.00231912	0.00387528	-0.00052267	-0.00417928
20.8	-0.0126208	0.00260078	0.00444944	0.0002826	-0.0040269
21	-0.0123885	0.00310277	0.00464004	0.00024326	-0.00382006
21.2	-0.0122352	0.00308455	0.0048598	0.00051252	-0.00367106
21.4	-0.0116976	0.0033968	0.00535237	0.00102495	-0.00318222
21.6	-0.0115601	0.00368749	0.0056337	0.00130917	-0.00301626
21.8	-0.0111244	0.0042425	0.00615875	0.00197147	-0.00233627
22	-0.011572	0.00398813	0.00599503	0.00196147	-0.00211847
22.2	-0.0113685	0.0041973	0.00627962	0.00237928	-0.00155223
22.4	-0.0114968	0.00439093	0.00644791	0.00250508	-0.00098165
22.6	-0.0117814	0.00440224	0.0061458	0.00271206	-0.00093009
22.8	-0.0124209	0.00454129	0.00576759	0.00215388	-0.00088123
23	-0.0129456	0.00421182	0.00514048	0.00205913	-0.00099341
23.2	-0.0127463	0.00457722	0.00518856	0.0024577	-0.00080368
23.4	-0.0126416	0.00510651	0.00511541	0.00232044	-0.00084399
23.6	-0.0128525	0.00457672	0.00443556	0.00200138	-0.00124994
23.8	-0.0131148	0.00434561	0.00425134	0.00167711	-0.00155204
24	-0.0133373	0.00399801	0.00380749	0.00184675	-0.00236006
24.2	-0.0140929	0.00352978	0.00308988	0.00104387	-0.00309857
24.4	-0.0143851	0.00335895	0.00289334	0.00082296	-0.00351646
24.6	-0.0144617	0.00316041	0.00289729	0.00067998	-0.0037406
24.8	-0.0150173	0.00258224	0.00247996	0.00037311	-0.00465207
25	-0.0153309	0.00245193	0.00209166	1.458e-05	-0.00474732
25.2	-0.0153482	0.00233134	0.00224416	-7.51e-05	-0.00472749
25.4	-0.0147377	0.00285574	0.00263024	0.00026114	-0.00461709
25.6	-0.0144929	0.00308145	0.0029203	0.00054783	-0.0042759
25.8	-0.0142987	0.00334736	0.00370802	0.00121287	-0.00379251
26	-0.014038	0.00304627	0.00414663	0.00102768	-0.00386166
26.2	-0.0135355	0.00311629	0.00455883	0.0018828	-0.00322122
26.4	-0.0136519	0.00312335	0.00475047	0.00153225	-0.00300135
26.6	-0.0136977	0.00322629	0.0045555	0.00159519	-0.00297423
26.8	-0.0137644	0.00353245	0.00485128	0.0012544	-0.00278915
27	-0.0128335	0.00385281	0.00514018	0.00148036	-0.00244532
27.2	-0.0120253	0.00443099	0.00560867	0.00136619	-0.00198926
27.4	-0.01182	0.00456728	0.00571872	0.00115376	-0.00201604
27.6	-0.0115872	0.00484203	0.00559591	0.00112755	-0.00163393
27.8	-0.011139	0.00560015	0.0058476	0.00126809	-0.00113927
28	-0.0108026	0.00595833	0.00563635	0.00116274	-0.00123582
28.2	-0.0109789	0.00599516	0.00558389	0.00123291	-0.00125885
28.4	-0.0105962	0.00600159	0.00581833	0.00164157	-0.00108836
28.6	-0.0103838	0.00648673	0.00606567	0.0021961	-0.0007024
28.8	-0.0105349	0.00647625	0.00604494	0.00223515	-0.00111396
29	-0.0101425	0.00700856	0.00613575	0.00245932	-0.00093642
29.2	-0.0106293	0.0067616	0.00569895	0.00200991	-0.00128013
29.4	-0.0107322	0.00686892	0.00546256	0.00193423	-0.00130398
29.6	-0.011068	0.00651569	0.00552566	0.0022889	-0.00101388
29.8	-0.0118049	0.00577196	0.00540816	0.00208972	-0.0015376
30	-0.0120231	0.00491221	0.00512217	0.00125671	-0.00205437
30.2	-0.0122097	0.00489796	0.00519715	0.0019067	-0.00163777
30.4	-0.0127098	0.00469859	0.00501709	0.00116687	-0.00208682
30.6	-0.0131341	0.00506234	0.00494528	0.00145078	-0.00228681
30.8	-0.0136463	0.00480948	0.00516747	0.00137405	-0.00242483
31	-0.0134103	0.00471691	0.00512359	0.00150963	-0.0024253
31.2	-0.0138626	0.00523616	0.0053759	0.00162786	-0.00233819
31.4	-0.0134165	0.00573388	0.00566564	0.00203706	-0.00190138
31.6	-0.013581	0.00599603	0.00563927	0.00205642	-0.00142643
31.8	-0.0135924	0.00606343	0.00553234	0.00207457	-0.00191785
32	-0.0139586	0.00563456	0.00542582	0.00212219	-0.00250742
32.2	-0.0148564	0.00533981	0.00525397	0.00244906	-0.00259726
32.4	-0.0143412	0.00548459	0.00535708	0.00255199	-0.00252418
32.6	-0.0140455	0.00577402	0.00548835	0.00279143	-0.00260816
32.8	-0.0145849	0.00556227	0.00497913	0.00249182	-0.00308532
33	-0.0140391	0.00561481	0.00481564	0.00233057	-0.00310701
33.2	-0.0148642	0.0047385	0.0042078	0.00141654	-0.00346119
33.4	-0.0143522	0.00469867	0.00458006	0.00152731	-0.00296842
33.6	-0.0145028	0.00425872	0.00447643	0.00120892	-0.00325645
33.8	-0.0139932	0.00407774	0.00495602	0.00132376	-0.00351021
34	-0.0138798	0.00377666	0.00519666	0.00100657	-0.00360969
34.2	-0.0135912	0.00390855	0.00538341	0.00123627	-0.00318354
34.4	-0.013304	0.00396108	0.00584808	0.001137	-0.00332323
34.6	-0.0129959	0.00426663	0.00584482	0.00125948	-0.00334265
34.8	-0.0121627	0.00473093	0.00655743	0.00148837	-0.00281191
35	-0.0116447	0.00546462	0.00725361	0.00169418	-0.0028452
35.2	-0.0113585	0.00608185	0.0076525	0.00172128	-0.00284773
35.4	-0.0102177	0.00649828	0.00791553	0.00181508	-0.00209737
35.6	-0.0107132	0.00641697	0.00784791	0.00181718	-0.00212041
35.8	-0.0105854	0.00668424	0.00808384	0.00223901	-0.00226091
36	-0.0109351	0.00662972	0.00812212	0.00231652	-0.00219845
36.2	-0.0114103	0.00668593	0.00795127	0.00240302	-0.00188503
36.4	-0.0108258	0.00695415	0.00825542	0.00296716	-0.00153728
36.6	-0.0111159	0.00702322	0.00815111	0.00294248	-0.00131379
36.8	-0.0115549	0.00699275	0.00795582	0.00325997	-0.00086118
37	-0.0115267	0.00667277	0.00778435	0.00320892	-0.00075789
37.2	-0.0118202	0.00652746	0.00753265	0.00278634	-0.00072366
37.4	-0.0114684	0.00686243	0.00794748	0.003174	-2.001e-05
37.6	-0.0123152	0.00630709	0.00768028	0.00291063	-0.00068367
37.8	-0.0120836	0.00615598	0.00830388	0.00329592	-0.00044332
38	-0.0123663	0.00573157	0.00816279	0.00267582	-0.00085759
38.2	-0.0120531	0.00571426	0.00814809	0.0026819	-0.00076231
38.4	-0.0119541	0.00598917	0.00812431	0.00265795	-0.00128408
38.6	-0.0122291	0.00605622	0.00756508	0.00222331	-0.00166586
38.8	-0.0122574	0.00624326	0.00731433	0.0017384	-0.00191671
39	-0.012775	0.00651302	0.00704229	0.00166952	-0.00239232
39.2	-0.0124866	0.00627794	0.0067246	0.00163937	-0.00256705
39.4	-0.0120416	0.00648874	0.00635595	0.00194706	-0.00218364
39.6	-0.0125507	0.00614445	0.00617894	0.0018365	-0.00251402
39.8	-0.0130965	0.00557621	0.00545517	0.00164948	-0.00316091
40	-0.013651	0.00530185	0.0048545	0.00160029	-0.00347691
40.2	-0.013904	0.00509265	0.00454183	0.00172691	-0.00357145
40.4	-0.0132192	0.0052073	0.00467597	0.00186206	-0.00343328
40.6	-0.0130853	0.00511809	0.00454628	0.00182386	-0.00338483
40.8	-0.0127101	0.00517552	0.00490979	0.00230244	-0.00298453
41	-0.0119864	0.00583302	0.00526374	0.00272757	-0.00255999
41.2	-0.0115205	0.0063732	0.00561072	0.00289308	-0.00257068
41.4	-0.0114567	0.00681771	0.00614305	0.00332949	-0.00294626
41.6	-0.0115562	0.00670763	0.00686199	0.0038428	-0.00319352
41.8	-0.011224	0.00677937	0.00733173	0.00434847	-0.00330054
42	-0.0115201	0.00701985	0.00761738	0.00472315	-0.00367844
42.2	-0.0122128	0.00724589	0.00751849	0.00473293	-0.00424838
42.4	-0.0124164	0.00750812	0.00745472	0.00461053	-0.00433099
42.6	-0.0125392	0.00764396	0.00750191	0.00475283	-0.00410744
42.8	-0.0126641	0.00782872	0.00728909	0.00451737	-0.00391457
43	-0.0126322	0.00835292	0.00785267	0.00504066	-0.0033861
43.2	-0.0122074	0.00802744	0.00806145	0.00507214	-0.00299195
43.4	-0.012142	0.00877732	0.00817352	0.00561755	-0.00229879
43.6	-0.0125327	0.00838558	0.00816308	0.00545622	-0.00229326
43.8	-0.0124532	0.00856598	0.00787291	0.00570883	-0.00177092
44	-0.0125117	0.0086164	0.00791592	0.00535826	-0.00143073
44.2	-0.0124579	0.00805146	0.00764102	0.00451517	-0.00128275
44.4	-0.0120788	0.00762575	0.00736585	0.00406132	-0.00144175
44.6	-0.0117443	0.00765566	0.00756609	0.00442293	-0.00094228
44.8	-0.0115499	0.00763057	0.00753282	0.00409729	-0.00115129
45	-0.0109337	0.00843362	0.00793115	0.00452819	-0.00103204
45.2	-0.0116499	0.00817926	0.00797026	0.00413382	-0.00178236
45.4	-0.0120068	0.00785767	0.00820437	0.00430187	-0.00233518
45.6	-0.0119278	0.00748088	0.00870548	0.00461381	-0.00214417
45.8	-0.0124957	0.00701898	0.00805944	0.00420787	-0.00307973
46	-0.0132066	0.00689338	0.00774422	0.00406572	-0.00350163
46.2	-0.0137828	0.00680344	0.00752079	0.003576	-0.00375347
46.4	-0.0136022	0.00669274	0.00743843	0.00356957	-0.0033693
46.6	-0.0136619	0.00686299	0.0076831	0.00355686	-0.00321944
46.8	-0.0135986	0.00678866	0.00770829	0.00339647	-0.00314685
47	-0.0134355	0.00702378	0.00819833	0.00372286	-0.00270613
47.2	-0.012902	0.00740878	0.0084374	0.00388324	-0.00228446
47.4	-0.0126052	0.00787968	0.00856258	0.00442971	-0.002098
47.6	-0.0123573	0.00784156	0.00834473	0.00423429	-0.00207343
47.8	-0.0123886	0.00775509	0.00760914	0.00406246	-0.00199316
48	-0.0129039	0.00693927	0.00726772	0.00346311	-0.00229319
48.2	-0.0133148	0.00671272	0.00667767	0.00310497	-0.00264668
48.4	-0.013088	0.00705368	0.00699417	0.00341854	-0.00282838
48.6	-0.0131913	0.00753745	0.0072812	0.00352611	-0.00278657
48.8	-0.0128904	0.00802317	0.00748442	0.00319522	-0.00314881
49	-0.0130356	0.00812009	0.0078176	0.00327077	-0.00319202
49.2	-0.0132011	0.00768315	0.00785101	0.00297013	-0.00344257
49.4	-0.013089	0.0074445	0.0076935	0.00272217	-0.00412606
49.6	-0.0130418	0.00747026	0.00770539	0.00275699	-0.00425577
49.8	-0.013375	0.00753308	0.00749982	0.0027401	-0.00438073
50	-0.0138694	0.00729303	0.00731035	0.00256174	-0.00427903
50.2	-0.0138057	0.00738333	0.007763	0.00271067	-0.00378863
50.4	-0.013942	0.00692594	0.00734642	0.00267762	-0.00383008
50.6	-0.0141703	0.00713144	0.00781164	0.00262207	-0.00336543
50.8	-0.0137629	0.00708766	0.00826149	0.00295912	-0.0029472
51	-0.0137379	0.00722335	0.00834252	0.00306591	-0.00252713
51.2	-0.0133083	0.00716448	0.00840601	0.0031224	-0.00228553
51.4	-0.0126619	0.00750274	0.00880739	0.00361793	-0.00199866
51.6	-0.0124069	0.00779267	0.00897842	0.00343726	-0.00163092
51.8	-0.0125999	0.008009	0.00911275	0.00376793	-0.00132886
52	-0.0122838	0.00836255	0.00983041	0.00393166	-0.00112084
52.2	-0.0125652	0.00923335	0.00999542	0.00437159	-0.00080586
52.4	-0.0123493	0.00971242	0.0103903	0.00478594	-0.00037683
52.6	-0.0125625	0.0098579	0.0101547	0.0047617	-0.00072275
52.8	-0.0119936	0.0101796	0.0104464	0.0049209	-0.0004572
53	-0.0124224	0.0100203	0.010489	0.00509934	-0.00075006
53.2	-0.011756	0.0103689	0.0107496	0.00545558	-0.00083033
53.4	-0.011767	0.0104276	0.0105044	0.00550008	-0.00140325
53.6	-0.0121019	0.0103768	0.00990861	0.00548088	-0.00180624
53.8	-0.0123701	0.0105112	0.00945483	0.00551559	-0.00190462
54	-0.0123246	0.00996136	0.0091342	0.00525236	-0.00230437
54.2	-0.012389	0.00956532	0.00902892	0.00577872	-0.00230374
54.4	-0.0127171	0.00905836	0.00836372	0.00544015	-0.00241982
54.6	-0.0130177	0.00929351	0.00852128	0.00539031	-0.00207889
54.8	-0.0125236	0.00930113	0.00870067	0.00586342	-0.00197278
55	-0.0121949	0.00924104	0.00887335	0.00620625	-0.00203833
55.2	-0.0114301	0.00897024	0.00961328	0.00654643	-0.00168155
55.4	-0.0112461	0.00897994	0.00986532	0.00647196	-0.0016687
55.6	-0.0113875	0.00883989	0.0100022	0.00626024	-0.00131921
55.8	-0.0118356	0.00915267	0.00989738	0.00640404	-0.00114542
56	-0.0119476	0.00911902	0.0101732	0.00677087	-0.00079028
56.2	-0.0123364	0.0095542	0.0100047	0.00701057	-0.00030685
56.4	-0.0126488	0.00910237	0.00949845	0.00641566	-0.00043081
56.6	-0.0121621	0.00921098	0.00965708	0.00637874	-0.0001767
56.8	-0.012037	0.0101127	0.0100907	0.00641235	0.00042028
57	-0.0119716	0.0100355	0.00974347	0.00612622	1.376e-05
57.2	-0.0116051	0.00986442	0.00935965	0.00580137	-0.00055893
57.4	-0.0117772	0.0100447	0.00917898	0.00567956	-0.000765
57.6	-0.0121375	0.00985871	0.00892453	0.00517022	-0.00116295
57.8	-0.0117382	0.010298	0.00908545	0.00538649	-0.00110692
58	-0.0113929	0.010141	0.00909854	0.00561318	-0.00103982
58.2	-0.0116988	0.00997426	0.00896326	0.00577916	-0.00101625
58.4	-0.0111266	0.0100298	0.00911957	0.00592196	-0.00090924
58.6	-0.0113074	0.00976181	0.00932824	0.0058472	-0.00154663
58.8	-0.010519	0.00980282	0.00972477	0.00625997	-0.00226963
59	-0.0101766	0.00941993	0.00980246	0.0063252	-0.00264585
59.2	-0.0107844	0.0083477	0.00940527	0.00579072	-0.00293155
59.4	-0.0111993	0.00821329	0.00946712	0.00571926	-0.00305485
59.6	-0.0114617	0.00825241	0.00994522	0.00582897	-0.00280026
59.8	-0.0123392	0.00840027	0.00979529	0.00565871	-0.00301985
60	-0.0124654	0.00848431	0.00997469	0.00579803	-0.00264373
60.2	-0.0127249	0.00919543	0.00982229	0.00555521	-0.00240864
60.4	-0.0131688	0.00864466	0.00966796	0.00541768	-0.00239198
60.6	-0.0134392	0.0087261	0.00971675	0.00560976	-0.00181134
60.8	-0.0143812	0.00901464	0.00979143	0.00543071	-0.00193632
61	-0.0145434	0.00850994	0.00957325	0.00511052	-0.00234277
61.2	-0.0146994	0.00877012	0.00956999	0.00521391	-0.00212563
61.4	-0.0149862	0.00914224	0.00981684	0.0057485	-0.00171723
61.6	-0.0150459	0.00913372	0.00978271	0.00560827	-0.00175984
61.8	-0.0149949	0.00927064	0.00960778	0.00581138	-0.00167643
62	-0.0153732	0.00865496	0.00928816	0.00566684	-0.00166987
62.2	-0.0150799	0.00843958	0.00957989	0.00537352	-0.00179514
62.4	-0.0142641	0.00843103	0.0100326	0.00561912	-0.0020222
62.6	-0.0144141	0.0081668	0.00989356	0.00492153	-0.00267132
62.8	-0.0140196	0.00788364	0.00919801	0.00447011	-0.00312207
63	-0.0134483	0.00790667	0.0095989	0.00510574	-0.00237432
63.2	-0.013466	0.00787521	0.00995602	0.00527665	-0.00202973
63.4	-0.0127543	0.00879002	0.0108058	0.00574196	-0.00160319
63.6	-0.0126672	0.00882654	0.0107679	0.00547074	-0.00159588
63.8	-0.0121561	0.00929293	0.0107482	0.00565999	-0.00145991
64	-0.0119352	0.00967508	0.0108807	0.00596107	-0.00120979
64.2	-0.0118326	0.00979519	0.0109562	0.00625286	-0.00125142
64.4	-0.0119092	0.00904514	0.0108333	0.00653335	-0.00160895
64.6	-0.0117711	0.00904436	0.0109334	0.00657685	-0.00148162
64.8	-0.0115289	0.00917503	0.0111243	0.00634245	-0.0017241
65	-0.0114368	0.00942374	0.0107666	0.00668951	-0.00184377
65.2	-0.011944	0.00919941	0.0101568	0.00680828	-0.00185053
65.4	-0.0124694	0.00887081	0.0100007	0.00655369	-0.00209079
65.6	-0.0128797	0.00831371	0.00989179	0.00587796	-0.00244494
65.8	-0.0131531	0.00792629	0.00987365	0.00585412	-0.00241609
66	-0.0133752	0.00749132	0.009482	0.00529783	-0.00255881
66.2	-0.0133043	0.00764403	0.00971578	0.0053512	-0.00242319
66.4	-0.0140377	0.00723501	0.00919889	0.0048789	-0.00327591
66.6	-0.0143593	0.00722239	0.00892432	0.00466016	-0.00352156
66.8	-0.0144381	0.00743344	0.00904442	0.0049747	-0.00316287
67	-0.0138048	0.00811995	0.0100432	0.00607013	-0.00230142
67.2	-0.0141938	0.00804441	0.00938159	0.0056276	-0.00264126
67.4	-0.014079	0.00829862	0.00969024	0.0057196	-0.0025926
67.6	-0.0137831	0.00831568	0.00987115	0.00595151	-0.00237331
67.8	-0.0134343	0.00870954	0.01054	0.00663823	-0.00209004
68	-0.0134261	0.00879027	0.0107286	0.00676853	-0.00195028
68.2	-0.0132712	0.00910503	0.0108608	0.00722477	-0.00193629
68.4	-0.0132143	0.00929728	0.0113855	0.00756419	-0.00172786
68.6	-0.0132097	0.00933533	0.0115127	0.00711386	-0.00150967
68.8	-0.013482	0.00910711	0.0111272	0.00660153	-0.00171541
69	-0.0137876	0.00926171	0.0107143	0.00671467	-0.00188528
69.2	-0.0138697	0.00918327	0.0107354	0.00635198	-0.00194723
69.4	-0.0134954	0.00953059	0.0109313	0.00590548	-0.001685
69.6	-0.0128576	0.0099598	0.0115605	0.00604245	-0.00138977
69.8	-0.0126787	0.0102057	0.0114102	0.00656693	-0.00110426
70	-0.0124164	0.0103129	0.0114181	0.0066761	-0.00097482
70.2	-0.0123537	0.0108258	0.011689	0.00674744	-0.00081976
70.4	-0.0122797	0.0112244	0.0115319	0.00686332	-0.00124367
70.6	-0.0121442	0.0118657	0.0118622	0.00742816	-0.00110707
70.8	-0.0121007	0.0120068	0.0115926	0.00746897	-0.00120983
71	-0.0113565	0.0124416	0.0116201	0.00786542	-0.00134485
71.2	-0.0116596	0.0121869	0.0111731	0.00749934	-0.00157947
71.4	-0.0115625	0.0127474	0.011782	0.00779769	-0.00160844
71.6	-0.0116259	0.0129305	0.01204	0.00778989	-0.00113568
71.8	-0.0116919	0.0130281	0.0120854	0.00765026	-0.00131435
72	-0.0116995	0.012796	0.0121012	0.00743468	-0.00116232
72.2	-0.0123278	0.0129046	0.0120741	0.00753386	-0.00134482
72.4	-0.0121745	0.0125349	0.0125607	0.00741064	-0.00108187
72.6	-0.012635	0.012137	0.012222	0.00668599	-0.00160622
72.8	-0.0127527	0.0122303	0.0122933	0.00673543	-0.00132843
73	-0.0126894	0.0122722	0.0127282	0.00694016	-0.00103708
73.2	-0.0119192	0.0126179	0.013068	0.00736985	-0.00060838
73.4	-0.0119778	0.0121815	0.0130023	0.0070447	-0.00053233
73.6	-0.0118776	0.0120205	0.0131584	0.00733036	-0.00018308
73.8	-0.0120052	0.0119527	0.0129131	0.00793022	6.028e-05
74	-0.0115809	0.0119647	0.0135062	0.00814215	0.00040826
74.2	-0.01199	0.0119196	0.0131039	0.00809937	0.00036467
74.4	-0.0120738	0.0122616	0.0128924	0.00855268	2.81e-05
74.6	-0.0126435	0.0119842	0.0123218	0.00817712	-0.00056071
74.8	-0.012434	0.0120815	0.0119771	0.00796131	-0.00100637
75	-0.0123984	0.0122154	0.0117841	0.00797312	-0.00109162
75.2	-0.0128598	0.0115019	0.0112099	0.00720849	-0.00171079
75.4	-0.0127018	0.0120046	0.0109549	0.00694147	-0.00191413
75.6	-0.0123583	0.0119774	0.0111162	0.00691494	-0.00160108
75.8	-0.0120622	0.0122338	0.0112593	0.00692062	-0.00152811
76	-0.011821	0.0123176	0.011647	0.0067579	-0.00104328
76.2	-0.0119015	0.0126746	0.0117419	0.00663649	-0.00087677
76.4	-0.0116587	0.0122528	0.0121013	0.00642715	-0.00062681
76.6	-0.0116979	0.0119698	0.0120275	0.00587755	-0.00070221
76.8	-0.0116141	0.0117998	0.0126163	0.00638351	-0.0001821
77	-0.0106662	0.0119095	0.0133972	0.00692054	0.00011434
77.2	-0.010182	0.0117232	0.013178	0.00716709	-9.161e-05
77.4	-0.0106082	0.0113252	0.0129525	0.00694364	-0.00046045
77.6	-0.0107819	0.0115084	0.0130066	0.00731159	-0.00024772
77.8	-0.010897	0.0112854	0.0133137	0.00723972	-0.00036581
78	-0.0111377	0.0112346	0.0136026	0.00740039	-0.00046469
78.2	-0.0111038	0.0117585	0.0137297	0.00798271	-0.00057971
78.4	-0.0109699	0.0121726	0.013664	0.00772568	-0.00074058
78.6	-0.0112471	0.0118704	0.0130853	0.00746797	-0.0011528
78.8	-0.0111805	0.0123203	0.0133096	0.00757399	-0.00157497
79	-0.011141	0.0120983	0.0130189	0.0078681	-0.00161556
79.2	-0.0110109	0.0123207	0.0129153	0.00787209	-0.00204912
79.4	-0.0104785	0.0133635	0.0133829	0.00851634	-0.00155583
79.6	-0.0101279	0.0137551	0.013825	0.00860374	-0.00154896
79.8	-0.0105404	0.0138318	0.0136036	0.00808596	-0.00177103
80	-0.0108657	0.0138477	0.0133468	0.00772409	-0.00182588
80.2	-0.0111559	0.0138421	0.0133266	0.00790227	-0.00178623
80.4	-0.0109343	0.0138437	0.0135315	0.00812338	-0.00140302
80.6	-0.0105792	0.0139458	0.0136987	0.00776802	-0.00140459
80.8	-0.0106792	0.0137569	0.0139279	0.00806736	-0.00136985
81	-0.0105626	0.0141082	0.0136679	0.00803181	-0.00121844
81.2	-0.0114153	0.0133905	0.0129995	0.00770189	-0.00163374
81.4	-0.0117395	0.0132397	0.0127845	0.00742532	-0.00176316
81.6	-0.0119443	0.0131621	0.0131674	0.00740799	-0.00158114
81.8	-0.0123035	0.0129428	0.0137104	0.00710154	-0.00160488
82	-0.0124711	0.0129834	0.0137567	0.00728285	-0.00165019
82.2	-0.0121352	0.0130694	0.0139554	0.00743822	-0.00133995
82.4	-0.0124709	0.0124528	0.0136547	0.00687692	-0.00184456
82.6	-0.0127507	0.0123309	0.0137961	0.00709855	-0.00226371
82.8	-0.0125986	0.0127695	0.0142273	0.00731934	-0.00247456
83	-0.0119776	0.0128035	0.0141568	0.0080022	-0.00217643
83.2	-0.0116817	0.0128427	0.0138711	0.00829496	-0.00238115
83.4	-0.0107378	0.013207	0.0145413	0.00904849	-0.00186912
83.6	-0.0105057	0.0126718	0.0140642	0.008527	-0.00193732
83.8	-0.0106798	0.0126027	0.0142742	0.00923722	-0.00169281
84	-0.0104252	0.012893	0.0145137	0.00979643	-0.00105991
84.2	-0.010291	0.013159	0.0147016	0.0101684	-0.00078762
84.4	-0.00996079	0.0131397	0.0142622	0.00985989	-0.00043208
84.6	-0.0100354	0.0128608	0.0138372	0.00929281	-0.00048266
84.8	-0.010425	0.012588	0.0134303	0.0095742	-0.00063545
85	-0.0106404	0.0127696	0.0131743	0.00959963	-0.00034739
85.2	-0.0111045	0.012312	0.0132656	0.0095288	-0.00048009
85.4	-0.0106998	0.012625	0.0136608	0.00929576	-0.0003263
85.6	-0.0112079	0.0129165	0.0142358	0.00924818	-0.00047172
85.8	-0.0123346	0.0125842	0.0137773	0.00837639	-0.00095121
86	-0.0126932	0.0122424	0.0133662	0.00802485	-0.00130051
86.2	-0.0130742	0.0118546	0.0131364	0.00755748	-0.00186285
86.4	-0.0127402	0.0117967	0.0131438	0.00729105	-0.0024623
86.6	-0.0131521	0.0121791	0.0132561	0.00726142	-0.00245953
86.8	-0.0129106	0.0125854	0.0129812	0.00711375	-0.0025319
87	-0.0126236	0.0127572	0.0125282	0.00712041	-0.00266758
87.2	-0.0125122	0.0124283	0.012342	0.00744775	-0.0024926
87.4	-0.0123982	0.0123811	0.0121925	0.0072807	-0.00243938
87.6	-0.0129271	0.0117459	0.0114321	0.00708779	-0.00296873
87.8	-0.0135333	0.0118405	0.0117123	0.00772994	-0.00286146
88	-0.0134911	0.0121201	0.0115175	0.00752699	-0.00312431
88.2	-0.0136416	0.0120984	0.0112053	0.00744612	-0.00332761
88.4	-0.0135159	0.0121317	0.0114336	0.00765153	-0.00284754
88.6	-0.0133569	0.0119213	0.0119108	0.00821155	-0.00268859
88.8	-0.0132993	0.0117418	0.0122592	0.00882493	-0.00250406
89	-0.0131457	0.011822	0.0126787	0.00895486	-0.00186955
89.2	-0.0129887	0.0123323	0.0137127	0.00955932	-0.00144474
89.4	-0.0122831	0.0127828	0.0144592	0.0104703	-0.00079949
89.6	-0.0122664	0.0128694	0.0148098	0.0104588	-0.00097576
89.8	-0.0121057	0.0128301	0.0150444	0.0105273	-0.00067946
90	-0.0116421	0.0129394	0.015782	0.0106825	-0.00046614
90.2	-0.0116319	0.0131695	0.0163311	0.0104124	-0.00033363
90.4	-0.0107591	0.0141222	0.0172418	0.0105185	0.00040557
90.6	-0.0114054	0.0144148	0.0169578	0.0103131	0.00025327
90.8	-0.0112214	0.0143984	0.0164541	0.00994645	-0.00030322
91	-0.0112844	0.014711	0.0161026	0.00995425	-0.00029782
91.2	-0.0111895	0.0146584	0.0158994	0.0094486	-0.00025993
91.4	-0.0115304	0.0145377	0.0151225	0.00922319	-0.00064959
91.6	-0.0115146	0.0147694	0.0150353	0.00942334	-0.00099957
91.8	-0.0114231	0.0147944	0.0151496	0.00925366	-0.00079902
92	-0.0111916	0.0153092	0.014931	0.00930508	-0.00098577
92.2	-0.0116481	0.0149676	0.0145139	0.00915757	-0.00081124
92.4	-0.0118308	0.0149673	0.0146185	0.00917843	-0.00050966
92.6	-0.0121023	0.0147676	0.0143777	0.00911193	-0.00050515
92.8	-0.0118481	0.0150338	0.0141759	0.00939228	-9.374e-05
93	-0.0117655	0.0151151	0.0144123	0.00965629	9.57e-05
93.2	-0.0112628	0.0155053	0.0151591	0.0102286	0.00042682
93.4	-0.0111235	0.0153255	0.0148886	0.0101977	0.00031945
93.6	-0.010925	0.0156738	0.015086	0.00986018	0.00024264
93.8	-0.0108906	0.0160874	0.0153591	0.0102424	0.0006665
94	-0.0112341	0.0164603	0.0152818	0.0100391	0.00059327
94.2	-0.0116513	0.0165663	0.0153391	0.0100114	0.00072634
94.4	-0.0114526	0.0167268	0.015591	0.0100356	0.00050065
94.6	-0.0119361	0.0161386	0.0146881	0.0100392	-0.00048665
94.8	-0.0118856	0.0162093	0.0147841	0.0103325	-0.00084495
95	-0.011918	0.0163506	0.0149199	0.0105162	-0.00050596
95.2	-0.012002	0.0162207	0.0146197	0.0104195	-0.00082875
95.4	-0.012446	0.0157441	0.0142396	0.0111369	-0.00125078
95.6	-0.0121735	0.0155136	0.0139556	0.0109769	-0.00167157
95.8	-0.0120041	0.0153199	0.014132	0.0111713	-0.00154963
96	-0.0124502	0.0156808	0.0140323	0.0113229	-0.00132009
96.2	-0.0126247	0.0153995	0.0139014	0.0108153	-0.0014616
96.4	-0.0120217	0.0153442	0.0142094	0.0108373	-0.00132485
96.6	-0.0119266	0.0149275	0.0143859	0.0106705	-0.0013256
96.8	-0.0119274	0.014127	0.0140622	0.0103556	-0.00160418
97	-0.0117003	0.0137319	0.0142849	0.0101159	-0.00147154
97.2	-0.011511	0.0132879	0.0143955	0.00964182	-0.00140026
97.4	-0.0112204	0.0133631	0.0142965	0.0095297	-0.00104994
97.6	-0.0111032	0.0134562	0.0147337	0.0102212	-0.00096877
97.8	-0.0113115	0.0132391	0.0148032	0.010065	-0.0007389
98	-0.0116263	0.0133202	0.0150651	0.0100619	-0.0006385
98.2	-0.0112534	0.0135985	0.0156434	0.0105225	1.772e-05
98.4	-0.0111552	0.0140607	0.015709	0.0108891	-2.338e-05
98.6	-0.0113239	0.0140847	0.0153787	0.0109424	-0.00034007
98.8	-0.0118896	0.0145028	0.0154504	0.0110324	-0.00012808
99	-0.01244	0.014159	0.015198	0.010954	-0.00025431
99.2	-0.0125666	0.0142882	0.0148437	0.0108339	-0.00049035
99.4	-0.0133806	0.0140567	0.0146274	0.0110445	-0.00049723
99.6	-0.0131582	0.014486	0.0147821	0.0108238	-0.0004352
99.8	-0.013183	0.0149841	0.0151436	0.010741	-0.00030733
100	-0.0136511	0.0148139	0.0146426	0.0102474	-0.00048191
100.2	-0.0136878	0.01444	0.0141638	0.00963801	-0.00082888
100.4	-0.0131241	0.0146605	0.0146501	0.00999548	-0.00024071
100.6	-0.013438	0.0148376	0.014924	0.00968551	-0.00036977
100.8	-0.0136049	0.0147093	0.0145931	0.00929002	-0.00059433
101	-0.0128565	0.0148138	0.0148705	0.00910889	-0.0004609
101.2	-0.013317	0.0144904	0.0150133	0.0089623	-0.00060476
101.4	-0.013374	0.014838	0.0152668	0.00939164	-0.00046741
101.6	-0.0139386	0.0147625	0.0152311	0.00934476	-0.00121222
101.8	-0.0138866	0.0149818	0.0151476	0.00902587	-0.00124222
102	-0.0137312	0.0151981	0.015208	0.00927542	-0.0016459
102.2	-0.0135387	0.0151095	0.0149093	0.0093989	-0.00166738
102.4	-0.013494	0.0155164	0.0150513	0.00989551	-0.00175278
102.6	-0.0134841	0.0152362	0.0150805	0.00959394	-0.00212803
102.8	-0.0136244	0.0149968	0.0151942	0.00968712	-0.0020685
103	-0.0135476	0.0147946	0.0149341	0.00962575	-0.00213333
103.2	-0.0130526	0.0147168	0.0147479	0.00975355	-0.00185796
103.4	-0.0134515	0.0143953	0.0147807	0.00968561	-0.0019347
103.6	-0.0129046	0.0148142	0.0148685	0.0093492	-0.00187329
103.8	-0.0126079	0.0148638	0.0146806	0.00915186	-0.0016878
104	-0.0127065	0.0147862	0.0145444	0.009117	-0.00153756
104.2	-0.0125692	0.0152048	0.0149296	0.00923372	-0.00124425
104.4	-0.0122085	0.0159909	0.0158604	0.0099052	-0.00032111
104.6	-0.0127489	0.0161562	0.0163329	0.00989746	-0.00028587
104.8	-0.0130647	0.0158227	0.01586	0.00981594	-0.00031359
105	-0.0133618	0.01524	0.0155289	0.0094658	-0.00085009
105.2	-0.0140698	0.0146871	0.0151437	0.00939684	-0.00105148
105.4	-0.0145067	0.0144642	0.0149854	0.00923409	-0.00132879
105.6	-0.0145949	0.014183	0.0147122	0.00897705	-0.00175787
105.8	-0.0146717	0.0138794	0.0146827	0.00948228	-0.00185365
106	-0.0151565	0.01327	0.0140882	0.00911219	-0.00267299
106.2	-0.0152586	0.0130793	0.0141352	0.00909123	-0.00264944
106.4	-0.014847	0.0136422	0.0144635	0.0097532	-0.0023138
106.6	-0.0145738	0.0134539	0.0140979	0.00922839	-0.00264348
106.8	-0.0140798	0.0137983	0.0141185	0.00917141	-0.00258452
107	-0.0139679	0.0136071	0.0136116	0.00838931	-0.00281213
107.2	-0.0140709	0.0135016	0.0137811	0.00838647	-0.00282575
107.4	-0.0143022	0.0142678	0.0140277	0.00799598	-0.00276675
107.6	-0.0138924	0.0151342	0.0139576	0.00819348	-0.00232643
107.8	-0.0136908	0.0155973	0.0144702	0.00839306	-0.00226432
108	-0.0132572	0.0158684	0.0149631	0.00877702	-0.00193928
108.2	-0.0132343	0.0162253	0.0150128	0.00897577	-0.0017437
108.4	-0.0129226	0.016394	0.0153053	0.00987218	-0.00087159
108.6	-0.0130901	0.0163134	0.0154527	0.0102577	-0.00072555
108.8	-0.0128644	0.0157733	0.0147741	0.010464	-0.00081821
109	-0.0124912	0.0152486	0.0147997	0.0102798	-0.00090863
109.2	-0.012212	0.0152303	0.0152518	0.0109481	-0.00017796
109.4	-0.0122538	0.0152955	0.0156928	0.0110747	6.885e-05
109.6	-0.012411	0.0148853	0.0158118	0.0110109	2.867e-05
109.8	-0.0125759	0.0146811	0.0157294	0.0111365	-0.00044245
110	-0.0125425	0.0145434	0.0157855	0.0108868	-0.00084704
110.2	-0.012317	0.0149616	0.0164877	0.0112996	-0.00058558
110.4	-0.0121527	0.0150111	0.0165852	0.0114361	-0.00046443
110.6	-0.012217	0.0149415	0.0166974	0.011194	-0.00061704
110.8	-0.0122779	0.0150331	0.0170314	0.0110126	-0.0007223
111	-0.0127712	0.0149116	0.0171295	0.0106461	-0.00103573
111.2	-0.0132285	0.0154801	0.0175502	0.0108978	-0.00101161
111.4	-0.0137026	0.0156965	0.0170731	0.0105674	-0.00143469
111.6	-0.0137158	0.015695	0.017417	0.0107494	-0.00138489
111.8	-0.0136255	0.0158944	0.0176567	0.0110625	-0.00120987
112	-0.0136559	0.0155541	0.0169849	0.0110451	-0.00139289
112.2	-0.0140897	0.0153658	0.016681	0.0112573	-0.00122771
112.4	-0.0140812	0.0153655	0.0169086	0.0119404	-0.00096262
112.6	-0.0144502	0.0155192	0.0168169	0.0117214	-0.00061976
112.8	-0.0145127	0.0156027	0.0165515	0.0116071	-0.0005495
113	-0.0144471	0.0160883	0.0171626	0.0115999	9.589e-05
113.2	-0.01437	0.0162671	0.0171784	0.0117694	0.00017892
113.4	-0.0147989	0.0157208	0.016786	0.0111058	-0.00036222
113.6	-0.0149511	0.0154848	0.0165936	0.0105524	-0.00048989
113.8	-0.0140571	0.0155745	0.0167781	0.0105361	-0.00056024
114	-0.013894	0.0156388	0.0171982	0.0101297	-0.00057801
114.2	-0.0135027	0.0156153	0.0175648	0.0100693	-0.00045378
114.4	-0.0131591	0.0148065	0.0174696	0.00954262	-0.00058982
114.6	-0.0130668	0.0141561	0.0172741	0.00899845	-0.00099585
114.8	-0.0125895	0.0142295	0.0174467	0.00889739	-0.00113853
115	-0.0125133	0.0141229	0.0174415	0.00850737	-0.00135119
115.2	-0.0125708	0.0140228	0.0171869	0.00879722	-0.00128787
115.4	-0.012935	0.0136217	0.0168105	0.00863904	-0.00119009
115.6	-0.0128023	0.0139926	0.0171348	0.00893909	-0.00099522
115.8	-0.0125613	0.0142784	0.0169591	0.00954299	-0.00077651
116	-0.0126227	0.0144051	0.0165755	0.0097335	-0.00098236
116.2	-0.0131356	0.0150881	0.0170885	0.0105122	-0.00065574
116.4	-0.0132212	0.0156786	0.0171546	0.0109712	-0.00051335
116.6	-0.0138655	0.0163956	0.016796	0.0114521	-6.758e-05
116.8	-0.0142029	0.0172449	0.0167106	0.012091	-8.978e-05
117	-0.0142186	0.0181878	0.017069	0.0126519	0.00050172
117.2	-0.0140034	0.0184871	0.0169039	0.0131091	0.00020996
117.4	-0.0147981	0.0180908	0.0166649	0.0126106	-0.00042748
117.6	-0.0142593	0.0185298	0.0171998	0.0126572	-8.21e-05
117.8	-0.0138806	0.0184999	0.0176114	0.0121465	-9.825e-05
118	-0.014347	0.0180388	0.0174212	0.0116179	-0.00031181
118.2	-0.0141449	0.0176962	0.0172013	0.0110581	-0.00037683
118.4	-0.0140586	0.0171501	0.0169749	0.0102362	-0.00028978
118.6	-0.0137313	0.0169744	0.0171984	0.0100502	-0.00044042
118.8	-0.013455	0.0172632	0.0176399	0.0104112	-0.00021986
119	-0.0129015	0.0175993	0.0182755	0.0102912	0.00030872
119.2	-0.0130034	0.017434	0.018085	0.0105682	9.034e-05
119.4	-0.0132569	0.0168545	0.0179847	0.0104526	0.00024758
119.6	-0.0132809	0.0167515	0.0180968	0.0108274	3.668e-05
119.8	-0.0130865	0.0167931	0.0182295	0.0109492	0.00015202
120	-0.0134033	0.0167309	0.0182937	0.0110484	-5.552e-05
120.2	-0.0141158	0.0166105	0.0181132	0.0111841	-7.501e-05
120.4	-0.0144641	0.0164235	0.017726	0.011112	-0.00012362
120.6	-0.0145544	0.0166073	0.0174509	0.0114914	-0.00012821
120.8	-0.0143959	0.0167757	0.0173542	0.0113779	-0.00011428
121	-0.0139625	0.0168123	0.0176491	0.0115747	0.00016898
121.2	-0.0136431	0.0163963	0.0174929	0.0121096	2.598e-05
121.4	-0.0140204	0.0161491	0.0172609	0.0118185	-9.8e-05
121.6	-0.0131039	0.0164654	0.0179257	0.0121915	0.00055006
121.8	-0.0134944	0.0165003	0.0174486	0.0116489	9.721e-05
122	-0.01339	0.0164698	0.0177418	0.0119725	-0.00018814
122.2	-0.0130261	0.0171974	0.0180677	0.0116313	7.239e-05
122.4	-0.0125971	0.0177775	0.018439	0.0119708	0.0003967
122.6	-0.0120618	0.0181232	0.0189245	0.0123792	0.0005277
122.8	-0.0118704	0.0179731	0.0188683	0.0123111	0.00053416
123	-0.0114022	0.0182902	0.0193097	0.01229	0.00082212
123.2	-0.0117434	0.0176086	0.0187459	0.0121413	-0.00014193
123.4	-0.0116901	0.0176125	0.019279	0.0123077	4.05e-06
123.6	-0.0119815	0.0174192	0.0193142	0.0120331	-0.00043589
123.8	-0.0120031	0.0174309	0.0192929	0.011761	-0.00077595
124	-0.0122168	0.0173039	0.0189945	0.0116559	-0.00117639
124.2	-0.0119707	0.0173972	0.0186139	0.0114196	-0.00086301
124.4	-0.0118882	0.0173519	0.0185954	0.0117092	-0.00099379
124.6	-0.0113523	0.0173362	0.0186095	0.011757	-0.0010762
124.8	-0.0114892	0.0175749	0.0184843	0.0116094	-0.00066442
125	-0.0117684	0.0175801	0.0180429	0.0120298	-0.00054049
125.2	-0.0122899	0.0172431	0.0173947	0.0122408	-0.00069997
125.4	-0.0127473	0.0173755	0.0171683	0.0120906	-0.00114182
125.6	-0.012816	0.0171484	0.0172261	0.0123692	-0.00130161
125.8	-0.0132716	0.0170397	0.0169264	0.0124464	-0.00165412
126	-0.0133662	0.0171138	0.0175941	0.0128013	-0.00183693
126.2	-0.0131835	0.017445	0.0176582	0.012777	-0.00158923
126.4	-0.0132806	0.01755	0.0173996	0.0127744	-0.00151503
126.6	-0.0129514	0.0174299	0.017809	0.0131361	-0.00085776
126.8	-0.0125998	0.0174366	0.0181152	0.0131201	-0.00063307
127	-0.0127466	0.0175653	0.0188134	0.0128469	-0.00062337
127.2	-0.0131142	0.0177677	0.0189877	0.012777	-0.00105343
127.4	-0.0131807	0.0177088	0.0195924	0.012637	-0.00112708
127.6	-0.0132398	0.0178451	0.019648	0.0125601	-0.00080143
127.8	-0.0125435	0.0185599	0.020263	0.013014	-0.00055473
128	-0.0124627	0.0185614	0.0204183	0.0130427	-0.00048736
128.2	-0.0120573	0.0184899	0.0208319	0.0130854	-3.259e-05
128.4	-0.0119843	0.0183992	0.0206581	0.0131283	-0.00046328
128.6	-0.0120616	0.0185571	0.0207126	0.0128977	-0.00082855
128.8	-0.0122224	0.0187323	0.0204136	0.0130069	-0.00074101
129	-0.0129291	0.0179456	0.019569	0.0124519	-0.00152509
129.2	-0.0126522	0.0179003	0.0194913	0.0127438	-0.00166775
129.4	-0.0123463	0.0182017	0.0196245	0.0128646	-0.00175901
129.6	-0.0121896	0.0178932	0.0197611	0.0128974	-0.00160414
129.8	-0.0127171	0.0173444	0.0195841	0.0126208	-0.00204869
130	-0.0127295	0.0173112	0.0199549	0.0127277	-0.00219744
130.2	-0.0122773	0.0175267	0.0201269	0.0128384	-0.00157439
130.4	-0.0125629	0.0172195	0.0197744	0.0124849	-0.00116885
130.6	-0.0127452	0.0165428	0.0199828	0.0125396	-0.00068418
130.8	-0.0129548	0.0164704	0.0202404	0.0123785	-0.00079735
131	-0.0137174	0.0161889	0.0205293	0.0118186	-0.00106596
131.2	-0.0136394	0.016726	0.0207135	0.0123575	-0.00080817
131.4	-0.0131545	0.0164525	0.0207096	0.01249	-0.00077411
131.6	-0.0131846	0.0167364	0.0206155	0.0122871	-0.00043503
131.8	-0.0132341	0.0170005	0.0202843	0.0124204	-0.00086225
132	-0.0141043	0.0162469	0.0194025	0.0119761	-0.00125606
132.2	-0.0138442	0.0167061	0.0192297	0.0118986	-0.00096192
132.4	-0.0136218	0.0172341	0.0188105	0.0123306	-0.00125691
132.6	-0.0132395	0.018253	0.0189954	0.0125932	-0.00100278
132.8	-0.0129023	0.0188897	0.0190492	0.0129405	-0.00038665
133	-0.0128629	0.019196	0.0189716	0.0128641	-0.00031401
133.2	-0.011746	0.0199918	0.0194185	0.0140081	0.00019962
133.4	-0.0119617	0.0196946	0.0191291	0.0138477	0.00037406
133.6	-0.0123503	0.019049	0.0188698	0.0136886	-2.447e-05
133.8	-0.0129975	0.0185515	0.0180787	0.0134708	-0.0005334
134	-0.0126573	0.018597	0.0180979	0.0139164	-0.0002152
134.2	-0.0125522	0.0183832	0.0177949	0.0137364	-0.00027801
134.4	-0.0128696	0.0177516	0.0179319	0.0139652	-0.00036394
134.6	-0.0126909	0.0173036	0.0182614	0.0139887	-0.00045817
134.8	-0.0126599	0.0171914	0.0184857	0.0137217	-0.00087474
135	-0.0127333	0.0164977	0.018416	0.0137618	-0.00085978
135.2	-0.0123094	0.0166452	0.0185047	0.013873	-0.00061403
135.4	-0.0126844	0.0162033	0.0182493	0.0137478	-0.00069652
135.6	-0.0132951	0.0161299	0.0179579	0.0132586	-0.00067455
135.8	-0.0138365	0.0162142	0.0176454	0.0134755	-0.0009172
136	-0.0143349	0.0159098	0.0176674	0.0136281	-0.0007056
136.2	-0.0139066	0.0168152	0.0185226	0.0139783	-8.096e-05
136.4	-0.0134939	0.0175833	0.0186725	0.0141842	2.213e-05
136.6	-0.013043	0.0189049	0.0190749	0.0142558	0.00092548
136.8	-0.0135987	0.0186391	0.0190329	0.0141948	0.00094234
137	-0.0134394	0.0183862	0.0188766	0.0139765	0.00043038
137.2	-0.0137584	0.0182328	0.0188459	0.0139539	0.00044967
137.4	-0.0145884	0.0179379	0.0185985	0.0134551	0.00029289
137.6	-0.0148124	0.0179415	0.0185454	0.0130245	-0.00057918
137.8	-0.0147863	0.0182357	0.0184566	0.0130256	-0.00091164
138	-0.0145362	0.0187327	0.0190492	0.0133922	-0.00068305
138.2	-0.0139823	0.0189777	0.01936	0.0127558	-0.00082638
138.4	-0.0135771	0.0190431	0.019985	0.0130197	-0.00065199
138.6	-0.0132073	0.0189524	0.0199859	0.0124542	-0.00071069
138.8	-0.0133101	0.0187877	0.0201085	0.0125149	-0.00083927
139	-0.0126916	0.0190773	0.0203652	0.0131268	-0.00027697
139.2	-0.0128597	0.0192151	0.0204063	0.0127889	-0.0005209
139.4	-0.0130448	0.0188167	0.019928	0.0130269	-0.0002811
139.6	-0.0131543	0.0186684	0.0196565	0.0134132	-0.0003534
139.8	-0.0127205	0.0186622	0.0202216	0.0139798	-0.00023577
140	-0.0124553	0.0186496	0.0200653	0.0143741	-7.55e-05
140.2	-0.0121912	0.0193725	0.0203965	0.0148198	0.00063813
140.4	-0.0116924	0.0198538	0.0200194	0.0149488	0.00099642
140.6	-0.0116641	0.0197959	0.0199619	0.0148943	0.00152187
140.8	-0.0124355	0.0188488	0.0194702	0.0146711	0.00118205
141	-0.0123533	0.0184399	0.0194005	0.0143774	0.00121422
141.2	-0.0128166	0.0183032	0.0195161	0.0144701	0.00146091
141.4	-0.0126555	0.0183169	0.0195681	0.0144578	0.00122585
141.6	-0.0126358	0.0181016	0.0194397	0.014204	0.0007694
141.8	-0.0127176	0.0187589	0.0191461	0.0138278	0.00077462
142	-0.0128684	0.0186684	0.0190434	0.0134544	0.00085983
142.2	-0.0124493	0.0186745	0.0190089	0.0131624	0.00070094
142.4	-0.0125393	0.0182715	0.01884	0.0134967	0.00075775
142.6	-0.0125149	0.0190051	0.0190804	0.0136953	0.00082315
142.8	-0.0126614	0.0194694	0.0192245	0.0136394	0.00055588
143	-0.0127895	0.0194204	0.018881	0.0129146	0.00018741
143.2	-0.013782	0.0187591	0.0180997	0.0117431	-0.00092726
143.4	-0.0139055	0.018329	0.0172695	0.0115354	-0.0009816
143.6	-0.013838	0.0186518	0.0174574	0.0118169	-0.0013257
143.8	-0.013703	0.0190324	0.0182199	0.0121045	-0.00117842
144	-0.0136218	0.018816	0.0178377	0.0123431	-0.00091492
144.2	-0.0136461	0.0188561	0.018262	0.012766	-0.00076723
144.4	-0.0129628	0.0185783	0.0184054	0.0124677	-0.0007301
144.6	-0.0131825	0.017967	0.0183114	0.0125317	-0.00111832
144.8	-0.0129181	0.0178987	0.018649	0.0131	-0.00089434
145	-0.0120979	0.0183753	0.0192311	0.0136474	-0.00073346
145.2	-0.0119594	0.0181685	0.0195495	0.0142545	-0.00085553
145.4	-0.011882	0.0182876	0.0193769	0.0144338	-0.00095449
145.6	-0.0121657	0.017896	0.0188176	0.0144268	-0.00130685
145.8	-0.0125112	0.0178393	0.0183598	0.0139412	-0.00156562
146	-0.0125272	0.0176311	0.0188081	0.0144311	-0.00101815
146.2	-0.0127425	0.0176166	0.0187594	0.0143263	-0.00096278
146.4	-0.0129127	0.0171536	0.0187963	0.0141179	-0.00084727
146.6	-0.0128939	0.0178043	0.0193839	0.0143807	-0.00063693
146.8	-0.0129552	0.0178331	0.0194707	0.014031	-0.00069053
147	-0.0131777	0.0176952	0.0194194	0.0136516	-0.0007536
147.2	-0.0133391	0.017543	0.0192128	0.0136383	-0.00100056
147.4	-0.0131373	0.0177132	0.0191211	0.0139812	-0.00093207
147.6	-0.0133839	0.0183715	0.020166	0.0142949	-0.00056056
147.8	-0.0136916	0.0182232	0.020209	0.0144973	-0.00028083
148	-0.013214	0.0182464	0.0200815	0.0148962	0.0003211
148.2	-0.0129392	0.0189078	0.0208394	0.0155568	0.00047711
148.4	-0.012338	0.0192384	0.0212301	0.0155999	0.00059536
148.6	-0.012345	0.0193342	0.0213267	0.0160769	0.00038522
148.8	-0.0115258	0.020101	0.0220628	0.0164883	0.00101075
149	-0.0112711	0.0201683	0.0220173	0.0164917	0.00034491
149.2	-0.0118972	0.0196973	0.0217541	0.0159518	8.68e-06
149.4	-0.011325	0.0199539	0.0216987	0.0158974	0.00033283
149.6	-0.0115493	0.0198335	0.0214979	0.0153828	7.2e-07
149.8	-0.0118087	0.0195378	0.0213163	0.014135	-0.00015847
150	-0.0118959	0.0197519	0.0216348	0.0142744	0.00041718
150.2	-0.0118346	0.0194776	0.0214778	0.013708	6.674e-05
150.4	-0.0114101	0.0197943	0.0223056	0.0141113	0.00031123
150.6	-0.0110773	0.0203447	0.0225348	0.014878	0.00091031
150.8	-0.0109277	0.0207688	0.022753	0.0148563	0.00099635
151	-0.0112204	0.0206826	0.0223918	0.0149573	0.00078813
151.2	-0.0114166	0.0202817	0.0219993	0.0150279	0.00032313
151.4	-0.0115714	0.0203551	0.0217438	0.0148793	0.00047426
151.6	-0.0122885	0.0203851	0.0217085	0.0149188	0.00066817
151.8	-0.0121122	0.0201479	0.021017	0.0155408	0.0007362
152	-0.0117084	0.0207203	0.0214558	0.0164637	0.00140877
152.2	-0.0116365	0.0209466	0.0216774	0.016855	0.00146546
152.4	-0.0118312	0.0204637	0.0211226	0.0168962	0.00104731
152.6	-0.0121346	0.0202405	0.0211117	0.0170523	0.00109067
152.8	-0.0122594	0.0203306	0.0213515	0.0169277	0.00098246
153	-0.0120965	0.019984	0.0214446	0.0170139	0.00070019
153.2	-0.0122848	0.0202191	0.0221099	0.0169295	0.00105116
153.4	-0.0119269	0.0197152	0.0222829	0.0168249	0.00125334
153.6	-0.0121205	0.0201451	0.022361	0.016239	0.00124903
153.8	-0.0119485	0.020088	0.0223921	0.01585	0.00135417
154	-0.0121482	0.0197672	0.0224937	0.0162058	0.0012078
154.2	-0.0115675	0.0198397	0.0226332	0.0162414	0.00096695
154.4	-0.0114841	0.0199411	0.022839	0.0162251	0.00105889
154.6	-0.0115381	0.0199716	0.0223605	0.0159009	0.00143733
154.8	-0.0117089	0.02024	0.0223333	0.0152761	0.00103338
155	-0.0117636	0.0199791	0.0220771	0.0149748	0.0009809
155.2	-0.0119683	0.0197292	0.0215974	0.0140703	0.00055651
155.4	-0.0124065	0.0197234	0.0213965	0.0135745	0.00062111
155.6	-0.0129912	0.0194524	0.0208936	0.0134957	0.00036467
155.8	-0.0129234	0.0192838	0.0205962	0.0135196	0.00026454
156	-0.013277	0.0194488	0.0204147	0.0134665	0.00051425
156.2	-0.0136948	0.0198761	0.0202872	0.0135147	0.00067701
156.4	-0.0140499	0.0200803	0.0201573	0.0135266	0.00064366
156.6	-0.0143491	0.0201641	0.0204585	0.0131095	0.0003239
156.8	-0.0141268	0.020346	0.0208407	0.0133122	0.00019996
157	-0.0139245	0.0203708	0.0211887	0.0137159	0.00023543
157.2	-0.0144141	0.0202742	0.0213395	0.0135014	0.00013612
157.4	-0.0144244	0.0200308	0.0211442	0.0134348	-3.649e-05
157.6	-0.0136427	0.020912	0.02159	0.0139909	0.00032813
157.8	-0.0134859	0.0207789	0.0218913	0.0144684	-6.147e-05
158	-0.0130648	0.0206688	0.0222465	0.01505	7.84e-05
158.2	-0.0123421	0.0210707	0.0228314	0.0153795	0.00029209
158.4	-0.0119027	0.0215865	0.0233063	0.0156394	0.00075978
158.6	-0.0116794	0.0222279	0.0236462	0.0154114	0.00154519
158.8	-0.0114724	0.0226835	0.0240181	0.0153968	0.00171106
159	-0.0115269	0.0229207	0.0243864	0.015645	0.00241307
159.2	-0.0112167	0.0226417	0.0241385	0.0156332	0.00234793
159.4	-0.0109121	0.0230879	0.0244876	0.0163261	0.0029571
159.6	-0.011067	0.0229247	0.0241256	0.0162179	0.00321615
159.8	-0.0112263	0.0228861	0.0240172	0.0160895	0.00318362
160	-0.0109961	0.0231147	0.0238235	0.016409	0.0038267
160.2	-0.0107515	0.0237655	0.0239619	0.016854	0.0042572
160.4	-0.0106149	0.0237373	0.0236413	0.0169732	0.00424584
160.6	-0.0105813	0.023673	0.0234663	0.0171096	0.00372115
160.8	-0.0105303	0.0234608	0.0234845	0.0173465	0.00370446
161	-0.0110776	0.0230343	0.0230235	0.017551	0.00365238
161.2	-0.0112062	0.0225949	0.0229056	0.0175513	0.00343169
161.4	-0.011454	0.0225477	0.0231079	0.0175848	0.0030553
161.6	-0.0112871	0.0221027	0.0225167	0.0178627	0.00259876
161.8	-0.0117512	0.0219429	0.0225956	0.0176577	0.00176843
162	-0.0122524	0.0213619	0.022099	0.016855	0.00131109
162.2	-0.0124396	0.0214908	0.0223705	0.0168813	0.00070674
162.4	-0.0124621	0.021533	0.0224272	0.0167538	0.00048434
162.6	-0.0125863	0.0211665	0.0219611	0.0160723	0.00021981
162.8	-0.0131245	0.0209935	0.0216394	0.0158849	-0.00021644
163	-0.0130674	0.0208793	0.0218181	0.0160761	-0.00037082
163.2	-0.0125485	0.0205984	0.021567	0.0157049	-0.00101929
163.4	-0.0122724	0.0211077	0.0217106	0.0155457	-0.00115762
163.6	-0.0129286	0.0206759	0.0211704	0.0151889	-0.0012733
163.8	-0.0124971	0.0209327	0.0212418	0.0157293	-0.00090632
164	-0.0117317	0.0217132	0.0211709	0.0163099	-0.00012198
164.2	-0.0112857	0.0223782	0.0214384	0.0169518	0.00022719
164.4	-0.0109881	0.0227047	0.0213375	0.0173027	0.00052488
164.6	-0.0107665	0.0226567	0.0215961	0.0172306	0.00080828
164.8	-0.0104194	0.0226852	0.0218828	0.0175281	0.00148693
165	-0.0107227	0.0224682	0.0218553	0.0178777	0.00186874
165.2	-0.0102723	0.022326	0.0221959	0.018146	0.00217358
165.4	-0.0102148	0.0223245	0.0224457	0.0184982	0.00251395
165.6	-0.00995586	0.0218038	0.022339	0.0182883	0.00278576
165.8	-0.00985098	0.0222162	0.0233462	0.0183185	0.00277722
166	-0.00982581	0.0220462	0.0235048	0.0182424	0.00288242
166.2	-0.00937363	0.0222916	0.0239429	0.0187936	0.00288206
166.4	-0.00934408	0.0220471	0.0237197	0.0183938	0.00257769
166.6	-0.00992025	0.0215199	0.0236004	0.0176742	0.00213527
166.8	-0.0105208	0.0214433	0.0238692	0.0175582	0.00218875
167	-0.0104845	0.0212958	0.0240801	0.017529	0.00194739
167.2	-0.0106581	0.0213147	0.0237712	0.0168185	0.00155602
167.4	-0.0110043	0.0210366	0.0232999	0.0166131	0.00146415
167.6	-0.0113112	0.0211811	0.0230881	0.0168593	0.00158577
167.8	-0.0113645	0.0217258	0.0231975	0.0169856	0.00172464
168	-0.011862	0.0218969	0.0229676	0.0166227	0.00137148
168.2	-0.0122187	0.0222001	0.0230472	0.0165604	0.0009996
168.4	-0.0131008	0.0219801	0.0224	0.0160375	0.00039619
168.6	-0.0133389	0.0217001	0.0224129	0.0156535	0.00026368
168.8	-0.0137953	0.0214462	0.021774	0.0154732	-3.129e-05
169	-0.0142402	0.021126	0.0216435	0.0149551	-0.00031036
169.2	-0.0137387	0.020989	0.0220059	0.0152078	8.403e-05
169.4	-0.0135887	0.0209866	0.0223289	0.0148128	0.00010449
169.6	-0.0133301	0.0207538	0.0228262	0.0144437	0.00019969
169.8	-0.0128316	0.021133	0.0229639	0.0143575	6.495e-05
170	-0.012235	0.020974	0.0227804	0.0141456	0.00013991
170.2	-0.0121379	0.0209002	0.0227425	0.0136566	-0.00015776
170.4	-0.0121386	0.0208984	0.0229899	0.0132309	-0.00030288
170.6	-0.0127453	0.0203307	0.0228246	0.0129087	-0.00034515
170.8	-0.012728	0.0200827	0.0224538	0.0130393	-0.00019921
171	-0.0125588	0.0200509	0.0220601	0.0131026	-0.00028167
171.2	-0.0126022	0.0197844	0.0215614	0.0126306	-0.00052279
171.4	-0.0126616	0.0200092	0.0218464	0.0129458	-0.00022887
171.6	-0.012435	0.0204814	0.0222319	0.0135119	-0.00017271
171.8	-0.0128378	0.0205457	0.0223805	0.0137146	0.00027246
172	-0.0128613	0.0206769	0.0225221	0.0142617	0.00064194
172.2	-0.013077	0.0212112	0.0223338	0.0148929	0.00088486
172.4	-0.0132472	0.0206376	0.0219579	0.0149523	0.00093515
172.6	-0.012657	0.020872	0.0223171	0.0154842	0.00142611
172.8	-0.0128331	0.0211463	0.0221436	0.0159067	0.00160711
173	-0.0125125	0.0215114	0.0226136	0.0164857	0.00188129
173.2	-0.0117858	0.0220644	0.0230616	0.0173565	0.00246653
173.4	-0.0112826	0.0225942	0.023305	0.0174312	0.00243886
173.6	-0.0110927	0.0227368	0.0236772	0.0177159	0.00265221
173.8	-0.0106179	0.0232389	0.0234354	0.0174723	0.0027067
174	-0.0102782	0.0234239	0.0240833	0.0180319	0.00281646
174.2	-0.0104144	0.0237332	0.0241382	0.0180007	0.0025572
174.4	-0.010501	0.0240153	0.0241474	0.0181137	0.00255899
174.6	-0.0110086	0.0235498	0.0238084	0.0176916	0.00223144
174.8	-0.0113956	0.0231337	0.0237501	0.0172145	0.00172666
175	-0.0117239	0.0226712	0.023637	0.0164228	0.00078706
175.2	-0.012107	0.0221828	0.0236189	0.0158482	0.00050244
175.4	-0.0127039	0.022107	0.0238541	0.0154866	0.00066527
175.6	-0.0126692	0.0218421	0.0238099	0.0153738	0.00063137
175.8	-0.0126391	0.0217224	0.0240578	0.0154913	0.0011217
176	-0.0130024	0.021216	0.0234845	0.0152722	0.00088333
176.2	-0.0134588	0.0204566	0.0228453	0.0149264	0.00039386
176.4	-0.0136701	0.0194808	0.0221134	0.0142988	-5.283e-05
176.6	-0.0132626	0.0196409	0.0221766	0.0143643	0.0001541
176.8	-0.013733	0.0198702	0.0222074	0.0149962	0.00029492
177	-0.0142109	0.0198815	0.0221212	0.0150243	0.00011494
177.2	-0.0138025	0.0201479	0.0218595	0.0149678	0.00023154
177.4	-0.0135897	0.0204256	0.0220225	0.0148002	5.87e-06
177.6	-0.0135873	0.0206748	0.0218473	0.014929	0.00015387
177.8	-0.0133069	0.0207946	0.0220399	0.0147594	0.0003001
178	-0.0131592	0.0216236	0.0227021	0.0155507	0.00038954
178.2	-0.0127232	0.022098	0.0222451	0.0153677	0.00057338
178.4	-0.0122577	0.0227753	0.0224383	0.01584	0.00137707
178.6	-0.012483	0.0224262	0.0224441	0.0152199	0.00093327
178.8	-0.012278	0.0228892	0.0230235	0.0154666	0.00092359
179	-0.0122293	0.0231717	0.0231953	0.0153124	0.00100519
179.2	-0.0119854	0.0236396	0.023577	0.0160191	0.00188853
179.4	-0.0114028	0.0238532	0.0238401	0.0160336	0.00232141
179.6	-0.010263	0.0244618	0.0244332	0.0171502	0.00276192
179.8	-0.00951924	0.0245302	0.0244644	0.0176487	0.00336156
180	-0.0097523	0.0239891	0.024056	0.0177915	0.00298667
180.2	-0.00952436	0.0236904	0.0245658	0.0182184	0.00305833
180.4	-0.00952978	0.0236996	0.0249131	0.018423	0.00320301
180.6	-0.00943271	0.0240334	0.0258157	0.0187314	0.00346419
180.8	-0.0100424	0.0238777	0.0258739	0.0188195	0.00311748
181	-0.0101261	0.0235173	0.0256051	0.018587	0.00305474
181.2	-0.0100235	0.0235612	0.0250499	0.0181554	0.00267781
181.4	-0.0101908	0.0234058	0.0248183	0.0179859	0.00212196
181.6	-0.010645	0.0231352	0.0243515	0.0176626	0.00168103
181.8	-0.0114584	0.0221384	0.0238723	0.016873	0.00068899
182	-0.0115149	0.0222035	0.0231446	0.0171227	0.00053355
182.2	-0.0114988	0.022046	0.0224634	0.0168201	0.00046937
182.4	-0.0120574	0.0221354	0.0221935	0.0164976	0.00042027
182.6	-0.0129882	0.0220417	0.0220158	0.0156513	-0.00033489
182.8	-0.0128236	0.022836	0.0223916	0.015916	0.00026095
183	-0.0127144	0.0228624	0.0224144	0.0156058	0.00075894
183.2	-0.0127351	0.0224445	0.0216311	0.015066	0.00061313
183.4	-0.0122728	0.0223954	0.0220104	0.0147708	0.00075539
183.6	-0.0116861	0.0228566	0.0225018	0.0154391	0.00109149
183.8	-0.0115401	0.0224094	0.0227692	0.0151992	0.00134152
184	-0.0115977	0.0223894	0.0233684	0.0154936	0.00129976
184.2	-0.0114404	0.0225196	0.023984	0.0156277	0.00116711
184.4	-0.0113483	0.0225103	0.0244794	0.0155923	0.0015242
184.6	-0.0109239	0.0227852	0.0251787	0.0154811	0.00162992
184.8	-0.010209	0.0227658	0.025297	0.0157468	0.00171882
185	-0.00983849	0.022581	0.0252046	0.0161312	0.00180179
185.2	-0.00998986	0.0226039	0.0253277	0.0158712	0.00129523
185.4	-0.00967466	0.0224822	0.0258409	0.0159788	0.00103295
185.6	-0.00996164	0.0224276	0.0259171	0.0158521	0.00100146
185.8	-0.0104117	0.0217379	0.0256612	0.0159355	0.0005978
186	-0.0102328	0.0219127	0.0254061	0.0160516	0.00061723
186.2	-0.0103207	0.022317	0.0253475	0.016333	0.00049172
186.4	-0.0112683	0.021885	0.0247047	0.0161145	0.00012596
186.6	-0.0113224	0.022483	0.0248334	0.0166574	0.00022317
186.8	-0.0111873	0.0228455	0.0245144	0.0164774	0.00057032
187	-0.0115187	0.0224162	0.0236273	0.0160808	0.00032886
187.2	-0.0121096	0.0218058	0.0226983	0.0160895	0.00010683
187.4	-0.012139	0.0218342	0.0227787	0.0167282	0.00028719
187.6	-0.0124119	0.0218981	0.0226175	0.0170475	0.00041644
187.8	-0.0122355	0.0219602	0.0227149	0.01726	0.00073528
188	-0.0126038	0.0222128	0.0223799	0.0175277	0.00081746
188.2	-0.0126159	0.0223107	0.0225439	0.0176043	0.00089789
188.4	-0.0122923	0.0227755	0.0230209	0.0177609	0.00156714
188.6	-0.0117249	0.0231922	0.0233619	0.0178369	0.00176012
188.8	-0.0111177	0.0237494	0.02391	0.0184057	0.00190053
189	-0.0109913	0.0237671	0.0240567	0.018142	0.00187783
189.2	-0.0106867	0.0245655	0.0249099	0.0183088	0.00225401
189.4	-0.0107936	0.0246107	0.0252514	0.0181309	0.00214835
189.6	-0.0109467	0.0247714	0.0252081	0.0180044	0.00243628
189.8	-0.0106918	0.0248171	0.0256341	0.0180694	0.0024339
190	-0.0102918	0.0248189	0.025677	0.0178832	0.00221904
190.2	-0.0101486	0.0249032	0.0258799	0.0181232	0.00210469
190.4	-0.0104438	0.0241659	0.02574	0.0180842	0.0016336
190.6	-0.0100153	0.0244677	0.0255552	0.0180147	0.00175569
190.8	-0.0100179	0.0239585	0.0248964	0.0173989	0.00137723
191	-0.0100792	0.023306	0.0247678	0.0175711	0.00155898
191.2	-0.0100967	0.0225845	0.0241036	0.0175188	0.00128606
191.4	-0.0103654	0.0225218	0.023759	0.0175267	0.00120061
191.6	-0.0106462	0.0228259	0.0240261	0.0171668	0.00132351
191.8	-0.0104451	0.0231463	0.0240704	0.0172437	0.00140682
192	-0.0109688	0.0227333	0.0234653	0.0168586	0.00110742
192.2	-0.0101877	0.0230866	0.024153	0.016989	0.00159032
192.4	-0.0101711	0.0234169	0.0240267	0.0170051	0.00158218
192.6	-0.00986585	0.0239113	0.0243416	0.0171337	0.00190344
192.8	-0.00998031	0.024144	0.0244335	0.0175741	0.00199447
193	-0.0101313	0.0242952	0.0243792	0.0174455	0.00227283
193.2	-0.00983565	0.0246462	0.0245027	0.0176203	0.00259002
193.4	-0.00973672	0.0250042	0.0247135	0.0173894	0.00262047
193.6	-0.00969195	0.0254384	0.0248054	0.0172364	0.00276253
193.8	-0.00990864	0.02542	0.025065	0.0172224	0.00243869
194	-0.00995908	0.0254731	0.0252407	0.0173608	0.00224188
194.2	-0.0101409	0.0252817	0.0251686	0.0174234	0.00184032
194.4	-0.010529	0.0245787	0.0246054	0.0169736	0.00150156
194.6	-0.0107633	0.0240921	0.0241707	0.0165009	0.00143332
194.8	-0.0111739	0.0234905	0.0242	0.0163513	0.00097599
195	-0.0111511	0.023385	0.0245905	0.0162633	0.00114678
195.2	-0.011662	0.0226605	0.0235071	0.0158564	0.00046709
195.4	-0.011834	0.0225233	0.0237327	0.0158916	0.00043098
195.6	-0.0122832	0.0221865	0.02346	0.0155109	0.00028596
195.8	-0.011906	0.0218823	0.0234474	0.0156953	9.706e-05
196	-0.0115137	0.0215192	0.023412	0.0156326	0.0001001
196.2	-0.0108835	0.0217757	0.0238793	0.016077	0.00038883
196.4	-0.01093	0.0213552	0.023963	0.0160985	0.0004215
196.6	-0.0103065	0.0215075	0.0244833	0.0167276	0.00106916
196.8	-0.0103438	0.0213543	0.0241408	0.0167764	0.00097246
197	-0.0102395	0.0214721	0.0241416	0.016623	0.00083366
197.2	-0.0103212	0.0220964	0.0239289	0.0167413	0.0010791
197.4	-0.0101856	0.0229887	0.0241985	0.0170071	0.00135069
197.6	-0.0104013	0.0231972	0.0242613	0.0171154	0.00132169
197.8	-0.0107506	0.023445	0.0246143	0.0171832	0.00123689
198	-0.0109314	0.0235664	0.024595	0.0169035	0.00158456
198.2	-0.011528	0.0232662	0.0239086	0.016314	0.00134288
198.4	-0.012385	0.0230084	0.0236062	0.0155662	0.00113668
198.6	-0.0126177	0.0227544	0.023514	0.0154822	0.0012194
198.8	-0.0132199	0.022785	0.0233299	0.0152427	0.00088621
199	-0.0137918	0.0225992	0.0231972	0.0149599	0.00077013
199.2	-0.0145172	0.0220594	0.0223031	0.0142958	0.00010535
199.4	-0.0145896	0.022022	0.0225146	0.0141342	-0.00020473
199.6	-0.0152982	0.021841	0.0222093	0.0139095	-0.00047989
199.8	-0.0150372	0.0216085	0.022449	0.0141154	-0.00079919
200	-0.01451	0.021751	0.0227553	0.0144422	-0.00049829
200.2	-0.014146	0.0216965	0.0228861	0.0150542	-0.00048391
200.4	-0.0140706	0.0214942	0.0225575	0.0149673	-0.0004591
200.6	-0.013526	0.021979	0.0228705	0.0154472	-0.00020014
200.8	-0.0131091	0.0226588	0.0229855	0.0157151	-8.956e-05
201	-0.0129379	0.0228562	0.0232483	0.015708	8.317e-05
201.2	-0.0126079	0.0241658	0.0238318	0.0167391	0.00078006
201.4	-0.0113077	0.0247061	0.0244269	0.0175848	0.00137711
201.6	-0.0107287	0.0250999	0.0252737	0.017862	0.00190501
201.8	-0.0106442	0.0250283	0.0254076	0.0177746	0.0017034
202	-0.0105686	0.0251226	0.0256501	0.0176116	0.00205129
202.2	-0.0103011	0.0254349	0.0258229	0.0179195	0.00199699
202.4	-0.0100978	0.0256164	0.0262822	0.0178671	0.00208078
202.6	-0.010414	0.0258803	0.0262486	0.0179646	0.00214354
202.8	-0.0110015	0.0259724	0.0262743	0.0177503	0.00184203
203	-0.0116308	0.0256807	0.0263	0.0173907	0.00121583
203.2	-0.0122938	0.0252876	0.026191	0.0165519	0.00031767
203.4	-0.0132438	0.0248644	0.0261817	0.016242	-0.00020939
203.6	-0.0138574	0.0243974	0.0255954	0.0156994	-0.00067947
203.8	-0.0136614	0.0244145	0.0256973	0.0160309	-0.00047607
204	-0.0134487	0.0247843	0.0257734	0.0163788	-2.784e-05
204.2	-0.0136428	0.0248772	0.0254512	0.0159506	-0.00028394
204.4	-0.0139526	0.0246916	0.0253075	0.0157535	-0.0002829
204.6	-0.0135681	0.0248677	0.0259812	0.0159894	5.274e-05
204.8	-0.0132009	0.0252191	0.0261284	0.0163442	0.000533
205	-0.0128999	0.0252924	0.0263324	0.0168823	0.0009478
205.2	-0.0125553	0.0256734	0.0268447	0.0179634	0.00162792
205.4	-0.0121681	0.0252123	0.0270896	0.0183545	0.00211858
205.6	-0.0121561	0.0247345	0.0274323	0.018118	0.00239034
205.8	-0.0123163	0.0244475	0.0273066	0.0182246	0.00227834
206	-0.0120539	0.0242808	0.0273684	0.0184521	0.00267096
206.2	-0.0114401	0.0242805	0.0273931	0.0190343	0.00311637
206.4	-0.0115359	0.0238192	0.0273995	0.0188756	0.00319911
206.6	-0.0120522	0.0229474	0.0264322	0.0183668	0.00245097
206.8	-0.0118973	0.0225975	0.0264386	0.018473	0.0021629
207	-0.012598	0.0219814	0.0256154	0.0173498	0.00123073
207.2	-0.0129623	0.0217656	0.02491	0.0166019	0.00063556
207.4	-0.0130465	0.0221184	0.0244309	0.0166063	0.00034461
207.6	-0.0120936	0.0230183	0.0243558	0.0172118	0.00096332
207.8	-0.0121288	0.0239026	0.0247064	0.0176584	0.00116492
208	-0.0122568	0.0244841	0.0245278	0.0175844	0.00085017
208.2	-0.0124663	0.0247065	0.024148	0.0169822	0.00063026
208.4	-0.0125749	0.024911	0.0245502	0.017062	0.00047373
208.6	-0.0124437	0.0252173	0.0246187	0.0168671	0.00077231
208.8	-0.0123685	0.0257481	0.0250897	0.0174202	0.00142234
209	-0.0119377	0.0263082	0.0256429	0.0180623	0.00200606
209.2	-0.0120877	0.026681	0.0264736	0.0182767	0.00240043
209.4	-0.0121485	0.0263307	0.0267192	0.0183713	0.002494
209.6	-0.0119028	0.0264305	0.0269835	0.0183398	0.00258961
209.8	-0.0121374	0.0262241	0.0270356	0.0179342	0.00267929
210	-0.01159	0.0256621	0.0268037	0.0178549	0.00256784
210.2	-0.0113878	0.0249789	0.0268145	0.0174229	0.0023685
210.4	-0.0115133	0.0244147	0.0265093	0.0168581	0.00176338
210.6	-0.0117671	0.0239115	0.0258499	0.0165876	0.00089805
210.8	-0.011775	0.0241256	0.0260872	0.0166665	0.00060652
211	-0.01183	0.0240721	0.0251579	0.0158363	-0.00012175
211.2	-0.011382	0.0246177	0.0252196	0.0165392	0.0002805
211.4	-0.0110889	0.0253149	0.0255264	0.0171033	0.0009048
211.6	-0.0105011	0.0259173	0.0259251	0.0179143	0.00156229
211.8	-0.010434	0.0263038	0.0263618	0.0181024	0.00169271
212	-0.0103149	0.0260699	0.0260521	0.0177839	0.00150261
212.2	-0.0105658	0.025728	0.0260101	0.0173459	0.00172016
212.4	-0.0105858	0.0258872	0.0267853	0.0177617	0.00225509
212.6	-0.0107706	0.0258593	0.0269647	0.018097	0.00271984
212.8	-0.0107455	0.0263532	0.0272998	0.0187392	0.00341607
213	-0.0106	0.0267539	0.0273419	0.0189365	0.00331774
213.2	-0.0106677	0.0267633	0.0273493	0.0187393	0.00313862
213.4	-0.0104154	0.0261188	0.0269403	0.0186272	0.00314075
213.6	-0.0105629	0.0261985	0.0267145	0.0183487	0.00284992
213.8	-0.0112244	0.0256447	0.0263506	0.0173615	0.00266017
214	-0.0111832	0.0252453	0.0259328	0.0174215	0.0022238
214.2	-0.0116155	0.0246646	0.0256924	0.0168705	0.00157946
214.4	-0.0119734	0.0246155	0.0255419	0.0168002	0.00118782
214.6	-0.011841	0.024286	0.0254485	0.0169587	0.00073976
214.8	-0.0118584	0.0242386	0.0253242	0.0165604	0.00043523
215	-0.0111341	0.0246883	0.0254848	0.0170612	0.00084229
215.2	-0.0108385	0.0246995	0.0259394	0.0173015	0.00130194
215.4	-0.0102596	0.0250154	0.0263675	0.0173857	0.00168079
215.6	-0.00934777	0.0252855	0.0268936	0.0180133	0.00198912
215.8	-0.00897762	0.0255342	0.0274132	0.018243	0.00232946
216	-0.00894748	0.0253397	0.0272643	0.0178388	0.0019842
216.2	-0.00851159	0.0256559	0.0279737	0.0181553	0.00244947
216.4	-0.00859891	0.0257786	0.0286171	0.01867	0.00287217
216.6	-0.00817576	0.0261996	0.0287438	0.0189683	0.00286444
216.8	-0.00834202	0.0262384	0.0282451	0.0186018	0.00262801
217	-0.00808371	0.0264774	0.0282908	0.0189043	0.00242671
217.2	-0.0081792	0.0267123	0.0281888	0.018979	0.00262732
217.4	-0.00837899	0.026683	0.0283023	0.0190401	0.00288104
217.6	-0.00886966	0.026806	0.0284817	0.0189021	0.00258365
217.8	-0.00914854	0.0264075	0.028128	0.0183197	0.00236041
218	-0.00969511	0.0258379	0.0275971	0.0184503	0.00198569
218.2	-0.0102864	0.0252981	0.0272025	0.0178356	0.00157343
218.4	-0.0108991	0.0243991	0.0268326	0.0175182	0.00115833
218.6	-0.0111159	0.024007	0.0264632	0.0172216	0.00075871
218.8	-0.0113141	0.0241982	0.0264442	0.0170856	0.00075719
219	-0.0114732	0.0242848	0.0263301	0.0173595	0.00093264
219.2	-0.0115978	0.0240573	0.026058	0.0169242	0.00083356
219.4	-0.0118573	0.0240507	0.0256922	0.0166862	0.00084623
219.6	-0.0119498	0.0240612	0.025394	0.0163494	0.00048828
219.8	-0.0120765	0.0242433	0.0253588	0.0161829	0.00058423
220	-0.0112732	0.0248893	0.0260503	0.0167258	0.00105965
220.2	-0.0110588	0.0249387	0.0265671	0.0170113	0.00152453
220.4	-0.0108021	0.0257861	0.0266888	0.0176738	0.00191387
220.6	-0.0103655	0.0268552	0.0269685	0.0184097	0.0021072
220.8	-0.0100791	0.0274033	0.027227	0.0188804	0.00273172
221	-0.00949125	0.0278235	0.0280342	0.0198706	0.00333339
221.2	-0.00924963	0.0282735	0.0284333	0.019966	0.00375584
221.4	-0.00906334	0.0282917	0.0287095	0.0200222	0.00369721
221.6	-0.00893162	0.0284712	0.0290278	0.0202112	0.0032662
221.8	-0.0084607	0.0284885	0.0289616	0.0202346	0.00346415
222	-0.00887906	0.0282834	0.0287562	0.0201479	0.00332137
222.2	-0.00866798	0.0283248	0.0285667	0.0202161	0.00293568
222.4	-0.00875545	0.0278872	0.0285772	0.0199201	0.00268605
222.6	-0.00863626	0.0281749	0.0284765	0.0197685	0.00257468
222.8	-0.00853902	0.0282616	0.0283697	0.0197952	0.00274243
223	-0.00924193	0.0280294	0.0279065	0.0197578	0.00255789
223.2	-0.00968013	0.027585	0.0273107	0.018703	0.00219743
223.4	-0.0103727	0.0268616	0.026736	0.0184542	0.00170558
223.6	-0.00989245	0.0270994	0.0268228	0.0187837	0.00206638
223.8	-0.00949981	0.0268663	0.0267793	0.0192237	0.00266271
224	-0.00919022	0.0272302	0.0269278	0.0198001	0.00301171
224.2	-0.00908846	0.0268515	0.0265177	0.0194613	0.00303842
224.4	-0.00886552	0.0275221	0.0267769	0.0202705	0.00348261
224.6	-0.00887227	0.0277102	0.027473	0.0204327	0.00383278
224.8	-0.0087244	0.0277003	0.02763	0.0208023	0.00457429
225	-0.00881334	0.027418	0.0278057	0.0205416	0.00433634
225.2	-0.0088863	0.0274849	0.0281599	0.0206036	0.00440321
225.4	-0.00958009	0.0274966	0.0281948	0.0202503	0.00378334
225.6	-0.00966216	0.0277503	0.0284142	0.0201568	0.00366481
225.8	-0.00939713	0.0276459	0.0280701	0.0198783	0.00381873
226	-0.00995272	0.0276742	0.0277672	0.0193406	0.00308308
226.2	-0.0101076	0.0271563	0.0275168	0.0191898	0.00249098
226.4	-0.0103867	0.0269158	0.0279914	0.0187797	0.0024974
226.6	-0.0109642	0.0270129	0.0275733	0.018787	0.00196571
226.8	-0.0113226	0.0269649	0.0275417	0.0189932	0.0019698
227	-0.0119707	0.0265294	0.0271007	0.0188282	0.00151971
227.2	-0.012144	0.0259573	0.0265244	0.0184505	0.0014006
227.4	-0.0118434	0.025159	0.0264504	0.0190049	0.00117557
227.6	-0.0108106	0.0254869	0.0264913	0.0191923	0.0016789
227.8	-0.0106631	0.0249196	0.0262368	0.019125	0.00145406
228	-0.0104304	0.0252136	0.0264246	0.0191246	0.00129437
228.2	-0.00975332	0.0257399	0.02696	0.0194189	0.00152636
228.4	-0.00919379	0.0262941	0.0274121	0.0200825	0.00195278
228.6	-0.00869646	0.0265488	0.0276242	0.0196836	0.00239914
228.8	-0.00826828	0.026956	0.0281031	0.0199757	0.00346598
229	-0.00790158	0.0271408	0.0282352	0.0198435	0.00359688
229.2	-0.00816414	0.0273376	0.0285021	0.0199805	0.00363526
229.4	-0.00834339	0.0276419	0.0286693	0.0198329	0.00361709
229.6	-0.00787504	0.0279121	0.0287864	0.0197564	0.00392396
229.8	-0.00808944	0.0279535	0.0289253	0.0194883	0.0036884
230	-0.00868976	0.0277036	0.0288358	0.0192116	0.00331351
230.2	-0.00906567	0.0272133	0.0290392	0.0191395	0.00301941
230.4	-0.00890179	0.0275755	0.0295934	0.019651	0.00295229
230.6	-0.00925166	0.0273155	0.0295549	0.0196804	0.00290693
230.8	-0.00917417	0.0269243	0.0295963	0.0198746	0.00297225
231	-0.00927998	0.0265582	0.0294055	0.01982	0.00260853
231.2	-0.00914425	0.0259565	0.0292194	0.0196804	0.0027649
231.4	-0.00876617	0.0259088	0.0295242	0.019438	0.00252031
231.6	-0.00867695	0.0261828	0.0297686	0.0193983	0.00278789
231.8	-0.00902511	0.026066	0.02989	0.019537	0.00257534
232	-0.00909481	0.0264415	0.0297797	0.0195382	0.00255265
232.2	-0.00886868	0.0269413	0.0299488	0.0196309	0.00309437
232.4	-0.00862793	0.027097	0.0297354	0.0194283	0.00361819
232.6	-0.00901789	0.0272982	0.0295511	0.0191171	0.00421646
232.8	-0.00866577	0.027735	0.0296025	0.0195176	0.00481272
233	-0.00857333	0.0282441	0.029253	0.0197173	0.00468419
233.2	-0.00894453	0.0280791	0.0290999	0.019702	0.0043527
233.4	-0.00903885	0.0281326	0.0291742	0.0199967	0.00448053
233.6	-0.0090954	0.0284169	0.0290197	0.0196754	0.00463772
233.8	-0.00972004	0.0279997	0.0283455	0.0194463	0.00395795
234	-0.0099963	0.0274877	0.0279256	0.0191242	0.00357824
234.2	-0.00982623	0.0273971	0.0284426	0.0189425	0.0031501
234.4	-0.00897108	0.0271567	0.0285073	0.018926	0.00305472
234.6	-0.00904076	0.0270011	0.0284994	0.0191886	0.00287105
234.8	-0.00888683	0.0273904	0.0282057	0.0194184	0.00242625
235	-0.00881852	0.0275004	0.0285254	0.0196708	0.00242895
235.2	-0.00895872	0.0272814	0.0277803	0.0189209	0.00215561
235.4	-0.00897188	0.0278299	0.0280866	0.0192085	0.00218156
235.6	-0.00945757	0.0272508	0.0278919	0.0189338	0.00210141
235.8	-0.00961604	0.027379	0.0277672	0.0190727	0.00189928
236	-0.00980894	0.0275289	0.0279479	0.0190822	0.00193389
236.2	-0.00989577	0.0274485	0.0278849	0.0190028	0.00186051
236.4	-0.00935779	0.0282294	0.0277636	0.0196411	0.00229967
236.6	-0.00909487	0.0280935	0.0280036	0.0198513	0.00251637
236.8	-0.00872464	0.0279209	0.0279757	0.0203702	0.00250015
237	-0.00910368	0.0282573	0.0283649	0.0208953	0.00262287
237.2	-0.00942876	0.0277099	0.0280773	0.0208994	0.00248795
237.4	-0.00971727	0.0276657	0.0285162	0.0212214	0.00311896
237.6	-0.00934315	0.0278735	0.0287461	0.0207376	0.00345184
237.8	-0.00906465	0.0272246	0.0286954	0.0203244	0.00324204
238	-0.0089217	0.0270113	0.028799	0.0203369	0.00349678
238.2	-0.00875478	0.026984	0.0287766	0.0198754	0.00334302
238.4	-0.0083237	0.0272073	0.0287472	0.0197519	0.00363297
238.6	-0.00876614	0.0272221	0.0287615	0.0199419	0.00374937
238.8	-0.00851893	0.0278572	0.0290995	0.0197563	0.0046247
239	-0.00852972	0.0280953	0.0288972	0.0193638	0.00483576
239.2	-0.00871332	0.0280892	0.028374	0.0185775	0.00434198
239.4	-0.00893365	0.0279124	0.0284464	0.0184104	0.00409257
239.6	-0.00920851	0.0275044	0.0281596	0.0177703	0.00361404
239.8	-0.00955509	0.0276373	0.0283957	0.0175408	0.00346839
240	-0.0096754	0.0277357	0.0286867	0.0175356	0.00340218
240.2	-0.0101839	0.0271485	0.0280603	0.0170752	0.00250006
240.4	-0.00979219	0.0270921	0.0286683	0.0178731	0.00276543
240.6	-0.0100419	0.0265347	0.0290855	0.0178294	0.00216311
240.8	-0.0104073	0.0264596	0.0290844	0.0184185	0.0018628
241	-0.0111408	0.0261402	0.0292151	0.0184395	0.00113454
241.2	-0.0109475	0.0260748	0.0291345	0.0187032	0.0008851
241.4	-0.0107781	0.0261003	0.0297158	0.0194328	0.00102641
241.6	-0.0105947	0.0261316	0.0297529	0.0195341	0.00078332
241.8	-0.0101796	0.0261574	0.0298249	0.0202435	0.00105601
242	-0.0105022	0.0263178	0.0296133	0.0205421	0.00130887
242.2	-0.0106049	0.0262711	0.0293338	0.0202091	0.00136955
242.4	-0.0101963	0.0267241	0.0296331	0.0206112	0.00188675
242.6	-0.0102859	0.0267925	0.0292689	0.0203641	0.00226486
242.8	-0.00976108	0.0277868	0.0296007	0.0204484	0.00285914
243	-0.0100826	0.0277253	0.0289587	0.0199826	0.00218463
243.2	-0.0101912	0.0276886	0.0287699	0.0197662	0.0019951
243.4	-0.0102278	0.0276669	0.0284941	0.0198474	0.00223156
243.6	-0.0100204	0.0283105	0.0282151	0.0200493	0.00265361
243.8	-0.00991208	0.0285321	0.0285134	0.0200722	0.00319252
244	-0.0101337	0.028565	0.0281975	0.0198286	0.00333306
244.2	-0.0105813	0.0275462	0.0273829	0.0193957	0.00275183
244.4	-0.0103246	0.0271593	0.0275296	0.0195404	0.00305828
244.6	-0.0103889	0.0272429	0.0270789	0.0194463	0.00294516
244.8	-0.0105251	0.0268478	0.0264057	0.0193143	0.00259913
245	-0.0111295	0.0262019	0.0261945	0.0191959	0.00205268
245.2	-0.010684	0.0266369	0.0261172	0.0195512	0.00241979
245.4	-0.0108938	0.0263277	0.0263101	0.0197095	0.00248427
245.6	-0.0109799	0.0262075	0.0265034	0.0196948	0.00238071
245.8	-0.0108765	0.0260959	0.0270013	0.0197274	0.0025534
246	-0.0111208	0.0259817	0.027408	0.0196195	0.00263783
246.2	-0.0106169	0.0262034	0.0278179	0.0195224	0.00276452
246.4	-0.0105792	0.0261038	0.0284041	0.0194604	0.00291109
246.6	-0.0106115	0.0263828	0.0287929	0.0196503	0.0030871
246.8	-0.00999257	0.0269947	0.0297356	0.0206724	0.00362484
247	-0.00963075	0.0275785	0.0303737	0.0211904	0.0036842
247.2	-0.00866991	0.0285379	0.0311694	0.0221048	0.00435942
247.4	-0.00796504	0.0289453	0.0319179	0.0228864	0.00482146
247.6	-0.00809758	0.029575	0.0320027	0.0230816	0.00500488
247.8	-0.00841781	0.0295268	0.0320911	0.0227419	0.00513124
248	-0.00894029	0.0291042	0.0313396	0.0221166	0.00481175
248.2	-0.00916697	0.0285634	0.0310033	0.0223314	0.00389855
248.4	-0.00903713	0.0291619	0.0310719	0.0223235	0.00403614
248.6	-0.00893203	0.0294611	0.0308545	0.0226623	0.00378647
248.8	-0.00893051	0.0290281	0.0306957	0.0223668	0.00291119
249	-0.00936333	0.0285666	0.0305656	0.0220172	0.00251539
249.2	-0.00936538	0.0282739	0.0302058	0.0219073	0.00243547
249.4	-0.00970751	0.0281745	0.0301819	0.0216289	0.00188013
249.6	-0.00937817	0.0281342	0.0303591	0.0218359	0.00172492
249.8	-0.00976767	0.0278663	0.0301717	0.0211908	0.00123638
250	-0.00993432	0.0280578	0.030318	0.0212723	0.00155538
250.2	-0.00969565	0.0281713	0.0299148	0.0208796	0.00163423
250.4	-0.00959455	0.0281757	0.0301107	0.021415	0.00215426
250.6	-0.00895271	0.028609	0.0305245	0.0220701	0.00260301
250.8	-0.00851503	0.0288051	0.0307315	0.0222028	0.00306296
251	-0.00844928	0.0293096	0.0307094	0.0221394	0.00321229
251.2	-0.00826899	0.0293959	0.0304017	0.0220296	0.00336119
251.4	-0.00821687	0.0294357	0.030444	0.0218035	0.00369449
251.6	-0.00917395	0.029383	0.0296736	0.0212657	0.00350982
251.8	-0.00907722	0.029581	0.0296246	0.0211673	0.00379746
252	-0.00901873	0.0295511	0.0298102	0.0213558	0.00392358
252.2	-0.00867417	0.0299427	0.0307848	0.0217316	0.00410459
252.4	-0.00854245	0.0301743	0.0307869	0.0216205	0.00452959
252.6	-0.00836057	0.0297249	0.0312318	0.0219527	0.00426288
252.8	-0.00854947	0.0288105	0.0310696	0.0218852	0.00398268
253	-0.00891362	0.028765	0.0306546	0.0216605	0.00407657
253.2	-0.00875474	0.0289061	0.0309983	0.0219833	0.00430351
253.4	-0.00880961	0.0294645	0.0311858	0.0222219	0.00422314
253.6	-0.00872259	0.0291857	0.0309575	0.0223487	0.00429125
253.8	-0.00923939	0.0286965	0.0305664	0.0216541	0.00395584
254	-0.00912225	0.0284536	0.0309178	0.0220268	0.0043573
254.2	-0.00893956	0.0282541	0.0305344	0.0222427	0.00465115
254.4	-0.00881982	0.0283212	0.0312163	0.0225529	0.00475128
254.6	-0.00894415	0.0278874	0.030951	0.0219905	0.0042029
254.8	-0.00943146	0.0277177	0.0305385	0.0215826	0.00378113
255	-0.00962047	0.027942	0.0303632	0.0219644	0.00352934
255.2	-0.00981393	0.0277518	0.0303897	0.0215467	0.00318867
255.4	-0.00971831	0.028172	0.0306788	0.0215385	0.00311708
255.6	-0.0101622	0.0284108	0.0304552	0.0215422	0.0027386
255.8	-0.00981427	0.0287567	0.030672	0.0220499	0.00319421
256	-0.00983455	0.028937	0.0311069	0.0224687	0.00314007
256.2	-0.0100875	0.0287159	0.0310348	0.0221294	0.00282308
256.4	-0.0098938	0.0285981	0.0310415	0.0225851	0.00270071
256.6	-0.00980175	0.0282269	0.0315455	0.0231309	0.0027866
256.8	-0.010319	0.027958	0.0310766	0.0228853	0.00233065
257	-0.00979448	0.0282918	0.0316686	0.0231068	0.00278082
257.2	-0.00944454	0.0280791	0.0318824	0.0232823	0.00299055
257.4	-0.00971816	0.0279365	0.0319976	0.0233355	0.00339732
257.6	-0.00924274	0.0275699	0.0320504	0.0231458	0.00354641
257.8	-0.00935797	0.0270699	0.0322416	0.0226189	0.00356379
258	-0.0094016	0.0269163	0.0320383	0.0225889	0.00346037
258.2	-0.00935076	0.0269966	0.0315914	0.0224701	0.00345003
258.4	-0.00931167	0.0269471	0.0315219	0.0218785	0.00330292
258.6	-0.00915901	0.0271501	0.03129	0.021629	0.0034716
258.8	-0.00970797	0.0268263	0.0305566	0.0209521	0.00332452
259	-0.00982585	0.026837	0.0305584	0.0206882	0.00332013
259.2	-0.00977007	0.0269847	0.0304376	0.0201809	0.00342475
259.4	-0.00988855	0.0276887	0.0304073	0.0207292	0.00343216
259.6	-0.00954972	0.0280897	0.0306037	0.0212837	0.00400357
259.8	-0.00958712	0.0278761	0.0302293	0.0213317	0.00415723
260	-0.0097725	0.0279618	0.0302301	0.0216357	0.00388703
260.2	-0.00964633	0.0281761	0.030373	0.0215499	0.00406044
260.4	-0.00933549	0.0282412	0.030953	0.0223512	0.00425639
260.6	-0.00967853	0.0281214	0.0308109	0.0224761	0.0042739
260.8	-0.00965599	0.0282405	0.0306671	0.0223785	0.00414056
261	-0.00848281	0.028605	0.0313881	0.0228511	0.00494549
261.2	-0.00832437	0.029037	0.031588	0.0232499	0.00484598
261.4	-0.00830806	0.0293895	0.0320976	0.0232214	0.00530675
261.6	-0.00822947	0.0296197	0.0317057	0.0228962	0.00468464
261.8	-0.00874578	0.0296086	0.0314246	0.0225858	0.00410162
262	-0.00866673	0.0298724	0.0312548	0.0227436	0.00401404
262.2	-0.00797161	0.0306019	0.0312348	0.0227622	0.00412603
262.4	-0.00784182	0.0308536	0.0312719	0.0227006	0.00462666
262.6	-0.00835085	0.0309067	0.0311652	0.0223541	0.00450625
262.8	-0.00916169	0.0300663	0.0305306	0.0211552	0.00394599
263	-0.00904566	0.0301549	0.030925	0.0212204	0.00388688
263.2	-0.00917541	0.0298121	0.0308853	0.0211395	0.00368759
263.4	-0.00933307	0.0296903	0.030884	0.0212068	0.00355475
263.6	-0.00950384	0.0292452	0.0306397	0.0208303	0.00341962
263.8	-0.009987	0.0285578	0.0299137	0.0202729	0.00295234
264	-0.00998235	0.0290266	0.0299925	0.020691	0.00270883
264.2	-0.00984095	0.0294175	0.029957	0.020555	0.00304011
264.4	-0.01023	0.0287217	0.0298899	0.0202766	0.00288141
264.6	-0.0105513	0.0285887	0.029349	0.0199343	0.00282979
264.8	-0.010454	0.0283768	0.0293429	0.019874	0.00257376
265	-0.00995724	0.0288249	0.0297882	0.0205932	0.00283739
265.2	-0.010349	0.0286683	0.0297179	0.0208762	0.0023411
265.4	-0.0105323	0.0280469	0.0291438	0.0203419	0.00240735
265.6	-0.0109388	0.0280329	0.0288113	0.0202305	0.00171174
265.8	-0.0108657	0.0282847	0.0288582	0.0205265	0.00184836
266	-0.0105481	0.0285356	0.0290436	0.020782	0.00191786
266.2	-0.00986745	0.0290564	0.0293945	0.021131	0.00214346
266.4	-0.0100692	0.0291464	0.0296077	0.0213422	0.00241503
266.6	-0.0103454	0.0291127	0.0295789	0.0212512	0.00238219
266.8	-0.0100047	0.029482	0.029592	0.0210476	0.00249173
267	-0.00939395	0.0299798	0.0299057	0.0216169	0.00289698
267.2	-0.00898614	0.0298621	0.029712	0.0216988	0.00287779
267.4	-0.00872303	0.0301109	0.0296522	0.0220551	0.00295194
267.6	-0.00869639	0.0301165	0.0296769	0.0220241	0.00268427
267.8	-0.00859605	0.030371	0.0296947	0.0224421	0.00276307
268	-0.00834269	0.030914	0.0302208	0.0226326	0.0029475
268.2	-0.00838116	0.0309979	0.0302719	0.0224676	0.00337722
268.4	-0.00861398	0.030228	0.0305497	0.0223463	0.00301233
268.6	-0.00906572	0.0297101	0.0302231	0.0225244	0.00216027
268.8	-0.00864385	0.0296426	0.0305781	0.0231599	0.00185619
269	-0.00838696	0.0296955	0.0307175	0.0238347	0.00226253
269.2	-0.00850387	0.0289576	0.0307604	0.0239723	0.00209181
269.4	-0.00858905	0.0284966	0.0307785	0.0240826	0.00208896
269.6	-0.00888735	0.0284622	0.0313666	0.024222	0.00171875
269.8	-0.00878942	0.0285523	0.0317529	0.0247303	0.0018834
270	-0.00848248	0.0286555	0.0321746	0.0254951	0.00202891
270.2	-0.00840955	0.0289342	0.0324723	0.0254372	0.00228476
270.4	-0.00919421	0.0286862	0.0320095	0.024718	0.00206519
270.6	-0.00925044	0.0288145	0.0317233	0.0242723	0.00219907
270.8	-0.00922323	0.0291804	0.0316437	0.0239826	0.00229529
271	-0.00945379	0.0285863	0.0311775	0.0233506	0.00237269
271.2	-0.00914902	0.0287678	0.031089	0.0228837	0.00238571
271.4	-0.00945447	0.0288073	0.0310841	0.0223951	0.00232857
271.6	-0.00955438	0.0288844	0.0310882	0.021499	0.00251649
271.8	-0.00961491	0.0294483	0.0315568	0.0214844	0.00305111
272	-0.00925569	0.0297332	0.0319904	0.0209496	0.00362481
272.2	-0.00925914	0.0301064	0.0320142	0.02046	0.00368956
272.4	-0.00925725	0.029924	0.0322801	0.0199039	0.00329078
272.6	-0.00888188	0.0301203	0.0321755	0.0199838	0.00322683
272.8	-0.00878535	0.0305213	0.0323575	0.0199266	0.00359106
273	-0.00902623	0.0306512	0.0322018	0.0198392	0.00371158
273.2	-0.00889519	0.0307533	0.0326154	0.0203296	0.00394747
273.4	-0.00922721	0.0306148	0.0325722	0.0203733	0.00363265
273.6	-0.00935441	0.0309257	0.0326997	0.0207198	0.00356958
273.8	-0.00926195	0.0314732	0.0323152	0.0210368	0.00386501
274	-0.0089494	0.0314423	0.0326523	0.0213167	0.0040142
274.2	-0.00894181	0.031423	0.0328615	0.0212265	0.00396515
274.4	-0.00944685	0.031006	0.0321805	0.0212172	0.00383795
274.6	-0.00895032	0.0308147	0.0322991	0.0218465	0.00397489
274.8	-0.00895763	0.0305686	0.032332	0.0221639	0.0037122
275	-0.00927355	0.0296582	0.0318769	0.0218984	0.00335846
275.2	-0.00899032	0.0295984	0.0317029	0.0223711	0.00337976
275.4	-0.00921071	0.0292608	0.0316162	0.0222942	0.00313614
275.6	-0.00900069	0.0295048	0.0320365	0.0226186	0.00345701
275.8	-0.00873378	0.0300194	0.0327868	0.0233914	0.0038152
276	-0.00893442	0.0293843	0.032335	0.0230724	0.00366888
276.2	-0.00941768	0.0290642	0.0316879	0.0223784	0.00304882
276.4	-0.00940503	0.0288616	0.0314396	0.0223893	0.00284903
276.6	-0.00917347	0.0291231	0.0314063	0.0228995	0.00323251
276.8	-0.00975344	0.0291663	0.0314715	0.0226088	0.00319671
277	-0.00997427	0.0291429	0.0312652	0.0226493	0.0032335
277.2	-0.0100166	0.0289557	0.0315361	0.0225521	0.00343371
277.4	-0.0102544	0.0291659	0.0309849	0.0221855	0.00379885
277.6	-0.0104154	0.0295815	0.0307342	0.0218558	0.00399141
277.8	-0.00982056	0.0299099	0.0313119	0.0217539	0.00452493
278	-0.00920487	0.0303775	0.0323886	0.022381	0.00507794
278.2	-0.00892815	0.0305755	0.0320273	0.0225695	0.00534653
278.4	-0.00899011	0.0304044	0.0315873	0.0223946	0.00559773
278.6	-0.00874853	0.0299554	0.0316983	0.0222653	0.00521562
278.8	-0.00930234	0.0298128	0.0315578	0.0219794	0.00458458
279	-0.00924515	0.0297744	0.0311414	0.0223067	0.00457553
279.2	-0.00845672	0.0301977	0.0309995	0.0225504	0.00461039
279.4	-0.0087913	0.0302718	0.0310779	0.0221422	0.00432715
279.6	-0.00898969	0.0307592	0.0311367	0.0223249	0.00408343
279.8	-0.00926835	0.0304671	0.0309551	0.0221158	0.0036505
280	-0.00957502	0.0301812	0.0302533	0.0216339	0.00307882
280.2	-0.00956086	0.0302739	0.0303655	0.0216889	0.00252775
280.4	-0.009233	0.0305459	0.0309973	0.0221687	0.00296791
280.6	-0.00927498	0.0308064	0.0315237	0.0227613	0.00338547
280.8	-0.00988258	0.0303088	0.0316106	0.0222502	0.00321149
281	-0.0105847	0.03019	0.0316746	0.0223768	0.0033391
281.2	-0.0109108	0.0299755	0.0315906	0.022132	0.00332269
281.4	-0.0106661	0.0302168	0.0313445	0.0221917	0.00385396
281.6	-0.0107423	0.0297612	0.0312666	0.0223271	0.00360595
281.8	-0.0103291	0.0300862	0.0318845	0.0230164	0.00409473
282	-0.0101599	0.0302164	0.0318273	0.0236245	0.00434481
282.2	-0.00969321	0.0298321	0.0314185	0.0237739	0.0045833
282.4	-0.00914224	0.0300579	0.0319547	0.0244012	0.00525031
282.6	-0.00852466	0.0302585	0.0324439	0.0251755	0.00521645
282.8	-0.00851247	0.0304594	0.0326298	0.0257455	0.00535238
283	-0.00751948	0.0308894	0.0325556	0.0261671	0.00579979
283.2	-0.00709482	0.0312011	0.0327016	0.0261639	0.00610153
283.4	-0.00779028	0.0309867	0.0324148	0.0256152	0.00582031
283.6	-0.00793873	0.0318264	0.0328451	0.0251453	0.00561672
283.8	-0.00762601	0.0318638	0.0331202	0.0245339	0.00559749
284	-0.00765408	0.0321326	0.0331754	0.0241301	0.00561676
284.2	-0.00733626	0.0321205	0.033709	0.0238833	0.00570614
284.4	-0.00771624	0.0322172	0.0336006	0.0233828	0.00586463
284.6	-0.00809361	0.0322182	0.0335255	0.0232732	0.00565282
284.8	-0.00838286	0.0323751	0.0334416	0.022692	0.00527401
285	-0.00847333	0.0325755	0.0333053	0.0229272	0.00532955
285.2	-0.00864215	0.031877	0.0327494	0.0225126	0.0047416
285.4	-0.00885089	0.0314026	0.0318821	0.0221345	0.00419467
285.6	-0.00904673	0.0310504	0.031422	0.0221993	0.00413887
285.8	-0.00919642	0.0312567	0.0316728	0.0222997	0.00429729
286	-0.00880944	0.030971	0.0318668	0.0222058	0.00409511
286.2	-0.00874793	0.0307308	0.0313255	0.0220683	0.00368063
286.4	-0.00851515	0.0305548	0.0311964	0.0219498	0.00357673
286.6	-0.00855552	0.0301571	0.0310817	0.0217355	0.00309314
286.8	-0.00898727	0.0298612	0.030875	0.0213817	0.00295817
287	-0.00896863	0.0295465	0.0306386	0.0211454	0.00276967
287.2	-0.00922689	0.0294385	0.0307193	0.0209287	0.0026793
287.4	-0.00946351	0.0291743	0.0310186	0.0206075	0.00274003
287.6	-0.00967823	0.0294936	0.0311052	0.0201919	0.00261544
287.8	-0.00968622	0.0293142	0.0312048	0.0203182	0.00269082
288	-0.00970791	0.0294586	0.0314897	0.0209991	0.00309867
288.2	-0.00959193	0.0295721	0.0316205	0.021372	0.00325775
288.4	-0.00930681	0.0297713	0.0313684	0.0216136	0.00351894
288.6	-0.00914719	0.0302951	0.0314513	0.0221855	0.00363034
288.8	-0.0090806	0.0309618	0.0313845	0.0223955	0.0038734
289	-0.00956713	0.0312715	0.0310665	0.0224976	0.00414455
289.2	-0.0097796	0.0310243	0.0308451	0.0224183	0.0038933
289.4	-0.0103745	0.0313418	0.0306454	0.0224413	0.00369555
289.6	-0.00996204	0.0317735	0.0312596	0.0225484	0.00430601
289.8	-0.0102682	0.0318106	0.0314833	0.0224678	0.00416021
290	-0.0103722	0.0315212	0.0312929	0.0219072	0.00365747
290.2	-0.0112025	0.0312668	0.0304352	0.0213043	0.00277194
290.4	-0.01115	0.0314574	0.0303993	0.0210975	0.00273944
290.6	-0.0115277	0.0310287	0.0305718	0.0211398	0.00263783
290.8	-0.0115178	0.0311379	0.0308506	0.0207531	0.00288303
291	-0.0113702	0.0310209	0.0306685	0.020636	0.0025761
291.2	-0.0114768	0.0308391	0.0304408	0.0206109	0.00222318
291.4	-0.0117277	0.0304746	0.0307309	0.0210984	0.00219963
291.6	-0.01157	0.0300387	0.030181	0.0210579	0.00186983
291.8	-0.0114817	0.0296302	0.0303582	0.0213695	0.00189192
292	-0.0109672	0.0298951	0.0304176	0.0217579	0.0021148
292.2	-0.0105098	0.0294158	0.0306192	0.0211953	0.00195987
292.4	-0.00946109	0.0298309	0.0313413	0.0214487	0.00273533
292.6	-0.00952539	0.0304007	0.0318409	0.021929	0.00273996
292.8	-0.00916698	0.0304937	0.0320382	0.0221434	0.00338697
293	-0.00916341	0.0301519	0.0320919	0.0219684	0.00369136
293.2	-0.00903631	0.0301431	0.0325503	0.0220801	0.00378152
293.4	-0.00946124	0.0302999	0.0327219	0.0222273	0.00418126
293.6	-0.00915713	0.0307733	0.0331192	0.0223731	0.00479176
293.8	-0.00935041	0.0312142	0.0329289	0.0227094	0.00457686
294	-0.00944809	0.0314831	0.0331664	0.0232388	0.00458697
294.2	-0.00959876	0.0321604	0.03333	0.0237969	0.00468606
294.4	-0.00929933	0.0329211	0.0335507	0.0238685	0.00526673
294.6	-0.00948509	0.0327794	0.0335979	0.0240257	0.00559901
294.8	-0.00976139	0.0333669	0.033698	0.0239974	0.00605835
295	-0.00958734	0.033603	0.0329414	0.0245016	0.00574833
295.2	-0.00941915	0.0333681	0.0328475	0.0251118	0.00566824
295.4	-0.00908715	0.0329434	0.0331938	0.0253844	0.00552958
295.6	-0.00884897	0.0326932	0.0328698	0.0251497	0.00509379
295.8	-0.00860759	0.0325701	0.0331404	0.0251761	0.00482423
296	-0.00855231	0.0327474	0.0331868	0.0250744	0.004641
296.2	-0.00819061	0.0324661	0.0338683	0.0247631	0.00481823
296.4	-0.00806866	0.032761	0.0341035	0.0248889	0.0052632
296.6	-0.00844928	0.0323838	0.0337485	0.0245623	0.00489034
296.8	-0.00853351	0.0319184	0.0335197	0.0238213	0.00496814
297	-0.00932728	0.031428	0.0334288	0.0230569	0.00471721
297.2	-0.0096484	0.0316742	0.0333891	0.0228542	0.00445744
297.4	-0.00972525	0.0312958	0.0333374	0.0230066	0.00445637
297.6	-0.00953397	0.0315134	0.0331763	0.0230994	0.00407741
297.8	-0.00971757	0.0313223	0.0326558	0.0232785	0.00347881
298	-0.009965	0.0310621	0.0330155	0.0236559	0.00359498
298.2	-0.0101835	0.0310764	0.0323442	0.0233224	0.00369783
298.4	-0.0101453	0.0312862	0.0322397	0.0231908	0.00378927
298.6	-0.0103821	0.0312075	0.0319309	0.0235531	0.003651
298.8	-0.0105092	0.0312292	0.031902	0.0234373	0.00349907
299	-0.00983396	0.0313959	0.0321995	0.0236771	0.00337953
299.2	-0.00903635	0.030935	0.0327249	0.0241097	0.00352516
299.4	-0.00895363	0.0310826	0.0329146	0.0242838	0.00293139
299.6	-0.00893131	0.0311601	0.0330718	0.0242599	0.00287438
299.8	-0.00839001	0.0312484	0.0330958	0.0246861	0.00314736
300	-0.00864858	0.0315244	0.0329887	0.0247296	0.00301883
300.2	-0.00834226	0.0322105	0.0337426	0.0249901	0.00374556
300.4	-0.00838881	0.0325962	0.0337186	0.0247792	0.00384025
300.6	-0.00858995	0.0324553	0.0337787	0.0246921	0.00371061
300.8	-0.00865295	0.0326059	0.0338933	0.0254033	0.00395003
301	-0.00857271	0.0325114	0.0340729	0.0259474	0.00431624
301.2	-0.00816451	0.0324685	0.0338545	0.0262428	0.00447056
301.4	-0.0076076	0.0325571	0.0342306	0.0265642	0.00492007
301.6	-0.00752862	0.0325787	0.0339633	0.0264295	0.00508781
301.8	-0.00761445	0.0325034	0.0338677	0.0264667	0.00515581
302	-0.00734269	0.0326975	0.0341908	0.0267585	0.00562727
302.2	-0.00737165	0.0329067	0.0335568	0.0269844	0.0057641
302.4	-0.00717804	0.0333865	0.0339815	0.0270489	0.00593105
302.6	-0.00732714	0.0334358	0.0338264	0.0269956	0.00566985
302.8	-0.00720637	0.0334789	0.0343567	0.0266954	0.00597121
303	-0.00670613	0.0335582	0.034635	0.0272114	0.0060297
303.2	-0.0066906	0.0334317	0.0345599	0.0269446	0.00591756
303.4	-0.00692602	0.0335553	0.0349382	0.0271535	0.00575568
303.6	-0.00678744	0.0335473	0.0351369	0.0269971	0.00603114
303.8	-0.00670065	0.0336386	0.0352432	0.0274616	0.00618893
304	-0.00712275	0.0333683	0.0353202	0.0270719	0.00571073
304.2	-0.00731459	0.0331887	0.0349307	0.0268096	0.00587712
304.4	-0.00769976	0.0325864	0.0347457	0.0263693	0.0054521
304.6	-0.00811923	0.0323479	0.03452	0.0261749	0.00530482
304.8	-0.00818075	0.0319553	0.0344727	0.0261355	0.00524186
305	-0.00855694	0.0318826	0.0338275	0.0252423	0.00503297
305.2	-0.00902026	0.0316073	0.0336609	0.0243649	0.00492438
305.4	-0.00885261	0.03219	0.0340594	0.0244256	0.00531977
305.6	-0.00915831	0.0317744	0.0335612	0.0240971	0.00513216
305.8	-0.00910304	0.0313983	0.0332535	0.0236954	0.00503662
306	-0.00943872	0.0312812	0.0325857	0.0234756	0.00508572
306.2	-0.00923734	0.0316158	0.0321957	0.023689	0.00542755
306.4	-0.0093593	0.0316579	0.03212	0.0232585	0.00577212
306.6	-0.00950348	0.0316556	0.0318418	0.0237244	0.00564035
306.8	-0.0093272	0.0320507	0.0321925	0.0237374	0.0059909
307	-0.00992377	0.0323351	0.032093	0.0237918	0.00541345
307.2	-0.00965846	0.0329014	0.0328585	0.0240388	0.0059361
307.4	-0.00979577	0.0330199	0.0330623	0.02449	0.00630628
307.6	-0.00926355	0.0335301	0.0332886	0.0246712	0.00699433
307.8	-0.00945431	0.0335284	0.0332978	0.0249549	0.00694308
308	-0.00927689	0.0334942	0.0330333	0.0247229	0.00678286
308.2	-0.00905678	0.033929	0.0330433	0.0248136	0.00711413
308.4	-0.00879496	0.0341342	0.0336162	0.0249173	0.00717171
308.6	-0.00911379	0.0342236	0.0334012	0.0249005	0.0069169
308.8	-0.00920166	0.034162	0.0336391	0.024719	0.00663321
309	-0.00978003	0.0343265	0.0334141	0.024827	0.00634935
309.2	-0.00941424	0.0342244	0.0337137	0.0250352	0.00660033
309.4	-0.00970058	0.0339435	0.0338675	0.0253599	0.00630143
309.6	-0.00903765	0.0332629	0.033893	0.0250394	0.00615983
309.8	-0.00886026	0.0327577	0.0337336	0.024889	0.00610493
310	-0.0088935	0.0325397	0.0337986	0.0248914	0.00589138
310.2	-0.00855919	0.0325871	0.0340572	0.0251284	0.00589998
310.4	-0.00894221	0.0322404	0.0341067	0.0247482	0.00541344
310.6	-0.00906957	0.0322553	0.0338203	0.0249424	0.00469917
310.8	-0.00911309	0.0325102	0.0338084	0.0247161	0.00425659
311	-0.00902047	0.0325277	0.033831	0.0247717	0.00379946
311.2	-0.00849181	0.0326813	0.0340682	0.0247045	0.00387116
311.4	-0.00864491	0.0327536	0.0338588	0.0246565	0.00391885
311.6	-0.0078236	0.0330713	0.0338829	0.0248037	0.00419274
311.8	-0.00811616	0.0330843	0.0340431	0.0250465	0.00382914
312	-0.00745316	0.0332576	0.0342424	0.0254278	0.00421322
312.2	-0.00701329	0.0337698	0.0349913	0.0258867	0.0046418
312.4	-0.00713427	0.0336105	0.0348082	0.0258532	0.00470599
312.6	-0.00730017	0.0334458	0.0347876	0.0258868	0.00460112
312.8	-0.00731447	0.0335942	0.0349241	0.025842	0.00467599
313	-0.0077899	0.0334114	0.0345672	0.0260807	0.0050095
313.2	-0.00782367	0.033328	0.0347769	0.0262182	0.00561159
313.4	-0.00869081	0.0329179	0.0349669	0.0260772	0.00525516
313.6	-0.00820149	0.0327855	0.034924	0.0261049	0.00550879
313.8	-0.00853183	0.0321768	0.0347664	0.0261134	0.00550711
314	-0.00894752	0.0318714	0.0348964	0.0259406	0.00517029
314.2	-0.00886022	0.0321135	0.0347195	0.0262631	0.0050431
314.4	-0.0090313	0.0318484	0.0346452	0.0256988	0.00469314
314.6	-0.00931916	0.0318929	0.0343234	0.0254865	0.00449281
314.8	-0.00876338	0.0320067	0.0348164	0.0255385	0.00464941
315	-0.00866902	0.0321426	0.0350104	0.025272	0.00451367
315.2	-0.00867012	0.0323766	0.0352757	0.0251212	0.00468018
315.4	-0.00852538	0.0327067	0.0359338	0.0259483	0.00509306
315.6	-0.00880387	0.0320895	0.0355713	0.0252914	0.00465381
315.8	-0.009011	0.0320009	0.0358715	0.0255634	0.00468881
316	-0.00877052	0.0320666	0.0356761	0.02567	0.00458527
316.2	-0.0087903	0.0322694	0.0353117	0.0252632	0.00416807
316.4	-0.00897156	0.0325466	0.0347618	0.025247	0.00407855
316.6	-0.00887923	0.0326807	0.0345596	0.0252969	0.00398804
316.8	-0.00923249	0.0327153	0.034064	0.0249136	0.00395188
317	-0.0101008	0.0325725	0.0331426	0.024563	0.00402562
317.2	-0.0101656	0.0329383	0.0332765	0.0246897	0.00409716
317.4	-0.0102869	0.0330146	0.0325671	0.0244111	0.0035655
317.6	-0.0100769	0.033132	0.0322294	0.0245324	0.0036156
317.8	-0.00982895	0.0333016	0.0320265	0.0247437	0.00367702
318	-0.00961601	0.0338103	0.031966	0.0252318	0.00379945
318.2	-0.00898061	0.0342455	0.0325171	0.0254537	0.00428691
318.4	-0.00880826	0.034508	0.0325147	0.0255074	0.00458207
318.6	-0.0087596	0.0348155	0.0328969	0.0257309	0.00501053
318.8	-0.00809187	0.0352071	0.0334481	0.0259648	0.00559982
319	-0.00817445	0.0353171	0.033884	0.025934	0.00574372
319.2	-0.00811128	0.0346084	0.0340476	0.0260069	0.00563318
319.4	-0.00835566	0.0340408	0.0343622	0.0260968	0.00556513
319.6	-0.00879073	0.0329317	0.0338268	0.02481	0.00487051
319.8	-0.00923165	0.0330131	0.0339622	0.025006	0.00445279
320	-0.00972936	0.0323572	0.0335617	0.0246918	0.00361259
320.2	-0.00996286	0.0321148	0.0336156	0.0244401	0.00314329
320.4	-0.00975817	0.0321515	0.0337365	0.0245068	0.00322596
320.6	-0.0100811	0.0315519	0.0333611	0.0238028	0.00278788
320.8	-0.0103441	0.0308671	0.0326664	0.0228596	0.0024994
321	-0.0102473	0.0310839	0.0325069	0.0230995	0.00271384
321.2	-0.00960833	0.031707	0.033141	0.0232467	0.00297012
321.4	-0.0093316	0.0317052	0.0328936	0.0232526	0.0030969
321.6	-0.00935723	0.031939	0.0328903	0.0232163	0.00318668
321.8	-0.00909627	0.0320662	0.0330011	0.0237467	0.00371695
322	-0.00870879	0.0321758	0.0332294	0.0242827	0.00400628
322.2	-0.00869754	0.0322781	0.033412	0.0243656	0.00404877
322.4	-0.00785564	0.0329502	0.0336043	0.0251285	0.00452084
322.6	-0.00750222	0.0329567	0.0339071	0.0252083	0.00486457
322.8	-0.0070177	0.0332811	0.0342077	0.0253185	0.00483995
323	-0.0066269	0.0332076	0.0344945	0.0255942	0.00486883
323.2	-0.00709465	0.0327642	0.0343382	0.0255955	0.00467079
323.4	-0.00706291	0.0330514	0.0346094	0.0256251	0.00507429
323.6	-0.00769438	0.0331384	0.0345314	0.0251812	0.00467432
323.8	-0.0083833	0.0333809	0.0345603	0.0253943	0.00430778
324	-0.00822495	0.0334222	0.0345843	0.0254147	0.00444953
324.2	-0.0083463	0.0334536	0.0347854	0.0254104	0.0042863
324.4	-0.00864698	0.0335363	0.0344268	0.0252409	0.00418796
324.6	-0.00850851	0.0336539	0.0349689	0.0252591	0.00446885
324.8	-0.00828902	0.0335389	0.0350172	0.0249907	0.00464611
325	-0.00806698	0.034095	0.0352111	0.0254487	0.00507432
325.2	-0.00840575	0.0336181	0.034904	0.0248984	0.00480263
325.4	-0.00848189	0.033278	0.034797	0.0246869	0.00482302
325.6	-0.00896705	0.03323	0.034914	0.0242036	0.00497704
325.8	-0.00870304	0.0333458	0.0353613	0.0245537	0.00518271
326	-0.0085161	0.0333183	0.0354935	0.0247987	0.00506196
326.2	-0.00833091	0.0333712	0.0354751	0.024717	0.00503065
326.4	-0.00812605	0.0332934	0.035688	0.0249391	0.00548077
326.6	-0.00808538	0.0331069	0.0354176	0.0250241	0.00538662
326.8	-0.00803212	0.0332424	0.0351557	0.0249766	0.00513973
327	-0.00798747	0.0331836	0.034939	0.02531	0.00542535
327.2	-0.00877232	0.0330478	0.0349683	0.0250593	0.00539169
327.4	-0.00910333	0.0331427	0.0345202	0.0250003	0.0053087
327.6	-0.00942787	0.0333422	0.0344988	0.0250854	0.00503519
327.8	-0.0097154	0.0331634	0.0342321	0.0247571	0.00467651
328	-0.00973121	0.0330005	0.0340028	0.0249617	0.00476267
328.2	-0.0098553	0.0332011	0.0342742	0.0249296	0.004688
328.4	-0.00982353	0.0333397	0.0343654	0.0250507	0.00481587
328.6	-0.00891476	0.0337565	0.0350142	0.0252609	0.00543018
328.8	-0.00903752	0.0332251	0.034532	0.0248113	0.00517159
329	-0.00923215	0.0329417	0.0340356	0.0246526	0.00529442
329.2	-0.00952195	0.0322495	0.0336627	0.0239989	0.00497588
329.4	-0.00920204	0.0327964	0.0342959	0.0243184	0.0050874
329.6	-0.00941559	0.0328122	0.0343051	0.0238709	0.00498346
329.8	-0.00872489	0.0330383	0.0343461	0.0241712	0.00489391
330	-0.00872946	0.0330729	0.0343972	0.0240716	0.00489789
330.2	-0.00905453	0.0327411	0.0338585	0.0232324	0.00426541
330.4	-0.00916858	0.0328764	0.0337491	0.023403	0.00399787
330.6	-0.00930172	0.033153	0.0334128	0.0236279	0.0037684
330.8	-0.0100592	0.0329896	0.0326964	0.0234115	0.00295804
331	-0.0107203	0.0326491	0.0326374	0.0235502	0.00250452
331.2	-0.0113037	0.0325098	0.0327089	0.0233467	0.0024891
331.4	-0.0112412	0.0324588	0.0323333	0.0234815	0.0023871
331.6	-0.0110042	0.0327053	0.0323153	0.0232822	0.00225058
331.8	-0.0107435	0.0327401	0.0322458	0.0235761	0.00260218
332	-0.010298	0.0329239	0.0328385	0.024497	0.00330789
332.2	-0.00951243	0.0336137	0.0336995	0.0248327	0.00399022
332.4	-0.00977637	0.0333397	0.0335989	0.0251384	0.00416464
332.6	-0.0095857	0.0330582	0.0331801	0.0248493	0.00418864
332.8	-0.00914047	0.0330399	0.0338144	0.0255976	0.00490625
333	-0.00867457	0.0334241	0.0340097	0.026138	0.00560272
333.2	-0.00830593	0.0335824	0.0340908	0.0264228	0.00549336
333.4	-0.00759976	0.0337883	0.0342638	0.0267924	0.00541828
333.6	-0.00714598	0.0338033	0.0343997	0.0264294	0.0054625
333.8	-0.00694467	0.0339718	0.0345113	0.0268445	0.00563971
334	-0.00733588	0.0338235	0.0347222	0.0264931	0.00546561
334.2	-0.0073648	0.0341669	0.0349175	0.0263771	0.00538535
334.4	-0.00776154	0.0343852	0.0348907	0.026413	0.00489059
334.6	-0.00871871	0.0339359	0.0345053	0.026032	0.00467247
334.8	-0.00901403	0.0335794	0.0343604	0.0256975	0.00411704
335	-0.00939932	0.0336093	0.0343795	0.0258069	0.0041298
335.2	-0.00961088	0.0336885	0.0346316	0.0255297	0.00435436
335.4	-0.00982383	0.0337009	0.0343732	0.0254882	0.00438525
335.6	-0.00998882	0.0342907	0.0347639	0.0256837	0.00458311
335.8	-0.00969372	0.0341245	0.035191	0.0262239	0.00467044
336	-0.00954746	0.0341225	0.0356504	0.0261918	0.00486839
336.2	-0.0100068	0.0338442	0.0353156	0.0255781	0.00445318
336.4	-0.0103003	0.033288	0.034599	0.0253258	0.00443408
336.6	-0.00994516	0.0329959	0.0344173	0.0251744	0.00441235
336.8	-0.00975577	0.0331531	0.0345003	0.0257763	0.00490575
337	-0.0100166	0.0327476	0.0337123	0.0253659	0.00427747
337.2	-0.0104771	0.0319142	0.0326295	0.0247832	0.00343179
337.4	-0.0104047	0.0318701	0.0325351	0.0247726	0.00342015
337.6	-0.0103623	0.0320614	0.0328033	0.0248736	0.00365204
337.8	-0.0101392	0.0319755	0.0328109	0.0250241	0.00380862
338	-0.00998556	0.0323117	0.033075	0.0249421	0.00422775
338.2	-0.00972003	0.0329983	0.0335342	0.0248644	0.00458217
338.4	-0.00966263	0.0330323	0.0330096	0.0246029	0.00426926
338.6	-0.00967572	0.0329378	0.0326395	0.0244702	0.00448843
338.8	-0.00945915	0.0335652	0.0326076	0.0245272	0.00465114
339	-0.00901844	0.0345154	0.032947	0.0250048	0.00525552
339.2	-0.00880641	0.0346486	0.0336103	0.0249243	0.00556812
339.4	-0.00806118	0.0349569	0.0341299	0.0252337	0.00605766
339.6	-0.00703174	0.0357088	0.0350885	0.0254095	0.00669665
339.8	-0.00605683	0.0358873	0.0356386	0.0257583	0.00724697
340	-0.00613983	0.0357728	0.0358847	0.025488	0.00739053
340.2	-0.00622622	0.0356992	0.0356959	0.0251488	0.00702358
340.4	-0.00598143	0.0353982	0.035849	0.0250895	0.00747996
340.6	-0.00568558	0.0350526	0.0360834	0.025366	0.00732163
340.8	-0.00570968	0.0350839	0.035686	0.0255841	0.00733837
341	-0.00563989	0.0345578	0.0357574	0.0256466	0.00704944
341.2	-0.00575807	0.0344892	0.035603	0.0257334	0.00661348
341.4	-0.00608739	0.0348819	0.0359993	0.0260892	0.00662953
341.6	-0.00683682	0.0347436	0.0356209	0.0257949	0.00628427
341.8	-0.00681896	0.034694	0.0354721	0.025837	0.00607212
342	-0.00792246	0.0342933	0.0352995	0.0257726	0.0058697
342.2	-0.00837333	0.0338995	0.0344988	0.0252263	0.00505948
342.4	-0.00852807	0.0340589	0.0338266	0.02546	0.00475001
342.6	-0.0091493	0.0340643	0.0329326	0.0253431	0.00440936
342.8	-0.00927142	0.0343304	0.0330219	0.0253181	0.00455327
343	-0.00920816	0.0342831	0.0331269	0.0251476	0.00428493
343.2	-0.009427	0.0340181	0.0333643	0.0252408	0.00391679
343.4	-0.00902394	0.0341813	0.0333473	0.025329	0.00420433
343.6	-0.00902842	0.0341858	0.0329969	0.0251563	0.0043012
343.8	-0.0085007	0.0343769	0.0333801	0.0261114	0.00458282
344	-0.00882818	0.0343115	0.0331058	0.0257132	0.00411093
344.2	-0.00788395	0.034766	0.0334139	0.0258632	0.00455352
344.4	-0.00719304	0.0351277	0.0338722	0.0265674	0.00500669
344.6	-0.00660258	0.0352684	0.033928	0.0271742	0.00510148
344.8	-0.00652706	0.0354961	0.0339971	0.0273057	0.00520472
345	-0.00611213	0.0353737	0.0341615	0.0274865	0.00550022
345.2	-0.00617586	0.0357173	0.0343575	0.027422	0.00526028
345.4	-0.00658835	0.0354735	0.0341866	0.027126	0.00521139
345.6	-0.0073714	0.0347952	0.0342306	0.0267037	0.00523004
345.8	-0.00695396	0.0342654	0.0343505	0.02687	0.00542813
346	-0.00774314	0.0339188	0.0343725	0.0266259	0.00523771
346.2	-0.00756961	0.0339771	0.0341996	0.0265009	0.00522023
346.4	-0.00750518	0.0344314	0.0347531	0.026913	0.00579031
346.6	-0.00863565	0.0337883	0.0341315	0.0260133	0.00533383
346.8	-0.00920383	0.0332733	0.0344134	0.0251681	0.0050374
347	-0.00942979	0.0340436	0.0348996	0.025064	0.0052121
347.2	-0.00915237	0.0341077	0.0349419	0.0247742	0.00534892
347.4	-0.00922433	0.0343321	0.0350198	0.0245433	0.00560133
347.6	-0.00958467	0.0342198	0.0346915	0.0240473	0.00501024
347.8	-0.00961415	0.0344953	0.0352229	0.0244536	0.00535322
348	-0.00990964	0.0346942	0.0350036	0.024028	0.00528991
348.2	-0.00977613	0.0347485	0.0348412	0.024308	0.00521863
348.4	-0.00983583	0.0353193	0.0344039	0.0247907	0.00509501
348.6	-0.00991241	0.034764	0.034214	0.0249785	0.00524926
348.8	-0.00938946	0.0350564	0.0340603	0.0256853	0.00561077
349	-0.008484	0.0352114	0.034033	0.026073	0.00627485
349.2	-0.00843744	0.0351775	0.0341242	0.0262726	0.00593511
349.4	-0.00814594	0.0351373	0.0343395	0.0267298	0.00612803
349.6	-0.00793018	0.0352416	0.0344739	0.0272429	0.00681575
349.8	-0.00686389	0.0360167	0.0350251	0.0278468	0.0073791
350	-0.0068012	0.0363292	0.0352362	0.0278257	0.00733808
350.2	-0.00615819	0.0366988	0.0356078	0.0280709	0.00782614
350.4	-0.00613785	0.0369415	0.0360393	0.0279001	0.00760412
350.6	-0.00648224	0.0371063	0.036035	0.0278787	0.00729158
350.8	-0.00568096	0.0380219	0.0368371	0.0282	0.00768529
351	-0.00492427	0.039178	0.0375961	0.0287164	0.00801448
351.2	-0.00452246	0.0384015	0.0372726	0.0278196	0.0074847
351.4	-0.00500365	0.0386101	0.0378598	0.0277249	0.00732252
351.6	-0.00545421	0.0379844	0.0374509	0.0270576	0.00670276
351.8	-0.00556574	0.0375047	0.0375802	0.0271779	0.00682102
352	-0.00577351	0.036903	0.036888	0.0268253	0.00628858
352.2	-0.00583383	0.0364563	0.0363421	0.0268516	0.00623673
352.4	-0.0057342	0.0360671	0.0359114	0.027086	0.0063275
352.6	-0.00654664	0.0350027	0.0352938	0.0267837	0.00584412
352.8	-0.00672111	0.0348296	0.0349542	0.0270422	0.00582609
353	-0.0068321	0.0345095	0.0347628	0.0267851	0.00591959
353.2	-0.00754077	0.0341147	0.0344702	0.0270816	0.00585319
353.4	-0.00717904	0.0345251	0.0350108	0.0275995	0.00663853
353.6	-0.00784969	0.0347152	0.0349881	0.027656	0.00701493
353.8	-0.00857407	0.0345765	0.0350826	0.0274527	0.0067096
354	-0.00921582	0.0342515	0.0347993	0.0273656	0.00644705
354.2	-0.00915397	0.0347619	0.0352131	0.0276111	0.00647066
354.4	-0.00972434	0.0344048	0.0349469	0.0273757	0.00565273
354.6	-0.0096389	0.0345496	0.0350915	0.0276659	0.00542105
354.8	-0.00944409	0.0344739	0.0350592	0.0277133	0.00505671
355	-0.00947912	0.0346705	0.0347364	0.0275773	0.00462188
355.2	-0.00946986	0.0344535	0.0347692	0.0269676	0.00454196
355.4	-0.00918569	0.0350094	0.0353604	0.0273574	0.00466329
355.6	-0.00870798	0.0348785	0.0349057	0.0272643	0.00462604
355.8	-0.00873293	0.0347585	0.0344423	0.0270978	0.00426639
356	-0.00876344	0.03479	0.0340283	0.0265795	0.00433738
356.2	-0.00832197	0.0351722	0.0342066	0.0269925	0.00490089
356.4	-0.00775892	0.0353202	0.0341705	0.026978	0.0053553
356.6	-0.00795765	0.0351432	0.0338101	0.0265664	0.00525163
356.8	-0.00752458	0.0353278	0.0340454	0.0270548	0.00588975
357	-0.007377	0.0354376	0.0341824	0.026968	0.00623554
357.2	-0.00754909	0.0352569	0.0339593	0.0269534	0.00616168
357.4	-0.00754687	0.036057	0.0344971	0.0269035	0.00656197
357.6	-0.0084031	0.0360106	0.0340321	0.0263793	0.00598223
357.8	-0.00850893	0.0356264	0.03329	0.0260496	0.00545151
358	-0.00834365	0.0356414	0.0331216	0.0259415	0.00520431
358.2	-0.00827812	0.0355847	0.0329376	0.0255945	0.00467526
358.4	-0.00867434	0.0349982	0.0325366	0.025029	0.00397686
358.6	-0.00840728	0.0352184	0.0330305	0.0250845	0.00383318
358.8	-0.00845454	0.0353681	0.0331812	0.0251234	0.00366695
359	-0.00838316	0.0358145	0.0336804	0.0250847	0.00383618
359.2	-0.00814121	0.0359946	0.0344982	0.0251405	0.00411374
359.4	-0.0079968	0.0361964	0.0349422	0.0253818	0.00437318
359.6	-0.00810061	0.0363016	0.0351253	0.0251807	0.00453917
359.8	-0.00831312	0.0364781	0.0356183	0.0251833	0.00469902
360.01	0.0076417	0.0450239	0.0444569	0.0392132	0.0135823
360.21	0.00800786	0.0450796	0.0444947	0.0386802	0.01332
360.41	0.00859164	0.0450098	0.0443933	0.0385348	0.0132041
360.61	0.00948217	0.0452992	0.0443624	0.0383953	0.0133072
360.81	0.00930395	0.0449231	0.0441234	0.0378981	0.012917
361.01	0.00967484	0.0448369	0.0442331	0.0375907	0.0129482
361.21	0.0101966	0.044789	0.0441217	0.0377254	0.0131199
361.41	0.0106392	0.0449658	0.0441343	0.037574	0.0131962
361.61	0.0108815	0.0451138	0.0441313	0.0372753	0.0133043
361.81	0.0116839	0.0454254	0.044419	0.0373803	0.0136597
362.01	0.0114935	0.0455948	0.044586	0.0374628	0.0139309
362.21	0.0114417	0.045799	0.0442592	0.0372099	0.0141126
362.41	0.0110398	0.045802	0.044233	0.0367914	0.0145842
362.61	0.0108467	0.0454332	0.0439763	0.0367116	0.0144132
362.81	0.0109182	0.0452885	0.0440658	0.0367879	0.0142333
363.01	0.0111544	0.0456092	0.0437457	0.0366979	0.0145493
363.21	0.0117786	0.0455227	0.0437575	0.0365566	0.0147156
363.41	0.0120003	0.0451201	0.0439037	0.0363496	0.0147109
363.61	0.0116217	0.0449888	0.0443135	0.0360707	0.0148943
363.81	0.0117188	0.0444973	0.0441494	0.0363643	0.014937
364.01	0.0118931	0.0440124	0.0441714	0.0359436	0.0150008
364.21	0.0116476	0.0438945	0.0437606	0.0360343	0.0146233
364.41	0.0116748	0.0439167	0.0431052	0.036283	0.0141805
364.61	0.0113871	0.0437942	0.0431493	0.0363332	0.0139567
364.81	0.010577	0.0431892	0.0432052	0.036464	0.0135036
365.01	0.0109248	0.0438014	0.0433952	0.0367732	0.0138215
365.21	0.0107371	0.0439028	0.0433718	0.0373981	0.0136727
365.41	0.0107327	0.0443535	0.0434992	0.0373248	0.0135449
365.61	0.0104227	0.044474	0.0433772	0.0377699	0.0133873
365.81	0.0109009	0.044989	0.0439454	0.0386606	0.0136166
366.01	0.0105456	0.0448436	0.0437027	0.0387921	0.0130637
366.21	0.0106967	0.0448279	0.0431162	0.038919	0.0129863
366.41	0.0101087	0.0444404	0.0434256	0.0387188	0.0130262
366.61	0.00997064	0.0443309	0.0430118	0.0386671	0.0127587
366.81	0.00989177	0.0440133	0.042577	0.0384733	0.0127768
367.01	0.0104651	0.0441789	0.0427284	0.0384507	0.0132619
367.21	0.0115795	0.0440931	0.0432539	0.0384778	0.0137791
367.41	0.0117874	0.043775	0.0436223	0.0387837	0.013995
367.61	0.0117362	0.0437635	0.043971	0.0387064	0.0143758
367.81	0.0116019	0.0439315	0.0439935	0.0387372	0.0144853
368.01	0.0118378	0.0440851	0.0442024	0.0383254	0.0145572
368.21	0.0115654	0.0443725	0.0437531	0.0382355	0.0142028
368.41	0.0110436	0.0443081	0.0436117	0.0378039	0.0139267
368.61	0.0109092	0.0440952	0.0438948	0.0377124	0.0140868
368.81	0.0111447	0.0444722	0.0443664	0.0380549	0.0144902
369.01	0.0109756	0.0450204	0.0443659	0.0378783	0.0146254
369.21	0.0106428	0.0446161	0.0444096	0.0378593	0.0143173
369.41	0.0107724	0.0444906	0.0444893	0.0373883	0.0142967
369.61	0.0107352	0.0443116	0.0445242	0.0377295	0.0141532
369.81	0.0110147	0.0443002	0.0448776	0.0376965	0.0141867
370.01	0.0104262	0.043686	0.0444565	0.0371163	0.0136706
370.21	0.0101909	0.0431856	0.044099	0.0369545	0.013528
370.41	0.00915596	0.0426618	0.0440084	0.0365031	0.0132205
370.61	0.00881553	0.0426159	0.0436765	0.0363829	0.013084
370.81	0.00948205	0.0427076	0.0447136	0.0369843	0.0138735
371.01	0.0107463	0.0436739	0.0458076	0.0378344	0.0145888
371.21	0.0113967	0.044419	0.0463289	0.0380808	0.014935
371.41	0.0107007	0.0441212	0.04629	0.0381717	0.0147985
371.61	0.0106024	0.0443881	0.0464324	0.0385897	0.0149871
371.81	0.0107331	0.0448677	0.0464088	0.0387634	0.0149731
372.01	0.0108402	0.0453023	0.0460561	0.0387842	0.0150517
372.21	0.0104453	0.0452008	0.0456494	0.0389586	0.0146929
372.41	0.0108547	0.045418	0.0457773	0.0393559	0.0149511
372.61	0.011323	0.0453723	0.0452376	0.0392771	0.0146909
372.81	0.0117406	0.0460902	0.0456339	0.0400535	0.0152787
373.01	0.0116187	0.0457918	0.0449528	0.0393772	0.0149547
373.21	0.012005	0.0456006	0.0447663	0.0392447	0.0150879
373.41	0.0123854	0.0452293	0.0448465	0.0391232	0.0151401
373.61	0.0127241	0.045365	0.0449962	0.0388582	0.0151035
373.81	0.0129647	0.0452631	0.0450921	0.0386941	0.0151339
374.01	0.0129944	0.0452122	0.0449929	0.0386973	0.0145827
374.21	0.0132925	0.0454126	0.045096	0.0390291	0.014548
374.41	0.0129908	0.0454295	0.045105	0.0387766	0.0143819
374.61	0.0133857	0.0458438	0.045791	0.0391662	0.0148501
374.81	0.0141139	0.0463415	0.0468802	0.0399718	0.0157411
375.01	0.0140151	0.0469327	0.0469907	0.0403467	0.01609
375.21	0.0139288	0.0471801	0.0469378	0.0402856	0.0161246
375.41	0.0136624	0.0470748	0.0466186	0.0404952	0.0158968
375.61	0.0142541	0.0472857	0.0467852	0.0409239	0.0161042
375.81	0.0140048	0.0472483	0.046633	0.0407772	0.0161655
376.01	0.013626	0.047172	0.0463329	0.0407144	0.0163577
376.21	0.0135299	0.0471625	0.0463146	0.040497	0.0161838
376.41	0.0133625	0.0469321	0.0456592	0.0402307	0.0162149
376.61	0.0126257	0.046628	0.0449068	0.0397248	0.0159029
376.81	0.0126599	0.0470334	0.0448667	0.039754	0.0165522
377.01	0.0125774	0.0465687	0.0443597	0.0391318	0.0163129
377.21	0.012532	0.0464173	0.0443007	0.038936	0.0163317
377.41	0.0126523	0.0463825	0.0441812	0.0388127	0.015852
377.61	0.0128788	0.0467711	0.0442387	0.0382624	0.015413
377.81	0.013156	0.0469856	0.0445955	0.038889	0.0152854
378.01	0.0130989	0.0470746	0.0443911	0.038774	0.0147076
378.21	0.0132712	0.047252	0.0445361	0.0388687	0.014957
378.41	0.0133878	0.0470171	0.0447423	0.0387125	0.0148051
378.61	0.0130088	0.046851	0.0448455	0.0387128	0.0149898
378.81	0.0126951	0.0462337	0.0449606	0.038167	0.0148485
379.01	0.0125846	0.0461102	0.0453634	0.0382525	0.0147091
379.21	0.0132735	0.0465131	0.0461623	0.0388409	0.0151941
379.41	0.0136857	0.0464633	0.0463056	0.0389028	0.0153602
379.61	0.013532	0.0461944	0.0466613	0.0389657	0.0158469
379.81	0.0135476	0.0462143	0.047115	0.0398992	0.0161054
380.01	0.0138813	0.046271	0.0475159	0.0400269	0.0165597
380.21	0.0135504	0.0465376	0.047497	0.0396713	0.0167195
380.41	0.013205	0.0462605	0.0467589	0.0396181	0.0168001
380.61	0.0128726	0.0460921	0.0467595	0.0395699	0.0169
380.81	0.0128193	0.0460672	0.0465184	0.0395651	0.0171438
381.01	0.0130595	0.0464531	0.0466261	0.0401376	0.0173167
381.21	0.0125038	0.046077	0.0462653	0.0396697	0.0167688
381.41	0.0125015	0.0463663	0.0463167	0.0403519	0.0164931
381.61	0.0123661	0.0463696	0.0463497	0.0407479	0.0165216
381.81	0.0125606	0.0465986	0.0467341	0.0414615	0.0165528
382.01	0.0119916	0.0460353	0.046025	0.0413811	0.0162117
382.21	0.0116595	0.045666	0.0455999	0.0413687	0.015896
382.41	0.0112572	0.0451523	0.0452673	0.0412428	0.0156644
382.61	0.0105509	0.0441009	0.0447393	0.0406943	0.0147662
382.81	0.0104366	0.0437009	0.0446818	0.0402774	0.0141979
383.01	0.0105602	0.044213	0.0451254	0.0407121	0.0145111
383.21	0.0109876	0.0448738	0.0450549	0.0411306	0.0149799
383.41	0.011063	0.0452437	0.0449094	0.0409616	0.0151226
383.61	0.0115655	0.045579	0.045871	0.0409595	0.015642
383.81	0.0124854	0.0465891	0.0465141	0.0415206	0.0156684
384.01	0.0128183	0.0472064	0.0471313	0.0412639	0.0162325
384.21	0.0133321	0.0476738	0.0475119	0.0414783	0.0161782
384.41	0.01372	0.0481473	0.0478669	0.0421235	0.0165011
384.61	0.0137779	0.0479468	0.0482467	0.0420299	0.0166549
384.81	0.0142977	0.0481972	0.0486142	0.0425127	0.0169518
385.01	0.0152754	0.0482824	0.0489117	0.0427764	0.0174154
385.21	0.0151791	0.047821	0.0487699	0.0424094	0.0170383
385.41	0.0155566	0.0480995	0.0488186	0.0432317	0.0174252
385.61	0.0154047	0.0477959	0.048483	0.0435642	0.0176438
385.81	0.0152277	0.0476117	0.0480978	0.0438309	0.0175977
386.01	0.0146228	0.0468133	0.0471025	0.0438476	0.0173084
386.21	0.0149266	0.0466102	0.0468695	0.0438257	0.0174306
386.41	0.0151039	0.046643	0.0468638	0.0441273	0.0178522
386.61	0.0144545	0.0459144	0.046281	0.0437892	0.0170748
386.81	0.0142603	0.0459614	0.0458428	0.0435731	0.0171921
387.01	0.0137397	0.0458482	0.045656	0.043621	0.0171785
387.21	0.0138752	0.0461684	0.045693	0.0434913	0.0175391
387.41	0.0137882	0.046442	0.045835	0.0432724	0.0175281
387.61	0.0138706	0.0463261	0.0460942	0.0426681	0.0173516
387.81	0.0138602	0.0468026	0.0462465	0.0431816	0.0169512
388.01	0.0142278	0.0474498	0.0468565	0.0436194	0.0175538
388.21	0.0139706	0.0473786	0.0468201	0.0433651	0.017042
388.41	0.0133259	0.0471554	0.0468503	0.0427071	0.0166318
388.61	0.0131346	0.0467532	0.0466486	0.0414365	0.0161222
388.81	0.0132014	0.0466719	0.0466445	0.0408077	0.0158164
389.01	0.0134799	0.0468863	0.0469559	0.0406436	0.0157767
389.21	0.0132738	0.046664	0.0465822	0.0400439	0.0153252
389.41	0.0132486	0.0470173	0.046755	0.0401654	0.0156981
389.61	0.0130103	0.0466263	0.0463977	0.0397296	0.0151968
389.81	0.0127836	0.046785	0.0462983	0.0395788	0.0151595
390.01	0.0129933	0.0470302	0.0466278	0.0398407	0.0151543
390.21	0.0136438	0.0476208	0.047315	0.0401473	0.015788
390.41	0.0133671	0.0478131	0.0476678	0.0405191	0.0161066
390.61	0.0126561	0.0472753	0.0474318	0.0407225	0.0157988
390.81	0.0128923	0.0474542	0.0479309	0.0411035	0.0160857
391.01	0.0131046	0.0475643	0.0480656	0.0412043	0.0162232
391.21	0.0133396	0.047573	0.0481556	0.041252	0.016881
391.41	0.0136631	0.0475046	0.0481961	0.0419161	0.0170591
391.61	0.0140205	0.0475185	0.0482524	0.0420222	0.0174112
391.81	0.0145819	0.0482714	0.0487268	0.0425593	0.0175256
392.01	0.01501	0.0489364	0.0493097	0.042922	0.0184977
392.21	0.0143935	0.0486831	0.0489062	0.0422604	0.0181014
392.41	0.015086	0.048899	0.0492711	0.0424019	0.0181722
392.61	0.0151458	0.0494201	0.0496762	0.0421052	0.0182174
392.81	0.0151006	0.0495121	0.0497531	0.0418731	0.0181375
393.01	0.0152118	0.049328	0.0500034	0.0421761	0.0178816
393.21	0.0149045	0.0487064	0.0495475	0.0417686	0.0172651
393.41	0.0152462	0.0489525	0.0499012	0.042003	0.0174697
393.61	0.0149845	0.0484255	0.0495134	0.0416517	0.0167346
393.81	0.0148583	0.0487664	0.0496027	0.0418148	0.0169281
394.01	0.0151539	0.0489497	0.0497424	0.0423222	0.0170643
394.21	0.0147939	0.0484688	0.0495231	0.0421598	0.0170283
394.41	0.0142384	0.0484341	0.0491156	0.0422239	0.0169812
394.61	0.0139907	0.0480347	0.0483568	0.0423059	0.0164259
394.81	0.0139846	0.0476884	0.0482053	0.0420202	0.0160105
395.01	0.0141596	0.0480339	0.0479909	0.0418524	0.0163471
395.21	0.0139462	0.0476467	0.0477244	0.0420897	0.0163792
395.41	0.0144077	0.0476981	0.0479088	0.0427771	0.016527
395.61	0.014636	0.0482903	0.0479239	0.0426813	0.0165105
395.81	0.0148307	0.0489726	0.0481006	0.0425314	0.0165263
396.01	0.0153948	0.0497433	0.0484548	0.0428752	0.0172016
396.21	0.0155555	0.0502461	0.0482533	0.0427737	0.0171126
396.41	0.0161877	0.0504649	0.0488937	0.0425754	0.0170946
396.61	0.0160621	0.0509471	0.0493143	0.0420271	0.0171418
396.81	0.0160861	0.0505486	0.0493767	0.041623	0.0172349
397.01	0.0162489	0.0502106	0.049672	0.0415795	0.0168582
397.21	0.0165466	0.0497806	0.0498471	0.0416951	0.0166994
397.41	0.0169085	0.0496099	0.0497977	0.0418475	0.0170817
397.61	0.01694	0.0491997	0.0494468	0.0416964	0.0169927
397.81	0.0169957	0.0492348	0.0494113	0.0419676	0.0171346
398.01	0.0165811	0.0486781	0.0492946	0.041989	0.0169996
398.21	0.0161756	0.0482651	0.0486284	0.0418659	0.0168628
398.41	0.0163456	0.0484986	0.0483702	0.0421776	0.0168539
398.61	0.0155724	0.0476547	0.0480061	0.0420143	0.0162903
398.81	0.0153274	0.0475149	0.0483279	0.0421391	0.0163559
399.01	0.0152621	0.0475695	0.0481914	0.0423914	0.0165217
399.21	0.0145901	0.0471128	0.0476846	0.0426456	0.0162623
399.41	0.0145609	0.0470835	0.047464	0.0426078	0.016267
399.61	0.0147966	0.0479438	0.0478765	0.0428944	0.016282
[truncated: 1,601 more rows]

## Sheet: right
time	20 uM	10 uM	5 uM	2.5 uM	1.25 uM
0	0.0572199	0.0409142	0.026165	0.0216327	0.0145845
0.2	0.0582815	0.0415571	0.0270471	0.0223334	0.0153892
0.4	0.0592118	0.041703	0.0273935	0.0221262	0.0158139
0.6	0.0602359	0.0422355	0.0281242	0.0224931	0.0166965
0.8	0.0606557	0.0423507	0.028566	0.0225308	0.0171261
1	0.0610684	0.0423616	0.0289327	0.0226145	0.0174954
1.2	0.0612389	0.0423911	0.0297534	0.022636	0.0176351
1.4	0.0601963	0.0419892	0.0297046	0.022449	0.017556
1.6	0.0589581	0.0417091	0.0297885	0.0224996	0.0173673
1.8	0.0572182	0.0413842	0.0295721	0.022455	0.0173115
2	0.0551722	0.0403775	0.0292189	0.0221899	0.0173332
2.2	0.0527158	0.0396764	0.0282006	0.0222256	0.0169153
2.4	0.0508211	0.0385105	0.0273406	0.0219197	0.0165345
2.6	0.0494778	0.037845	0.0266799	0.0218742	0.0168347
2.8	0.0482238	0.0369299	0.0262437	0.0215598	0.016363
3	0.0471356	0.0359035	0.0253589	0.0211807	0.0157414
3.2	0.046191	0.0350137	0.0246755	0.02038	0.0153554
3.4	0.0457804	0.0344042	0.0241757	0.0204929	0.015188
3.6	0.0450647	0.0336415	0.0236499	0.0204307	0.0147254
3.8	0.0445391	0.0330762	0.0230495	0.0208523	0.0150197
4	0.0443243	0.0332804	0.023613	0.0216533	0.0159494
4.2	0.0443379	0.0331969	0.0239422	0.0218855	0.0158158
4.4	0.0444737	0.0327842	0.0240428	0.0214075	0.0159763
4.6	0.0446871	0.0326457	0.0246606	0.021511	0.0163982
4.8	0.0445744	0.0320682	0.0247266	0.0214528	0.0162233
5	0.0445898	0.0320464	0.0248525	0.0214628	0.0162539
5.2	0.0439778	0.0316267	0.0251551	0.0209962	0.0161752
5.4	0.0434609	0.0311057	0.0248048	0.0213529	0.0162678
5.6	0.0435885	0.0314308	0.0252526	0.0217966	0.0164714
5.8	0.0430265	0.0313354	0.0250079	0.0219203	0.0165868
6	0.0425869	0.0306715	0.0242826	0.0211909	0.0166819
6.2	0.0422428	0.0303775	0.0233744	0.0212807	0.0163485
6.4	0.0417939	0.029705	0.023265	0.0209192	0.0162259
6.6	0.041746	0.0294216	0.0230148	0.0209639	0.0163375
6.8	0.041669	0.0288412	0.0225423	0.0206278	0.0158683
7	0.0417265	0.0287003	0.0220982	0.0202653	0.0156599
7.2	0.0416402	0.0290156	0.0218523	0.0200821	0.0159225
7.4	0.0408134	0.0288523	0.0215606	0.0196934	0.0160092
7.6	0.0405305	0.0281727	0.0212753	0.0192946	0.0156056
7.8	0.0406231	0.0284589	0.0216315	0.0196879	0.0159851
8	0.0400518	0.0288176	0.0216683	0.0196252	0.0156738
8.2	0.0393031	0.0286997	0.0212867	0.0193405	0.0151977
8.4	0.0390468	0.0283345	0.0211301	0.0189326	0.0155823
8.6	0.0382885	0.0281084	0.0208482	0.0186473	0.0153647
8.8	0.0379962	0.0281669	0.020355	0.0189547	0.0154609
9	0.0374253	0.0282938	0.0200059	0.0189064	0.0156738
9.2	0.0370368	0.0279007	0.0198717	0.0183505	0.0152834
9.4	0.0370436	0.0278888	0.0198373	0.018785	0.0154456
9.6	0.0367405	0.0280256	0.0195716	0.018482	0.0148687
9.8	0.0358866	0.0275817	0.0191572	0.0180801	0.0149294
10	0.0357304	0.0271124	0.0185687	0.0177418	0.0153203
10.2	0.0359944	0.026646	0.0185039	0.0181168	0.015138
10.4	0.0362824	0.0265764	0.0188949	0.0182694	0.0154857
10.6	0.0362383	0.0265262	0.0187886	0.0181404	0.015505
10.8	0.0364044	0.0259962	0.0185975	0.0185987	0.01537
11	0.0367456	0.0261473	0.0187478	0.0185629	0.015401
11.2	0.0368206	0.0261692	0.0189137	0.0183396	0.0154507
11.4	0.0368425	0.0258682	0.0188468	0.018502	0.0152881
11.6	0.0371865	0.025617	0.0187706	0.0185794	0.0148006
11.8	0.0373233	0.0259433	0.0191585	0.0190867	0.0151736
12	0.0366211	0.0259699	0.0188452	0.0190345	0.0148399
12.2	0.0362527	0.0256758	0.0185504	0.0189852	0.0148063
12.4	0.0361663	0.0254909	0.0182404	0.0192449	0.0147661
12.6	0.0359523	0.0257185	0.0181485	0.0193873	0.0145386
12.8	0.0356015	0.0256378	0.0175681	0.0192856	0.0140695
13	0.0350154	0.0257131	0.0172323	0.0188013	0.0136289
13.2	0.0345998	0.0253311	0.0170178	0.0178976	0.0130725
13.4	0.0342968	0.0253166	0.0169277	0.0180306	0.0133948
13.6	0.0338106	0.0252479	0.016468	0.0174509	0.0130041
13.8	0.0337525	0.0254617	0.0167539	0.017142	0.0137396
14	0.0342813	0.025503	0.0168056	0.0173368	0.0140623
14.2	0.0351966	0.0254175	0.0173831	0.0175415	0.0139151
14.4	0.0357032	0.0255687	0.0176926	0.0178511	0.0143859
14.6	0.0358482	0.0256964	0.0176188	0.0183555	0.0146431
14.8	0.0363489	0.0258235	0.0177459	0.0191423	0.0144679
15	0.0366293	0.0260136	0.0180976	0.0190675	0.0142667
15.2	0.0369779	0.0262033	0.0182486	0.0192532	0.0144514
15.4	0.036956	0.0258996	0.0181467	0.0196291	0.0144493
15.6	0.0366252	0.0251198	0.0181435	0.0191153	0.0139738
15.8	0.0368072	0.0248764	0.0186594	0.0189623	0.0143152
16	0.0368108	0.0245634	0.018333	0.0187266	0.0142726
16.2	0.0366321	0.023913	0.0177848	0.0187305	0.0140257
16.4	0.0364551	0.0237771	0.0174653	0.0183586	0.0139409
16.6	0.0356695	0.0230712	0.0171118	0.0175906	0.0133411
16.8	0.0351078	0.0227847	0.0167212	0.0169724	0.0130078
17	0.0353444	0.0228725	0.0171063	0.0165689	0.0130215
17.2	0.0349907	0.0224288	0.0173183	0.0160708	0.0132159
17.4	0.035112	0.0229439	0.0175234	0.0162193	0.0135563
17.6	0.0352431	0.0227191	0.0172967	0.0156165	0.0134322
17.8	0.0354623	0.02283	0.0177222	0.0154622	0.0134446
18	0.0362299	0.022664	0.0179525	0.0152407	0.0133257
18.2	0.0365189	0.0225977	0.0178514	0.0151006	0.0128755
18.4	0.0364011	0.0226982	0.0175575	0.0151497	0.013061
18.6	0.0359569	0.0229047	0.0170684	0.0152514	0.0131346
18.8	0.0357111	0.0233014	0.0170754	0.0156395	0.0129357
19	0.035681	0.0232942	0.0168636	0.0159179	0.0132173
19.2	0.0359973	0.023419	0.0164341	0.0162333	0.0135706
19.4	0.0359483	0.0233415	0.0161302	0.0164778	0.0137047
19.6	0.0357049	0.0228385	0.0153523	0.0157816	0.0133848
19.8	0.0357446	0.0229684	0.0148773	0.0158984	0.0134072
20	0.0357078	0.0229087	0.0142678	0.0161154	0.0131925
20.2	0.0347966	0.0229461	0.0136717	0.0160944	0.0129631
20.4	0.0343617	0.0228868	0.0135126	0.0160368	0.0130564
20.6	0.03385	0.0229044	0.0133791	0.0158287	0.0126448
20.8	0.034196	0.022832	0.0135143	0.0162994	0.0127188
21	0.0342927	0.0227005	0.0139083	0.0164942	0.0127328
21.2	0.0341005	0.0226087	0.0141852	0.0165973	0.0130585
21.4	0.0346981	0.0226878	0.0141744	0.0170485	0.013227
21.6	0.0343795	0.0220593	0.0140516	0.0167171	0.0128202
21.8	0.0341393	0.0222497	0.0143441	0.0166479	0.0126427
22	0.0346431	0.0232732	0.01512	0.0165862	0.0131169
22.2	0.0341351	0.0233023	0.0149759	0.0165606	0.0133712
22.4	0.0336991	0.022894	0.014855	0.01632	0.0131268
22.6	0.0336809	0.0232701	0.014789	0.0163193	0.0132196
22.8	0.0344962	0.0240682	0.0154294	0.0167493	0.0139937
23	0.0346596	0.0236569	0.0151159	0.0167785	0.0143201
23.2	0.0347111	0.0233233	0.0147473	0.0165056	0.0141641
23.4	0.0346982	0.0231757	0.0142281	0.0161832	0.0138636
23.6	0.0348837	0.0227731	0.01428	0.0158429	0.0138674
23.8	0.0345167	0.022497	0.0143412	0.0154626	0.0136003
24	0.0347617	0.0222959	0.0143332	0.0153288	0.0136017
24.2	0.033969	0.0219482	0.0137683	0.0145725	0.0134493
24.4	0.0341256	0.0215641	0.0135178	0.0138154	0.0132465
24.6	0.0338201	0.0210679	0.0130129	0.0130884	0.0123075
24.8	0.0341615	0.0203918	0.0129934	0.01326	0.0118271
25	0.0340418	0.0201163	0.013246	0.0129615	0.011572
25.2	0.0343715	0.0205777	0.0138606	0.0130712	0.0119605
25.4	0.0339838	0.0202362	0.0137309	0.0130271	0.0119593
25.6	0.0334448	0.0204307	0.0139564	0.0129486	0.0119385
25.8	0.0335388	0.0210905	0.0143613	0.012966	0.0124149
26	0.0335168	0.0216995	0.0148511	0.0127481	0.0128222
26.2	0.0334255	0.0215426	0.0149726	0.0127676	0.0129637
26.4	0.0335199	0.021863	0.0150247	0.0128711	0.0128315
26.6	0.0339533	0.0227711	0.0153319	0.0133368	0.0136932
26.8	0.0344898	0.0230856	0.0155156	0.013712	0.0143132
27	0.0345719	0.0227453	0.015252	0.0141388	0.0142275
27.2	0.0349671	0.0233539	0.0153436	0.0145899	0.0142699
27.4	0.0353073	0.0234854	0.0158152	0.0150773	0.0144184
27.6	0.0357374	0.023393	0.0161733	0.015322	0.0149456
27.8	0.0350477	0.0232286	0.0157718	0.0149427	0.0143359
28	0.0355576	0.0231205	0.0153118	0.0152423	0.0143664
28.2	0.0352949	0.0230989	0.0148245	0.0150787	0.0137667
28.4	0.0354343	0.0232607	0.0144299	0.0148869	0.0133933
28.6	0.0352712	0.0225348	0.014293	0.015019	0.0122719
28.8	0.0354608	0.0222777	0.0144321	0.0148167	0.0113963
29	0.0354443	0.0224115	0.01464	0.0149741	0.0114748
29.2	0.0352101	0.0222518	0.0143025	0.0147083	0.0114613
29.4	0.0341373	0.0211729	0.0136354	0.0141645	0.0109767
29.6	0.0341822	0.0212049	0.0135588	0.0142178	0.0109322
29.8	0.0342127	0.0212088	0.0137349	0.0141511	0.0110833
30	0.0338433	0.0208641	0.013587	0.0136648	0.0110843
30.2	0.0340927	0.0213555	0.0136573	0.0134715	0.011354
30.4	0.0343926	0.0214619	0.0134752	0.013557	0.0117351
30.6	0.0341552	0.0213858	0.0133816	0.013372	0.0119612
30.8	0.0343839	0.0215651	0.0133962	0.0138245	0.0120898
31	0.0348409	0.0218158	0.013307	0.0140625	0.0123302
31.2	0.0349527	0.0219672	0.0131675	0.0140727	0.0127031
31.4	0.0351283	0.0220871	0.0133133	0.0139783	0.0128541
31.6	0.0357106	0.022329	0.0133081	0.0140026	0.0132659
31.8	0.0360365	0.0223713	0.0134982	0.0140415	0.0131398
32	0.0369014	0.022656	0.013739	0.0145264	0.0134296
32.2	0.0370262	0.0230197	0.014022	0.0146681	0.0135092
32.4	0.0371845	0.0230722	0.0145896	0.0143737	0.0136112
32.6	0.0372929	0.0227292	0.0151873	0.0146192	0.0132085
32.8	0.0370546	0.0227322	0.0147517	0.0142922	0.0126689
33	0.0373119	0.023062	0.0150195	0.0151038	0.0132708
33.2	0.0361396	0.0224036	0.0146956	0.014831	0.0123946
33.4	0.0355138	0.022101	0.0147866	0.0150209	0.0122398
33.6	0.0358608	0.022341	0.0149495	0.015652	0.0124045
33.8	0.0353468	0.0215829	0.0144193	0.015534	0.0118784
34	0.0348542	0.0211591	0.0137542	0.0153571	0.0120582
34.2	0.0349456	0.0213881	0.0135537	0.0153788	0.0120683
34.4	0.0344599	0.0207425	0.0131798	0.0152889	0.012014
34.6	0.0334637	0.020517	0.0127422	0.0147557	0.0119642
34.8	0.0335094	0.0207519	0.0124958	0.0149708	0.0121855
35	0.033436	0.0206633	0.0123045	0.0147355	0.012334
35.2	0.0330137	0.0206227	0.011949	0.0145361	0.0122915
35.4	0.0338143	0.0211985	0.0121191	0.0147188	0.0125705
35.6	0.0342252	0.0212232	0.0124153	0.01437	0.0127162
35.8	0.0343327	0.0216183	0.0127063	0.0138825	0.0126333
36	0.0344996	0.0218913	0.012707	0.0138856	0.0129014
36.2	0.0345106	0.0221761	0.0131878	0.0135847	0.0131133
36.4	0.0344386	0.0222747	0.0134488	0.0133808	0.0130917
36.6	0.0346434	0.0225339	0.0135823	0.0136482	0.0130406
36.8	0.0348393	0.0225096	0.0134891	0.0137254	0.0130209
37	0.0352513	0.0231324	0.0143856	0.0143293	0.0134735
37.2	0.0345663	0.0226271	0.013872	0.0139117	0.0127918
37.4	0.0351041	0.0225389	0.0138877	0.0144223	0.0131012
37.6	0.0358302	0.0222993	0.0138643	0.0148784	0.0132336
37.8	0.0356898	0.0217068	0.0135786	0.0150107	0.0130174
38	0.0359268	0.0217791	0.0134655	0.0153938	0.0139188
38.2	0.0360872	0.0219317	0.0134172	0.0151773	0.0137869
38.4	0.0361928	0.0217738	0.013709	0.015396	0.0139624
38.6	0.0362927	0.0219288	0.0138986	0.0157944	0.0139359
38.8	0.0366576	0.0223614	0.0142838	0.0162685	0.0141613
39	0.0362837	0.0218547	0.0140576	0.0159524	0.0136901
39.2	0.0362194	0.0216807	0.0139915	0.0160401	0.0131749
39.4	0.0367278	0.021956	0.0143794	0.016205	0.0131255
39.6	0.0360464	0.021301	0.0138837	0.0156088	0.0126912
39.8	0.0360045	0.0216715	0.0138272	0.0158418	0.0127456
40	0.0357796	0.0216335	0.0132973	0.0162071	0.0125441
40.2	0.0353299	0.0215745	0.0132184	0.0161038	0.0121148
40.4	0.0354444	0.021771	0.0131274	0.0163276	0.012086
40.6	0.0355117	0.021856	0.0132555	0.0161999	0.0119662
40.8	0.0356175	0.0220435	0.0129789	0.0159167	0.0120189
41	0.0350129	0.021889	0.0126079	0.0154407	0.0119799
41.2	0.0343106	0.0210925	0.0114985	0.0144212	0.0114131
41.4	0.0348872	0.0212083	0.0117756	0.0147022	0.0116925
41.6	0.0351176	0.0209013	0.0117735	0.0145862	0.0121563
41.8	0.0350556	0.0211481	0.0119087	0.0146514	0.0124255
42	0.0351648	0.0213249	0.0116151	0.0143396	0.0126069
42.2	0.035385	0.0218697	0.0120408	0.014267	0.0129457
42.4	0.0359088	0.0219372	0.0128986	0.0146693	0.0135656
42.6	0.0362591	0.0221434	0.0133018	0.0144332	0.0136275
42.8	0.0362837	0.0222207	0.0135937	0.0142934	0.0140107
43	0.0363564	0.0217905	0.0136874	0.0140124	0.0137579
43.2	0.0364431	0.0218144	0.0140457	0.014125	0.0134891
43.4	0.0368963	0.0223054	0.0143988	0.0143858	0.0136201
43.6	0.0367431	0.0222645	0.0141577	0.014334	0.0136563
43.8	0.036677	0.022765	0.0140232	0.0143988	0.0133266
44	0.0366621	0.0228931	0.0137703	0.0142525	0.0129174
44.2	0.0369526	0.0228714	0.0142536	0.0140853	0.0128598
44.4	0.0369382	0.022987	0.0141674	0.0140301	0.0127408
44.6	0.0368704	0.0230917	0.0144718	0.0138254	0.0126433
44.8	0.0366205	0.0231423	0.0141408	0.0139666	0.0122771
45	0.0361446	0.022696	0.0139935	0.0137565	0.012313
45.2	0.0365285	0.02251	0.0137488	0.0135954	0.0119572
45.4	0.037049	0.022375	0.014072	0.0139763	0.0122399
45.6	0.0360806	0.0218283	0.0138867	0.0135996	0.0117155
45.8	0.0354391	0.0216424	0.0139285	0.0135278	0.0112816
46	0.0352273	0.0213779	0.0140357	0.0135688	0.0113729
46.2	0.035659	0.0215878	0.014764	0.0143936	0.0125255
46.4	0.0359765	0.0214689	0.015194	0.0149308	0.0130903
46.6	0.0360313	0.0214956	0.0153698	0.0150938	0.0129677
46.8	0.0356147	0.020918	0.0149274	0.0151539	0.0127131
47	0.0355993	0.0207021	0.014898	0.0148654	0.0125826
47.2	0.0351973	0.0204495	0.0149118	0.0147583	0.0123762
47.4	0.0349557	0.0203824	0.0145582	0.0146821	0.0122662
47.6	0.0346692	0.0199554	0.0138135	0.0146214	0.0118685
47.8	0.0345985	0.019894	0.0135362	0.014714	0.0117057
48	0.0350507	0.0200338	0.0135975	0.0147414	0.0120888
48.2	0.035128	0.0200252	0.0137249	0.0149999	0.0118175
48.4	0.0346586	0.0196976	0.0131384	0.0147579	0.0113224
48.6	0.0350337	0.0202089	0.013365	0.0145293	0.0112071
48.8	0.0355856	0.0205496	0.0130342	0.0146095	0.0113514
49	0.0363771	0.0209481	0.0132852	0.0141942	0.0116801
49.2	0.0365195	0.0210006	0.0129158	0.013785	0.0112728
49.4	0.0360851	0.0213429	0.0127348	0.0129098	0.0109436
49.6	0.0364425	0.0216704	0.0130672	0.0130527	0.0110841
49.8	0.0373935	0.0221392	0.0138114	0.0131796	0.0120779
50	0.038298	0.0230164	0.0143814	0.0137681	0.0129801
50.2	0.0390925	0.0236849	0.0147282	0.0142553	0.0137125
50.4	0.0393212	0.02392	0.0150729	0.0145147	0.0139228
50.6	0.0392237	0.023823	0.0150302	0.0146049	0.0137266
50.8	0.0386865	0.0234201	0.0148523	0.014548	0.0138299
51	0.0385176	0.0231572	0.0150443	0.014509	0.0139037
51.2	0.0379483	0.0229977	0.0148094	0.0148159	0.0138443
51.4	0.038282	0.0229055	0.0145211	0.0153837	0.0137843
51.6	0.0380751	0.0228699	0.0145305	0.0160835	0.013749
51.8	0.0373262	0.0226315	0.0144718	0.0158919	0.0132022
52	0.0369208	0.0220188	0.0139165	0.0156117	0.0128749
52.2	0.0365721	0.0217454	0.0139592	0.0155875	0.0126607
52.4	0.0359267	0.0211953	0.0132824	0.0149541	0.0120834
52.6	0.0359848	0.0217722	0.0134839	0.0150078	0.0120965
52.8	0.0359571	0.0218383	0.0132382	0.015011	0.0120286
53	0.0357464	0.0220587	0.0132702	0.0147764	0.0118843
53.2	0.0353861	0.0217068	0.0125595	0.0142072	0.0114442
53.4	0.0358227	0.0219116	0.0129155	0.0140553	0.0116091
53.6	0.0367662	0.0218768	0.0137197	0.0141222	0.0121685
53.8	0.0368065	0.0219677	0.0136368	0.0138835	0.0127243
54	0.0373007	0.0222338	0.0137423	0.0141279	0.0129122
54.2	0.0375162	0.0221962	0.0139805	0.0139965	0.0130715
54.4	0.0378916	0.0223431	0.0143672	0.0143354	0.0135911
54.6	0.0380357	0.0224079	0.0144306	0.0140949	0.0137205
54.8	0.0386611	0.0229299	0.0149822	0.0144341	0.0140827
55	0.0388016	0.0229487	0.0150147	0.0143065	0.0140625
55.2	0.0387663	0.0234638	0.0150271	0.0148567	0.0143863
55.4	0.0390542	0.0237058	0.0151172	0.0155239	0.0146379
55.6	0.0381646	0.0236032	0.0147318	0.0151519	0.0141985
55.8	0.037844	0.023028	0.0143446	0.0148637	0.0136561
56	0.0381142	0.0231018	0.0144532	0.0156472	0.0143535
56.2	0.0381371	0.0235979	0.014463	0.0158429	0.0144198
56.4	0.0375302	0.0238013	0.0139327	0.0158198	0.0139267
56.6	0.0373812	0.0240384	0.0139907	0.016085	0.0138039
56.8	0.0375632	0.0241225	0.0135957	0.0158732	0.0135763
57	0.0379415	0.0243088	0.0137792	0.0163964	0.0136787
57.2	0.0378672	0.0237367	0.0131399	0.0161098	0.0132011
57.4	0.0384453	0.0240669	0.0134641	0.0163008	0.0132822
57.6	0.0386719	0.0239752	0.0133597	0.0159318	0.0129411
57.8	0.0392392	0.0242073	0.0134845	0.0164315	0.0133393
58	0.0397871	0.024398	0.0140918	0.0164815	0.0132039
58.2	0.0396388	0.0245507	0.0141555	0.0165124	0.0132362
58.4	0.0397976	0.0244682	0.0141877	0.0168304	0.0132311
58.6	0.0396418	0.0243491	0.0144839	0.0165307	0.013072
58.8	0.0393984	0.0243239	0.0145256	0.0168847	0.0130279
59	0.0383888	0.0240471	0.0143591	0.0163298	0.0131318
59.2	0.038069	0.0243951	0.0144033	0.0165472	0.0134433
59.4	0.0378284	0.0238203	0.0140739	0.0163514	0.0131058
59.6	0.0376358	0.0235847	0.0140313	0.01605	0.0127673
59.8	0.0376348	0.0231587	0.0138609	0.0160597	0.0128192
60	0.0374873	0.0233867	0.0138588	0.0158608	0.0132839
60.2	0.0370253	0.0236014	0.0136066	0.0152609	0.0134254
60.4	0.0367716	0.0237398	0.0137125	0.0150024	0.0134463
60.6	0.0373847	0.0239507	0.0139404	0.0152799	0.0138869
60.8	0.0377902	0.0243799	0.0143073	0.0149921	0.0137966
61	0.0378608	0.0243507	0.0145194	0.0154383	0.0139302
61.2	0.0378424	0.0244946	0.0145522	0.0151572	0.0139208
61.4	0.0383813	0.0250166	0.0151325	0.0153972	0.0139643
61.6	0.0381659	0.0247209	0.0155498	0.0155101	0.01374
61.8	0.0381013	0.0242713	0.0156688	0.0158094	0.0134429
62	0.0376727	0.0242165	0.0153941	0.0152833	0.0132372
62.2	0.0375016	0.0239039	0.0151296	0.0151174	0.0132885
62.4	0.0375088	0.0237014	0.0152726	0.015234	0.0132479
62.6	0.0374014	0.0242796	0.0155645	0.0154675	0.0132581
62.8	0.0372279	0.0241514	0.0150221	0.0153781	0.0128916
63	0.0372799	0.0243342	0.0150761	0.0153077	0.013311
63.2	0.0374601	0.0240361	0.0150654	0.0156649	0.0129761
63.4	0.0372169	0.0236429	0.0147526	0.0157139	0.0124688
63.6	0.0372467	0.023935	0.0147652	0.0158278	0.0120534
63.8	0.0373081	0.0235784	0.0140555	0.0154898	0.011906
64	0.0369468	0.0232173	0.0134538	0.0151698	0.0120005
64.2	0.0366177	0.023176	0.0132794	0.0156037	0.0119368
64.4	0.0366288	0.0229927	0.0130509	0.0156439	0.0116361
64.6	0.0370719	0.0228659	0.0128767	0.015858	0.0117421
64.8	0.0370369	0.0230845	0.0129984	0.0157747	0.0117309
65	0.0369986	0.0226596	0.0125613	0.0158628	0.0117809
65.2	0.0370437	0.0226926	0.0124983	0.0153768	0.0119556
65.4	0.0374421	0.0225938	0.0125621	0.0151854	0.0123298
65.6	0.0375553	0.0223478	0.0126585	0.0150139	0.0125159
65.8	0.0376955	0.0221596	0.0124498	0.0143744	0.0125783
66	0.0389066	0.0229678	0.0130785	0.0144034	0.0134184
66.2	0.0401456	0.0232137	0.013261	0.0147199	0.0135624
66.4	0.0402299	0.0238836	0.0136689	0.014856	0.0137486
66.6	0.0405181	0.0242006	0.0137972	0.0149239	0.0137517
66.8	0.0405099	0.0241983	0.0140142	0.0147227	0.0137328
67	0.0409439	0.0244891	0.0146922	0.0152353	0.014377
67.2	0.0411287	0.0242784	0.0152123	0.0152462	0.0142338
67.4	0.0405008	0.0245374	0.0152403	0.0154117	0.0139352
67.6	0.040565	0.024644	0.015151	0.0155648	0.0135798
67.8	0.0401619	0.024236	0.0146625	0.0156473	0.0131867
68	0.0396735	0.0239205	0.0148584	0.0160505	0.0129557
68.2	0.0394072	0.0238323	0.0148089	0.0164538	0.0126897
68.4	0.0394237	0.024009	0.0146529	0.0165305	0.0125978
68.6	0.0394923	0.0240588	0.0144434	0.0164748	0.0125054
68.8	0.0390061	0.0244178	0.0141491	0.0163606	0.0127875
69	0.0387234	0.0240112	0.0135182	0.0159478	0.0127317
69.2	0.0382955	0.0242117	0.013623	0.0157685	0.0129986
69.4	0.0379795	0.0238269	0.013573	0.0157352	0.0131527
69.6	0.037906	0.0238141	0.0134708	0.0158532	0.0130111
69.8	0.0379244	0.0232753	0.0130264	0.0156214	0.0129791
70	0.0384569	0.0238433	0.0131277	0.0164955	0.0133961
70.2	0.0385703	0.0241072	0.0128777	0.0165058	0.013459
70.4	0.0381984	0.0244177	0.0130031	0.0163741	0.0139397
70.6	0.0384767	0.0242831	0.0128428	0.0163208	0.013895
70.8	0.038321	0.0242601	0.0130361	0.0166101	0.0139938
71	0.0385844	0.0241325	0.0131611	0.0166281	0.0144647
71.2	0.0382284	0.0243199	0.0134828	0.0162457	0.0143711
71.4	0.0378076	0.0244881	0.0133216	0.0162965	0.0142044
71.6	0.0383973	0.0251238	0.0135278	0.0167376	0.0144303
71.8	0.0388658	0.025276	0.0142061	0.0171823	0.0146234
72	0.0395228	0.0254983	0.0148402	0.0178033	0.0150111
72.2	0.0395677	0.0255694	0.0146275	0.0175165	0.0148731
72.4	0.0399788	0.0263566	0.0149693	0.0176472	0.0150404
72.6	0.0399959	0.0263022	0.0148952	0.0173134	0.014793
72.8	0.039788	0.0263399	0.0149444	0.0173977	0.0146246
73	0.040163	0.0265027	0.0151789	0.0174359	0.0146844
73.2	0.0397277	0.0262376	0.0150854	0.017406	0.0145675
73.4	0.0395818	0.0256574	0.0149023	0.0170845	0.0140754
73.6	0.0399773	0.0255695	0.0148952	0.0173204	0.0138628
73.8	0.0399716	0.0251213	0.0145986	0.0172071	0.0138792
74	0.0397436	0.0252199	0.0146471	0.0174658	0.013861
74.2	0.0397504	0.024964	0.0142452	0.0170609	0.0133484
74.4	0.0394101	0.0243026	0.0142559	0.0169466	0.0131821
74.6	0.0393228	0.0237457	0.0141722	0.0167294	0.0126785
74.8	0.0390241	0.023521	0.0141613	0.0165228	0.0126381
75	0.0389064	0.0234111	0.0144797	0.0160212	0.0126898
75.2	0.0387236	0.0233633	0.0142694	0.0159004	0.0124938
75.4	0.0389289	0.0231025	0.014055	0.0161272	0.0125371
75.6	0.0391662	0.0232568	0.0139708	0.0163766	0.0126754
75.8	0.0393653	0.0227743	0.0138966	0.016427	0.0126999
76	0.0391683	0.0228514	0.0136343	0.0161724	0.0123895
76.2	0.0391894	0.0229321	0.0133162	0.0156272	0.0123634
76.4	0.0395498	0.0235724	0.0134317	0.015767	0.012609
76.6	0.0394485	0.0238458	0.0134595	0.0157284	0.0127137
76.8	0.0395004	0.0244133	0.0134894	0.0161419	0.0129433
77	0.040067	0.0252663	0.0136771	0.0162041	0.0135147
77.2	0.0396998	0.0249722	0.0135806	0.0161689	0.0136959
77.4	0.0394617	0.024792	0.0131986	0.0157739	0.0132476
77.6	0.0403895	0.0258268	0.0142395	0.0168582	0.0141367
77.8	0.0402119	0.0258026	0.0144808	0.0165074	0.0142286
78	0.0406632	0.026299	0.0151292	0.0168589	0.0145561
78.2	0.0410962	0.0268782	0.0157448	0.0172823	0.0150882
78.4	0.0415799	0.026447	0.0165731	0.0173555	0.0151396
78.6	0.0417658	0.0263378	0.0166068	0.0170727	0.0151822
78.8	0.0414798	0.0265087	0.0164843	0.0167596	0.015064
79	0.041142	0.0260968	0.0165322	0.0170074	0.0151666
79.2	0.0414205	0.0260284	0.0159569	0.0169088	0.0151601
79.4	0.0414201	0.0256548	0.0155604	0.0165167	0.015217
79.6	0.0414129	0.0254725	0.0153179	0.0164864	0.0151912
79.8	0.0414713	0.025369	0.0146261	0.0164538	0.0151268
80	0.0416354	0.0254284	0.0139016	0.0159607	0.0152063
80.2	0.042076	0.0254708	0.013955	0.0165084	0.0153598
80.4	0.0420031	0.0254276	0.0138231	0.0165103	0.0154555
80.6	0.0416273	0.0254493	0.0132746	0.0165309	0.0155742
80.8	0.0414911	0.0256478	0.0130339	0.0166372	0.0156537
81	0.0414818	0.0256804	0.0130363	0.0162463	0.0155981
81.2	0.0406457	0.0250226	0.0126358	0.0162588	0.0153921
81.4	0.0405021	0.0251527	0.0125366	0.0163654	0.0155274
81.6	0.0412069	0.0259129	0.0137267	0.0170547	0.0158912
81.8	0.0404228	0.0252576	0.0135368	0.0163955	0.0150549
82	0.0406476	0.0251618	0.0137722	0.0166027	0.0150768
82.2	0.0400347	0.0248055	0.0140537	0.0163591	0.0145613
82.4	0.0397551	0.0241928	0.0143299	0.0157776	0.0139397
82.6	0.0392095	0.0241053	0.0141437	0.0156591	0.013758
82.8	0.0382077	0.024089	0.0140163	0.0150436	0.0128833
83	0.0380362	0.0238121	0.0143145	0.0155502	0.0130443
83.2	0.0384908	0.024074	0.0146158	0.0153201	0.0128069
83.4	0.0387783	0.0240046	0.0150741	0.015661	0.0130447
83.6	0.0389508	0.0240414	0.0152647	0.0163758	0.0128308
83.8	0.0392912	0.0242187	0.0151916	0.01643	0.0126453
84	0.0401114	0.0245909	0.0157087	0.0166913	0.0130279
84.2	0.0406243	0.0244178	0.0163301	0.0171041	0.0133662
84.4	0.0406928	0.0241815	0.0161904	0.0170938	0.0135179
84.6	0.0411873	0.0247632	0.0160354	0.0173757	0.0140076
84.8	0.0416536	0.025287	0.016321	0.0178505	0.0144328
85	0.0415305	0.0249044	0.0156096	0.0175961	0.0141813
85.2	0.0413578	0.0244599	0.0148923	0.0179399	0.0141141
85.4	0.0415908	0.0245414	0.0143838	0.0181211	0.014388
85.6	0.0415628	0.024394	0.0141882	0.0178863	0.0140495
85.8	0.0411924	0.024386	0.0132796	0.0175804	0.0138303
86	0.0416037	0.0245291	0.0133533	0.0177531	0.0141388
86.2	0.0411616	0.0246373	0.0133765	0.017301	0.0139182
86.4	0.0406813	0.0242902	0.0129946	0.0168182	0.0137921
86.6	0.0399894	0.0239976	0.0128277	0.0165335	0.0135857
86.8	0.0394637	0.0243351	0.0132848	0.0162834	0.0133875
87	0.0396465	0.0246206	0.0135014	0.0166983	0.0135313
87.2	0.0396791	0.0248745	0.0136813	0.016321	0.0135066
87.4	0.0397226	0.0247623	0.0139396	0.0167339	0.0138285
87.6	0.0393616	0.0247162	0.0138677	0.0163938	0.0136736
87.8	0.0391551	0.0247759	0.0142281	0.0159281	0.0136454
88	0.0396581	0.0248705	0.0145317	0.0159336	0.013874
88.2	0.0401908	0.0247967	0.0146315	0.0157666	0.0141872
88.4	0.0402902	0.0252061	0.015028	0.0158736	0.0142676
88.6	0.0408245	0.026	0.015228	0.0159954	0.0146376
88.8	0.0404948	0.026276	0.0154362	0.0161895	0.0144698
89	0.0404026	0.0261528	0.0152275	0.0163168	0.0142606
89.2	0.0409673	0.0264653	0.0154703	0.0169386	0.0146883
89.4	0.0415904	0.026723	0.0156359	0.0173995	0.0148574
89.6	0.0422546	0.027369	0.016179	0.0179113	0.0148852
89.8	0.0430601	0.0281426	0.0162003	0.0182265	0.0153765
90	0.043689	0.0283711	0.0169612	0.0188979	0.0155614
90.2	0.0436037	0.028229	0.0168842	0.0191328	0.0155414
90.4	0.043484	0.0280829	0.0169476	0.0192919	0.015748
90.6	0.0440769	0.0284452	0.0174365	0.0200052	0.0160745
90.8	0.0441702	0.0284852	0.0172796	0.0199593	0.0159679
91	0.0444201	0.0285767	0.0171683	0.0202286	0.0163827
91.2	0.0445879	0.0285784	0.0173306	0.0202586	0.0167752
91.4	0.0445475	0.0283275	0.0171623	0.0201241	0.0169607
91.6	0.0441231	0.0281374	0.0170037	0.0197005	0.0166553
91.8	0.0437205	0.0276682	0.0165941	0.0195922	0.0160152
92	0.0438127	0.0275153	0.0161394	0.0192315	0.0154217
92.2	0.0437411	0.0277271	0.0159489	0.0186957	0.0153211
92.4	0.0429592	0.0272153	0.0154152	0.0180817	0.0146177
92.6	0.0427839	0.0271984	0.0151475	0.017899	0.0142974
92.8	0.0420403	0.0268038	0.0147876	0.0174298	0.0138503
93	0.0417223	0.026464	0.0145013	0.0173022	0.0137666
93.2	0.0415698	0.0260885	0.014167	0.0167918	0.0135885
93.4	0.0414389	0.0259944	0.0141787	0.0166351	0.0132053
93.6	0.0415011	0.0259063	0.0139891	0.0167443	0.0131167
93.8	0.0411523	0.0257815	0.0139101	0.0165513	0.0133277
94	0.0411412	0.0254069	0.0136467	0.0167411	0.0132619
94.2	0.0408084	0.0251603	0.013434	0.0163556	0.0135022
94.4	0.0403659	0.0247129	0.0130875	0.0154647	0.0133615
94.6	0.0405942	0.0244017	0.0129585	0.0152911	0.013368
94.8	0.0409158	0.0245693	0.0132483	0.0150446	0.0137692
95	0.0411902	0.025224	0.0137534	0.015363	0.0143511
95.2	0.0412808	0.0254731	0.0139749	0.015684	0.0145024
95.4	0.0412148	0.0257059	0.0141794	0.0159689	0.0145189
95.6	0.0409254	0.0256203	0.0142565	0.0160002	0.014143
95.8	0.0411336	0.025498	0.0137872	0.0158542	0.0136627
96	0.0414309	0.0258593	0.0139533	0.0159981	0.0138177
96.2	0.041412	0.0256217	0.0136248	0.0154041	0.0138283
96.4	0.0413078	0.0252688	0.0134203	0.0156794	0.0139318
96.6	0.0418127	0.0258601	0.0141496	0.016352	0.0145199
96.8	0.0417165	0.0259049	0.0143267	0.0165323	0.014598
97	0.0417631	0.0262225	0.014843	0.0171377	0.0150533
97.2	0.0420524	0.026147	0.0154269	0.0172229	0.015604
97.4	0.0426046	0.0269817	0.0161132	0.0182109	0.0161965
97.6	0.0428763	0.0268952	0.0165846	0.0187189	0.0164567
97.8	0.0428964	0.026953	0.0171202	0.0190232	0.0165532
98	0.0431331	0.0266078	0.017466	0.0188513	0.0168635
98.2	0.0428828	0.0266643	0.0179043	0.0185178	0.0170807
98.4	0.0427932	0.0265287	0.0176702	0.0180077	0.0164948
98.6	0.0428085	0.026813	0.0180878	0.0185887	0.0163698
98.8	0.043432	0.0276234	0.0182411	0.0194419	0.0163994
99	0.0434771	0.02797	0.0183143	0.0199271	0.0164427
99.2	0.0435347	0.0281767	0.0182981	0.0202302	0.0162033
99.4	0.0434338	0.0277101	0.0179939	0.0202262	0.0159259
99.6	0.0435581	0.0278105	0.0172555	0.0196262	0.0154965
99.8	0.0436073	0.0274591	0.0165475	0.0194949	0.0150216
100	0.043692	0.0273073	0.0160261	0.0192625	0.0151376
100.2	0.0432269	0.0268439	0.0150961	0.0186415	0.0147682
100.4	0.0434985	0.0273136	0.0153414	0.0191607	0.0149648
100.6	0.0432306	0.0271041	0.0147718	0.0185597	0.0147528
100.8	0.0430296	0.0272375	0.0145773	0.0178174	0.0148631
101	0.0429813	0.0272657	0.0145195	0.0175369	0.0152766
101.2	0.0430886	0.0275137	0.0145399	0.0174027	0.0158964
101.4	0.0429433	0.0280024	0.0145745	0.0175237	0.015864
101.6	0.0424963	0.0274707	0.0147158	0.0170305	0.0156196
101.8	0.0427472	0.0274085	0.0147754	0.0169815	0.0159564
102	0.0420833	0.026813	0.0147464	0.0162231	0.0161205
102.2	0.0415008	0.0269503	0.0143251	0.0160313	0.0158529
102.4	0.0413172	0.026873	0.0135551	0.0160905	0.0156574
102.6	0.0416242	0.0270947	0.0135139	0.0168753	0.0160159
102.8	0.0420544	0.0271632	0.0132465	0.0173452	0.0160896
103	0.0423191	0.0269397	0.0132498	0.0173703	0.0159742
103.2	0.0425336	0.0266943	0.0130182	0.0177252	0.0155361
103.4	0.0424847	0.0265328	0.013221	0.0178854	0.015428
103.6	0.0428137	0.0273455	0.0136209	0.0181117	0.0154971
103.8	0.0426134	0.0271434	0.0140367	0.0181427	0.0152665
104	0.0431504	0.0276393	0.014496	0.0181329	0.0157164
104.2	0.0428681	0.0276563	0.0150959	0.0180496	0.0155609
104.4	0.0435794	0.0283127	0.0160855	0.0182399	0.0160317
104.6	0.0437259	0.0284101	0.0164434	0.0180615	0.0162741
104.8	0.0439109	0.0285286	0.017069	0.0174556	0.0164662
105	0.0441943	0.0284083	0.017471	0.0173391	0.0166879
105.2	0.0442119	0.0288787	0.0179888	0.0176604	0.0171667
105.4	0.0438661	0.0288738	0.0186724	0.0175878	0.0175079
105.6	0.0438607	0.028471	0.018524	0.017063	0.017788
105.8	0.0439516	0.0281702	0.0183047	0.016911	0.0182058
106	0.0433658	0.0272887	0.0177358	0.0160072	0.0177485
106.2	0.0437074	0.0273604	0.0173414	0.0161243	0.0178429
106.4	0.04392	0.0267629	0.0168885	0.0161468	0.0176694
106.6	0.0442115	0.026536	0.0166056	0.0160604	0.0172068
106.8	0.0444282	0.0263098	0.0166681	0.0162975	0.0168552
107	0.0447596	0.026148	0.0162283	0.0163466	0.0164923
107.2	0.0444636	0.0264554	0.0161181	0.016698	0.0163446
107.4	0.0444642	0.026961	0.0165165	0.0171314	0.0165918
107.6	0.045082	0.0271476	0.016753	0.017813	0.0164853
107.8	0.0451118	0.0271928	0.0168122	0.0178919	0.015961
108	0.0456058	0.0275651	0.0168379	0.0182963	0.016204
108.2	0.0449984	0.0275499	0.016795	0.0178995	0.0157855
108.4	0.0453795	0.027888	0.0170815	0.0187427	0.0158944
108.6	0.0451118	0.0274775	0.0168994	0.0183501	0.0156561
108.8	0.0444922	0.0268922	0.0160433	0.0178334	0.0150961
109	0.0445855	0.0273559	0.0159534	0.0182777	0.0151835
109.2	0.0444273	0.0276002	0.0160325	0.018493	0.0154631
109.4	0.044434	0.0277661	0.0159287	0.0184664	0.0153196
109.6	0.0443307	0.0276542	0.0153462	0.0177402	0.0149835
109.8	0.0439076	0.02766	0.0152033	0.0176235	0.0147284
110	0.0437459	0.027221	0.0146592	0.0167512	0.0140171
110.2	0.043812	0.0275611	0.0153741	0.0171387	0.0142622
110.4	0.0432933	0.0271136	0.0154649	0.0170797	0.0141502
110.6	0.0431568	0.0273712	0.0155708	0.0169234	0.0144217
110.8	0.0431164	0.0275711	0.0156717	0.0172855	0.0148548
111	0.0427396	0.0278281	0.0155779	0.0173393	0.0152323
111.2	0.04268	0.0279049	0.0157043	0.0176147	0.0155144
111.4	0.0438246	0.0283432	0.0162188	0.0181379	0.0159169
111.6	0.0439136	0.0280564	0.0162889	0.0180711	0.0157146
111.8	0.043407	0.0281199	0.0163922	0.0180425	0.0157684
112	0.0431035	0.0277208	0.0160868	0.0180251	0.0159181
112.2	0.0424407	0.0273466	0.0160866	0.0177833	0.0157525
112.4	0.0431364	0.0275729	0.0165192	0.0182798	0.0160439
112.6	0.0433228	0.027607	0.0166248	0.017877	0.0162659
112.8	0.0432652	0.027554	0.0162943	0.0179656	0.0162803
113	0.0436119	0.0279449	0.0166117	0.0180112	0.0163597
113.2	0.0442305	0.0284926	0.0170416	0.0178988	0.0163918
113.4	0.0444179	0.0288996	0.0170953	0.0179138	0.0160819
113.6	0.0441842	0.0286135	0.0167478	0.0173151	0.0157369
113.8	0.0443132	0.0287884	0.0167517	0.0174077	0.0157654
114	0.0442877	0.028812	0.0168489	0.0172066	0.0153705
114.2	0.0449813	0.0297996	0.018042	0.0182638	0.0161305
114.4	0.0442656	0.0293689	0.0175253	0.0178133	0.0158053
114.6	0.0447244	0.0296969	0.0173554	0.0178211	0.0158908
114.8	0.0448819	0.0298253	0.0170375	0.0181514	0.0158087
115	0.0448844	0.0298692	0.0171311	0.017922	0.0157977
115.2	0.0452458	0.0299774	0.017312	0.0182429	0.0158391
115.4	0.0450895	0.029844	0.0170701	0.0184246	0.0155651
115.6	0.0440052	0.0293399	0.0167077	0.0188988	0.0155638
115.8	0.0435202	0.0288839	0.0164442	0.0191116	0.0154133
116	0.0428105	0.0281813	0.0154292	0.018727	0.015016
116.2	0.0427732	0.0286347	0.0159549	0.018951	0.0157339
116.4	0.0430335	0.028625	0.0161916	0.0188581	0.016014
116.6	0.0433189	0.02872	0.0166028	0.019331	0.0170141
116.8	0.0431379	0.0279308	0.0161897	0.0193148	0.0166156
117	0.0437742	0.0283822	0.0163403	0.0196586	0.0167248
117.2	0.0440171	0.0283928	0.0160424	0.0196159	0.0167415
117.4	0.0440459	0.0280447	0.0157531	0.0196055	0.0168718
117.6	0.0444304	0.0276879	0.0154829	0.0195877	0.0166901
117.8	0.0448317	0.0283262	0.0157548	0.019801	0.0168401
118	0.0452854	0.0286575	0.0160745	0.0201628	0.0167672
118.2	0.0462538	0.0290774	0.0163259	0.0205794	0.0172041
118.4	0.0462277	0.0288546	0.0163281	0.0201356	0.0171941
118.6	0.0472406	0.0291494	0.0165779	0.0204752	0.0178334
118.8	0.0469938	0.0295402	0.0167963	0.0203633	0.0181295
119	0.0466083	0.0293872	0.0170348	0.0201446	0.0181397
119.2	0.0464634	0.0295794	0.0172416	0.0202369	0.018149
119.4	0.0455613	0.0293058	0.0168904	0.0199673	0.018138
119.6	0.0451555	0.0296437	0.0169954	0.019911	0.0181638
119.8	0.0449744	0.0293289	0.017195	0.0195527	0.01782
120	0.0444367	0.0290804	0.0170106	0.0190288	0.0172389
120.2	0.0448487	0.0295448	0.0178078	0.0193476	0.0177172
120.4	0.044672	0.0290864	0.0176105	0.0189987	0.017581
120.6	0.0448059	0.029393	0.0178808	0.0190402	0.018048
120.8	0.0442753	0.0286791	0.0175132	0.0191541	0.0166943
121	0.0444372	0.0290699	0.0176435	0.0193909	0.0169826
121.2	0.0441472	0.028806	0.0174806	0.0195996	0.0167601
121.4	0.0440181	0.0285377	0.0174349	0.0195454	0.016481
121.6	0.0439363	0.0280599	0.0171872	0.0191161	0.0159538
121.8	0.0439043	0.02843	0.0174347	0.0193036	0.0159939
122	0.044432	0.0286827	0.017479	0.0194395	0.0163296
122.2	0.0446365	0.0288779	0.0171989	0.0195798	0.0164884
122.4	0.0453434	0.0297228	0.0174357	0.0200444	0.0171458
122.6	0.0455656	0.0300194	0.0170712	0.0202495	0.0173921
122.8	0.0456612	0.0307636	0.0173876	0.0205518	0.0176781
123	0.0452282	0.0302981	0.0170137	0.0201125	0.0171003
123.2	0.0455344	0.0304725	0.017311	0.0201497	0.0174383
123.4	0.0456124	0.0308432	0.017717	0.0204445	0.0180695
123.6	0.0458683	0.0307525	0.0179046	0.0208257	0.0178846
123.8	0.0464176	0.0304453	0.0177411	0.020627	0.0178523
124	0.046919	0.0303867	0.0175471	0.0202332	0.018154
124.2	0.046872	0.0309716	0.0173806	0.0199705	0.0187802
124.4	0.0467354	0.0308416	0.017447	0.019839	0.0189208
124.6	0.0469691	0.0311055	0.0179513	0.020152	0.0189164
124.8	0.0470924	0.0308738	0.018211	0.0203707	0.0186369
125	0.0472869	0.030631	0.018206	0.0201299	0.0189902
125.2	0.0472332	0.0303861	0.0181613	0.0204035	0.0186741
125.4	0.0470817	0.0302621	0.0182807	0.0199812	0.0185891
125.6	0.0472752	0.0301319	0.0184176	0.019731	0.0184752
125.8	0.0475091	0.0308256	0.0186379	0.0204017	0.0186051
126	0.0479593	0.0311167	0.0183303	0.0201732	0.0183007
126.2	0.047856	0.03116	0.0181312	0.0201887	0.0180761
126.4	0.0484266	0.0315757	0.0181805	0.0201862	0.0179363
126.6	0.0481685	0.0315417	0.017942	0.0199925	0.0176619
126.8	0.0480237	0.0317813	0.0177157	0.0201763	0.0177292
127	0.0473097	0.0310805	0.0174279	0.0197506	0.0174687
127.2	0.0478659	0.0314951	0.0177107	0.0201035	0.0179516
127.4	0.0482668	0.0315969	0.0179788	0.020229	0.0180572
127.6	0.0477947	0.0311176	0.0176486	0.0196808	0.0178331
127.8	0.0477844	0.0309036	0.0172774	0.0189432	0.0176659
128	0.0477867	0.030592	0.0173507	0.0186414	0.017967
128.2	0.0475267	0.0310522	0.0171981	0.0189091	0.0178591
128.4	0.0473882	0.0305078	0.0174041	0.0187067	0.017633
128.6	0.047832	0.0307682	0.0177892	0.019056	0.017973
128.8	0.0477573	0.0304008	0.0177312	0.0194271	0.0180852
129	0.0479894	0.0303761	0.0176043	0.0201456	0.0181604
129.2	0.0477284	0.0304511	0.0175696	0.0203862	0.0178668
129.4	0.0478537	0.0304875	0.0183578	0.0207506	0.0180768
129.6	0.0480033	0.0300729	0.0185129	0.0208974	0.0178389
129.8	0.0478297	0.0299751	0.0182632	0.0207701	0.0173304
130	0.0480343	0.0297527	0.0181944	0.0202511	0.0168878
130.2	0.0474547	0.0288163	0.0175762	0.0196694	0.0164892
130.4	0.0474815	0.028611	0.0171689	0.019082	0.0163154
130.6	0.0469299	0.0286706	0.0167002	0.0188318	0.0163237
130.8	0.0471281	0.029098	0.0165347	0.0190894	0.0163341
131	0.0474104	0.0295417	0.0170188	0.0190391	0.0165224
131.2	0.0473076	0.0298366	0.0168775	0.018692	0.0164475
131.4	0.0469477	0.0293756	0.0169613	0.0182168	0.0164001
131.6	0.046226	0.0292494	0.0164462	0.0171685	0.0160315
131.8	0.0466116	0.0295217	0.0165886	0.0170177	0.0159472
132	0.0467471	0.0296582	0.0165495	0.0170497	0.0162907
132.2	0.0466081	0.0306305	0.0165817	0.0175423	0.0168344
132.4	0.0467824	0.0307947	0.017132	0.0179755	0.0172979
132.6	0.0472914	0.0315841	0.0178818	0.0192867	0.0178015
132.8	0.0474861	0.0319231	0.0184209	0.0203533	0.0182587
133	0.047602	0.0322921	0.0187686	0.020616	0.0183947
133.2	0.047419	0.03237	0.0189478	0.020431	0.018008
133.4	0.0480036	0.0325529	0.0199976	0.0214285	0.0186632
133.6	0.0480442	0.0326014	0.0200685	0.0214807	0.018759
133.8	0.0477545	0.0323312	0.0198396	0.0213	0.0185119
134	0.0475861	0.0323051	0.0196145	0.0214174	0.0184916
134.2	0.046729	0.0312053	0.0189311	0.0208895	0.0176455
134.4	0.0468757	0.0314372	0.0188991	0.021126	0.0177557
134.6	0.0468202	0.0315928	0.0189178	0.0214837	0.0179741
134.8	0.0474746	0.0318625	0.0190979	0.0217388	0.0182876
135	0.0475291	0.0317781	0.0186517	0.0214118	0.0183866
135.2	0.0468826	0.0308618	0.0184627	0.0207092	0.0185886
135.4	0.0467002	0.0306771	0.0181478	0.0200864	0.0181057
135.6	0.0468469	0.0304089	0.0177019	0.0191512	0.0178626
135.8	0.0470703	0.0306113	0.0181155	0.0197452	0.0181009
136	0.0470421	0.0307917	0.0180248	0.0195954	0.0182459
136.2	0.0471586	0.0311326	0.018306	0.0198801	0.0185412
136.4	0.0476355	0.0312009	0.0186133	0.0203654	0.0184112
136.6	0.0480026	0.0316812	0.0192204	0.0207078	0.0186206
136.8	0.0480636	0.0310045	0.0190454	0.020158	0.0182713
137	0.0479659	0.0308038	0.0188152	0.0197752	0.0179522
137.2	0.048048	0.0309104	0.0189672	0.0198055	0.0178696
137.4	0.0480574	0.0309954	0.0191241	0.020303	0.0183206
137.6	0.0470564	0.0307149	0.0187072	0.0197859	0.0178837
137.8	0.0462258	0.0299247	0.0180465	0.0193811	0.0172839
138	0.0456759	0.0301396	0.0175203	0.0194017	0.017187
138.2	0.0452999	0.0297858	0.017426	0.0196454	0.016808
138.4	0.0456054	0.0303008	0.0174588	0.0199073	0.0174343
138.6	0.0457036	0.0304186	0.0175851	0.0198607	0.0179724
138.8	0.0463227	0.0308325	0.0177951	0.0200859	0.018443
139	0.0465566	0.0310219	0.0177713	0.0202265	0.0185188
139.2	0.0465424	0.0311071	0.0183083	0.0204902	0.0190558
139.4	0.0469906	0.0315704	0.0184256	0.020643	0.0187975
139.6	0.0477962	0.0315695	0.0187469	0.0208831	0.0194721
139.8	0.048236	0.0322565	0.0192527	0.0218644	0.0195294
140	0.0484972	0.0330125	0.0191779	0.0218047	0.0195494
140.2	0.0484853	0.0330296	0.0187715	0.0222444	0.0194539
140.4	0.049192	0.0335097	0.0190754	0.0225744	0.0192445
140.6	0.0494317	0.033732	0.019718	0.02285	0.0192302
140.8	0.0494118	0.0332703	0.0190729	0.0225533	0.0189863
141	0.0498151	0.0336832	0.0193012	0.0227815	0.0190943
141.2	0.0494087	0.0337795	0.0194118	0.022208	0.0188784
141.4	0.0490134	0.0332346	0.0187883	0.0216545	0.0183337
141.6	0.0481996	0.0326221	0.0184978	0.0206199	0.0178732
141.8	0.0482309	0.0323356	0.0184969	0.0205495	0.0179831
142	0.0482158	0.0328656	0.0185603	0.0204281	0.0178458
142.2	0.0480677	0.032483	0.0184247	0.019959	0.0173308
142.4	0.0482676	0.0326746	0.0185697	0.0193484	0.0176492
142.6	0.0486551	0.0327074	0.0185231	0.0194247	0.01791
142.8	0.0486859	0.0329256	0.0188245	0.019296	0.0179167
143	0.0485854	0.0322504	0.0183418	0.0188688	0.0176173
143.2	0.0485471	0.0318119	0.0184959	0.0191482	0.0178173
143.4	0.0486715	0.0316082	0.0187554	0.0189072	0.0177157
143.6	0.0484041	0.0314239	0.0188039	0.018814	0.0178368
143.8	0.0482092	0.031431	0.0186351	0.0189308	0.0178218
144	0.0479324	0.0315163	0.0182851	0.0191405	0.0179754
144.2	0.0478701	0.0314598	0.01845	0.0194023	0.0182549
144.4	0.0483266	0.0317615	0.018923	0.0197174	0.0180949
144.6	0.0482132	0.0316382	0.0189746	0.0198228	0.0184155
144.8	0.0483241	0.0311479	0.0184795	0.0195089	0.0184875
145	0.0483153	0.0308629	0.018467	0.0194662	0.018157
145.2	0.0480065	0.0307473	0.0187391	0.0195546	0.0184203
145.4	0.0476764	0.029994	0.0185667	0.0195506	0.0181434
145.6	0.0476166	0.0298057	0.0185674	0.0196552	0.0184209
145.8	0.0482729	0.0300314	0.0187079	0.0202247	0.0187229
146	0.0482468	0.0302795	0.0186159	0.0202409	0.0186777
146.2	0.0480238	0.029996	0.0184296	0.0199965	0.0185304
146.4	0.0480952	0.0301835	0.0182208	0.0200934	0.0187574
146.6	0.0485818	0.0304944	0.0180704	0.0206033	0.0187825
146.8	0.0487715	0.0308163	0.0183124	0.0207434	0.0186864
147	0.0491984	0.0306071	0.0178268	0.0207409	0.0187041
147.2	0.0490882	0.0313848	0.0181411	0.0212842	0.019005
147.4	0.0494865	0.0320146	0.0183052	0.0215839	0.0191416
147.6	0.0491146	0.0320882	0.0177977	0.0214089	0.0188366
147.8	0.0490532	0.0323828	0.0176929	0.0213473	0.018819
148	0.0487055	0.0326886	0.0175196	0.0213318	0.0186262
148.2	0.0486882	0.0330918	0.0177475	0.0215151	0.0185311
148.4	0.0487549	0.0331645	0.0175591	0.0217086	0.0181318
148.6	0.0484411	0.033125	0.0175271	0.0213477	0.0180902
148.8	0.0481676	0.0328776	0.0171626	0.0216022	0.0179243
149	0.0479812	0.0328467	0.017023	0.0220952	0.0180508
149.2	0.0477938	0.0325204	0.017179	0.0221558	0.0184916
149.4	0.0476233	0.0322024	0.0169627	0.0219363	0.0181251
149.6	0.0480272	0.0317742	0.0163481	0.0219671	0.0180698
149.8	0.0483729	0.032	0.0165038	0.0221703	0.0181542
150	0.0484058	0.0315089	0.0167085	0.021978	0.0182022
150.2	0.0485471	0.0309629	0.0163641	0.0221016	0.0178135
150.4	0.0489319	0.0309732	0.0164449	0.0221812	0.0181351
150.6	0.0499516	0.0312876	0.0171543	0.0223153	0.0184652
150.8	0.0503261	0.0307196	0.0173099	0.0219842	0.0182942
151	0.0502017	0.0304275	0.0171943	0.022079	0.0184459
151.2	0.0504159	0.0307175	0.0172355	0.0224114	0.0184622
151.4	0.0510717	0.0310056	0.0176979	0.0225478	0.0183688
151.6	0.0504571	0.0310964	0.0179108	0.0222791	0.0182268
151.8	0.0509891	0.0317054	0.0191583	0.0231211	0.0188507
152	0.0510164	0.0321934	0.0197719	0.0235068	0.0191168
152.2	0.0511405	0.0324397	0.0202311	0.0239533	0.0194298
152.4	0.0509796	0.0323672	0.0203579	0.0238357	0.0196324
152.6	0.0513129	0.0326783	0.020986	0.0236827	0.0203099
152.8	0.0512241	0.0329933	0.0208399	0.0237813	0.0208495
153	0.0513217	0.0331265	0.0209674	0.0231479	0.0212179
153.2	0.051299	0.0332244	0.0208585	0.0227761	0.0212969
153.4	0.0509896	0.0330932	0.0206002	0.0223961	0.0211056
153.6	0.0509396	0.0330405	0.0203113	0.0223292	0.021427
153.8	0.0508997	0.0334385	0.0207859	0.0223232	0.02172
154	0.0513855	0.0338883	0.0211337	0.0225135	0.0220971
154.2	0.0508959	0.0337509	0.0204251	0.0222066	0.0217326
154.4	0.0505498	0.03358	0.0201904	0.0219087	0.0215961
154.6	0.0507017	0.0334505	0.0205437	0.0217058	0.0214632
154.8	0.0500832	0.0326621	0.0200595	0.0214558	0.0208787
155	0.0494893	0.0326482	0.0194862	0.0215755	0.0203377
155.2	0.0497623	0.03276	0.0192005	0.0215635	0.0195466
155.4	0.0496248	0.0330859	0.0193489	0.0218415	0.0189787
155.6	0.0491968	0.0330145	0.0195447	0.0222925	0.0186986
155.8	0.0494238	0.0330674	0.0197895	0.0228123	0.018343
156	0.0494102	0.0329161	0.0194887	0.0225587	0.017985
156.2	0.0493724	0.0321953	0.019173	0.0221132	0.0179749
156.4	0.0492018	0.0321866	0.0189622	0.0217597	0.0180545
156.6	0.0488807	0.0320163	0.0188118	0.0211938	0.0183404
156.8	0.0485195	0.0320877	0.0181122	0.0210701	0.0183726
157	0.0484734	0.0318958	0.0175928	0.0204547	0.0180522
157.2	0.0484564	0.0320485	0.0177739	0.0207462	0.018162
157.4	0.0483299	0.0319664	0.0177775	0.020593	0.0183569
157.6	0.0484204	0.0321844	0.0179652	0.0206192	0.0183466
157.8	0.0483049	0.0320865	0.0182678	0.0206164	0.0180436
158	0.0487154	0.0321879	0.0183849	0.0208073	0.0183386
158.2	0.0487312	0.0318648	0.0179837	0.0207508	0.0184364
158.4	0.0492283	0.0321177	0.0181814	0.0211855	0.0191075
158.6	0.0495176	0.0321945	0.0185919	0.021207	0.0194778
158.8	0.0496374	0.0319257	0.0183708	0.0212876	0.0192632
159	0.0501793	0.0322877	0.018542	0.0217696	0.0191502
159.2	0.0509419	0.0325967	0.0188283	0.0222955	0.0193239
159.4	0.0508511	0.0326899	0.0192684	0.022239	0.019536
159.6	0.051048	0.0326746	0.0197601	0.0223693	0.01969
159.8	0.0513733	0.0326296	0.0196956	0.0220024	0.0196178
160	0.0518934	0.032912	0.0196976	0.0221644	0.0200697
160.2	0.0515162	0.0327799	0.0199605	0.0219642	0.0205001
160.4	0.0511506	0.0331115	0.0197818	0.0221094	0.0206489
160.6	0.0511247	0.0330493	0.0198239	0.0221787	0.0205449
160.8	0.0514732	0.0334051	0.0197014	0.0225533	0.020507
161	0.0516481	0.0335551	0.0200599	0.0224424	0.020619
161.2	0.0518904	0.0339469	0.0209503	0.0226327	0.0208072
161.4	0.0516812	0.0338539	0.0207082	0.0222699	0.020503
161.6	0.0515768	0.0336584	0.0206344	0.0219051	0.0199321
161.8	0.0514238	0.0331912	0.0205676	0.0215771	0.0199745
162	0.0516951	0.0333298	0.0209199	0.0216439	0.0203555
162.2	0.0516521	0.0336354	0.0207063	0.0217369	0.0208263
162.4	0.0513829	0.0333798	0.0206741	0.0212819	0.0212362
162.6	0.0510406	0.0332768	0.0204267	0.02051	0.0208411
162.8	0.0512178	0.0334675	0.0203954	0.0204587	0.020526
163	0.0508719	0.0333282	0.0197922	0.0201805	0.0200624
163.2	0.0506408	0.0331557	0.0196083	0.0202017	0.0199124
163.4	0.0502288	0.0329518	0.0197279	0.0198457	0.0196126
163.6	0.0500712	0.0326426	0.0194198	0.0195664	0.0185723
163.8	0.0499788	0.0323746	0.0191464	0.0194353	0.0181664
164	0.0494451	0.0319068	0.0186259	0.0197648	0.0179749
164.2	0.0495363	0.0320218	0.0190648	0.0204612	0.018035
164.4	0.0502673	0.0326046	0.0194324	0.0208429	0.0180922
164.6	0.0504369	0.0326499	0.0194283	0.0214591	0.017831
164.8	0.0503384	0.0328591	0.0197503	0.021783	0.0183495
165	0.0503611	0.0330267	0.0200241	0.0220128	0.0187414
165.2	0.0499884	0.0332162	0.0197874	0.0213524	0.0183661
165.4	0.0494341	0.0334665	0.018933	0.0212751	0.0184307
165.6	0.0499111	0.0337337	0.0190047	0.0211807	0.0186113
165.8	0.0498632	0.0339725	0.0191275	0.021554	0.019188
166	0.0498865	0.0341744	0.0193033	0.0214717	0.0198664
166.2	0.0498512	0.0341441	0.0189277	0.0210031	0.0203238
166.4	0.0497162	0.0339411	0.0183324	0.0203414	0.0201154
166.6	0.049774	0.0341562	0.0180114	0.0198304	0.0197625
166.8	0.0495662	0.0336532	0.0175222	0.019993	0.0192674
167	0.0496415	0.0334585	0.0172303	0.0199937	0.0195906
167.2	0.0499132	0.0335471	0.017528	0.0203463	0.0197343
167.4	0.0500884	0.0332604	0.0176754	0.0202674	0.0194007
167.6	0.050175	0.0326221	0.0174404	0.0201884	0.0185478
167.8	0.0503847	0.0321287	0.0176486	0.0204674	0.0185339
168	0.0503268	0.0314453	0.0174142	0.0202818	0.0184407
168.2	0.0509148	0.0320678	0.0184573	0.0210379	0.0187715
168.4	0.0510492	0.0325572	0.0190394	0.0210926	0.019049
168.6	0.0506702	0.0328119	0.0195096	0.0217791	0.0191941
168.8	0.0503913	0.0329639	0.0203288	0.0218873	0.0195741
169	0.0502543	0.0333573	0.0204939	0.0219534	0.0197263
169.2	0.0498334	0.0335635	0.0205852	0.021946	0.0197554
169.4	0.0500491	0.0343502	0.0208593	0.0229833	0.0203811
169.6	0.0509746	0.0347855	0.0216699	0.0232419	0.0206161
169.8	0.0506273	0.0352144	0.0217427	0.0240035	0.0208222
170	0.0505343	0.0350115	0.0216041	0.0236432	0.0208883
170.2	0.0509397	0.0352072	0.0217678	0.023685	0.0208611
170.4	0.0512464	0.035497	0.0218385	0.023854	0.0211548
170.6	0.0517649	0.035724	0.0219847	0.024103	0.0213122
170.8	0.051589	0.0354486	0.0216403	0.0246227	0.0212569
171	0.0529289	0.0360228	0.0219355	0.0249796	0.0219206
171.2	0.0531116	0.0356232	0.0216958	0.0247119	0.02119
171.4	0.0536379	0.0352924	0.0213717	0.0244317	0.0210017
171.6	0.053878	0.0348719	0.0209113	0.0242653	0.0207203
171.8	0.0534931	0.0339094	0.0202629	0.0233684	0.0204781
172	0.0532775	0.0336984	0.0195857	0.0227468	0.020303
172.2	0.0534179	0.0342743	0.0201457	0.0230411	0.0208432
172.4	0.0534911	0.0341639	0.0202501	0.0228491	0.0205354
172.6	0.0531319	0.0336663	0.0200815	0.0229967	0.0204945
172.8	0.0525728	0.0331764	0.0196619	0.0229706	0.0205488
173	0.0525086	0.0333951	0.0194919	0.0228858	0.0204836
173.2	0.0522477	0.0329942	0.019516	0.0227432	0.02018
173.4	0.0520605	0.0332368	0.0196739	0.0227311	0.0202609
173.6	0.0518371	0.0331401	0.0195487	0.0222064	0.0197271
173.8	0.0511636	0.0330962	0.0195184	0.0223467	0.0199623
174	0.0513745	0.0331762	0.0197818	0.0220267	0.0200126
174.2	0.0521241	0.033692	0.0204221	0.0226507	0.0203664
174.4	0.0527168	0.0342967	0.0210802	0.0235419	0.0206337
174.6	0.0534457	0.0350223	0.0213704	0.0243866	0.0209297
174.8	0.0528891	0.0348083	0.0214678	0.0244335	0.0208206
175	0.0532334	0.0350025	0.0218046	0.0240612	0.020707
175.2	0.0530815	0.0349787	0.0218275	0.023984	0.0208436
175.4	0.0529693	0.0351133	0.0217487	0.023779	0.0211684
175.6	0.0525916	0.034924	0.0216163	0.0237478	0.0209911
175.8	0.0524349	0.0345429	0.0213684	0.0237732	0.0208465
176	0.0523416	0.0348392	0.0214972	0.0238184	0.0209216
176.2	0.0525214	0.0352245	0.0222297	0.0244345	0.02139
176.4	0.0521892	0.034736	0.0220133	0.024439	0.0209259
176.6	0.0516745	0.0347707	0.0217574	0.0244294	0.0212116
176.8	0.0515405	0.0351095	0.0217894	0.0244805	0.0212982
177	0.0516363	0.0348717	0.0217552	0.0243214	0.0207733
177.2	0.0518347	0.0346872	0.0219532	0.0242191	0.0205973
177.4	0.0515995	0.0348058	0.0218176	0.0238945	0.0205261
177.6	0.0517552	0.0348728	0.0217058	0.0236852	0.0202725
177.8	0.0517662	0.0343565	0.0212007	0.023385	0.0204426
178	0.0521963	0.0346401	0.0211117	0.0234474	0.0202144
178.2	0.0528619	0.0350009	0.0212131	0.0236999	0.0199273
178.4	0.0531477	0.0352497	0.0216417	0.0236818	0.0200643
178.6	0.0532278	0.0355399	0.0213699	0.0230716	0.0200639
178.8	0.0521887	0.0350716	0.0207896	0.022479	0.0196217
179	0.0522323	0.0352515	0.0208998	0.0226322	0.0195491
179.2	0.0518375	0.034762	0.0204436	0.022406	0.0194358
179.4	0.0515269	0.0342077	0.0200431	0.0221138	0.0190818
179.6	0.0513119	0.0338565	0.0201518	0.0225422	0.0192954
179.8	0.0515249	0.033946	0.0203923	0.0229042	0.0194524
180	0.0514605	0.034239	0.0206342	0.0235111	0.0198419
180.2	0.0515973	0.0348817	0.0215334	0.0242742	0.0205016
180.4	0.0517328	0.0351507	0.0220404	0.0245987	0.0212708
180.6	0.051514	0.0347987	0.021637	0.0241888	0.0209928
180.8	0.0521097	0.0347337	0.0215585	0.0247457	0.0214657
181	0.0525879	0.0346966	0.021539	0.024978	0.0212796
181.2	0.0531862	0.0347124	0.0220458	0.024902	0.0214741
181.4	0.0533619	0.0347263	0.0220067	0.024417	0.0216207
181.6	0.0539125	0.0347366	0.0217699	0.0245994	0.0216104
181.8	0.0541227	0.0345596	0.0213118	0.0241809	0.0217532
182	0.0541229	0.0349673	0.0214683	0.0244494	0.0219151
182.2	0.0538241	0.0348671	0.0214032	0.0239116	0.0215081
182.4	0.0538213	0.0348675	0.0213551	0.0237353	0.0213568
182.6	0.0533982	0.0348409	0.0205779	0.0234688	0.0207305
182.8	0.0523749	0.0343654	0.02028	0.0232447	0.0204241
183	0.0523431	0.0339318	0.0201765	0.0231647	0.0198897
183.2	0.0524982	0.0336876	0.0200173	0.0229458	0.0199231
183.4	0.0529468	0.0337021	0.0199825	0.0231747	0.0200257
183.6	0.0528529	0.0337958	0.0203084	0.0232258	0.020078
183.8	0.0526227	0.0340797	0.0200887	0.0234528	0.0197215
184	0.0523229	0.0340999	0.0201222	0.0235225	0.0196165
184.2	0.0520788	0.0341856	0.0201931	0.0228207	0.0197597
184.4	0.051867	0.0341111	0.0201185	0.0224126	0.019814
184.6	0.0519646	0.0338411	0.0197462	0.0221031	0.0193972
184.8	0.0527012	0.0341586	0.0197983	0.022433	0.0198512
185	0.0529437	0.0343111	0.0199893	0.0225339	0.0196949
185.2	0.0535986	0.0348079	0.0205097	0.0226539	0.020203
185.4	0.0539416	0.0355274	0.0205848	0.0226801	0.0208033
185.6	0.0542924	0.0357651	0.0206727	0.0229866	0.0209221
185.8	0.0539997	0.0360788	0.0207852	0.0231894	0.021327
186	0.0536366	0.0360471	0.0207779	0.0234022	0.0215691
186.2	0.0536871	0.0362519	0.020797	0.0232958	0.0213628
186.4	0.0541298	0.0365658	0.021007	0.0235083	0.021132
186.6	0.0541712	0.0363477	0.0209875	0.0231276	0.0211115
186.8	0.0543969	0.0363375	0.0216278	0.0232407	0.021186
187	0.0554803	0.0365984	0.0224386	0.0237941	0.021538
187.2	0.0557247	0.0367724	0.0228211	0.0239446	0.0219164
187.4	0.0556109	0.0365293	0.0231113	0.0242004	0.0218557
187.6	0.0553345	0.0362844	0.023538	0.0241699	0.0218108
187.8	0.0546398	0.0358093	0.0232318	0.0239533	0.0214559
188	0.0542166	0.0352411	0.0233553	0.0235984	0.0213355
188.2	0.0538008	0.0353284	0.023381	0.0240111	0.0216344
188.4	0.0532092	0.034787	0.023151	0.024048	0.0214071
188.6	0.0533265	0.0347067	0.0231174	0.0243164	0.0217553
188.8	0.0530925	0.0344921	0.0227359	0.0244013	0.0217727
189	0.0530002	0.0349022	0.0230208	0.0246228	0.0220663
189.2	0.0535074	0.035779	0.0232074	0.024594	0.0224867
189.4	0.052959	0.0359958	0.0227896	0.0245074	0.0224478
189.6	0.0528193	0.0360899	0.0229398	0.0247769	0.02253
189.8	0.0526592	0.0366612	0.0230179	0.0252532	0.0228598
190	0.0527487	0.0364775	0.0225467	0.0247358	0.0226291
190.2	0.0530472	0.0366195	0.022447	0.0246821	0.0224186
190.4	0.0530914	0.0370361	0.0224772	0.0242682	0.0220117
190.6	0.0531471	0.0373556	0.0225924	0.0238204	0.0217829
190.8	0.0538668	0.0380879	0.0229607	0.023874	0.0217349
191	0.0544897	0.0384248	0.023384	0.0242171	0.021892
191.2	0.0542784	0.0385033	0.0233996	0.0236998	0.0215299
191.4	0.0543417	0.0379702	0.0233424	0.0236453	0.0212173
191.6	0.054258	0.0376882	0.0234165	0.0235621	0.0208994
191.8	0.0536811	0.0371542	0.0228861	0.023267	0.0204309
192	0.0537527	0.0369587	0.0230281	0.0236603	0.0207524
192.2	0.0538373	0.036706	0.0228772	0.023686	0.0207882
192.4	0.0533028	0.0355677	0.0222908	0.0231441	0.0203381
192.6	0.0532169	0.0354671	0.0223361	0.0232179	0.020574
192.8	0.0531605	0.0351528	0.0221947	0.023294	0.0202584
193	0.053044	0.0346294	0.0218376	0.02309	0.0198495
193.2	0.0530928	0.0346994	0.0217778	0.0237205	0.0203339
193.4	0.0528768	0.0342031	0.021624	0.023977	0.0200579
193.6	0.0527048	0.033998	0.0218803	0.0240414	0.020488
193.8	0.0530108	0.033945	0.0216763	0.0240272	0.0204848
194	0.0535936	0.0341001	0.0215707	0.0239069	0.0206163
194.2	0.0539863	0.0349058	0.022103	0.0243666	0.020895
194.4	0.0539038	0.0358887	0.0220335	0.024513	0.0208725
194.6	0.05395	0.036295	0.0221303	0.024198	0.0206616
194.8	0.0545243	0.0364756	0.0220637	0.0239796	0.0202526
195	0.0545984	0.0365567	0.0222796	0.0244369	0.020051
195.2	0.0546517	0.036798	0.0227704	0.0240711	0.0196891
195.4	0.0547741	0.0364145	0.0229007	0.0245191	0.0198455
195.6	0.0550708	0.0368265	0.0233718	0.0244734	0.0199108
195.8	0.0548369	0.0367307	0.0230902	0.0240575	0.0198959
196	0.0551655	0.0370938	0.0237139	0.0241609	0.0200511
196.2	0.0549437	0.0373005	0.0235345	0.023901	0.0200891
196.4	0.0547177	0.0371765	0.0234888	0.0240199	0.0201035
196.6	0.054754	0.0371741	0.0235787	0.0237797	0.0206419
196.8	0.0548461	0.0370747	0.0238364	0.0240081	0.0205604
197	0.0543644	0.0367362	0.0232906	0.0236856	0.0205481
197.2	0.0541335	0.0370057	0.0238121	0.0241796	0.0210284
197.4	0.0540068	0.0367996	0.023601	0.0237793	0.0206009
197.6	0.0531624	0.0368224	0.0233967	0.023712	0.0208475
197.8	0.0534933	0.036979	0.0233077	0.0239058	0.0211118
198	0.0539151	0.0375644	0.0233328	0.0241355	0.0215675
198.2	0.0534844	0.0378989	0.0234872	0.0245852	0.0217966
198.4	0.0530309	0.0374779	0.0229851	0.0246127	0.0215954
198.6	0.0530211	0.0368745	0.0227813	0.02415	0.0211328
198.8	0.053264	0.0366281	0.022661	0.0241439	0.0206559
199	0.0533537	0.0363381	0.0222857	0.0240898	0.0205602
199.2	0.0536436	0.036259	0.0222432	0.0239399	0.0206129
199.4	0.0537899	0.0357334	0.0216966	0.0238319	0.0209216
199.6	0.0542719	0.0357447	0.0214278	0.023335	0.0207105
199.8	0.0542314	0.0358339	0.0210896	0.0232419	0.0206083
200	0.0542816	0.0359221	0.0207713	0.0232448	0.0202841
200.2	0.0549986	0.0364896	0.0209625	0.0238079	0.0211513
200.4	0.0551454	0.0363631	0.0210283	0.0238497	0.0216976
200.6	0.0552953	0.0366058	0.0210017	0.0238321	0.0218855
200.8	0.0551472	0.0363969	0.0207467	0.0237669	0.0211892
201	0.0547648	0.0361433	0.020568	0.0231434	0.0209889
201.2	0.0545205	0.0359498	0.0209568	0.0233189	0.0207797
201.4	0.054066	0.0358094	0.0208396	0.0231892	0.0206208
201.6	0.0535978	0.0362136	0.0214357	0.0237827	0.0208047
201.8	0.0540141	0.0369579	0.0220001	0.0238025	0.0209822
202	0.0542884	0.0375772	0.0227231	0.0241238	0.0214211
202.2	0.0545003	0.0377524	0.0233762	0.0245136	0.0216087
202.4	0.054509	0.0373483	0.0237724	0.0244799	0.0217225
202.6	0.0547589	0.0374784	0.0240467	0.0243719	0.0219602
202.8	0.0552621	0.0381032	0.0242855	0.0249659	0.0221559
203	0.0549311	0.0380645	0.0241955	0.0248507	0.0221901
203.2	0.0552935	0.0381583	0.0242992	0.0249933	0.0226529
203.4	0.0557569	0.0382497	0.0245488	0.0253314	0.023348
203.6	0.0559424	0.0379174	0.0242724	0.0250381	0.0231471
203.8	0.0558314	0.0383096	0.0240554	0.0251006	0.0231759
204	0.0558207	0.0382941	0.0237174	0.0249472	0.0232459
204.2	0.0561386	0.0385072	0.0240516	0.0255358	0.0236868
204.4	0.0557912	0.0375434	0.023334	0.0251293	0.0232002
204.6	0.0555438	0.0369645	0.0226546	0.0242562	0.0220404
204.8	0.0554157	0.036578	0.0224384	0.0239112	0.0215073
205	0.0556604	0.0365049	0.0224743	0.0238683	0.0216208
205.2	0.0555296	0.0360944	0.0218786	0.0241562	0.021117
205.4	0.0551716	0.0359387	0.0218124	0.0241861	0.0206627
205.6	0.0549923	0.0361968	0.0220589	0.0245654	0.0204332
205.8	0.0551782	0.0363406	0.0223078	0.024264	0.0202027
206	0.0551933	0.0361795	0.0222675	0.0244461	0.0204534
206.2	0.0555144	0.0364529	0.0225455	0.0244829	0.0204888
206.4	0.0554158	0.0369099	0.023039	0.0250453	0.0207948
206.6	0.0555977	0.0371121	0.0230117	0.0251298	0.0210391
206.8	0.0557149	0.0378228	0.0230997	0.0256962	0.0209429
207	0.0551439	0.0375462	0.0231005	0.0251736	0.0207764
207.2	0.0554823	0.0377031	0.0231166	0.0253139	0.0211721
207.4	0.0557448	0.0381348	0.0232851	0.0254579	0.0217516
207.6	0.0556891	0.0384573	0.0233249	0.0254196	0.0216536
207.8	0.0558342	0.0392649	0.0238636	0.0257365	0.0224193
208	0.0561445	0.0396259	0.0242168	0.0258435	0.0226992
208.2	0.0563394	0.0396823	0.0240532	0.0258312	0.0229036
208.4	0.0561719	0.0389649	0.0237757	0.0251997	0.0220519
208.6	0.056034	0.0393363	0.023749	0.0248495	0.0219117
208.8	0.0563536	0.0395509	0.0238738	0.0252472	0.0221609
209	0.0563407	0.0393263	0.0235696	0.0253939	0.0222362
209.2	0.0556994	0.0389069	0.0233787	0.0253735	0.0219385
209.4	0.0556332	0.0387296	0.0235498	0.0253369	0.0219605
209.6	0.0552616	0.038773	0.0237752	0.0253279	0.0219011
209.8	0.0547375	0.0385916	0.0234455	0.0245818	0.0215225
210	0.0541987	0.0380514	0.0231763	0.0241561	0.021394
210.2	0.0544031	0.0383068	0.0236092	0.0244497	0.0214073
210.4	0.0545285	0.0383514	0.0236381	0.024742	0.0215456
210.6	0.0545121	0.0379456	0.0233465	0.0247394	0.0213711
210.8	0.0547099	0.038086	0.0235553	0.0249602	0.0213686
211	0.0546848	0.037394	0.0231042	0.0247059	0.0214754
211.2	0.0551303	0.0375276	0.0230656	0.0252742	0.021911
211.4	0.0550557	0.0372353	0.0227317	0.0252626	0.0218729
211.6	0.0551444	0.0377146	0.023353	0.0258255	0.0222698
211.8	0.0550226	0.037814	0.0230001	0.0254808	0.02237
212	0.0552288	0.0376849	0.0228901	0.0254671	0.0220697
212.2	0.0552762	0.0374564	0.0225774	0.0254778	0.0220608
212.4	0.0548758	0.0368703	0.0224657	0.025164	0.0212804
212.6	0.0548133	0.0371425	0.0226676	0.0255305	0.0219574
212.8	0.0547366	0.0371977	0.0229817	0.0253687	0.0219333
213	0.0549758	0.0375331	0.0235088	0.0257267	0.0223728
213.2	0.0544768	0.0372009	0.023208	0.0253874	0.0221255
213.4	0.0548383	0.0372479	0.0231239	0.0253217	0.0219878
213.6	0.0544935	0.0370515	0.0232634	0.0251722	0.0217917
213.8	0.0545466	0.0371046	0.0233492	0.0253274	0.0216874
214	0.0547694	0.0372221	0.0239791	0.0257677	0.0217028
214.2	0.0552067	0.0376891	0.0242644	0.0260544	0.0217392
214.4	0.0558132	0.0382829	0.024279	0.026354	0.0222415
214.6	0.0552748	0.0379089	0.0239254	0.0261422	0.0222689
214.8	0.0554312	0.0378965	0.0238056	0.0259003	0.0225348
215	0.055609	0.038025	0.0235178	0.0259231	0.0226864
215.2	0.0560184	0.0379748	0.0233001	0.0260081	0.0226889
215.4	0.0555961	0.0375856	0.022909	0.0254506	0.0222582
215.6	0.0554764	0.0382491	0.023124	0.0256867	0.0222928
215.8	0.0553307	0.0382048	0.0224389	0.0253909	0.0220542
216	0.0557442	0.0387373	0.0229462	0.0263838	0.0225447
216.2	0.0557953	0.0387281	0.023058	0.0263542	0.0227922
216.4	0.0549196	0.0382988	0.0227987	0.0256844	0.0226598
216.6	0.0548611	0.0383206	0.0232275	0.025948	0.02291
216.8	0.0554605	0.0391737	0.0236897	0.0265858	0.0231578
217	0.0556647	0.0392615	0.0242032	0.0268852	0.0232061
217.2	0.0555374	0.0387493	0.0237957	0.0266708	0.0227815
217.4	0.0560053	0.0390021	0.0243431	0.0268822	0.022806
217.6	0.056194	0.0394263	0.0247772	0.0273314	0.0227408
217.8	0.0563681	0.0396384	0.0249102	0.027617	0.0227977
218	0.0562644	0.0396302	0.0252079	0.0275262	0.0226187
218.2	0.0564597	0.0396803	0.0250547	0.0272718	0.022714
218.4	0.0569988	0.0403151	0.0254968	0.0274635	0.023392
218.6	0.056156	0.0401391	0.0253553	0.0271779	0.0233793
218.8	0.0564983	0.0403669	0.0252995	0.0271627	0.0233323
219	0.0565456	0.0407028	0.0252233	0.0269176	0.0236122
219.2	0.0565711	0.0399132	0.0248186	0.0266463	0.0231995
219.4	0.0565429	0.0398886	0.0249675	0.0265698	0.0233599
219.6	0.0563563	0.0405356	0.0246808	0.0265732	0.0235012
219.8	0.0562614	0.0405261	0.0246562	0.0263148	0.024012
220	0.0562231	0.0407218	0.0248958	0.0265064	0.0242643
220.2	0.0555888	0.0394497	0.0243077	0.0254259	0.0238138
220.4	0.0548905	0.0392153	0.0239443	0.0247871	0.0237486
220.6	0.0554829	0.039147	0.0240396	0.0247496	0.0241267
220.8	0.0563257	0.0395032	0.0240025	0.0249575	0.0244264
221	0.0559266	0.0389007	0.0236624	0.0241642	0.0240361
221.2	0.0565	0.0386235	0.0231716	0.0241952	0.0237631
221.4	0.0565126	0.0388886	0.0232818	0.0245339	0.0233174
221.6	0.0565885	0.0390992	0.0234579	0.0247677	0.0236478
221.8	0.0569597	0.0392891	0.023553	0.025218	0.0238375
222	0.0573116	0.0396862	0.0240289	0.0253182	0.0235977
222.2	0.057412	0.0397773	0.0241722	0.0254339	0.0237936
222.4	0.0579262	0.0408254	0.0250157	0.0262467	0.0243958
222.6	0.0576161	0.0405632	0.0247116	0.0261531	0.0241456
222.8	0.0574257	0.040689	0.0246889	0.0263125	0.0243144
223	0.0576805	0.0402918	0.0247369	0.0263724	0.0241727
223.2	0.0579533	0.0400342	0.0253912	0.02709	0.0241513
223.4	0.0583311	0.0407217	0.0261179	0.0278363	0.0246066
223.6	0.0578727	0.0409435	0.0260958	0.0278849	0.0246075
223.8	0.0579765	0.0407703	0.0262778	0.028003	0.0244964
224	0.0575146	0.0403008	0.0257581	0.0277409	0.0240833
224.2	0.0567271	0.0395819	0.0251571	0.0269159	0.0236212
224.4	0.056563	0.0396806	0.0252665	0.0268896	0.0239886
224.6	0.0567617	0.0389483	0.0248923	0.026908	0.0236674
224.8	0.0567398	0.0387129	0.0245049	0.0266639	0.0233343
225	0.0563781	0.0385918	0.0244183	0.0267155	0.0230698
225.2	0.0565281	0.038464	0.0245426	0.0269004	0.0228112
225.4	0.0558948	0.0383878	0.0243364	0.0264416	0.0228813
225.6	0.0564635	0.0386297	0.0244333	0.0263571	0.0233295
225.8	0.0564302	0.0386071	0.0240368	0.0261916	0.0226927
226	0.0564327	0.0382379	0.0237116	0.0255428	0.0223002
226.2	0.0567469	0.0380619	0.0239139	0.0255067	0.0223608
226.4	0.0574143	0.0386905	0.0240765	0.0256279	0.0225699
226.6	0.0573781	0.038181	0.0240074	0.0252904	0.0223478
226.8	0.0578309	0.0384961	0.0244061	0.0256595	0.0228972
227	0.058228	0.0381963	0.0244946	0.0255366	0.0229424
227.2	0.0584633	0.0389526	0.0249447	0.0260673	0.0232999
227.4	0.0586859	0.0394743	0.0252101	0.0261673	0.0232948
227.6	0.0579708	0.0393807	0.0246997	0.0258577	0.0231942
227.8	0.0582285	0.0397934	0.025117	0.025978	0.0234113
228	0.0580453	0.0397194	0.0248601	0.025304	0.0238439
228.2	0.0582524	0.040189	0.0255238	0.0258324	0.0240747
228.4	0.0580573	0.0404412	0.0260631	0.0264389	0.0240497
228.6	0.0584334	0.0406518	0.0264445	0.0270216	0.0242526
228.8	0.0584181	0.0411618	0.0267133	0.027367	0.024858
229	0.0586315	0.0415145	0.0269511	0.0278374	0.0254723
229.2	0.0583691	0.0415652	0.0268278	0.0282047	0.0257921
229.4	0.0583493	0.0413309	0.02656	0.0284986	0.0260014
229.6	0.0586959	0.04141	0.0270494	0.0294245	0.0260941
229.8	0.0582877	0.0412053	0.0268	0.0292603	0.0256428
230	0.0584132	0.0413026	0.026696	0.0294217	0.025623
230.2	0.0583869	0.0412063	0.0267975	0.0294943	0.0253937
230.4	0.0578366	0.0410989	0.0264097	0.0293025	0.025407
230.6	0.0577211	0.0407929	0.0261425	0.0293993	0.0253031
230.8	0.057532	0.0402968	0.0258221	0.0288484	0.0249092
231	0.0570179	0.0400553	0.025099	0.0284394	0.02468
231.2	0.0568782	0.0396812	0.0246168	0.0278877	0.0239923
231.4	0.0565564	0.0393944	0.0245684	0.0274981	0.0238143
231.6	0.0562937	0.0394523	0.0245564	0.0269612	0.0238967
231.8	0.0567718	0.0393544	0.0247832	0.0268134	0.0240438
232	0.057259	0.0397051	0.0247023	0.0262376	0.024291
232.2	0.0575392	0.0402188	0.0248766	0.0267698	0.0242681
232.4	0.0574827	0.0403529	0.0247601	0.0268125	0.0242586
232.6	0.0584275	0.0405848	0.0249291	0.0272296	0.0248176
232.8	0.0588101	0.0403767	0.0246883	0.0271928	0.0251986
233	0.0598834	0.0405524	0.0252095	0.0273618	0.0258398
233.2	0.0599024	0.0406232	0.025502	0.0277669	0.0259407
233.4	0.0602748	0.0407244	0.026056	0.0280468	0.0261992
233.6	0.0602767	0.0410888	0.0263691	0.0283467	0.0264464
233.8	0.0605837	0.0411966	0.0263827	0.0283335	0.0266116
234	0.0602375	0.0406448	0.026261	0.028469	0.0263649
234.2	0.0598347	0.040174	0.0262984	0.0282947	0.0260082
234.4	0.0594495	0.0400517	0.0265783	0.0279366	0.0257984
234.6	0.0595714	0.0398248	0.0267427	0.0283793	0.0253965
234.8	0.0590119	0.0395724	0.0267047	0.0283841	0.0247913
235	0.0588104	0.0395667	0.0264712	0.0282394	0.0248031
235.2	0.0584362	0.0394248	0.0267694	0.0281447	0.0244498
235.4	0.0582382	0.0399263	0.0270865	0.0284233	0.024625
235.6	0.0581725	0.0401981	0.0271032	0.0285656	0.0245268
235.8	0.0582452	0.0401379	0.0266894	0.0288217	0.0243429
236	0.058606	0.0408493	0.0269341	0.0289203	0.0244974
236.2	0.0585898	0.0407893	0.0264356	0.0288795	0.0245267
236.4	0.0583638	0.0409898	0.0263944	0.0289419	0.0246818
236.6	0.0585605	0.0409462	0.0264108	0.0285839	0.0247835
236.8	0.0587716	0.0411812	0.0267432	0.0286208	0.0253747
237	0.0586698	0.0412781	0.0268495	0.0285622	0.0254918
237.2	0.0576149	0.0409682	0.0263187	0.0280175	0.0249605
237.4	0.0572194	0.0405686	0.0258102	0.0274411	0.0249003
237.6	0.0569899	0.0404252	0.0256788	0.0273883	0.0249975
237.8	0.0568036	0.0397742	0.025317	0.0271955	0.0248836
238	0.0560922	0.0390753	0.0249699	0.0265589	0.0242176
238.2	0.0556927	0.0385959	0.0247352	0.0257939	0.023726
238.4	0.0555275	0.0379922	0.0248463	0.0251005	0.0234172
238.6	0.055591	0.037702	0.0245007	0.0251662	0.0234893
238.8	0.0551198	0.0376489	0.0243636	0.0248966	0.0231541
239	0.0551576	0.0377442	0.0247588	0.0248863	0.0231437
239.2	0.0554026	0.0381895	0.0252859	0.025418	0.0234291
239.4	0.0555557	0.0384168	0.0254425	0.0262753	0.0236776
239.6	0.0558185	0.0382198	0.0253338	0.0267158	0.0237124
239.8	0.0561917	0.0383852	0.0253811	0.0267463	0.0237204
240	0.0566928	0.0390626	0.0259792	0.0275558	0.0241398
240.2	0.0569093	0.0393688	0.0263631	0.0279981	0.0247002
240.4	0.0565374	0.0396974	0.0265345	0.0279913	0.0244479
240.6	0.056959	0.0400511	0.0269708	0.0283554	0.0244633
240.8	0.0567987	0.0402031	0.0266857	0.0284786	0.0241729
241	0.0568198	0.0404605	0.0262712	0.0286314	0.0237944
241.2	0.057222	0.0407821	0.0261952	0.0286598	0.0239636
241.4	0.0572196	0.0410426	0.0257786	0.0285449	0.0238824
241.6	0.0579291	0.0418195	0.0261052	0.0293406	0.0243377
241.8	0.0575115	0.0411848	0.0250873	0.028506	0.0239062
242	0.0572935	0.0408298	0.0252113	0.0282116	0.0240844
242.2	0.058037	0.0407488	0.0250908	0.0280711	0.0242731
242.4	0.0582915	0.0406687	0.0255218	0.0278386	0.0246586
242.6	0.0583353	0.0411055	0.0255227	0.0276676	0.0250564
242.8	0.0582844	0.0408186	0.0253504	0.0274677	0.024718
243	0.0590123	0.0410227	0.0258842	0.0277791	0.0251203
243.2	0.0591098	0.0410635	0.0257499	0.0275673	0.0254512
243.4	0.0589539	0.0410904	0.0263087	0.0278276	0.0256974
243.6	0.059151	0.0409147	0.0260219	0.0271545	0.0256408
243.8	0.0591846	0.0410611	0.0261695	0.0270051	0.0258952
244	0.059189	0.0412485	0.0263469	0.0271608	0.0259304
244.2	0.0588634	0.0410679	0.0265238	0.0268431	0.0256425
244.4	0.0581761	0.0410163	0.0263936	0.0266557	0.024806
244.6	0.0586417	0.0413147	0.0263965	0.0269852	0.0247823
244.8	0.0585536	0.041499	0.0257093	0.0272503	0.0246909
245	0.0588788	0.0418444	0.0262064	0.0281522	0.0251874
245.2	0.0592386	0.0420688	0.0267147	0.0287519	0.0257598
245.4	0.0591141	0.0426342	0.0268123	0.0290203	0.0254719
245.6	0.0593477	0.042944	0.0272896	0.0299843	0.0261574
245.8	0.0589504	0.0420913	0.026998	0.0292906	0.0260607
246	0.0592741	0.0423813	0.0276207	0.0300695	0.0266594
246.2	0.0601546	0.0427177	0.0276306	0.0297004	0.026591
246.4	0.0599326	0.0426695	0.0278176	0.0295383	0.0265826
246.6	0.059582	0.0422854	0.0273086	0.0290774	0.0261194
246.8	0.0599817	0.0420407	0.0275359	0.0290426	0.0259933
247	0.059939	0.0421739	0.0277259	0.0289837	0.025677
247.2	0.0591353	0.0416914	0.0274599	0.0283679	0.0250172
247.4	0.0589931	0.0416195	0.027814	0.0282229	0.0248303
247.6	0.0584013	0.0409957	0.0272749	0.02763	0.0240691
247.8	0.0583761	0.0406704	0.0275759	0.0275524	0.0242474
248	0.0579096	0.0402607	0.0272785	0.0271571	0.0235148
248.2	0.0576738	0.040191	0.0274679	0.0271305	0.0236038
248.4	0.0572391	0.0402326	0.0273715	0.0273502	0.0233347
248.6	0.0574028	0.040555	0.027288	0.0278528	0.0236554
248.8	0.0573907	0.0410489	0.0273364	0.0285131	0.0241686
249	0.0574231	0.0411872	0.0277719	0.0287026	0.0243084
249.2	0.0579951	0.0418752	0.0277622	0.029173	0.0246498
249.4	0.0578065	0.0421307	0.0273121	0.0287225	0.0247379
249.6	0.0578144	0.042152	0.027309	0.0289692	0.0251877
249.8	0.0577261	0.0421173	0.0268442	0.0285436	0.0252548
250	0.0580454	0.0425724	0.0267852	0.0286967	0.0257029
250.2	0.058554	0.0426462	0.0264151	0.028584	0.0258755
250.4	0.058444	0.0426377	0.0262341	0.0286193	0.0258407
250.6	0.0582766	0.0420456	0.0260127	0.0281485	0.025783
250.8	0.058876	0.0423039	0.0260254	0.0279603	0.0264248
251	0.0582257	0.0416339	0.0250047	0.0273192	0.0254713
251.2	0.0583807	0.0410646	0.0250104	0.0268122	0.0253373
251.4	0.0582804	0.0410483	0.0250241	0.0268339	0.0254335
251.6	0.0579821	0.0409671	0.0251395	0.0266517	0.0255033
251.8	0.058169	0.0408219	0.0251814	0.0267545	0.0259962
252	0.0578107	0.0410364	0.0249274	0.0268097	0.0258461
252.2	0.0579418	0.0412103	0.0251336	0.0267593	0.0262934
252.4	0.0578885	0.0414706	0.025444	0.026907	0.0259043
252.6	0.0581432	0.0416528	0.0258045	0.0269769	0.0262583
252.8	0.0585067	0.0420874	0.026211	0.0270506	0.0265183
253	0.0585804	0.0419399	0.026331	0.0269507	0.0262191
253.2	0.0588533	0.0421318	0.0264377	0.0271603	0.0266458
253.4	0.0586432	0.0416944	0.0267967	0.0270234	0.0266309
253.6	0.0586621	0.0417525	0.0272877	0.0274679	0.0264736
253.8	0.0588454	0.0417852	0.0272899	0.028011	0.0265047
254	0.0601075	0.0423058	0.0279037	0.0288123	0.0271192
254.2	0.061115	0.0427882	0.0285134	0.0296291	0.0270489
254.4	0.0612836	0.0428526	0.0289984	0.0295879	0.0268269
254.6	0.0617325	0.0426404	0.0287826	0.0295469	0.0270319
254.8	0.0620411	0.0430792	0.0285249	0.0299177	0.0273172
255	0.0616958	0.0427102	0.0283018	0.0297046	0.026966
255.2	0.0621334	0.0426648	0.0281279	0.0298086	0.0272546
255.4	0.0618091	0.0428092	0.0276629	0.029773	0.0271991
255.6	0.0614071	0.0429414	0.0274795	0.0294762	0.027408
255.8	0.0611886	0.0430285	0.027129	0.0295446	0.0274088
256	0.0607707	0.0426951	0.0267493	0.0290901	0.0271913
256.2	0.0605492	0.0425508	0.0267096	0.0286481	0.0274838
256.4	0.0601771	0.0423265	0.0266371	0.0281464	0.0270189
256.6	0.0599231	0.0424487	0.0265299	0.0280538	0.0274404
256.8	0.0594848	0.0423368	0.0262813	0.0274915	0.0269886
257	0.0590811	0.0420386	0.0258377	0.0270663	0.0264049
257.2	0.0591408	0.0423678	0.0258121	0.027277	0.0263768
257.4	0.0588765	0.0419448	0.0257187	0.0274142	0.0258325
257.6	0.0587622	0.0423031	0.0258885	0.0273682	0.0254803
257.8	0.0593578	0.0425361	0.0261438	0.0279629	0.025165
258	0.0601851	0.0432484	0.0271777	0.0287851	0.0252211
258.2	0.0606314	0.0433543	0.0277339	0.0292478	0.0250048
258.4	0.0608776	0.0433911	0.0282844	0.0295414	0.0253684
258.6	0.0612102	0.0435767	0.0281622	0.0296325	0.0255896
258.8	0.0618157	0.0437708	0.0286708	0.0301914	0.0261967
259	0.0615861	0.043112	0.0283569	0.0293788	0.0257306
259.2	0.0617507	0.042916	0.0285392	0.0295732	0.025908
259.4	0.0619812	0.0431179	0.0288358	0.0299744	0.0265181
259.6	0.0617635	0.0432614	0.0295296	0.0301384	0.0270633
259.8	0.061512	0.0433161	0.0295086	0.030008	0.0270581
260	0.0606321	0.0431523	0.0294762	0.0295907	0.0270978
260.2	0.0605696	0.0434935	0.0293672	0.0292964	0.0274923
260.4	0.0602261	0.0430347	0.0290537	0.0285391	0.0271015
260.6	0.059772	0.0430978	0.0285096	0.0278835	0.0273307
260.8	0.059177	0.042564	0.0277801	0.0269223	0.0270121
261	0.0590842	0.0426081	0.0274431	0.0273481	0.0271807
261.2	0.0586372	0.0425439	0.0273035	0.0273588	0.0272499
261.4	0.0586842	0.0427037	0.0275923	0.027185	0.0273655
261.6	0.0590528	0.0430097	0.0281517	0.027357	0.0277019
261.8	0.0595323	0.0431356	0.0284764	0.0279532	0.0276323
262	0.0598378	0.0431098	0.0286954	0.0282819	0.0275927
262.2	0.060404	0.0435253	0.0290065	0.0286127	0.0280066
262.4	0.0612201	0.0444227	0.0296832	0.0291492	0.0283171
262.6	0.0615459	0.0444254	0.0294889	0.0291087	0.0285109
262.8	0.0616721	0.0441147	0.0291328	0.0291933	0.0283544
263	0.0613609	0.0441434	0.0289938	0.02919	0.0281007
263.2	0.0617496	0.0444602	0.0291912	0.0301276	0.0284481
263.4	0.0619568	0.0447858	0.0293626	0.0309062	0.0287696
263.6	0.0616077	0.044852	0.0293933	0.0304769	0.0284911
263.8	0.0608985	0.0448091	0.028604	0.0298695	0.0278016
264	0.0601982	0.0445197	0.0278743	0.0295301	0.0274888
264.2	0.0602242	0.0441079	0.0275936	0.0293607	0.0274346
264.4	0.0596914	0.0437199	0.0273948	0.0291725	0.0269452
264.6	0.0592507	0.0435591	0.0269916	0.0289799	0.0268596
264.8	0.0586342	0.0430726	0.0265813	0.0289952	0.0264439
265	0.0587465	0.0427918	0.0262357	0.0290262	0.0262674
265.2	0.0588237	0.043109	0.0268444	0.0290151	0.0263631
265.4	0.0597857	0.0435536	0.0276086	0.0291928	0.0267562
265.6	0.0595408	0.0427842	0.0279412	0.0295762	0.0266987
265.8	0.0591378	0.0424199	0.0277798	0.0290296	0.0261793
266	0.0590042	0.0422657	0.0276853	0.02904	0.0260782
266.2	0.0597482	0.0428861	0.0283232	0.0294552	0.0266316
266.4	0.0598976	0.0428668	0.0285793	0.0294094	0.0265284
266.6	0.0601758	0.0425719	0.0285687	0.0291397	0.0269172
266.8	0.0600331	0.0423926	0.028192	0.0292554	0.0266368
267	0.0603455	0.0423985	0.0283689	0.0293657	0.0266707
267.2	0.0600923	0.0423503	0.0281851	0.0293174	0.0266278
267.4	0.0601632	0.042412	0.0282449	0.0291502	0.02686
267.6	0.0604515	0.0424935	0.0280133	0.0286582	0.0270124
267.8	0.0605905	0.0423762	0.028167	0.0284532	0.0269331
268	0.0609401	0.0421984	0.0285051	0.0285944	0.0270323
268.2	0.061705	0.0427506	0.0289256	0.0284836	0.0269778
268.4	0.0618047	0.0426116	0.0288688	0.0280955	0.0264448
268.6	0.0618829	0.0421963	0.0286754	0.0274863	0.0261814
268.8	0.0616435	0.0420864	0.028291	0.0271755	0.0258221
269	0.061624	0.0421221	0.0280217	0.0269529	0.0259276
269.2	0.0619422	0.0428093	0.0288686	0.0272834	0.0266654
269.4	0.0618061	0.0425124	0.0290532	0.0275291	0.0270641
269.6	0.0611434	0.0418849	0.0291217	0.0275213	0.0270268
269.8	0.060745	0.0420284	0.028951	0.0272167	0.0270598
270	0.0607698	0.0425065	0.0294801	0.0281183	0.0277632
270.2	0.0609806	0.0423839	0.0294449	0.028537	0.027604
270.4	0.0602721	0.0420024	0.0292444	0.0281942	0.0272179
270.6	0.0608952	0.0426318	0.0296526	0.0289392	0.0278977
270.8	0.0608712	0.0425223	0.029411	0.0297273	0.0279258
271	0.0611569	0.0425119	0.0291619	0.0296024	0.0278024
271.2	0.0607661	0.0428779	0.0291834	0.0296852	0.0279979
271.4	0.0617022	0.0431644	0.0295362	0.0302349	0.0284586
271.6	0.0621599	0.0434988	0.0300394	0.0305869	0.0288704
271.8	0.0627181	0.0431847	0.0303704	0.0301784	0.0286189
272	0.0632728	0.0429774	0.0305233	0.0299075	0.0283125
272.2	0.0638914	0.0429858	0.0306668	0.0299806	0.028323
272.4	0.063318	0.0424058	0.0305877	0.0299445	0.0280542
272.6	0.063235	0.0425116	0.0306078	0.0299663	0.0278347
272.8	0.0626122	0.0425383	0.0304153	0.0300233	0.0273346
273	0.0623534	0.0427936	0.0306203	0.0303164	0.0275186
273.2	0.0624319	0.0429901	0.0310039	0.0309265	0.0277198
273.4	0.0615326	0.0425026	0.0307747	0.031179	0.0275879
273.6	0.0608581	0.0420784	0.0307362	0.0306567	0.0273116
273.8	0.0604525	0.0420655	0.0306278	0.0306377	0.0270849
274	0.0600841	0.0422162	0.0305575	0.0305055	0.0267053
274.2	0.0597254	0.0416854	0.029946	0.0303257	0.0261615
274.4	0.0592277	0.0415117	0.0298268	0.0299576	0.0263513
274.6	0.0596743	0.0418841	0.0297851	0.0301024	0.0268945
274.8	0.0596141	0.0413393	0.0289947	0.0296964	0.0265235
275	0.0595758	0.041285	0.0283631	0.0291861	0.0260964
275.2	0.0596368	0.0423081	0.0286954	0.0295635	0.0265792
275.4	0.0601802	0.0425061	0.0289347	0.0299712	0.0273743
275.6	0.0605837	0.0430166	0.0289355	0.030135	0.0277894
275.8	0.0612798	0.0430965	0.0288425	0.0296902	0.0276196
276	0.061956	0.043252	0.0288909	0.0297154	0.0278982
276.2	0.0622956	0.0432742	0.0290023	0.0301473	0.0281894
276.4	0.0621644	0.0434529	0.0289101	0.0302055	0.0280066
276.6	0.0625816	0.0440035	0.0293009	0.0303717	0.0280285
276.8	0.0622152	0.0439069	0.0288294	0.0301626	0.0274232
277	0.0624009	0.0441567	0.0288747	0.030229	0.0275597
277.2	0.0622978	0.0438602	0.0287633	0.0301359	0.0272449
277.4	0.0621894	0.0438326	0.0291429	0.0301994	0.0272675
277.6	0.0624046	0.0433538	0.0294135	0.0296868	0.0272704
277.8	0.0624738	0.0429106	0.0292365	0.0297582	0.0265172
278	0.0621018	0.0425721	0.0292535	0.0294611	0.0261206
278.2	0.0623285	0.0424519	0.0292224	0.0297214	0.0264043
278.4	0.0623963	0.0423554	0.0292838	0.0296475	0.0266538
278.6	0.0627061	0.0424433	0.0289836	0.0295038	0.0265277
278.8	0.0628582	0.0426471	0.0291838	0.0300448	0.0267583
279	0.0630942	0.0433359	0.0293853	0.0307268	0.0270685
279.2	0.0629797	0.0437752	0.0295656	0.0312577	0.0274784
279.4	0.0632076	0.043788	0.0296534	0.0318078	0.0280694
279.6	0.0633898	0.0442697	0.0294831	0.0320693	0.028153
279.8	0.0639067	0.0447496	0.029372	0.031864	0.0280745
280	0.0641318	0.0447647	0.0293239	0.0320819	0.028706
280.2	0.0640544	0.0447751	0.0293596	0.0321078	0.0287416
280.4	0.0635986	0.0447614	0.0292239	0.0315516	0.0283577
280.6	0.0632507	0.0453721	0.0291883	0.0307767	0.0282181
280.8	0.0627945	0.0453277	0.0289671	0.030367	0.0279346
281	0.0628509	0.0455865	0.029251	0.0300316	0.0282183
281.2	0.062504	0.0456446	0.029212	0.0294684	0.0277635
281.4	0.0619513	0.0455179	0.0292707	0.029135	0.0277667
281.6	0.0615767	0.0449109	0.0288399	0.0284313	0.027469
281.8	0.061289	0.0449104	0.0291112	0.0287981	0.0271728
282	0.0613089	0.045139	0.0295723	0.028551	0.0276306
282.2	0.0617868	0.0456791	0.0298959	0.0291647	0.0280921
282.4	0.0614346	0.0456879	0.0299709	0.0292395	0.0284707
282.6	0.0618903	0.045817	0.0304736	0.0301246	0.0287783
282.8	0.0623194	0.0459864	0.0310993	0.0305757	0.0293671
283	0.0624001	0.0458754	0.03131	0.0307423	0.0293981
283.2	0.0623934	0.0457311	0.0313452	0.0314777	0.029384
283.4	0.0633245	0.0462051	0.0317622	0.0320667	0.0300365
283.6	0.0637395	0.0466858	0.0320768	0.0328089	0.0301427
283.8	0.0644976	0.0467218	0.0323119	0.0331625	0.0305163
284	0.0643135	0.0466869	0.0323225	0.0331708	0.0306942
284.2	0.0644576	0.0462319	0.0320513	0.0330595	0.0305263
284.4	0.0639672	0.0460021	0.0318369	0.0326593	0.0303842
284.6	0.0641938	0.0464189	0.032226	0.0327719	0.0303165
284.8	0.0637686	0.0458629	0.0316659	0.0327684	0.0298149
285	0.0634729	0.0454466	0.0305868	0.0322946	0.0292716
285.2	0.0631722	0.0451901	0.0300009	0.0318387	0.0288403
285.4	0.0627568	0.0446702	0.0296816	0.0313998	0.0289754
285.6	0.0627132	0.0444731	0.0296638	0.0314863	0.0290605
285.8	0.0628769	0.0445142	0.0298104	0.0318036	0.029147
286	0.0626661	0.0442476	0.0294727	0.0313353	0.0288347
286.2	0.0626251	0.044133	0.0295776	0.0317489	0.0290658
286.4	0.0622391	0.0437299	0.029616	0.0312856	0.0292219
286.6	0.0628209	0.043478	0.0298074	0.0314548	0.0290994
286.8	0.063246	0.0434022	0.0297877	0.0313315	0.0290557
287	0.0635585	0.0433205	0.0302038	0.0318001	0.0288084
287.2	0.0636666	0.0436386	0.0299709	0.0322569	0.0282925
287.4	0.0640967	0.0442603	0.0306089	0.0324562	0.0283922
287.6	0.0637838	0.0443458	0.0306002	0.0326239	0.028034
287.8	0.0635517	0.0437228	0.0305645	0.0322798	0.0278339
288	0.0632151	0.0443757	0.0308039	0.0323479	0.0280465
288.2	0.063251	0.0440302	0.0307701	0.032383	0.0283833
288.4	0.0626369	0.0443588	0.0309502	0.0320532	0.0283274
288.6	0.0625715	0.0443836	0.03099	0.0322218	0.0283753
288.8	0.0621229	0.0444149	0.0301193	0.0320551	0.0284922
289	0.0621587	0.044764	0.0299216	0.0318891	0.0288124
289.2	0.0621346	0.0453304	0.0300309	0.0316504	0.0290281
289.4	0.0616843	0.0449183	0.0298812	0.0310743	0.0287556
289.6	0.0619657	0.0452015	0.0303181	0.0311367	0.028827
289.8	0.062126	0.0454355	0.0300965	0.0310199	0.0284157
290	0.0618924	0.0452985	0.0300362	0.0307792	0.0285847
290.2	0.0622578	0.0455666	0.0306039	0.0310944	0.02892
290.4	0.0626542	0.0456601	0.0303483	0.0307506	0.0290146
290.6	0.0627825	0.045591	0.0299009	0.0309835	0.0286173
290.8	0.0630415	0.0451099	0.0299943	0.0313901	0.0283847
291	0.0632942	0.0450212	0.0304065	0.0318433	0.0281122
291.2	0.0632734	0.0450157	0.0301351	0.031419	0.0276914
291.4	0.063398	0.0446886	0.0304027	0.0312913	0.0276823
291.6	0.0631097	0.0442756	0.0301372	0.0307222	0.0270562
291.8	0.0631322	0.0441946	0.0304575	0.0303014	0.0273388
292	0.0629127	0.0445538	0.030618	0.0304128	0.0276735
292.2	0.0630639	0.0442695	0.0308048	0.0302458	0.0281891
292.4	0.0627696	0.0443168	0.030831	0.0299757	0.0282441
292.6	0.0627036	0.0439548	0.0308001	0.0298504	0.0285609
292.8	0.0626853	0.0438162	0.0305009	0.02959	0.0287664
293	0.062884	0.0441049	0.0307841	0.0294483	0.0289813
293.2	0.0628678	0.0437533	0.030668	0.0295145	0.0287812
293.4	0.0626457	0.0433404	0.030547	0.0292816	0.0284847
293.6	0.0629205	0.0436862	0.0305549	0.0294255	0.0283727
293.8	0.0628578	0.0440729	0.0304073	0.0297173	0.0286619
294	0.0625208	0.044247	0.0302278	0.0294627	0.0286994
294.2	0.0624624	0.044756	0.0302572	0.0295726	0.0286132
294.4	0.0625388	0.0444641	0.0299297	0.0293359	0.0287921
294.6	0.062375	0.0445028	0.0298631	0.0294292	0.0286847
294.8	0.0626141	0.0448253	0.0300309	0.0295255	0.0288224
295	0.0627799	0.0454943	0.0301584	0.0295062	0.029157
295.2	0.0628158	0.0458837	0.0302149	0.0292436	0.0292657
295.4	0.062906	0.0460726	0.030615	0.0294175	0.0296769
295.6	0.0622838	0.0459708	0.0308008	0.0288912	0.0292113
295.8	0.0622692	0.0464376	0.0311046	0.0293083	0.029652
296	0.0621108	0.0460841	0.0309622	0.029664	0.02933
296.2	0.0623235	0.046322	0.0310124	0.0297528	0.0296877
296.4	0.0619102	0.0459861	0.0306744	0.0294579	0.029302
296.6	0.0622222	0.0460602	0.0309746	0.0298562	0.029621
296.8	0.0621323	0.0459535	0.0306036	0.0301324	0.0296773
297	0.0624895	0.046257	0.0307675	0.0308138	0.0297797
297.2	0.0621924	0.0458061	0.0304167	0.031075	0.0294838
297.4	0.0622973	0.0458256	0.0302719	0.031169	0.0293045
297.6	0.0621914	0.0456911	0.0301194	0.0314721	0.0291535
297.8	0.0621616	0.0458742	0.0300325	0.0313849	0.0293026
298	0.0620484	0.0453099	0.0295829	0.0309188	0.0287059
298.2	0.0619743	0.045479	0.0293889	0.0309005	0.0286725
298.4	0.0623151	0.0452225	0.029538	0.0311353	0.0291184
298.6	0.0623447	0.0454962	0.0291081	0.0308414	0.0289894
298.8	0.0623958	0.045867	0.0292332	0.030655	0.0290646
299	0.0625652	0.0455819	0.0294542	0.0305329	0.0289318
299.2	0.0630946	0.0457551	0.0301937	0.0307643	0.0294389
299.4	0.0632314	0.0454577	0.0306586	0.0310199	0.0296556
299.6	0.062801	0.0451316	0.030764	0.0306989	0.0290377
299.8	0.0628277	0.0452226	0.0308449	0.030636	0.0289607
300	0.0629587	0.0449487	0.030705	0.0303153	0.0290379
300.2	0.0630587	0.0452289	0.0308001	0.0300619	0.0290968
300.4	0.0625851	0.0445182	0.030775	0.0297008	0.0289708
300.6	0.0627014	0.0449323	0.0315032	0.0301073	0.0293188
300.8	0.062031	0.0443722	0.0309772	0.0294513	0.0285436
301	0.0622958	0.0446884	0.031037	0.0294857	0.0286656
301.2	0.0621087	0.04493	0.0309466	0.02928	0.0286354
301.4	0.0621778	0.0449087	0.0307443	0.0294839	0.0285021
301.6	0.0616961	0.0446583	0.0304029	0.0295143	0.0282459
301.8	0.0619611	0.044741	0.030466	0.0297002	0.0282606
302	0.0618167	0.0445517	0.030215	0.0300578	0.0281859
302.2	0.0620295	0.0454041	0.0303394	0.0304912	0.0288328
302.4	0.062386	0.0452616	0.0305004	0.0305805	0.0289936
302.6	0.0627955	0.0458427	0.0307099	0.0305111	0.0289675
302.8	0.0635596	0.0464129	0.0316537	0.0312423	0.0295469
303	0.0639162	0.0467089	0.0319952	0.0314875	0.0297642
303.2	0.0641972	0.0475424	0.0326468	0.0319822	0.0306665
303.4	0.0643243	0.047587	0.0330475	0.0322371	0.030704
303.6	0.0650975	0.048195	0.033447	0.032489	0.031103
303.8	0.0651796	0.0476549	0.0334223	0.0323587	0.0312268
304	0.065892	0.0476196	0.033427	0.0325515	0.0317023
304.2	0.0653249	0.046921	0.0327069	0.0319971	0.030933
304.4	0.0647587	0.0463158	0.032057	0.0314118	0.0301279
304.6	0.0643437	0.0462061	0.0315988	0.0312397	0.0295112
304.8	0.0639376	0.0453899	0.0305072	0.030307	0.028358
305	0.0641185	0.0453499	0.029996	0.0302482	0.0284035
305.2	0.063785	0.0451964	0.0297017	0.0306021	0.0282445
305.4	0.0634937	0.0446077	0.0292604	0.0309975	0.0277573
305.6	0.0637188	0.0444953	0.0292255	0.0313316	0.0277661
305.8	0.063531	0.0441515	0.0288592	0.0314413	0.0277332
306	0.0634993	0.0442838	0.0287522	0.0313189	0.0275203
306.2	0.0637259	0.0445123	0.0291684	0.0314958	0.0280707
306.4	0.0631262	0.0441892	0.0293889	0.0309775	0.027459
306.6	0.0628447	0.0441467	0.0294895	0.0308965	0.0275038
306.8	0.0625313	0.0440263	0.0294069	0.0308442	0.0274565
307	0.0621243	0.0446063	0.0296217	0.0304914	0.0275845
307.2	0.062731	0.0448633	0.030264	0.0306314	0.0280214
307.4	0.0637865	0.045316	0.030918	0.0310678	0.0283404
307.6	0.0644281	0.0457783	0.0314779	0.0314921	0.02888
307.8	0.0648187	0.0457457	0.0315949	0.0314443	0.0290309
308	0.0649379	0.0459557	0.0316106	0.0312297	0.0290922
308.2	0.0649127	0.0459101	0.031311	0.0306503	0.0287722
308.4	0.0649783	0.0460139	0.0314552	0.0303214	0.0286614
308.6	0.0651933	0.0458325	0.0312856	0.0304321	0.0290145
308.8	0.0652958	0.0459963	0.0313082	0.0301624	0.0290704
309	0.0655907	0.0463775	0.0313495	0.0303785	0.0295105
309.2	0.0650722	0.0460395	0.0310316	0.0305379	0.0291476
309.4	0.0651577	0.0461524	0.0308253	0.0309415	0.0293052
309.6	0.0647898	0.0456458	0.0306536	0.0307521	0.0292763
309.8	0.0643174	0.045276	0.0304441	0.0305007	0.0290715
310	0.063532	0.044874	0.0304254	0.0302827	0.02864
310.2	0.0627688	0.0446692	0.0304388	0.0303208	0.0288288
310.4	0.0615777	0.0441407	0.0301166	0.0295812	0.0281296
310.6	0.0611679	0.0438806	0.0299518	0.0295206	0.0280727
310.8	0.0609717	0.0438838	0.0298521	0.0297594	0.0281408
311	0.0608302	0.0442673	0.0304519	0.0303473	0.0283952
311.2	0.0617809	0.0440685	0.0303693	0.0308628	0.0279818
311.4	0.0618446	0.0443946	0.0305465	0.0314067	0.0280289
311.6	0.061836	0.0447053	0.0306857	0.0316937	0.0282217
311.8	0.0626173	0.0454037	0.030863	0.0320309	0.0282981
312	0.0629332	0.045375	0.0312036	0.0320019	0.0284451
312.2	0.0635107	0.0454261	0.0310461	0.0317557	0.028516
312.4	0.0642094	0.0460786	0.031114	0.0319929	0.0283911
312.6	0.0650662	0.0464617	0.0311689	0.0324765	0.0287406
312.8	0.0648607	0.0469258	0.031207	0.0326636	0.0288584
313	0.0656018	0.0472181	0.031008	0.0327378	0.0288997
313.2	0.0658347	0.0471319	0.0311977	0.0331248	0.0290318
313.4	0.0663625	0.0475899	0.0315272	0.0335889	0.0294122
313.6	0.0665548	0.0473787	0.0317054	0.0333302	0.0292495
313.8	0.0667761	0.0478452	0.0318261	0.0333168	0.0293809
314	0.065795	0.0476581	0.0320039	0.0328404	0.0291594
314.2	0.0658525	0.0482423	0.0327305	0.0332107	0.0297501
314.4	0.0656282	0.0484576	0.0329832	0.0331678	0.0299592
314.6	0.0657097	0.0488343	0.0334647	0.0333306	0.0302594
314.8	0.0651184	0.0481879	0.0329799	0.0332132	0.0302254
315	0.064484	0.0480872	0.0330053	0.0330329	0.0299969
315.2	0.064588	0.0480406	0.0325206	0.0329349	0.0294438
315.4	0.0639182	0.0482524	0.0323203	0.0322958	0.0292256
315.6	0.0636308	0.0484274	0.0319319	0.0319612	0.0290909
315.8	0.0637375	0.0483982	0.031685	0.0319219	0.0290651
316	0.0635144	0.0478746	0.0314846	0.0316835	0.0294076
316.2	0.0631569	0.047599	0.0309841	0.0313181	0.0290004
316.4	0.0635368	0.04729	0.0308237	0.0314077	0.0289097
316.6	0.0628825	0.0465087	0.0303401	0.0314017	0.0292261
316.8	0.0623686	0.0464305	0.0296412	0.0311561	0.0291767
317	0.063693	0.0467457	0.0301536	0.0314569	0.0299413
317.2	0.0642566	0.0466521	0.0306274	0.0322755	0.0302527
317.4	0.0645586	0.0464572	0.030435	0.0321293	0.0300064
317.6	0.0651416	0.0463744	0.0306622	0.0325919	0.0304938
317.8	0.0651804	0.0461659	0.0308261	0.0326347	0.0306432
318	0.0652775	0.0458929	0.031469	0.0327889	0.03089
318.2	0.0658744	0.0459693	0.0320743	0.0331533	0.0313461
318.4	0.0662113	0.0462709	0.0321467	0.0329738	0.0312264
318.6	0.066482	0.0463279	0.0327079	0.0331494	0.0315194
318.8	0.0659562	0.0457759	0.0324461	0.033113	0.0310542
319	0.0660564	0.0462992	0.0326324	0.0329481	0.0306102
319.2	0.0663603	0.0466444	0.0328227	0.0329291	0.0303579
319.4	0.0660702	0.0469476	0.0325977	0.032508	0.0300751
319.6	0.0654895	0.0463197	0.0323172	0.0320747	0.0300592
319.8	0.0656726	0.0460071	0.0325112	0.0322598	0.0300421
320	0.0655785	0.0459877	0.0328901	0.0321023	0.0300593
320.2	0.065109	0.0455822	0.0327891	0.0314559	0.0295926
320.4	0.0651928	0.0454763	0.0325888	0.0312223	0.0295601
320.6	0.0646371	0.0456787	0.0325214	0.0308596	0.0294636
320.8	0.0648142	0.0464266	0.0327234	0.0305964	0.0295057
321	0.0649761	0.0462932	0.0331738	0.0307367	0.0295917
321.2	0.0649856	0.0460424	0.0329044	0.0309132	0.0288656
321.4	0.0649598	0.0459023	0.0328422	0.0311497	0.0290009
321.6	0.0654069	0.046086	0.0326062	0.0313562	0.0290872
321.8	0.0649268	0.0461411	0.03257	0.0307656	0.0287121
322	0.0649761	0.0465385	0.0326907	0.0307971	0.0286795
322.2	0.0650411	0.0471159	0.0328622	0.0312752	0.02919
322.4	0.064836	0.0476424	0.0329119	0.0317	0.0294443
322.6	0.0646001	0.0479668	0.0333878	0.0322427	0.029958
322.8	0.0636566	0.0475746	0.032571	0.0318125	0.0293735
323	0.0637922	0.0475424	0.0324107	0.0315685	0.0295341
323.2	0.0632835	0.0472295	0.0321492	0.0311712	0.0296144
323.4	0.0631177	0.0470226	0.0319511	0.0312177	0.0297546
323.6	0.0633574	0.0469129	0.0322596	0.0315468	0.0300885
323.8	0.0641556	0.0472537	0.0328421	0.0326083	0.0305088
324	0.0646252	0.0480648	0.0332543	0.0330486	0.0314248
324.2	0.0649581	0.0483297	0.0336272	0.033316	0.0320394
324.4	0.0655356	0.0485087	0.0336196	0.0334006	0.0320525
324.6	0.0655719	0.0483452	0.0333779	0.0331234	0.0320659
324.8	0.0658323	0.0488926	0.0330915	0.0330907	0.0318786
325	0.0662178	0.0484813	0.0330339	0.0332618	0.0319089
325.2	0.067026	0.0490474	0.0333813	0.0339134	0.0320229
325.4	0.0670446	0.0490643	0.0332708	0.0337713	0.0321515
325.6	0.0670262	0.0491675	0.0328121	0.0329268	0.0317252
325.8	0.0666838	0.0495886	0.0331195	0.0327702	0.0316507
326	0.0672152	0.0498999	0.0332583	0.0331098	0.0319636
326.2	0.0671662	0.0496617	0.0330842	0.0327465	0.0318543
326.4	0.0667921	0.049259	0.0330129	0.0325143	0.0314132
326.6	0.0666899	0.0488227	0.0330179	0.0324403	0.0312735
326.8	0.0664924	0.0478937	0.0324593	0.0319724	0.0306791
327	0.0664985	0.047629	0.0323533	0.0318144	0.0302879
327.2	0.0665553	0.0475358	0.0323945	0.031965	0.0301288
327.4	0.0669195	0.0475791	0.0326248	0.0327442	0.0302321
327.6	0.0668154	0.0476867	0.0328124	0.0331405	0.0299904
327.8	0.066909	0.0474419	0.0329035	0.0336383	0.0300909
328	0.0669245	0.0477619	0.0329901	0.0338307	0.0307424
328.2	0.0664753	0.0469963	0.0327152	0.0335721	0.0304626
328.4	0.0659741	0.046301	0.0323332	0.0326012	0.0299244
328.6	0.0660537	0.0466604	0.0324555	0.0326967	0.0304294
328.8	0.0654785	0.0464388	0.0321617	0.0321685	0.0299655
329	0.0654684	0.0468047	0.032389	0.0320485	0.0305687
329.2	0.0651607	0.0471202	0.0325491	0.0321494	0.0305588
329.4	0.064705	0.0471431	0.0325185	0.0318578	0.0305135
329.6	0.06478	0.0472587	0.032346	0.0313889	0.0303275
329.8	0.0649137	0.0477276	0.0327529	0.0314391	0.0304414
330	0.0651338	0.0473542	0.0329881	0.0312528	0.030593
330.2	0.0649514	0.0470466	0.0326988	0.0311177	0.030131
330.4	0.0654555	0.0474277	0.0332092	0.0322599	0.030666
330.6	0.0662669	0.0476649	0.0337514	0.0328555	0.0310276
330.8	0.0666195	0.0481232	0.0339615	0.0332166	0.0309529
331	0.0670857	0.049127	0.0343957	0.0335181	0.0310905
331.2	0.0674091	0.0495058	0.0347641	0.0338594	0.0314514
331.4	0.067371	0.0495971	0.0348343	0.0341195	0.0316756
331.6	0.0673009	0.0495675	0.035237	0.0345586	0.0316672
331.8	0.0672198	0.0496499	0.035429	0.0348874	0.0321926
332	0.0671902	0.0497523	0.03551	0.0348854	0.0326854
332.2	0.0667117	0.0491143	0.0353225	0.0345426	0.0324872
332.4	0.0669685	0.0497292	0.0355957	0.0347788	0.033121
332.6	0.0671905	0.0501578	0.0357215	0.035177	0.0338259
332.8	0.0665459	0.0494526	0.0351171	0.0348234	0.0334588
333	0.0665864	0.0500413	0.0353714	0.035002	0.0339081
333.2	0.066366	0.0492713	0.0350736	0.0348484	0.0335247
333.4	0.0666193	0.0490226	0.034991	0.0347985	0.0335861
333.6	0.0670242	0.0488092	0.0346147	0.0350086	0.0336246
333.8	0.066622	0.0484991	0.034421	0.0346834	0.033397
334	0.0664238	0.0480685	0.0337602	0.0342246	0.0330924
334.2	0.0661181	0.047567	0.0331223	0.0340213	0.0325633
334.4	0.0667942	0.0479207	0.0334327	0.0344558	0.0326206
334.6	0.0662075	0.0475152	0.0326532	0.0338659	0.0319982
334.8	0.0651938	0.0474415	0.0322393	0.0336839	0.0315063
335	0.0649746	0.0474632	0.0324703	0.033752	0.031237
335.2	0.064775	0.0471889	0.0324348	0.0334891	0.0312585
335.4	0.0646915	0.0468911	0.0326814	0.0335604	0.0312789
335.6	0.064469	0.0469909	0.0328077	0.0333047	0.030947
335.8	0.0648317	0.0472875	0.0329486	0.0327731	0.0314347
336	0.0650863	0.0477086	0.033147	0.0325911	0.031298
336.2	0.0651276	0.0477939	0.0329171	0.0324147	0.0308961
336.4	0.0655252	0.0485329	0.0332648	0.0327537	0.0310713
336.6	0.0659119	0.048532	0.0335251	0.0326404	0.0309284
336.8	0.0664886	0.0483981	0.0337319	0.0326303	0.0308181
337	0.0669151	0.0486042	0.0341272	0.0323367	0.0308313
337.2	0.0676064	0.0485237	0.0337636	0.0321793	0.0305723
337.4	0.0683363	0.0490524	0.0339705	0.032707	0.030965
337.6	0.0684159	0.0492092	0.0339194	0.0329138	0.031016
337.8	0.0681511	0.0496541	0.0337499	0.0324211	0.0309416
338	0.0682785	0.0498938	0.0335815	0.0328578	0.0312324
338.2	0.0681679	0.0496828	0.0337394	0.0328121	0.0312789
338.4	0.0682837	0.0497385	0.0337215	0.0331911	0.0313367
338.6	0.0674427	0.0490007	0.0328911	0.0330263	0.0313034
338.8	0.0673085	0.0492083	0.0335685	0.0338228	0.0317722
339	0.0678412	0.0491876	0.0340266	0.0342538	0.0322317
339.2	0.0678079	0.0490381	0.0342043	0.0342191	0.0325347
339.4	0.0674748	0.048724	0.0342524	0.0341517	0.032549
339.6	0.0677943	0.0488021	0.034425	0.0344416	0.0324531
339.8	0.0680958	0.0486074	0.0346455	0.0350355	0.0325502
340	0.0675247	0.0486096	0.0341517	0.0350574	0.0316711
340.2	0.0679373	0.0484781	0.0340406	0.0353786	0.0315247
340.4	0.0680219	0.0488029	0.03407	0.0356295	0.0314127
340.6	0.0684357	0.0491569	0.0345454	0.0356085	0.0315228
340.8	0.0688789	0.0493248	0.0346587	0.0355781	0.0316098
341	0.0688011	0.0495181	0.0343195	0.0352478	0.0312882
341.2	0.0686372	0.0491917	0.0343591	0.0350854	0.031148
341.4	0.0684168	0.0491414	0.0343267	0.0353332	0.0311152
341.6	0.0681705	0.0489147	0.0342438	0.0347687	0.0308657
341.8	0.0677944	0.0494809	0.034181	0.0346826	0.0308047
342	0.0676902	0.0492056	0.0344865	0.0345437	0.0311203
342.2	0.0672526	0.0487348	0.0342315	0.0333665	0.0308599
342.4	0.0669136	0.0486024	0.0341576	0.0331072	0.0309597
342.6	0.0668072	0.0487991	0.0340539	0.0329723	0.0312052
342.8	0.0668003	0.0486196	0.0341072	0.0327848	0.031286
343	0.0668016	0.0483165	0.033647	0.0322177	0.031094
343.2	0.0664553	0.047833	0.0333095	0.031975	0.0308672
343.4	0.0663933	0.0473571	0.0330912	0.0314616	0.0305184
343.6	0.0667763	0.0472654	0.0332448	0.0317249	0.0305075
343.8	0.0665013	0.0469125	0.0329156	0.0317641	0.0304022
344	0.0664751	0.0473838	0.0327299	0.0316743	0.0303218
344.2	0.0668058	0.0477528	0.0329632	0.0319746	0.0309078
344.4	0.0668366	0.0479914	0.0331827	0.0321661	0.0310532
344.6	0.0668355	0.0481524	0.0336364	0.0325533	0.031149
344.8	0.0671182	0.0483523	0.0335374	0.0329355	0.0310339
345	0.0672992	0.0483227	0.0338901	0.0332183	0.0311186
345.2	0.0672907	0.0481662	0.034442	0.0335676	0.0314273
345.4	0.0674628	0.0482393	0.0340654	0.0335771	0.0312062
345.6	0.06742	0.048198	0.034149	0.0335701	0.0312795
345.8	0.0674878	0.0486224	0.0343216	0.0338834	0.0314736
346	0.06785	0.048567	0.0344927	0.0342808	0.0318917
346.2	0.0675338	0.0485988	0.0339268	0.0339716	0.0316134
346.4	0.0677683	0.0488615	0.0341463	0.0343509	0.0319962
346.6	0.0684301	0.0491674	0.0341128	0.0343381	0.0321251
346.8	0.0688955	0.0489071	0.0342764	0.0343439	0.032362
347	0.0688381	0.0488866	0.0340599	0.0345284	0.032267
347.2	0.0688983	0.0487599	0.0343058	0.0346473	0.0323954
347.4	0.0686341	0.0487335	0.0341545	0.0339511	0.0322174
347.6	0.0685244	0.0489984	0.0342142	0.0340782	0.0326524
347.8	0.0687877	0.0489649	0.0341726	0.034273	0.0328116
348	0.0690634	0.0495111	0.0348188	0.0348678	0.0331753
348.2	0.0692837	0.0495012	0.0350743	0.0349481	0.0333823
348.4	0.0693604	0.0492342	0.0354457	0.0352587	0.0332655
348.6	0.0687694	0.0494145	0.035416	0.0352623	0.0329596
348.8	0.0688833	0.0498632	0.0357831	0.0353907	0.0331526
349	0.0684949	0.0499527	0.0356689	0.0352816	0.0332787
349.2	0.067914	0.0500554	0.035512	0.0355821	0.0332655
349.4	0.0672524	0.0497114	0.0350536	0.0350794	0.0327788
349.6	0.0669788	0.0494242	0.0349201	0.0350591	0.0328288
349.8	0.066835	0.049455	0.0347565	0.0347398	0.0326827
350	0.0668053	0.04907	0.0344694	0.0348569	0.032767
350.2	0.0666719	0.0486711	0.034528	0.0347394	0.0326748
350.4	0.0665169	0.048087	0.034457	0.0343221	0.0322104
350.6	0.0668532	0.0481571	0.0344574	0.0341158	0.032234
350.8	0.066573	0.0477888	0.0342939	0.0338335	0.0321759
351	0.0663659	0.0478149	0.0339619	0.033787	0.0318681
351.2	0.0665563	0.047817	0.033828	0.03357	0.0318814
351.4	0.0666561	0.0473331	0.0331782	0.0332421	0.0317991
351.6	0.0672681	0.0472525	0.0333245	0.0337015	0.0322335
351.8	0.0683484	0.0469795	0.0333343	0.0336773	0.0323939
352	0.0685314	0.047012	0.0335045	0.0337595	0.0322555
352.2	0.068684	0.0469794	0.033234	0.033568	0.0318202
352.4	0.0688207	0.0473998	0.0334517	0.0339848	0.032093
352.6	0.0687935	0.0478513	0.0333189	0.0340537	0.0323878
352.8	0.069464	0.0485683	0.0334671	0.0345753	0.0327365
353	0.0689877	0.0486452	0.0331117	0.0346364	0.0322691
353.2	0.068816	0.0490186	0.0334182	0.0346167	0.0324081
353.4	0.0687138	0.0491818	0.033326	0.0338622	0.0322433
353.6	0.069173	0.0495929	0.0335746	0.0338497	0.0326008
353.8	0.0690127	0.0501247	0.0334445	0.0340427	0.032914
354	0.0691951	0.050379	0.0335213	0.0342664	0.0330709
354.2	0.0694322	0.0506092	0.0339533	0.0343569	0.0331045
354.4	0.0694823	0.0506997	0.0337849	0.0342601	0.0330637
354.6	0.069593	0.051073	0.0337768	0.034352	0.0331954
354.8	0.0692193	0.0516008	0.0336043	0.0343395	0.0333346
355	0.0693665	0.0515998	0.0337527	0.0347431	0.0334531
355.2	0.0691492	0.0508903	0.0332208	0.0349734	0.0334914
355.4	0.0692862	0.0503118	0.0333982	0.0349825	0.0335538
355.6	0.0687258	0.0497703	0.0330906	0.0345976	0.033047
355.8	0.0681083	0.0491218	0.03275	0.0338753	0.0322274
356	0.0680369	0.0491355	0.0329806	0.0339899	0.0320561
356.2	0.0687568	0.0491864	0.0335992	0.0345473	0.0321601
356.4	0.0694415	0.0489525	0.033724	0.0347746	0.0326623
356.6	0.0697495	0.048262	0.0337549	0.0344029	0.0324413
356.8	0.0698074	0.0482384	0.0339715	0.034349	0.0319863
357	0.0694035	0.0483005	0.0340425	0.0340384	0.0319949
357.2	0.0693976	0.0483491	0.0341386	0.0335349	0.0319293
357.4	0.0696493	0.0479365	0.0339599	0.0335763	0.0318264
357.6	0.0697325	0.0479572	0.0340112	0.0334715	0.0320845
357.8	0.069405	0.0482089	0.0340566	0.0340275	0.0324577
358	0.0694064	0.0483601	0.0344046	0.034369	0.0325287
358.2	0.0693889	0.048443	0.0346515	0.0347962	0.0327213
358.4	0.0689603	0.0484008	0.0344631	0.0350075	0.0327348
358.6	0.0682692	0.0485382	0.0341642	0.0349057	0.0324478
358.8	0.0678116	0.0487666	0.0339845	0.0349743	0.0326223
359	0.0674543	0.0483264	0.0338389	0.0349217	0.0324202
359.2	0.066859	0.0481678	0.0333825	0.0347646	0.0321004
359.4	0.066472	0.0481159	0.0334415	0.0344583	0.0317469
359.6	0.0656389	0.0479268	0.0328992	0.0339735	0.0311583
359.8	0.0654933	0.0479213	0.0329042	0.0337177	0.0310169
360	0.0566102	0.0482844	0.0334105	0.0355888	0.0348605
360.2	0.0554639	0.0473594	0.0327751	0.0352381	0.0345692
360.4	0.0541628	0.046446	0.0325008	0.0350064	0.0344241
360.6	0.0525974	0.045515	0.0323636	0.0344145	0.0339649
360.8	0.0512346	0.0442904	0.0321258	0.0340911	0.0335855
361	0.0497419	0.0430469	0.0314471	0.0336321	0.0332788
361.2	0.0483815	0.0420024	0.0307257	0.0332144	0.033112
361.4	0.047163	0.0410907	0.0302172	0.0328515	0.0330888
361.6	0.0461197	0.0403655	0.0296896	0.0327185	0.0327781
361.8	0.0453374	0.0393454	0.0291717	0.0323846	0.0326671
362	0.044877	0.0389625	0.0288757	0.0324021	0.0329432
362.2	0.0444283	0.0388185	0.0281738	0.0325691	0.0330191
362.4	0.0437939	0.0386145	0.0276887	0.0324658	0.0327953
362.6	0.0436044	0.0387487	0.0279151	0.0326848	0.0335717
362.8	0.0436443	0.0391014	0.0278611	0.0334075	0.0341176
363	0.0439051	0.0396724	0.0287986	0.0340301	0.0348714
363.2	0.0443134	0.0401339	0.0297119	0.0347695	0.0351839
363.4	0.0443024	0.0403499	0.0300314	0.0349477	0.0353224
363.6	0.0448015	0.0403968	0.0304871	0.0351754	0.0357654
363.8	0.0445329	0.0402771	0.0305591	0.0352011	0.0354847
364	0.0442304	0.0404279	0.030736	0.0352307	0.0358056
364.2	0.0441151	0.0405627	0.0307375	0.0351571	0.0360738
364.4	0.0439113	0.0403412	0.0314275	0.0351273	0.036143
364.6	0.0435911	0.0400726	0.0311885	0.034621	0.0355822
364.8	0.0435107	0.0391447	0.0308469	0.0341997	0.035569
365	0.0435202	0.0385178	0.0306335	0.0337527	0.0354237
365.2	0.0437428	0.0385212	0.0304787	0.0333624	0.0354454
365.4	0.0435497	0.0379104	0.0302765	0.032613	0.0352122
365.6	0.0427258	0.0374633	0.029899	0.0316893	0.0342725
365.8	0.0425507	0.0370395	0.0296094	0.031185	0.0341279
366	0.0421122	0.0370326	0.0291721	0.0309339	0.0340699
366.2	0.041636	0.0370585	0.0281573	0.0307148	0.0339017
366.4	0.0414937	0.0371267	0.027713	0.0302737	0.0338968
366.6	0.0419575	0.0377075	0.0285233	0.0307578	0.0346759
366.8	0.0420454	0.0379939	0.0283657	0.0309412	0.0347817
367	0.0419038	0.0382627	0.0288263	0.030928	0.0348128
367.2	0.0417684	0.0379674	0.0287619	0.031071	0.0348328
367.4	0.0418202	0.0374023	0.0284291	0.0307227	0.0345723
367.6	0.041683	0.0372051	0.0286749	0.0306469	0.0348028
367.8	0.0407142	0.0370323	0.0283004	0.0306106	0.0343355
368	0.0406188	0.0369869	0.0284827	0.0310286	0.0346966
368.2	0.0409569	0.0367795	0.0286411	0.0315632	0.0347761
368.4	0.041232	0.0363054	0.0287864	0.0321715	0.0346157
368.6	0.041764	0.0364897	0.028619	0.0326219	0.0344965
368.8	0.0426016	0.0364407	0.0291181	0.033448	0.0348887
369	0.0425391	0.0362695	0.0292731	0.0335427	0.0343184
369.2	0.042288	0.036701	0.0291295	0.0337354	0.0340386
369.4	0.0416186	0.0367537	0.0292287	0.0338204	0.0334196
369.6	0.0411317	0.036812	0.0291189	0.0339197	0.0328885
369.8	0.0415934	0.0372667	0.0292849	0.0342009	0.0331144
370	0.0414014	0.0377168	0.0290826	0.0340954	0.0331148
370.2	0.0414141	0.0379357	0.0291502	0.0336031	0.0334192
370.4	0.0411596	0.0381128	0.0296798	0.0331439	0.0333957
370.6	0.0414248	0.0381554	0.0304238	0.0331707	0.0339135
370.8	0.040897	0.0380157	0.0303813	0.0328727	0.0339002
371	0.0407879	0.0383066	0.0308542	0.0331185	0.0340886
371.2	0.0404487	0.0379566	0.0304615	0.0327801	0.0337996
371.4	0.0405554	0.0380814	0.0308618	0.032532	0.0339862
371.6	0.0400026	0.0383829	0.0312171	0.0327395	0.0345181
371.8	0.0398766	0.0382056	0.0314239	0.0327874	0.0348968
372	0.0406987	0.0386275	0.0319212	0.0331907	0.0358341
372.2	0.0414092	0.0386622	0.0322443	0.0336262	0.036475
372.4	0.041656	0.0383565	0.032264	0.0337027	0.0363393
372.6	0.0424901	0.0387221	0.0322439	0.0344052	0.0366609
372.8	0.0427993	0.0384032	0.0322416	0.0345518	0.0368039
373	0.0421737	0.0379327	0.0318003	0.034253	0.0363851
373.2	0.0421942	0.0382752	0.0316507	0.0349156	0.0365382
373.4	0.04201	0.0380821	0.0314896	0.0346984	0.0367217
373.6	0.0421834	0.0374398	0.0307713	0.0341759	0.0366659
373.8	0.0427321	0.0376177	0.0309957	0.0343409	0.036917
374	0.0421798	0.0377718	0.0305632	0.0340799	0.0368393
374.2	0.0418076	0.0371479	0.0306338	0.0332081	0.0365973
374.4	0.0415713	0.0372425	0.0306299	0.0330882	0.0362461
374.6	0.041271	0.0371018	0.0306038	0.0327794	0.036255
374.8	0.0404059	0.0370652	0.0305263	0.0325389	0.035858
375	0.0408049	0.0374481	0.0305989	0.0330972	0.0358642
375.2	0.0402082	0.0369691	0.0301217	0.0328219	0.0353136
375.4	0.0398719	0.03685	0.0304748	0.032522	0.0354608
375.6	0.039267	0.0368989	0.0305225	0.032487	0.0352372
375.8	0.0393012	0.0364784	0.030438	0.0320982	0.0350153
376	0.0395213	0.0365166	0.0302294	0.0323574	0.034918
376.2	0.0395066	0.0359635	0.0299091	0.0325098	0.0346606
376.4	0.0395331	0.0361934	0.0295556	0.0326986	0.0344838
376.6	0.0398389	0.0365086	0.0293973	0.0329591	0.034624
376.8	0.0400768	0.0365898	0.0297697	0.0331799	0.0348726
377	0.0400785	0.0369548	0.0300412	0.0341904	0.0354702
377.2	0.0397617	0.0365756	0.0299394	0.0343882	0.0355186
377.4	0.039852	0.036447	0.0301593	0.0345094	0.0358768
377.6	0.0400196	0.0363042	0.0303062	0.0346945	0.0358797
377.8	0.0407888	0.0368226	0.0309648	0.0350915	0.0366546
378	0.0401065	0.0367782	0.0307314	0.0345877	0.0367992
378.2	0.0400408	0.0362696	0.0308418	0.0342257	0.0364749
378.4	0.0406356	0.0364753	0.0313683	0.0347293	0.0369072
378.6	0.0407191	0.0366085	0.0318613	0.0350128	0.0373251
378.8	0.0407486	0.0366778	0.0318507	0.0349641	0.0373828
379	0.0415259	0.0364555	0.032238	0.0352551	0.0371262
379.2	0.0410048	0.0363542	0.0321475	0.0348977	0.0367722
379.4	0.0407343	0.0362633	0.0321246	0.0348022	0.0367336
379.6	0.0411477	0.0368473	0.0324407	0.0355288	0.0368394
379.8	0.0414941	0.0370295	0.0325276	0.0356903	0.0371187
380	0.0420013	0.037482	0.0325777	0.0362153	0.0374061
380.2	0.0422508	0.0380957	0.0327195	0.0362718	0.0379015
380.4	0.0423435	0.0388343	0.0326082	0.0360219	0.0381212
380.6	0.0424314	0.0390678	0.0329856	0.0360891	0.0379285
380.8	0.0429077	0.0396571	0.0335557	0.0368161	0.0384119
381	0.0427877	0.0396509	0.0334621	0.0370484	0.0385823
381.2	0.0425316	0.0391718	0.032983	0.0362636	0.0376514
381.4	0.0425072	0.0392645	0.032617	0.0363878	0.0377478
381.6	0.0424553	0.0388587	0.0320896	0.035765	0.0374057
381.8	0.0427178	0.0388961	0.0319705	0.0355852	0.0377156
382	0.0423552	0.0381908	0.031762	0.0355152	0.0377848
382.2	0.0424887	0.0379451	0.0320696	0.0353351	0.0377051
382.4	0.0427258	0.0378067	0.032532	0.0355182	0.0379626
382.6	0.0421587	0.0378139	0.0322171	0.0354252	0.0377385
382.8	0.041747	0.0374862	0.0318373	0.0350341	0.0374992
383	0.0417455	0.0374631	0.0321196	0.0352462	0.0373947
383.2	0.0410947	0.0373513	0.0316241	0.0351124	0.0374607
383.4	0.0407933	0.0367244	0.031566	0.0352305	0.0376562
383.6	0.0406295	0.0370267	0.0320123	0.0353373	0.0379949
383.8	0.0403625	0.0372081	0.0324628	0.0353045	0.0382649
384	0.0405273	0.0373705	0.0328902	0.0360328	0.0386154
384.2	0.0404256	0.037728	0.032976	0.0359208	0.0388889
384.4	0.0394906	0.0374005	0.0324438	0.035186	0.0381141
384.6	0.0395381	0.037936	0.0328644	0.0355734	0.0380786
384.8	0.0393934	0.0379535	0.0328968	0.0354443	0.0381381
385	0.0392197	0.0373659	0.0322158	0.0347063	0.037292
385.2	0.0394089	0.0372491	0.031812	0.0344765	0.0369051
385.4	0.0392685	0.036997	0.0311899	0.0345507	0.0366502
385.6	0.0397347	0.0372622	0.0313204	0.0345963	0.0364764
385.8	0.0405041	0.0376985	0.0317169	0.0351266	0.0368726
386	0.0413012	0.0380646	0.0322029	0.0355956	0.0374179
386.2	0.0414572	0.0387264	0.0320253	0.0358375	0.0376419
386.4	0.0417932	0.0386711	0.0317559	0.0364907	0.0377521
386.6	0.0423107	0.0389353	0.0313525	0.0368537	0.0378139
386.8	0.0428163	0.0391654	0.031387	0.0371113	0.0382321
387	0.0432691	0.0394514	0.0317119	0.0373311	0.0386175
387.2	0.0429298	0.0385671	0.0317222	0.0368213	0.0383401
387.4	0.0427774	0.0386836	0.0322046	0.0368469	0.0386562
387.6	0.0427694	0.0393798	0.0326219	0.0369959	0.0390505
387.8	0.0431874	0.039556	0.0332133	0.0375704	0.0393662
388	0.0430358	0.0398109	0.0332234	0.0381118	0.0393527
388.2	0.0422302	0.0397322	0.032858	0.0372284	0.039036
388.4	0.0416916	0.0396508	0.0331946	0.0368953	0.0386322
388.6	0.0419681	0.0400419	0.0336043	0.0373692	0.0392713
388.8	0.0416305	0.0397286	0.0334944	0.0368146	0.0392726
389	0.0418668	0.0398244	0.0336151	0.036594	0.0392315
389.2	0.0417826	0.0400758	0.0336725	0.0364398	0.0391415
389.4	0.0420329	0.0405614	0.0342479	0.0364816	0.0391414
389.6	0.0425722	0.0412436	0.0347709	0.0363876	0.0391986
389.8	0.0430907	0.0419304	0.0351231	0.036638	0.0395472
390	0.0429907	0.0419443	0.0349366	0.0367012	0.0396139
390.2	0.042842	0.0419704	0.0348053	0.0370163	0.0395801
390.4	0.0428076	0.0411553	0.0346081	0.0368157	0.0393625
390.6	0.0426291	0.0411243	0.034152	0.0364658	0.0391492
390.8	0.0425816	0.040824	0.0343014	0.036429	0.039426
391	0.0424658	0.0400619	0.0342956	0.0359042	0.0391616
391.2	0.0421395	0.0395465	0.0343947	0.0356247	0.039047
391.4	0.0421409	0.0399014	0.0345726	0.035676	0.0393457
391.6	0.042362	0.039678	0.0347237	0.0357454	0.0397117
391.8	0.042335	0.0392722	0.0349994	0.0362844	0.0396383
392	0.0422186	0.03958	0.0352452	0.0366682	0.0398639
392.2	0.0419794	0.0396015	0.0353397	0.036782	0.0399795
392.4	0.042587	0.0400435	0.0359808	0.0375182	0.0404195
392.6	0.0428926	0.0400186	0.0359651	0.0381221	0.0407526
392.8	0.0432789	0.0406053	0.0362721	0.0382692	0.040968
393	0.0434954	0.0410616	0.0366498	0.0383792	0.040854
393.2	0.0434208	0.0413242	0.0366045	0.0383833	0.04066
393.4	0.0439577	0.0418465	0.0368721	0.0385757	0.0407937
393.6	0.043945	0.0420546	0.0366012	0.0383531	0.0403715
393.8	0.0438738	0.0425104	0.0366328	0.0388024	0.0408539
394	0.04367	0.042214	0.0356741	0.0383687	0.0401618
394.2	0.0439759	0.0424632	0.0359782	0.0383985	0.0404535
394.4	0.0437634	0.0423798	0.0352896	0.0380462	0.0402752
394.6	0.0431403	0.0422584	0.03467	0.0379481	0.0402431
394.8	0.0433713	0.0418477	0.0345195	0.0378543	0.0402512
395	0.0432801	0.0417015	0.0347666	0.0380034	0.0404023
395.2	0.0431381	0.0415742	0.0344271	0.0383272	0.0403336
395.4	0.0432113	0.0413749	0.0346413	0.0382588	0.0405865
395.6	0.0433376	0.0412509	0.0347317	0.0385544	0.0410215
395.8	0.0433964	0.0413056	0.0350804	0.0392845	0.0412236
396	0.0432927	0.0415462	0.0352184	0.0394171	0.0414105
396.2	0.0427776	0.0409108	0.0348459	0.0391721	0.0405847
396.4	0.0431479	0.0409864	0.0354488	0.0398251	0.0405484
396.6	0.0431951	0.0407216	0.0354343	0.0401835	0.0406392
396.8	0.0431192	0.0411277	0.0350838	0.0401695	0.0405534
397	0.0425925	0.0408024	0.0350334	0.0400561	0.0401892
397.2	0.0427589	0.0407544	0.0347313	0.0401368	0.0402583
397.4	0.0428586	0.0409385	0.0344553	0.039932	0.0400286
397.6	0.0427879	0.0411304	0.0344924	0.0398777	0.0400557
397.8	0.04281	0.041201	0.0347448	0.0399729	0.0404414
398	0.0430509	0.0412596	0.0346136	0.0399973	0.0402001
398.2	0.0435477	0.0417339	0.0358227	0.0406546	0.0413792
398.4	0.0432022	0.0420347	0.0358466	0.04071	0.0414782
398.6	0.0429247	0.0418778	0.0361153	0.0408787	0.0419814
398.8	0.0431093	0.0417308	0.0364925	0.0409259	0.0422867
399	0.0430206	0.0413244	0.03668	0.0412281	0.042555
399.2	0.0431339	0.0412691	0.0363228	0.0411071	0.0428964
399.4	0.043303	0.0415453	0.0370968	0.0409348	0.0436607
399.6	0.0432263	0.041592	0.0372835	0.0407693	0.0440362
[truncated: 1,601 more rows]
