# Supplementary material for: Specific binding of Hsp27 and phosphorylated Tau mitigates abnormal Tau aggregation-induced pathology
Source: eLife. 2022 Sep 1;11:e79898. doi: 10.7554/eLife.79898 (PMC9436411; doi:10.7554/eLife.79898)
Supplement: Figure 5—source data 1. — (Figure 5B). [file elife-79898-fig5-data1.xlsx]

## Sheet: B (left)
time	5 uM	2.5 uM	1.25 uM	0.625 uM	0.312 uM
0	0.020404	0.016608	-0.00227	-0.00111	-0.00336
0.2	0.021457	0.016454	-0.00227	-0.00031	-0.00335
0.4	0.022281	0.016082	-0.00236	0.000329	-0.0036
0.6	0.023169	0.015799	-0.00233	0.001068	-0.00366
0.8	0.023792	0.015793	-0.00245	0.001555	-0.00352
1	0.024699	0.016061	-0.00238	0.002188	-0.00353
1.2	0.025469	0.016096	-0.00233	0.002493	-0.00354
1.4	0.026718	0.016595	-0.00196	0.00301	-0.00342
1.6	0.027743	0.016963	-0.0019	0.003174	-0.00319
1.8	0.028608	0.017391	-0.00192	0.003362	-0.00323
2	0.029708	0.018301	-0.0015	0.003637	-0.00303
2.2	0.03068	0.019119	-0.00121	0.003922	-0.003
2.4	0.031626	0.019737	-0.00105	0.004183	-0.00256
2.6	0.032061	0.020356	-0.00103	0.004535	-0.00248
2.8	0.033058	0.020996	-0.00056	0.00492	-0.00232
3	0.034	0.021771	-0.00021	0.005516	-0.0021
3.2	0.03507	0.022311	0.000168	0.005612	-0.00211
3.4	0.036603	0.023541	0.000399	0.006199	-0.00168
3.6	0.037863	0.024531	0.001156	0.006563	-0.0013
3.8	0.039275	0.025476	0.002041	0.007296	-0.00077
4	0.040063	0.025992	0.002746	0.007534	-0.00046
4.2	0.041234	0.025916	0.002985	0.007848	-0.00014
4.4	0.041849	0.026727	0.003595	0.007889	0.000325
4.6	0.042673	0.027238	0.003892	0.00781	0.000395
4.8	0.043634	0.027844	0.004141	0.008444	0.000807
5	0.044777	0.028466	0.004731	0.008881	0.000964
5.2	0.045523	0.028579	0.005077	0.00871	0.001125
5.4	0.04693	0.029529	0.005956	0.009386	0.001566
5.6	0.047496	0.029628	0.005475	0.009129	0.001897
5.8	0.047578	0.029734	0.00523	0.00895	0.001365
6	0.048257	0.030352	0.005674	0.009175	0.001562
6.2	0.048589	0.030245	0.005071	0.008912	0.001592
6.4	0.04868	0.030275	0.004643	0.008274	0.001669
6.6	0.04938	0.03092	0.00498	0.009074	0.002075
6.8	0.05037	0.0313	0.005335	0.009235	0.002052
7	0.051328	0.032018	0.005502	0.009534	0.002336
7.2	0.052479	0.032229	0.00564	0.009481	0.00204
7.4	0.053473	0.033221	0.006134	0.010277	0.002353
7.6	0.05442	0.034249	0.007173	0.01083	0.002804
7.8	0.054922	0.03483	0.007707	0.011031	0.003003
8	0.055168	0.035002	0.008208	0.010913	0.002963
8.2	0.056107	0.035662	0.00826	0.010599	0.002818
8.4	0.056399	0.036747	0.008513	0.010405	0.002777
8.6	0.05714	0.037263	0.008217	0.010739	0.002281
8.8	0.058043	0.037709	0.008389	0.011272	0.002367
9	0.058617	0.038386	0.008629	0.011314	0.002096
9.2	0.059037	0.038656	0.00892	0.011344	0.001884
9.4	0.059237	0.038899	0.008646	0.011149	0.001621
9.6	0.059628	0.038778	0.008227	0.010623	0.001619
9.8	0.059926	0.038837	0.008576	0.0105	0.001608
10	0.06105	0.039819	0.008992	0.010722	0.002352
10.2	0.062327	0.040432	0.00885	0.010605	0.002503
10.4	0.063347	0.040986	0.00922	0.010544	0.002578
10.6	0.064765	0.04152	0.009743	0.011183	0.002969
10.8	0.065504	0.04147	0.010069	0.011328	0.002983
11	0.066663	0.042354	0.010821	0.012159	0.003592
11.2	0.068032	0.043256	0.011834	0.012494	0.003765
11.4	0.069044	0.044669	0.012873	0.013105	0.004036
11.6	0.069349	0.044912	0.013092	0.012743	0.003593
11.8	0.069302	0.045066	0.012811	0.011892	0.002897
12	0.070156	0.045368	0.012865	0.011748	0.002318
12.2	0.071312	0.045929	0.013009	0.011723	0.002458
12.4	0.071626	0.046212	0.012988	0.011849	0.002171
12.6	0.072114	0.04636	0.012722	0.012006	0.001961
12.8	0.072341	0.045951	0.012548	0.011697	0.001556
13	0.072405	0.046192	0.012405	0.011541	0.001299
13.2	0.072722	0.046258	0.012783	0.011442	0.001264
13.4	0.072903	0.045852	0.012448	0.011093	0.000754
13.6	0.073974	0.046468	0.013281	0.011569	0.001392
13.8	0.074868	0.046982	0.013693	0.012055	0.002323
14	0.075956	0.04753	0.013989	0.012366	0.002688
14.2	0.077427	0.048276	0.01463	0.013022	0.0029
14.4	0.07771	0.048117	0.014632	0.012792	0.003069
14.6	0.078408	0.048074	0.014548	0.012938	0.003332
14.8	0.078661	0.048312	0.014596	0.013217	0.003477
15	0.079721	0.049196	0.015022	0.013557	0.003535
15.2	0.0803	0.049522	0.015392	0.013157	0.003177
15.4	0.080619	0.049899	0.015129	0.012939	0.002936
15.6	0.080744	0.049926	0.014524	0.012601	0.002559
15.8	0.081167	0.050543	0.014892	0.01267	0.00227
16	0.082019	0.050973	0.015313	0.012848	0.002139
16.2	0.082566	0.051263	0.015612	0.012834	0.0024
16.4	0.08279	0.051114	0.014975	0.012537	0.001839
16.6	0.083368	0.05138	0.014676	0.012736	0.001963
16.8	0.084006	0.051615	0.014792	0.01272	0.001836
17	0.085052	0.052451	0.014925	0.012834	0.002039
17.2	0.085737	0.052954	0.015208	0.013234	0.002223
17.4	0.086685	0.053329	0.015501	0.013927	0.002364
17.6	0.08821	0.054228	0.016291	0.014406	0.003052
17.8	0.08952	0.054406	0.016708	0.014606	0.003374
18	0.090286	0.054736	0.017124	0.014554	0.003306
18.2	0.091298	0.055695	0.017812	0.014723	0.003341
18.4	0.091448	0.055664	0.017612	0.014456	0.003226
18.6	0.092206	0.056008	0.017836	0.014712	0.003547
18.8	0.093396	0.056805	0.018687	0.015368	0.004129
19	0.093882	0.057164	0.018963	0.015169	0.004197
19.2	0.093905	0.057313	0.019295	0.014809	0.004314
19.4	0.094041	0.057882	0.01941	0.014842	0.004422
19.6	0.09408	0.058401	0.01956	0.014497	0.004386
19.8	0.093951	0.058284	0.01979	0.014496	0.004047
20	0.094193	0.058532	0.019959	0.014532	0.004052
20.2	0.094648	0.058511	0.019384	0.014733	0.003844
20.4	0.095344	0.058725	0.019091	0.015268	0.003449
20.6	0.096263	0.059312	0.019592	0.016289	0.003909
20.8	0.096804	0.059306	0.019702	0.016431	0.003871
21	0.097673	0.060196	0.020081	0.017156	0.004403
21.2	0.098282	0.06075	0.020392	0.017487	0.004604
21.4	0.09961	0.061738	0.021373	0.018209	0.005177
21.6	0.100871	0.062196	0.02175	0.018356	0.005227
21.8	0.101429	0.062666	0.022	0.018093	0.004977
22	0.102271	0.063586	0.022616	0.018529	0.005481
22.2	0.103108	0.064444	0.02291	0.01918	0.005738
22.4	0.103751	0.064998	0.023046	0.019629	0.005867
22.6	0.104765	0.065493	0.023202	0.019762	0.006085
22.8	0.105465	0.066302	0.023316	0.019602	0.006512
23	0.10513	0.066104	0.022655	0.01884	0.005937
23.2	0.105659	0.065968	0.022575	0.018455	0.005528
23.4	0.106381	0.066448	0.02277	0.018633	0.005908
23.6	0.10668	0.066384	0.022351	0.01833	0.006067
23.8	0.107092	0.066461	0.022572	0.01846	0.005868
24	0.107234	0.06628	0.022491	0.018293	0.005364
24.2	0.107747	0.066151	0.02247	0.01799	0.004943
24.4	0.108522	0.067045	0.023287	0.01852	0.005166
24.6	0.108636	0.067293	0.023462	0.018509	0.005209
24.8	0.109097	0.067472	0.023595	0.018324	0.00527
25	0.109649	0.068047	0.024341	0.018534	0.005784
25.2	0.110277	0.068107	0.024502	0.018263	0.00564
25.4	0.110577	0.068153	0.024482	0.01805	0.00537
25.6	0.111091	0.068197	0.024422	0.01845	0.005004
25.8	0.111327	0.068545	0.024453	0.018189	0.004532
26	0.111988	0.068702	0.024802	0.01856	0.004989
26.2	0.112292	0.069262	0.024662	0.018842	0.004944
26.4	0.113176	0.070021	0.024838	0.019141	0.005042
26.6	0.1138	0.070374	0.024516	0.019143	0.005144
26.8	0.113763	0.070215	0.024112	0.018693	0.00501
27	0.114308	0.070084	0.024162	0.018778	0.004658
27.2	0.115517	0.070627	0.024206	0.018896	0.005138
27.4	0.116112	0.071097	0.024412	0.019109	0.005862
27.6	0.117061	0.071594	0.024723	0.01904	0.006009
27.8	0.117583	0.072015	0.02522	0.019183	0.005595
28	0.117725	0.07233	0.025759	0.019301	0.005732
28.2	0.118518	0.073597	0.026558	0.019617	0.006124
28.4	0.119268	0.0751	0.027519	0.020337	0.00683
28.6	0.119354	0.075405	0.027456	0.020505	0.006723
28.8	0.119868	0.07592	0.02798	0.020525	0.006832
29	0.119894	0.07618	0.02842	0.020391	0.006362
29.2	0.120198	0.076428	0.028373	0.020516	0.005687
29.4	0.120098	0.076894	0.028015	0.020314	0.005079
29.6	0.120228	0.077358	0.028246	0.020469	0.004996
29.8	0.120227	0.077392	0.028091	0.019893	0.004868
30	0.120587	0.077319	0.028317	0.019802	0.005036
30.2	0.120968	0.077894	0.028073	0.019573	0.005028
30.4	0.121725	0.077994	0.02827	0.019444	0.004804
30.6	0.12247	0.078141	0.028332	0.019352	0.004813
30.8	0.122818	0.077516	0.027859	0.018868	0.004425
31	0.124032	0.077785	0.028182	0.019271	0.004708
31.2	0.12454	0.077645	0.027713	0.018864	0.004416
31.4	0.125047	0.077545	0.027882	0.018744	0.004339
31.6	0.126163	0.077522	0.028185	0.019212	0.004538
31.8	0.126148	0.077474	0.028449	0.019341	0.00475
32	0.126582	0.077867	0.02869	0.019572	0.005079
32.2	0.127099	0.078376	0.029215	0.019574	0.005078
32.4	0.127638	0.078557	0.029624	0.019944	0.005131
32.6	0.127781	0.079059	0.029778	0.020235	0.00497
32.8	0.128356	0.079714	0.030374	0.020446	0.005537
33	0.128657	0.080334	0.030614	0.020879	0.005615
33.2	0.129455	0.081271	0.030942	0.021664	0.006137
33.4	0.129669	0.081747	0.031361	0.021997	0.006622
33.6	0.129946	0.082161	0.031942	0.022206	0.006738
33.8	0.130625	0.082508	0.032333	0.022762	0.007387
34	0.13138	0.083247	0.032854	0.022911	0.007765
34.2	0.132084	0.084169	0.033294	0.023409	0.00771
34.4	0.133037	0.084825	0.033588	0.024034	0.007926
34.6	0.133991	0.086063	0.033706	0.02441	0.008345
34.8	0.134141	0.085771	0.033147	0.023899	0.007904
35	0.133796	0.085513	0.032816	0.023497	0.007107
35.2	0.133241	0.085155	0.032089	0.022982	0.006677
35.4	0.133512	0.085335	0.032069	0.022559	0.006687
35.6	0.133697	0.085461	0.032274	0.022703	0.007297
35.8	0.133675	0.085639	0.032254	0.022093	0.007202
36	0.133997	0.085693	0.032192	0.022059	0.006657
36.2	0.134234	0.08628	0.03264	0.021589	0.006846
36.4	0.13428	0.086675	0.03235	0.021237	0.006946
36.6	0.13493	0.087593	0.032758	0.021504	0.007459
36.8	0.135505	0.087739	0.03287	0.021483	0.007645
37	0.136183	0.088357	0.032934	0.021749	0.007571
37.2	0.136971	0.088913	0.033491	0.022734	0.008191
37.4	0.137803	0.089353	0.034067	0.02344	0.009172
37.6	0.138627	0.089937	0.034466	0.024018	0.009066
37.8	0.139368	0.090504	0.034479	0.024523	0.009165
38	0.140011	0.091647	0.034772	0.024839	0.009405
38.2	0.140845	0.09237	0.03517	0.025565	0.009304
38.4	0.14158	0.092699	0.035238	0.025859	0.009543
38.6	0.141879	0.092776	0.035589	0.02559	0.009228
38.8	0.141936	0.092607	0.035747	0.025687	0.008927
39	0.142071	0.09234	0.036096	0.025483	0.008662
39.2	0.142643	0.092627	0.036683	0.025715	0.008868
39.4	0.142999	0.092918	0.037052	0.025914	0.008857
39.6	0.143806	0.093362	0.037534	0.026645	0.009372
39.8	0.144251	0.093306	0.037445	0.02645	0.008737
40	0.144878	0.093835	0.037801	0.026806	0.008929
40.2	0.145112	0.094519	0.038029	0.0264	0.008774
40.4	0.145123	0.094441	0.037636	0.026018	0.008519
40.6	0.14542	0.094468	0.037319	0.026347	0.007917
40.8	0.145418	0.094188	0.037203	0.026021	0.007524
41	0.145963	0.094844	0.037231	0.026766	0.007541
41.2	0.146206	0.095013	0.037004	0.026886	0.007538
41.4	0.146316	0.095463	0.036878	0.026749	0.007931
41.6	0.146716	0.096103	0.037113	0.026887	0.007519
41.8	0.14739	0.096917	0.037353	0.026939	0.007794
42	0.147848	0.097235	0.037377	0.026778	0.008256
42.2	0.147924	0.097384	0.037648	0.026832	0.008574
42.4	0.148458	0.097819	0.037769	0.027192	0.008688
42.6	0.148893	0.097947	0.037937	0.02695	0.008688
42.8	0.149466	0.098789	0.038494	0.027246	0.008827
43	0.149921	0.098746	0.039032	0.027484	0.009016
43.2	0.150088	0.099044	0.039243	0.027309	0.008794
43.4	0.150317	0.099492	0.039208	0.027434	0.008935
43.6	0.150784	0.09998	0.0394	0.027272	0.008997
43.8	0.150865	0.100149	0.039769	0.027175	0.008949
44	0.151043	0.100521	0.039889	0.027335	0.009166
44.2	0.15115	0.101011	0.040325	0.027521	0.008978
44.4	0.1514	0.100823	0.040329	0.027723	0.008838
44.6	0.151078	0.101016	0.040502	0.028183	0.008458
44.8	0.151018	0.101382	0.040914	0.028112	0.008361
45	0.151309	0.102023	0.041084	0.028778	0.008513
45.2	0.150811	0.10175	0.040693	0.028102	0.008446
45.4	0.151271	0.102296	0.041433	0.028407	0.009266
45.6	0.151974	0.102693	0.041884	0.028748	0.009166
45.8	0.152472	0.103153	0.042493	0.028781	0.009311
46	0.152333	0.103568	0.042469	0.028565	0.00929
46.2	0.153032	0.104008	0.043148	0.028866	0.009339
46.4	0.153634	0.104376	0.042999	0.028926	0.008834
46.6	0.153961	0.10419	0.04311	0.028375	0.008635
46.8	0.154243	0.104282	0.043342	0.028492	0.008584
47	0.154738	0.104235	0.043578	0.028596	0.008801
47.2	0.15518	0.104553	0.043383	0.028363	0.008603
47.4	0.155066	0.104215	0.042467	0.027883	0.007926
47.6	0.155491	0.10396	0.042413	0.02781	0.007667
47.8	0.155992	0.103981	0.042472	0.027806	0.00781
48	0.155826	0.103919	0.042235	0.027798	0.007525
48.2	0.156442	0.104054	0.042572	0.02796	0.007474
48.4	0.156454	0.104444	0.042996	0.028248	0.007901
48.6	0.156162	0.104435	0.043254	0.028117	0.008093
48.8	0.156241	0.104606	0.042807	0.028066	0.008105
49	0.155882	0.104684	0.042692	0.02774	0.008257
49.2	0.155486	0.10465	0.042773	0.027647	0.008616
49.4	0.156176	0.105322	0.043149	0.027991	0.009104
49.6	0.15617	0.106009	0.043551	0.027887	0.008904
49.8	0.156856	0.106934	0.044738	0.028364	0.009735
50	0.157356	0.10721	0.04518	0.028436	0.010305
50.2	0.157864	0.107314	0.045557	0.02861	0.010407
50.4	0.157815	0.107745	0.045528	0.028712	0.010947
50.6	0.158551	0.108089	0.045845	0.028971	0.01141
50.8	0.158722	0.10853	0.046099	0.029675	0.011322
51	0.159737	0.109076	0.046407	0.030127	0.011312
51.2	0.160086	0.109499	0.045998	0.030307	0.010759
51.4	0.160709	0.109225	0.045728	0.029649	0.010112
51.6	0.161693	0.109376	0.04606	0.029789	0.009964
51.8	0.162093	0.109699	0.045745	0.029521	0.009897
52	0.162492	0.109905	0.045857	0.029805	0.009881
52.2	0.163032	0.110348	0.046078	0.029862	0.009554
52.4	0.163078	0.111235	0.046621	0.030127	0.009651
52.6	0.163195	0.110968	0.046426	0.029749	0.008903
52.8	0.163277	0.111496	0.046023	0.029646	0.00834
53	0.163336	0.111921	0.046186	0.02946	0.008349
53.2	0.163438	0.112078	0.045973	0.029961	0.008498
53.4	0.163409	0.112019	0.045762	0.0299	0.007962
53.6	0.163891	0.112679	0.046685	0.030174	0.008288
53.8	0.164517	0.112946	0.047363	0.03099	0.009201
54	0.164044	0.112945	0.0475	0.03047	0.009127
54.2	0.163485	0.112911	0.047366	0.030643	0.009137
54.4	0.163593	0.113059	0.047387	0.030185	0.009174
54.6	0.164198	0.11334	0.047853	0.030546	0.009049
54.8	0.164314	0.11354	0.04846	0.030381	0.009123
55	0.165796	0.11441	0.049361	0.030917	0.009656
55.2	0.166232	0.115181	0.049832	0.031282	0.010099
55.4	0.166725	0.115029	0.04982	0.031673	0.010355
55.6	0.167136	0.115241	0.049449	0.031588	0.01004
55.8	0.167449	0.115876	0.049837	0.032073	0.010319
56	0.167488	0.116376	0.050208	0.032633	0.010764
56.2	0.167427	0.116912	0.050373	0.032689	0.01025
56.4	0.167351	0.117462	0.050377	0.032577	0.010043
56.6	0.16757	0.117941	0.050599	0.032653	0.010009
56.8	0.167513	0.118138	0.05047	0.032817	0.010147
57	0.167689	0.11795	0.050369	0.033342	0.010327
57.2	0.167504	0.118124	0.050285	0.033505	0.01032
57.4	0.167735	0.118192	0.050425	0.033679	0.010149
57.6	0.167997	0.118593	0.050446	0.033827	0.010918
57.8	0.168005	0.118332	0.050147	0.033658	0.010841
58	0.167574	0.117966	0.04965	0.032596	0.010373
58.2	0.167578	0.11731	0.049662	0.032577	0.010684
58.4	0.168256	0.117344	0.049731	0.032147	0.010823
58.6	0.168662	0.117401	0.049985	0.03263	0.011123
58.8	0.168852	0.11771	0.050336	0.032466	0.011778
59	0.169744	0.118472	0.050879	0.032934	0.012015
59.2	0.169545	0.118782	0.051196	0.033334	0.012038
59.4	0.169366	0.118796	0.051021	0.033612	0.011882
59.6	0.169903	0.119376	0.051464	0.033601	0.011535
59.8	0.169069	0.119409	0.051609	0.03359	0.011143
60	0.169264	0.120338	0.051935	0.033406	0.011789
60.2	0.169406	0.120385	0.051762	0.033012	0.011279
60.4	0.169433	0.12068	0.05138	0.033023	0.01127
60.6	0.169894	0.121709	0.051745	0.033528	0.011928
60.8	0.170035	0.12173	0.051835	0.033967	0.01226
61	0.170765	0.122517	0.052386	0.034379	0.012304
61.2	0.171107	0.123199	0.052385	0.034348	0.012409
61.4	0.171815	0.123359	0.052243	0.034544	0.012503
61.6	0.172377	0.123749	0.052295	0.034712	0.013246
61.8	0.173425	0.124176	0.052701	0.03502	0.013435
62	0.17349	0.124216	0.052861	0.034915	0.013343
62.2	0.17352	0.123964	0.052862	0.035239	0.013516
62.4	0.173922	0.123913	0.052526	0.035065	0.01305
62.6	0.173773	0.12427	0.052273	0.034635	0.012675
62.8	0.174076	0.124399	0.05289	0.034306	0.012744
63	0.174733	0.12485	0.053298	0.034315	0.012294
63.2	0.174318	0.125104	0.053965	0.034952	0.012198
63.4	0.174405	0.125249	0.054058	0.034943	0.012176
63.6	0.174498	0.125417	0.053915	0.0349	0.011688
63.8	0.174056	0.125087	0.053911	0.034573	0.011422
64	0.174777	0.125532	0.054339	0.034765	0.012016
64.2	0.175039	0.12544	0.054488	0.035249	0.01174
64.4	0.175325	0.126246	0.054971	0.035864	0.012231
64.6	0.176027	0.126975	0.055565	0.036294	0.012843
64.8	0.176137	0.126794	0.055597	0.036311	0.012784
65	0.176193	0.127639	0.055832	0.036364	0.012727
65.2	0.176291	0.127412	0.055374	0.036147	0.012768
65.4	0.176434	0.127583	0.055742	0.036275	0.012968
65.6	0.176529	0.127434	0.055867	0.036304	0.013304
65.8	0.176924	0.127534	0.056484	0.036566	0.013185
66	0.176648	0.127369	0.056582	0.036594	0.01253
66.2	0.176716	0.127014	0.056393	0.036647	0.012398
66.4	0.176898	0.126789	0.056264	0.03632	0.012095
66.6	0.176966	0.127244	0.056755	0.036317	0.012165
66.8	0.177254	0.12702	0.057376	0.036241	0.011872
67	0.177213	0.127161	0.057295	0.036134	0.011515
67.2	0.176831	0.127154	0.057573	0.036441	0.011612
67.4	0.177606	0.127909	0.057636	0.036754	0.011611
67.6	0.178202	0.128049	0.057883	0.037252	0.011628
67.8	0.178647	0.127896	0.058233	0.037261	0.011724
68	0.178858	0.128423	0.058459	0.037511	0.012328
68.2	0.179417	0.128796	0.058732	0.037931	0.01278
68.4	0.17925	0.129129	0.058482	0.037582	0.013167
68.6	0.179492	0.129312	0.057884	0.037242	0.013018
68.8	0.17902	0.129836	0.057444	0.037026	0.013031
69	0.179207	0.13091	0.058164	0.037532	0.013842
69.2	0.179283	0.130864	0.05798	0.037098	0.013692
69.4	0.179383	0.131528	0.058315	0.037233	0.013877
69.6	0.179655	0.131628	0.058249	0.037147	0.013938
69.8	0.180066	0.132271	0.058977	0.037286	0.013773
70	0.180358	0.132548	0.05928	0.037622	0.013928
70.2	0.180819	0.132926	0.059704	0.03809	0.014339
70.4	0.181004	0.133339	0.060019	0.038178	0.014669
70.6	0.180685	0.133279	0.060518	0.038424	0.014418
70.8	0.18109	0.13319	0.060465	0.038323	0.014022
71	0.181175	0.133523	0.060463	0.038434	0.014051
71.2	0.181227	0.133335	0.060474	0.038777	0.014165
71.4	0.18194	0.133676	0.060709	0.038914	0.014236
71.6	0.182393	0.133333	0.060939	0.038605	0.014226
71.8	0.182204	0.13307	0.060844	0.038462	0.013993
72	0.181898	0.132948	0.060948	0.038372	0.014026
72.2	0.182014	0.132451	0.060506	0.038169	0.013709
72.4	0.181489	0.132725	0.060665	0.03823	0.013641
72.6	0.181258	0.13324	0.060975	0.038566	0.013643
72.8	0.181269	0.133865	0.061838	0.039124	0.014387
73	0.181452	0.134304	0.062454	0.039409	0.01456
73.2	0.181212	0.13445	0.062064	0.03901	0.013958
73.4	0.181342	0.134611	0.061935	0.039173	0.014127
73.6	0.181383	0.134274	0.061984	0.038818	0.013667
73.8	0.181881	0.134972	0.062469	0.039308	0.013944
74	0.182236	0.135151	0.062697	0.039621	0.014028
74.2	0.182729	0.135757	0.062852	0.040039	0.014448
74.4	0.182957	0.13599	0.062801	0.039836	0.014334
74.6	0.18275	0.135526	0.062022	0.039474	0.013837
74.8	0.183447	0.135696	0.062035	0.039364	0.013922
75	0.183352	0.13585	0.061495	0.038691	0.013941
75.2	0.183499	0.13585	0.061574	0.03852	0.014224
75.4	0.183937	0.136906	0.061888	0.038371	0.014376
75.6	0.183796	0.137206	0.061908	0.038253	0.014054
75.8	0.183259	0.137242	0.062171	0.03851	0.014044
76	0.183333	0.137167	0.062173	0.0381	0.014128
76.2	0.183642	0.137745	0.062701	0.03821	0.014615
76.4	0.183229	0.138612	0.063083	0.038631	0.015087
76.6	0.183417	0.139576	0.064115	0.039051	0.015486
76.8	0.183328	0.139543	0.064423	0.039135	0.0155
77	0.183086	0.140035	0.064538	0.039529	0.015593
77.2	0.183107	0.140168	0.06469	0.040004	0.01546
77.4	0.183256	0.139862	0.064436	0.039842	0.015025
77.6	0.18386	0.139872	0.064784	0.040171	0.014724
77.8	0.184526	0.14064	0.065343	0.040859	0.014662
78	0.184639	0.140292	0.065399	0.040435	0.014132
78.2	0.184961	0.140622	0.065088	0.040636	0.014682
78.4	0.184813	0.140693	0.06478	0.040869	0.01448
78.6	0.184404	0.140125	0.06416	0.040505	0.0143
78.8	0.18447	0.140096	0.063932	0.040597	0.014398
79	0.184594	0.140347	0.063746	0.04066	0.014431
79.2	0.184726	0.140657	0.06405	0.041167	0.014777
79.4	0.184388	0.140921	0.063716	0.041106	0.014852
79.6	0.184125	0.140775	0.063638	0.040896	0.014793
79.8	0.184653	0.141081	0.064105	0.040989	0.01554
80	0.184594	0.14106	0.0639	0.040149	0.015529
80.2	0.184714	0.141993	0.064029	0.040294	0.015995
80.4	0.184784	0.142708	0.064274	0.04048	0.016339
80.6	0.184826	0.143218	0.064882	0.040625	0.016531
80.8	0.185335	0.143373	0.065337	0.041198	0.016785
81	0.185296	0.143904	0.065705	0.041246	0.016681
81.2	0.185895	0.144287	0.06627	0.041426	0.016713
81.4	0.186407	0.144177	0.066546	0.041238	0.016648
81.6	0.187107	0.144725	0.067201	0.041552	0.016667
81.8	0.186885	0.144897	0.067628	0.041694	0.016217
82	0.186443	0.144405	0.067487	0.041156	0.016214
82.2	0.186232	0.144447	0.067056	0.041291	0.016094
82.4	0.186156	0.144453	0.067324	0.041505	0.015873
82.6	0.185923	0.143709	0.066892	0.040857	0.014996
82.8	0.185791	0.143644	0.066512	0.040831	0.014417
83	0.186032	0.143445	0.066673	0.041108	0.014066
83.2	0.185905	0.143381	0.066378	0.041194	0.013703
83.4	0.185664	0.142995	0.065742	0.040716	0.013347
83.6	0.185785	0.142967	0.065597	0.040664	0.013158
83.8	0.185871	0.142871	0.065293	0.040571	0.013113
84	0.185534	0.14272	0.064921	0.040271	0.013012
84.2	0.186394	0.143196	0.065031	0.041361	0.013839
84.4	0.187109	0.143674	0.065374	0.042031	0.014623
84.6	0.18745	0.144218	0.065577	0.042785	0.015033
84.8	0.188349	0.144632	0.066372	0.043668	0.015287
85	0.188308	0.145327	0.066998	0.043838	0.015808
85.2	0.189012	0.146242	0.067727	0.044783	0.016848
85.4	0.189315	0.146184	0.067873	0.044979	0.016849
85.6	0.189474	0.146557	0.06827	0.045016	0.017187
85.8	0.189369	0.14626	0.068929	0.045314	0.017451
86	0.189515	0.146584	0.069425	0.045052	0.017792
86.2	0.189623	0.146669	0.06954	0.045032	0.017584
86.4	0.189565	0.146783	0.070282	0.045042	0.017877
86.6	0.189152	0.146684	0.070194	0.045106	0.017335
86.8	0.189205	0.147327	0.070699	0.045249	0.017543
87	0.188943	0.147541	0.070909	0.045159	0.017371
87.2	0.18878	0.147944	0.070919	0.045435	0.017184
87.4	0.18831	0.147812	0.070754	0.044942	0.017204
87.6	0.188208	0.147997	0.070984	0.045158	0.017457
87.8	0.187845	0.147746	0.070749	0.045141	0.017553
88	0.187634	0.147708	0.07069	0.045224	0.017739
88.2	0.187831	0.147984	0.070353	0.04574	0.017908
88.4	0.187694	0.147892	0.070062	0.045472	0.017497
88.6	0.187324	0.14758	0.069635	0.045319	0.016508
88.8	0.187288	0.147362	0.069255	0.045188	0.016429
89	0.18678	0.147546	0.069123	0.045015	0.016353
89.2	0.186805	0.147507	0.068577	0.044841	0.016347
89.4	0.187363	0.147501	0.068461	0.04505	0.016439
89.6	0.187065	0.147108	0.068327	0.04483	0.016344
89.8	0.187767	0.147618	0.068663	0.044896	0.016599
90	0.188106	0.147918	0.068644	0.044722	0.016791
90.2	0.188151	0.147628	0.06835	0.044673	0.016641
90.4	0.188317	0.14796	0.068543	0.04478	0.016763
90.6	0.188868	0.148332	0.069029	0.045108	0.01672
90.8	0.189376	0.148714	0.069526	0.044633	0.016901
91	0.189468	0.149195	0.069842	0.044742	0.017093
91.2	0.189878	0.149561	0.070411	0.044865	0.017612
91.4	0.189513	0.149648	0.070783	0.04473	0.017737
91.6	0.189682	0.149662	0.071158	0.044906	0.017941
91.8	0.190012	0.149434	0.071609	0.044819	0.018176
92	0.190263	0.149669	0.072206	0.044931	0.018415
92.2	0.190549	0.14981	0.072803	0.045558	0.018566
92.4	0.190624	0.149553	0.073359	0.045816	0.018607
92.6	0.190846	0.149447	0.073568	0.045969	0.018519
92.8	0.191091	0.149611	0.074102	0.046123	0.019177
93	0.190899	0.150001	0.074478	0.046081	0.019059
93.2	0.191702	0.150543	0.074676	0.046513	0.019413
93.4	0.19206	0.150993	0.07497	0.047075	0.019513
93.6	0.191527	0.151179	0.074514	0.046704	0.019035
93.8	0.191482	0.151766	0.074168	0.046409	0.018765
94	0.191129	0.151871	0.073597	0.046627	0.0186
94.2	0.191153	0.15228	0.073523	0.047059	0.018373
94.4	0.190963	0.152205	0.073716	0.046904	0.017873
94.6	0.190968	0.152197	0.073758	0.046317	0.017389
94.8	0.190808	0.152253	0.073283	0.046009	0.017354
95	0.1904	0.152735	0.073269	0.046079	0.017422
95.2	0.190272	0.153218	0.073565	0.046169	0.017685
95.4	0.18969	0.153351	0.073543	0.046577	0.017771
95.6	0.190158	0.15325	0.073907	0.046798	0.018071
95.8	0.190085	0.153495	0.074617	0.047257	0.018511
96	0.190269	0.154106	0.075464	0.048072	0.018827
96.2	0.190258	0.154018	0.075809	0.048479	0.018983
96.4	0.190938	0.154278	0.076273	0.048892	0.019519
96.6	0.191405	0.154401	0.076595	0.048878	0.019616
96.8	0.191559	0.153868	0.076585	0.04843	0.019378
97	0.191669	0.153763	0.07636	0.048523	0.018907
97.2	0.19224	0.153832	0.076382	0.048645	0.018723
97.4	0.192064	0.154197	0.076118	0.048656	0.018849
97.6	0.191499	0.153708	0.075023	0.048105	0.018153
97.8	0.19108	0.152973	0.074421	0.047724	0.01727
98	0.191723	0.153127	0.07475	0.048414	0.017565
98.2	0.191974	0.153036	0.074837	0.048563	0.017151
98.4	0.191614	0.152608	0.074629	0.047888	0.016525
98.6	0.19134	0.152474	0.074308	0.047459	0.01625
98.8	0.1913	0.152335	0.074364	0.047971	0.016347
99	0.191216	0.152286	0.074819	0.047801	0.016443
99.2	0.191141	0.152293	0.074943	0.047694	0.016527
99.4	0.190762	0.151806	0.075045	0.047695	0.016205
99.6	0.190804	0.151472	0.075229	0.047252	0.015914
99.8	0.19048	0.152118	0.075759	0.047457	0.01657
100	0.190676	0.152535	0.07598	0.047561	0.016999
100.2	0.1906	0.152955	0.076001	0.047519	0.017225
100.4	0.19106	0.153715	0.076415	0.047646	0.01753
100.6	0.190971	0.154021	0.076792	0.047196	0.017731
100.8	0.191151	0.154104	0.076787	0.046663	0.017783
101	0.191496	0.154945	0.076737	0.047045	0.018393
101.2	0.191586	0.155642	0.076806	0.046912	0.018836
101.4	0.191574	0.156199	0.076592	0.04729	0.019339
101.6	0.191571	0.155636	0.075903	0.047207	0.019075
101.8	0.192319	0.155958	0.075921	0.047699	0.019297
102	0.192846	0.156417	0.076303	0.048299	0.019646
102.2	0.193071	0.15661	0.076086	0.048323	0.019621
102.4	0.193387	0.156798	0.076103	0.048323	0.019409
102.6	0.193324	0.156183	0.075808	0.04819	0.019122
102.8	0.193828	0.155882	0.075893	0.048647	0.019311
103	0.194274	0.15608	0.076546	0.049028	0.019573
103.2	0.19434	0.1566	0.076908	0.04953	0.019667
103.4	0.194303	0.156373	0.077013	0.049623	0.019684
103.6	0.194441	0.15663	0.077584	0.050051	0.020335
103.8	0.19443	0.157025	0.078108	0.050615	0.020906
104	0.193875	0.156981	0.078043	0.050094	0.020446
104.2	0.193412	0.157032	0.078071	0.049891	0.020197
104.4	0.193325	0.15749	0.078597	0.049865	0.020664
104.6	0.192541	0.157824	0.0787	0.050024	0.020871
104.8	0.192012	0.158086	0.078849	0.049773	0.020967
105	0.191476	0.158187	0.078833	0.050081	0.020768
105.2	0.190692	0.157918	0.078593	0.049687	0.020392
105.4	0.190064	0.157603	0.078106	0.049791	0.02006
105.6	0.18979	0.157519	0.07769	0.049397	0.019818
105.8	0.190035	0.157514	0.077869	0.049605	0.020025
106	0.189622	0.157266	0.077414	0.048984	0.019354
106.2	0.189996	0.157484	0.077383	0.048952	0.019274
106.4	0.190152	0.157327	0.077127	0.04875	0.018748
106.6	0.190235	0.157121	0.076696	0.048589	0.018482
106.8	0.191156	0.15819	0.07768	0.049476	0.01904
107	0.191944	0.158991	0.078872	0.050157	0.019636
107.2	0.19254	0.159833	0.079473	0.05064	0.019975
107.4	0.192487	0.159724	0.079143	0.050307	0.019529
107.6	0.19301	0.159951	0.079903	0.05056	0.019843
107.8	0.193145	0.159841	0.08012	0.05	0.019452
108	0.193142	0.159791	0.080107	0.049306	0.019297
108.2	0.193508	0.160542	0.080576	0.049848	0.019897
108.4	0.194014	0.161072	0.081209	0.050488	0.020169
108.6	0.193646	0.160781	0.080839	0.050911	0.01982
108.8	0.193852	0.160625	0.081174	0.050832	0.019899
109	0.193925	0.160362	0.080845	0.050975	0.019909
109.2	0.193666	0.160186	0.0805	0.050638	0.019906
109.4	0.193491	0.160092	0.080641	0.050829	0.019884
109.6	0.193862	0.160272	0.080991	0.051219	0.02029
109.8	0.194278	0.159928	0.080819	0.051471	0.020551
110	0.194429	0.159707	0.080652	0.051297	0.01992
110.2	0.194629	0.159779	0.080626	0.051577	0.019898
110.4	0.194532	0.159745	0.080199	0.051432	0.01954
110.6	0.194851	0.160168	0.080317	0.05186	0.019421
110.8	0.195264	0.16088	0.081305	0.052369	0.020024
111	0.195247	0.161308	0.081577	0.052541	0.02041
111.2	0.195152	0.161997	0.081516	0.052975	0.02035
111.4	0.195152	0.162133	0.081139	0.052747	0.019889
111.6	0.195318	0.162421	0.081471	0.052821	0.020118
111.8	0.195106	0.162614	0.081416	0.052445	0.019742
112	0.195533	0.163032	0.081385	0.052622	0.020052
112.2	0.195457	0.164028	0.081344	0.053317	0.020165
112.4	0.195315	0.163745	0.080863	0.053645	0.019633
112.6	0.194848	0.163827	0.080135	0.053721	0.019752
112.8	0.195137	0.164008	0.080501	0.053602	0.020255
113	0.195825	0.164443	0.080969	0.053927	0.020667
113.2	0.195673	0.164258	0.081017	0.053943	0.020707
113.4	0.195546	0.163919	0.08143	0.053974	0.020811
113.6	0.196206	0.164399	0.082022	0.054299	0.020937
113.8	0.196772	0.164713	0.081954	0.054028	0.02109
114	0.196987	0.164502	0.081981	0.053821	0.02092
114.2	0.19682	0.164627	0.081713	0.053675	0.020846
114.4	0.19667	0.164587	0.082015	0.053566	0.020844
114.6	0.196523	0.164603	0.082317	0.053886	0.020836
114.8	0.19605	0.16443	0.082618	0.053962	0.020923
115	0.19547	0.164233	0.083062	0.05392	0.020982
115.2	0.194743	0.163778	0.08334	0.053962	0.020755
115.4	0.1943	0.163472	0.083382	0.053381	0.020615
115.6	0.19348	0.163254	0.082898	0.053213	0.020437
115.8	0.192918	0.163239	0.082712	0.052632	0.02018
116	0.192468	0.163146	0.082413	0.052263	0.020054
116.2	0.191629	0.1631	0.082098	0.051987	0.019667
116.4	0.191793	0.163001	0.082161	0.052039	0.01983
116.6	0.19214	0.163455	0.082449	0.052407	0.020445
116.8	0.192338	0.163397	0.083188	0.052691	0.020684
117	0.193318	0.163848	0.083533	0.053066	0.020928
117.2	0.193337	0.163529	0.083349	0.052726	0.020972
117.4	0.193954	0.163606	0.083673	0.052852	0.020911
117.6	0.195487	0.164406	0.084307	0.05336	0.021363
117.8	0.195865	0.164154	0.083789	0.053183	0.021314
118	0.19632	0.163838	0.083724	0.053138	0.021058
118.2	0.196269	0.163868	0.08348	0.05328	0.020698
118.4	0.196111	0.163742	0.083742	0.053118	0.020713
118.6	0.195816	0.163964	0.08366	0.053089	0.020345
118.8	0.195604	0.163774	0.083917	0.053192	0.020379
119	0.195084	0.163561	0.08411	0.052979	0.020623
119.2	0.195035	0.163931	0.084239	0.053232	0.020966
119.4	0.195208	0.163913	0.084209	0.053596	0.021358
119.6	0.195144	0.163965	0.084177	0.053708	0.021484
119.8	0.19478	0.164065	0.084146	0.0536	0.021553
120	0.194216	0.163397	0.083841	0.053205	0.020858
120.2	0.194475	0.163624	0.083848	0.053532	0.021112
120.4	0.194721	0.163814	0.084017	0.054204	0.021317
120.6	0.194564	0.164289	0.083776	0.054324	0.021236
120.8	0.194262	0.164003	0.083586	0.054232	0.020974
121	0.195248	0.16435	0.083444	0.05459	0.02083
121.2	0.195267	0.164158	0.08346	0.054525	0.02073
121.4	0.195858	0.163933	0.08331	0.055096	0.020592
121.6	0.196687	0.164412	0.083549	0.055434	0.020739
121.8	0.196536	0.164666	0.083146	0.055057	0.02037
122	0.196591	0.165153	0.083083	0.05513	0.02012
122.2	0.196528	0.165956	0.083067	0.055272	0.02032
122.4	0.196274	0.16648	0.083406	0.054929	0.020784
122.6	0.196203	0.167075	0.083527	0.055073	0.020844
122.8	0.196097	0.166777	0.083974	0.055436	0.021205
123	0.195917	0.166687	0.084016	0.055524	0.021431
123.2	0.196253	0.166971	0.085045	0.055976	0.021839
123.4	0.196069	0.166049	0.08513	0.055655	0.021281
123.6	0.195727	0.165755	0.085385	0.05553	0.021287
123.8	0.195567	0.165616	0.085079	0.055568	0.020836
124	0.195557	0.165288	0.08541	0.055381	0.020339
124.2	0.195452	0.165279	0.085631	0.055137	0.020231
124.4	0.195157	0.165161	0.085697	0.055238	0.020158
124.6	0.195593	0.165695	0.086222	0.055293	0.020555
124.8	0.196377	0.166025	0.087216	0.055955	0.020961
125	0.196942	0.166542	0.087647	0.056695	0.020892
125.2	0.197376	0.167148	0.088097	0.057211	0.021798
125.4	0.198072	0.167899	0.088409	0.05783	0.022258
125.6	0.198386	0.16853	0.088314	0.057917	0.022663
125.8	0.198407	0.169531	0.088103	0.058236	0.023248
126	0.19865	0.170027	0.087761	0.059016	0.023716
126.2	0.198609	0.170176	0.087347	0.059218	0.024405
126.4	0.198279	0.169735	0.086647	0.058701	0.024298
126.6	0.198726	0.169896	0.086835	0.059129	0.02474
126.8	0.199172	0.169864	0.087015	0.059261	0.025281
127	0.199271	0.170123	0.086682	0.059087	0.025419
127.2	0.199586	0.170233	0.086854	0.058747	0.025314
127.4	0.199627	0.170103	0.086349	0.058587	0.0249
127.6	0.199718	0.170493	0.086994	0.058693	0.025392
127.8	0.199493	0.170576	0.087277	0.058307	0.025252
128	0.199261	0.170166	0.087529	0.057971	0.02521
128.2	0.198749	0.170065	0.087668	0.05762	0.024936
128.4	0.198997	0.170336	0.088287	0.057923	0.025492
128.6	0.199386	0.170597	0.089243	0.057894	0.02528
128.8	0.199112	0.170777	0.089724	0.057926	0.025172
129	0.198457	0.170753	0.089771	0.05796	0.024937
129.2	0.198676	0.171218	0.090262	0.058351	0.025254
129.4	0.198292	0.170988	0.089964	0.057893	0.02483
129.6	0.198029	0.170791	0.089586	0.058058	0.024702
129.8	0.197432	0.170278	0.08884	0.057895	0.024356
130	0.197395	0.169716	0.088449	0.057959	0.024099
130.2	0.197293	0.168912	0.088069	0.057199	0.023368
130.4	0.197421	0.169034	0.088026	0.056846	0.023011
130.6	0.197807	0.169483	0.088227	0.056999	0.023527
130.8	0.197427	0.169127	0.087679	0.056793	0.023295
131	0.196821	0.169134	0.087424	0.056076	0.02266
131.2	0.196657	0.169143	0.087567	0.056193	0.022545
131.4	0.196571	0.169511	0.087742	0.056289	0.022616
131.6	0.196121	0.169718	0.088244	0.056168	0.02279
131.8	0.196084	0.169879	0.08843	0.056365	0.023076
132	0.19676	0.169901	0.088524	0.056626	0.023064
132.2	0.196954	0.17017	0.089001	0.056898	0.023205
132.4	0.197277	0.170125	0.089221	0.056845	0.023336
132.6	0.196664	0.170173	0.088993	0.056661	0.02256
132.8	0.196857	0.170811	0.089715	0.057443	0.0232
133	0.197458	0.171458	0.090285	0.058422	0.023576
133.2	0.198524	0.172005	0.090738	0.059287	0.023699
133.4	0.198396	0.171924	0.090777	0.059298	0.023951
133.6	0.198667	0.172073	0.091085	0.05946	0.024212
133.8	0.19879	0.171622	0.091027	0.059283	0.024002
134	0.199652	0.171774	0.09156	0.059654	0.024411
134.2	0.199826	0.171351	0.091255	0.059711	0.024191
134.4	0.199499	0.171709	0.091131	0.059998	0.02449
134.6	0.199298	0.171443	0.090285	0.060012	0.02462
134.8	0.198818	0.170892	0.089883	0.060032	0.024597
135	0.198558	0.171029	0.090061	0.059771	0.024824
135.2	0.198735	0.171491	0.090187	0.06018	0.025332
135.4	0.19862	0.171729	0.090138	0.05993	0.025298
135.6	0.198404	0.171727	0.090263	0.059883	0.02539
135.8	0.19872	0.171818	0.090487	0.060145	0.025664
136	0.198812	0.172121	0.090473	0.059831	0.025337
136.2	0.198554	0.172428	0.090626	0.059423	0.02533
136.4	0.198297	0.173126	0.090776	0.059256	0.025269
136.6	0.198024	0.173415	0.090646	0.059188	0.025169
136.8	0.198742	0.174082	0.09139	0.05955	0.025652
137	0.198794	0.174198	0.09153	0.059524	0.025437
137.2	0.19841	0.174141	0.091569	0.059462	0.024998
137.4	0.198132	0.174285	0.091705	0.0593	0.025182
137.6	0.198246	0.174231	0.091647	0.059199	0.025216
137.8	0.198229	0.173579	0.091471	0.059189	0.02454
138	0.198468	0.173013	0.091328	0.059581	0.024483
138.2	0.197694	0.172295	0.090532	0.059449	0.023679
138.4	0.197304	0.172163	0.09032	0.05924	0.023471
138.6	0.197085	0.171594	0.089623	0.059036	0.023575
138.8	0.197573	0.171812	0.089953	0.059102	0.023815
139	0.198132	0.172482	0.090436	0.059577	0.024266
139.2	0.198069	0.172763	0.090631	0.05948	0.024431
139.4	0.197759	0.172513	0.090724	0.059683	0.024361
139.6	0.198104	0.172748	0.09131	0.059977	0.024551
139.8	0.198029	0.172851	0.091449	0.060061	0.024531
140	0.197803	0.172836	0.091046	0.059375	0.023889
140.2	0.198256	0.173354	0.091469	0.059607	0.024456
140.4	0.198289	0.173465	0.091351	0.059575	0.024429
140.6	0.198749	0.173598	0.091205	0.059892	0.02502
140.8	0.198848	0.174197	0.09167	0.060099	0.0251
141	0.198434	0.174649	0.091952	0.060349	0.025013
141.2	0.197972	0.174829	0.091714	0.060462	0.024689
141.4	0.198664	0.175086	0.091875	0.060461	0.024787
141.6	0.198514	0.174591	0.091782	0.060047	0.024387
141.8	0.19855	0.174153	0.092099	0.060027	0.023826
142	0.198353	0.173837	0.091865	0.059744	0.023623
142.2	0.197864	0.173458	0.091108	0.059378	0.022671
142.4	0.197984	0.173838	0.091329	0.059254	0.022807
142.6	0.198441	0.173977	0.09121	0.059554	0.023074
142.8	0.19908	0.174494	0.091868	0.060153	0.023278
143	0.198716	0.17456	0.092213	0.060491	0.023498
143.2	0.19802	0.17395	0.092298	0.0602	0.023497
143.4	0.197794	0.173595	0.092086	0.060406	0.023364
143.6	0.197971	0.173462	0.092383	0.060339	0.023243
143.8	0.197733	0.173075	0.091997	0.06041	0.023146
144	0.197908	0.173223	0.092046	0.060852	0.023219
144.2	0.198755	0.173866	0.092778	0.061563	0.024271
144.4	0.198751	0.173882	0.092521	0.061639	0.024373
144.6	0.199109	0.174673	0.092762	0.062528	0.025432
144.8	0.199086	0.175379	0.093133	0.06274	0.025727
145	0.199345	0.175549	0.093716	0.063313	0.02612
145.2	0.199845	0.175452	0.093526	0.063171	0.025909
145.4	0.200322	0.17549	0.093863	0.063032	0.02627
145.6	0.200047	0.175292	0.0941	0.06264	0.026303
145.8	0.199832	0.175072	0.093988	0.062657	0.026027
146	0.199464	0.175115	0.093045	0.062086	0.0253
146.2	0.199719	0.175034	0.092655	0.062056	0.024767
146.4	0.19908	0.174926	0.092574	0.061516	0.024741
146.6	0.1984	0.174391	0.092088	0.060835	0.024159
146.8	0.197986	0.174033	0.092153	0.060725	0.02398
147	0.197605	0.173623	0.092161	0.060386	0.023718
147.2	0.197381	0.17325	0.092378	0.059692	0.023545
147.4	0.197575	0.173697	0.092593	0.060082	0.023679
147.6	0.197599	0.173828	0.092889	0.060326	0.023761
147.8	0.197847	0.174052	0.093209	0.060709	0.024262
148	0.198059	0.174476	0.093711	0.06114	0.024707
148.2	0.198338	0.174826	0.093977	0.061426	0.025141
148.4	0.198239	0.175328	0.093635	0.061644	0.025313
148.6	0.198644	0.175844	0.094064	0.062488	0.025999
148.8	0.199465	0.176421	0.094606	0.0625	0.026322
149	0.2001	0.176274	0.094944	0.062485	0.026606
149.2	0.199607	0.17644	0.094688	0.061729	0.026493
149.4	0.199987	0.177103	0.095291	0.061759	0.027205
149.6	0.200265	0.176904	0.095507	0.061653	0.027079
149.8	0.200779	0.177486	0.095595	0.062027	0.027328
150	0.201444	0.177993	0.095762	0.061786	0.027485
150.2	0.201589	0.178121	0.09582	0.061553	0.027863
150.4	0.200541	0.177405	0.095279	0.060777	0.027238
150.6	0.200455	0.177339	0.095162	0.061047	0.026983
150.8	0.200378	0.176671	0.09501	0.061647	0.026715
151	0.200175	0.176163	0.095039	0.061633	0.026236
151.2	0.199487	0.175769	0.094592	0.061633	0.025946
151.4	0.199492	0.175728	0.094408	0.062562	0.025913
151.6	0.198882	0.175246	0.094051	0.062612	0.025618
151.8	0.198724	0.175037	0.094058	0.062912	0.02561
152	0.198687	0.175374	0.094249	0.063559	0.026021
152.2	0.198502	0.175223	0.09413	0.064509	0.025896
152.4	0.197785	0.174684	0.093646	0.064251	0.025768
152.6	0.197811	0.174131	0.093783	0.064464	0.025974
152.8	0.197664	0.173982	0.093683	0.063882	0.025906
153	0.197304	0.173473	0.093391	0.063835	0.026041
153.2	0.196974	0.173213	0.093523	0.063681	0.026185
153.4	0.197467	0.173346	0.0938	0.063788	0.026224
153.6	0.197554	0.173108	0.093948	0.063461	0.025902
153.8	0.198396	0.173675	0.094736	0.063571	0.026726
154	0.19856	0.173776	0.094957	0.062994	0.027089
154.2	0.198953	0.174447	0.095544	0.063391	0.027575
154.4	0.198674	0.174468	0.095466	0.063462	0.026997
154.6	0.199062	0.175134	0.095882	0.064248	0.027503
154.8	0.198737	0.174835	0.095825	0.063762	0.026851
155	0.199071	0.1753	0.09644	0.063672	0.026871
155.2	0.199029	0.175553	0.09608	0.063596	0.026693
155.4	0.199757	0.176156	0.096763	0.063594	0.026495
155.6	0.20039	0.176987	0.097372	0.06411	0.027187
155.8	0.201139	0.177632	0.097934	0.064515	0.027579
156	0.201701	0.178365	0.098504	0.065032	0.028125
156.2	0.201686	0.178173	0.098504	0.065529	0.028123
156.4	0.201229	0.177977	0.098182	0.065029	0.028105
156.6	0.201475	0.178144	0.098208	0.065249	0.028061
156.8	0.201264	0.178112	0.097887	0.065365	0.027603
157	0.200943	0.177749	0.097379	0.065407	0.027253
157.2	0.200627	0.177484	0.097057	0.065324	0.027012
157.4	0.200093	0.177229	0.096558	0.065041	0.026486
157.6	0.20045	0.177335	0.096704	0.065188	0.026592
157.8	0.200462	0.176992	0.096754	0.06496	0.026703
158	0.200421	0.177219	0.096784	0.065351	0.026847
158.2	0.200279	0.177386	0.096827	0.06548	0.026935
158.4	0.199773	0.177301	0.09646	0.06524	0.026655
158.6	0.199486	0.177404	0.096484	0.065193	0.026801
158.8	0.199134	0.177221	0.096728	0.064966	0.026203
159	0.199158	0.177302	0.096743	0.064811	0.026197
159.2	0.199163	0.177049	0.096285	0.064633	0.026153
159.4	0.199816	0.177285	0.096751	0.064861	0.026314
159.6	0.200391	0.177632	0.09663	0.065082	0.027083
159.8	0.200709	0.177952	0.097005	0.064818	0.027017
160	0.200691	0.178341	0.09674	0.064565	0.027232
160.2	0.200711	0.178272	0.096786	0.064336	0.027333
160.4	0.200824	0.17843	0.096714	0.064175	0.027217
160.6	0.201192	0.178777	0.097213	0.064455	0.027458
160.8	0.201602	0.178988	0.097176	0.064857	0.027639
161	0.201475	0.178901	0.097084	0.064578	0.027789
161.2	0.201392	0.178926	0.097397	0.06472	0.028106
161.4	0.20099	0.178601	0.097582	0.064376	0.028203
161.6	0.20125	0.178743	0.098088	0.064524	0.028431
161.8	0.201094	0.179091	0.098035	0.064033	0.028353
162	0.201254	0.179471	0.098282	0.064446	0.028578
162.2	0.201061	0.179823	0.098341	0.064085	0.0287
162.4	0.200687	0.180122	0.098148	0.064132	0.028502
162.6	0.200341	0.180442	0.098461	0.064691	0.028667
162.8	0.200476	0.180212	0.098803	0.065179	0.028677
163	0.20039	0.180028	0.098717	0.06523	0.028605
163.2	0.200476	0.180025	0.09856	0.065651	0.028877
163.4	0.200788	0.180215	0.098554	0.065941	0.028986
163.6	0.20053	0.180431	0.097966	0.065872	0.02906
163.8	0.200664	0.180397	0.098587	0.066095	0.028893
164	0.200919	0.180164	0.098577	0.066307	0.028752
164.2	0.201084	0.179649	0.098307	0.066629	0.028456
164.4	0.201373	0.179567	0.09836	0.067205	0.028298
164.6	0.200929	0.179205	0.098244	0.067555	0.028022
164.8	0.201068	0.179084	0.098247	0.067677	0.028177
165	0.200543	0.178613	0.09849	0.067452	0.027968
165.2	0.200497	0.178509	0.098726	0.067737	0.028342
165.4	0.200335	0.178297	0.098381	0.067484	0.028333
165.6	0.200741	0.178925	0.09859	0.067954	0.028486
165.8	0.200741	0.179421	0.098264	0.06819	0.028265
166	0.200899	0.179466	0.098149	0.068242	0.028084
166.2	0.200679	0.179971	0.098179	0.06824	0.028311
166.4	0.200096	0.179965	0.097988	0.068182	0.028041
166.6	0.200543	0.180321	0.099102	0.068781	0.028745
166.8	0.200716	0.180271	0.099705	0.068914	0.028871
167	0.200877	0.180237	0.100213	0.068704	0.028897
167.2	0.200454	0.180178	0.099845	0.068377	0.028826
167.4	0.200369	0.179898	0.099879	0.068061	0.028487
167.6	0.199754	0.17967	0.099594	0.067674	0.028287
167.8	0.19992	0.179219	0.100119	0.067882	0.02796
168	0.19982	0.178866	0.0998	0.067892	0.027449
168.2	0.199433	0.178842	0.099405	0.067796	0.027126
168.4	0.199183	0.178825	0.09937	0.067334	0.026693
168.6	0.198987	0.178978	0.099378	0.067318	0.026592
168.8	0.198871	0.179001	0.099306	0.067198	0.026988
169	0.198291	0.178956	0.099061	0.066876	0.026903
169.2	0.198625	0.179251	0.098696	0.066967	0.027052
169.4	0.198773	0.179511	0.098299	0.067141	0.027017
169.6	0.199221	0.18017	0.098501	0.067616	0.027306
169.8	0.198769	0.179888	0.097932	0.066795	0.026986
170	0.198914	0.180118	0.097999	0.066323	0.0273
170.2	0.198666	0.180775	0.098508	0.066628	0.027756
170.4	0.198926	0.180508	0.098415	0.066706	0.027958
170.6	0.199793	0.180627	0.099172	0.067032	0.028572
170.8	0.200615	0.180983	0.099608	0.067434	0.028736
171	0.201043	0.180904	0.100116	0.067471	0.028886
171.2	0.201336	0.180838	0.100121	0.067567	0.02876
171.4	0.201366	0.180457	0.100158	0.06769	0.028495
171.6	0.201382	0.180381	0.10048	0.068295	0.028804
171.8	0.201608	0.179985	0.100542	0.068767	0.028521
172	0.201741	0.179798	0.100246	0.06834	0.028261
172.2	0.201979	0.180291	0.100711	0.068783	0.0287
172.4	0.202492	0.18055	0.100737	0.068767	0.028858
172.6	0.202544	0.18053	0.100987	0.069274	0.02877
172.8	0.201916	0.180213	0.100631	0.069158	0.029219
173	0.201828	0.180592	0.101155	0.068996	0.029353
173.2	0.202132	0.180798	0.101359	0.069521	0.029418
173.4	0.201617	0.180554	0.100878	0.069644	0.029324
173.6	0.201409	0.180247	0.101004	0.069219	0.029291
173.8	0.200814	0.179926	0.100625	0.068808	0.029504
174	0.200693	0.17969	0.100706	0.069009	0.029549
174.2	0.200438	0.180194	0.100822	0.069397	0.029563
174.4	0.200052	0.179978	0.10044	0.069282	0.029355
174.6	0.200738	0.181113	0.101032	0.069472	0.029539
174.8	0.20082	0.181459	0.101282	0.069539	0.029128
175	0.200665	0.181592	0.101678	0.069491	0.029255
175.2	0.200866	0.18171	0.101569	0.069631	0.028897
175.4	0.200067	0.181386	0.100771	0.069168	0.028326
175.6	0.200204	0.181563	0.100872	0.06936	0.028316
175.8	0.199962	0.181314	0.100348	0.068807	0.028082
176	0.200255	0.181338	0.100331	0.068607	0.027986
176.2	0.200789	0.181292	0.100511	0.068957	0.0281
176.4	0.201009	0.181261	0.100098	0.06843	0.028024
176.6	0.20101	0.180859	0.099901	0.068341	0.02758
176.8	0.200911	0.180917	0.10001	0.068693	0.028362
177	0.201306	0.181215	0.100292	0.068896	0.028326
177.2	0.200978	0.180648	0.099597	0.069115	0.02804
177.4	0.200976	0.180294	0.099874	0.069682	0.028621
177.6	0.201625	0.180464	0.100423	0.070017	0.029178
177.8	0.202068	0.180871	0.100983	0.070829	0.030203
178	0.202054	0.181311	0.101449	0.070855	0.030475
178.2	0.202005	0.182072	0.101863	0.071181	0.03094
178.4	0.201589	0.182109	0.101672	0.071176	0.030886
178.6	0.201743	0.182388	0.101529	0.070974	0.030802
178.8	0.201724	0.182358	0.101825	0.071203	0.031003
179	0.201429	0.182708	0.101958	0.071131	0.031432
179.2	0.201233	0.18221	0.101577	0.070895	0.031094
179.4	0.200392	0.181759	0.100942	0.07054	0.030771
179.6	0.200547	0.181665	0.101269	0.070751	0.030713
179.8	0.200072	0.181425	0.100963	0.070594	0.030598
180	0.199837	0.180591	0.10035	0.070065	0.029818
180.2	0.199193	0.179783	0.099503	0.069327	0.029508
180.4	0.198692	0.179475	0.099037	0.068674	0.02888
180.6	0.198373	0.178631	0.098612	0.068166	0.028216
180.8	0.198198	0.178908	0.098738	0.068528	0.028912
181	0.198012	0.17886	0.098697	0.068058	0.028762
181.2	0.197501	0.178707	0.098199	0.06804	0.028602
181.4	0.197324	0.178927	0.09887	0.068422	0.029106
181.6	0.197941	0.179573	0.099276	0.068769	0.029308
181.8	0.198327	0.179841	0.099822	0.069013	0.029766
182	0.198302	0.180221	0.099966	0.068895	0.029644
182.2	0.198658	0.180387	0.099962	0.069169	0.029882
182.4	0.198422	0.18093	0.099883	0.069276	0.030008
182.6	0.198613	0.181337	0.100096	0.06922	0.030108
182.8	0.19939	0.182365	0.100699	0.069652	0.030295
183	0.199225	0.18259	0.100983	0.06937	0.030222
183.2	0.199743	0.182539	0.101308	0.069953	0.030234
183.4	0.200106	0.182902	0.101949	0.070567	0.030608
183.6	0.200847	0.182763	0.102413	0.070926	0.03057
183.8	0.200524	0.182595	0.102389	0.070925	0.03059
184	0.200516	0.18188	0.102003	0.070501	0.030215
184.2	0.200072	0.18143	0.102034	0.070394	0.030306
184.4	0.200137	0.180851	0.102081	0.070082	0.029801
184.6	0.199945	0.180352	0.101736	0.069639	0.029886
184.8	0.19996	0.180423	0.101801	0.069604	0.029902
185	0.199332	0.179989	0.101364	0.069395	0.029349
185.2	0.199416	0.1797	0.101112	0.069436	0.029199
185.4	0.198834	0.178982	0.101256	0.069693	0.029163
185.6	0.199715	0.179481	0.1016	0.070343	0.029646
185.8	0.199679	0.179648	0.101304	0.070343	0.029739
186	0.199349	0.180076	0.101083	0.070235	0.029547
186.2	0.199208	0.180102	0.100506	0.070443	0.029953
186.4	0.199237	0.180705	0.10077	0.070853	0.030118
186.6	0.199554	0.181018	0.100713	0.070901	0.030273
186.8	0.200016	0.181782	0.100598	0.070806	0.030191
187	0.200025	0.182122	0.100636	0.070674	0.030534
187.2	0.200415	0.182632	0.10088	0.070758	0.030575
187.4	0.200534	0.182703	0.100994	0.070762	0.030385
187.6	0.200484	0.182983	0.100915	0.070696	0.030404
187.8	0.200047	0.183299	0.1007	0.070616	0.030368
188	0.199888	0.18329	0.100499	0.070588	0.030126
188.2	0.1995	0.183198	0.100798	0.070327	0.030266
188.4	0.199564	0.18277	0.100748	0.069773	0.029744
188.6	0.199468	0.182978	0.100639	0.069487	0.029775
188.8	0.199402	0.183185	0.101333	0.069716	0.029519
189	0.199315	0.183143	0.101939	0.070344	0.030262
189.2	0.199469	0.18265	0.102523	0.070469	0.030567
189.4	0.199428	0.182849	0.1029	0.070806	0.03058
189.6	0.200081	0.183248	0.10342	0.071052	0.030846
189.8	0.199843	0.182732	0.103541	0.071189	0.030595
190	0.199716	0.182559	0.103633	0.071231	0.030626
190.2	0.200218	0.182184	0.103613	0.071733	0.030678
190.4	0.200678	0.182544	0.104058	0.0718	0.030666
190.6	0.200566	0.182652	0.103744	0.071239	0.030487
190.8	0.200185	0.182406	0.103407	0.070749	0.029537
191	0.200236	0.183083	0.103545	0.070919	0.029559
191.2	0.200332	0.183251	0.1039	0.071212	0.029396
191.4	0.200486	0.183148	0.103389	0.071436	0.029059
191.6	0.199919	0.182968	0.103043	0.071005	0.029203
191.8	0.199668	0.182656	0.102572	0.070756	0.029105
192	0.199834	0.182556	0.102498	0.071014	0.029621
192.2	0.200214	0.182628	0.102801	0.070948	0.030353
192.4	0.200421	0.18205	0.102104	0.070804	0.030293
192.6	0.20067	0.182454	0.102129	0.071069	0.031042
192.8	0.201002	0.182696	0.102593	0.071443	0.031401
193	0.201073	0.182565	0.103112	0.071481	0.032277
193.2	0.200642	0.182009	0.103392	0.071309	0.032279
193.4	0.201284	0.182503	0.104011	0.071832	0.032481
193.6	0.201216	0.182274	0.104316	0.071734	0.03286
193.8	0.201327	0.182182	0.104113	0.071697	0.032463
194	0.201337	0.182707	0.104444	0.072042	0.032569
194.2	0.20099	0.182461	0.104235	0.071864	0.031832
194.4	0.200269	0.18294	0.104271	0.071711	0.031794
194.6	0.200077	0.183356	0.104598	0.071681	0.031632
194.8	0.19974	0.183411	0.104535	0.0719	0.03126
195	0.20026	0.184074	0.104577	0.072547	0.03155
195.2	0.200056	0.184015	0.10424	0.072589	0.031342
195.4	0.19959	0.183992	0.103632	0.072397	0.031002
195.6	0.199087	0.183794	0.103692	0.072051	0.031564
195.8	0.199517	0.183772	0.103614	0.072257	0.031694
196	0.200577	0.183898	0.10355	0.072883	0.031901
196.2	0.200533	0.183546	0.10309	0.072835	0.031495
196.4	0.200256	0.18266	0.101806	0.072021	0.030664
196.6	0.200383	0.182763	0.101974	0.071823	0.030474
196.8	0.200211	0.182395	0.101738	0.071514	0.029826
197	0.199661	0.181681	0.102132	0.071011	0.029635
197.2	0.199091	0.180974	0.102113	0.070687	0.029336
197.4	0.199646	0.181129	0.102384	0.070533	0.02921
197.6	0.199158	0.180851	0.102658	0.06993	0.02913
197.8	0.199305	0.181293	0.102945	0.070256	0.029084
198	0.198995	0.181472	0.10392	0.070797	0.029318
198.2	0.198857	0.181454	0.104149	0.070667	0.029368
198.4	0.199152	0.181902	0.104582	0.070735	0.029781
198.6	0.200015	0.182201	0.105006	0.071281	0.030419
198.8	0.200307	0.182692	0.105309	0.071938	0.030872
199	0.200529	0.182609	0.105108	0.071788	0.031003
199.2	0.200793	0.183138	0.105347	0.072172	0.03164
199.4	0.201131	0.182921	0.105118	0.072102	0.031773
199.6	0.201721	0.183017	0.105143	0.072461	0.032293
199.8	0.202189	0.183407	0.104669	0.072884	0.032033
200	0.202518	0.18342	0.104021	0.073356	0.03207
200.2	0.201959	0.183196	0.103401	0.07312	0.032113
200.4	0.202195	0.183125	0.102961	0.072978	0.032305
200.6	0.202103	0.18288	0.102886	0.072941	0.031948
200.8	0.201851	0.183068	0.102944	0.073221	0.032194
201	0.201498	0.182318	0.102583	0.072869	0.031868
201.2	0.201502	0.18261	0.102967	0.07322	0.032059
201.4	0.20184	0.183082	0.103194	0.073883	0.032155
201.6	0.201565	0.183737	0.103718	0.074337	0.032378
201.8	0.201798	0.184384	0.103882	0.075135	0.033034
202	0.201501	0.184165	0.104291	0.075262	0.03287
202.2	0.201525	0.184316	0.10406	0.07505	0.03279
202.4	0.201648	0.184772	0.10471	0.075467	0.032983
202.6	0.20157	0.185296	0.105026	0.075784	0.033364
202.8	0.201671	0.185442	0.105026	0.075337	0.033406
203	0.20153	0.185623	0.104688	0.074485	0.033255
203.2	0.201302	0.185453	0.104788	0.074393	0.033011
203.4	0.200875	0.185227	0.104125	0.073628	0.032428
203.6	0.200244	0.185241	0.103848	0.073534	0.032349
203.8	0.200277	0.185627	0.10401	0.073587	0.032668
204	0.199928	0.184656	0.103731	0.073158	0.032344
204.2	0.199997	0.184177	0.104042	0.072959	0.032631
204.4	0.199963	0.183555	0.103695	0.072758	0.032337
204.6	0.200246	0.183578	0.104023	0.072759	0.031974
204.8	0.200203	0.183709	0.10434	0.07327	0.032258
205	0.200498	0.183238	0.104286	0.073328	0.031736
205.2	0.201177	0.183922	0.105031	0.074376	0.032388
205.4	0.201458	0.183888	0.104792	0.074881	0.032468
205.6	0.201816	0.184537	0.105603	0.075606	0.033205
205.8	0.202058	0.185014	0.10575	0.076301	0.033652
206	0.201986	0.185183	0.106112	0.076222	0.033678
206.2	0.202231	0.185369	0.106006	0.076221	0.033909
206.4	0.202342	0.186012	0.106503	0.076839	0.034247
206.6	0.202494	0.185987	0.10615	0.076488	0.034453
206.8	0.20313	0.186712	0.106198	0.076763	0.034705
207	0.202509	0.186711	0.10639	0.076061	0.034328
207.2	0.202207	0.185946	0.106411	0.075112	0.033623
207.4	0.201845	0.185754	0.105593	0.074177	0.033131
207.6	0.201642	0.185394	0.105501	0.074027	0.033107
207.8	0.201505	0.184924	0.105526	0.073835	0.032759
208	0.201345	0.184168	0.10509	0.073169	0.031966
208.2	0.201624	0.18377	0.104475	0.072972	0.032056
208.4	0.201643	0.183319	0.104142	0.072575	0.031651
208.6	0.201967	0.183643	0.104204	0.073294	0.031588
208.8	0.201757	0.183013	0.103928	0.07294	0.031124
209	0.201777	0.182844	0.103889	0.072859	0.031364
209.2	0.202017	0.18264	0.10387	0.073173	0.031347
209.4	0.20173	0.182703	0.104072	0.073503	0.031335
209.6	0.202232	0.183365	0.104873	0.074274	0.031867
209.8	0.202598	0.183498	0.104939	0.074411	0.032148
210	0.202668	0.183665	0.1054	0.074876	0.032549
210.2	0.203311	0.184262	0.105684	0.075064	0.03296
210.4	0.203266	0.184729	0.10624	0.075311	0.033303
210.6	0.203616	0.184784	0.106681	0.075539	0.033908
210.8	0.203923	0.18538	0.106836	0.076097	0.034134
211	0.203596	0.185117	0.106978	0.07555	0.033823
211.2	0.20357	0.185165	0.107137	0.075501	0.033712
211.4	0.203007	0.18516	0.10644	0.075219	0.033804
211.6	0.202937	0.185248	0.106729	0.075491	0.034102
211.8	0.203102	0.185658	0.10651	0.075739	0.034087
212	0.203243	0.186197	0.106241	0.075984	0.034376
212.2	0.202948	0.185705	0.105594	0.075905	0.034321
212.4	0.202053	0.185236	0.105216	0.075872	0.034015
212.6	0.201728	0.185136	0.10495	0.076068	0.03385
212.8	0.201511	0.184876	0.105075	0.075777	0.033911
213	0.200906	0.184833	0.104877	0.076034	0.03413
213.2	0.201219	0.184825	0.104965	0.076296	0.03383
213.4	0.200861	0.184976	0.10498	0.076079	0.03418
213.6	0.201574	0.185464	0.105463	0.076195	0.034458
213.8	0.201577	0.185994	0.105634	0.075977	0.03473
214	0.201493	0.186002	0.105999	0.076097	0.034941
214.2	0.201522	0.185922	0.106365	0.075472	0.035095
214.4	0.200873	0.185282	0.106158	0.075482	0.034695
214.6	0.201325	0.185402	0.106694	0.076239	0.034954
214.8	0.201556	0.185816	0.106861	0.076626	0.034864
215	0.201218	0.185368	0.107105	0.075997	0.034533
215.2	0.201061	0.184896	0.107393	0.075596	0.034333
215.4	0.201123	0.184928	0.107262	0.07519	0.034261
215.6	0.20147	0.185083	0.107366	0.075818	0.03414
215.8	0.201846	0.185253	0.107265	0.075872	0.033962
216	0.201255	0.184583	0.107132	0.075487	0.033583
216.2	0.200999	0.18377	0.106983	0.075073	0.03299
216.4	0.200864	0.183524	0.106784	0.07525	0.03333
216.6	0.201082	0.183245	0.106583	0.075284	0.033156
216.8	0.201435	0.183626	0.106518	0.075906	0.033618
217	0.201655	0.183762	0.10627	0.0764	0.033681
217.2	0.201854	0.184006	0.106155	0.07646	0.033691
217.4	0.202155	0.184619	0.106382	0.076563	0.033941
217.6	0.202599	0.185342	0.10667	0.076992	0.034147
217.8	0.202123	0.185496	0.106648	0.07661	0.034075
218	0.202311	0.185503	0.107097	0.0772	0.034284
218.2	0.202497	0.185942	0.107672	0.077837	0.034411
218.4	0.202662	0.186149	0.10751	0.078256	0.034541
218.6	0.203187	0.187011	0.108431	0.078894	0.035327
218.8	0.202724	0.186542	0.108059	0.07841	0.035092
219	0.202262	0.186144	0.107879	0.077964	0.034739
219.2	0.202302	0.186423	0.108062	0.078199	0.034744
219.4	0.202439	0.186882	0.108098	0.078572	0.034991
219.6	0.20247	0.186598	0.1077	0.078648	0.034881
219.8	0.202715	0.186657	0.107766	0.078207	0.034918
220	0.202395	0.186552	0.107889	0.077777	0.034848
220.2	0.20256	0.186631	0.107784	0.07792	0.034878
220.4	0.20277	0.18682	0.107589	0.078518	0.035451
220.6	0.202291	0.186812	0.107113	0.078253	0.034858
220.8	0.202486	0.187315	0.107212	0.078688	0.035107
221	0.202029	0.187025	0.107151	0.078271	0.034859
221.2	0.201784	0.18731	0.107434	0.078443	0.035195
221.4	0.202091	0.187382	0.107693	0.078175	0.035425
221.6	0.2016	0.187218	0.107654	0.077627	0.035875
221.8	0.201634	0.187079	0.107621	0.077171	0.035921
222	0.201778	0.187068	0.107684	0.077422	0.03603
222.2	0.201907	0.187165	0.107555	0.07748	0.035853
222.4	0.201491	0.186711	0.107218	0.076808	0.035693
222.6	0.201543	0.186783	0.107246	0.076648	0.035505
222.8	0.201206	0.185874	0.10642	0.075991	0.034868
223	0.201178	0.185797	0.106448	0.075977	0.034568
223.2	0.201422	0.185973	0.106823	0.076171	0.03449
223.4	0.201716	0.185646	0.107002	0.07636	0.034365
223.6	0.201766	0.185021	0.106935	0.07605	0.033794
223.8	0.202293	0.185609	0.107678	0.076199	0.033783
224	0.202297	0.185005	0.107918	0.076081	0.033421
224.2	0.202756	0.18525	0.108272	0.07681	0.033477
224.4	0.20256	0.185252	0.108292	0.076629	0.032942
224.6	0.202007	0.185318	0.107998	0.076127	0.032273
224.8	0.202048	0.185588	0.10794	0.076286	0.032288
225	0.201592	0.185297	0.107978	0.075857	0.03212
225.2	0.201545	0.185438	0.107955	0.076457	0.032397
225.4	0.201873	0.185662	0.107945	0.076274	0.03252
225.6	0.201676	0.185919	0.108006	0.076353	0.032688
225.8	0.201702	0.186264	0.107521	0.076351	0.032636
226	0.20166	0.186652	0.107466	0.076678	0.032525
226.2	0.202173	0.187385	0.107769	0.077275	0.033163
226.4	0.202225	0.187256	0.108011	0.077196	0.033747
226.6	0.202306	0.187455	0.1076	0.077378	0.033864
226.8	0.202124	0.187104	0.107236	0.077368	0.033663
227	0.20227	0.186569	0.107435	0.077413	0.033386
227.2	0.202567	0.186523	0.107571	0.077623	0.03347
227.4	0.202542	0.185756	0.107639	0.077503	0.033465
227.6	0.20254	0.185516	0.107563	0.077145	0.033382
227.8	0.202753	0.185621	0.107942	0.077261	0.03369
228	0.202926	0.185184	0.107736	0.07737	0.033809
228.2	0.203323	0.18558	0.108114	0.077743	0.033862
228.4	0.202764	0.185237	0.107611	0.077403	0.033054
228.6	0.202757	0.185662	0.107611	0.077847	0.033347
228.8	0.202828	0.185513	0.107677	0.078014	0.033428
229	0.202026	0.184838	0.107272	0.077522	0.032763
229.2	0.201743	0.184733	0.106762	0.07742	0.032508
229.4	0.201643	0.185609	0.107254	0.077729	0.032675
229.6	0.201579	0.185492	0.1074	0.077746	0.032628
229.8	0.201248	0.186023	0.107111	0.077817	0.032963
230	0.201581	0.186504	0.107647	0.078313	0.033437
230.2	0.201385	0.186939	0.107795	0.078924	0.034199
230.4	0.201188	0.186883	0.107442	0.078908	0.034045
230.6	0.200981	0.186957	0.106907	0.078884	0.033671
230.8	0.201193	0.187131	0.107166	0.078902	0.033727
231	0.201376	0.186694	0.106984	0.078476	0.03351
231.2	0.201733	0.187236	0.107155	0.078529	0.034092
231.4	0.201845	0.187737	0.10717	0.078974	0.034326
231.6	0.201922	0.187838	0.10689	0.079282	0.034661
231.8	0.201896	0.188004	0.107198	0.0797	0.035125
232	0.202202	0.188225	0.107148	0.079635	0.035108
232.2	0.202108	0.188182	0.107601	0.079377	0.035
232.4	0.201294	0.187715	0.10761	0.078724	0.034809
232.6	0.201135	0.187598	0.10794	0.078742	0.035155
232.8	0.200813	0.186749	0.107876	0.078165	0.035272
233	0.200611	0.186494	0.107653	0.077616	0.034943
233.2	0.200579	0.185964	0.107294	0.077021	0.034524
233.4	0.200737	0.186645	0.107931	0.077822	0.034954
233.6	0.200947	0.186282	0.107562	0.077406	0.034686
233.8	0.200537	0.186226	0.107226	0.077194	0.034471
234	0.20066	0.186068	0.107501	0.077514	0.034603
234.2	0.200399	0.185779	0.107441	0.077748	0.034215
234.4	0.200865	0.18595	0.10758	0.077668	0.033921
234.6	0.201168	0.186377	0.108031	0.077755	0.034375
234.8	0.201459	0.187021	0.108519	0.078008	0.034927
235	0.202386	0.187431	0.108884	0.078217	0.034961
235.2	0.203613	0.188292	0.109416	0.079137	0.035602
235.4	0.203854	0.188483	0.109369	0.079783	0.035315
235.6	0.203896	0.188106	0.109306	0.079919	0.035498
235.8	0.203766	0.188225	0.10948	0.079957	0.035546
236	0.20372	0.188252	0.10955	0.079612	0.03529
236.2	0.203502	0.18787	0.109926	0.0798	0.035492
236.4	0.20299	0.187559	0.109912	0.079879	0.035428
236.6	0.203526	0.188175	0.110312	0.080615	0.035996
236.8	0.203374	0.18813	0.109979	0.080611	0.035782
237	0.203361	0.188256	0.109857	0.080629	0.035621
237.2	0.202994	0.188282	0.109555	0.080526	0.035316
237.4	0.202967	0.188958	0.109502	0.080961	0.03552
237.6	0.202142	0.18819	0.108493	0.079554	0.034533
237.8	0.201539	0.187751	0.108496	0.079022	0.034304
238	0.201083	0.187792	0.108358	0.078963	0.034244
238.2	0.200508	0.187461	0.108149	0.078252	0.033576
238.4	0.200239	0.187354	0.107846	0.077952	0.033336
238.6	0.199952	0.18718	0.107716	0.077487	0.033591
238.8	0.200461	0.186891	0.107696	0.076979	0.033204
239	0.200862	0.186546	0.107461	0.076896	0.032981
239.2	0.201725	0.186448	0.107308	0.07726	0.033439
239.4	0.201837	0.186299	0.107673	0.077422	0.033471
239.6	0.202301	0.186111	0.107893	0.077948	0.034178
239.8	0.202873	0.186439	0.108567	0.078672	0.034776
240	0.203221	0.186467	0.109124	0.079042	0.034879
240.2	0.203581	0.186215	0.109219	0.079437	0.034872
240.4	0.203877	0.187118	0.10945	0.079858	0.035271
240.6	0.204079	0.187349	0.109901	0.080373	0.035852
240.8	0.204021	0.187465	0.109962	0.08085	0.036053
241	0.204089	0.187762	0.110489	0.08129	0.03651
241.2	0.203908	0.187771	0.110271	0.081645	0.036171
241.4	0.203511	0.187899	0.110069	0.081566	0.035834
241.6	0.203214	0.188091	0.109966	0.081202	0.035455
241.8	0.202752	0.187997	0.109754	0.08134	0.035279
242	0.202389	0.187957	0.109289	0.08132	0.034812
242.2	0.201482	0.187367	0.108878	0.08094	0.034019
242.4	0.201123	0.187382	0.108414	0.081262	0.033749
242.6	0.201372	0.187791	0.108306	0.081235	0.033658
242.8	0.201943	0.188059	0.108391	0.081027	0.033428
243	0.201673	0.188038	0.107998	0.080845	0.03363
243.2	0.202178	0.188196	0.108443	0.080981	0.033703
243.4	0.202137	0.188188	0.108966	0.080781	0.033877
243.6	0.202027	0.188549	0.108702	0.081074	0.03409
243.8	0.202218	0.188483	0.109053	0.080648	0.033943
244	0.201543	0.187414	0.10891	0.079811	0.033308
244.2	0.201507	0.187096	0.108913	0.079153	0.033727
244.4	0.201613	0.187551	0.109383	0.079054	0.034515
244.6	0.20167	0.187131	0.109585	0.078986	0.034643
244.8	0.201955	0.187491	0.110062	0.078937	0.034917
245	0.20178	0.187018	0.110024	0.078683	0.034448
245.2	0.201651	0.186904	0.109852	0.078359	0.034112
245.4	0.201535	0.187021	0.109858	0.078105	0.034143
245.6	0.201816	0.186965	0.109675	0.078184	0.034547
245.8	0.201843	0.186716	0.109446	0.078362	0.034786
246	0.202095	0.186924	0.109488	0.078748	0.035223
246.2	0.201864	0.186483	0.109052	0.078752	0.035085
246.4	0.202381	0.186968	0.109062	0.079455	0.035561
246.6	0.202775	0.187253	0.10916	0.079461	0.035832
246.8	0.202909	0.186741	0.108952	0.079149	0.036027
247	0.202904	0.186674	0.108605	0.079301	0.036316
247.2	0.203161	0.18709	0.108624	0.079709	0.036104
247.4	0.202878	0.187211	0.108104	0.079786	0.035807
247.6	0.202714	0.187258	0.107873	0.080138	0.035418
247.8	0.202963	0.186954	0.107974	0.07974	0.035196
248	0.203135	0.187375	0.10828	0.079937	0.035378
248.2	0.203488	0.188254	0.108741	0.080014	0.035741
248.4	0.203701	0.189101	0.109169	0.080187	0.035622
248.6	0.203867	0.189335	0.10917	0.080308	0.035418
248.8	0.203823	0.189563	0.10952	0.080353	0.035272
249	0.203638	0.188988	0.109221	0.080339	0.034934
249.2	0.203207	0.189369	0.109364	0.080368	0.034636
249.4	0.20308	0.189085	0.109021	0.080245	0.034348
249.6	0.203574	0.189611	0.109529	0.080607	0.034983
249.8	0.203886	0.189428	0.110317	0.081197	0.035462
250	0.203377	0.189102	0.1101	0.08104	0.03538
250.2	0.202694	0.188202	0.109881	0.080647	0.035095
250.4	0.202848	0.188323	0.110239	0.081087	0.035523
250.6	0.202886	0.188295	0.110711	0.080996	0.035707
250.8	0.203154	0.188073	0.110733	0.080863	0.035463
251	0.203377	0.188714	0.111002	0.081246	0.035655
251.2	0.203116	0.18853	0.110637	0.081209	0.034777
251.4	0.202666	0.188135	0.110153	0.080937	0.034477
251.6	0.203012	0.188056	0.110423	0.081127	0.034792
251.8	0.203409	0.188323	0.110476	0.081	0.035022
252	0.203249	0.188482	0.110379	0.080883	0.035043
252.2	0.202931	0.187925	0.110421	0.080375	0.034702
252.4	0.202881	0.188048	0.110147	0.08048	0.035095
252.6	0.203144	0.187758	0.109778	0.080594	0.035155
252.8	0.202992	0.187725	0.10958	0.080493	0.034949
253	0.202964	0.187305	0.109197	0.080006	0.034705
253.2	0.203049	0.187472	0.10889	0.08022	0.034561
253.4	0.203364	0.187403	0.10846	0.080287	0.034829
253.6	0.203624	0.187353	0.109051	0.080701	0.035514
253.8	0.203791	0.187099	0.109233	0.080955	0.035961
254	0.203709	0.187605	0.108888	0.080971	0.036148
254.2	0.203955	0.187443	0.109	0.081247	0.0367
254.4	0.204464	0.188113	0.109253	0.081611	0.037126
254.6	0.204154	0.188367	0.109435	0.081741	0.037466
254.8	0.204203	0.188993	0.109739	0.082065	0.037418
255	0.203999	0.189189	0.109931	0.082354	0.037434
255.2	0.20383	0.189221	0.109618	0.082478	0.036976
255.4	0.203495	0.188918	0.109849	0.082446	0.037541
255.6	0.203431	0.18907	0.110048	0.082514	0.037478
255.8	0.20303	0.188836	0.109561	0.081604	0.037025
256	0.202395	0.188986	0.109497	0.08135	0.036515
256.2	0.20225	0.189069	0.109873	0.080885	0.036517
256.4	0.2019	0.18907	0.1098	0.080863	0.03649
256.6	0.201675	0.18877	0.109827	0.080126	0.03579
256.8	0.20137	0.189096	0.109965	0.08003	0.035904
257	0.201335	0.188611	0.109881	0.079426	0.035655
257.2	0.200941	0.188555	0.109195	0.079119	0.035395
257.4	0.201283	0.189329	0.109791	0.07923	0.035844
257.6	0.201402	0.189527	0.110244	0.079369	0.035979
257.8	0.201358	0.189722	0.110578	0.07959	0.036345
258	0.201407	0.189948	0.110354	0.080129	0.036317
258.2	0.201605	0.189902	0.109954	0.079886	0.036048
258.4	0.201706	0.190047	0.109674	0.079852	0.035915
258.6	0.201237	0.189354	0.109347	0.079995	0.035448
258.8	0.202059	0.189663	0.110049	0.080691	0.035583
259	0.202112	0.188927	0.109511	0.080618	0.034991
259.2	0.202381	0.188991	0.109751	0.081088	0.035065
259.4	0.202369	0.188638	0.110195	0.081357	0.035176
259.6	0.202746	0.188954	0.109985	0.081248	0.035085
259.8	0.20325	0.188936	0.110035	0.081573	0.035384
260	0.20372	0.189253	0.110746	0.082286	0.035893
260.2	0.203941	0.189067	0.110981	0.082491	0.036571
260.4	0.2037	0.188342	0.110749	0.08271	0.036591
260.6	0.203877	0.188536	0.110767	0.082664	0.037187
260.8	0.204212	0.189317	0.111568	0.083267	0.038192
261	0.204271	0.188881	0.111401	0.082665	0.037835
261.2	0.204162	0.189266	0.111225	0.082571	0.037846
261.4	0.204483	0.189642	0.111642	0.082981	0.038265
261.6	0.20368	0.189683	0.111811	0.083048	0.038273
261.8	0.20317	0.189018	0.11161	0.082513	0.037974
262	0.203195	0.188703	0.11126	0.08238	0.037521
262.2	0.203096	0.188388	0.110933	0.082009	0.037045
262.4	0.202784	0.187702	0.110835	0.082217	0.036885
262.6	0.202277	0.186979	0.110343	0.082092	0.036235
262.8	0.202307	0.186979	0.110345	0.082218	0.03618
263	0.201683	0.186989	0.10996	0.081817	0.03534
263.2	0.201345	0.187264	0.110057	0.081844	0.035292
263.4	0.201093	0.18699	0.109803	0.081814	0.035158
263.6	0.201402	0.187058	0.10972	0.082167	0.035546
263.8	0.201672	0.187412	0.109967	0.082864	0.036233
264	0.201527	0.187831	0.110217	0.082804	0.036381
264.2	0.201435	0.188186	0.109812	0.083031	0.036534
264.4	0.201574	0.188426	0.109622	0.083102	0.036662
264.6	0.202302	0.189491	0.110199	0.083384	0.037451
264.8	0.202759	0.190232	0.110501	0.083183	0.037398
265	0.203196	0.190032	0.110021	0.082936	0.037095
265.2	0.203362	0.190195	0.109974	0.082687	0.036916
265.4	0.203104	0.189921	0.109817	0.081877	0.036687
265.6	0.203563	0.190068	0.110154	0.081754	0.036993
265.8	0.203553	0.189583	0.110127	0.081249	0.036647
266	0.203533	0.189355	0.110539	0.081389	0.036501
266.2	0.203243	0.189088	0.1103	0.0817	0.03615
266.4	0.203226	0.188853	0.110224	0.081717	0.03613
266.6	0.203197	0.188809	0.110083	0.08132	0.035929
266.8	0.202959	0.188844	0.110623	0.08136	0.036022
267	0.202883	0.189182	0.110843	0.081352	0.035978
267.2	0.203434	0.188989	0.111156	0.081934	0.036245
267.4	0.203535	0.188814	0.111611	0.082307	0.03639
267.6	0.20352	0.189128	0.111883	0.082792	0.036614
267.8	0.203033	0.189058	0.111896	0.082696	0.036902
268	0.202901	0.188906	0.11208	0.083047	0.036667
268.2	0.202767	0.188787	0.111412	0.083143	0.03651
268.4	0.203109	0.188733	0.111535	0.083412	0.036531
268.6	0.203138	0.189141	0.111597	0.083471	0.03672
268.8	0.203959	0.189632	0.111901	0.083794	0.036573
269	0.204182	0.189491	0.111693	0.083545	0.036334
269.2	0.20374	0.189494	0.111153	0.082907	0.035482
269.4	0.203203	0.189381	0.110724	0.082096	0.035442
269.6	0.203428	0.189527	0.110515	0.081911	0.035669
269.8	0.20304	0.189355	0.110494	0.081512	0.035614
270	0.202697	0.189355	0.110385	0.081556	0.035644
270.2	0.202196	0.189113	0.109768	0.081399	0.035485
270.4	0.202844	0.189407	0.110079	0.081151	0.036206
270.6	0.203086	0.189944	0.11066	0.081156	0.03687
270.8	0.203121	0.190225	0.110949	0.081008	0.037484
271	0.203103	0.190515	0.110916	0.081418	0.037866
271.2	0.203567	0.190578	0.111719	0.081716	0.038648
271.4	0.202951	0.190242	0.111531	0.081867	0.038491
271.6	0.202466	0.189764	0.111253	0.082079	0.038701
271.8	0.202078	0.189384	0.111339	0.082533	0.039125
272	0.20227	0.188988	0.111743	0.083429	0.039151
272.2	0.202534	0.18911	0.111667	0.083794	0.038887
272.4	0.203053	0.189663	0.112479	0.084753	0.03901
272.6	0.202654	0.189547	0.112479	0.084771	0.039022
272.8	0.203351	0.189651	0.113079	0.08543	0.039185
273	0.202727	0.189139	0.112105	0.084665	0.038538
273.2	0.202382	0.189128	0.111717	0.084251	0.038089
273.4	0.203078	0.189472	0.112216	0.084401	0.03904
273.6	0.203464	0.189128	0.112255	0.084314	0.038921
273.8	0.203706	0.189716	0.112511	0.084301	0.038843
274	0.203463	0.189977	0.112508	0.084442	0.038827
274.2	0.20362	0.190177	0.112436	0.083886	0.038597
274.4	0.204303	0.190758	0.113321	0.083767	0.039174
274.6	0.203989	0.19083	0.113381	0.083	0.039153
274.8	0.203706	0.190413	0.112833	0.082195	0.038708
275	0.203574	0.19021	0.112805	0.082372	0.038443
275.2	0.203584	0.190008	0.112349	0.081578	0.037864
275.4	0.203118	0.189731	0.11178	0.08164	0.037306
275.6	0.202692	0.189561	0.111485	0.08153	0.037275
275.8	0.202503	0.189337	0.111288	0.081741	0.037108
276	0.202634	0.18868	0.111077	0.082138	0.036658
276.2	0.201957	0.188118	0.109928	0.081402	0.035913
276.4	0.201586	0.187826	0.109255	0.081365	0.035661
276.6	0.200717	0.187289	0.108271	0.081076	0.035559
276.8	0.201494	0.187721	0.10844	0.081185	0.035926
277	0.201354	0.187351	0.107333	0.080433	0.035504
277.2	0.201868	0.187715	0.107798	0.08091	0.035605
277.4	0.202977	0.188924	0.109016	0.082105	0.036631
277.6	0.203196	0.188959	0.109242	0.082097	0.036132
277.8	0.203495	0.189908	0.109888	0.082472	0.03657
278	0.203589	0.189995	0.110325	0.082978	0.036834
278.2	0.203904	0.190222	0.110806	0.082786	0.036857
278.4	0.203926	0.190205	0.111318	0.082755	0.037365
278.6	0.204154	0.189992	0.111423	0.082681	0.037372
278.8	0.204391	0.189989	0.11143	0.082811	0.037337
279	0.204297	0.190059	0.111879	0.08309	0.037661
279.2	0.204178	0.190153	0.111919	0.082654	0.037678
279.4	0.204175	0.190089	0.112376	0.082795	0.038238
279.6	0.203987	0.189364	0.112351	0.082957	0.038488
279.8	0.204078	0.189084	0.112428	0.083025	0.038382
280	0.203644	0.188686	0.112119	0.083079	0.038228
280.2	0.203049	0.188465	0.111437	0.082567	0.038013
280.4	0.203017	0.188815	0.11191	0.083209	0.038362
280.6	0.203124	0.189135	0.11223	0.083494	0.038148
280.8	0.203741	0.189321	0.11262	0.083658	0.038256
281	0.203293	0.188979	0.112348	0.083386	0.037674
281.2	0.203066	0.189349	0.112755	0.08406	0.037578
281.4	0.2036	0.189801	0.113183	0.083966	0.037644
281.6	0.203135	0.189168	0.112482	0.083872	0.037142
281.8	0.202952	0.189123	0.112172	0.08375	0.036852
282	0.202501	0.189042	0.111829	0.083087	0.036393
282.2	0.202345	0.189117	0.111371	0.082762	0.035953
282.4	0.202468	0.189565	0.111262	0.082948	0.036155
282.6	0.202612	0.189382	0.111154	0.082983	0.03598
282.8	0.203189	0.189917	0.110981	0.082915	0.036241
283	0.203127	0.190153	0.111201	0.082963	0.036639
283.2	0.203497	0.190617	0.111514	0.083018	0.037022
283.4	0.203976	0.190794	0.111926	0.083023	0.037453
283.6	0.203887	0.190451	0.111888	0.082995	0.037488
283.8	0.203991	0.191224	0.112146	0.083357	0.037684
284	0.204465	0.191532	0.112653	0.083887	0.038561
284.2	0.204693	0.191738	0.113091	0.084577	0.039279
284.4	0.205066	0.191854	0.113821	0.085267	0.039621
284.6	0.205617	0.191671	0.114105	0.08516	0.039474
284.8	0.205446	0.191355	0.114338	0.085157	0.039579
285	0.205731	0.191635	0.114428	0.08468	0.039723
285.2	0.205691	0.191443	0.114254	0.084518	0.039995
285.4	0.2057	0.190923	0.11394	0.083804	0.03964
285.6	0.205387	0.190592	0.113468	0.083965	0.039304
285.8	0.205447	0.190304	0.11304	0.083302	0.038784
286	0.204896	0.190486	0.112773	0.082724	0.038617
286.2	0.20488	0.190672	0.112405	0.082941	0.03854
286.4	0.204782	0.190486	0.112421	0.082961	0.038341
286.6	0.204307	0.190185	0.11208	0.082631	0.038226
286.8	0.204345	0.190798	0.112183	0.082586	0.038428
287	0.203657	0.190755	0.11248	0.082665	0.038509
287.2	0.203395	0.190989	0.11239	0.083067	0.038523
287.4	0.203594	0.191092	0.112157	0.083451	0.038596
287.6	0.20335	0.190844	0.111753	0.083757	0.038604
287.8	0.2034	0.191462	0.112286	0.084524	0.038937
288	0.203586	0.191425	0.112794	0.085027	0.03945
288.2	0.203375	0.191317	0.112971	0.085152	0.039205
288.4	0.203258	0.190904	0.11302	0.085278	0.038802
288.6	0.203565	0.190937	0.113444	0.0857	0.039026
288.8	0.203989	0.191336	0.113811	0.086265	0.039275
289	0.204564	0.192252	0.114328	0.086401	0.039989
289.2	0.204237	0.19168	0.113972	0.085847	0.039546
289.4	0.204173	0.191335	0.113437	0.085576	0.039201
289.6	0.204873	0.191773	0.113596	0.085902	0.039633
289.8	0.205216	0.19231	0.113673	0.085798	0.039861
290	0.20524	0.192824	0.113531	0.085416	0.039561
290.2	0.20527	0.19297	0.113081	0.085112	0.039353
290.4	0.205248	0.19295	0.113165	0.085048	0.039366
290.6	0.205793	0.193926	0.113584	0.085417	0.040067
290.8	0.20633	0.194338	0.113874	0.085699	0.040272
291	0.206641	0.194193	0.11401	0.086057	0.040331
291.2	0.206666	0.193895	0.113459	0.085851	0.04023
291.4	0.206592	0.193562	0.113404	0.085893	0.040104
291.6	0.20611	0.193118	0.113409	0.085417	0.040096
291.8	0.205656	0.192806	0.113875	0.085028	0.039948
292	0.204854	0.192103	0.113869	0.084588	0.039684
292.2	0.204875	0.191845	0.114305	0.084728	0.039779
292.4	0.204294	0.190908	0.114217	0.085168	0.039723
292.6	0.204016	0.190552	0.114441	0.085359	0.040023
292.8	0.203756	0.190372	0.114535	0.085449	0.039926
293	0.202921	0.190068	0.114818	0.08543	0.039851
293.2	0.202554	0.189572	0.114367	0.085271	0.039371
293.4	0.202267	0.189277	0.113523	0.084882	0.039404
293.6	0.202284	0.18938	0.113496	0.084909	0.039516
293.8	0.202531	0.189667	0.11327	0.085127	0.03964
294	0.202567	0.189976	0.112803	0.084972	0.039515
294.2	0.202881	0.190303	0.112356	0.084791	0.039842
294.4	0.203581	0.190726	0.112679	0.085037	0.040381
294.6	0.204282	0.191156	0.112855	0.085429	0.040625
294.8	0.204697	0.190592	0.112675	0.085522	0.040784
295	0.204511	0.190512	0.112529	0.085082	0.040571
295.2	0.204834	0.190368	0.112742	0.085238	0.040658
295.4	0.205187	0.19037	0.113081	0.08548	0.040655
295.6	0.205289	0.190172	0.113025	0.085123	0.040438
295.8	0.205069	0.189551	0.113058	0.084626	0.039843
296	0.204884	0.189613	0.113449	0.085302	0.039656
296.2	0.204989	0.189304	0.113645	0.085531	0.039488
296.4	0.204322	0.188553	0.113426	0.085371	0.03882
296.6	0.204039	0.188744	0.113659	0.085982	0.038868
296.8	0.203598	0.18887	0.113631	0.086314	0.038551
297	0.203025	0.18873	0.113725	0.086403	0.038455
297.2	0.20276	0.188483	0.113014	0.086115	0.037979
297.4	0.202493	0.188369	0.112661	0.085679	0.038226
297.6	0.202432	0.189032	0.113118	0.086094	0.038659
297.8	0.203113	0.190058	0.113382	0.086388	0.039214
298	0.202559	0.189924	0.112872	0.085562	0.039093
298.2	0.202758	0.190433	0.112719	0.085312	0.039245
298.4	0.203411	0.191207	0.113187	0.085459	0.039766
298.6	0.203329	0.191374	0.11321	0.085524	0.039885
298.8	0.203705	0.191267	0.113538	0.085622	0.039755
299	0.203317	0.192003	0.113624	0.085601	0.039302
299.2	0.203648	0.191895	0.113673	0.085763	0.039631
299.4	0.203705	0.191594	0.113399	0.085225	0.039227
299.6	0.203653	0.191413	0.113508	0.085424	0.039005
299.8	0.203881	0.191388	0.113936	0.085642	0.039079
300	0.204118	0.191735	0.114562	0.086787	0.03948
300.2	0.203648	0.191261	0.113907	0.086325	0.038907
300.4	0.203773	0.191285	0.113804	0.086933	0.039422
300.6	0.204009	0.19129	0.114295	0.087572	0.039932
300.8	0.203972	0.190948	0.114017	0.087558	0.039908
301	0.204261	0.190419	0.114162	0.087921	0.040022
301.2	0.203616	0.189888	0.113613	0.087219	0.039267
301.4	0.203575	0.19023	0.11368	0.087312	0.039861
301.6	0.203548	0.190472	0.113644	0.086994	0.04028
301.8	0.203879	0.190334	0.113585	0.08671	0.040435
302	0.203468	0.189474	0.112952	0.086142	0.040301
302.2	0.203854	0.19008	0.112783	0.086336	0.040215
302.4	0.203759	0.189789	0.112236	0.085859	0.040086
302.6	0.203389	0.189106	0.111641	0.085242	0.039327
302.8	0.203303	0.188689	0.111452	0.084921	0.039018
303	0.202957	0.18857	0.111132	0.084443	0.038875
303.2	0.202643	0.187795	0.110917	0.08371	0.038989
303.4	0.203163	0.188073	0.111442	0.083963	0.039249
303.6	0.203541	0.188563	0.11235	0.084486	0.039907
303.8	0.203845	0.189237	0.112619	0.084828	0.040189
304	0.203499	0.189643	0.112523	0.084811	0.039958
304.2	0.203484	0.189876	0.112794	0.084861	0.039993
304.4	0.204462	0.190613	0.113656	0.085628	0.041102
304.6	0.204775	0.19079	0.11447	0.085898	0.041196
304.8	0.205046	0.191335	0.114362	0.086197	0.04128
305	0.20492	0.191284	0.114567	0.085767	0.041052
305.2	0.204812	0.192001	0.114686	0.085703	0.041015
305.4	0.205296	0.192579	0.115147	0.08658	0.041592
305.6	0.205477	0.192621	0.115381	0.086704	0.041845
305.8	0.205832	0.192492	0.115154	0.087029	0.041938
306	0.205834	0.192443	0.114609	0.087213	0.041745
306.2	0.206015	0.192404	0.114037	0.086971	0.041245
306.4	0.205727	0.191949	0.11338	0.086311	0.041028
306.6	0.205931	0.191775	0.11305	0.086149	0.040879
306.8	0.205117	0.190995	0.112464	0.085857	0.040534
307	0.205291	0.190796	0.112284	0.085774	0.040616
307.2	0.204456	0.190405	0.112196	0.085867	0.040473
307.4	0.2045	0.190706	0.111644	0.085828	0.040156
307.6	0.204022	0.190494	0.111213	0.085574	0.039726
307.8	0.203424	0.190141	0.11075	0.085332	0.03924
308	0.202722	0.190042	0.110514	0.084755	0.039175
308.2	0.202544	0.190179	0.110668	0.085287	0.039597
308.4	0.202723	0.190769	0.110531	0.085283	0.040091
308.6	0.20225	0.19058	0.110397	0.084688	0.039942
308.8	0.202352	0.19094	0.11052	0.085041	0.040617
309	0.202482	0.190835	0.110683	0.08441	0.040594
309.2	0.202578	0.191107	0.110704	0.084586	0.040443
309.4	0.202726	0.191387	0.111147	0.084948	0.040714
309.6	0.202709	0.191682	0.111574	0.085115	0.040915
309.8	0.202928	0.191851	0.111724	0.085385	0.040915
310	0.203352	0.19198	0.11216	0.085497	0.040933
310.2	0.203783	0.191857	0.112678	0.085375	0.04067
310.4	0.203019	0.191335	0.112223	0.084796	0.040296
310.6	0.203362	0.191632	0.112373	0.085127	0.040368
310.8	0.203353	0.191354	0.112445	0.085375	0.040206
311	0.203603	0.191434	0.11284	0.085647	0.039982
311.2	0.203078	0.191289	0.112593	0.085562	0.039266
311.4	0.203137	0.191055	0.112196	0.08544	0.038699
311.6	0.202898	0.191047	0.112424	0.085833	0.038814
311.8	0.202593	0.190735	0.112641	0.085871	0.038837
312	0.202347	0.190655	0.11249	0.08596	0.038738
312.2	0.202386	0.190647	0.112498	0.086656	0.039058
312.4	0.202555	0.190506	0.112217	0.086291	0.039306
312.6	0.202397	0.189912	0.112065	0.08608	0.039286
312.8	0.202951	0.18994	0.112229	0.08651	0.04009
313	0.202772	0.189625	0.111838	0.085589	0.039755
313.2	0.202572	0.189831	0.112203	0.086102	0.0399
313.4	0.202389	0.190121	0.11254	0.086266	0.040626
313.6	0.201967	0.189777	0.112505	0.0863	0.040188
313.8	0.201372	0.189028	0.111803	0.085701	0.039852
314	0.201973	0.189145	0.111805	0.085729	0.040398
314.2	0.202449	0.189658	0.112237	0.085873	0.040776
314.4	0.202309	0.189598	0.11167	0.08542	0.040638
314.6	0.203001	0.189967	0.111684	0.085538	0.040752
314.8	0.203129	0.190059	0.111677	0.08556	0.04081
315	0.202936	0.190424	0.112138	0.085627	0.040819
315.2	0.203159	0.190801	0.112225	0.086185	0.040979
315.4	0.203423	0.191393	0.112546	0.086844	0.041353
315.6	0.203552	0.191816	0.112679	0.087416	0.041615
315.8	0.203908	0.191829	0.112913	0.087468	0.04186
316	0.203977	0.19165	0.11303	0.087526	0.041777
316.2	0.204245	0.191968	0.113322	0.088032	0.042044
316.4	0.203909	0.191253	0.112853	0.087402	0.041284
316.6	0.204285	0.19124	0.113348	0.087447	0.041049
316.8	0.20496	0.190976	0.114071	0.087504	0.0412
317	0.205366	0.191055	0.114618	0.087445	0.041213
317.2	0.205366	0.191087	0.115092	0.087661	0.041267
317.4	0.205256	0.191091	0.115077	0.087234	0.04092
317.6	0.205204	0.191055	0.115225	0.087372	0.040292
317.8	0.205347	0.19108	0.115315	0.087211	0.040353
318	0.206436	0.191823	0.116092	0.087652	0.041199
318.2	0.20683	0.191655	0.116395	0.087492	0.041082
318.4	0.207348	0.191668	0.116355	0.087488	0.040996
318.6	0.20752	0.191702	0.116545	0.087581	0.040819
318.8	0.20768	0.192208	0.116896	0.087964	0.041652
319	0.207088	0.19223	0.116956	0.08794	0.042059
319.2	0.207321	0.192189	0.116756	0.088275	0.042434
319.4	0.207667	0.192879	0.116923	0.088634	0.043109
319.6	0.207227	0.192558	0.1163	0.08822	0.043151
319.8	0.206929	0.192599	0.116198	0.087984	0.043353
320	0.206778	0.192733	0.116208	0.088197	0.043294
320.2	0.206243	0.192594	0.115752	0.088325	0.042892
320.4	0.205393	0.191583	0.114852	0.087483	0.041975
320.6	0.205799	0.191602	0.115054	0.08774	0.041904
320.8	0.205704	0.191208	0.115282	0.087929	0.041689
321	0.205461	0.190982	0.11502	0.087859	0.041536
321.2	0.204132	0.190385	0.113964	0.087043	0.040752
321.4	0.203414	0.190283	0.113323	0.08662	0.03986
321.6	0.203037	0.190469	0.113149	0.08655	0.039747
321.8	0.202823	0.190382	0.1131	0.086482	0.0398
322	0.203056	0.190429	0.113216	0.086273	0.040103
322.2	0.202968	0.190245	0.113083	0.085976	0.039898
322.4	0.20321	0.190816	0.113364	0.086413	0.040424
322.6	0.202652	0.19057	0.112879	0.086099	0.03988
322.8	0.202731	0.1909	0.113084	0.086051	0.040614
323	0.202363	0.19097	0.113114	0.085759	0.04069
323.2	0.202738	0.191109	0.113019	0.085937	0.040934
323.4	0.202565	0.191825	0.113255	0.08632	0.041511
323.6	0.202508	0.192161	0.113106	0.086442	0.041845
323.8	0.202938	0.192704	0.113735	0.087232	0.042677
324	0.203046	0.192988	0.113722	0.087518	0.042777
324.2	0.202629	0.192616	0.113393	0.087413	0.042408
324.4	0.202624	0.192635	0.113027	0.087123	0.042047
324.6	0.202878	0.192358	0.112819	0.087335	0.041992
324.8	0.203224	0.192435	0.112798	0.087432	0.042341
325	0.203424	0.192061	0.112714	0.087213	0.042166
325.2	0.203071	0.191872	0.112023	0.086526	0.041466
325.4	0.203406	0.191583	0.112219	0.086401	0.040799
325.6	0.203846	0.191613	0.112521	0.086583	0.040742
325.8	0.204333	0.191373	0.113026	0.086713	0.04099
326	0.204863	0.191561	0.113615	0.086783	0.041375
326.2	0.204731	0.191557	0.113698	0.086892	0.04129
326.4	0.20487	0.191187	0.113435	0.087038	0.040971
326.6	0.204757	0.191584	0.113697	0.087105	0.040797
326.8	0.204534	0.191689	0.113875	0.086744	0.040898
327	0.204623	0.192152	0.113717	0.086418	0.040967
327.2	0.20489	0.192224	0.113597	0.086844	0.041377
327.4	0.204832	0.192557	0.114157	0.087266	0.041868
327.6	0.205616	0.192972	0.114305	0.087441	0.041981
327.8	0.206179	0.193352	0.114842	0.088019	0.04243
328	0.205962	0.193083	0.114734	0.087879	0.041851
328.2	0.205936	0.19279	0.114244	0.087821	0.041415
328.4	0.205653	0.192391	0.113583	0.087703	0.040957
328.6	0.205881	0.192195	0.113296	0.087973	0.041163
328.8	0.206169	0.191984	0.113341	0.087856	0.04103
329	0.205688	0.191431	0.113305	0.087598	0.040427
329.2	0.205368	0.190904	0.11299	0.08755	0.039913
329.4	0.205538	0.190695	0.113182	0.087844	0.039855
329.6	0.205542	0.190835	0.113171	0.088378	0.040237
329.8	0.205917	0.191134	0.113717	0.088411	0.040862
330	0.205467	0.191449	0.113588	0.088588	0.041006
330.2	0.205227	0.191198	0.113315	0.0884	0.040944
330.4	0.205536	0.191725	0.113785	0.088593	0.041347
330.6	0.205099	0.192285	0.114073	0.088325	0.04162
330.8	0.204992	0.192326	0.113869	0.087633	0.041468
331	0.20566	0.192887	0.114502	0.088097	0.042368
331.2	0.205939	0.192876	0.114618	0.088621	0.042881
331.4	0.206072	0.193246	0.115372	0.088832	0.043105
331.6	0.206671	0.193458	0.115564	0.089119	0.042992
331.8	0.206836	0.193386	0.116045	0.089422	0.043586
332	0.206034	0.19221	0.115432	0.08824	0.042439
332.2	0.205308	0.191381	0.114909	0.087548	0.041842
332.4	0.205105	0.190762	0.114436	0.087364	0.041277
332.6	0.205053	0.190693	0.114263	0.087375	0.041149
332.8	0.204488	0.189779	0.113506	0.086459	0.040343
333	0.204124	0.189602	0.11327	0.086575	0.040332
333.2	0.203952	0.189387	0.112868	0.086835	0.039775
333.4	0.203888	0.189635	0.112847	0.086743	0.039824
333.6	0.204145	0.189916	0.113018	0.086911	0.039892
333.8	0.204247	0.19005	0.112947	0.086723	0.039714
334	0.204011	0.190134	0.112339	0.087031	0.039702
334.2	0.204364	0.190566	0.112486	0.0873	0.039932
334.4	0.204456	0.191368	0.112335	0.087614	0.040352
334.6	0.204084	0.19133	0.112297	0.087825	0.040624
334.8	0.204842	0.192608	0.113015	0.088769	0.041219
335	0.204814	0.192754	0.113243	0.089343	0.042107
335.2	0.204708	0.192998	0.113242	0.089106	0.042022
335.4	0.20464	0.193354	0.113611	0.08914	0.042097
335.6	0.204347	0.192987	0.113108	0.088538	0.042038
335.8	0.204592	0.193177	0.113586	0.088248	0.043028
336	0.204742	0.192771	0.113825	0.087887	0.042501
336.2	0.204389	0.192588	0.11364	0.087581	0.042481
336.4	0.204296	0.192502	0.113503	0.087486	0.042368
336.6	0.203452	0.191723	0.113151	0.086857	0.041886
336.8	0.202909	0.191218	0.112879	0.086213	0.041655
337	0.20291	0.191233	0.11375	0.086942	0.042083
337.2	0.202926	0.191651	0.114369	0.087573	0.042259
337.4	0.203483	0.192296	0.115394	0.08808	0.042656
337.6	0.203475	0.192179	0.115062	0.087939	0.042333
337.8	0.203933	0.19222	0.114888	0.088572	0.042591
338	0.204225	0.192978	0.114551	0.089155	0.042726
338.2	0.20435	0.19303	0.114601	0.089407	0.042841
338.4	0.204541	0.193627	0.114279	0.090001	0.042949
338.6	0.20479	0.193733	0.114818	0.09029	0.043033
338.8	0.205079	0.194099	0.115242	0.090446	0.042834
339	0.20457	0.19333	0.114626	0.089541	0.042428
339.2	0.205005	0.19337	0.114295	0.089239	0.042004
339.4	0.204976	0.193221	0.114028	0.088893	0.041924
339.6	0.205143	0.193136	0.114011	0.088637	0.041963
339.8	0.205747	0.193372	0.114424	0.088649	0.042082
340	0.205497	0.193309	0.1143	0.0882	0.04176
340.2	0.205015	0.193056	0.114083	0.087826	0.041516
340.4	0.204632	0.192799	0.114181	0.087714	0.041623
340.6	0.204552	0.192309	0.113987	0.087245	0.041482
340.8	0.20499	0.192637	0.114611	0.087592	0.042055
341	0.205165	0.192567	0.114874	0.088025	0.042086
341.2	0.205489	0.193282	0.115275	0.088295	0.042112
341.4	0.205784	0.193346	0.115014	0.08817	0.042169
341.6	0.205786	0.193078	0.11459	0.08852	0.042156
341.8	0.206547	0.193282	0.114529	0.089615	0.042723
342	0.20623	0.193126	0.113966	0.089358	0.04262
342.2	0.206376	0.192619	0.113846	0.08905	0.042806
342.4	0.206305	0.192898	0.113634	0.089413	0.042716
342.6	0.2062	0.192632	0.113668	0.088912	0.042583
342.8	0.20634	0.19235	0.113918	0.088711	0.042727
343	0.205976	0.191994	0.113152	0.088001	0.042363
343.2	0.206054	0.192098	0.112767	0.087961	0.042082
343.4	0.205282	0.191456	0.112455	0.087219	0.041316
343.6	0.20498	0.19148	0.112589	0.087014	0.041034
343.8	0.204677	0.191476	0.112552	0.086776	0.040661
344	0.204549	0.19183	0.113176	0.087081	0.040846
344.2	0.204427	0.191481	0.113435	0.086969	0.040618
344.4	0.203771	0.191336	0.113361	0.086868	0.040332
344.6	0.203961	0.191494	0.113254	0.086644	0.039991
344.8	0.203646	0.191635	0.113634	0.086974	0.040141
345	0.203259	0.191463	0.113069	0.087023	0.039975
345.2	0.203477	0.192184	0.113624	0.087359	0.040289
345.4	0.203083	0.191872	0.113218	0.087178	0.040293
345.6	0.203569	0.192351	0.113483	0.087736	0.040698
345.8	0.203683	0.192446	0.113406	0.087912	0.041312
346	0.204034	0.19257	0.113511	0.087676	0.041639
346.2	0.204191	0.192827	0.113904	0.087916	0.041595
346.4	0.203996	0.193144	0.113759	0.088322	0.041971
346.6	0.204292	0.193605	0.113836	0.088502	0.042362
346.8	0.204017	0.193351	0.113947	0.088515	0.042429
347	0.203718	0.193	0.113723	0.088358	0.042198
347.2	0.203856	0.19298	0.113619	0.088865	0.042178
347.4	0.203986	0.193164	0.114167	0.088988	0.042744
347.6	0.204166	0.193329	0.114791	0.089421	0.043038
347.8	0.204215	0.193373	0.115048	0.089903	0.042824
348	0.204356	0.19337	0.115575	0.090158	0.042743
348.2	0.204294	0.193006	0.115392	0.089893	0.042561
348.4	0.204234	0.193262	0.115068	0.089894	0.042424
348.6	0.204606	0.193266	0.115233	0.08984	0.042689
348.8	0.204115	0.192938	0.115446	0.089495	0.042885
349	0.204128	0.19247	0.114855	0.089048	0.04232
349.2	0.204752	0.192437	0.115352	0.088805	0.042296
349.4	0.204819	0.192107	0.115034	0.088653	0.042201
349.6	0.205154	0.192164	0.114836	0.088676	0.042063
349.8	0.20538	0.191982	0.114924	0.088867	0.042164
350	0.205658	0.19207	0.114375	0.088729	0.041951
350.2	0.204827	0.191984	0.113996	0.088814	0.041825
350.4	0.205081	0.192063	0.113569	0.088906	0.042471
350.6	0.205137	0.192198	0.11336	0.089495	0.042443
350.8	0.204986	0.191989	0.1133	0.08969	0.042517
351	0.205093	0.1919	0.11291	0.089687	0.042384
351.2	0.205616	0.192851	0.112939	0.090541	0.042913
351.4	0.205886	0.193093	0.113084	0.090658	0.043246
351.6	0.205572	0.192502	0.11284	0.090924	0.042502
351.8	0.205729	0.19292	0.112637	0.091037	0.042085
352	0.206195	0.192875	0.112527	0.090886	0.042175
352.2	0.205858	0.192954	0.11219	0.090563	0.042013
352.4	0.205318	0.192963	0.112006	0.090106	0.041808
352.6	0.205124	0.192499	0.112501	0.090067	0.042072
352.8	0.204597	0.191875	0.112411	0.089718	0.041483
353	0.204448	0.191585	0.112621	0.089805	0.041568
353.2	0.204357	0.191666	0.112818	0.089758	0.041696
353.4	0.203584	0.191455	0.112839	0.089276	0.041376
353.6	0.203354	0.191407	0.113376	0.089279	0.041495
353.8	0.203764	0.191732	0.11432	0.08971	0.042448
354	0.203844	0.191763	0.114732	0.089734	0.042934
354.2	0.203787	0.19201	0.115348	0.089893	0.043292
354.4	0.204546	0.192124	0.11576	0.090244	0.043996
354.6	0.204797	0.192499	0.115974	0.090921	0.044253
354.8	0.205171	0.192826	0.116223	0.091147	0.044437
355	0.205484	0.193033	0.11631	0.090899	0.044435
355.2	0.205756	0.192988	0.116378	0.09112	0.044837
355.4	0.205756	0.192595	0.115943	0.090858	0.044589
355.6	0.20617	0.192728	0.115875	0.090563	0.044788
355.8	0.20617	0.192974	0.115269	0.090169	0.044562
356	0.206613	0.193286	0.115196	0.090564	0.045155
356.2	0.205965	0.193506	0.114725	0.090344	0.044825
356.4	0.205858	0.193545	0.114753	0.090168	0.044604
356.6	0.205817	0.193235	0.114835	0.090451	0.044495
356.8	0.20556	0.193102	0.114696	0.090254	0.044093
357	0.205467	0.194035	0.11512	0.090638	0.04454
357.2	0.205407	0.194377	0.11514	0.090545	0.044026
357.4	0.205656	0.194479	0.115668	0.090754	0.044121
357.6	0.206185	0.195189	0.116353	0.091433	0.044468
357.8	0.206666	0.195532	0.116789	0.091561	0.044525
358	0.207	0.195757	0.117047	0.091604	0.044476
358.2	0.206996	0.19606	0.116978	0.09167	0.04441
358.4	0.206848	0.195826	0.116718	0.091592	0.04464
358.6	0.206587	0.1958	0.116519	0.0915	0.04465
358.8	0.20615	0.19551	0.116176	0.091058	0.044687
359	0.205571	0.19499	0.115711	0.090451	0.044834
359.2	0.20483	0.194419	0.115035	0.090039	0.044967
359.4	0.204397	0.194275	0.114615	0.0896	0.045245
359.6	0.203849	0.193953	0.114287	0.089126	0.045687
359.8	0.202876	0.193569	0.113705	0.088909	0.045642
360.01	0.202876	0.193569	0.113705	0.088909	0.045642
360.21	0.202442	0.193965	0.11402	0.088193	0.045795
360.41	0.20143	0.194016	0.113661	0.087295	0.045904
360.61	0.20053	0.194021	0.113785	0.086264	0.046106
360.81	0.199642	0.194033	0.113827	0.085692	0.046003
361.01	0.198327	0.19349	0.113786	0.08465	0.045877
361.21	0.196934	0.193275	0.113835	0.084128	0.045713
361.41	0.196052	0.192899	0.113796	0.083439	0.045539
361.61	0.194907	0.192134	0.113327	0.082652	0.045441
361.81	0.194316	0.191459	0.113104	0.082398	0.045421
362.01	0.193744	0.190457	0.112875	0.082466	0.045444
362.21	0.193331	0.189247	0.112376	0.08281	0.045342
362.41	0.193046	0.189007	0.112669	0.083163	0.04595
362.61	0.192508	0.1885	0.112495	0.083404	0.046224
362.81	0.191975	0.187916	0.112635	0.0836	0.046168
363.01	0.191347	0.187585	0.11276	0.083555	0.0462
363.21	0.190814	0.18689	0.112221	0.083474	0.045741
363.41	0.190036	0.186282	0.111917	0.083409	0.045658
363.61	0.189704	0.185893	0.111946	0.082961	0.045936
363.81	0.189831	0.185753	0.111922	0.08363	0.046158
364.01	0.189578	0.185206	0.112194	0.083723	0.046267
364.21	0.189262	0.185395	0.112628	0.084045	0.046708
364.41	0.188321	0.184913	0.11252	0.083967	0.046605
364.61	0.187632	0.184388	0.112516	0.084036	0.046089
364.81	0.18673	0.184342	0.112507	0.084254	0.045711
365.01	0.185646	0.183797	0.112313	0.083456	0.045251
365.21	0.185026	0.18391	0.11232	0.083474	0.045324
365.41	0.18491	0.183725	0.112151	0.083251	0.044953
365.61	0.184213	0.183556	0.111822	0.083246	0.044831
365.81	0.183936	0.18334	0.111624	0.083139	0.044996
366.01	0.183098	0.182583	0.111133	0.082908	0.044735
366.21	0.182139	0.182153	0.110495	0.08256	0.04448
366.41	0.181033	0.182104	0.110013	0.082018	0.043931
366.61	0.180495	0.182077	0.109675	0.081685	0.043729
366.81	0.180063	0.1819	0.10936	0.081248	0.043493
367.01	0.180018	0.181607	0.108868	0.080324	0.043594
367.21	0.179609	0.181198	0.108422	0.079588	0.043699
367.41	0.179391	0.180904	0.108254	0.079536	0.044037
367.61	0.179172	0.180344	0.107943	0.079321	0.043892
367.81	0.178691	0.18005	0.107685	0.079732	0.043881
368.01	0.178186	0.178999	0.107636	0.079428	0.043883
368.21	0.177719	0.178643	0.107816	0.079531	0.044022
368.41	0.177435	0.178033	0.107789	0.079655	0.043533
368.61	0.176816	0.177339	0.107377	0.079795	0.042964
368.81	0.176544	0.176992	0.107683	0.079654	0.043186
369.01	0.177016	0.176999	0.108068	0.079915	0.043679
369.21	0.177004	0.177183	0.108285	0.080537	0.044264
369.41	0.176853	0.177203	0.108209	0.080796	0.043885
369.61	0.176264	0.177523	0.108637	0.081225	0.044415
369.81	0.175501	0.176848	0.108275	0.081145	0.04472
370.01	0.174805	0.176266	0.107857	0.080819	0.044293
370.21	0.174074	0.176086	0.107154	0.080424	0.043791
370.41	0.173675	0.175798	0.106445	0.07983	0.043824
370.61	0.173784	0.175844	0.106264	0.079359	0.044304
370.81	0.173316	0.175243	0.105687	0.078973	0.043986
371.01	0.173092	0.17511	0.105437	0.078606	0.04407
371.21	0.172469	0.174828	0.105041	0.078533	0.044163
371.41	0.172439	0.174482	0.104523	0.078565	0.043775
371.61	0.172063	0.174261	0.104441	0.078615	0.043617
371.81	0.171375	0.173892	0.104409	0.07835	0.043422
372.01	0.171506	0.173317	0.104609	0.078591	0.043316
372.21	0.170697	0.172621	0.104692	0.078386	0.042593
372.41	0.170515	0.172099	0.104792	0.078749	0.042307
372.61	0.170275	0.171505	0.104617	0.078834	0.042089
372.81	0.170567	0.171462	0.104664	0.078912	0.042586
373.01	0.171073	0.172115	0.105099	0.079315	0.043372
373.21	0.170449	0.171685	0.104854	0.079359	0.043307
373.41	0.169865	0.171088	0.104632	0.079299	0.043044
373.61	0.169474	0.171513	0.105029	0.079904	0.043693
373.81	0.168974	0.170594	0.104358	0.079518	0.043236
374.01	0.168577	0.170255	0.103716	0.078916	0.042953
374.21	0.168201	0.169527	0.102966	0.078735	0.042894
374.41	0.167706	0.169283	0.102543	0.078308	0.043165
374.61	0.167323	0.168903	0.102312	0.077494	0.042914
374.81	0.16662	0.168156	0.101765	0.077504	0.042461
375.01	0.166298	0.167964	0.10144	0.076966	0.042368
375.21	0.16586	0.167746	0.101115	0.076815	0.042223
375.41	0.165329	0.167247	0.100791	0.076087	0.041786
375.61	0.165014	0.167594	0.101123	0.076285	0.04169
375.81	0.163901	0.166827	0.100982	0.075993	0.040893
376.01	0.163996	0.16652	0.10096	0.075914	0.040715
376.21	0.163673	0.166426	0.101175	0.075788	0.040578
376.41	0.163941	0.166465	0.10152	0.07591	0.041138
376.61	0.163891	0.166454	0.101521	0.075886	0.041446
376.81	0.163919	0.166307	0.101182	0.075769	0.041626
377.01	0.164196	0.16644	0.101821	0.076039	0.042068
377.21	0.163981	0.166196	0.10172	0.076868	0.042402
377.41	0.163757	0.165765	0.101602	0.076946	0.042404
377.61	0.163973	0.16638	0.102415	0.07747	0.042894
377.81	0.163653	0.165641	0.102151	0.07762	0.042868
378.01	0.163001	0.165234	0.101718	0.077765	0.043219
378.21	0.162185	0.164342	0.101113	0.077694	0.043084
378.41	0.161708	0.164166	0.100667	0.07738	0.04296
378.61	0.161237	0.16306	0.099833	0.076399	0.042679
378.81	0.160359	0.16254	0.0991	0.076163	0.042116
379.01	0.159937	0.162057	0.098749	0.075443	0.041649
379.21	0.159658	0.162339	0.098455	0.07538	0.041808
379.41	0.159426	0.161772	0.098208	0.074924	0.041699
379.61	0.15974	0.162108	0.098595	0.075423	0.041858
379.81	0.15909	0.161012	0.097923	0.074691	0.041263
380.01	0.159265	0.161173	0.097988	0.074332	0.041593
380.21	0.159106	0.161236	0.098625	0.074715	0.041901
380.41	0.158959	0.160831	0.09889	0.074782	0.042279
380.61	0.158209	0.160405	0.098276	0.075017	0.042034
380.81	0.15826	0.160686	0.098702	0.075375	0.042582
381.01	0.157953	0.160697	0.099134	0.07543	0.042958
381.21	0.157565	0.160457	0.099238	0.075626	0.043301
381.41	0.157047	0.159771	0.099307	0.075304	0.043364
381.61	0.156636	0.159574	0.099679	0.075468	0.043461
381.81	0.155502	0.158844	0.098819	0.075404	0.043233
382.01	0.155258	0.158655	0.09854	0.075485	0.043232
382.21	0.154843	0.158895	0.098314	0.075505	0.042891
382.41	0.154581	0.158798	0.09804	0.075469	0.042775
382.61	0.15378	0.158306	0.097279	0.074377	0.042035
382.81	0.153372	0.158317	0.097	0.074014	0.041617
383.01	0.153334	0.158189	0.096851	0.0738	0.041364
383.21	0.153829	0.158887	0.097323	0.074033	0.041836
383.41	0.154477	0.158624	0.0974	0.074659	0.041921
383.61	0.154682	0.158524	0.097152	0.074789	0.041873
383.81	0.154546	0.158245	0.096344	0.074605	0.041067
384.01	0.154482	0.15892	0.096355	0.075132	0.041289
384.21	0.154598	0.158967	0.096325	0.075402	0.041383
384.41	0.154454	0.159081	0.096489	0.07596	0.041713
384.61	0.153996	0.15949	0.096146	0.075981	0.041599
384.81	0.153835	0.159192	0.095996	0.075516	0.041675
385.01	0.153259	0.158151	0.095442	0.074376	0.041009
385.21	0.153611	0.158167	0.095574	0.074351	0.041304
385.41	0.153109	0.15754	0.095548	0.074328	0.040927
385.61	0.152832	0.157008	0.095529	0.074089	0.040528
385.81	0.152261	0.156587	0.095204	0.07356	0.040412
386.01	0.152675	0.15709	0.095497	0.074141	0.041041
386.21	0.1518	0.157068	0.095608	0.073815	0.040959
386.41	0.15052	0.156466	0.095309	0.073197	0.040806
386.61	0.149545	0.155638	0.095001	0.07238	0.040556
386.81	0.149486	0.155644	0.095354	0.072755	0.041048
387.01	0.149442	0.155396	0.09594	0.072827	0.041452
387.21	0.149542	0.155288	0.09639	0.072902	0.041836
387.41	0.149794	0.154848	0.096013	0.073297	0.04197
387.61	0.149846	0.154719	0.095935	0.073651	0.042021
387.81	0.150028	0.154942	0.095857	0.073892	0.041938
388.01	0.149941	0.155103	0.096058	0.074516	0.042553
388.21	0.150408	0.155031	0.096297	0.074482	0.042891
388.41	0.150489	0.155157	0.096409	0.074972	0.04322
388.61	0.150222	0.154773	0.096024	0.074465	0.04278
388.81	0.150285	0.154477	0.09585	0.074289	0.042597
389.01	0.150042	0.154165	0.095526	0.073902	0.0422
389.21	0.150111	0.154071	0.095441	0.073869	0.042394
389.41	0.149261	0.153392	0.09496	0.073442	0.04198
389.61	0.149244	0.153342	0.094364	0.073253	0.041751
389.81	0.148395	0.15306	0.093971	0.072572	0.041383
390.01	0.148287	0.153271	0.094123	0.072768	0.041294
390.21	0.147281	0.153064	0.093873	0.072086	0.040804
390.41	0.14695	0.153095	0.093615	0.072243	0.04079
390.61	0.14691	0.152517	0.093734	0.072628	0.040681
390.81	0.146871	0.152598	0.093492	0.073136	0.040705
391.01	0.146699	0.152265	0.093517	0.07306	0.040339
391.21	0.146458	0.15209	0.09328	0.072775	0.039849
391.41	0.146742	0.15213	0.093241	0.073214	0.040124
391.61	0.146154	0.151697	0.093079	0.073102	0.039752
391.81	0.145738	0.151303	0.092721	0.072369	0.039625
392.01	0.145415	0.151499	0.092625	0.072425	0.039819
392.21	0.145011	0.151119	0.092367	0.071441	0.039606
392.41	0.144398	0.151002	0.0922	0.071774	0.039593
392.61	0.144106	0.150819	0.09227	0.071688	0.03936
392.81	0.144229	0.150768	0.091998	0.071716	0.039194
393.01	0.143677	0.150013	0.091296	0.071771	0.038916
393.21	0.143392	0.150027	0.091336	0.072069	0.03913
393.41	0.143027	0.150031	0.091083	0.071966	0.038761
393.61	0.143034	0.150325	0.091125	0.072125	0.038537
393.81	0.142412	0.149921	0.091136	0.071663	0.038459
394.01	0.142452	0.149732	0.091331	0.071482	0.038204
394.21	0.142437	0.150214	0.091337	0.072066	0.038662
394.41	0.142939	0.150306	0.091399	0.072881	0.038979
394.61	0.142328	0.149767	0.09089	0.072408	0.038495
394.81	0.142048	0.149801	0.090332	0.072267	0.038619
395.01	0.142342	0.149906	0.090269	0.071799	0.038746
395.21	0.142478	0.149974	0.090052	0.071196	0.039046
395.41	0.143008	0.149945	0.090265	0.071444	0.03998
395.61	0.142391	0.149133	0.089733	0.070678	0.039752
395.81	0.142558	0.149104	0.089451	0.070459	0.040321
396.01	0.142431	0.149048	0.089316	0.07066	0.040338
396.21	0.142105	0.148073	0.089306	0.070495	0.040008
396.41	0.142234	0.147796	0.089675	0.071162	0.040286
396.61	0.141759	0.147189	0.08938	0.070992	0.039946
396.81	0.141332	0.146585	0.08935	0.070846	0.039537
397.01	0.140702	0.146318	0.089299	0.071187	0.039603
397.21	0.140546	0.146476	0.089669	0.071237	0.039931
397.41	0.140369	0.146097	0.08944	0.071	0.039948
397.61	0.140561	0.146624	0.089611	0.071615	0.040316
397.81	0.140135	0.14632	0.089657	0.071536	0.040257
398.01	0.140011	0.146309	0.089776	0.071291	0.040096
398.21	0.139687	0.146388	0.089357	0.071447	0.040021
398.41	0.139224	0.14594	0.088667	0.070826	0.039337
398.61	0.138832	0.146073	0.088279	0.070318	0.039045
398.81	0.139556	0.146557	0.088748	0.070794	0.039526
399.01	0.139946	0.146775	0.088581	0.070695	0.039346
399.21	0.140333	0.147413	0.089098	0.070696	0.039463
399.41	0.140517	0.146972	0.089086	0.070411	0.039563
399.61	0.140331	0.146609	0.088949	0.070114	0.039289
[truncated: 1,601 more rows]

## Sheet: B (right)
time	20 uM	10 uM	5 uM	2.5 uM	1.25 uM
0	0.0363015	0.0175579	0.0128792	0.00942272	0.00442284
0.2	0.0418022	0.0216687	0.0150606	0.0109574	0.0052246
0.4	0.0476502	0.0262177	0.0173946	0.0119633	0.00571564
0.6	0.0542259	0.0306785	0.0198182	0.0128266	0.00592011
0.8	0.0616628	0.0361394	0.0225062	0.0141254	0.00643705
1	0.0696913	0.0424419	0.0256861	0.015699	0.00723567
1.2	0.0782144	0.0486266	0.0291769	0.0174569	0.00801484
1.4	0.0866136	0.0548462	0.0328138	0.0193156	0.00899312
1.6	0.0952752	0.0612287	0.0365081	0.0216662	0.0100811
1.8	0.103319	0.067155	0.0397847	0.0235908	0.0110028
2	0.110863	0.072903	0.0432905	0.0259516	0.0122933
2.2	0.11735	0.0774669	0.0461892	0.0278023	0.0128154
2.4	0.1236	0.0821191	0.0488896	0.02996	0.013901
2.6	0.130088	0.086829	0.0517916	0.0317859	0.0150781
2.8	0.135638	0.0907986	0.0541918	0.0330061	0.0154298
3	0.14158	0.0950677	0.0569511	0.0345701	0.0164558
3.2	0.147082	0.0988957	0.0600193	0.0365187	0.0171817
3.4	0.152589	0.103193	0.0632794	0.0387812	0.0188484
3.6	0.157665	0.107388	0.0663919	0.0407917	0.0199873
3.8	0.161831	0.111148	0.068474	0.0423519	0.0204602
4	0.165459	0.11497	0.0707222	0.0437461	0.0210575
4.2	0.169439	0.118437	0.0728652	0.0455839	0.0217929
4.4	0.172413	0.120984	0.0749029	0.0459033	0.0214322
4.6	0.17574	0.123755	0.0770642	0.0466893	0.0215953
4.8	0.179011	0.127402	0.0793226	0.04835	0.0224981
5	0.181801	0.130348	0.0813949	0.0495579	0.0231291
5.2	0.184854	0.132768	0.0836255	0.0506458	0.0237412
5.4	0.187269	0.135028	0.0852692	0.0513919	0.024206
5.6	0.189981	0.137477	0.0870932	0.0526807	0.0247338
5.8	0.192121	0.139185	0.0880399	0.0532102	0.0248499
6	0.194949	0.141577	0.0900323	0.0547462	0.0255476
6.2	0.197664	0.143331	0.0918526	0.0556318	0.0258777
6.4	0.20016	0.145676	0.0934018	0.0566667	0.0266372
6.6	0.20239	0.148014	0.0947227	0.0575956	0.0272977
6.8	0.20448	0.150191	0.0963266	0.0586626	0.02813
7	0.206487	0.152377	0.0981643	0.0599952	0.0290191
7.2	0.208702	0.154198	0.0996534	0.0614571	0.0295793
7.4	0.21132	0.156967	0.101077	0.062858	0.0306328
7.6	0.213658	0.159627	0.10268	0.0643138	0.0315029
7.8	0.215313	0.162026	0.104035	0.0656113	0.032061
8	0.217322	0.164623	0.105981	0.0673778	0.0331421
8.2	0.219008	0.166279	0.107606	0.0690825	0.0338776
8.4	0.221341	0.168603	0.109985	0.0704334	0.0346798
8.6	0.222946	0.170665	0.111761	0.0719864	0.0355663
8.8	0.224727	0.172591	0.113371	0.0733985	0.0364966
9	0.226287	0.174124	0.114652	0.0738315	0.0371006
9.2	0.228252	0.176241	0.116335	0.0743658	0.0379318
9.4	0.230163	0.177528	0.117436	0.0748664	0.0383186
9.6	0.231899	0.179515	0.118942	0.0755476	0.0388732
9.8	0.233734	0.180854	0.119989	0.0758205	0.0390497
10	0.23588	0.182818	0.121733	0.0768599	0.0397839
10.2	0.237322	0.184254	0.123207	0.0778988	0.0402378
10.4	0.238724	0.185963	0.124406	0.0789419	0.0408159
10.6	0.239556	0.18717	0.125247	0.0800417	0.0414619
10.8	0.241273	0.188638	0.126827	0.0815253	0.0425285
11	0.242601	0.189616	0.128025	0.082708	0.0429385
11.2	0.243897	0.190551	0.128444	0.083492	0.042875
11.4	0.245343	0.192328	0.130037	0.0851016	0.0437929
11.6	0.246729	0.19387	0.131837	0.0866867	0.0445925
11.8	0.247671	0.194843	0.133105	0.0875006	0.0449992
12	0.248909	0.19592	0.134334	0.0890646	0.0459209
12.2	0.249859	0.196763	0.135428	0.0900385	0.0463468
12.4	0.250968	0.198362	0.137047	0.090903	0.0470382
12.6	0.251303	0.19904	0.137927	0.0915823	0.0472345
12.8	0.252387	0.199829	0.138707	0.0917839	0.0477614
13	0.253028	0.200841	0.13925	0.0918721	0.0482148
13.2	0.254268	0.202025	0.140262	0.0922192	0.0485298
13.4	0.255371	0.202588	0.140783	0.0921805	0.0487193
13.6	0.255989	0.204058	0.141904	0.0923333	0.0491574
13.8	0.257001	0.204448	0.142112	0.0922473	0.0491402
14	0.257588	0.20522	0.142683	0.0926052	0.0493081
14.2	0.258369	0.206153	0.143589	0.0932482	0.0492618
14.4	0.259115	0.206916	0.144175	0.0935061	0.0492778
14.6	0.260043	0.207821	0.144863	0.0942398	0.0494478
14.8	0.261044	0.208658	0.14582	0.0951675	0.049948
15	0.261888	0.209207	0.146756	0.0959596	0.0500582
15.2	0.262916	0.210197	0.147446	0.0963789	0.0503301
15.4	0.264178	0.211579	0.148844	0.0974576	0.0513504
15.6	0.265259	0.212524	0.150053	0.0984044	0.0520126
15.8	0.266454	0.21323	0.151043	0.0992042	0.0527271
16	0.267596	0.214344	0.152419	0.10063	0.0537063
16.2	0.268411	0.215282	0.153729	0.101429	0.0543538
16.4	0.269797	0.216923	0.155275	0.10264	0.0554965
16.6	0.270554	0.217621	0.156093	0.103941	0.0561312
16.8	0.271427	0.218631	0.156934	0.104854	0.0569243
17	0.272729	0.219679	0.157985	0.105859	0.0575857
17.2	0.273784	0.220526	0.1588	0.106773	0.0580215
17.4	0.274634	0.221498	0.159626	0.107623	0.0586122
17.6	0.275774	0.22271	0.161001	0.108708	0.0593898
17.8	0.27656	0.223311	0.161639	0.109155	0.0596244
18	0.277049	0.224018	0.162579	0.109649	0.0598293
18.2	0.277831	0.22531	0.163042	0.110553	0.0598289
18.4	0.278137	0.225773	0.163475	0.110971	0.0598569
18.6	0.279215	0.22658	0.164249	0.111907	0.0600985
18.8	0.279296	0.226953	0.164524	0.111972	0.0601244
19	0.279611	0.227929	0.165053	0.112331	0.0603549
19.2	0.280028	0.228642	0.165587	0.11244	0.0606062
19.4	0.280394	0.229194	0.165888	0.113013	0.060746
19.6	0.280728	0.229801	0.166587	0.11352	0.0608435
19.8	0.281442	0.230223	0.167305	0.113841	0.0610115
20	0.281606	0.230415	0.16774	0.113793	0.0606127
20.2	0.281476	0.230664	0.168142	0.113846	0.0602879
20.4	0.282256	0.231955	0.168691	0.114444	0.0605403
20.6	0.282207	0.231933	0.168485	0.114954	0.0603181
20.8	0.282839	0.232999	0.169165	0.115609	0.0608667
21	0.283873	0.233633	0.169968	0.115993	0.0613271
21.2	0.284066	0.2341	0.170464	0.116683	0.0617518
21.4	0.285587	0.235567	0.171878	0.117924	0.0627176
21.6	0.286851	0.236629	0.172666	0.118636	0.0635357
21.8	0.287617	0.237271	0.173523	0.118917	0.0642192
22	0.288718	0.238399	0.174162	0.119637	0.0648359
22.2	0.290065	0.239617	0.174962	0.120483	0.065678
22.4	0.290789	0.239875	0.175549	0.120644	0.065917
22.6	0.291828	0.240971	0.176264	0.121465	0.0667373
22.8	0.292249	0.241802	0.176742	0.121571	0.0672222
23	0.29308	0.242668	0.177166	0.122074	0.0679338
23.2	0.293686	0.243341	0.178626	0.123211	0.0686819
23.4	0.294548	0.244079	0.178919	0.123973	0.0693466
23.6	0.294916	0.244529	0.179727	0.124482	0.069957
23.8	0.295344	0.244707	0.180438	0.125158	0.0701453
24	0.295411	0.244767	0.180857	0.125344	0.0697766
24.2	0.296068	0.2455	0.18186	0.125973	0.0704559
24.4	0.297003	0.246479	0.182412	0.126736	0.0709811
24.6	0.29662	0.246407	0.182606	0.126802	0.0711162
24.8	0.296829	0.247367	0.183455	0.126831	0.071548
25	0.297166	0.247885	0.184087	0.126953	0.0717594
25.2	0.297594	0.248075	0.184331	0.127242	0.0717445
25.4	0.298317	0.249003	0.1848	0.12746	0.0718214
25.6	0.298469	0.249157	0.184886	0.127247	0.0719331
25.8	0.298856	0.249456	0.185682	0.127426	0.0723733
26	0.299621	0.250339	0.186393	0.128146	0.072718
26.2	0.299803	0.250307	0.186533	0.127973	0.0722166
26.4	0.299574	0.250485	0.18662	0.128061	0.0719373
26.6	0.299292	0.250815	0.186536	0.127943	0.0719889
26.8	0.299353	0.250669	0.1868	0.127922	0.0716508
27	0.299474	0.250578	0.187042	0.128294	0.0716693
27.2	0.299911	0.25122	0.188133	0.129275	0.0721371
27.4	0.300552	0.251665	0.18827	0.130104	0.0725984
27.6	0.301113	0.252038	0.189547	0.131132	0.0732204
27.8	0.302119	0.252894	0.190881	0.132623	0.074103
28	0.303185	0.253758	0.191974	0.133766	0.0748812
28.2	0.304324	0.254589	0.192581	0.134568	0.0757577
28.4	0.304355	0.254897	0.192745	0.135402	0.0757085
28.6	0.304334	0.255421	0.193208	0.135808	0.076113
28.8	0.305426	0.256353	0.193733	0.136733	0.076584
29	0.305778	0.256565	0.193724	0.137523	0.0768524
29.2	0.306271	0.256733	0.194231	0.138064	0.0771482
29.4	0.306848	0.257234	0.194563	0.138605	0.0775516
29.6	0.30737	0.257328	0.194719	0.13925	0.0782232
29.8	0.308158	0.258062	0.19531	0.140105	0.0787849
30	0.308402	0.258656	0.195755	0.140291	0.0787249
30.2	0.308161	0.258387	0.195453	0.139969	0.0783194
30.4	0.30816	0.258488	0.195154	0.139616	0.0785891
30.6	0.307925	0.258422	0.195267	0.139127	0.0783638
30.8	0.308344	0.258565	0.195913	0.139173	0.0785961
31	0.309012	0.259161	0.196285	0.139573	0.0789303
31.2	0.309693	0.260439	0.197011	0.140006	0.0795242
31.4	0.310115	0.261122	0.197702	0.140928	0.0801122
31.6	0.311242	0.262143	0.199071	0.141441	0.0808866
31.8	0.312221	0.263424	0.200273	0.142318	0.0815795
32	0.312418	0.264107	0.200709	0.142397	0.081463
32.2	0.312649	0.264487	0.201037	0.142301	0.0814793
32.4	0.312517	0.264919	0.201623	0.142872	0.0815072
32.6	0.312911	0.265885	0.202138	0.142931	0.0818934
32.8	0.313756	0.266749	0.202667	0.143627	0.0822756
33	0.313823	0.266899	0.202825	0.143531	0.0823581
33.2	0.314305	0.267611	0.203671	0.144368	0.082724
33.4	0.315238	0.268221	0.204024	0.145045	0.0832086
33.6	0.315723	0.268751	0.204096	0.145368	0.0836092
33.8	0.316655	0.269575	0.204962	0.146098	0.0842618
34	0.317036	0.269929	0.205484	0.146235	0.0850682
34.2	0.317627	0.269955	0.205633	0.146585	0.0856798
34.4	0.318016	0.270064	0.205888	0.146754	0.0863578
34.6	0.318396	0.270476	0.206873	0.147249	0.0871157
34.8	0.319241	0.271486	0.207475	0.147937	0.0878639
35	0.319704	0.271545	0.207748	0.148255	0.0881217
35.2	0.320041	0.271788	0.208201	0.148527	0.0880766
35.4	0.320617	0.27183	0.208682	0.148785	0.0879916
35.6	0.321292	0.272219	0.209945	0.148983	0.0882757
35.8	0.321851	0.272918	0.211198	0.149615	0.0885242
36	0.321414	0.27282	0.211486	0.149685	0.0882843
36.2	0.322153	0.273532	0.212146	0.149925	0.0884426
36.4	0.322528	0.273502	0.212333	0.150231	0.0880265
36.6	0.322589	0.273863	0.212171	0.149973	0.0875318
36.8	0.32275	0.273885	0.21257	0.150271	0.0873648
37	0.322739	0.273765	0.21266	0.150652	0.087192
37.2	0.322315	0.273881	0.212896	0.151391	0.0870133
37.4	0.322956	0.274242	0.21294	0.151282	0.0871454
37.6	0.323208	0.27452	0.213211	0.151246	0.0874117
37.8	0.323125	0.274758	0.213693	0.151803	0.0878784
38	0.323043	0.275038	0.21366	0.15187	0.088133
38.2	0.322926	0.274998	0.21318	0.152211	0.08809
38.4	0.322293	0.274819	0.212743	0.152396	0.0880414
38.6	0.322374	0.275322	0.213163	0.15289	0.088441
38.8	0.32272	0.27571	0.213508	0.153463	0.0887849
39	0.322908	0.275551	0.213518	0.153585	0.089129
39.2	0.323176	0.276225	0.213626	0.154128	0.0893701
39.4	0.323306	0.276331	0.213617	0.154078	0.0895106
39.6	0.323524	0.277041	0.214228	0.15459	0.0904992
39.8	0.32416	0.277685	0.21453	0.155032	0.0909861
40	0.324331	0.277841	0.214361	0.154901	0.0910709
40.2	0.325801	0.278431	0.215056	0.155158	0.0913407
40.4	0.326339	0.278519	0.215266	0.155355	0.0912343
40.6	0.326436	0.279059	0.215398	0.155465	0.0912592
40.8	0.326964	0.279229	0.215862	0.156155	0.0916889
41	0.327396	0.279517	0.215875	0.156495	0.0918888
41.2	0.328009	0.280389	0.216385	0.156754	0.0924761
41.4	0.328563	0.281248	0.217313	0.157098	0.0933132
41.6	0.328223	0.28149	0.217659	0.157236	0.0933252
41.8	0.327935	0.281471	0.217589	0.157446	0.0931375
42	0.32825	0.282211	0.218426	0.158245	0.0935275
42.2	0.328462	0.282859	0.218988	0.159352	0.0941587
42.4	0.328275	0.283402	0.219676	0.160043	0.0947863
42.6	0.32862	0.284143	0.220375	0.160745	0.0954857
42.8	0.328785	0.284476	0.220968	0.161231	0.095748
43	0.329088	0.285529	0.221489	0.162023	0.096132
43.2	0.32925	0.285678	0.222053	0.162582	0.0964506
43.4	0.329614	0.285276	0.222306	0.162581	0.0965754
43.6	0.330075	0.285681	0.223006	0.162982	0.0975445
43.8	0.330539	0.285662	0.223574	0.163292	0.0979336
44	0.331527	0.285884	0.224035	0.163427	0.0981829
44.2	0.332404	0.285772	0.224176	0.16377	0.0983546
44.4	0.332643	0.285962	0.223949	0.163816	0.0981988
44.6	0.33275	0.285645	0.223344	0.16404	0.0979138
44.8	0.333688	0.285715	0.223256	0.164279	0.0981602
45	0.334045	0.285711	0.223076	0.164084	0.0981868
45.2	0.334838	0.286347	0.223697	0.16477	0.0989472
45.4	0.334772	0.286131	0.223696	0.164879	0.0989784
45.6	0.335053	0.286375	0.223623	0.164744	0.0986413
45.8	0.335656	0.286865	0.224189	0.165451	0.0986277
46	0.335992	0.288093	0.225098	0.166448	0.0990042
46.2	0.336027	0.288307	0.224878	0.166576	0.098932
46.4	0.336307	0.288898	0.225165	0.166853	0.0990313
46.6	0.336384	0.289228	0.225432	0.166878	0.0990834
46.8	0.336655	0.289846	0.226342	0.167479	0.0994738
47	0.336743	0.290516	0.226961	0.168562	0.0998084
47.2	0.337178	0.290415	0.227827	0.16909	0.100352
47.4	0.337071	0.290673	0.227974	0.169041	0.1004
47.6	0.337218	0.291292	0.228785	0.169579	0.101189
47.8	0.337269	0.291497	0.229153	0.169814	0.10179
48	0.337332	0.291386	0.229146	0.169743	0.10182
48.2	0.336844	0.290904	0.228919	0.169325	0.101898
48.4	0.337188	0.291026	0.229182	0.169293	0.101888
48.6	0.337164	0.290644	0.229197	0.16896	0.101969
48.8	0.33764	0.291	0.229761	0.169006	0.102532
49	0.337526	0.290614	0.229746	0.168894	0.102301
49.2	0.337644	0.290379	0.229927	0.169307	0.102613
49.4	0.337674	0.29071	0.230197	0.169158	0.10284
49.6	0.337921	0.291444	0.230954	0.169517	0.102869
49.8	0.337716	0.291895	0.231341	0.170469	0.102927
50	0.337699	0.292071	0.231788	0.17053	0.103386
50.2	0.338155	0.292472	0.232141	0.171027	0.103821
50.4	0.338491	0.292929	0.232284	0.171349	0.103791
50.6	0.338632	0.293629	0.232543	0.171772	0.104485
50.8	0.338814	0.294593	0.233256	0.172558	0.104727
51	0.33915	0.295361	0.233612	0.173403	0.105165
51.2	0.339673	0.29615	0.234162	0.173878	0.105475
51.4	0.340152	0.296806	0.23436	0.174207	0.105566
51.6	0.341055	0.29742	0.234816	0.174824	0.106057
51.8	0.341643	0.297936	0.235018	0.174754	0.106288
52	0.341246	0.297838	0.23469	0.174009	0.105734
52.2	0.342305	0.297951	0.234806	0.173488	0.105987
52.4	0.342896	0.298345	0.235359	0.173834	0.106224
52.6	0.342844	0.298091	0.235505	0.173672	0.10644
52.8	0.34327	0.298469	0.235965	0.174252	0.106778
53	0.343546	0.298151	0.235957	0.174249	0.106676
53.2	0.343568	0.298348	0.236318	0.174368	0.107044
53.4	0.343973	0.298643	0.23683	0.174491	0.107595
53.6	0.343989	0.298161	0.236729	0.17479	0.107442
53.8	0.343864	0.297862	0.236585	0.175303	0.107576
54	0.343988	0.297722	0.236726	0.175025	0.107334
54.2	0.344402	0.298271	0.236747	0.175907	0.107303
54.4	0.344744	0.298494	0.236498	0.176429	0.107021
54.6	0.34526	0.299267	0.236857	0.177031	0.107469
54.8	0.34551	0.299492	0.237129	0.177433	0.107419
55	0.346007	0.299859	0.237238	0.177734	0.107691
55.2	0.346059	0.299845	0.23719	0.177761	0.107396
55.4	0.346494	0.299852	0.236822	0.177797	0.107186
55.6	0.346684	0.300199	0.236593	0.177889	0.107275
55.8	0.34705	0.300992	0.23713	0.17804	0.107842
56	0.34702	0.300735	0.237076	0.177676	0.108185
56.2	0.347621	0.301119	0.23774	0.177836	0.108682
56.4	0.347338	0.301231	0.238226	0.178497	0.109008
56.6	0.347841	0.301437	0.238428	0.178875	0.109714
56.8	0.347522	0.30196	0.238864	0.178908	0.110161
57	0.347555	0.301912	0.239148	0.17882	0.11041
57.2	0.347059	0.302038	0.239267	0.178493	0.11052
57.4	0.34685	0.30197	0.239671	0.178991	0.111304
57.6	0.3467	0.302149	0.239816	0.178985	0.11153
57.8	0.347175	0.302817	0.240344	0.179328	0.112193
58	0.346828	0.303107	0.240966	0.179464	0.112211
58.2	0.347372	0.303775	0.241302	0.180164	0.112725
58.4	0.347401	0.303945	0.241353	0.180433	0.112747
58.6	0.347799	0.304476	0.241731	0.180635	0.113088
58.8	0.348215	0.304695	0.242474	0.181188	0.113597
59	0.348301	0.304838	0.242801	0.181413	0.113675
59.2	0.348547	0.304916	0.242346	0.181546	0.113706
59.4	0.348674	0.304866	0.242168	0.18207	0.11364
59.6	0.349397	0.305289	0.242792	0.182433	0.113986
59.8	0.350119	0.306075	0.243393	0.182891	0.114097
60	0.350388	0.306146	0.243321	0.182842	0.113873
60.2	0.350712	0.30659	0.243689	0.183361	0.113934
60.4	0.351551	0.306883	0.243999	0.184183	0.114185
60.6	0.351889	0.307429	0.24425	0.184184	0.114207
60.8	0.351472	0.3075	0.244571	0.18427	0.114022
61	0.351404	0.307124	0.244403	0.184188	0.11384
61.2	0.351411	0.307439	0.244728	0.184532	0.11398
61.4	0.351873	0.308007	0.245615	0.185122	0.114697
61.6	0.351857	0.308254	0.245415	0.184594	0.114718
61.8	0.352288	0.308995	0.245731	0.184926	0.115212
62	0.35174	0.308845	0.2458	0.184864	0.115236
62.2	0.352081	0.30907	0.24559	0.184919	0.115381
62.4	0.352235	0.309113	0.245824	0.185154	0.116033
62.6	0.352492	0.309231	0.246058	0.185216	0.116234
62.8	0.352431	0.309102	0.246748	0.185554	0.116488
63	0.352677	0.309475	0.24707	0.185626	0.116693
63.2	0.352529	0.309518	0.247071	0.185443	0.116619
63.4	0.352959	0.309993	0.24788	0.186082	0.116778
63.6	0.353385	0.310646	0.248353	0.186377	0.116775
63.8	0.353708	0.311061	0.248747	0.186841	0.116969
64	0.354026	0.311527	0.249321	0.187104	0.11757
64.2	0.35443	0.311294	0.249543	0.187465	0.117392
64.4	0.354728	0.311491	0.250038	0.187764	0.116995
64.6	0.35499	0.311634	0.250332	0.187715	0.11661
64.8	0.355108	0.311554	0.250567	0.18831	0.116884
65	0.355391	0.311331	0.25055	0.188212	0.116757
65.2	0.355914	0.31146	0.250776	0.188332	0.11684
65.4	0.355917	0.311643	0.250748	0.188191	0.116732
65.6	0.355568	0.311646	0.250417	0.187945	0.116796
65.8	0.356028	0.311992	0.250489	0.18821	0.117269
66	0.355558	0.311572	0.250355	0.188249	0.117624
66.2	0.355497	0.311235	0.249981	0.188227	0.117809
66.4	0.355327	0.311354	0.250098	0.18848	0.118326
66.6	0.355084	0.311326	0.250222	0.188744	0.118419
66.8	0.354898	0.311549	0.250553	0.189208	0.11897
67	0.354851	0.311789	0.250479	0.189372	0.118846
67.2	0.354923	0.311564	0.250663	0.189784	0.118849
67.4	0.355526	0.312179	0.250973	0.190547	0.119313
67.6	0.355474	0.312366	0.251373	0.190575	0.119476
67.8	0.356169	0.313034	0.252414	0.19115	0.120671
68	0.356839	0.313793	0.252884	0.191435	0.121228
68.2	0.357355	0.313971	0.253108	0.191774	0.121003
68.4	0.358019	0.314762	0.253641	0.192231	0.120944
68.6	0.358368	0.31545	0.253758	0.192186	0.121251
68.8	0.358674	0.315865	0.253909	0.19231	0.121426
69	0.359268	0.315758	0.254016	0.191757	0.121148
69.2	0.359836	0.316165	0.254452	0.191731	0.121314
69.4	0.359588	0.316723	0.254864	0.191396	0.121475
69.6	0.360056	0.316781	0.255062	0.191578	0.121957
69.8	0.360237	0.31701	0.255176	0.191816	0.122289
70	0.359979	0.316874	0.255458	0.192151	0.122573
70.2	0.360124	0.31672	0.255284	0.192451	0.122408
70.4	0.360181	0.3172	0.255383	0.192949	0.12258
70.6	0.359862	0.316821	0.255193	0.193071	0.122607
70.8	0.359636	0.316976	0.254978	0.192929	0.122393
71	0.360292	0.316862	0.255318	0.193451	0.12246
71.2	0.360705	0.316889	0.255732	0.193843	0.122851
71.4	0.360798	0.317527	0.256081	0.194326	0.123384
71.6	0.361175	0.317821	0.256562	0.194405	0.124119
71.8	0.361583	0.318368	0.256766	0.195367	0.124827
72	0.362516	0.318611	0.256682	0.195811	0.125132
72.2	0.362483	0.318817	0.256766	0.195857	0.124882
72.4	0.362456	0.318717	0.256776	0.195756	0.12451
72.6	0.362452	0.318853	0.256836	0.195581	0.124651
72.8	0.362992	0.319046	0.257287	0.195412	0.12479
73	0.363	0.318693	0.257076	0.195145	0.124716
73.2	0.363132	0.31876	0.257155	0.194965	0.124999
73.4	0.362811	0.318591	0.25685	0.194464	0.124729
73.6	0.363001	0.318369	0.256471	0.194469	0.124241
73.8	0.36288	0.318897	0.257176	0.194937	0.124369
74	0.362753	0.319033	0.257377	0.19495	0.123924
74.2	0.36316	0.319386	0.257662	0.195441	0.124073
74.4	0.36332	0.319878	0.25799	0.195723	0.124191
74.6	0.363099	0.319739	0.257963	0.195694	0.124146
74.8	0.363522	0.320424	0.258413	0.196013	0.124445
75	0.363742	0.320413	0.258584	0.196734	0.125161
75.2	0.363055	0.320837	0.258497	0.196698	0.125061
75.4	0.363208	0.321338	0.259079	0.197329	0.125897
75.6	0.363488	0.321674	0.259457	0.19769	0.12629
75.8	0.363973	0.322145	0.259833	0.198621	0.126692
76	0.364677	0.322611	0.260855	0.19964	0.127792
76.2	0.364611	0.322435	0.261204	0.199529	0.127772
76.4	0.364662	0.322063	0.261231	0.199828	0.128001
76.6	0.364609	0.322518	0.261324	0.200149	0.128446
76.8	0.364821	0.322673	0.261506	0.200409	0.128688
77	0.364629	0.322258	0.261164	0.200276	0.12857
77.2	0.364871	0.321691	0.260971	0.199846	0.128318
77.4	0.364989	0.321617	0.26107	0.199895	0.128066
77.6	0.365492	0.322116	0.26136	0.200073	0.128128
77.8	0.366204	0.322438	0.262213	0.200675	0.128549
78	0.366393	0.322138	0.262017	0.200276	0.12834
78.2	0.366593	0.321753	0.261731	0.200315	0.128735
78.4	0.36724	0.321747	0.261798	0.200228	0.128836
78.6	0.367432	0.321769	0.261727	0.200015	0.128809
78.8	0.36745	0.321858	0.261839	0.199856	0.128938
79	0.367546	0.32198	0.261788	0.199799	0.129276
79.2	0.367333	0.322128	0.261758	0.199357	0.129047
79.4	0.367831	0.322381	0.261818	0.199393	0.129584
79.6	0.368134	0.322599	0.261855	0.199433	0.129748
79.8	0.368823	0.323252	0.262494	0.200176	0.130544
80	0.368894	0.323538	0.263025	0.200433	0.130782
80.2	0.369232	0.323845	0.262775	0.200391	0.130425
80.4	0.369004	0.324306	0.262663	0.200725	0.130417
80.6	0.368827	0.324498	0.262601	0.200738	0.13023
80.8	0.368923	0.324694	0.262651	0.200987	0.129662
81	0.368497	0.324771	0.26259	0.201121	0.129478
81.2	0.36854	0.32456	0.262454	0.201411	0.129315
81.4	0.368476	0.324881	0.262712	0.201729	0.129409
81.6	0.368883	0.325466	0.263211	0.202246	0.129832
81.8	0.368561	0.324966	0.263081	0.202255	0.129828
82	0.368935	0.325379	0.263614	0.202949	0.130236
82.2	0.368955	0.325228	0.263525	0.203079	0.130636
82.4	0.369509	0.325534	0.264585	0.203381	0.130948
82.6	0.369249	0.325634	0.264631	0.203762	0.131054
82.8	0.368942	0.325623	0.264709	0.203875	0.131283
83	0.369269	0.32577	0.264817	0.2041	0.131541
83.2	0.369126	0.325408	0.264427	0.203758	0.131478
83.4	0.369571	0.325371	0.264622	0.203874	0.13173
83.6	0.369851	0.325255	0.265206	0.204266	0.132039
83.8	0.370551	0.326102	0.266174	0.204797	0.132653
84	0.370128	0.326016	0.266306	0.204393	0.132316
84.2	0.370337	0.326117	0.266294	0.204461	0.132364
84.4	0.370049	0.326185	0.266466	0.204119	0.132549
84.6	0.369617	0.32568	0.266302	0.203975	0.132027
84.8	0.369866	0.326303	0.266817	0.204447	0.132015
85	0.369867	0.326394	0.266795	0.204647	0.132262
85.2	0.370262	0.326458	0.26678	0.204328	0.132533
85.4	0.370109	0.326639	0.266981	0.204369	0.132565
85.6	0.370628	0.327309	0.267658	0.205155	0.133237
85.8	0.370742	0.327843	0.267995	0.205311	0.133446
86	0.371133	0.328369	0.268588	0.205659	0.13362
86.2	0.371261	0.328331	0.268691	0.205651	0.133642
86.4	0.371041	0.328747	0.269173	0.20594	0.133769
86.6	0.371195	0.328738	0.268812	0.20644	0.133826
86.8	0.371068	0.329316	0.269037	0.206777	0.133945
87	0.371412	0.329349	0.268873	0.207015	0.134354
87.2	0.371591	0.329594	0.268829	0.207737	0.134556
87.4	0.372003	0.330128	0.269449	0.208944	0.135308
87.6	0.371933	0.330736	0.269398	0.209339	0.135844
87.8	0.371937	0.331349	0.26939	0.209456	0.135938
88	0.371633	0.331019	0.269247	0.209491	0.135837
88.2	0.371952	0.331257	0.269129	0.209773	0.13625
88.4	0.37215	0.331391	0.26903	0.21018	0.136627
88.6	0.372289	0.331291	0.26884	0.210361	0.136506
88.8	0.37313	0.331664	0.269017	0.210463	0.137096
89	0.373013	0.331214	0.268298	0.210141	0.137108
89.2	0.373417	0.331269	0.268229	0.210059	0.137158
89.4	0.373623	0.331751	0.268601	0.20996	0.137423
89.6	0.374109	0.331748	0.269042	0.210087	0.13761
89.8	0.374477	0.33193	0.269636	0.209894	0.13764
90	0.374977	0.331448	0.270073	0.20983	0.137452
90.2	0.375545	0.33149	0.27071	0.209868	0.137223
90.4	0.375314	0.331365	0.270715	0.209727	0.137247
90.6	0.375418	0.331102	0.271104	0.209968	0.137672
90.8	0.375585	0.331875	0.271531	0.210457	0.138071
91	0.375726	0.331559	0.271548	0.210648	0.137946
91.2	0.375524	0.33192	0.271763	0.211022	0.137744
91.4	0.375591	0.332071	0.271937	0.211202	0.137893
91.6	0.375345	0.332258	0.271674	0.210726	0.137419
91.8	0.375437	0.332487	0.272092	0.210982	0.137165
92	0.375204	0.332339	0.272234	0.211524	0.13733
92.2	0.37517	0.332904	0.272435	0.212099	0.137483
92.4	0.375428	0.333027	0.27268	0.212708	0.137961
92.6	0.375249	0.333174	0.273031	0.212836	0.137931
92.8	0.375796	0.333317	0.273229	0.213237	0.138164
93	0.375615	0.333233	0.272898	0.213354	0.138238
93.2	0.376304	0.333874	0.273446	0.213824	0.138827
93.4	0.376742	0.334498	0.273943	0.213949	0.139444
93.6	0.376836	0.334041	0.274474	0.214211	0.139277
93.8	0.377386	0.334643	0.275088	0.214585	0.139901
94	0.377467	0.334664	0.27542	0.214654	0.140208
94.2	0.377753	0.334792	0.275664	0.214676	0.140725
94.4	0.378213	0.334976	0.276038	0.215004	0.141564
94.6	0.377952	0.335116	0.276547	0.214743	0.141961
94.8	0.378055	0.335388	0.276353	0.214673	0.141982
95	0.377765	0.335227	0.276189	0.21467	0.142119
95.2	0.377498	0.335227	0.275766	0.214216	0.14206
95.4	0.377506	0.334837	0.275514	0.214049	0.141886
95.6	0.377532	0.334838	0.275195	0.213913	0.141545
95.8	0.377357	0.334812	0.275175	0.214434	0.141987
96	0.377283	0.334645	0.274841	0.214761	0.14172
96.2	0.378113	0.335297	0.275024	0.215665	0.141848
96.4	0.378491	0.335281	0.274813	0.215763	0.141858
96.6	0.378612	0.335681	0.27444	0.215979	0.141277
96.8	0.379047	0.335806	0.274242	0.216177	0.141313
97	0.379095	0.33585	0.274132	0.216274	0.141047
97.2	0.379385	0.336016	0.274346	0.216697	0.141054
97.4	0.379433	0.336381	0.274452	0.216758	0.141111
97.6	0.379452	0.336568	0.274881	0.216737	0.141065
97.8	0.379894	0.337501	0.275383	0.217188	0.141822
98	0.380246	0.337655	0.276146	0.217414	0.142213
98.2	0.380756	0.338005	0.276922	0.21756	0.142742
98.4	0.381022	0.338578	0.277567	0.217924	0.14317
98.6	0.380267	0.338718	0.277511	0.217476	0.143092
98.8	0.380605	0.339153	0.277955	0.218262	0.143824
99	0.380365	0.339139	0.277901	0.218308	0.143746
99.2	0.379895	0.338753	0.277365	0.217665	0.142972
99.4	0.379851	0.338707	0.277499	0.217765	0.143114
99.6	0.379609	0.33847	0.277492	0.217825	0.143435
99.8	0.379416	0.338501	0.277803	0.217922	0.143957
100	0.379624	0.338827	0.278059	0.218547	0.14414
100.2	0.380101	0.339171	0.27849	0.218833	0.144584
100.4	0.380059	0.338889	0.277919	0.218226	0.14434
100.6	0.380134	0.339159	0.278095	0.218382	0.144528
100.8	0.380689	0.339228	0.278419	0.218361	0.144879
101	0.38111	0.339309	0.278644	0.218472	0.144741
101.2	0.381152	0.339466	0.278852	0.218657	0.1449
101.4	0.381595	0.339898	0.279345	0.21871	0.145523
101.6	0.381863	0.340142	0.279482	0.218439	0.14529
101.8	0.382427	0.340094	0.279972	0.218636	0.145687
102	0.382775	0.339737	0.280145	0.218733	0.145728
102.2	0.383219	0.340078	0.280202	0.218771	0.145737
102.4	0.383627	0.340477	0.280357	0.219113	0.145878
102.6	0.383816	0.341057	0.280612	0.219274	0.145838
102.8	0.384262	0.341254	0.280893	0.219425	0.145755
103	0.384338	0.341486	0.280811	0.219146	0.145408
103.2	0.384599	0.341737	0.280774	0.219103	0.145133
103.4	0.385087	0.342119	0.281262	0.219471	0.145681
103.6	0.384285	0.341443	0.281187	0.219245	0.145826
103.8	0.3842	0.341558	0.281775	0.219453	0.146111
104	0.384064	0.34191	0.282016	0.220204	0.146791
104.2	0.384224	0.341661	0.282467	0.219961	0.147088
104.4	0.384222	0.341586	0.282128	0.220076	0.147351
104.6	0.384027	0.341794	0.282545	0.220432	0.147504
104.8	0.383985	0.341811	0.282587	0.220843	0.147619
105	0.383811	0.341549	0.282782	0.22132	0.147412
105.2	0.383414	0.341518	0.283017	0.221756	0.147322
105.4	0.383171	0.341459	0.282731	0.221801	0.147682
105.6	0.382898	0.341204	0.282435	0.221893	0.147548
105.8	0.383259	0.340622	0.282356	0.222175	0.148001
106	0.383672	0.340635	0.282306	0.222424	0.148126
106.2	0.383724	0.340567	0.282044	0.222435	0.147798
106.4	0.384384	0.341263	0.282403	0.222734	0.148096
106.6	0.384857	0.342409	0.282955	0.222744	0.148472
106.8	0.385046	0.342368	0.282646	0.22247	0.14805
107	0.385746	0.342768	0.283023	0.222488	0.148098
107.2	0.386272	0.34295	0.282952	0.222461	0.148083
107.4	0.386454	0.343125	0.283324	0.222478	0.14863
107.6	0.386066	0.342936	0.283546	0.22235	0.148545
107.8	0.386429	0.34288	0.283992	0.222303	0.148594
108	0.386081	0.34285	0.283649	0.22219	0.148643
108.2	0.38563	0.34225	0.283493	0.221569	0.148295
108.4	0.385217	0.342445	0.283268	0.221798	0.148078
108.6	0.384355	0.342521	0.283304	0.221942	0.14754
108.8	0.384004	0.342479	0.283192	0.222235	0.147523
109	0.383834	0.342442	0.283072	0.222363	0.147042
109.2	0.383701	0.342784	0.283155	0.222866	0.147457
109.4	0.383636	0.342848	0.282808	0.223232	0.147993
109.6	0.383423	0.343196	0.282794	0.223479	0.1482
109.8	0.383894	0.343492	0.282955	0.223726	0.148609
110	0.384133	0.344213	0.283663	0.22423	0.149084
110.2	0.384115	0.344667	0.28382	0.224465	0.149106
110.4	0.384751	0.345858	0.284524	0.224714	0.15018
110.6	0.385394	0.346467	0.285273	0.225184	0.150796
110.8	0.385828	0.346597	0.285324	0.225294	0.150926
111	0.386474	0.346929	0.285746	0.225316	0.151639
111.2	0.386914	0.346965	0.285872	0.225556	0.152183
111.4	0.38712	0.347024	0.286258	0.225575	0.152363
111.6	0.38709	0.347165	0.286207	0.225504	0.151894
111.8	0.386875	0.345751	0.285836	0.224848	0.151766
112	0.386395	0.345659	0.285614	0.224707	0.151607
112.2	0.38632	0.345487	0.285731	0.224543	0.151465
112.4	0.386506	0.345843	0.286354	0.22496	0.15193
112.6	0.386064	0.345283	0.286346	0.224693	0.151356
112.8	0.385944	0.344624	0.286173	0.224431	0.150925
113	0.385996	0.344483	0.286128	0.224938	0.150689
113.2	0.386248	0.344822	0.286427	0.225496	0.151205
113.4	0.386113	0.34492	0.286442	0.226061	0.151164
113.6	0.385679	0.34562	0.286742	0.226312	0.151301
113.8	0.386381	0.346055	0.287353	0.226776	0.151722
114	0.386141	0.346096	0.287557	0.226885	0.151685
114.2	0.386224	0.34616	0.287581	0.226945	0.151653
114.4	0.386541	0.346387	0.287829	0.227127	0.152061
114.6	0.38709	0.346502	0.288159	0.227916	0.152299
114.8	0.387247	0.34735	0.288447	0.228132	0.152793
115	0.387099	0.347065	0.288192	0.228119	0.152797
115.2	0.386952	0.347167	0.288191	0.228035	0.15277
115.4	0.387393	0.348045	0.28868	0.228282	0.153266
115.6	0.387346	0.348696	0.288744	0.228318	0.153615
115.8	0.387885	0.348437	0.288944	0.228486	0.154246
116	0.388149	0.349384	0.289249	0.228815	0.154336
116.2	0.388621	0.349347	0.289333	0.228549	0.154295
116.4	0.388885	0.349202	0.289281	0.228216	0.154211
116.6	0.388724	0.348511	0.288926	0.227597	0.15333
116.8	0.389388	0.348821	0.289246	0.22771	0.153813
117	0.38979	0.349634	0.289862	0.228246	0.154438
117.2	0.390012	0.349774	0.289794	0.227953	0.154574
117.4	0.389909	0.350078	0.289891	0.22829	0.154863
117.6	0.389798	0.350134	0.289702	0.228036	0.15491
117.8	0.389702	0.349593	0.2894	0.22766	0.154905
118	0.389389	0.349484	0.289056	0.227425	0.154824
118.2	0.389456	0.34933	0.28899	0.22777	0.154808
118.4	0.389189	0.349086	0.288831	0.22802	0.154512
118.6	0.389204	0.34919	0.288877	0.228299	0.154931
118.8	0.389114	0.349462	0.289153	0.228534	0.155029
119	0.388886	0.349025	0.289046	0.228471	0.154554
119.2	0.389136	0.349784	0.289344	0.228675	0.154792
119.4	0.389334	0.350305	0.289971	0.229304	0.155443
119.6	0.389053	0.350218	0.289588	0.229388	0.154856
119.8	0.389212	0.350229	0.290077	0.229536	0.154893
120	0.389075	0.35024	0.290636	0.229654	0.154601
120.2	0.38926	0.35009	0.290729	0.22951	0.154353
120.4	0.389807	0.350484	0.291539	0.229672	0.155068
120.6	0.390119	0.350667	0.292412	0.229728	0.155684
120.8	0.390297	0.351175	0.293113	0.230363	0.156474
121	0.390454	0.35156	0.293758	0.230902	0.156796
121.2	0.390475	0.351443	0.293718	0.231022	0.156743
121.4	0.390301	0.351465	0.293814	0.231179	0.156887
121.6	0.390414	0.351038	0.293664	0.231182	0.156743
121.8	0.390149	0.351054	0.293349	0.230732	0.156608
122	0.390372	0.351427	0.293173	0.230461	0.156598
122.2	0.390341	0.351213	0.292876	0.230611	0.156337
122.4	0.390507	0.350953	0.292638	0.230385	0.156173
122.6	0.390938	0.350976	0.29255	0.230311	0.156085
122.8	0.391348	0.350968	0.292679	0.230971	0.155937
123	0.391984	0.351266	0.292819	0.230962	0.155897
123.2	0.392279	0.351634	0.29264	0.230906	0.1558
123.4	0.391936	0.351689	0.292412	0.230731	0.155542
123.6	0.392082	0.351266	0.292272	0.230869	0.155136
123.8	0.392516	0.351548	0.292878	0.230962	0.15592
124	0.39312	0.351797	0.293251	0.231299	0.156528
124.2	0.393382	0.352062	0.293449	0.231294	0.157148
124.4	0.393771	0.352412	0.294309	0.231911	0.158117
124.6	0.394144	0.352334	0.294411	0.232152	0.158479
124.8	0.394323	0.352614	0.294698	0.232685	0.159359
125	0.394885	0.352984	0.295407	0.233494	0.160304
125.2	0.394083	0.352849	0.295434	0.233278	0.160277
125.4	0.393898	0.352576	0.295446	0.233221	0.160223
125.6	0.393448	0.352566	0.295815	0.233666	0.160441
125.8	0.393425	0.353213	0.29623	0.233848	0.160842
126	0.39309	0.352763	0.296159	0.233739	0.160569
126.2	0.393576	0.352587	0.296418	0.234517	0.160782
126.4	0.393541	0.352378	0.296301	0.234564	0.160571
126.6	0.393417	0.352486	0.296416	0.2349	0.160405
126.8	0.39347	0.352656	0.296607	0.235252	0.160585
127	0.393858	0.353391	0.296681	0.234936	0.160242
127.2	0.393952	0.353388	0.296714	0.235156	0.160012
127.4	0.394027	0.353805	0.296416	0.235369	0.159768
127.6	0.394501	0.353876	0.29642	0.235375	0.159743
127.8	0.394793	0.354388	0.296146	0.235376	0.159607
128	0.394819	0.354784	0.296463	0.235662	0.159445
128.2	0.39524	0.355305	0.296575	0.235704	0.159441
128.4	0.395724	0.355316	0.296289	0.235739	0.159277
128.6	0.3963	0.355369	0.296164	0.2356	0.159147
128.8	0.395942	0.355242	0.295902	0.235304	0.159408
129	0.396025	0.354647	0.295794	0.235254	0.159252
129.2	0.395059	0.354121	0.295367	0.234565	0.158806
129.4	0.395412	0.354123	0.295346	0.234835	0.159326
129.6	0.395402	0.354554	0.29555	0.235219	0.1602
129.8	0.395899	0.354798	0.295858	0.235313	0.160454
130	0.395628	0.354317	0.295345	0.235042	0.160159
130.2	0.395522	0.353964	0.295247	0.235021	0.160515
130.4	0.394822	0.354177	0.29523	0.234812	0.16068
130.6	0.395325	0.354705	0.296227	0.235194	0.161507
130.8	0.395373	0.355108	0.296707	0.235364	0.162001
131	0.395694	0.355638	0.297058	0.235743	0.162125
131.2	0.39619	0.356252	0.297656	0.236681	0.16287
131.4	0.395686	0.357054	0.297786	0.237011	0.162714
131.6	0.395477	0.357366	0.29812	0.23684	0.16253
131.8	0.39546	0.35799	0.298769	0.237782	0.162773
132	0.396071	0.35861	0.299287	0.238372	0.162952
132.2	0.396569	0.358831	0.299388	0.238518	0.163089
132.4	0.396595	0.358614	0.299214	0.238487	0.162824
132.6	0.396218	0.358395	0.299202	0.238291	0.162424
132.8	0.396211	0.358136	0.298811	0.237899	0.162711
133	0.396358	0.357705	0.298772	0.237947	0.162845
133.2	0.396831	0.357813	0.298947	0.23809	0.163655
133.4	0.397329	0.357823	0.298937	0.23824	0.164002
133.6	0.397734	0.358223	0.299162	0.238357	0.164512
133.8	0.397802	0.357765	0.299425	0.238183	0.164267
134	0.397258	0.357433	0.299068	0.237855	0.164291
134.2	0.397015	0.357192	0.299157	0.237687	0.164137
134.4	0.397054	0.357293	0.299368	0.237953	0.164304
134.6	0.396986	0.357225	0.299239	0.237667	0.164005
134.8	0.396706	0.356822	0.298927	0.237553	0.16375
135	0.396716	0.35675	0.29902	0.237429	0.163419
135.2	0.397103	0.357553	0.299435	0.237609	0.163755
135.4	0.396873	0.357453	0.299616	0.237446	0.16344
135.6	0.397353	0.357776	0.300197	0.237392	0.163775
135.8	0.397986	0.358516	0.300745	0.238143	0.16457
136	0.398151	0.358316	0.300513	0.238275	0.16429
136.2	0.398308	0.358307	0.300312	0.238336	0.164466
136.4	0.399	0.358503	0.300603	0.238443	0.164597
136.6	0.399129	0.359062	0.300678	0.238639	0.164597
136.8	0.399368	0.359046	0.300583	0.239191	0.164845
137	0.399809	0.359428	0.300824	0.239894	0.165023
137.2	0.400796	0.360119	0.3012	0.240539	0.165861
137.4	0.400138	0.359662	0.300477	0.240289	0.165502
137.6	0.399954	0.360232	0.300257	0.24047	0.165869
137.8	0.399837	0.360314	0.300682	0.240906	0.165809
138	0.399289	0.360517	0.300664	0.241228	0.165694
138.2	0.399398	0.360682	0.300924	0.24191	0.165796
138.4	0.399253	0.360526	0.300746	0.242092	0.165594
138.6	0.398933	0.360538	0.300702	0.241924	0.165718
138.8	0.399415	0.360528	0.301259	0.24207	0.166116
139	0.398984	0.360574	0.301631	0.241688	0.165863
139.2	0.399113	0.360724	0.301695	0.241638	0.166041
139.4	0.398994	0.360509	0.301896	0.241697	0.166019
139.6	0.399199	0.360633	0.302705	0.241992	0.166501
139.8	0.399074	0.360303	0.302387	0.242153	0.166387
140	0.398999	0.359585	0.301966	0.241881	0.165769
140.2	0.399249	0.359541	0.301898	0.241912	0.165716
140.4	0.399245	0.359088	0.302117	0.2416	0.165312
140.6	0.398608	0.359094	0.301571	0.241756	0.164838
140.8	0.399019	0.358794	0.30185	0.241513	0.164688
141	0.399147	0.359237	0.301866	0.241217	0.164813
141.2	0.399282	0.359147	0.301641	0.240647	0.164982
141.4	0.399019	0.359198	0.301776	0.240177	0.164983
141.6	0.39929	0.359772	0.302118	0.240405	0.165304
141.8	0.399691	0.360153	0.302988	0.241081	0.165723
142	0.399496	0.360182	0.303224	0.241174	0.1665
142.2	0.400485	0.360914	0.303814	0.241915	0.167602
142.4	0.400564	0.36133	0.303939	0.242148	0.168265
142.6	0.400549	0.361547	0.304018	0.242125	0.169093
142.8	0.400874	0.361913	0.304085	0.24231	0.169331
143	0.400736	0.362224	0.304235	0.242358	0.16929
143.2	0.400928	0.362641	0.30397	0.242336	0.169837
143.4	0.400925	0.362993	0.304073	0.242692	0.170201
143.6	0.401202	0.363098	0.304276	0.242878	0.170375
143.8	0.400803	0.362477	0.303504	0.242763	0.169649
144	0.401069	0.362433	0.303307	0.243135	0.16962
144.2	0.401	0.362595	0.303289	0.243362	0.169501
144.4	0.401038	0.362253	0.30308	0.243425	0.169529
144.6	0.40136	0.362491	0.30332	0.24377	0.169414
144.8	0.402054	0.362731	0.303664	0.243312	0.169161
145	0.401703	0.362791	0.303248	0.242936	0.168762
145.2	0.402071	0.36288	0.303646	0.242933	0.168644
145.4	0.402025	0.362905	0.30411	0.242863	0.168373
145.6	0.401569	0.36256	0.303882	0.242776	0.168055
145.8	0.401553	0.362664	0.304184	0.242849	0.168273
146	0.401612	0.362589	0.304922	0.243044	0.168636
146.2	0.401949	0.362829	0.305426	0.243584	0.168574
146.4	0.401597	0.362828	0.305278	0.24324	0.168389
146.6	0.401547	0.362525	0.305219	0.243354	0.168424
146.8	0.401746	0.362671	0.305151	0.243957	0.168262
147	0.401668	0.362729	0.305189	0.24394	0.168247
147.2	0.402016	0.362864	0.304913	0.243853	0.168601
147.4	0.402019	0.362768	0.30496	0.244211	0.168553
147.6	0.402097	0.362695	0.304719	0.244448	0.168472
147.8	0.402517	0.363026	0.30495	0.245633	0.168884
148	0.402707	0.363578	0.304706	0.246182	0.169358
148.2	0.403136	0.363917	0.304848	0.246534	0.169887
148.4	0.403568	0.363859	0.305129	0.2472	0.17058
148.6	0.403889	0.364211	0.30548	0.247291	0.170613
148.8	0.404422	0.364361	0.305629	0.247278	0.170616
149	0.404806	0.364627	0.30611	0.247196	0.171031
149.2	0.405196	0.36486	0.306516	0.247531	0.171396
149.4	0.404841	0.365084	0.30659	0.247394	0.171469
149.6	0.404768	0.365985	0.307288	0.247698	0.172093
149.8	0.404878	0.366062	0.307927	0.248104	0.172233
150	0.404687	0.365785	0.308396	0.247896	0.172277
150.2	0.404651	0.365729	0.308719	0.247926	0.172272
150.4	0.404312	0.365224	0.308338	0.247537	0.172318
150.6	0.403836	0.364488	0.30802	0.247989	0.172465
150.8	0.403804	0.364048	0.307616	0.24776	0.172082
151	0.403916	0.363885	0.307574	0.247547	0.1722
151.2	0.403627	0.363673	0.307249	0.247438	0.17228
151.4	0.402781	0.363469	0.306773	0.246861	0.171956
151.6	0.402834	0.363808	0.306301	0.246861	0.172144
151.8	0.403044	0.364328	0.306499	0.247318	0.172199
152	0.402608	0.363815	0.306032	0.246771	0.171745
152.2	0.402712	0.363847	0.306333	0.247043	0.171593
152.4	0.402902	0.363705	0.30663	0.247221	0.171482
152.6	0.403165	0.364068	0.30664	0.24716	0.171202
152.8	0.40382	0.364417	0.306967	0.247446	0.171365
153	0.404238	0.364714	0.307001	0.247459	0.1715
153.2	0.404444	0.365554	0.306609	0.247884	0.171331
153.4	0.4044	0.366176	0.307263	0.24802	0.171322
153.6	0.404776	0.367005	0.307897	0.248381	0.171579
153.8	0.405273	0.36692	0.308127	0.248946	0.171648
154	0.405507	0.366274	0.308093	0.248255	0.171726
154.2	0.405506	0.366531	0.308909	0.248812	0.171798
154.4	0.405365	0.365882	0.30854	0.248773	0.171699
154.6	0.40459	0.365801	0.308269	0.248582	0.17142
154.8	0.40481	0.365736	0.30853	0.248455	0.171721
155	0.404863	0.366237	0.308791	0.248786	0.172196
155.2	0.404564	0.366101	0.308302	0.248441	0.172367
155.4	0.404309	0.36639	0.307967	0.248264	0.172124
155.6	0.404562	0.366247	0.307629	0.248488	0.172064
155.8	0.404468	0.366093	0.307719	0.248769	0.172032
156	0.404252	0.36557	0.307964	0.248934	0.172022
156.2	0.40486	0.365755	0.307937	0.249267	0.1722
156.4	0.405752	0.365956	0.308149	0.249544	0.172991
156.6	0.406559	0.366648	0.308598	0.249785	0.173706
156.8	0.406555	0.366638	0.308467	0.249389	0.174079
157	0.406899	0.36665	0.308548	0.248889	0.174248
157.2	0.407211	0.367294	0.308726	0.248624	0.174493
157.4	0.407021	0.367413	0.309153	0.248367	0.1748
157.6	0.406938	0.367668	0.30904	0.248469	0.175032
157.8	0.407068	0.367799	0.309452	0.248683	0.175349
158	0.406718	0.367472	0.309522	0.24818	0.175015
158.2	0.406564	0.36792	0.309934	0.248581	0.174921
158.4	0.406825	0.368038	0.309929	0.248784	0.174878
158.6	0.406472	0.368422	0.309838	0.248475	0.174641
158.8	0.406977	0.368496	0.309813	0.24878	0.174948
159	0.406462	0.368292	0.309545	0.248794	0.174555
159.2	0.406302	0.368551	0.309239	0.248753	0.174321
159.4	0.406072	0.368903	0.309479	0.249704	0.174192
159.6	0.406157	0.36878	0.309364	0.249985	0.174134
159.8	0.406642	0.369313	0.309979	0.250796	0.174465
160	0.407147	0.369591	0.310275	0.251508	0.174632
160.2	0.408254	0.370082	0.310527	0.252297	0.175545
160.4	0.408442	0.370203	0.310788	0.252519	0.175959
160.6	0.408751	0.370373	0.311026	0.252622	0.176359
160.8	0.408634	0.370004	0.311007	0.252128	0.176868
161	0.408696	0.36982	0.311407	0.252001	0.176963
161.2	0.408663	0.370031	0.311563	0.251901	0.177124
161.4	0.408297	0.370006	0.311284	0.251635	0.177137
161.6	0.408186	0.369795	0.311487	0.251456	0.176652
161.8	0.408368	0.369953	0.311515	0.251347	0.176786
162	0.40842	0.369844	0.311182	0.250841	0.176408
162.2	0.408446	0.369596	0.310988	0.250907	0.176192
162.4	0.408002	0.369371	0.310625	0.250665	0.175931
162.6	0.40744	0.368816	0.310576	0.249971	0.175644
162.8	0.406761	0.368585	0.310222	0.249711	0.175591
163	0.406377	0.368839	0.310471	0.249621	0.175333
163.2	0.406583	0.369702	0.311004	0.249901	0.175599
163.4	0.406495	0.369415	0.310936	0.249952	0.175324
163.6	0.406715	0.369945	0.310949	0.250409	0.175338
163.8	0.40692	0.369968	0.311118	0.25069	0.175307
164	0.406787	0.370073	0.311229	0.250769	0.175231
164.2	0.406907	0.370078	0.31148	0.25108	0.175916
164.4	0.406377	0.369838	0.311625	0.25065	0.175639
164.6	0.406485	0.369944	0.312236	0.250822	0.176215
164.8	0.40633	0.369625	0.312523	0.250579	0.176216
165	0.405978	0.369187	0.312563	0.25079	0.175845
165.2	0.40624	0.369336	0.312864	0.250856	0.175846
165.4	0.406603	0.369476	0.313213	0.251267	0.176039
165.6	0.406763	0.369649	0.31374	0.251727	0.175996
165.8	0.407211	0.369935	0.313929	0.252079	0.176834
166	0.407318	0.37064	0.31436	0.25235	0.177052
166.2	0.407396	0.370567	0.31458	0.252811	0.177208
166.4	0.407273	0.370577	0.314433	0.252792	0.177411
166.6	0.408168	0.370977	0.314821	0.252987	0.177963
166.8	0.40852	0.371545	0.31446	0.253152	0.178271
167	0.409391	0.371763	0.314629	0.253487	0.178774
167.2	0.409975	0.37166	0.314435	0.253688	0.179203
167.4	0.409943	0.371165	0.313408	0.253235	0.17893
167.6	0.410678	0.371802	0.313201	0.253855	0.179158
167.8	0.410568	0.371799	0.312569	0.25358	0.178886
168	0.410493	0.371565	0.312362	0.253135	0.178769
168.2	0.410807	0.371622	0.312128	0.253265	0.178712
168.4	0.410738	0.371717	0.31238	0.253116	0.178595
168.6	0.410563	0.371453	0.311889	0.253131	0.178419
168.8	0.410352	0.370947	0.311466	0.252951	0.177626
169	0.410562	0.370877	0.31155	0.253453	0.177582
169.2	0.41087	0.370941	0.311843	0.253453	0.177579
169.4	0.411307	0.371281	0.312353	0.2534	0.177817
169.6	0.411563	0.371747	0.312715	0.253618	0.178138
169.8	0.411778	0.372419	0.313597	0.253789	0.178844
170	0.411607	0.373134	0.313701	0.253918	0.178653
170.2	0.411775	0.373455	0.313826	0.25424	0.178941
170.4	0.412068	0.373639	0.313878	0.254421	0.179336
170.6	0.412093	0.373998	0.31412	0.254726	0.17966
170.8	0.411629	0.373876	0.313786	0.254512	0.179408
171	0.411606	0.373606	0.313928	0.254568	0.179435
171.2	0.410976	0.373173	0.313548	0.254151	0.179135
171.4	0.410925	0.373227	0.313481	0.254617	0.179306
171.6	0.411066	0.373533	0.313487	0.255118	0.179191
171.8	0.410474	0.373632	0.313519	0.255301	0.179205
172	0.409799	0.373212	0.313415	0.255302	0.179017
172.2	0.409223	0.373121	0.31316	0.25512	0.178498
172.4	0.40876	0.372921	0.31332	0.25524	0.178849
172.6	0.408207	0.372488	0.313051	0.25529	0.178494
172.8	0.408215	0.372133	0.313228	0.255207	0.178337
173	0.408952	0.371969	0.313847	0.255902	0.178854
173.2	0.40975	0.371964	0.314515	0.255651	0.179202
173.4	0.410017	0.372202	0.315104	0.256124	0.179598
173.6	0.410461	0.372363	0.315614	0.257038	0.180144
173.8	0.410942	0.37295	0.316659	0.257601	0.180807
174	0.411633	0.373204	0.316595	0.257788	0.180982
174.2	0.412239	0.373742	0.316929	0.258276	0.181256
174.4	0.413155	0.373787	0.316836	0.25839	0.181124
174.6	0.413309	0.373788	0.31689	0.2585	0.181027
174.8	0.414212	0.37433	0.317224	0.258689	0.18132
175	0.414706	0.374067	0.316963	0.258264	0.181359
175.2	0.41478	0.374277	0.31663	0.258042	0.181765
175.4	0.415108	0.374451	0.316691	0.258732	0.182051
175.6	0.414364	0.374451	0.316336	0.258302	0.181921
175.8	0.413583	0.374373	0.315983	0.258102	0.182092
176	0.413013	0.373636	0.315029	0.25744	0.181933
176.2	0.412605	0.373415	0.31529	0.256834	0.18226
176.4	0.412866	0.373789	0.315458	0.257135	0.182784
176.6	0.412552	0.373947	0.315572	0.257135	0.182633
176.8	0.412514	0.373744	0.31552	0.257339	0.182624
177	0.412606	0.374003	0.316157	0.257966	0.18265
177.2	0.412185	0.374254	0.316468	0.257776	0.182433
177.4	0.411442	0.374155	0.316351	0.257856	0.182359
177.6	0.411657	0.37425	0.31679	0.258043	0.182334
177.8	0.411497	0.374224	0.317087	0.258194	0.182038
178	0.411412	0.374235	0.316879	0.258055	0.181455
178.2	0.411306	0.374406	0.316532	0.258034	0.1805
178.4	0.411892	0.374387	0.316799	0.258434	0.180337
178.6	0.411714	0.374333	0.316918	0.258443	0.180433
178.8	0.412641	0.37483	0.317254	0.258721	0.180906
179	0.412585	0.374399	0.316858	0.258302	0.180643
179.2	0.412783	0.375028	0.31728	0.258776	0.181591
179.4	0.41263	0.374607	0.317305	0.258659	0.181495
179.6	0.412855	0.374515	0.317388	0.258293	0.181779
179.8	0.413087	0.374504	0.317595	0.258421	0.182318
180	0.413215	0.374437	0.317715	0.258136	0.182609
180.2	0.413115	0.374642	0.318172	0.258122	0.182947
180.4	0.413431	0.374635	0.31778	0.257771	0.182623
180.6	0.413493	0.374771	0.317894	0.258267	0.182775
180.8	0.413458	0.37449	0.317484	0.25828	0.182714
181	0.413733	0.375071	0.317863	0.258504	0.183003
181.2	0.413781	0.375033	0.317723	0.258201	0.18308
181.4	0.414072	0.375265	0.317562	0.258194	0.183385
181.6	0.414069	0.374979	0.317317	0.258253	0.182921
181.8	0.413634	0.374251	0.317049	0.25772	0.182213
182	0.413481	0.374371	0.316989	0.2575	0.181825
182.2	0.413763	0.37464	0.316994	0.257589	0.181667
182.4	0.414049	0.375089	0.317116	0.258196	0.181958
182.6	0.414365	0.375405	0.317112	0.258354	0.182439
182.8	0.414947	0.376048	0.317941	0.258923	0.183365
183	0.414706	0.376623	0.318471	0.259131	0.18413
183.2	0.41437	0.377137	0.318768	0.258792	0.184675
183.4	0.414033	0.377242	0.318906	0.258309	0.184635
183.6	0.41421	0.377377	0.319237	0.258756	0.184824
183.8	0.413613	0.377529	0.319642	0.259051	0.185498
184	0.413183	0.377289	0.319827	0.258955	0.185414
184.2	0.413184	0.377126	0.320059	0.25945	0.185525
184.4	0.413707	0.377456	0.32042	0.260039	0.186294
184.6	0.413978	0.377668	0.320837	0.260933	0.186907
184.8	0.41383	0.377676	0.320526	0.261156	0.186809
185	0.414389	0.377892	0.32093	0.261712	0.187105
185.2	0.414466	0.377956	0.320774	0.261642	0.187154
185.4	0.414267	0.377606	0.320576	0.261736	0.186697
185.6	0.414444	0.377102	0.320421	0.261475	0.185987
185.8	0.414571	0.376665	0.320697	0.261103	0.185519
186	0.415085	0.377001	0.320703	0.261677	0.18515
186.2	0.415482	0.377448	0.320958	0.262173	0.185117
186.4	0.415633	0.377873	0.320906	0.262512	0.185094
186.6	0.416055	0.378315	0.321837	0.262777	0.185792
186.8	0.415666	0.378424	0.321917	0.262195	0.185829
187	0.41571	0.378495	0.321861	0.261652	0.185713
187.2	0.415636	0.378793	0.321495	0.261218	0.185282
187.4	0.416004	0.379088	0.321541	0.26141	0.185529
187.6	0.416518	0.379042	0.321658	0.261808	0.185198
187.8	0.416229	0.379069	0.321853	0.261407	0.185247
188	0.416409	0.378983	0.321974	0.261576	0.185189
188.2	0.417377	0.379441	0.322249	0.26208	0.185681
188.4	0.417945	0.379891	0.322756	0.262525	0.18635
188.6	0.417622	0.379583	0.322233	0.262238	0.186166
188.8	0.417909	0.379962	0.321855	0.261787	0.186028
189	0.418317	0.37984	0.321783	0.261334	0.186036
189.2	0.418515	0.380197	0.321775	0.260925	0.186208
189.4	0.418524	0.379625	0.321701	0.260797	0.185598
189.6	0.418584	0.380094	0.321791	0.261033	0.185526
189.8	0.418343	0.379874	0.321718	0.261045	0.185117
190	0.418479	0.379677	0.321296	0.261664	0.185093
190.2	0.417623	0.379375	0.321132	0.261753	0.185211
190.4	0.417514	0.379588	0.321092	0.261748	0.185111
190.6	0.417303	0.379823	0.320976	0.261994	0.18532
190.8	0.416536	0.37935	0.320253	0.261391	0.18495
191	0.416369	0.379288	0.319989	0.261326	0.184654
191.2	0.415895	0.379288	0.319713	0.26175	0.184469
191.4	0.41525	0.378989	0.319667	0.262087	0.184468
191.6	0.415233	0.378782	0.319878	0.262139	0.184321
191.8	0.41481	0.378939	0.319945	0.262176	0.185014
192	0.414943	0.379017	0.320388	0.26261	0.185733
192.2	0.41563	0.379237	0.32111	0.263041	0.186338
192.4	0.415523	0.379092	0.321629	0.263049	0.186631
192.6	0.415549	0.37936	0.321864	0.262578	0.187228
192.8	0.416184	0.379574	0.322727	0.262518	0.187715
193	0.41669	0.379621	0.323346	0.26274	0.188051
193.2	0.417154	0.380158	0.323903	0.262971	0.188531
193.4	0.417492	0.380259	0.324085	0.263597	0.188822
193.6	0.417749	0.380719	0.324408	0.263952	0.189128
193.8	0.418342	0.380881	0.324761	0.264339	0.189397
194	0.418771	0.380896	0.324542	0.264323	0.189532
194.2	0.418436	0.38102	0.324725	0.26477	0.189729
194.4	0.41898	0.381661	0.324601	0.265081	0.189808
194.6	0.41867	0.38201	0.324117	0.265114	0.190138
194.8	0.418353	0.381713	0.323884	0.2645	0.189766
195	0.418451	0.38147	0.323614	0.264564	0.189412
195.2	0.41821	0.381384	0.323563	0.265033	0.189381
195.4	0.418058	0.381471	0.323548	0.265287	0.189509
195.6	0.418128	0.381273	0.323362	0.265227	0.189732
195.8	0.417876	0.381292	0.323386	0.265341	0.189828
196	0.417898	0.38075	0.323569	0.26549	0.189595
196.2	0.418211	0.380644	0.323575	0.265228	0.189369
196.4	0.418084	0.380424	0.323834	0.265213	0.189322
196.6	0.417995	0.380168	0.324047	0.265034	0.189288
196.8	0.418355	0.379795	0.324322	0.265066	0.189288
197	0.418754	0.380182	0.324497	0.265157	0.189347
197.2	0.418697	0.380457	0.324612	0.265319	0.189509
197.4	0.418402	0.379931	0.324812	0.265204	0.189491
197.6	0.418095	0.37965	0.324923	0.264589	0.189136
197.8	0.417806	0.379736	0.32486	0.264462	0.189083
198	0.417798	0.379723	0.32448	0.264269	0.189191
198.2	0.418083	0.380145	0.324645	0.265033	0.189439
198.4	0.418521	0.380659	0.32424	0.264595	0.189478
198.6	0.418587	0.381206	0.32463	0.264703	0.189798
198.8	0.418871	0.381074	0.324498	0.264492	0.189672
199	0.419213	0.381652	0.324859	0.265103	0.190015
199.2	0.419499	0.382127	0.325177	0.26574	0.190231
199.4	0.419439	0.382464	0.325089	0.265981	0.190436
199.6	0.419325	0.382428	0.324847	0.265967	0.190665
199.8	0.419569	0.382877	0.325404	0.266479	0.191003
200	0.420233	0.38321	0.325213	0.266733	0.191512
200.2	0.420537	0.383753	0.325481	0.266884	0.191891
200.4	0.420281	0.383303	0.325251	0.266613	0.191937
200.6	0.420599	0.383258	0.32539	0.266499	0.192031
200.8	0.42089	0.3836	0.325804	0.266893	0.192667
201	0.420312	0.383759	0.325761	0.2668	0.192634
201.2	0.419766	0.383146	0.325751	0.266571	0.192481
201.4	0.419068	0.382424	0.325385	0.265992	0.192288
201.6	0.419002	0.382339	0.324808	0.265787	0.192046
201.8	0.418473	0.382215	0.324083	0.265625	0.19159
202	0.418599	0.382182	0.323715	0.265434	0.191121
202.2	0.419309	0.382578	0.324075	0.265723	0.190777
202.4	0.419116	0.382327	0.32387	0.265265	0.190564
202.6	0.41909	0.382269	0.324282	0.265557	0.190661
202.8	0.419461	0.382428	0.324711	0.265607	0.190584
203	0.419338	0.382729	0.325607	0.26601	0.190598
203.2	0.419819	0.382989	0.326249	0.266456	0.19062
203.4	0.419573	0.383234	0.326543	0.26636	0.190465
203.6	0.419765	0.382874	0.32694	0.266562	0.19048
203.8	0.419995	0.383383	0.327694	0.267296	0.191079
204	0.420089	0.382953	0.3276	0.267264	0.191444
204.2	0.419882	0.382686	0.328026	0.267228	0.191503
204.4	0.419602	0.382337	0.327319	0.266957	0.191426
204.6	0.420337	0.382357	0.327779	0.267387	0.191808
204.8	0.42042	0.382159	0.327874	0.267863	0.192004
205	0.420086	0.381825	0.3275	0.267654	0.191809
205.2	0.420335	0.381871	0.327782	0.268133	0.192148
205.4	0.420119	0.381718	0.327297	0.267974	0.191941
205.6	0.419818	0.381773	0.326571	0.267813	0.191632
205.8	0.419593	0.381618	0.325863	0.267322	0.191183
206	0.420298	0.3821	0.326313	0.267312	0.191133
206.2	0.4207	0.382538	0.326912	0.267514	0.191567
206.4	0.420786	0.382531	0.326984	0.267473	0.191742
206.6	0.421015	0.383019	0.327437	0.26775	0.192011
206.8	0.421487	0.383317	0.328103	0.267749	0.19203
207	0.42162	0.383617	0.328597	0.268085	0.192143
207.2	0.421909	0.384035	0.328697	0.268352	0.192158
207.4	0.421881	0.384296	0.328833	0.268623	0.192015
207.6	0.422012	0.384614	0.329074	0.269269	0.192475
207.8	0.421973	0.385282	0.329638	0.269938	0.193496
208	0.421933	0.385079	0.329531	0.269685	0.193444
208.2	0.421749	0.385294	0.329514	0.269593	0.193317
208.4	0.421372	0.385085	0.328894	0.269826	0.193417
208.6	0.42144	0.384658	0.328806	0.269835	0.193411
208.8	0.421209	0.384726	0.328758	0.270151	0.193697
209	0.420833	0.38464	0.328224	0.269705	0.193384
209.2	0.420895	0.384678	0.328377	0.269713	0.193112
209.4	0.420709	0.384519	0.328072	0.269532	0.192694
209.6	0.420752	0.384879	0.328135	0.269624	0.192762
209.8	0.420944	0.384887	0.328319	0.269574	0.192417
210	0.421047	0.385276	0.328832	0.269589	0.192683
210.2	0.421014	0.384964	0.328669	0.269233	0.192876
210.4	0.42134	0.384802	0.328497	0.269341	0.192803
210.6	0.421178	0.384294	0.328061	0.26883	0.192146
210.8	0.421784	0.384134	0.328062	0.268695	0.19221
211	0.421871	0.384447	0.328619	0.26891	0.192436
211.2	0.421604	0.384408	0.328205	0.268841	0.192483
211.4	0.421779	0.384732	0.328095	0.268673	0.192725
211.6	0.421824	0.384747	0.328158	0.268773	0.193316
211.8	0.421823	0.384598	0.328181	0.268609	0.193644
212	0.421715	0.384407	0.328036	0.268315	0.193708
212.2	0.420937	0.384437	0.327765	0.268533	0.193789
212.4	0.420794	0.384483	0.327816	0.269026	0.194337
212.6	0.421144	0.385029	0.327922	0.269167	0.195004
212.8	0.42166	0.386102	0.328084	0.269559	0.195622
213	0.421654	0.385939	0.328129	0.269518	0.195354
213.2	0.421531	0.385804	0.328044	0.269778	0.19528
213.4	0.421743	0.386515	0.32861	0.270248	0.195329
213.6	0.422207	0.386909	0.329116	0.270324	0.195142
213.8	0.422374	0.386961	0.329649	0.270372	0.195034
214	0.422363	0.386759	0.329476	0.270249	0.195162
214.2	0.422204	0.385776	0.329284	0.269931	0.194631
214.4	0.42257	0.385803	0.32955	0.269935	0.194052
214.6	0.422381	0.385314	0.329441	0.269654	0.193471
214.8	0.423078	0.385474	0.329926	0.270159	0.193972
215	0.423045	0.385478	0.330094	0.270016	0.193664
215.2	0.423044	0.385377	0.329533	0.270148	0.193355
215.4	0.423457	0.385547	0.329331	0.269782	0.193234
215.6	0.423705	0.38514	0.329185	0.270283	0.193492
215.8	0.424179	0.385658	0.329544	0.270768	0.193726
216	0.424086	0.38598	0.32951	0.271105	0.194128
216.2	0.424505	0.386787	0.329605	0.271764	0.194547
216.4	0.42467	0.387044	0.329319	0.27195	0.195052
216.6	0.424462	0.387782	0.329244	0.271815	0.195472
216.8	0.424193	0.388012	0.329194	0.271912	0.19564
217	0.423172	0.387237	0.328959	0.271159	0.195102
217.2	0.422827	0.387451	0.328801	0.270975	0.194941
217.4	0.423164	0.388151	0.329579	0.270973	0.194977
217.6	0.423628	0.388359	0.329792	0.271093	0.195183
217.8	0.423386	0.387818	0.330249	0.270859	0.195225
218	0.423034	0.38767	0.330165	0.270663	0.195086
218.2	0.423646	0.387758	0.330797	0.270886	0.195114
218.4	0.424405	0.388241	0.33131	0.270949	0.195151
218.6	0.424132	0.387705	0.331177	0.270965	0.195214
218.8	0.424195	0.387735	0.330984	0.270882	0.19531
219	0.424058	0.387614	0.330531	0.270394	0.19473
219.2	0.424118	0.38768	0.330388	0.270514	0.194677
219.4	0.424035	0.38751	0.330192	0.270326	0.194669
219.6	0.424472	0.387348	0.330063	0.270802	0.195093
219.8	0.424502	0.387718	0.330345	0.270846	0.195114
220	0.424598	0.387488	0.330136	0.27126	0.195164
220.2	0.425049	0.388147	0.330502	0.271797	0.195373
220.4	0.424635	0.388132	0.329952	0.271884	0.195048
220.6	0.424194	0.388251	0.330356	0.271803	0.195212
220.8	0.423986	0.388233	0.330556	0.272232	0.195526
221	0.423898	0.388311	0.330623	0.272469	0.195678
221.2	0.423879	0.388824	0.330917	0.273015	0.195928
221.4	0.424234	0.389402	0.331138	0.273506	0.196401
221.6	0.423869	0.389333	0.331227	0.273647	0.196338
221.8	0.423774	0.389064	0.331686	0.27396	0.196222
222	0.424141	0.389789	0.332305	0.27447	0.196774
222.2	0.424417	0.389872	0.332488	0.274867	0.197114
222.4	0.42427	0.389768	0.332209	0.274273	0.196846
222.6	0.423609	0.389631	0.331386	0.273761	0.196804
222.8	0.42325	0.389331	0.330875	0.272896	0.196677
223	0.423268	0.389064	0.330312	0.272087	0.196375
223.2	0.423339	0.389119	0.330237	0.2718	0.196519
223.4	0.422711	0.388253	0.329832	0.271225	0.196159
223.6	0.423112	0.388428	0.329446	0.270822	0.195979
223.8	0.423289	0.388342	0.32955	0.270753	0.195795
224	0.423721	0.388345	0.329342	0.271125	0.195534
224.2	0.423692	0.388622	0.329438	0.271028	0.195562
224.4	0.423766	0.388211	0.328949	0.270645	0.19545
224.6	0.423683	0.387971	0.328895	0.270556	0.195189
224.8	0.423836	0.388067	0.329147	0.27111	0.19524
225	0.424164	0.38792	0.329247	0.271484	0.195557
225.2	0.42402	0.387788	0.329493	0.271825	0.195507
225.4	0.424732	0.388224	0.330408	0.272636	0.196304
225.6	0.424137	0.387569	0.330817	0.272992	0.196312
225.8	0.424748	0.387601	0.331515	0.273841	0.196713
226	0.424967	0.388002	0.332383	0.274726	0.197245
226.2	0.425462	0.388253	0.332386	0.275233	0.197471
226.4	0.426582	0.389191	0.333025	0.275881	0.198027
226.6	0.426514	0.389233	0.333088	0.276035	0.198671
226.8	0.426593	0.38921	0.333506	0.27578	0.199118
227	0.42697	0.389286	0.333689	0.276306	0.199384
227.2	0.427371	0.389655	0.333974	0.276602	0.199738
227.4	0.427259	0.389724	0.3339	0.276408	0.199818
227.6	0.427445	0.390355	0.333742	0.27622	0.199806
227.8	0.427359	0.390374	0.333632	0.276403	0.199883
228	0.426552	0.390315	0.333378	0.276303	0.199733
228.2	0.426332	0.39018	0.333358	0.275625	0.19958
228.4	0.426246	0.390023	0.332948	0.275273	0.199032
228.6	0.426436	0.39019	0.332856	0.275288	0.198678
228.8	0.426383	0.390337	0.333178	0.275123	0.199042
229	0.426311	0.390103	0.332941	0.27504	0.199171
229.2	0.425864	0.389914	0.332791	0.274814	0.199055
229.4	0.425808	0.389878	0.332822	0.274963	0.199147
229.6	0.424772	0.389023	0.332413	0.274353	0.198331
229.8	0.424858	0.388953	0.332642	0.274645	0.198131
230	0.424974	0.389388	0.332872	0.275099	0.19837
230.2	0.42567	0.389505	0.333095	0.275249	0.19893
230.4	0.426259	0.389743	0.333783	0.275994	0.199632
230.6	0.425887	0.38945	0.333728	0.27574	0.199676
230.8	0.426053	0.390075	0.334064	0.275919	0.200076
231	0.426039	0.390115	0.3342	0.275996	0.199989
231.2	0.426212	0.390342	0.334236	0.275855	0.200551
231.4	0.426056	0.390125	0.334011	0.275492	0.200724
231.6	0.425807	0.389896	0.333687	0.275314	0.200561
231.8	0.426005	0.390276	0.333529	0.275575	0.200903
232	0.426168	0.390275	0.333651	0.27527	0.200931
232.2	0.426531	0.390545	0.333824	0.274641	0.200852
232.4	0.426569	0.390351	0.333804	0.274725	0.200572
232.6	0.427096	0.390594	0.334082	0.274709	0.200821
232.8	0.427251	0.390699	0.334295	0.274821	0.200881
233	0.427047	0.390276	0.333792	0.27457	0.200396
233.2	0.427016	0.3901	0.333778	0.27416	0.199891
233.4	0.427398	0.389969	0.334221	0.274104	0.199706
233.6	0.427028	0.389907	0.334903	0.274294	0.199551
233.8	0.427424	0.390073	0.335572	0.275009	0.199836
234	0.427415	0.390497	0.335375	0.275059	0.199844
234.2	0.428057	0.39088	0.335871	0.275699	0.200226
234.4	0.428134	0.391292	0.335957	0.276115	0.200151
234.6	0.428116	0.391665	0.335708	0.275967	0.200079
234.8	0.428514	0.392124	0.336209	0.27641	0.200442
235	0.428395	0.391935	0.336234	0.276534	0.200615
235.2	0.428711	0.391786	0.336235	0.277044	0.201192
235.4	0.428347	0.391693	0.335864	0.277151	0.201322
235.6	0.428407	0.392203	0.335659	0.277705	0.201647
235.8	0.428052	0.39239	0.33507	0.277709	0.201855
236	0.42728	0.391945	0.334741	0.277327	0.2013
236.2	0.426658	0.391782	0.334746	0.277138	0.201088
236.4	0.426926	0.391444	0.334913	0.277789	0.201279
236.6	0.426431	0.391308	0.334997	0.27805	0.201415
236.8	0.426328	0.391155	0.335158	0.278044	0.20157
237	0.426157	0.390877	0.335116	0.277646	0.201335
237.2	0.426528	0.391129	0.335418	0.277464	0.201489
237.4	0.426766	0.39163	0.335943	0.277856	0.201971
237.6	0.426731	0.391996	0.336311	0.278791	0.202256
237.8	0.426952	0.39204	0.336127	0.278812	0.20198
238	0.427019	0.392129	0.335506	0.278592	0.201737
238.2	0.42774	0.392508	0.335974	0.278403	0.202009
238.4	0.427829	0.391843	0.335388	0.277801	0.201561
238.6	0.428568	0.39179	0.335559	0.277543	0.201533
238.8	0.428753	0.391712	0.336064	0.277568	0.201691
239	0.428606	0.391476	0.335647	0.277321	0.201674
239.2	0.428472	0.391508	0.335484	0.277144	0.201444
239.4	0.428228	0.391508	0.335229	0.277102	0.201629
239.6	0.428101	0.391429	0.335125	0.276749	0.201437
239.8	0.427709	0.391187	0.335002	0.276389	0.201101
240	0.427226	0.391558	0.335201	0.276123	0.200903
240.2	0.427773	0.391697	0.335391	0.276176	0.201323
240.4	0.428478	0.391916	0.335708	0.276989	0.201925
240.6	0.428268	0.392057	0.336066	0.276805	0.202076
240.8	0.428856	0.391868	0.33644	0.276822	0.202203
241	0.429501	0.392112	0.336878	0.276838	0.202513
241.2	0.429827	0.391973	0.337227	0.277355	0.202943
241.4	0.429934	0.392085	0.337843	0.278278	0.203413
241.6	0.42997	0.391648	0.337812	0.27897	0.20325
241.8	0.430167	0.391353	0.338027	0.279023	0.20319
242	0.430158	0.391048	0.337975	0.278888	0.203145
242.2	0.430198	0.390928	0.338331	0.278773	0.202986
242.4	0.430153	0.390713	0.338154	0.278767	0.202423
242.6	0.4301	0.390936	0.338425	0.278875	0.202535
242.8	0.429525	0.390876	0.33828	0.278937	0.202512
243	0.429214	0.39112	0.337742	0.278942	0.202351
243.2	0.42876	0.390981	0.337771	0.278492	0.202266
243.4	0.428847	0.391338	0.337712	0.278476	0.202451
243.6	0.429131	0.392004	0.338303	0.278816	0.20283
243.8	0.429438	0.392865	0.338356	0.278937	0.203197
244	0.429911	0.393856	0.338642	0.279122	0.203581
244.2	0.430817	0.394075	0.338731	0.279466	0.203863
244.4	0.431636	0.394943	0.339429	0.280122	0.204301
244.6	0.431959	0.395097	0.339947	0.279464	0.204483
244.8	0.432021	0.39463	0.340082	0.279549	0.204502
245	0.431745	0.394923	0.340257	0.27956	0.204603
245.2	0.43195	0.394843	0.340581	0.280374	0.205097
245.4	0.431522	0.394883	0.340598	0.280833	0.204858
245.6	0.431675	0.395242	0.340322	0.280979	0.204858
245.8	0.431726	0.395658	0.340397	0.280745	0.20522
246	0.43146	0.395753	0.33988	0.280704	0.204756
246.2	0.431381	0.395998	0.339682	0.280921	0.204431
246.4	0.431505	0.396219	0.339016	0.280507	0.204213
246.6	0.431186	0.396235	0.33874	0.280793	0.204456
246.8	0.430679	0.395892	0.338234	0.280555	0.203983
247	0.430308	0.395519	0.337726	0.280322	0.203845
247.2	0.430183	0.394672	0.337211	0.280466	0.203441
247.4	0.430142	0.394684	0.337075	0.280608	0.203317
247.6	0.430371	0.394702	0.337259	0.280851	0.203749
247.8	0.430503	0.394983	0.33704	0.280941	0.203757
248	0.43087	0.395219	0.33743	0.281236	0.20395
248.2	0.430603	0.394888	0.337348	0.281376	0.203865
248.4	0.430872	0.395106	0.338004	0.28158	0.204277
248.6	0.430532	0.394531	0.338234	0.281282	0.204215
248.8	0.430248	0.394383	0.338743	0.281537	0.204392
249	0.429709	0.394083	0.338765	0.281515	0.204367
249.2	0.429889	0.394197	0.338929	0.281814	0.204898
249.4	0.429421	0.393966	0.33866	0.281429	0.204391
249.6	0.429412	0.394089	0.338384	0.280749	0.204702
249.8	0.429152	0.393871	0.338069	0.279974	0.204358
250	0.429474	0.39422	0.338365	0.280312	0.204154
250.2	0.429933	0.395155	0.339027	0.280944	0.204611
250.4	0.430558	0.39546	0.339479	0.280892	0.204761
250.6	0.431026	0.396062	0.340413	0.281486	0.205226
250.8	0.431849	0.396474	0.34112	0.281719	0.205313
251	0.431882	0.396488	0.340977	0.281568	0.205274
251.2	0.432533	0.396695	0.340851	0.282028	0.205228
251.4	0.432959	0.39749	0.341293	0.282172	0.205915
251.6	0.43331	0.398272	0.341514	0.283014	0.206374
251.8	0.433387	0.398524	0.341692	0.283532	0.206232
252	0.433421	0.398442	0.341637	0.283762	0.206182
252.2	0.433317	0.398223	0.341543	0.283951	0.206036
252.4	0.433393	0.397899	0.341449	0.283708	0.205816
252.6	0.432573	0.397263	0.341091	0.28356	0.20532
252.8	0.432004	0.396543	0.340933	0.283379	0.204964
253	0.431452	0.395817	0.340552	0.283587	0.204896
253.2	0.430704	0.395377	0.3397	0.282987	0.204349
253.4	0.430577	0.394704	0.33916	0.282145	0.203767
253.6	0.42986	0.394157	0.338782	0.281615	0.203385
253.8	0.429877	0.394115	0.338727	0.281462	0.203301
254	0.430152	0.394323	0.339082	0.281617	0.203413
254.2	0.430344	0.394718	0.339221	0.281635	0.203575
254.4	0.430873	0.394734	0.339381	0.28158	0.20389
254.6	0.431108	0.394998	0.339563	0.281546	0.20401
254.8	0.431749	0.395412	0.340215	0.281788	0.204233
255	0.431553	0.395794	0.340157	0.281873	0.204547
255.2	0.431888	0.395798	0.34054	0.282451	0.204794
255.4	0.431763	0.395706	0.340637	0.282519	0.204994
255.6	0.431979	0.395806	0.340894	0.283056	0.205208
255.8	0.43179	0.395559	0.340671	0.28282	0.204996
256	0.432095	0.395681	0.340878	0.283014	0.205612
256.2	0.431707	0.395484	0.340289	0.283024	0.205364
256.4	0.431734	0.39553	0.340554	0.283262	0.205707
256.6	0.431637	0.395724	0.340951	0.283892	0.20635
256.8	0.431881	0.396104	0.341532	0.284502	0.20695
257	0.431949	0.396619	0.341847	0.28459	0.207307
257.2	0.431914	0.397077	0.341502	0.284148	0.207257
257.4	0.432096	0.397579	0.341555	0.284439	0.207529
257.6	0.432204	0.397972	0.341778	0.284648	0.207663
257.8	0.432509	0.398144	0.341641	0.284859	0.208079
258	0.432589	0.398229	0.341427	0.284716	0.208151
258.2	0.432728	0.398598	0.341226	0.284918	0.208274
258.4	0.432826	0.398484	0.341179	0.28489	0.208095
258.6	0.432525	0.398171	0.340887	0.284684	0.207493
258.8	0.432681	0.398299	0.341464	0.284765	0.207403
259	0.432114	0.398223	0.341176	0.284657	0.207571
259.2	0.431614	0.397416	0.340757	0.28407	0.206761
259.4	0.431174	0.396936	0.340315	0.283674	0.2064
259.6	0.431204	0.397168	0.340172	0.283822	0.206324
259.8	0.43083	0.396284	0.339781	0.283116	0.205823
260	0.430713	0.39625	0.339995	0.282862	0.206123
260.2	0.430381	0.39629	0.339734	0.282954	0.206224
260.4	0.43124	0.397012	0.34081	0.283296	0.207239
260.6	0.431318	0.397196	0.34133	0.283564	0.207419
260.8	0.431423	0.397742	0.342077	0.283543	0.207539
261	0.431221	0.397341	0.342549	0.283151	0.207223
261.2	0.431204	0.397578	0.342461	0.283035	0.207528
261.4	0.431214	0.39777	0.34257	0.28296	0.207602
261.6	0.432166	0.398034	0.342911	0.282538	0.207682
261.8	0.4323	0.397776	0.343227	0.282456	0.208017
262	0.432788	0.39798	0.343261	0.282381	0.20806
262.2	0.433302	0.398012	0.343132	0.282363	0.207985
262.4	0.43298	0.397521	0.343066	0.281932	0.207464
262.6	0.432993	0.397758	0.342741	0.281988	0.207223
262.8	0.433008	0.397975	0.3432	0.282467	0.207311
263	0.432759	0.39785	0.342725	0.28262	0.207292
263.2	0.432539	0.397408	0.342345	0.282515	0.206902
263.4	0.432281	0.397066	0.34184	0.282262	0.206739
263.6	0.432259	0.39695	0.341513	0.282024	0.206666
263.8	0.432505	0.397103	0.341685	0.282412	0.207281
264	0.432502	0.397653	0.341992	0.28295	0.207822
264.2	0.432872	0.397714	0.342059	0.283724	0.208322
264.4	0.433559	0.398189	0.34254	0.284436	0.208664
264.6	0.433606	0.398194	0.342733	0.284423	0.208616
264.8	0.433395	0.397875	0.342438	0.283784	0.208178
265	0.433149	0.397621	0.342424	0.283533	0.208019
265.2	0.433243	0.39847	0.342453	0.283825	0.208447
265.4	0.433437	0.39886	0.342574	0.283757	0.208389
265.6	0.434165	0.39928	0.343218	0.283915	0.208796
265.8	0.434809	0.39967	0.343877	0.284562	0.20946
266	0.435366	0.400286	0.343982	0.284914	0.209082
266.2	0.435422	0.399852	0.344219	0.284748	0.208853
266.4	0.435333	0.399702	0.344068	0.284845	0.208772
266.6	0.435617	0.400032	0.344226	0.285245	0.208723
266.8	0.435299	0.399919	0.344467	0.285586	0.208943
267	0.435293	0.399752	0.344454	0.285171	0.209001
267.2	0.434797	0.399473	0.34431	0.285111	0.209216
267.4	0.434749	0.3996	0.344341	0.285225	0.20928
267.6	0.434817	0.399383	0.344318	0.28556	0.209428
267.8	0.43514	0.399602	0.344405	0.285936	0.209635
268	0.435134	0.398837	0.344088	0.285701	0.209318
268.2	0.43529	0.398534	0.343922	0.285546	0.209356
268.4	0.435213	0.39863	0.34367	0.285321	0.209228
268.6	0.434779	0.398153	0.343122	0.284702	0.208591
268.8	0.434244	0.397752	0.342925	0.284582	0.208262
269	0.434147	0.397977	0.343096	0.284627	0.208555
269.2	0.434644	0.398517	0.343198	0.284985	0.208784
269.4	0.434875	0.398583	0.343012	0.284615	0.208848
269.6	0.435684	0.39914	0.343877	0.285036	0.209452
269.8	0.436633	0.399442	0.344163	0.28524	0.210082
270	0.436457	0.399437	0.344143	0.285091	0.210195
270.2	0.436046	0.398655	0.343779	0.284844	0.210256
270.4	0.436174	0.399258	0.343647	0.285344	0.210827
270.6	0.436078	0.399689	0.343748	0.285411	0.211145
270.8	0.435639	0.399889	0.343602	0.285693	0.211114
271	0.435681	0.399932	0.343823	0.285602	0.211376
271.2	0.435351	0.399884	0.343754	0.285773	0.211555
271.4	0.435231	0.400066	0.343867	0.2857	0.211564
271.6	0.434959	0.400057	0.343783	0.285786	0.211622
271.8	0.435115	0.400232	0.344368	0.285824	0.211582
272	0.434818	0.399795	0.344421	0.285504	0.211365
272.2	0.435014	0.400229	0.344995	0.285678	0.211452
272.4	0.434633	0.400469	0.344979	0.285888	0.211197
272.6	0.434747	0.400739	0.345602	0.286546	0.211272
272.8	0.435029	0.401272	0.346407	0.286871	0.211641
273	0.435314	0.401389	0.3463	0.286327	0.211275
273.2	0.435964	0.402282	0.346558	0.286564	0.211256
273.4	0.436101	0.402449	0.347137	0.286795	0.211573
273.6	0.436544	0.402944	0.347718	0.287372	0.211922
273.8	0.436516	0.402929	0.347056	0.287214	0.211765
274	0.436119	0.403101	0.346967	0.287447	0.211608
274.2	0.436126	0.40328	0.346835	0.287936	0.211579
274.4	0.436255	0.403552	0.346809	0.288501	0.212042
274.6	0.436322	0.403602	0.346495	0.288494	0.212323
274.8	0.436021	0.403291	0.346398	0.288759	0.211911
275	0.436711	0.403197	0.34668	0.288675	0.212546
275.2	0.436823	0.403145	0.346579	0.288859	0.212473
275.4	0.43664	0.403193	0.346251	0.288729	0.211877
275.6	0.436707	0.403282	0.346061	0.289263	0.211867
275.8	0.436708	0.40294	0.346016	0.288881	0.21161
276	0.436304	0.402206	0.34545	0.288172	0.211519
276.2	0.436646	0.402084	0.345387	0.288337	0.21155
276.4	0.436237	0.401594	0.344988	0.287831	0.211379
276.6	0.436128	0.401162	0.344988	0.287606	0.211033
276.8	0.436284	0.400911	0.344888	0.287052	0.210974
277	0.436061	0.400213	0.344198	0.286251	0.210078
277.2	0.436426	0.40055	0.344419	0.286321	0.210189
277.4	0.436749	0.400364	0.3444	0.286593	0.210297
277.6	0.436473	0.40056	0.344267	0.286807	0.209782
277.8	0.436526	0.400982	0.344532	0.286867	0.209699
278	0.436735	0.401374	0.344918	0.287388	0.210509
278.2	0.436811	0.401221	0.344921	0.287667	0.210965
278.4	0.436619	0.401335	0.344971	0.287589	0.211183
278.6	0.437048	0.401544	0.345551	0.287889	0.211417
278.8	0.437309	0.401826	0.346253	0.288696	0.21181
279	0.43799	0.402536	0.346797	0.289514	0.212619
279.2	0.437434	0.40305	0.346771	0.289829	0.212363
279.4	0.437253	0.403427	0.346462	0.289976	0.212266
279.6	0.436866	0.40321	0.346114	0.29022	0.212345
279.8	0.436373	0.402605	0.345694	0.28962	0.212089
280	0.435902	0.402258	0.345827	0.289158	0.212117
280.2	0.435566	0.402296	0.345697	0.289	0.211578
280.4	0.435301	0.402309	0.345611	0.288906	0.211777
280.6	0.435347	0.402232	0.345447	0.289074	0.211646
280.8	0.4358	0.402082	0.345586	0.289326	0.211853
281	0.43624	0.402151	0.345818	0.2896	0.211563
281.2	0.437051	0.402529	0.346193	0.289863	0.212372
281.4	0.437374	0.402499	0.346411	0.290173	0.212541
281.6	0.437432	0.402403	0.346688	0.289998	0.212539
281.8	0.437902	0.40216	0.34687	0.28956	0.212933
282	0.438074	0.401674	0.346023	0.289223	0.212833
282.2	0.43865	0.401657	0.346371	0.289297	0.213101
282.4	0.439203	0.402244	0.346645	0.289715	0.213676
282.6	0.439602	0.402258	0.346775	0.29002	0.214091
282.8	0.439827	0.403003	0.347406	0.29068	0.215172
283	0.439955	0.403677	0.347658	0.290912	0.21568
283.2	0.440069	0.403829	0.347518	0.290584	0.215441
283.4	0.439949	0.403663	0.347257	0.290297	0.215226
283.6	0.439238	0.403629	0.347267	0.290221	0.214763
283.8	0.438561	0.403918	0.347077	0.289961	0.214434
284	0.437868	0.403993	0.347312	0.28966	0.214112
284.2	0.438182	0.404345	0.34716	0.290024	0.214009
284.4	0.43787	0.40416	0.34725	0.290334	0.214352
284.6	0.437662	0.403973	0.347339	0.29006	0.21427
284.8	0.43771	0.40367	0.347474	0.289895	0.213942
285	0.437763	0.403846	0.348005	0.289744	0.214311
285.2	0.437637	0.403582	0.348016	0.289637	0.214869
285.4	0.43708	0.40301	0.347885	0.289223	0.214711
285.6	0.437038	0.402999	0.347507	0.288903	0.214938
285.8	0.437168	0.403055	0.347647	0.289426	0.2153
286	0.437067	0.403377	0.34745	0.289686	0.215254
286.2	0.437701	0.403608	0.348305	0.290115	0.216063
286.4	0.438019	0.403864	0.348095	0.29038	0.216304
286.6	0.437826	0.403789	0.347919	0.290208	0.216035
286.8	0.437936	0.403663	0.348209	0.28993	0.215773
287	0.438053	0.403682	0.347899	0.289727	0.215099
287.2	0.438233	0.403539	0.34784	0.290221	0.214327
287.4	0.438	0.403649	0.347807	0.290679	0.213691
287.6	0.437824	0.403971	0.347726	0.291344	0.213588
287.8	0.438067	0.404029	0.347772	0.291861	0.213511
288	0.438277	0.403955	0.347579	0.292051	0.213172
288.2	0.438315	0.403918	0.34731	0.292019	0.213102
288.4	0.437829	0.404288	0.347141	0.292152	0.213282
288.6	0.437941	0.404555	0.346797	0.291646	0.213197
288.8	0.437544	0.404034	0.346757	0.291438	0.212841
289	0.437276	0.404387	0.347015	0.291507	0.213053
289.2	0.437313	0.404668	0.346828	0.291638	0.213107
289.4	0.437475	0.405083	0.346965	0.291397	0.213654
289.6	0.43802	0.405444	0.347358	0.291716	0.214165
289.8	0.437928	0.405279	0.347746	0.291534	0.213863
290	0.437912	0.405139	0.347807	0.291035	0.213799
290.2	0.438438	0.404905	0.34817	0.290873	0.214186
290.4	0.438158	0.404719	0.348023	0.2907	0.2138
290.6	0.438252	0.404179	0.347986	0.290429	0.212967
290.8	0.438789	0.404269	0.348249	0.290173	0.212874
291	0.439264	0.404793	0.348585	0.290981	0.213135
291.2	0.439899	0.40524	0.34932	0.291769	0.213635
291.4	0.439957	0.404924	0.349334	0.291872	0.214252
291.6	0.439975	0.404825	0.349568	0.29225	0.215115
291.8	0.440244	0.404682	0.350009	0.292526	0.215643
292	0.440129	0.404284	0.349421	0.292058	0.2156
292.2	0.439816	0.403703	0.349381	0.291466	0.215622
292.4	0.439791	0.403956	0.349184	0.291575	0.215713
292.6	0.439226	0.403295	0.348675	0.291024	0.215252
292.8	0.438913	0.403086	0.349096	0.291169	0.21528
293	0.439427	0.403826	0.3492	0.29159	0.215311
293.2	0.439907	0.404488	0.349155	0.291784	0.215475
293.4	0.439809	0.404414	0.349172	0.291509	0.215551
293.6	0.439548	0.404084	0.348956	0.291026	0.215391
293.8	0.439547	0.404282	0.348944	0.290798	0.215146
294	0.439755	0.404413	0.348971	0.291132	0.215672
294.2	0.439928	0.404603	0.349278	0.291246	0.215884
294.4	0.439764	0.404418	0.349209	0.290991	0.215306
294.6	0.440248	0.404925	0.349156	0.291557	0.215639
294.8	0.440507	0.405499	0.349501	0.291672	0.216219
295	0.440162	0.405634	0.349616	0.292143	0.216459
295.2	0.439522	0.405137	0.349029	0.291974	0.216218
295.4	0.438827	0.404595	0.348754	0.292017	0.21609
295.6	0.438931	0.404726	0.348624	0.292168	0.216031
295.8	0.438659	0.404188	0.348476	0.291722	0.215681
296	0.438496	0.403658	0.348134	0.291794	0.215489
296.2	0.438544	0.403823	0.348393	0.292143	0.215325
296.4	0.437864	0.404	0.347954	0.292611	0.215167
296.6	0.437558	0.40394	0.347663	0.292667	0.215045
296.8	0.437389	0.404035	0.348106	0.292966	0.214769
297	0.437687	0.404432	0.348135	0.292924	0.214836
297.2	0.437786	0.405126	0.347951	0.29275	0.215106
297.4	0.43765	0.405115	0.347873	0.292602	0.215121
297.6	0.43786	0.405471	0.348313	0.292654	0.215635
297.8	0.438314	0.4056	0.348636	0.292804	0.215753
298	0.438514	0.405887	0.348838	0.293019	0.216343
298.2	0.439099	0.40629	0.349252	0.292875	0.216771
298.4	0.439462	0.406422	0.349521	0.293058	0.216944
298.6	0.439911	0.407061	0.349881	0.293836	0.217667
298.8	0.440016	0.407069	0.350156	0.293859	0.217713
299	0.43967	0.40724	0.350066	0.294041	0.217495
299.2	0.440014	0.407345	0.350283	0.294302	0.217631
299.4	0.440269	0.40779	0.350768	0.294804	0.217856
299.6	0.440681	0.407774	0.35081	0.295184	0.218187
299.8	0.440644	0.407308	0.351165	0.295439	0.218098
300	0.440448	0.407187	0.351197	0.296203	0.21815
300.2	0.440223	0.406733	0.350979	0.296021	0.217669
300.4	0.439785	0.406265	0.350988	0.295596	0.217258
300.6	0.439682	0.405747	0.351125	0.294926	0.216512
300.8	0.43966	0.405347	0.351418	0.294431	0.216068
301	0.439937	0.405527	0.351471	0.294018	0.216301
301.2	0.439725	0.405529	0.351002	0.294033	0.216034
301.4	0.439373	0.405089	0.350748	0.29366	0.215715
301.6	0.439538	0.404665	0.350771	0.293089	0.215458
301.8	0.439704	0.404351	0.350275	0.292701	0.215518
302	0.439968	0.404702	0.350229	0.292621	0.215617
302.2	0.440261	0.404773	0.350125	0.292457	0.215645
302.4	0.440454	0.404842	0.350205	0.292683	0.215857
302.6	0.441112	0.405078	0.350277	0.292681	0.216358
302.8	0.441182	0.405002	0.350463	0.292996	0.216756
303	0.441314	0.405488	0.35041	0.2933	0.216792
303.2	0.441713	0.406073	0.350657	0.293991	0.217107
303.4	0.441552	0.406553	0.350227	0.294386	0.217063
303.6	0.441712	0.406476	0.350035	0.294575	0.217269
303.8	0.441042	0.40633	0.3499	0.294084	0.2171
304	0.440802	0.406327	0.349682	0.294118	0.217277
304.2	0.440735	0.406183	0.350028	0.29372	0.217318
304.4	0.441142	0.406879	0.350803	0.294028	0.21775
304.6	0.44088	0.40696	0.350867	0.294071	0.217832
304.8	0.441485	0.407028	0.350972	0.294485	0.217999
305	0.441548	0.407353	0.351212	0.295187	0.218663
305.2	0.44109	0.406957	0.350868	0.295082	0.218332
305.4	0.441279	0.407007	0.35094	0.295091	0.218308
305.6	0.44146	0.407258	0.351157	0.29555	0.218481
305.8	0.441812	0.407544	0.351544	0.296516	0.218945
306	0.442174	0.40786	0.351917	0.297362	0.219248
306.2	0.442177	0.407668	0.352094	0.297646	0.219579
306.4	0.442149	0.406926	0.351952	0.29722	0.219564
306.6	0.442698	0.407051	0.352256	0.297321	0.219861
306.8	0.442071	0.406954	0.352131	0.29713	0.219493
307	0.442299	0.40749	0.352067	0.297035	0.21929
307.2	0.442306	0.40752	0.351956	0.296635	0.219205
307.4	0.441997	0.407529	0.351952	0.295972	0.219511
307.6	0.441709	0.406694	0.351979	0.294928	0.219424
307.8	0.441207	0.406389	0.351872	0.294331	0.219299
308	0.441399	0.406184	0.352053	0.294339	0.219306
308.2	0.441277	0.406041	0.352022	0.293921	0.219207
308.4	0.441366	0.405881	0.352165	0.294001	0.219188
308.6	0.441125	0.405666	0.351815	0.29371	0.218926
308.8	0.441488	0.405664	0.351681	0.29375	0.218551
309	0.441178	0.405743	0.351622	0.293657	0.218441
309.2	0.440357	0.404888	0.350729	0.292596	0.217342
309.4	0.440588	0.405408	0.350753	0.292807	0.21734
309.6	0.440252	0.405345	0.350603	0.29277	0.21705
309.8	0.440591	0.405149	0.350602	0.293156	0.21686
310	0.440369	0.405124	0.35035	0.293032	0.216519
310.2	0.439745	0.404665	0.349853	0.292738	0.215773
310.4	0.439191	0.404164	0.349055	0.292585	0.214807
310.6	0.43954	0.405139	0.349333	0.293229	0.214898
310.8	0.43958	0.405982	0.34933	0.29339	0.21531
311	0.440286	0.407114	0.350009	0.294506	0.216027
311.2	0.440697	0.407554	0.350415	0.29504	0.216542
311.4	0.440717	0.407523	0.350638	0.295234	0.216852
311.6	0.441217	0.407261	0.350877	0.29515	0.217044
311.8	0.441743	0.407911	0.351371	0.295955	0.217668
312	0.442038	0.408326	0.352106	0.296349	0.218255
312.2	0.442178	0.408448	0.352322	0.296545	0.218623
312.4	0.442828	0.409087	0.35369	0.297189	0.219524
312.6	0.443232	0.409726	0.353831	0.297013	0.219756
312.8	0.443321	0.409541	0.354095	0.296823	0.219996
313	0.443058	0.409658	0.354247	0.29634	0.22011
313.2	0.442986	0.409598	0.354318	0.295882	0.220472
313.4	0.442934	0.409903	0.354433	0.295767	0.220517
313.6	0.442441	0.409615	0.354153	0.295188	0.219877
313.8	0.442305	0.409265	0.353832	0.29546	0.219595
314	0.441898	0.40955	0.353834	0.295505	0.219069
314.2	0.441406	0.408996	0.353237	0.295638	0.218535
314.4	0.441513	0.40949	0.35312	0.29606	0.218867
314.6	0.441348	0.409951	0.353468	0.29638	0.219631
314.8	0.441748	0.410284	0.353709	0.296674	0.219985
315	0.441654	0.410048	0.353781	0.297176	0.220133
315.2	0.441592	0.40942	0.353425	0.29706	0.22023
315.4	0.441115	0.408595	0.352738	0.296679	0.220132
315.6	0.441859	0.408857	0.35304	0.29695	0.221081
315.8	0.441955	0.409162	0.353502	0.297521	0.221686
316	0.441929	0.409139	0.353848	0.2979	0.221747
316.2	0.442256	0.409042	0.353778	0.298078	0.221982
316.4	0.443069	0.40934	0.354483	0.298686	0.222923
316.6	0.44315	0.409237	0.354255	0.298604	0.222872
316.8	0.443215	0.409029	0.354253	0.298375	0.223322
317	0.443093	0.409302	0.353727	0.298016	0.222999
317.2	0.442963	0.408935	0.353067	0.297793	0.222673
317.4	0.442317	0.40859	0.352482	0.297144	0.221733
317.6	0.441634	0.40815	0.352332	0.296466	0.220853
317.8	0.441685	0.408124	0.352442	0.296529	0.220632
318	0.441859	0.408153	0.352599	0.296161	0.219997
318.2	0.442253	0.407894	0.352455	0.296132	0.219666
318.4	0.442542	0.408208	0.352755	0.29592	0.219498
318.6	0.442295	0.407817	0.353176	0.295712	0.219144
318.8	0.442854	0.408044	0.353443	0.295693	0.218831
319	0.442538	0.408257	0.353583	0.295813	0.218895
319.2	0.442451	0.408176	0.353706	0.295532	0.218554
319.4	0.442449	0.408558	0.354116	0.296013	0.218736
319.6	0.442586	0.409041	0.354873	0.29667	0.219405
319.8	0.442305	0.409163	0.355271	0.296716	0.219431
320	0.442429	0.409527	0.355526	0.297299	0.219861
320.2	0.442835	0.409776	0.355583	0.297512	0.22058
320.4	0.443109	0.409865	0.355807	0.297717	0.220913
320.6	0.443139	0.409906	0.355792	0.29815	0.220943
320.8	0.443044	0.41023	0.355401	0.29786	0.221371
321	0.442895	0.409957	0.354846	0.297804	0.221252
321.2	0.442526	0.409498	0.354295	0.297053	0.220938
321.4	0.442057	0.409141	0.354166	0.296949	0.220769
321.6	0.441823	0.409003	0.35402	0.29701	0.220618
321.8	0.442723	0.409258	0.353959	0.297377	0.220383
322	0.442982	0.408931	0.353438	0.297442	0.220045
322.2	0.443796	0.40953	0.353766	0.297792	0.220241
322.4	0.443764	0.409839	0.353907	0.297751	0.220256
322.6	0.443784	0.410163	0.354703	0.298037	0.220702
322.8	0.44353	0.410478	0.354263	0.298012	0.220463
323	0.443723	0.41086	0.354512	0.297964	0.220967
323.2	0.443761	0.411242	0.355092	0.298011	0.221255
323.4	0.443665	0.411568	0.355528	0.298596	0.221419
323.6	0.443737	0.411613	0.356075	0.298976	0.221889
323.8	0.443735	0.411641	0.356093	0.298754	0.222261
324	0.44368	0.411485	0.356038	0.298653	0.222522
324.2	0.443424	0.411344	0.356164	0.298318	0.222437
324.4	0.443364	0.410925	0.355978	0.298073	0.222373
324.6	0.443647	0.410806	0.355943	0.298358	0.222412
324.8	0.443654	0.410986	0.355676	0.297803	0.222274
325	0.4442	0.410493	0.355797	0.298306	0.222288
325.2	0.444527	0.410186	0.355799	0.297869	0.222062
325.4	0.444726	0.409976	0.355619	0.298467	0.221931
325.6	0.445052	0.410024	0.35544	0.298485	0.221408
325.8	0.445914	0.41042	0.35571	0.299028	0.221314
326	0.445992	0.410148	0.355431	0.299	0.221485
326.2	0.446723	0.410482	0.355954	0.299105	0.221734
326.4	0.446359	0.410635	0.355935	0.299219	0.221904
326.6	0.446697	0.410747	0.356315	0.299108	0.222234
326.8	0.446821	0.411248	0.355766	0.29892	0.222465
327	0.446817	0.411619	0.356227	0.299012	0.222897
327.2	0.446323	0.411665	0.356383	0.299147	0.222815
327.4	0.446363	0.411899	0.356459	0.299356	0.22305
327.6	0.446265	0.412105	0.356344	0.2995	0.223276
327.8	0.445209	0.411953	0.355891	0.298698	0.222982
328	0.444596	0.412125	0.355899	0.29861	0.22276
328.2	0.443967	0.411833	0.355527	0.298055	0.222421
328.4	0.444245	0.411597	0.355265	0.298159	0.222331
328.6	0.444017	0.411553	0.355057	0.298225	0.222028
328.8	0.444249	0.411587	0.355063	0.298358	0.222073
329	0.44459	0.411715	0.355677	0.299081	0.222569
329.2	0.444881	0.41186	0.355881	0.298925	0.223074
329.4	0.444582	0.411268	0.35511	0.299295	0.222447
329.6	0.44484	0.411572	0.355046	0.299458	0.222396
329.8	0.445324	0.412163	0.35548	0.299708	0.222811
330	0.445627	0.411931	0.355665	0.299902	0.223366
330.2	0.446147	0.412411	0.356095	0.300444	0.223834
330.4	0.446025	0.41256	0.356041	0.300682	0.224178
330.6	0.446275	0.412298	0.356292	0.300581	0.224288
330.8	0.446079	0.412388	0.356197	0.30054	0.224078
331	0.445507	0.412059	0.355909	0.300437	0.223585
331.2	0.445605	0.412215	0.356164	0.300453	0.223974
331.4	0.445979	0.412703	0.356822	0.300617	0.224064
331.6	0.445533	0.412134	0.356509	0.300434	0.22315
331.8	0.444895	0.411467	0.35686	0.300237	0.222769
332	0.445036	0.411194	0.35692	0.300811	0.222432
332.2	0.445283	0.410081	0.356275	0.300284	0.221982
332.4	0.445453	0.410059	0.356715	0.300695	0.221834
332.6	0.445109	0.409991	0.35648	0.30063	0.22171
332.8	0.445536	0.41006	0.356679	0.300476	0.221602
333	0.445359	0.410223	0.357101	0.300621	0.221709
333.2	0.445285	0.40991	0.357081	0.300639	0.221773
333.4	0.445006	0.409556	0.3567	0.300433	0.221148
333.6	0.445483	0.410564	0.357344	0.300495	0.221744
333.8	0.445777	0.41101	0.357819	0.30054	0.22229
334	0.445988	0.410828	0.358159	0.300864	0.22299
334.2	0.44595	0.411003	0.357729	0.300667	0.222879
334.4	0.446234	0.410837	0.357724	0.30015	0.223286
334.6	0.446375	0.410464	0.357276	0.299883	0.223433
334.8	0.446586	0.410719	0.35742	0.29967	0.223824
335	0.446207	0.410777	0.357648	0.299513	0.224215
335.2	0.445587	0.410328	0.357485	0.299328	0.224325
335.4	0.445825	0.410171	0.357485	0.299379	0.224292
335.6	0.44541	0.409524	0.356855	0.298901	0.223771
335.8	0.444723	0.408955	0.35625	0.298348	0.223381
336	0.444184	0.408998	0.355444	0.298317	0.222761
336.2	0.443802	0.409012	0.355037	0.298033	0.222693
336.4	0.443891	0.40962	0.355303	0.298237	0.222496
336.6	0.443835	0.41001	0.35494	0.298164	0.222605
336.8	0.444034	0.410484	0.354879	0.297958	0.22268
337	0.443341	0.410269	0.354292	0.297787	0.222249
337.2	0.443159	0.41037	0.354425	0.29812	0.222265
337.4	0.443402	0.410874	0.354574	0.298395	0.222152
337.6	0.443943	0.411842	0.355435	0.299227	0.222606
337.8	0.444074	0.412089	0.355712	0.29996	0.22293
338	0.444625	0.412418	0.356359	0.300737	0.223503
338.2	0.445165	0.412804	0.3564	0.301367	0.223646
338.4	0.446098	0.413101	0.357117	0.302031	0.224639
338.6	0.446501	0.413344	0.357463	0.303024	0.225197
338.8	0.446594	0.41344	0.358296	0.303357	0.225481
339	0.446293	0.413138	0.358385	0.303373	0.225069
339.2	0.446508	0.412788	0.357942	0.303084	0.224407
339.4	0.447226	0.413335	0.358573	0.302793	0.224486
339.6	0.446491	0.413007	0.358312	0.301975	0.223834
339.8	0.446662	0.413142	0.358339	0.301849	0.223926
340	0.446707	0.413358	0.358584	0.301976	0.224035
340.2	0.447488	0.413919	0.359034	0.302109	0.224373
340.4	0.448006	0.414226	0.359206	0.302098	0.224855
340.6	0.447588	0.414258	0.358669	0.302111	0.225099
340.8	0.44732	0.414355	0.358149	0.301343	0.225079
341	0.446917	0.4139	0.357979	0.300972	0.224965
341.2	0.446531	0.413728	0.357976	0.300799	0.224999
341.4	0.446326	0.413529	0.357783	0.300454	0.22445
341.6	0.446152	0.413668	0.358022	0.300687	0.225026
341.8	0.445987	0.413284	0.35769	0.300553	0.225292
342	0.445914	0.413481	0.357713	0.300602	0.225598
342.2	0.44626	0.413865	0.357751	0.30071	0.225824
342.4	0.44611	0.41358	0.357758	0.300353	0.225462
342.6	0.445683	0.413286	0.357872	0.300294	0.224871
342.8	0.44541	0.413239	0.357649	0.299651	0.224102
343	0.445594	0.413508	0.357575	0.299186	0.223447
343.2	0.445927	0.413756	0.357761	0.29875	0.223426
343.4	0.446423	0.41447	0.358581	0.299214	0.224248
343.6	0.446849	0.41464	0.359105	0.299448	0.224648
343.8	0.44777	0.415161	0.359671	0.30018	0.225346
344	0.447788	0.415193	0.359746	0.300509	0.225287
344.2	0.448024	0.415161	0.359729	0.300979	0.225403
344.4	0.447682	0.414823	0.359445	0.301193	0.22584
344.6	0.447247	0.414341	0.359127	0.301281	0.225647
344.8	0.447548	0.41436	0.35939	0.301207	0.225795
345	0.447631	0.413848	0.359217	0.30149	0.225962
345.2	0.447189	0.413357	0.358392	0.30104	0.225281
345.4	0.447568	0.413268	0.357958	0.301334	0.225464
345.6	0.447328	0.413192	0.357591	0.301606	0.22586
345.8	0.447389	0.413454	0.357567	0.301802	0.225935
346	0.446908	0.413654	0.357334	0.301647	0.225771
346.2	0.447574	0.414133	0.357814	0.302004	0.226063
346.4	0.447264	0.413579	0.357642	0.301505	0.225559
346.6	0.447781	0.414173	0.358152	0.30204	0.226122
346.8	0.448366	0.41452	0.358528	0.302043	0.226394
347	0.448869	0.414913	0.358963	0.301781	0.226595
347.2	0.448961	0.415151	0.35985	0.302285	0.227114
347.4	0.449208	0.415346	0.360392	0.302671	0.227241
347.6	0.449026	0.415191	0.360454	0.302139	0.226899
347.8	0.44834	0.415017	0.360098	0.30199	0.226598
348	0.447859	0.41437	0.359917	0.301923	0.226367
348.2	0.447201	0.413725	0.359568	0.301713	0.226273
348.4	0.446776	0.413795	0.359644	0.301641	0.226326
348.6	0.446055	0.413775	0.359105	0.301391	0.226037
348.8	0.445931	0.413636	0.358741	0.301268	0.225722
349	0.445868	0.413457	0.358206	0.300842	0.225749
349.2	0.445186	0.413316	0.357767	0.30039	0.225301
349.4	0.44492	0.413302	0.357207	0.300463	0.225708
349.6	0.445107	0.413444	0.357554	0.300731	0.226054
349.8	0.445824	0.414293	0.358267	0.301382	0.22685
350	0.445505	0.414407	0.358311	0.301129	0.226903
350.2	0.445925	0.414531	0.358637	0.301635	0.227065
350.4	0.44636	0.414456	0.358978	0.301476	0.227293
350.6	0.447273	0.415062	0.359694	0.302164	0.227729
350.8	0.447945	0.415164	0.360155	0.302099	0.227652
351	0.447904	0.415281	0.360138	0.301795	0.227203
351.2	0.44769	0.415062	0.360104	0.302213	0.227333
351.4	0.447743	0.414835	0.359746	0.301956	0.226741
351.6	0.447798	0.415013	0.360108	0.302059	0.227023
351.8	0.447617	0.414993	0.360014	0.302193	0.226848
352	0.447689	0.41465	0.360061	0.302342	0.22694
352.2	0.447597	0.41463	0.360043	0.302262	0.226865
352.4	0.447261	0.414704	0.360169	0.301993	0.226802
352.6	0.447068	0.414404	0.359289	0.301321	0.22631
352.8	0.446876	0.414149	0.359052	0.300706	0.226106
353	0.447028	0.414125	0.358939	0.300288	0.22634
353.2	0.446694	0.413921	0.358939	0.299969	0.22653
353.4	0.447528	0.414113	0.359056	0.300354	0.227213
353.6	0.448103	0.414392	0.359544	0.300578	0.227577
353.8	0.448145	0.414738	0.359985	0.300699	0.227582
354	0.447722	0.41422	0.359732	0.300276	0.227036
354.2	0.448162	0.414041	0.359785	0.300888	0.226905
354.4	0.448544	0.414111	0.360076	0.301008	0.227056
354.6	0.448943	0.414348	0.360035	0.301708	0.227065
354.8	0.448897	0.413991	0.359684	0.302185	0.227069
355	0.448097	0.413752	0.35936	0.302233	0.226954
355.2	0.448567	0.414149	0.359518	0.303095	0.227468
355.4	0.4489	0.414173	0.359462	0.303762	0.227081
355.6	0.449121	0.414509	0.360042	0.304146	0.227327
355.8	0.44878	0.414284	0.359626	0.304067	0.226867
356	0.448975	0.414499	0.360081	0.304292	0.227269
356.2	0.449039	0.414709	0.359806	0.304322	0.227127
356.4	0.44893	0.415016	0.359669	0.3042	0.227028
356.6	0.449192	0.415294	0.359398	0.303895	0.227181
356.8	0.448496	0.41537	0.359176	0.303394	0.227235
357	0.448481	0.41531	0.359091	0.303257	0.227549
357.2	0.448414	0.415715	0.3592	0.303154	0.228184
357.4	0.448437	0.415905	0.359154	0.303223	0.228068
357.6	0.448114	0.41621	0.358898	0.302713	0.227648
357.8	0.448182	0.415882	0.358891	0.302654	0.227536
358	0.448361	0.415578	0.358799	0.302756	0.227587
358.2	0.448531	0.415663	0.359006	0.303103	0.227685
358.4	0.448513	0.415644	0.359061	0.302984	0.227793
358.6	0.448848	0.415818	0.359262	0.303382	0.228095
358.8	0.449026	0.415931	0.359471	0.303515	0.228501
359	0.449314	0.41635	0.359872	0.303337	0.228836
359.2	0.450348	0.416948	0.360414	0.3038	0.229341
359.4	0.450836	0.417172	0.360745	0.3039	0.229479
359.6	0.451231	0.417748	0.361558	0.303845	0.229874
359.8	0.451591	0.418099	0.361851	0.303828	0.230219
360	0.451591	0.418099	0.361851	0.303828	0.230219
360.2	0.449191	0.416871	0.360158	0.303233	0.2295
360.4	0.446423	0.415338	0.358458	0.302892	0.228929
360.6	0.443616	0.413289	0.356748	0.302048	0.228252
360.8	0.440174	0.411095	0.354357	0.301235	0.227032
361	0.437044	0.409395	0.352498	0.300664	0.226093
361.2	0.433652	0.407094	0.350504	0.299658	0.225156
361.4	0.430648	0.404912	0.348749	0.299097	0.224377
361.6	0.427111	0.402713	0.346811	0.297911	0.223724
361.8	0.423841	0.400373	0.345361	0.296818	0.22319
362	0.420992	0.398027	0.343847	0.2959	0.222676
362.2	0.41839	0.395417	0.342587	0.294776	0.221967
362.4	0.416007	0.393124	0.341955	0.294076	0.221962
362.6	0.413492	0.391164	0.340782	0.293241	0.221495
362.8	0.410793	0.389292	0.33955	0.29214	0.221072
363	0.408077	0.386836	0.337982	0.290193	0.220158
363.2	0.40624	0.385133	0.337239	0.289616	0.22024
363.4	0.403778	0.38339	0.336075	0.288686	0.220222
363.6	0.401894	0.381928	0.335569	0.288132	0.220295
363.8	0.39935	0.380224	0.334139	0.287422	0.220028
364	0.397144	0.378805	0.333183	0.286647	0.220035
364.2	0.394675	0.377231	0.331983	0.285576	0.21967
364.4	0.392874	0.375667	0.330889	0.284763	0.219329
364.6	0.391	0.374258	0.330031	0.284105	0.219434
364.8	0.388651	0.373132	0.328682	0.283597	0.21859
365	0.387268	0.372442	0.328307	0.283247	0.218476
365.2	0.385694	0.370988	0.327584	0.282834	0.21832
365.4	0.384279	0.36983	0.326875	0.282674	0.217827
365.6	0.382076	0.368528	0.325532	0.281556	0.217214
365.8	0.380583	0.366667	0.324303	0.280761	0.216338
366	0.379425	0.365606	0.323439	0.280767	0.215737
366.2	0.37818	0.364225	0.322785	0.280352	0.215181
366.4	0.377396	0.363493	0.322555	0.280361	0.215317
366.6	0.376206	0.362771	0.322033	0.280088	0.215162
366.8	0.374623	0.361991	0.321099	0.279658	0.214485
367	0.373491	0.360719	0.320165	0.278888	0.21413
367.2	0.371658	0.359795	0.3193	0.278295	0.213736
367.4	0.369709	0.358647	0.318133	0.277421	0.213355
367.6	0.368568	0.357631	0.318114	0.277045	0.213127
367.8	0.367464	0.357061	0.317643	0.27653	0.213023
368	0.365841	0.355371	0.316799	0.275418	0.21259
368.2	0.364645	0.354148	0.316169	0.27431	0.211729
368.4	0.363932	0.353582	0.316032	0.273766	0.212035
368.6	0.362536	0.352803	0.315981	0.27312	0.212094
368.8	0.361358	0.351615	0.315373	0.272249	0.211479
369	0.360876	0.350677	0.315006	0.271814	0.211451
369.2	0.360354	0.349809	0.314579	0.271429	0.211321
369.4	0.359541	0.349081	0.313726	0.271132	0.210991
369.6	0.358707	0.348568	0.313001	0.270839	0.210915
369.8	0.358042	0.348123	0.313012	0.270755	0.210978
370	0.357696	0.348174	0.312926	0.271022	0.211486
370.2	0.356513	0.347164	0.312004	0.270298	0.211446
370.4	0.355369	0.346488	0.311241	0.270068	0.211597
370.6	0.354187	0.345967	0.310254	0.269627	0.211444
370.8	0.352462	0.344992	0.308832	0.269132	0.210743
371	0.351158	0.343568	0.307674	0.26843	0.210435
371.2	0.349305	0.342372	0.306595	0.267949	0.210016
371.4	0.347921	0.341523	0.306116	0.267725	0.209826
371.6	0.347083	0.34055	0.305844	0.267815	0.209262
371.8	0.345645	0.339404	0.304875	0.267516	0.208768
372	0.343968	0.338069	0.303932	0.26701	0.207969
372.2	0.343257	0.337438	0.303509	0.266541	0.207524
372.4	0.342296	0.336719	0.30285	0.265892	0.207493
372.6	0.341226	0.335835	0.301978	0.265069	0.206635
372.8	0.340496	0.33488	0.300845	0.264813	0.206221
373	0.340438	0.334409	0.30045	0.264891	0.205968
373.2	0.340368	0.33432	0.3005	0.265116	0.206194
373.4	0.339934	0.334164	0.300428	0.265721	0.20626
373.6	0.339598	0.334289	0.300873	0.266034	0.206174
373.8	0.339161	0.334213	0.301208	0.266082	0.206478
374	0.338527	0.333967	0.300775	0.265819	0.206692
374.2	0.337783	0.333378	0.300476	0.265431	0.206748
374.4	0.33736	0.332765	0.300162	0.265058	0.206947
374.6	0.337288	0.332498	0.300043	0.2646	0.20685
374.8	0.336407	0.33171	0.299689	0.26438	0.206505
375	0.335769	0.331191	0.29933	0.264169	0.2067
375.2	0.335254	0.330868	0.299222	0.263907	0.206655
375.4	0.335071	0.330433	0.299104	0.263592	0.206365
375.6	0.334178	0.329419	0.298373	0.262934	0.205898
375.8	0.332881	0.328098	0.297324	0.262126	0.205467
376	0.332309	0.327687	0.297019	0.261527	0.205471
376.2	0.331444	0.326591	0.296012	0.260404	0.205405
376.4	0.331037	0.326425	0.295841	0.259959	0.205994
376.6	0.329975	0.325694	0.294802	0.25912	0.205508
376.8	0.329598	0.324938	0.294473	0.259233	0.205495
377	0.329201	0.324275	0.294463	0.258921	0.205407
377.2	0.329059	0.324212	0.294176	0.259323	0.205587
377.4	0.328401	0.324085	0.294027	0.259601	0.20533
377.6	0.328045	0.323895	0.294045	0.25937	0.205226
377.8	0.327531	0.32371	0.293954	0.259313	0.205537
378	0.326261	0.322687	0.29303	0.258375	0.204831
378.2	0.326154	0.322234	0.292679	0.258312	0.204647
378.4	0.325616	0.32123	0.29191	0.257716	0.204163
378.6	0.325272	0.321083	0.291801	0.257814	0.203793
378.8	0.324653	0.320506	0.291177	0.25751	0.20314
379	0.323872	0.319974	0.290651	0.257497	0.202774
379.2	0.323956	0.31939	0.290944	0.257571	0.202626
379.4	0.322858	0.318237	0.289998	0.256976	0.201788
379.6	0.321635	0.317506	0.289323	0.256194	0.201363
379.8	0.32125	0.316724	0.288719	0.255883	0.20129
380	0.320492	0.316759	0.288366	0.255409	0.201009
380.2	0.319371	0.316577	0.287846	0.254679	0.200877
380.4	0.318897	0.316715	0.287801	0.254753	0.201148
380.6	0.317619	0.315754	0.287044	0.254225	0.200532
380.8	0.317366	0.315361	0.287126	0.254542	0.200718
381	0.316642	0.314823	0.28646	0.254166	0.2004
381.2	0.316579	0.315172	0.286022	0.254534	0.20051
381.4	0.316013	0.314827	0.285915	0.254067	0.200564
381.6	0.315273	0.314815	0.285534	0.253662	0.200256
381.8	0.314472	0.314287	0.284787	0.253358	0.199852
382	0.313526	0.313601	0.283943	0.252666	0.199215
382.2	0.313593	0.313313	0.284048	0.252843	0.199432
382.4	0.312808	0.312202	0.283296	0.2521	0.198902
382.6	0.312608	0.312271	0.283312	0.251717	0.199204
382.8	0.312055	0.312036	0.282767	0.251605	0.199036
383	0.311513	0.311804	0.282791	0.251871	0.199239
383.2	0.31122	0.311578	0.28342	0.251905	0.199285
383.4	0.310364	0.311007	0.282479	0.251084	0.198797
383.6	0.31032	0.31108	0.282474	0.250456	0.198734
383.8	0.309901	0.310743	0.282223	0.250233	0.198476
384	0.309049	0.310311	0.281512	0.249653	0.197792
384.2	0.308473	0.309752	0.28153	0.24953	0.198038
384.4	0.307765	0.30888	0.281201	0.249465	0.197786
384.6	0.307403	0.308395	0.281374	0.249541	0.197996
384.8	0.307877	0.308071	0.281764	0.249729	0.198061
385	0.308077	0.307624	0.281563	0.249732	0.197981
385.2	0.308306	0.30746	0.281271	0.249883	0.197851
385.4	0.307818	0.306945	0.28081	0.249614	0.197638
385.6	0.306898	0.306315	0.28011	0.249282	0.19703
385.8	0.306618	0.305402	0.279303	0.248843	0.196535
386	0.305886	0.304684	0.278669	0.248255	0.196235
386.2	0.305483	0.303809	0.278128	0.247899	0.196093
386.4	0.304802	0.303396	0.277061	0.247255	0.195829
386.6	0.3046	0.303761	0.276779	0.247011	0.196212
386.8	0.303932	0.303626	0.276285	0.246998	0.195855
387	0.303631	0.303432	0.276332	0.246654	0.195742
387.2	0.302956	0.303312	0.275924	0.246205	0.195336
387.4	0.302199	0.302955	0.275387	0.245339	0.195166
387.6	0.301601	0.302484	0.275171	0.244712	0.194875
387.8	0.300585	0.301882	0.274665	0.244253	0.194432
388	0.299933	0.301373	0.274068	0.243874	0.194136
388.2	0.29928	0.300812	0.274219	0.243573	0.194113
388.4	0.298657	0.300552	0.274153	0.243241	0.193355
388.6	0.298408	0.300306	0.274392	0.243168	0.193293
388.8	0.298322	0.299961	0.27453	0.243288	0.192999
389	0.297683	0.299373	0.273886	0.243055	0.192771
389.2	0.297172	0.298629	0.273178	0.242779	0.192223
389.4	0.296691	0.298222	0.272994	0.242729	0.19237
389.6	0.296075	0.297545	0.272516	0.24243	0.192152
389.8	0.29599	0.296984	0.27243	0.242289	0.192094
390	0.29562	0.296382	0.272318	0.242143	0.192063
390.2	0.295297	0.296127	0.272197	0.242439	0.192198
390.4	0.29496	0.295957	0.272051	0.241923	0.192316
390.6	0.294684	0.29615	0.272172	0.241463	0.19223
390.8	0.294838	0.29603	0.272453	0.241326	0.192289
391	0.294514	0.295759	0.272677	0.241235	0.192564
391.2	0.294072	0.295396	0.272654	0.241098	0.192536
391.4	0.293326	0.295071	0.272371	0.240393	0.192526
391.6	0.293117	0.294978	0.272129	0.240204	0.192804
391.8	0.292295	0.294758	0.271934	0.239809	0.192547
392	0.29188	0.294764	0.271756	0.240171	0.192765
392.2	0.291407	0.294389	0.27133	0.240244	0.192473
392.4	0.290711	0.294372	0.271061	0.240554	0.192207
392.6	0.290118	0.293833	0.270618	0.240128	0.192229
392.8	0.289712	0.293879	0.270538	0.240156	0.19212
393	0.289236	0.293424	0.26966	0.239603	0.192179
393.2	0.289255	0.293471	0.269687	0.240275	0.192615
393.4	0.28887	0.293563	0.269561	0.24029	0.193135
393.6	0.288607	0.293131	0.269099	0.240272	0.192986
393.8	0.288814	0.292614	0.269028	0.240439	0.193239
394	0.288475	0.292987	0.268783	0.240872	0.193127
394.2	0.288181	0.292547	0.26851	0.240683	0.193023
394.4	0.288514	0.292544	0.268591	0.240578	0.192926
394.6	0.28836	0.292123	0.268318	0.240344	0.192463
394.8	0.288891	0.292022	0.268744	0.240966	0.192732
395	0.288541	0.291475	0.268552	0.241152	0.192944
395.2	0.288214	0.291279	0.268396	0.240884	0.192666
395.4	0.287956	0.291407	0.267911	0.240728	0.192464
395.6	0.287578	0.290845	0.267804	0.240794	0.19248
395.8	0.287151	0.290242	0.267446	0.240598	0.192174
396	0.286834	0.289912	0.267122	0.240838	0.191934
396.2	0.286805	0.289498	0.266702	0.240222	0.191536
396.4	0.285996	0.288676	0.266606	0.239515	0.191066
396.6	0.285543	0.287835	0.265886	0.238008	0.190568
396.8	0.284615	0.287782	0.265717	0.237197	0.190031
397	0.283949	0.287184	0.264978	0.236436	0.190024
397.2	0.283419	0.286827	0.265031	0.236	0.189865
397.4	0.283065	0.28683	0.264535	0.235464	0.190049
397.6	0.283255	0.286701	0.26448	0.235754	0.190172
397.8	0.282614	0.286507	0.264324	0.235834	0.190344
398	0.282108	0.286757	0.264005	0.235875	0.190098
398.2	0.282092	0.286162	0.264317	0.235907	0.189913
398.4	0.282033	0.28616	0.264389	0.236301	0.189994
398.6	0.282118	0.285595	0.264388	0.236437	0.190032
398.8	0.282602	0.285695	0.264682	0.237107	0.190659
399	0.282212	0.285423	0.26452	0.237115	0.190456
399.2	0.282194	0.285548	0.264579	0.237071	0.19017
399.4	0.282323	0.285073	0.264233	0.237224	0.190049
399.6	0.282143	0.284345	0.263862	0.236958	0.189913
[truncated: 1,601 more rows]
