# Supplementary material for: Specific binding of Hsp27 and phosphorylated Tau mitigates abnormal Tau aggregation-induced pathology
Source: eLife. 2022 Sep 1;11:e79898. doi: 10.7554/eLife.79898 (PMC9436411; doi:10.7554/eLife.79898)
Supplement: Figure 6—source data 1. — (Figure 6B). [file elife-79898-fig6-data1.xlsx]

## Sheet: A
residue numer	Hsp27	ACD	deltaC	deltaN	NTD
262	100	12.3854	65.8564	22.6823	60.8476
324	100	5.99239	55.139	17.3436	47.1346
352	100	12.7745	61.7106	24.9877	56.9577
356	100	14.6361	61.0367	22.4616	51.0826
309	5.56053	100	19.1293	35.9064	14.4019
310	12.1599	100	31.9425	24.6954	20.419
311	29.2216	100	69.628	51.4722	50.8959

## Sheet: B (left)
	Residue numer	ACD	deltaC	deltaN	NTD
	245	0.00557574	0.0182231	0.00927	0
	246	0	0.00762675	0.0024581	0.0054046
pro	247
	248	0.00703832	0.0016031	0.0054228	0.00153127
pro	249
	250	0.00051	0.00401	0.00185708	0.00449
pro	251
	252	0	0	0	0
	253	0	0.00336518	0	0.00232086
	254	0.000115089	0.00198518	0.000724426	0.00357771
	255	0	0.00554278	0.00174	0.00463102
	256	0.000892594	0.00300199	0.000701231	0.00134256
	257	0.00128	0.00392944	0.00128	0.00128
	258	0.00226	0.00762462	0	0.00341
	259	0	0.00154	0	0
	260	0	0	0	0
	261	0	0.00430207	0	0
	262	0.00748167	0.0397819	0.0137017	0.0367562
	263	0.00143315	0.00725981	0.000815453	0.00432532
	264	0	0.00989546	0.00282	0.00751662
	265	0.0029887	0.00364662	0	0.000973543
	266	0.00314537	0.00384343	0.00330211	0.00564252
	267	0.00223635	0.012329	0.00268043	0.010368
	268	0.00588789	0.0380154	0.0126502	0.0300966
	269	0	0	0	0
pro	270
	271	0	0.0021388	0	0
	272	0.00204353	0.00771215	0.00105853	0.0051056
	273	0.00204353	0.00771215	0.00105853	0.0051056
	274	0	0.00594698	0	0.00700028
	306	0	0	0	0
	307	0	0	0	0
	308	0.0190663	0.00364726	0.00684605	0.00274592
	309	0.0118821	0.00379545	0.00293434	0.00242621
	310	0.0100268	0.0069815	0.00516103	0.00510325
	311	0.00395	0.00794234	0.00141614	0.0068102
pro	312
	313	0	0	0	0
	314	0	0	0	0
	315	0	0	0	0
	316	0.0011711	0.00343692	0.000500464	0.00218641
	317	0	0.00358189	0	0.00460809
	318	0.00119793	0.00267636	0.000321041	0.00055104
	319	0.00201254	0.00609005	0.00108306	0.00286975
	320	0	0.0100127	0	0.00618699
	321	0	0	0	0
	322	0	0	0	0
	323	0	0.00587392	0.00282	0.00178
	324	0.00287687	0.0264715	0.00832643	0.0226287
	325	0.00263263	0.00591989	0.00245403	0.0030104
	326	0.00200868	0.00049	0.00123	0.00165
	327	0	0.0105347	0.00141702	0.00775051
	328	0.00168122	0.00786002	0.00199897	0.00815209
	329	0.00185146	0.00589345	0.00168686	0.00533473
his (unassigned)	330	0.00184924	0.0126647	0.00386898	0.00384497
	331
pro	332
	333	0	0.0021388	0	0
	334	0.00204353	0.00771215	0.00105853	0.0051056
	335	0.00204353	0.00771215	0.00105853	0.0051056
	336	0.00226003	0.00552007	0.00175606	0.00474065
	337	0.00281692	0.00430292	0.00144615	0.00293223
	338	0	0	0	0
	339	0.00288147	0.00275032	0.00215955	0.00284153
	340	0.00115755	0.0022909	0.00209239	0.00265328
	341	0.00291204	0.00304925	0.00203894	0.00133764
	342	0.00115755	0.00191395	0.0015389	0.00115854
	343	0	0.00430508	0.00063	0.00353175
	344	0	0.00251485	0	0
	345	0.00125284	0.00467832	0.00320883	0.00455221
	346	0	0.00594757	0	0.00686551
	347	0	0	0	0
	348	0	0	0	0
	349	0	0.00587392	0.00113	0.00355
	350	0	0	0	0
	351	0.00232037	0.00502685	0.00232037	0.00431774
	352	0.00900376	0.0434952	0.0176119	0.0401452
	353	0	0	0	0
	354	0	0	0	0
	355	0	0.00392776	0	0
	356	0.0138629	0.0578121	0.021275	0.0483839
	357	0	0	0	0
	358	0	0	0	0
	359	0	0.00554278	0.00174	0.00428215
	360	0.00131801	0.00596711	0.0024566	0.0056298
	361	0.00195064	0.00228635	0.00159272	0.00324399
	362	0.00276737	0.00377274	0.00497608	0.00621321
	363	0.00484666	0.0280475	0.00946596	0.024412
pro	364
	365	0	0.0021388	0	0
	366	0.00204353	0.00771215	0.00105853	0.0051056
	367	0.00204353	0.00771215	0.00105853	0.0051056
	368	0	0	0.00368715	0.00152134
	369	0.00112782	0.00414028	0.00163462	0.00285274
	370	0	0	0	0
	371	0	0	0	0
	372	0.00178576	0.00328567	0.000576923	0.0031515

## Sheet: B (right)
	Residue numer	ACD	deltaC	deltaN	NTD
	245	0.843214	0.409436	0.764952	0.243489
	246	0.941132	0.695616	0.870329	0.750219
pro	247
	248	0.869693	0.815887	0.907815	0.888787
pro	249
	250	1.01474	0.777914	0.938164	0.823824
pro	251
	252	0.988991	0.688005	0.906382	0.764115
	253	0.95736	0.785666	0.931402	0.811851
	254	0.970224	0.721661	0.932643	0.72916
	255	0.956313	0.793731	0.918135	0.811869
	256	0.961525	0.78251	0.932929	0.833291
	257	0.973212	0.654531	0.909001	0.711233
	258	0.841071	0.459936	0.827806	0.505429
	259	0.980782	0.840786	0.930154	0.85658
	260	0.975042	0.727223	0.922242	0.758523
	261	0.98246	0.85564	0.943535	0.883973
	262	1.23714	0.969315	1.18088	0.980213
	263	0.973189	0.686513	0.89192	0.753419
	264	0.977454	0.776197	0.925945	0.760528
	265	0.951774	0.639763	0.849727	0.748248
	266	0.945091	0.799646	0.934357	0.82301
	267	0.960389	0.830317	0.917957	0.851313
	268	1.04943	0.745707	0.995673	0.841447
	269	0.894082	0.747255	0.826752	0.685286
pro	270
	271	0.860607	0.476384	0.748417	0.4732
	272	0.943413	0.670541	0.898752	0.710208
	273	0.943413	0.670541	0.898752	0.710208
	274	0.963433	0.748658	0.916463	0.800438
	306	0.562814	0.804257	0.713468	0.891791
	307	0.888583	0.717256	0.864934	0.776199
	308	0.622669	0.585175	0.693613	0.734658
	309	0.508204	0.590331	0.707842	0.800097
	310	0.680843	0.579423	0.710857	0.779572
	311	0.922625	0.598017	0.85709	0.747325
pro	312
	313	0.96536	0.829442	0.938829	0.852297
	314	0.971323	0.654959	0.924965	0.755582
	315	0.888583	0.717256	0.864934	0.776199
	316	0.927806	0.622166	0.848665	0.741207
	317	0.971996	0.612524	0.92754	0.702228
	318	0.936241	0.650357	0.878678	0.77351
	319	0.969256	0.875812	0.979896	0.86586
	320	0.807735	0.728689	0.740821	0.771921
	321	0.936701	0.728347	0.883636	0.760147
	322	0.988991	0.688005	0.906382	0.764115
	323	1.02407	0.538695	0.852317	0.701086
	324	1.07247	0.802479	1.03603	0.930588
	325	0.98579	0.819827	0.924596	0.87292
	326	0.79397	0.69315	0.878252	0.5895
	327	0.955134	0.687914	0.900122	0.715782
	328	0.9789	0.791239	0.942446	0.819054
	329	0.962227	0.757588	0.920886	0.775368
his (unassigned)	330
	331	1.10808	1.52343	1.37098	1.7366
pro	332
	333	0.860607	0.476384	0.748417	0.4732
	334	0.943413	0.670541	0.898752	0.710208
	335	0.943413	0.670541	0.898752	0.710208
	336	0.942651	0.703377	0.921927	0.736657
	337	0.936918	0.823491	0.920558	0.861534
	338	0.888583	0.717256	0.864934	0.776199
	339	0.958227	0.847855	0.946748	0.882762
	340	0.895546	0.70253	0.847125	0.729798
	341	0.905901	0.594621	0.837495	0.668647
	342	0.993373	0.703325	0.876632	0.754349
	343	0.962227	0.757588	0.920886	0.775368
	344	0.95736	0.785666	0.931402	0.811851
	345	0.957001	0.798228	0.942828	0.799599
	346	0.963433	0.748658	0.916463	0.800438
	347	1.00771	0.753379	0.914158	0.798275
	348	0.96536	0.829442	0.938829	0.852297
	349	0.975503	0.851599	0.939476	0.864202
	350	0.311567	0.818751	0.51322	0.935498
	351	0.978031	0.818236	0.955822	0.86602
	352	1.20319	1.15911	1.18377	1.14479
	353	0.935278	0.766521	0.893919	0.786296
	354	0.975042	0.727223	0.922242	0.758523
	355	0.976289	0.849906	0.924629	0.840753
	356	1.47904	1.40579	1.41999	1.40033
	357	0.933032	0.569161	0.848918	0.638393
	358	0.984106	0.840681	0.956125	0.844058
	359	0.956563	0.803053	0.920505	0.821404
	360	0.963945	0.830874	0.935535	0.855865
	361	1.04546	0.876065	1.10745	0.953324
	362	1.06052	0.878366	0.915253	0.64261
	363	1.0031	0.937214	1.03211	0.947426
pro	364
	365	0.860607	0.476384	0.748417	0.4732
	366	0.943413	0.670541	0.898752	0.710208
	367	0.943413	0.670541	0.898752	0.710208
	368	0.883488	0.503795	0.787148	0.649683
	369	0.965675	0.709962	0.879187	0.717071
	370	0.99694	0.868647	0.954835	0.874739
	371	0.935278	0.766521	0.893919	0.786296
	372	1.00526	0.998484	0.993109	0.974686
