# Supplementary material for: Specific binding of Hsp27 and phosphorylated Tau mitigates abnormal Tau aggregation-induced pathology
Source: eLife. 2022 Sep 1;11:e79898. doi: 10.7554/eLife.79898 (PMC9436411; doi:10.7554/eLife.79898)
Supplement: Figure 7—source data 1. [file elife-79898-fig7-data1.xlsx]

## Sheet: A
	pTau40=10uM			pTau40:Hsp27=1:0.5			pTau40:NTD=1:0.5			pTau40:deltaCTD=1:0.5			pTau40:ACD=1:0.5			pTau40:deltaNTD=1:0.5
0	0	0	0	0	0	0	0	0	0	0	0	0	0	0	0	0	0	0
4	0.174419	0.19186	0.156977	0.0755814	0.116279	0.127907	0.110465	0.0523256	0.104651	0.0639535	0.110465	0.0930233	0.226744	0.22093	0.226744	0.186047	0.209302	0.215116
7.99	0.401163	0.459302	0.418605	0.180233	0.226744	0.25	0.22093	0.162791	0.186047	0.168605	0.197674	0.209302	0.412791	0.377907	0.44186	0.366279	0.383721	0.395349
11.99	0.616279	0.633721	0.616279	0.244186	0.296512	0.325581	0.25	0.209302	0.226744	0.215116	0.232558	0.232558	0.563953	0.523256	0.575581	0.5	0.511628	0.494186
15.99	0.767442	0.825581	0.77907	0.27907	0.360465	0.366279	0.261628	0.209302	0.238372	0.244186	0.255814	0.255814	0.639535	0.610465	0.662791	0.598837	0.639535	0.593023
19.98	0.848837	0.889535	0.854651	0.343023	0.430233	0.424419	0.296512	0.244186	0.284884	0.27907	0.284884	0.302326	0.703488	0.680233	0.726744	0.697674	0.715116	0.662791
23.98	0.860465	0.959302	0.901163	0.354651	0.430233	0.465116	0.319767	0.25	0.296512	0.296512	0.319767	0.30814	0.755814	0.726744	0.761628	0.726744	0.738372	0.703488
27.98	0.906977	0.965116	0.924419	0.383721	0.465116	0.488372	0.354651	0.290698	0.302326	0.302326	0.331395	0.325581	0.767442	0.755814	0.80814	0.773256	0.77907	0.744186
31.97	0.918605	0.988372	0.936047	0.395349	0.488372	0.482558	0.383721	0.325581	0.313953	0.30814	0.348837	0.331395	0.80814	0.761628	0.813953	0.761628	0.802326	0.761628
35.97	0.953488	0.982558	0.94186	0.44186	0.5	0.5	0.383721	0.343023	0.30814	0.313953	0.354651	0.313953	0.819767	0.773256	0.837209	0.77907	0.819767	0.767442
39.97	0.953488	1	0.965116	0.430233	0.517442	0.540698	0.401163	0.372093	0.331395	0.313953	0.337209	0.302326	0.80814	0.784884	0.866279	0.796512	0.825581	0.773256
	pTau40=10uM			pTau40+Hsp27			pTau40+NTD			pTau40+deltaCTD			pTau40+ACD			pTau40+deltaNTD
39.97	0.953488	1	0.965116	0.430233	0.517442	0.540698	0.401163	0.372093	0.331395	0.313953	0.337209	0.302326	0.80814	0.784884	0.866279	0.796512	0.825581	0.773256

## Sheet: B
	pK19=10uM			pK19:Hsp27=1:0.5			pK19:NTD=1:0.5			pK19:deltaCTD=1:0.5			pK19:ACD=1:0.5			pK19:deltaNTD=1:0.5
0	0	0	0	0	0	0	0	0	0	0	0	0	0	0	0	0	0	0
4	0.371151	0.363047	0.431118	0.113452	0.141005	0.116694	0.312804	0.309562	0.309562	0.0145867	0.0307942	0.012966	0.189627	0.23825	0.230146	0.431118	0.455429	0.41329
7.99	0.50081	0.601297	0.711507	0.23987	0.291734	0.267423	0.405186	0.414911	0.423015	0.113452	0.401945	0.0875203	0.358185	0.463533	0.437601	0.539708	0.56564	0.474878
11.99	0.696921	0.875203	0.888169	0.303079	0.340357	0.314425	0.403566	0.435981	0.439222	0.307942	0.479741	0.186386	0.439222	0.481361	0.487844	0.56564	0.578606	0.541329
15.99	0.771475	0.899514	0.850891	0.359806	0.410049	0.332253	0.421394	0.423015	0.440843	0.410049	0.479741	0.262561	0.465154	0.494327	0.486224	0.611021	0.614263	0.656402
19.98	0.784441	0.888169	0.904376	0.398703	0.45705	0.345219	0.421394	0.421394	0.43436	0.431118	0.484603	0.28201	0.481361	0.502431	0.482982	0.628849	0.649919	0.713128
23.98	0.815235	0.899514	0.933549	0.416532	0.471637	0.358185	0.418152	0.416532	0.437601	0.435981	0.486224	0.293355	0.495948	0.505673	0.49919	0.645057	0.696921	0.771475
27.98	0.880065	0.931929	0.954619	0.429498	0.50081	0.367909	0.421394	0.414911	0.445705	0.440843	0.491086	0.301459	0.529984	0.526742	0.52188	0.645057	0.703404	0.807131
31.97	0.915721	0.949757	0.961102	0.445705	0.508914	0.372771	0.416532	0.421394	0.432739	0.440843	0.495948	0.299838	0.555916	0.541329	0.528363	0.659643	0.71799	0.84765
35.97	0.925446	0.970827	0.987034	0.445705	0.518639	0.371151	0.411669	0.408428	0.439222	0.437601	0.486224	0.303079	0.573744	0.541329	0.539708	0.627229	0.750405	0.831442
39.97	0.954619	0.991896	1	0.448947	0.518639	0.376013	0.41329	0.406807	0.432739	0.440843	0.489465	0.301459	0.581848	0.554295	0.562399	0.643436	0.734198	0.844408
	pK19=10uM			pK19+Hsp27			pK19+NTD			pK19+deltaCTD			pK19+ACD			pK19+deltaNTD
39.97	0.954619	0.991896	1	0.448947	0.518639	0.376013	0.41329	0.406807	0.432739	0.440843	0.489465	0.301459	0.581848	0.554295	0.562399	0.643436	0.734198	0.844408
